# Supplementary material
Source: bioRxiv or medRxiv preprint supplement (https://www.biorxiv.org/highwire/filestream/47690/field_highwire_adjunct_files/0/092874-1.pdf)
Supplement: Supplementary file [file 092874-1.pdf]

## **Supplementary Material**

### **Study sample**

The vervets used in this study are part of a pedigreed research colony that has included more than 2,000 monkeys since its founding. Briefly, the Vervet Research Colony (VRC) was established at UCLA during the 1970's and 1980's from 57 founder animals captured from wild populations on the adjacent Caribbean islands of St. Kitts and Nevis; Europeans brought the founders of these populations to the Caribbean from West Africa in the 17<sup>th</sup> Century <sup>1</sup>. The breeding strategy of the VRC has emphasized the promotion of diversity, the preservation of the founding matriline, and providing all females and most of the males an opportunity to breed. The colony design modeled natural vervet social groups to facilitate behavioral investigations in semi-natural conditions. Social groups were housed in large outdoor enclosures with adjacent indoor shelters. Each enclosure had chain link siding that provided visual access to the outside, with one or two large sitting platforms and numerous shelves, climbing structures and enrichment devices. The monkeys studied were members of 16 different social matrilineal groups, containing from 15 to 46 members per group. In 2008 the VRC was moved to Wake Forest School of Medicine's Center for Comparative Medicine Research, however the samples for gene expression measurements in Dataset 1 (see below) and the MRI assessments used in this study occurred when the colony was at UCLA.

### **Gene expression phenotypes**

Two sets of gene expression measurements were collected. Dataset 1 used RNA obtained from whole blood in 347 vervets, assayed by microarray (Illumina HumanRef-8 v2); Dataset 2 assayed gene expression by RNA-Seq, in RNA obtained from 58 animals, with seven tissues (adrenal, blood, Brodmann area 46 [BA46], caudate, fibroblast, hippocampus and pituitary) measured in each animal.

#### *Dataset 1: Microarray (blood)*

The microarray data set has been described in Jasinska et al. <sup>2</sup> and is available at NCBI at the BioProject PRJNA115831. Briefly, Total RNA from whole blood preserved in PaxGene RNA Blood tubes (PreAnalyticX) was extracted using PAXgene Blood RNA Kit (PreAnalyticX). The integrity of the extracted total RNA samples was assessed on the Agilent 2100 Bioanalyzer (Agilent Technologies) with the RNA 6000 Nano Assay Kit (Agilent Technologies), and sample concentrations were quantified with RiboGreen RNA (Invitrogen).

For assessing transcript levels, we used the Illumina HumanRef-8 v2 chip. This chip provides genome-wide transcriptional coverage of well-characterized genes and splice variants. This chip uses 22,184 probes representing 18,189 unique human genes (or 20,424 unique transcripts) from Reference Sequence (RefSeq) database1, Release 17. The Illumina gene expression platform utilizes 50-mer gene-specific probes that provide both good selectivity and sensitivity <sup>3</sup>. We expected that the long probes would also tolerate

sequence incompatibilities between human probe sequence and vervet target transcripts and be more robust than shorter probes to possible allelo-specific differences in hybridization efficiency due to vervet-specific SNP variants occurring in probe-interaction sites <sup>4</sup>.

cDNA was synthesized and *in vitro* transcribed into biotinylated cRNA using the Illumina Totalprep RNA amplification kit, following the manufacturer's instructions (Ambion). Labeled cRNA was hybridized to the HumanRef-8 version 2 (Illumina) gene expression bead-chip. A gene was called detectable by BeadStudio when the detection p-value was <0.01. The gene expression module of the BeadStudio software version 3.1 (Illumina) was used for initial data processing and background correction. Lumi software was also used to perform a variance-stabilizing transformation that takes advantage of the technical replicates available on every Illumina microarray (usually over 30 randomly distributed beads per probe), and subsequently performs robust spline normalization and quality control of gene expression measures <sup>5</sup>.

Probe filtering for eQTL analysis: The probes on the Illumina HumanRef-8 v2 microarray were originally developed for assaying gene expression in humans. We selected probes that were compatible with vervet genomic sequence based on the following criteria: contain no indels, up to a total of five mismatches in a probe, with maximum of one mismatch in the 16 nt central portion of the probe). To prevent expression measurement-bias due to SNP interference with the hybridization process, we excluded probes targeting sequences with high-quality common SNPs identified in the VRC pedigree. For this filtering step, we used a set of 3.45 Mln high-quality SNPs segregating in the VRC with MAF $\geq$ 10%. A total of 11,001 probes passed these filters (Supplementary Data 1). We then evaluated the detection levels of each probe in all animals, and retained for analysis 6,018 probes that were detected with Illumina p<0.05 in at least 5% of animals.

#### Dataset 2: RNA-Seq (seven tissues)

Below we describe sample collection and processing, and determination of expression counts for the RNA-Seq gene expression dataset.

Tissue collection for RNA: Tissues were obtained from 60 vervets during experimental necropsies. The vervets represented a range of developmental stages from neonates (7 days), infants (90 days and one year), young juveniles (1.25, 1.5, 1.75, 2 years old), peri-adolescents or subadults (2.5, 3 years old) to adults (4+ years old) with 6 vervets (3 males and 3 females) from each developmental time point. Two animals (a 1.75 year old female and a 7 day old male) were excluded for the eQTL study as they did not have WGS data, leaving a total of 58 monkeys with RNA-Seq and whole genome sequencing (WGS) data for eQTL analysis. Two samples (from caudate and BA46) from individual 2008147 were excluded after the PCA analysis suggested a sample mix-up between tissues.

Vervets were anesthetized with 10-15 mg/kg of ketamine administered intramuscularly followed by pentobarbital 100 mg/kg administered intravenously. After animals reached a deep plane of anesthesia, the abdominal and thoracic cavities were opened and the

vasculature was perfused with normal saline chilled to 4° C administered via the left cardiac ventricle until perfusate escaping through a cut in the inferior vena cava became blood free. After exsanguination, the head was then disarticulated and the top of the cranium removed using Ronjeurs to chip off small bone pieces. Keeping the Ronjeurs superficial to the dura, bone was first removed at the base of the skull, proceeding anteriorly just above the ear canal and across the brow ridge to fully encircle the entire head. The dura was then cut with scissors, and the top of the skull was removed with Ronjeurs. Scissors were used to cut cranial nerves II-XII to free the brain, keeping the olfactory nerve and olfactory bulb together with the brain when possible. After removal, the brain was weighed, and then hemisected with a scalpel. The right hemisphere was preserved in 10% neutral buffered formalin and the left hemisphere was dissected. Brain tissues were generally collected within 60-70 minutes of removal of the brain from the skull. All brain samples were placed immediately in RNAlater and refrigerated for 24 hours. The RNAlater was then removed and the tissue frozen at -80° C or below.

For 14 necropsies performed after August 4, 2010, the necropsy protocol was modified as follows: 1) 100% oxygen was delivered to the animal by face mask starting before pentobarbital administration and continuing until initiation of saline perfusion; 2) the animal was placed on a bed of ice prior to pentobarbital administration (but after ketamine administration) to accelerate cooling of tissues; 3) dissection protocols were streamlined to minimize the time elapsed between pentobarbital administration and removal of the brain from the skull and to minimize the time elapsed to the completion of brain dissection.

During necropsies of 30 vervets whose brain tissues were used in this study, a fresh frozen sample of occipital lobe was collected near the end of the dissection procedure to allow tissue pH to be measured. pH was measured in occipital lobe specimens as described by Harrison et al.<sup>6</sup>. pH ranged from 5.98 to 6.98 (mean pH 6.6, SD 0.2). These data were used to assess the potential effect of brain pH on gene expression PC patterns (see Possible Technical and Biological Covariates).

BA46: The samples were collected from both banks of the principal sulcus, bluntly dissecting downward with forceps inserted at the upper margin of each bank to free tissue to the floor of the principal sulcus. The midpoint of the principal sulcus along its length was used as the posterior margin for the collected samples, which extended anteriorly for the length of the sulcus. The samples collected from the two sulcal banks were pooled at the time of dissection and processed as a single sample.

Caudate: From the medial surface of the hemisected brain, forceps were inserted into the lateral ventricle and used to remove the overlying tissue, exposing the caudate. A coronally oriented cut was then made through the head of the caudate, and caudate tissue was pinched from the portion of the brain anterior to this cut using forceps.

Hippocampus: To obtain the hippocampal sample, a coronally oriented cut was made with a scalpel through the occipital pole, passing through the head and body of the hippocampus. Blunt dissection with forceps was used to isolate the hippocampus from surrounding tissue, extending approximately 2-3 mm into the exposed tissue face.

RNA collection: The following tissue preservation methods were used during the collection to maintain sample quality. Whole blood was drawn into PAXgene RNA Blood Tubes (PreAnalyticX) with reagent instantly stabilizing RNA profiles. Solid tissues were preserved in RNAlater reagent (Ambion) immediately after collection, protecting the integrity of RNA profiles.

To establish fibroblast cultures, skin biopsies were collected from shaved and cleaned skin from an area of the middle of the thigh (outer side) using a skin punch, after ketamine anesthesia but prior to euthanasia. Biopsies were placed in cell culture medium (79% Minimum Essential Media, CORNING Cellgro, 20% Fetal Bovine Serum, CORNING Cellgro, 1% Antibiotic-Antimycotic, Gibco) and shipped to UCLA at ambient temperature until the next day when the cultures were started from skin explants. Cell pellets from fibroblast cultures in the second passage were collected into Triazol reagent (Qiagen), immediately stabilizing RNA.

The following methods were used for RNA extraction for seven tissues used in this study, three brain tissues (BA46, caudate, and hippocampus), two endocrine tissues (adrenal and pituitary) and two peripheral tissues (blood and fibroblasts): PaxGene RNA Kit (Qiagen) for blood, miRNease (Qiagen) for fibroblast, PerfectPure RNA (5PRIME) or miRNeasy (Qiagen) for adrenal, BA46, caudate, hippocampus, and pituitary. RNA integrity was assessed via measuring RIN scores on either Bioanalyzer 2100 (Agilent) or 2200 TapeStation (Agilent), and RNA yield was determined with RiboGreen RNA (Invitrogen). RIN score values for each sample type were: 9.6 (SD=0.54) in cultured skin fibroblasts, 7.98 (SD=0.99) in blood, 8.22 (SD=0.54) in adrenal cortex, 8.05 (SD=0.61) in pituitary, 6.35 (SD=0.7) in caudate, 6.35 (SD=0.7) for hippocampus, and 6.04 (SD=0.5) in BA46.

RNA sequencing (RNA-Seq): We conducted RNA-Seq across the seven tissues, as follows:

From purified RNA, we created two types of cDNA libraries. For fibroblasts, adrenal and pituitary, we used poly-A RNA cDNA libraries, since that was the only protocol available at that time when we started working with these tissues. For BA46, blood, caudate, and hippocampus, we used more recently available total RNA cDNA libraries that allowed us to obtain data not only in polyadenylated transcripts but also non-coding RNAs. For all samples, for each tissue, only one type of library was created. For these library preps we used either the TruSeq RNA SamplePrep v2 kit (Illumina, [http://support.illumina.com/content/dam/illumina-support/documents/documentation/chemistry\\_documentation/samplepreps\\_truseq/truseq\\_rna/truseq-rna-sample-prep-v2-guide-15026495-f.pdf](http://support.illumina.com/content/dam/illumina-support/documents/documentation/chemistry_documentation/samplepreps_truseq/truseq_rna/truseq-rna-sample-prep-v2-guide-15026495-f.pdf)) or this same kit mated to the standalone RiboZero Gold rRNA reduction kit (Epicentre, [http://www.epibio.com/docs/default-source/protocols/ribo-zero-magnetic-gold-kit-\(human-mouse-rat\).pdf?sfvrsn=16](http://www.epibio.com/docs/default-source/protocols/ribo-zero-magnetic-gold-kit-(human-mouse-rat).pdf?sfvrsn=16)). The preps that used poly-A selection used the standard TruSeq RNA SamplePrep protocol without changes. The preps that used RiboZero followed the stand-alone RiboZero protocol with a final cleanup with Ampure RNAClean XP beads (Appendix A). rRNA reduced RNA samples were eluted off of the Ampure beads in 11 ul resuspension buffer and 8.5 ul of the eluted product was combined with 8.5 ul of 2x EPF

buffer. At this point the samples were subjected to the TruSeq RNA SamplePrep v2 protocol at the "Incubate RFP" step, which was completed with no further changes.

To minimize lane effects, we multiplexed libraries into pools, where each library is indexed with a unique tag; we then split each pool between different sequencing lanes to generate technical replicates. Each pool was run in a minimum of three lanes on an Illumina HiSeq2500 HiSeq 4000 instrument. We generated paired end 100 bp reads, and paired and 120 bp reads from the project. On average, 56.6 Mln reads per sample were generated (Supplementary Table 20). The RNA-Seq reads data were made available through NCBI as BioProject PRJNA219198.

Determination of gene expression based on RNA-Seq read counts: RNA-Seq reads were aligned to the vervet genomic assembly *Chlorocebus\_sabeus* 1.1 [http://www.ncbi.nlm.nih.gov/assembly/GCF\\_000409795.2](http://www.ncbi.nlm.nih.gov/assembly/GCF_000409795.2) with gene name revisions provided by NCBI before Aug 10th 2016 by the ultrafast STAR aligner<sup>7</sup> using our standardized pipeline. STAR was run using default parameters that allow a maximum of ten mismatches. Gene expression was measured as total read counts per gene. For paired end experiments, total fragments are considered. Fragment counts that aligned to known exonic regions based on the NCBI *Chlorocebus\_sabeus* Annotation Release 100 were quantified using the HTSeq package<sup>8</sup>. The HTSeq-count script was executed using intersection\_nonempty mode, which excluded ambiguous reads that map to regions where there are multiple genes. All other reads mapping to a single gene were included in the corresponding gene counts. The counts for all 33,994 genes were then combined and lowly expressed genes, defined as genes with a mean count of less than 1 across all samples, as well as genes detected in fewer than 10% of samples, were filtered out. We set this threshold higher than that used in Dataset 1 (5% of samples with a given gene detected) because of the much smaller sample size in Dataset 2. Finally, quantile normalization was applied to the remaining genes to obtain normalized gene counts.

In Supplementary Table 2, we summarize biotypes of quantified RNAs. The overall number of genes as well as of protein-coding, non-coding and pseudogenes is the largest in blood and the smallest in fibroblasts. The difference in the number of expressed genes may stem from differences in cell composition: a high cellular heterogeneity in blood versus monoculture of skin fibroblasts. As expected given the differences in library generation protocols, fibroblasts, adrenal and pituitary (generated with the poly-A protocol) have lower numbers of non-coding genes than hippocampus, BA46, caudate and blood (generated with the total RNA protocol).

### **Comparative expression analysis using Allen Brain Atlas (ABA) datasets from human and rhesus macaque**

We compared gene expression in matched age categories between vervet (our data), human<sup>9</sup>, and rhesus macaque<sup>10</sup>. The comparison of vervet BA46 with rhesus macaque medial frontal cortex used 12 vervets (3 animals per time point). The comparison of vervet caudate with rhesus macaque basal ganglia used 11 animals: 2 animals for the first age category (age 7 days in vervet), 3 animals for remaining time points, and the comparison of

vervet and rhesus macaque hippocampus used 12 animals (3 animals per time point). The comparison of vervet BA46 with human BrainSpan DLPFC data used 18 vervets: 2 males at age 7 days, 1 male at age 90 days, 2 males and 2 females at age 1-1.25y, 2 males and 1 female at age 1.5-2.5y, 1 male and 2 females at age 3-4y. The comparison of vervet caudate with human BrainSpan striatum data used 14 vervets: 1 male at 7 days, 2 males and 1 female at age 1-1.25y, 1 male at age 1.5-2.5y, 2 females at age 3-4y, and 3 males and 3 females at age 5y or older. The comparison of vervet and human BrainSpan hippocampus data used, 17 samples: (T6: 2M, T7: 1F, T8: 1M + 1F, T9: 2M + 1F, T10: 2F + 1M, T11: 3F + 3M).

For each of the tissues in Supplementary Table 23, we identified the 1,000 most variable genes in each species and identified orthologous genes. We then ranked genes according to their mean expression, and compared ranks using the Spearman correlation ( $\rho$ ). Analysis was done separately by tissue and age group. We observed a moderate correlation between vervet and human ranked expression in hippocampus and between vervet BA46 and human DLPFC, with  $\rho$  for both comparisons averaging 0.62. We found a slightly lower correlation between vervet caudate and human striatum, with  $\rho$  averaging 0.56 (Supplementary Table 4). The comparisons of rank expression in vervet and rhesus macaque yielded smaller correlations than comparisons with human ( $\rho \sim 0.35$ ), probably due to the difference in gene expression platform (the rhesus macaque data are based on microarray, Supplementary Table 5). We also compared expression in adrenal, blood, caudate, hippocampus, and pituitary between vervet and GTEx<sup>11</sup> and observed ranked expression correlation ranging from  $\rho = 0.79$  for adrenal and pituitary and  $\rho = 0.68$  in caudate (Supplementary Table 6).

### **Evaluation of tissue specific gene expression in Dataset 2**

We identified 137 genes (27 in adrenal, 72 in blood, 3 in caudate, 22 in fibroblast, and 13 in pituitary) where mean normalized gene expression was  $>100$  cpm in one tissue, and  $<10$  cpm in all other tissues (Supplementary Table 3). Many of these genes have distinctive functions and/or expression patterns associated with a given tissue. For example, in adrenal this list includes numerous genes involved in steroid hormone metabolism, such as *STAR*, which regulates cholesterol metabolism and steroid production in adrenal cortex, and *MC2R*, which is a form of adrenocorticotrophic hormone receptor (*ACTH* receptor) acting in adrenal cortex. In pituitary this list includes *POMC*, a gene coding a precursor of adrenocorticotrophic hormone (*ACTH*) and *CGA*, a gene coding an alpha subunit of luteinizing hormone, follicle stimulating hormone, and thyroid stimulating hormone, all of which are hormones produced by pituitary. In blood the list includes several genes specific to different blood cell lineages; in fibroblasts, it includes *FAP*, a gene controlling fibroblast growth. In caudate, it includes *SYNDIG1L*, a gene known to be predominantly expressed in non-human primate (capuchin monkey) striatum.

### **Possible technical and biological covariates**

Several technical experimental variables are known to influence gene expression assays, including premortem acidosis (as reflected by tissue pH), RNA integrity (RIN), RNA

extraction protocols, and interval between death and tissue harvesting. Given the possible impact on this tissue of diurnal and seasonal variations in cortisol secretion, we considered two additional covariates for adrenal: time of day of necropsy and date of necropsy. None of these variables showed correlation with any PCs in any of the seven tissues that we examined, except RNA-Seq batch. Sample batch showed correlation with PC2 in adrenal and pituitary, and PC3 in caudate and pituitary (data not shown), and, therefore, was used as a covariate in eQTL analyses.

### **Genes with the highest loadings on the PCs associated with age and sex**

In each tissue, we examined the genes in the top and bottom 10% of the distribution of PC loadings on PCs 1, 2, or 3 (200 genes total per tissue, per PC), in relation to age (PC1 in BA46 and caudate) or sex (PC2 in caudate, BA46 and blood, PC1 in hippocampus and pituitary, and PC3 in adrenal) (Supplementary Tables 7, 8).

Genes with the highest loadings on PCs associated with age in BA46 and caudate The lists of genes with age-related expression patterns in BA46 and the caudate (Supplementary Table 8) includes several genes that are both essential for nervous system development and implicated in the causation of human disorders. Figure 2 and Supplementary Figure 2 show expression patterns by age-point of some notable examples.

In the main text we described the age-related PC1 variation in BA46 of thrombospondin genes. Among the other genes contributing to such age-related PC1 variation in BA46 are several genes involved in myelination (*MOG*, *MAG*, *OPALIN*, *MBP*), all of which show increased expression with age (Supplementary Figure 3). Similar age-related upregulation of these genes is observed in human DLPFC from ABA (Supplementary Figure 3). These genes are not represented in the rhesus macaque dataset in ABA. Coordinated increase of expression of genes regulating myelination suggests that the BA46 age-related expression pattern (PC1) at least partially reflects this process.

In vervet caudate, *ASPM*, which regulates neurogenesis in the cerebral cortex and, when mutated, results in primary microcephaly<sup>12</sup>, shows a systematic decrease across development that resembles the expression patterns of these gene in human and rhesus macaque datasets from ABA (Supplementary Figure 3). *NDRG1* displays an increasing expression pattern with age in vervet caudate that is concordant with the human expression profile in striatum in ABA (Supplementary Figure 3). This gene is not represented in rhesus macaque basal ganglia in ABA. *NDRG1* (i) stimulates cellular differentiation and proliferation, (ii) is commonly involved in somatic rearrangements leading to medulloblastoma (the most prevalent pediatric brain tumor<sup>13</sup>), and (iii) when mutated, causes a progressive peripheral neuropathy, Charcot-Marie-Tooth (CMT) disease Type 4d.

Genes with the highest loadings on PCs associated with sex Among genes contributing to the sex-related expression patterns in specific tissues, perhaps the most striking examples are genes encoding the receptors for two structurally similar neuropeptides, the oxytocin receptor *OXTR* (in caudate) and the vasopressin receptor *AVPR1A* (in hippocampus). These

two genes function in a sex specific manner mediated by the sex-steroids estrogen (for *OXTR*<sup>14</sup>) and androgen (for *AVPR1A*<sup>15</sup>). The distribution and function of these genes also differ dramatically between mammalian species, including among some that are closely related. For example, a polymorphism in the promoter of *Avpr1a* has been associated, in prairie voles, with inter-species differences in sex-related social behaviors, such as pair bonding<sup>16</sup>. In monogamous prairie vole males, additional polymorphisms in this region result in inter-individual variation in expression of *Avpr1a* in hippocampus and other tissues comprising a memory circuit, and these expression differences are related to sex-specific spatial behaviors<sup>17</sup>. Another notable example from the hippocampus gene list is *PDYN*, encoding the opioid peptide dynorphin, which modulates hippocampal synaptic plasticity<sup>18</sup> in a sex-specific manner, mediated by estrogen<sup>19</sup>.

The lists of genes with sex-related expression patterns in pituitary and adrenal overlap substantially (40 of the top 200 genes in common) and include several molecules with functions in reproduction or in biological processes with a marked sex bias. Tissue-specific examples include, for pituitary, *TAC1*, encoding substance P, which regulates puberty onset and fertility<sup>20</sup> and *PTGER2* which plays a role in ovulation and fertilization<sup>21</sup>, and, for adrenal, *PRL*, which stimulates lactation in new mothers, plays a role in social behaviors, and is regulated by adrenal steroids<sup>22</sup>.

### **Comparison to DLPFC eQTLs from CommonMind Consortium (CMC)**

We downloaded the Open Access version of the eQTL results from CMC (<https://www.synapse.org/#!/Synapse:syn5652289>) generated from n=467 genetically-inferred Caucasian samples (209 schizophrenia cases, 206 controls, and 52 affective disorder cases) using RNA-Seq data from DLPFC<sup>23</sup>. The eQTL results are provided with FDR summarized into significance bins: <0.01, <0.05, <0.1, and <0.2. We compare vervet local eQTLs from three brain regions (BA46, caudate, hippocampus) with FDR<0.2 and FDR<0.05 (used as significance threshold in the CMC dataset by Fromer et al.<sup>23</sup>). The results for comparison of Bonferroni-corrected and FDR-corrected vervet eQTL with the CMC eQTL are summarized in Supplementary Table 13.

For our Bonferroni corrected eQTL set, almost 100% of local eQTL genes with human orthologs that were analyzed in the CMC data were found to have an eQTL at FDR < 0.20 in the CMC. Using the FDR < 0.05 threshold employed by the CMC manuscript<sup>23</sup>, 88.59% of our local eQTL genes have a local association in CMC.

For our FDR corrected results, we observe similar numbers, with 99% of our local eQTL genes also found to have a local eQTL at FDR < 0.20, and 88.16% at an FDR < 0.05. We observe the largest overlap of local brain eQTL between BA46 in vervet and DLPFC in human.

### **Correlation of expression between *IFIT1B* and genes regulated by the distant eQTL on CAE9**

On CAE 9, 76 SNPs across a ~500 Kb region displayed, in Dataset 1, a genome-wide significant local eQTL signal, and also genome-wide significant distant eQTLs for probes



representing up to 14 genes (Figure 3, Supplementary Table 18) on different vervet chromosomes (*RANBP10*, *SUGT1*, *LCMT1*, *HMBS*, *ST7*, *TMEM57*, *YPEL4*, *NARF*, *UBALD1*, *THBS4*, *DEDD2*, *CNN3*, *STXBP1*, *UQCR10*). We observed a high degree of genetic correlation between expression of *IFIT1B* and expression of the distantly regulated genes (Supplementary Table 17). For most of these distantly regulated genes the genetic correlation with *IFIT1B* is significantly different from 1, indicating that their expression derives from a shared genetic causation as well as genetic contributions that are unique for each transcript (incomplete pleiotropy).

### **Quantitative real-time PCR (qRT-PCR)**

Hippocampal expression results for the non-coding lncRNA genes associated with hippocampal volume were validated via qRT-PCR using the following TaqMan® assays with a FAM reporter.

Custom primers and hydrolysis probes were designed using the Custom TaqMan® Assays Design Tool (Applied Biosystems) as presented in Supplementary Table 24. Target sequences for primer and probe design were based on the NCBI Reference Sequences of *LOC103222765*, *LOC103222769*, *LOC103222771*, *HPRT1*, *GAPDH*, and *B2M*.

Each reverse transcription reaction contained 250ng total RNA in a final volume of 20µL. The diluted RT products used to create the cDNA pool were diluted once more (1:5 relative to the high standard) to ensure that the amount of template would fall within the established linear dynamic range of each assay. The cycling parameters for real-time PCR amplification were as follows: 95°C for 30 seconds, followed by 40 cycles of 95°C for 15 seconds and 60°C for 1 minute, with the fluorescence signal acquired at 60°C. Each 10µL qPCR reaction contained 5µL of iTaq® Universal Probes Supermix (Bio-Rad), 0.5µL of the 20x Custom TaqMan® Gene Expression Assay (primer concentration: 900nm; probe concentration: 250nm), 0.5µL of nuclease-free water, and 4µL of the twice-diluted cDNA.

Target sequences for custom primer and hydrolysis probe design were evaluated bioinformatically prior to submission to ensure quality. NCBI Primer-BLAST® was used to ensure specificity and avoid low-complexity regions, and common genetic variants were masked to prevent primer or probe design at those sites. TaqMan® MGB probes were designed to span an exon-exon boundary. Multiple coordinates for probe design were submitted for consideration, and the optimal probe sequence was determined by the Primer Express® Software (Applied Biosystems). The suitability of three reference gene candidates (*HPRT1*, *B2M*, and *GAPDH*) for normalization was evaluated using the NormFinder software (v5) in R<sup>24</sup>. As both *GAPDH* and *HPRT1* show a high stability of expression across all 16 animals, we used them as endogenous controls. Amplification efficiency was evaluated by a relative standard curve. The expression of each lncRNA in each sample was compared with a calibrator sample. All qRT-PCR procedures were designed and carried out according to Minimum Information for Publication of Quantitative Real-Time PCR Experiments(MIQE) guidelines<sup>25</sup>.

### **Hippocampal volume phenotype**

Structural MRI of 347 vervets > age 2 provided estimates of hippocampal volume, as described previously<sup>26,27</sup>. Briefly, nine structural images were acquired from each animal as axial T1-weighted volumes with a 3D magnetization prepared rapid acquisition gradient echo (MPRAGE) using an 8-channel high-resolution knee array coil as a receiver in a 1.5 Tesla Siemens (Erlangen) Symphony unit (TR 1900 msec; TE 4.38 msec; TI 1100 msec; flip angle 15 degrees; voxel resolution 0.5 mm in all three planes). The nine separate images were aligned to each other in pair-wise rigid body registrations and averaged together to yield one high signal-to-noise image. An affine population atlas was created from the individual MRI images using methods described by Woods<sup>28</sup> and phenotypes were generated from images transformed into this space. Hippocampi were segmented using a combination of manual and automated delineation<sup>26</sup>. Briefly, forty images were manually segmented in duplicate by ten extensively trained research assistants and these segmentations were used to train a hybrid discriminative/generative-learning algorithm<sup>29</sup>, which, in turn, was used to segment the entire set of images to produce the final phenotype. Prior to genetic analysis, hippocampal volumes were log transformed, regressed on sex and age in SOLAR, and residuals used as the final phenotype.

In hippocampus, the genome-wide significant eQTL SNPs reside in, and regulate expression of, two long non-coding RNA genes (lncRNA), *LOC103222765* (nine associated local eQTL SNPs) and *LOC103222769* (three associated local eQTL SNPs) located at a distance of 168 Kb from each other in the central portion of the QTL region for hippocampal volume. All significant SNPs within each locus are in complete LD ( $r^2=1$ ), but we observe no LD between the loci. An additional lncRNA gene, *LOC103222771*, situated two bp from *LOC103222769*, shows hippocampal specific association to six SNPs at a level ( $p < 10^{-9}$ ) just above genome-wide significance. All six SNPs associated to *LOC103222771* are in strong LD ( $r^2 > 0.93$ ).

Given the physical proximity of these lncRNAs, we used multivariate conditional analyses to evaluate whether the regulation of these genes depends on a single eQTL or two or three independent ones. For each lncRNA we designated a “lead SNP” (the SNP most significantly associated to its expression, Supplementary Table 19). The lead SNP for *LOC103222765* shows little correlation with the lead SNPs for *LOC103222769* ( $r^2=0.07$ ) or *LOC103222771* ( $r^2=0.0034$ ), while the lead SNPs for *LOC103222769* and *LOC103222771* are moderately correlated ( $r^2=0.55$ ). The minor allele frequencies of the lead SNPs for *LOC103222765*, *LOC103222769*, and *LOC103222771* are 0.43, 0.46, and 0.31, respectively (estimated in the full set of 721 vervets with genotype data) and are similar to frequency of the same alleles in an independent sample of 31 vervets from St. Kitts, the island from which the founders of the VRC pedigree derive (0.48, 0.34, and 0.27, respectively<sup>30</sup>). Multivariate conditional analyses suggest two eQTLs in this region; one associated to *LOC103222765*, and the second associated to *LOC103222769* and *LOC103222771*

## References

- 1 McGuire, M. T. & Members of the Behavioral Sciences Foundation. *The St. Kitts vervet*. Vol. 1 (Karger, 1974).
- 2 Jasinska, A. J. *et al.* Identification of brain transcriptional variation reproduced in peripheral blood: an approach for mapping brain expression traits. *Human molecular genetics* **18**, 4415-4427, doi:10.1093/hmg/ddp397 (2009).
- 3 Kuhn, K. *et al.* A novel, high-performance random array platform for quantitative gene expression profiling. *Genome Res* **14**, 2347-2356, doi:10.1101/gr.2739104 (2004).
- 4 Jacquelin, B. *et al.* Long oligonucleotide microarrays for African green monkey gene expression profile analysis. *FASEB J* **21**, 3262-3271, doi:10.1096/fj.07-8271com (2007).
- 5 Du, P., Kibbe, W. A. & Lin, S. M. lumi: a pipeline for processing Illumina microarray. *Bioinformatics* **24**, 1547-1548, doi:10.1093/bioinformatics/btn224 (2008).
- 6 Harrison, P. J. *et al.* The relative importance of premortem acidosis and postmortem interval for human brain gene expression studies: selective mRNA vulnerability and comparison with their encoded proteins. *Neurosci Lett* **200**, 151-154 (1995).
- 7 Dobin, A. *et al.* STAR: ultrafast universal RNA-seq aligner. *Bioinformatics* **29**, 15-21, doi:10.1093/bioinformatics/bts635 (2013).
- 8 Anders, S., Pyl, P. T. & Huber, W. HTSeq—a Python framework to work with high-throughput sequencing data. *Bioinformatics* **31**, 166-169, doi:10.1093/bioinformatics/btu638 (2015).
- 9 Kang, H. J. *et al.* Spatio-temporal transcriptome of the human brain. *Nature* **478**, 483-489, doi:10.1038/nature10523 (2011).
- 10 Bakken, T. E. *et al.* A comprehensive transcriptional map of primate brain development. *Nature* **535**, 367-375, doi:10.1038/nature18637 (2016).
- 11 GTEx Consortium. Human genomics. The Genotype-Tissue Expression (GTEx) pilot analysis: multitissue gene regulation in humans. *Science* **348**, 648-660, doi:10.1126/science.1262110 (2015).
- 12 Bond, J. *et al.* ASPM is a major determinant of cerebral cortical size. *Nature genetics* **32**, 316-320, doi:10.1038/ng995 (2002).
- 13 Northcott, P. A. *et al.* Subgroup-specific structural variation across 1,000 medulloblastoma genomes. *Nature* **488**, 49-56, doi:10.1038/nature11327 (2012).
- 14 Welsh, T. *et al.* Estrogen receptor (ER) expression and function in the pregnant human myometrium: estradiol via ERalpha activates ERK1/2 signaling in term myometrium. *The Journal of endocrinology* **212**, 227-238, doi:10.1530/JOE-11-0358 (2012).
- 15 Insel, T. R. The challenge of translation in social neuroscience: a review of oxytocin, vasopressin, and affiliative behavior. *Neuron* **65**, 768-779, doi:10.1016/j.neuron.2010.03.005 (2010).
- 16 Young, L. J. & Hammock, E. A. On switches and knobs, microsatellites and monogamy. *Trends in genetics : TIG* **23**, 209-212, doi:10.1016/j.tig.2007.02.010 (2007).
- 17 Okhovat, M., Berrio, A., Wallace, G., Ophir, A. G. & Phelps, S. M. Sexual fidelity trade-offs promote regulatory variation in the prairie vole brain. *Science* **350**, 1371-1374, doi:10.1126/science.aac5791 (2015).
- 18 Weisskopf, M. G., Zalutsky, R. A. & Nicoll, R. A. The opioid peptide dynorphin mediates heterosynaptic depression of hippocampal mossy fibre synapses and modulates long-term potentiation. *Nature* **362**, 423-427, doi:10.1038/362423a0 (1993).
- 19 Harte-Hargrove, L. C., Varga-Wesson, A., Duffy, A. M., Milner, T. A. & Scharfman, H. E. Opioid receptor-dependent sex differences in synaptic plasticity in the hippocampal mossy fiber pathway of the adult rat. *The Journal of neuroscience : the official journal of the Society for Neuroscience* **35**, 1723-1738, doi:10.1523/JNEUROSCI.0820-14.2015 (2015).

- 20 Simavli, S. *et al.* Substance p regulates puberty onset and fertility in the female mouse. *Endocrinology* **156**, 2313-2322, doi:10.1210/en.2014-2012 (2015).
- 21 Tamba, S. *et al.* Timely interaction between prostaglandin and chemokine signaling is a prerequisite for successful fertilization. *Proc Natl Acad Sci U S A* **105**, 14539-14544, doi:10.1073/pnas.0805699105 (2008).
- 22 Egli, M., Leeners, B. & Kruger, T. H. Prolactin secretion patterns: basic mechanisms and clinical implications for reproduction. *Reproduction* **140**, 643-654, doi:10.1530/REP-10-0033 (2010).
- 23 Fromer, M. *et al.* Gene expression elucidates functional impact of polygenic risk for schizophrenia. *Nat Neurosci* **19**, 1442-1453, doi:10.1038/nn.4399 (2016).
- 24 Andersen, C. L., Jensen, J. L. & Orntoft, T. F. Normalization of real-time quantitative reverse transcription-PCR data: a model-based variance estimation approach to identify genes suited for normalization, applied to bladder and colon cancer data sets. *Cancer Res* **64**, 5245-5250, doi:10.1158/0008-5472.CAN-04-0496 (2004).
- 25 Bustin, S. A. *et al.* The MIQE guidelines: minimum information for publication of quantitative real-time PCR experiments. *Clin Chem* **55**, 611-622, doi:10.1373/clinchem.2008.112797 (2009).
- 26 Fears, S. C. *et al.* Identifying heritable brain phenotypes in an extended pedigree of vervet monkeys. *The Journal of neuroscience : the official journal of the Society for Neuroscience* **29**, 2867-2875, doi:10.1523/JNEUROSCI.5153-08.2009 (2009).
- 27 Fears, S. C. *et al.* Anatomic brain asymmetry in vervet monkeys. *PloS one* **6**, e28243, doi:10.1371/journal.pone.0028243 (2011).
- 28 Woods, R. P., Grafton, S. T., Watson, J. D., Sicotte, N. L. & Mazziotta, J. C. Automated image registration: II. Intersubject validation of linear and nonlinear models. *J Comput Assist Tomogr* **22**, 153-165 (1998).
- 29 Tu, Z. *et al.* Brain anatomical structure segmentation by hybrid discriminative/generative models. *IEEE Trans Med Imaging* **27**, 495-508, doi:10.1109/TMI.2007.908121 (2008).
- 30 Jasinska, A. J. *et al.* Systems biology of the vervet monkey. *ILAR J* **54**, 122-143, doi:10.1093/ilar/ilt049 (2013).

## Supplementary Figure Legends

Supplementary Figure 1. Principle components 1, 2, 3, and 6 from analysis of gene expression levels (RNA-seq) in seven tissues. PC1 (47.5% of total variance) separates fibroblast from brain tissues, PC2 (18.2% of variance) separates blood from all other tissues, while the three brain regions do not separate until PC6 (2% of variance).

Supplementary Figure 2. Vervet age related genes: in BA46 *MOG*, *MAG*, *OPALIN*, and *MBP* involved in myelination, and *ASPM* and *NDRG1* in caudate.

Supplementary Figure 3. Expression profiles of orthologs of vervet genes with clear developmental trajectories, in similar tissues from human and rhesus macaque in the Allen Brain Atlas (ABA) data. (A) Top row: *THBS1*, *THBS2*, *THBS4* in human DLPFC (N=18); Bottom row: *THBS1*, *THBS2*, *THBS4* in rhesus medial frontal cortex (N=12). (B) *MOG*, *MAG*, *OPALIN* and *MBP* in human DLPFC (N=18). (C) *ASPM* and *NDRG1* in human caudate (N=14, left and middle panels), and *ASPM* in rhesus macaque basal nuclei (N=11, right panel). Genes *MOG*, *MAG*, *OPALIN*, *MBP*, *NDRG1* were not represented in the rhesus macaque dataset in ABA.

Supplementary Figure 4. Deconvolution analysis in BA46. (A) cell type composition for each animal (B) distribution of cell type composition by age group.

Supplementary Figure 5. Deconvolution in caudate. (A) cell type composition for each animal (B) distribution of cell type composition by age group.

Supplementary Figure 6. Deconvolution in hippocampus. (A) cell type composition for each animal (B) distribution of cell type composition by age group.

Supplementary Figure 7. Deconvolution in blood. (A) cell type composition for each animal (B) distribution of cell type composition by age group.

Supplementary Figure 8. Distribution, over 58 vervets, of entropy of cell type, for four tissues.

Supplementary Figure 9. eGene sharing among tissues. The intersection of FDR significant eGenes among the seven tested vervet tissues.

Supplementary Figure 10. Forest plot representing analysis of enrichment of eQTLs in genic and regulatory regions. Log odds-ratio is on the x-axis, and horizontal lines around each estimate represent the 95% confidence interval. Liver Me and Liver Ac stand for, respectively, H3K4me3 and H3K27ac marks in vervet liver. Rhesus caudate Ac and Rhesus prefrontal Ac stand for the vervet orthologous location of H3K27ac epigenetic marks in rhesus macaque caudate and prefrontal cortex, respectively.

Supplementary Figure 11. Increase in the proportion of eQTL SNPs, compared to all SNPs, in the region of the TSS and TES. For each eQTL SNP, we note the location from the SNP to the TSS/TES of the gene to which it was associated. For non-eQTL SNPs, we note the locations of the SNP to the TSS/TES of all genes within 200 Kb of the SNP. Distances to the left and right of the TSS/TES are binned into 10 Kb intervals, and the number of SNPs in each distance bin recorded. As genes are of different sizes, for each gene the interval between the TSS and TES was divided into 10 equally sized intervals. The ratio of the number of eQTL to non-eQTL SNPs was noted for each distance bin. Supplementary Figure 9 represents a summation over the 27,196 genes; a formal statistical analysis of enrichment was not attempted because SNPs were oftentimes within 200kb of the TSS/TES of multiple genes.

Supplementary Figure 1

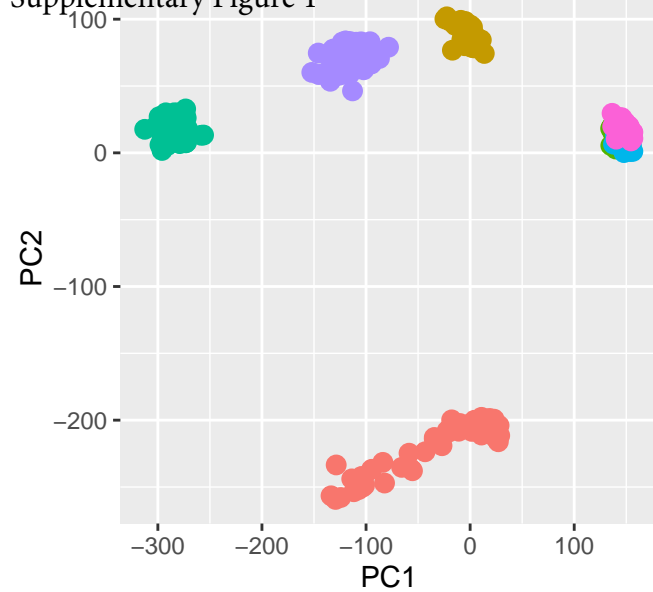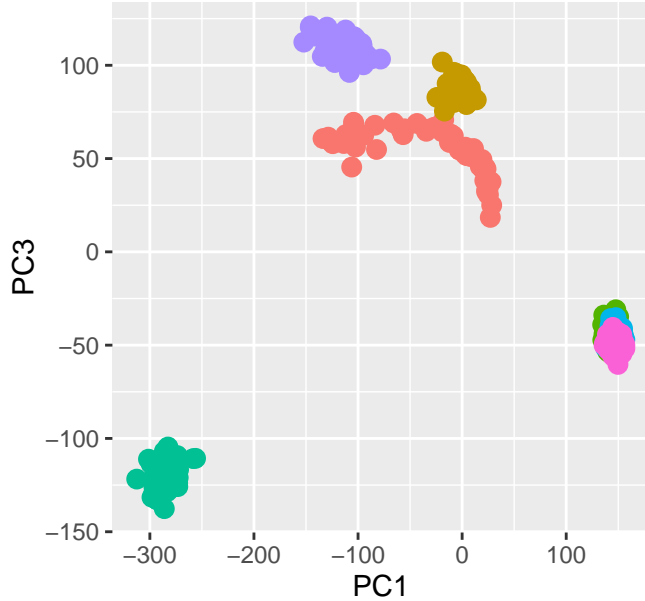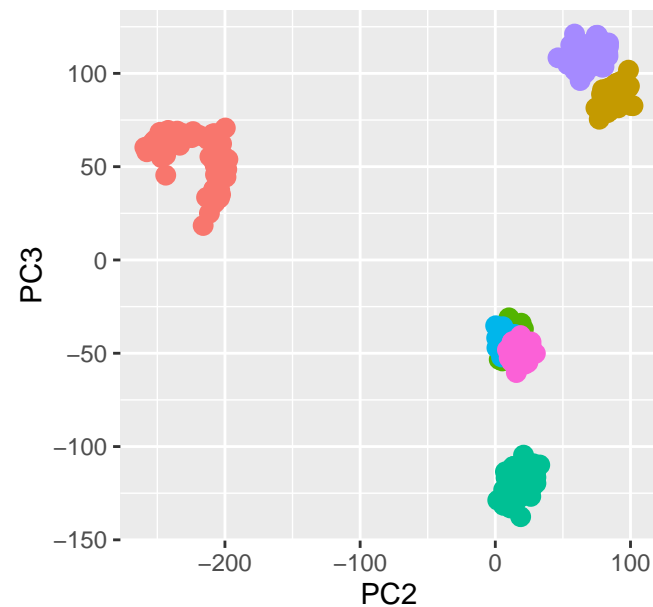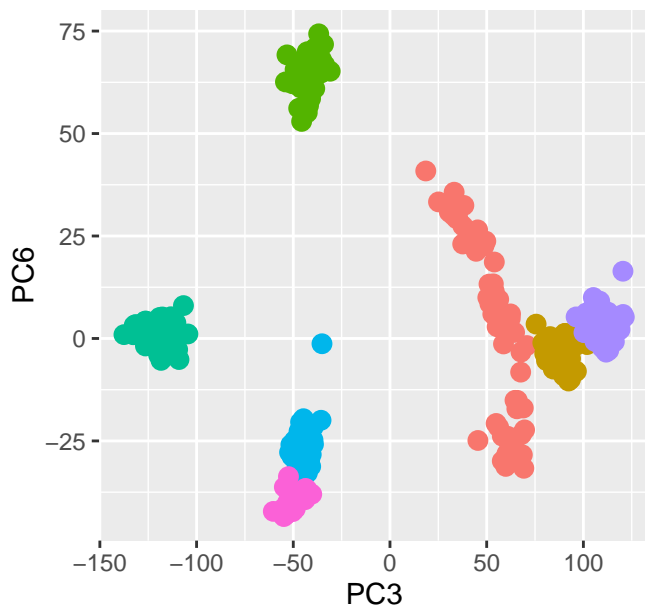

Tissue

|                                                 |                                                |                                                 |                                          |
|-------------------------------------------------|------------------------------------------------|-------------------------------------------------|------------------------------------------|
| <span style="color: red;">●</span> Blood        | <span style="color: green;">●</span> Caudate   | <span style="color: cyan;">●</span> Hippocampus | <span style="color: pink;">●</span> BA46 |
| <span style="color: yellow;">●</span> Pituitary | <span style="color: teal;">●</span> Fibroblast | <span style="color: purple;">●</span> Adrenal   |                                          |

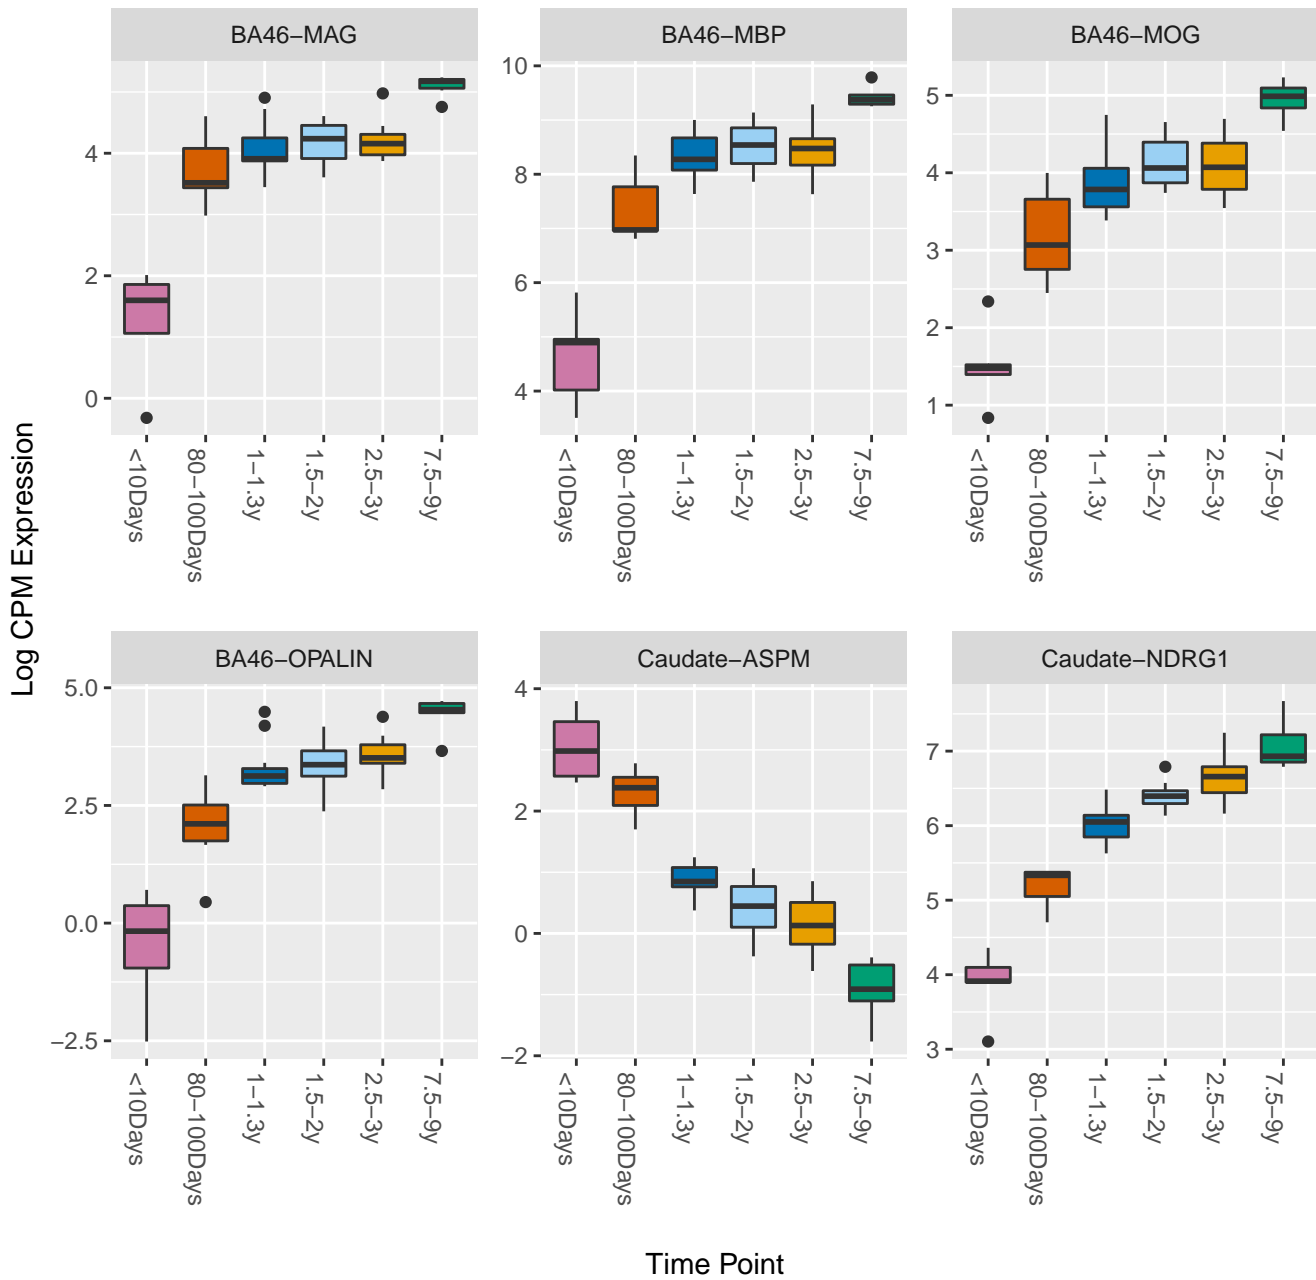

Supplementary Figure 3a **THBS1**

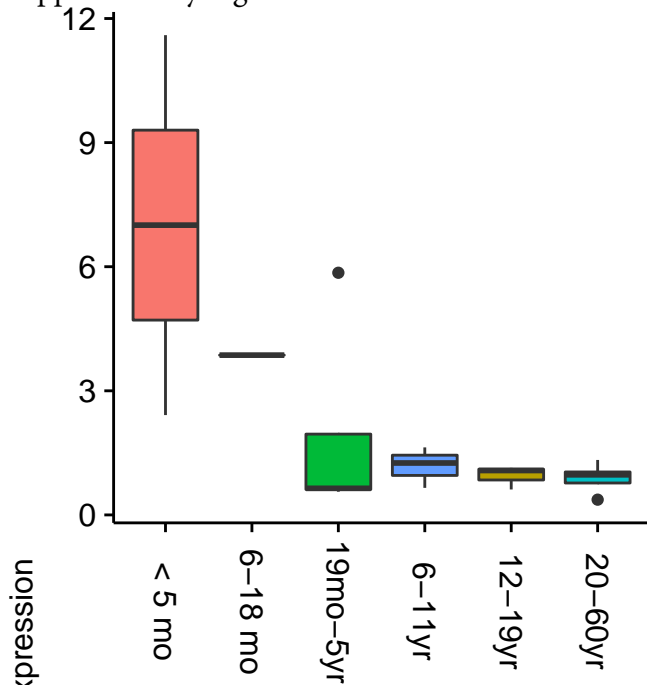

**THBS2**

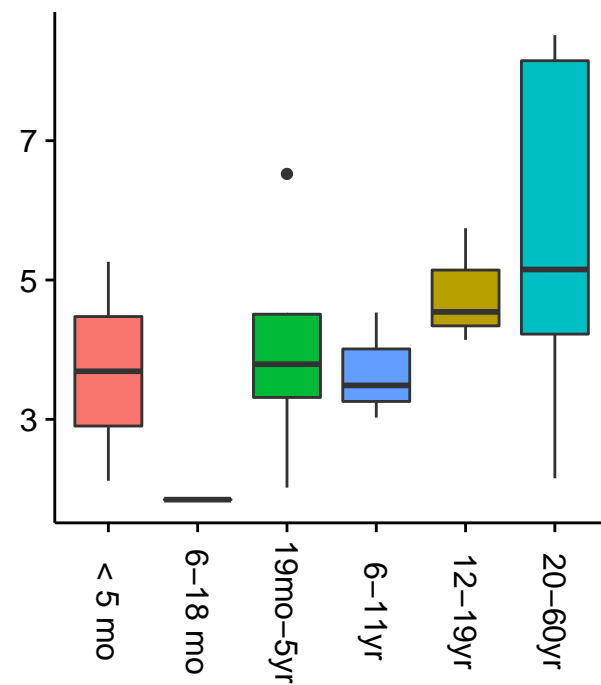

**THBS4**

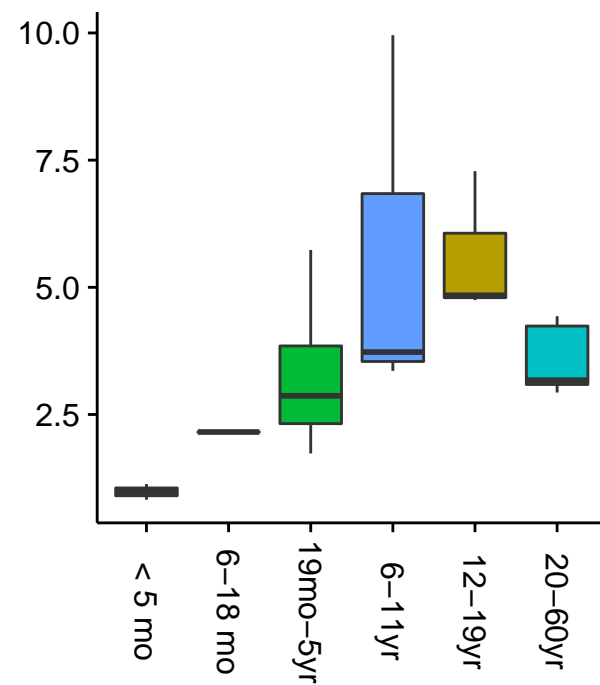

Normalized Expression

**THBS1**

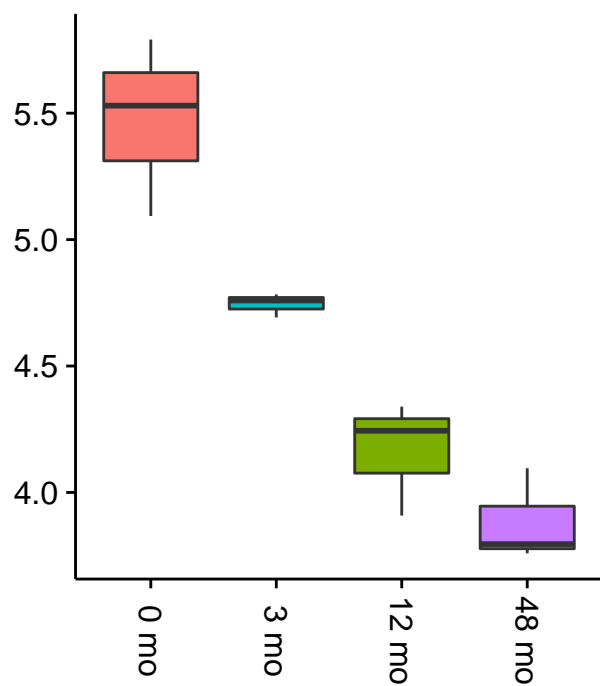

**THBS2**

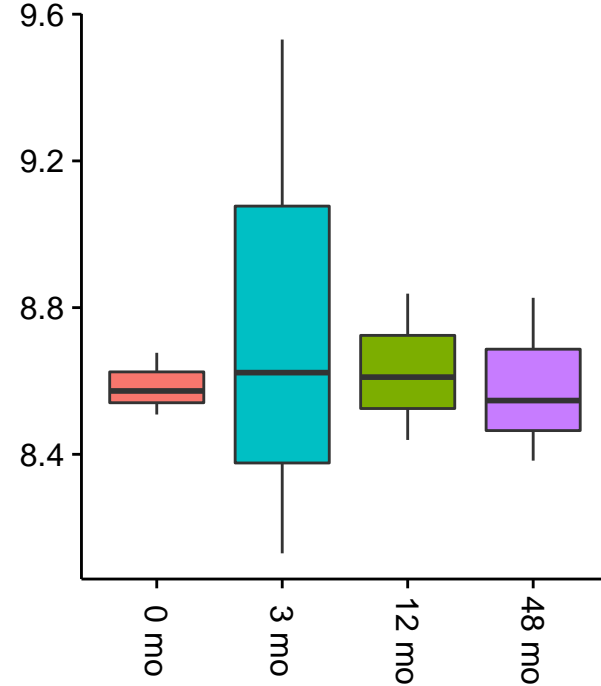

**THBS4**

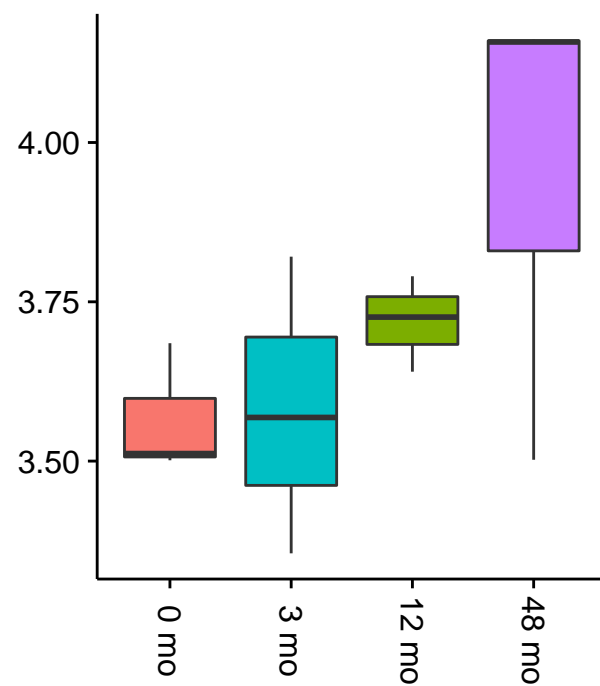

Time Point



Supplementary Figure 3b

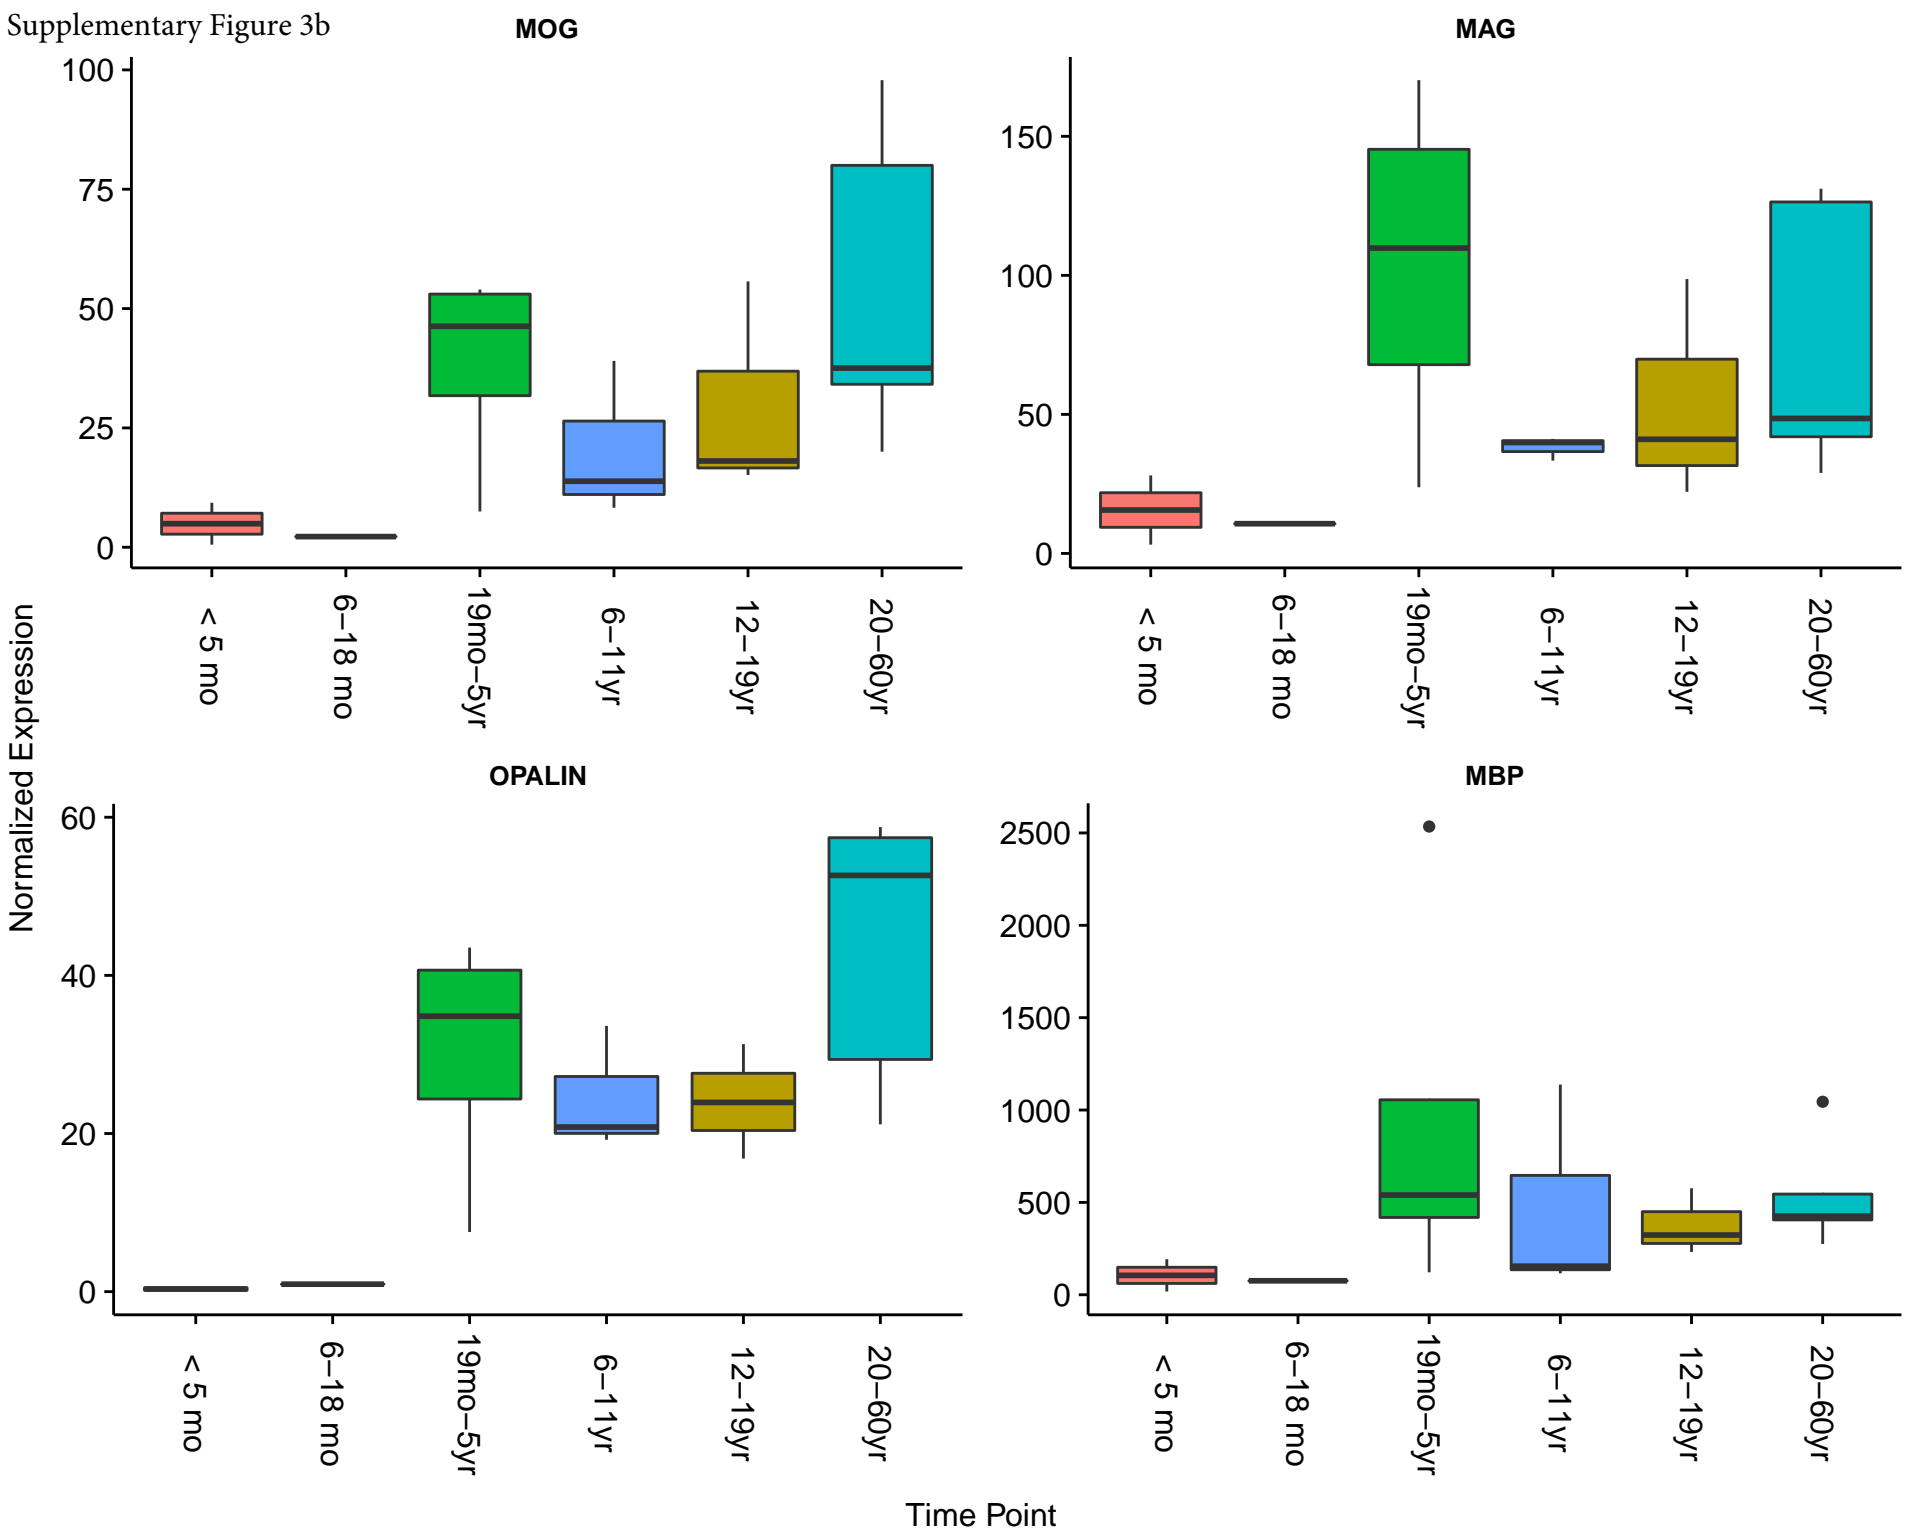

Supplementary Figure 3c

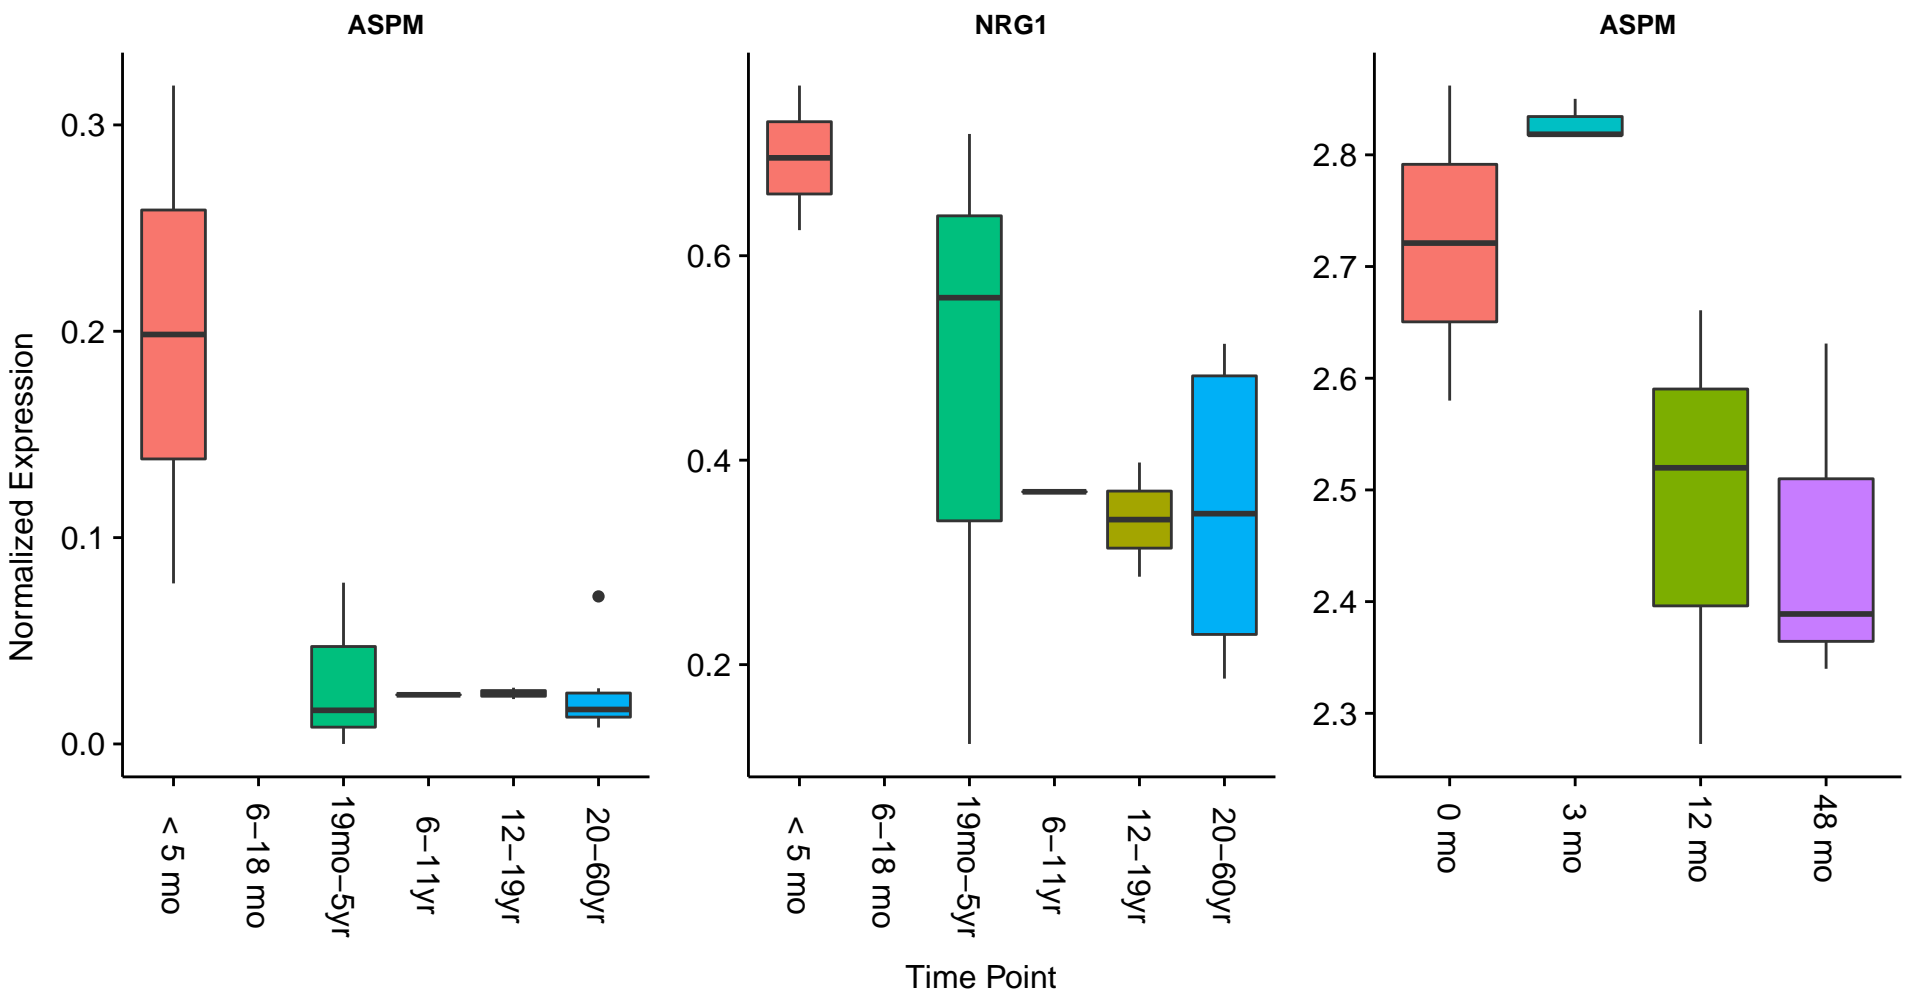

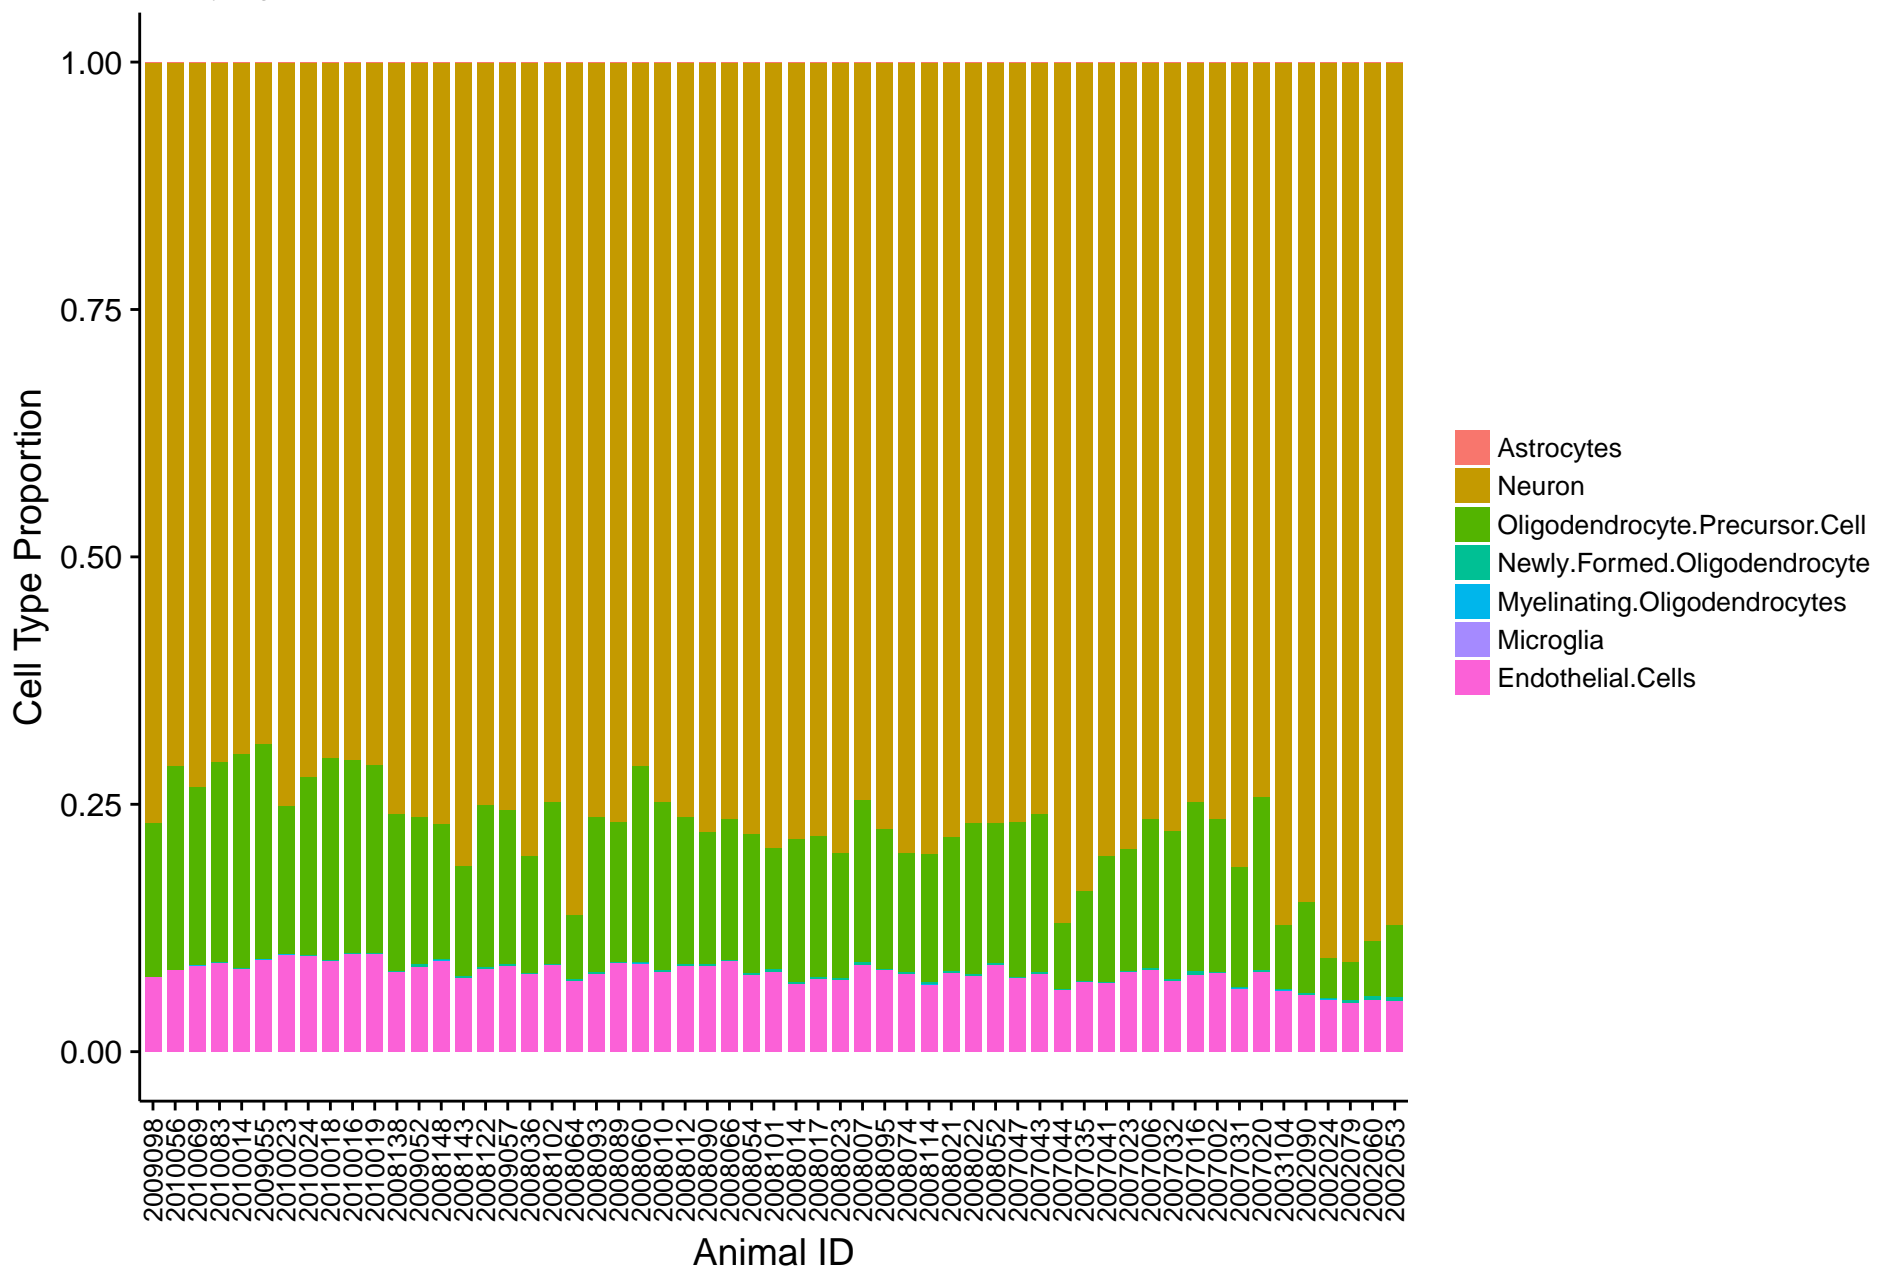

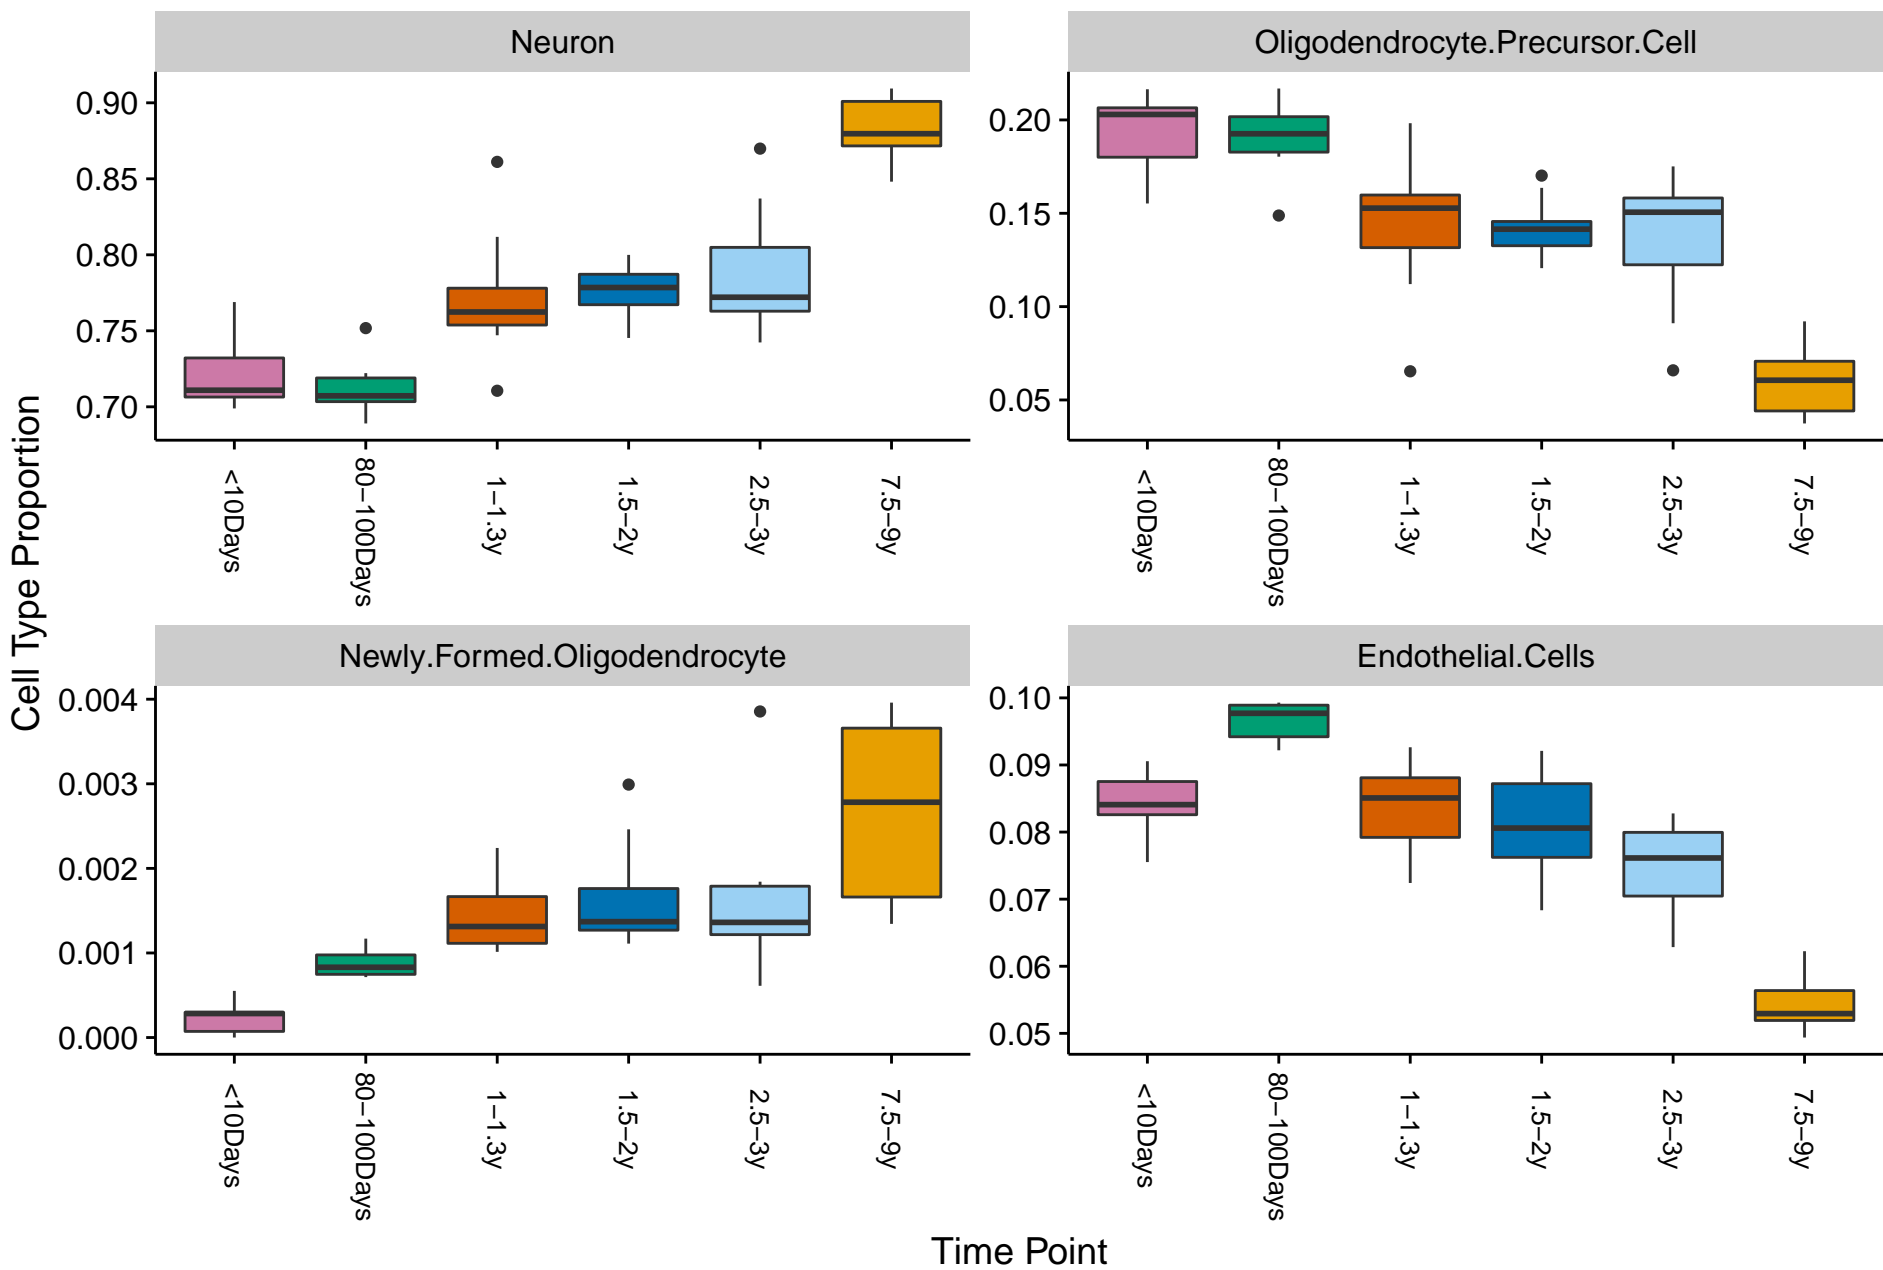

## Caudate

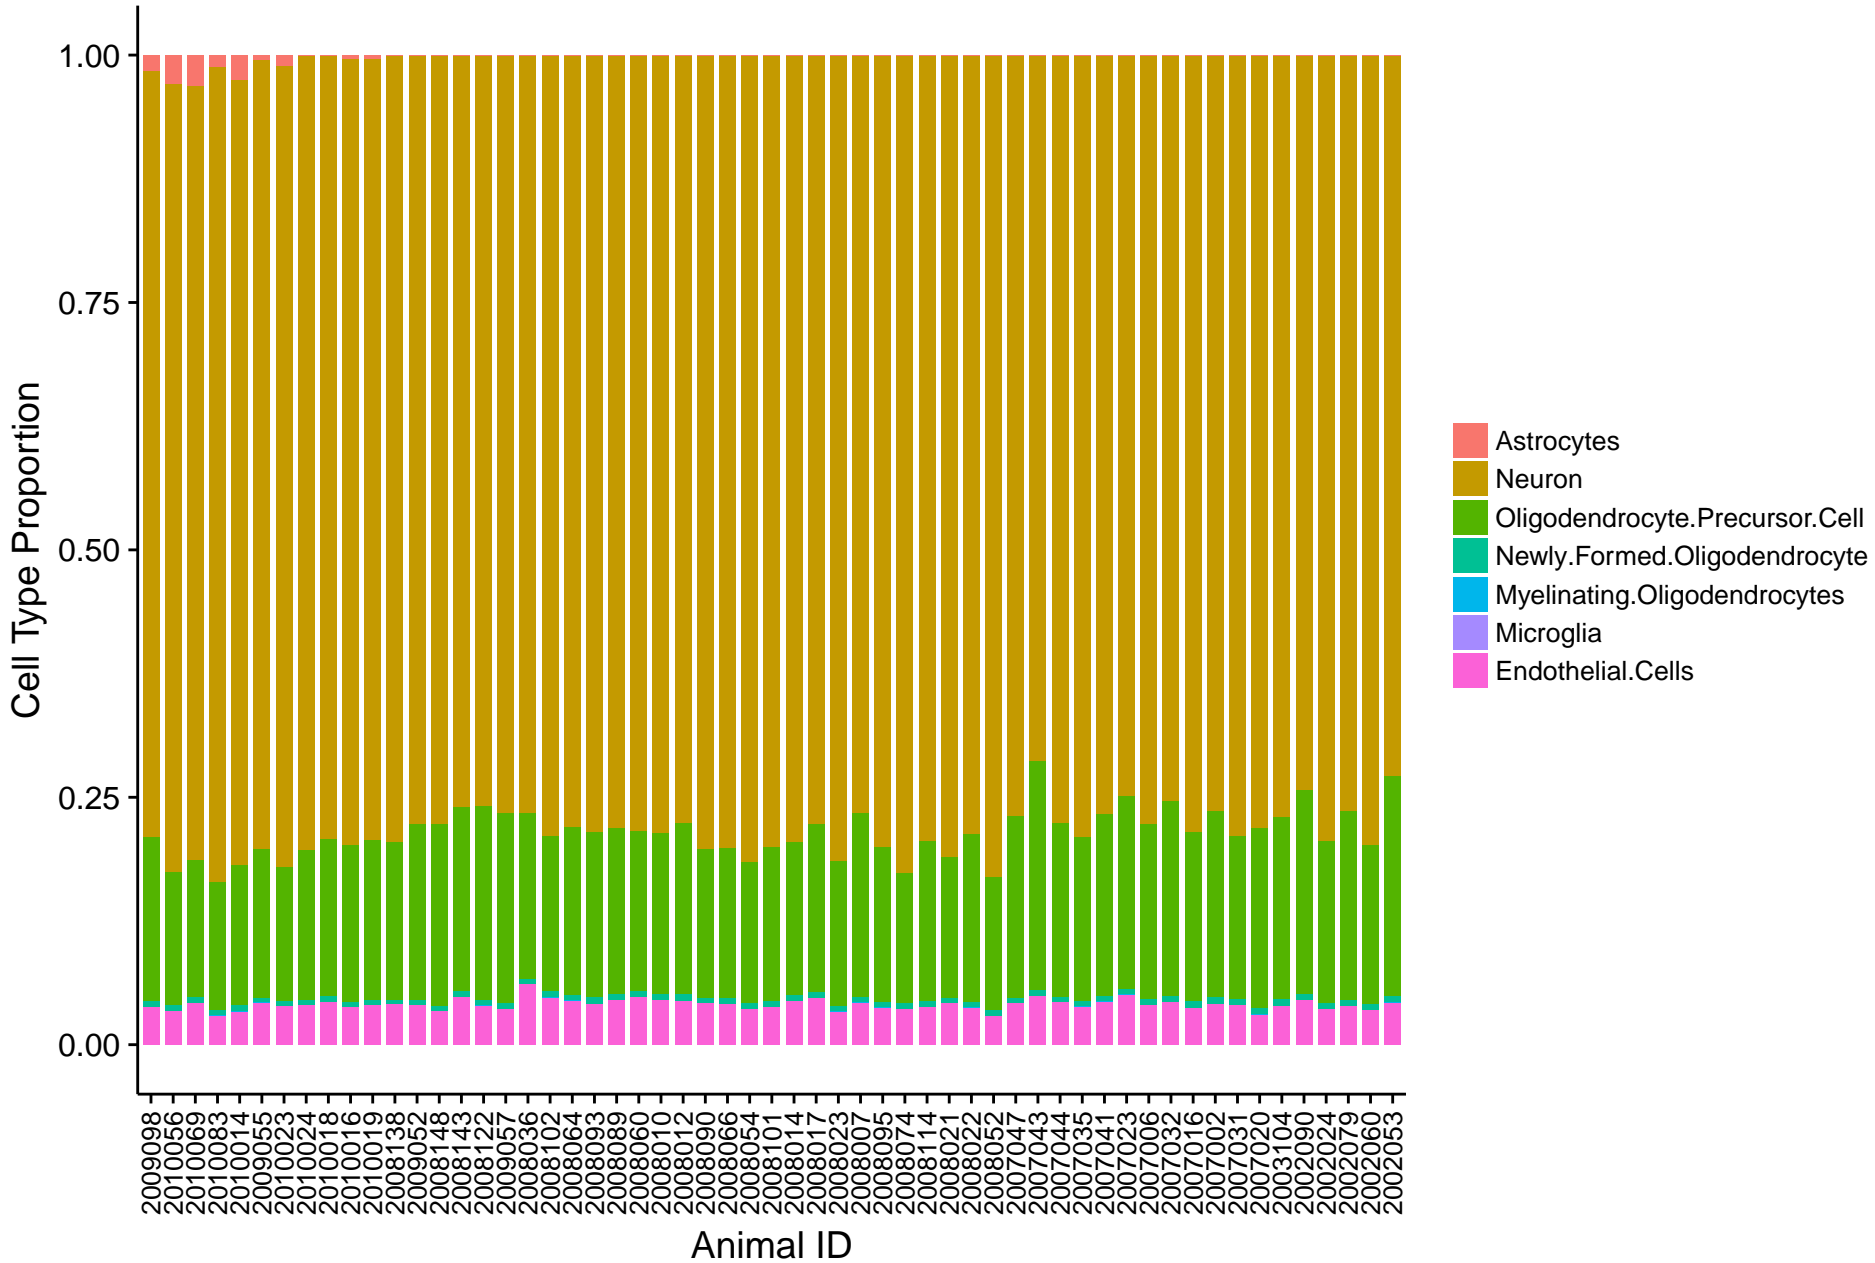

Supplementary Figure 5b

### Caudate

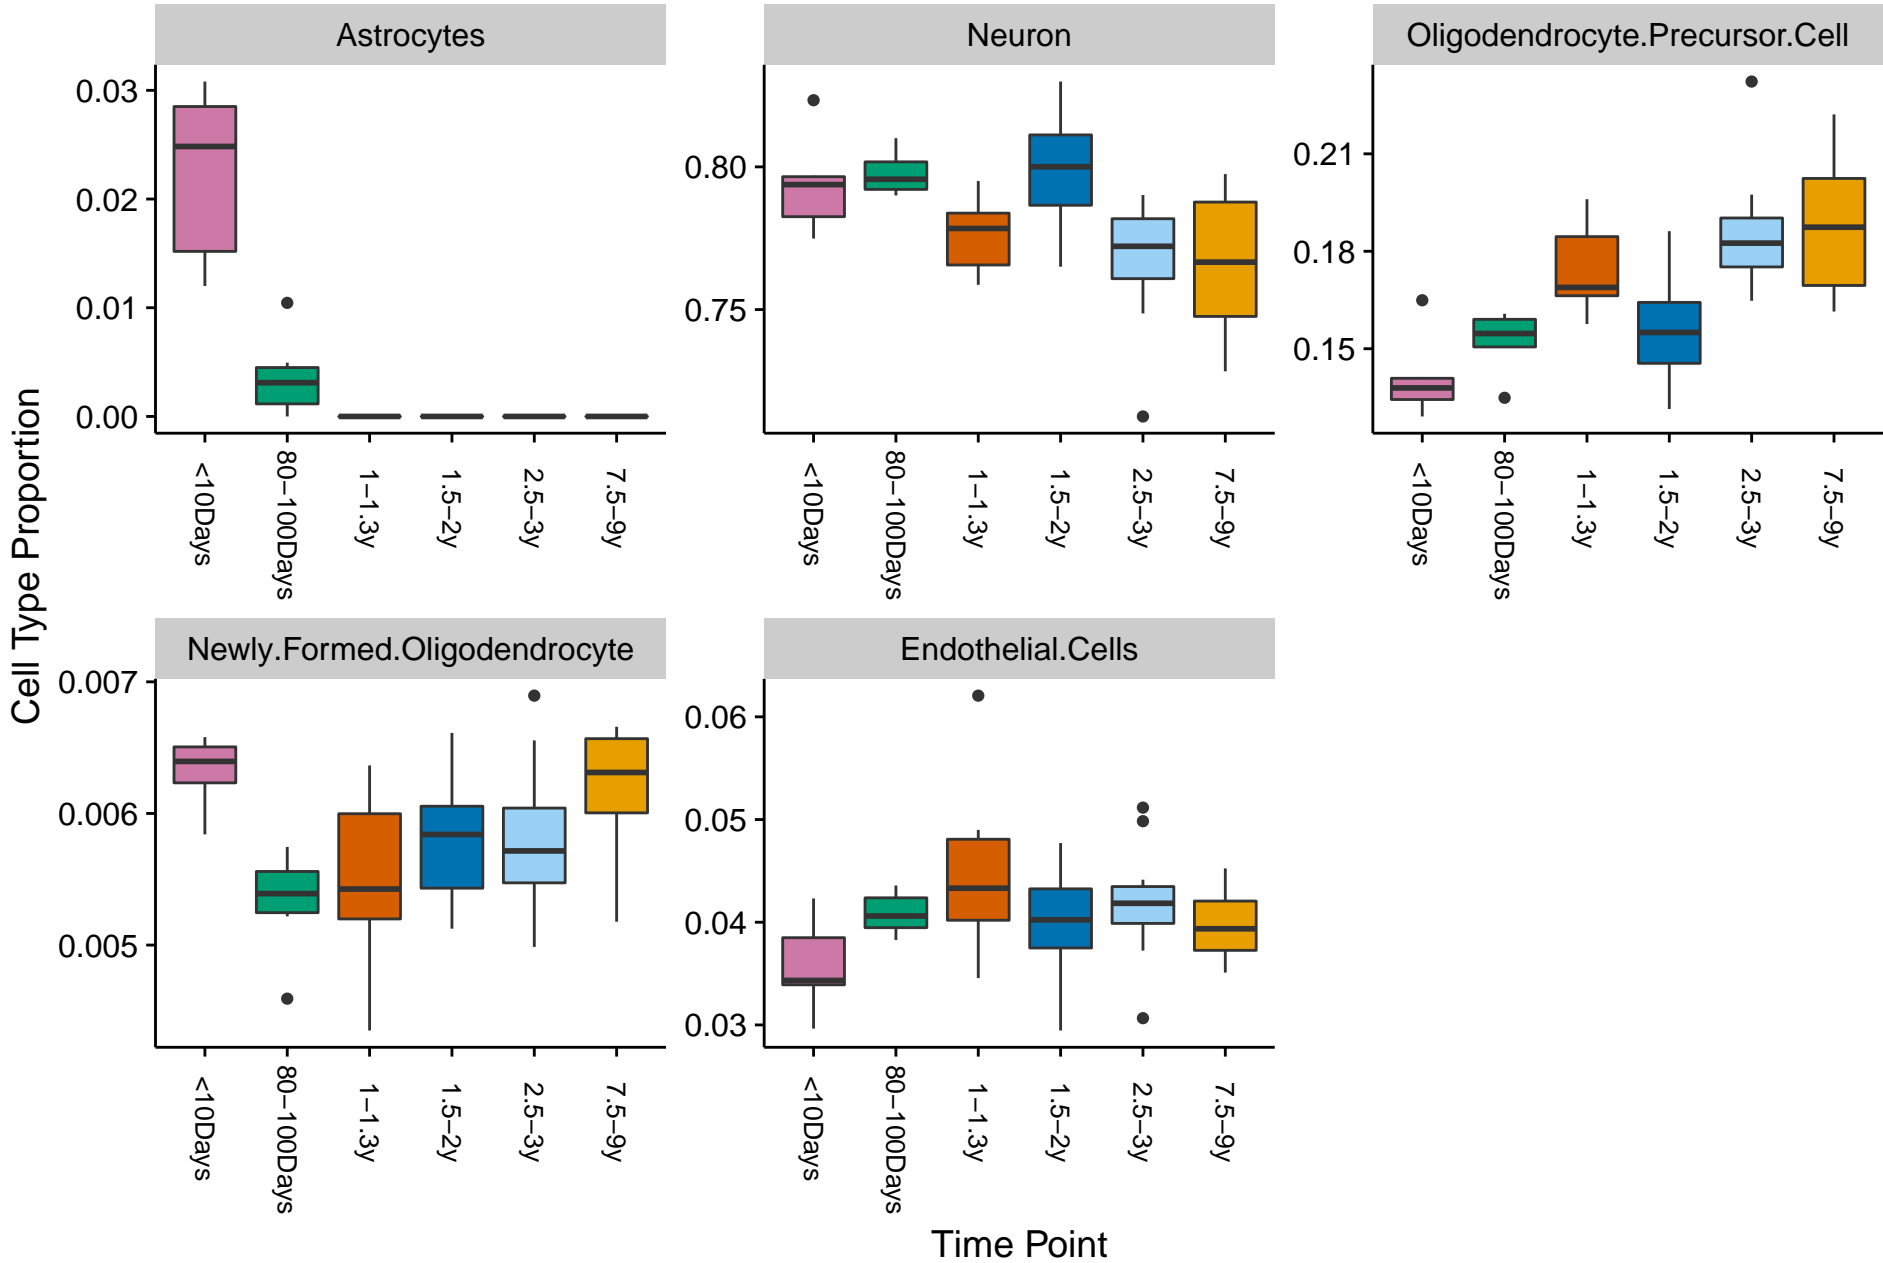

## Hippocampus

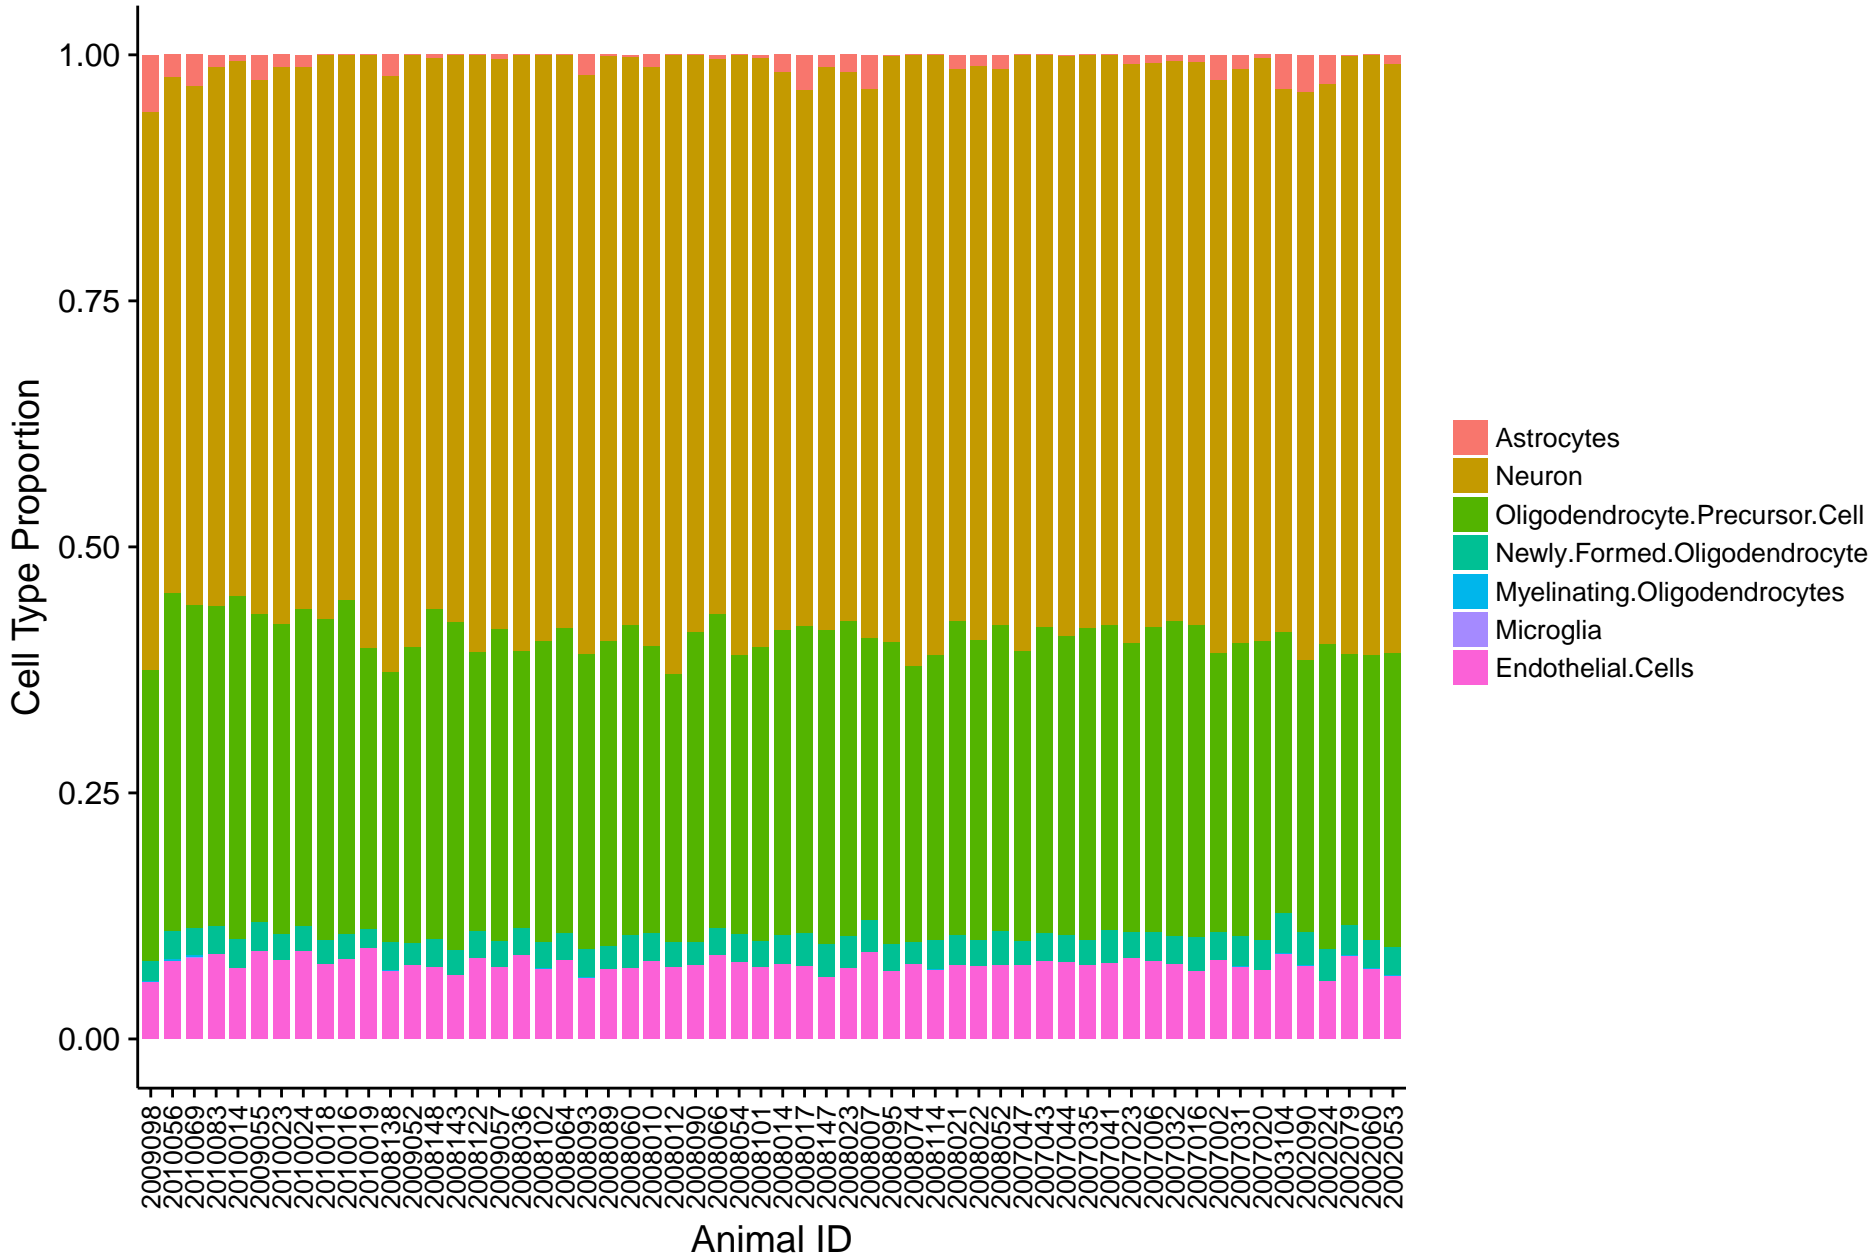

Supplementary Figure 6b

### Hippocampus

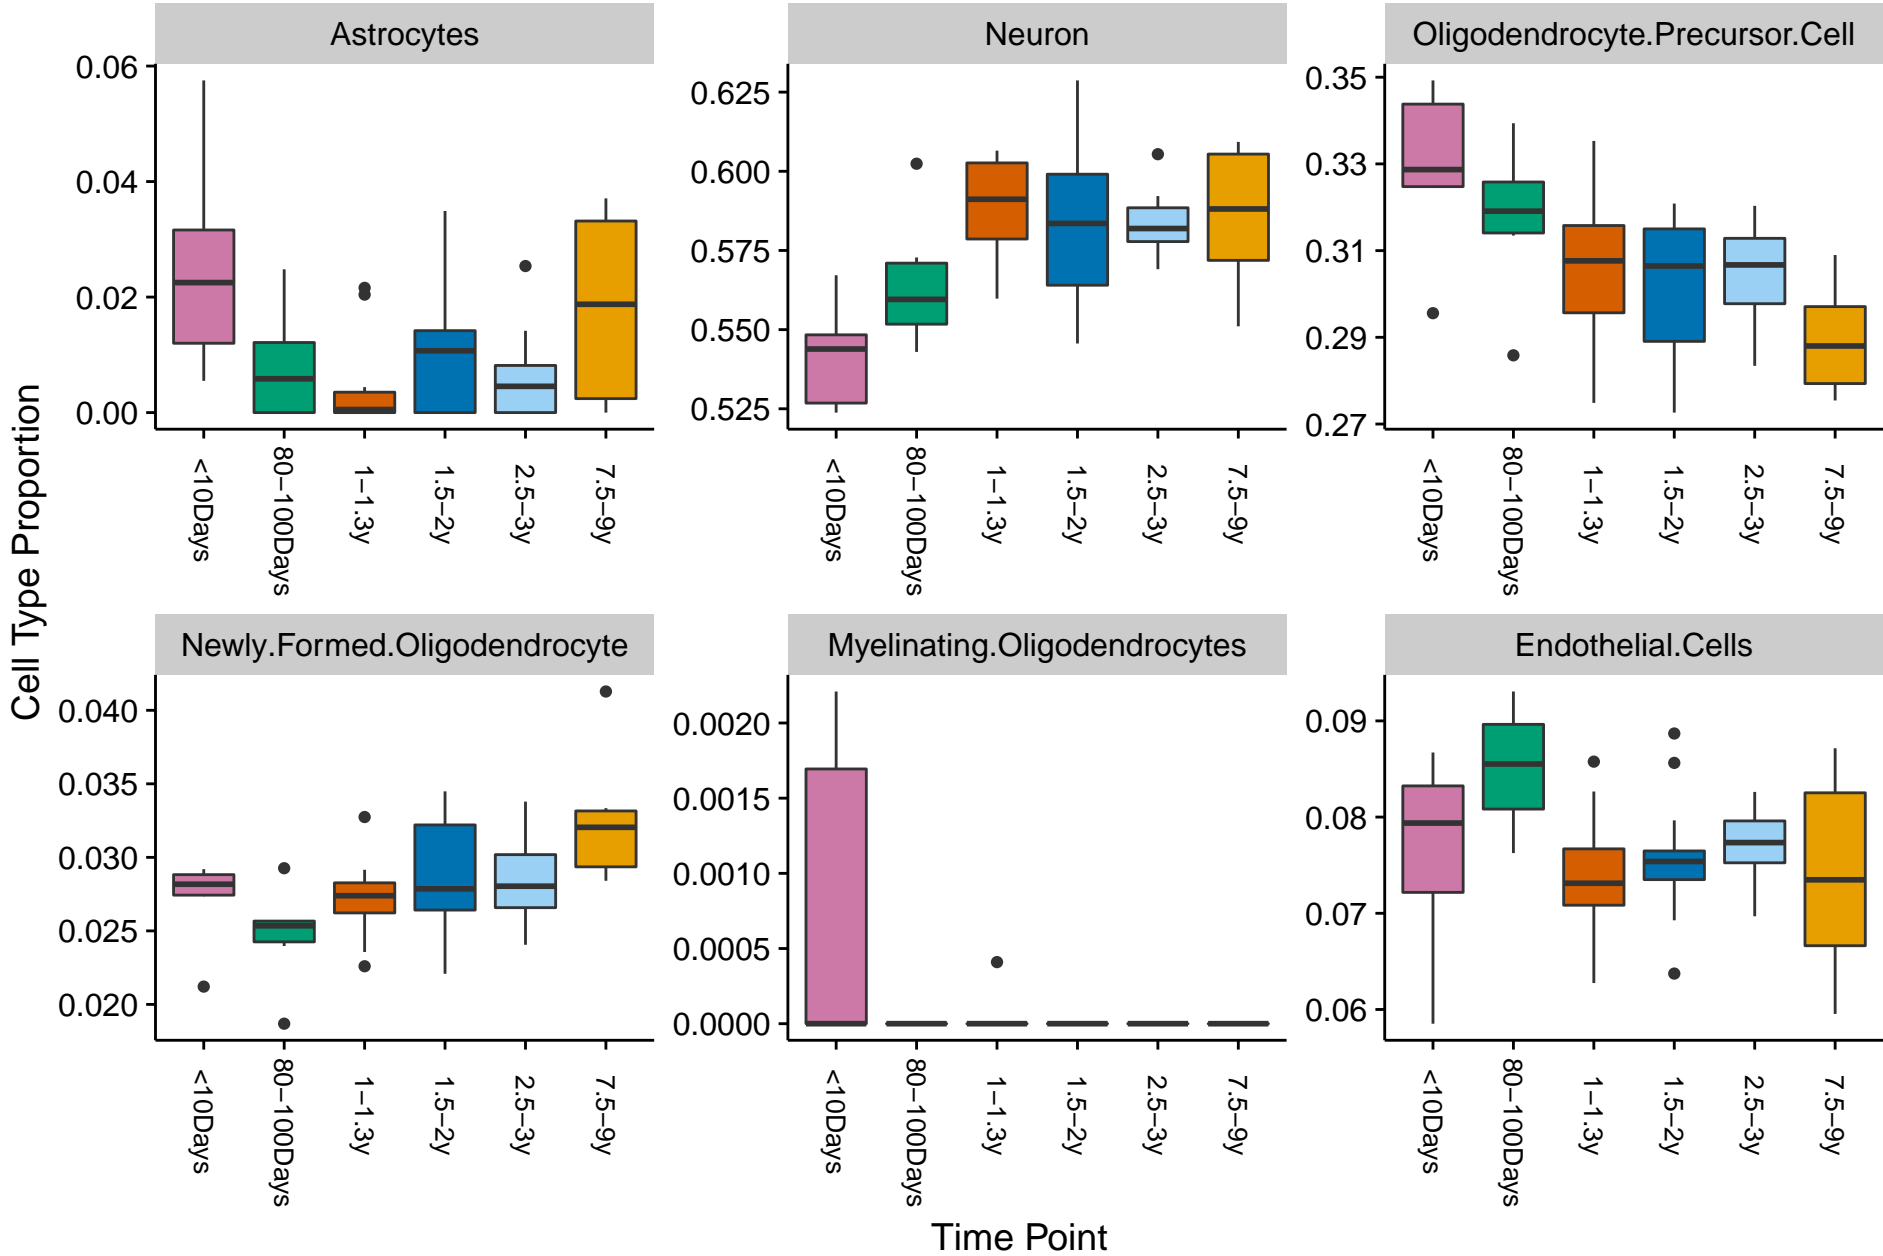

Time Point



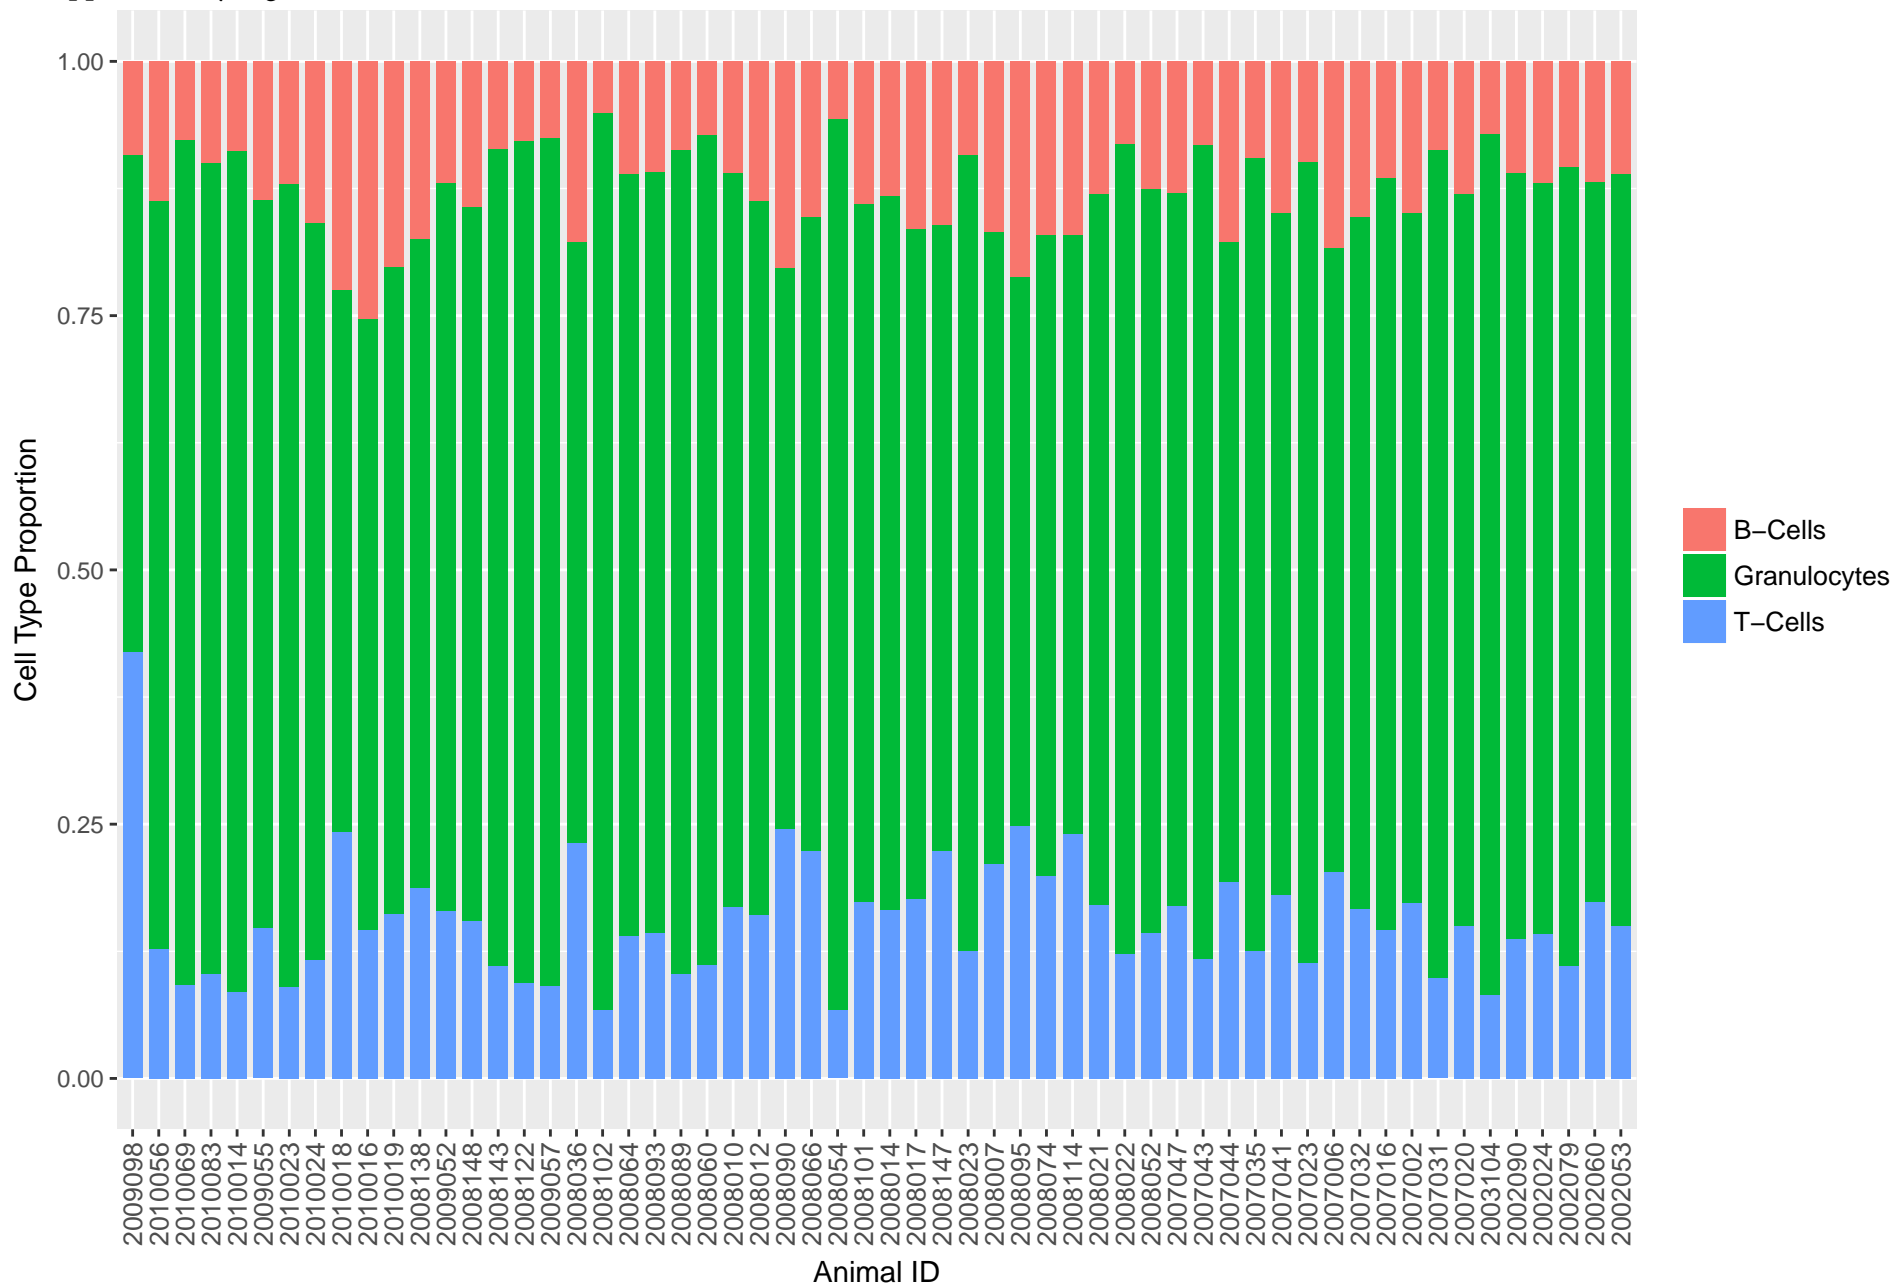

Supplementary Figure 7b

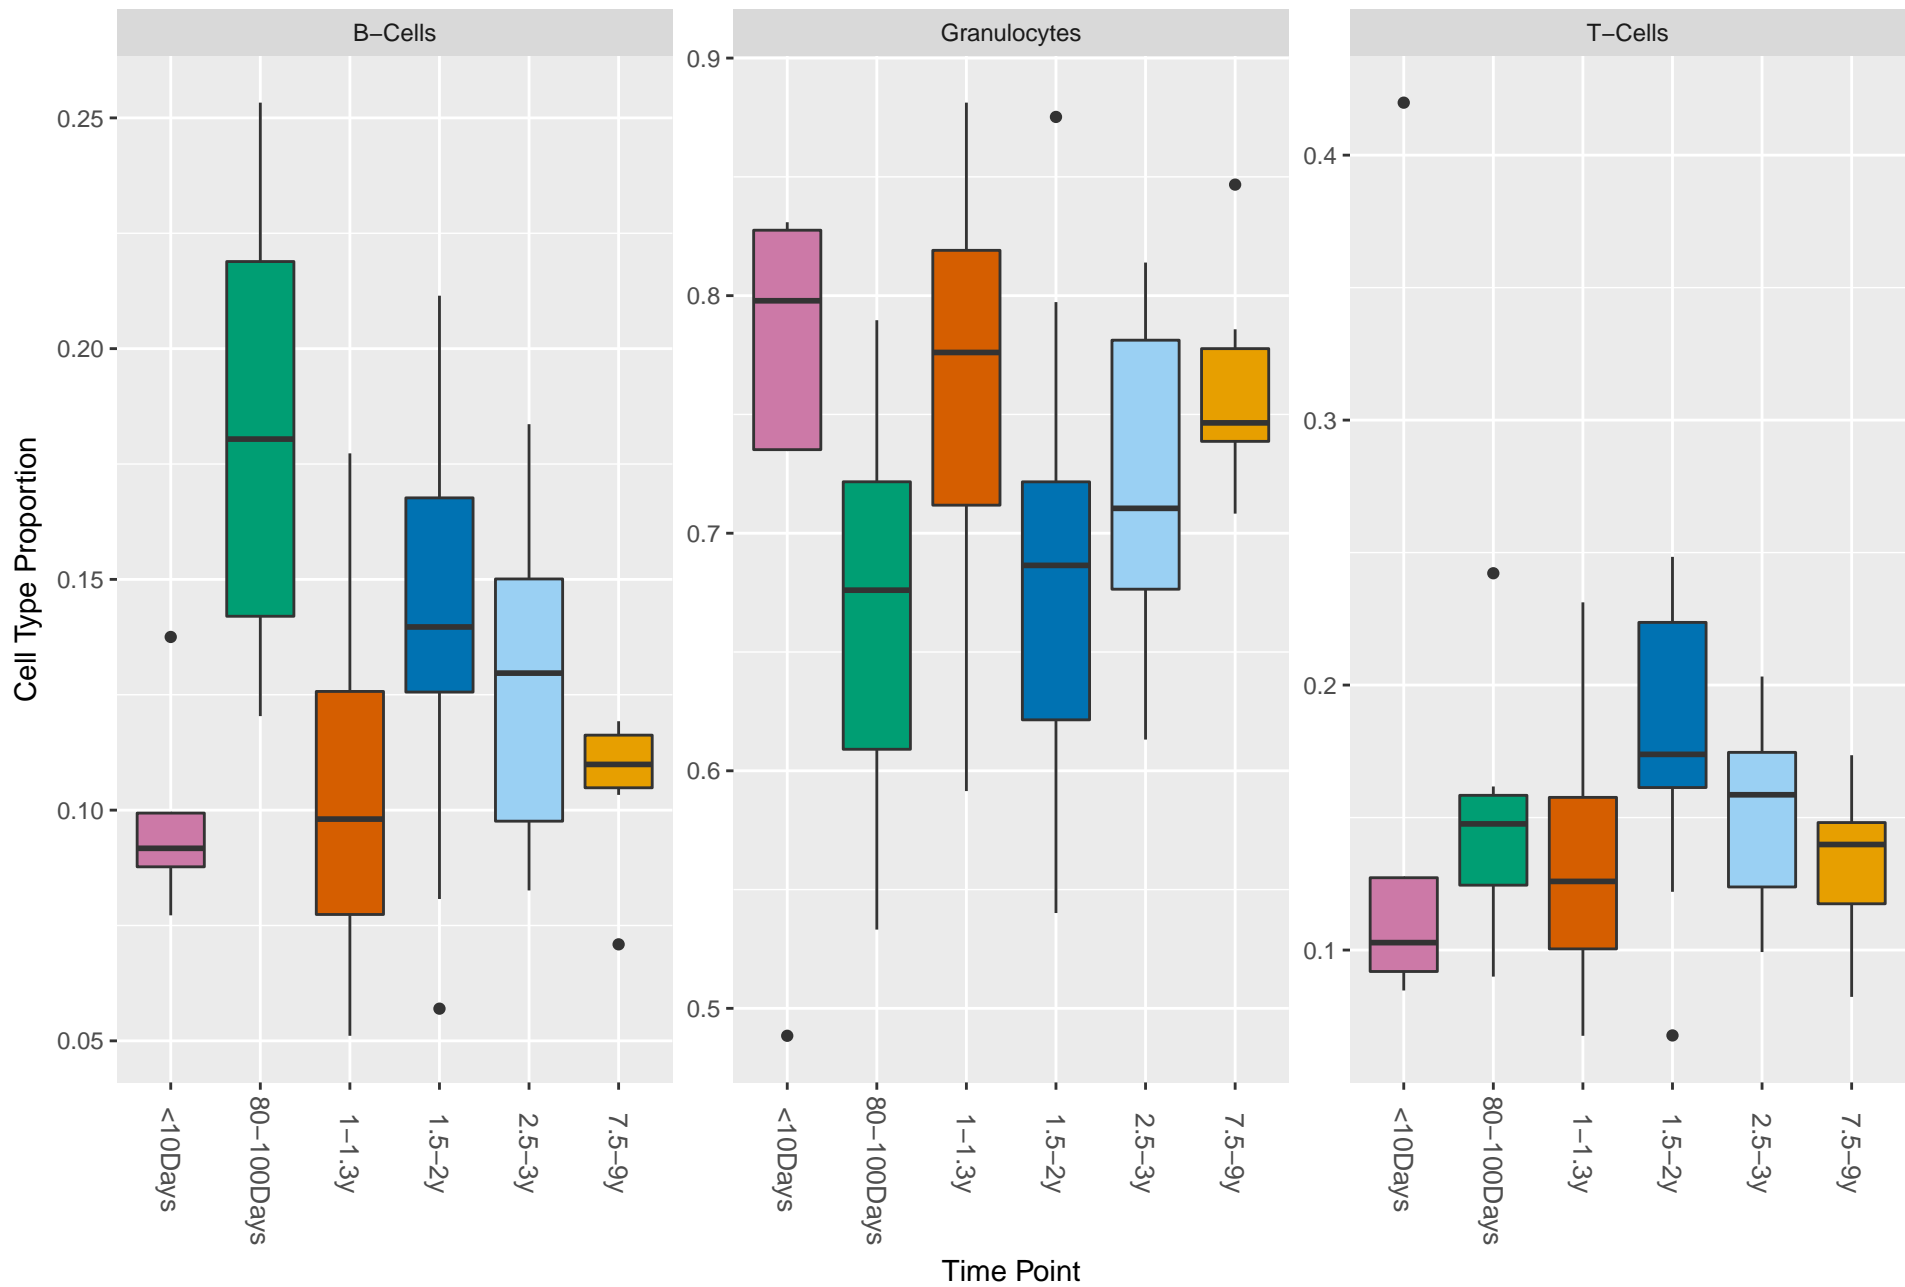

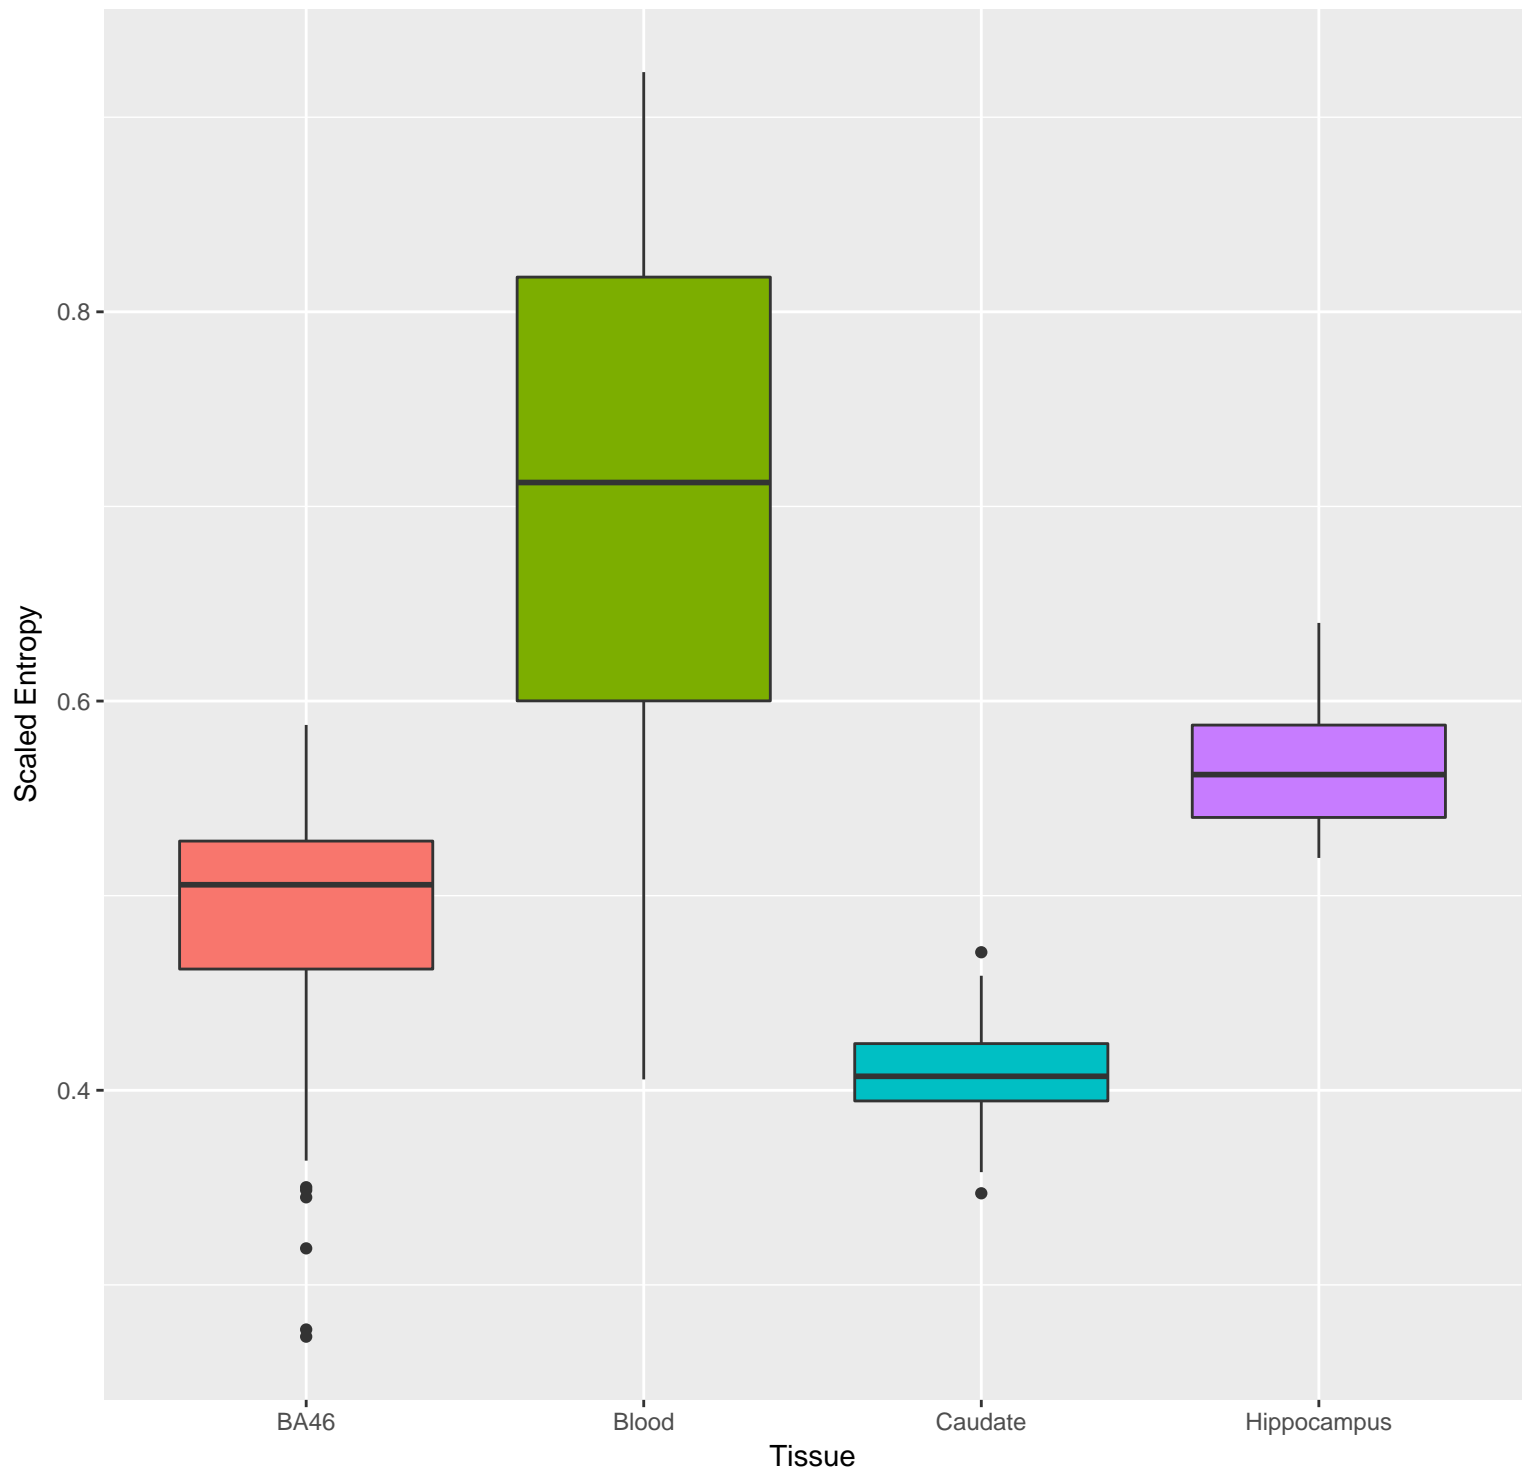

Supplementary Figure 9

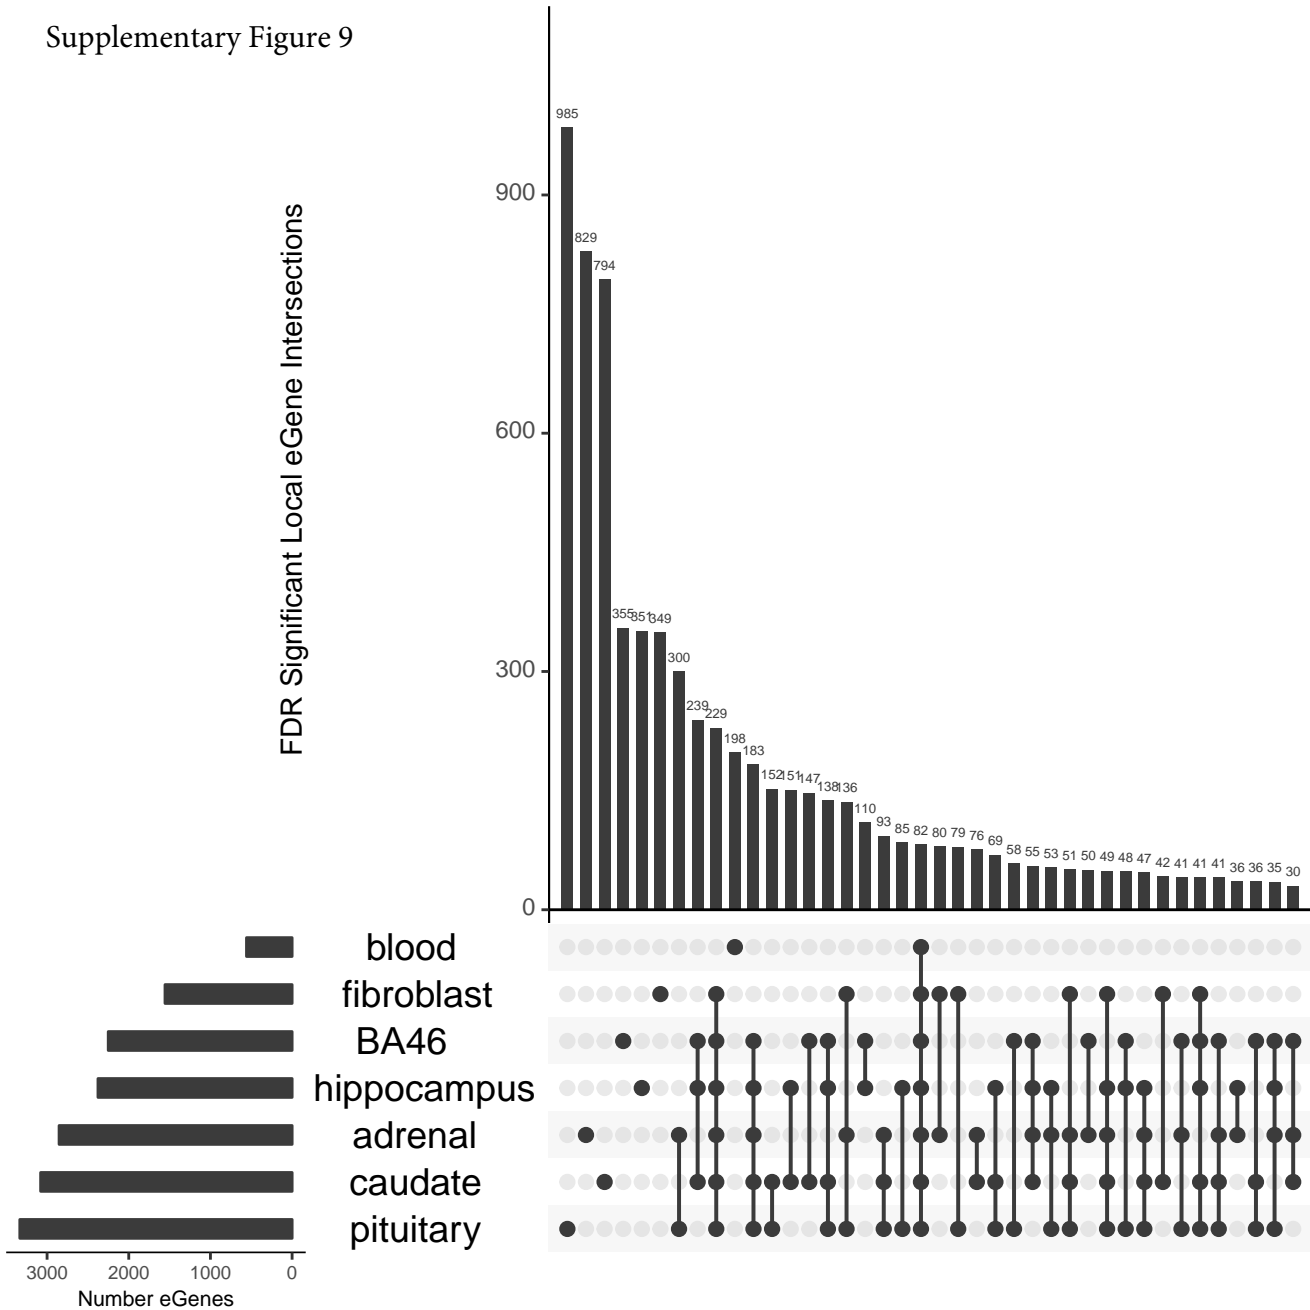

Supplementary Figure 10

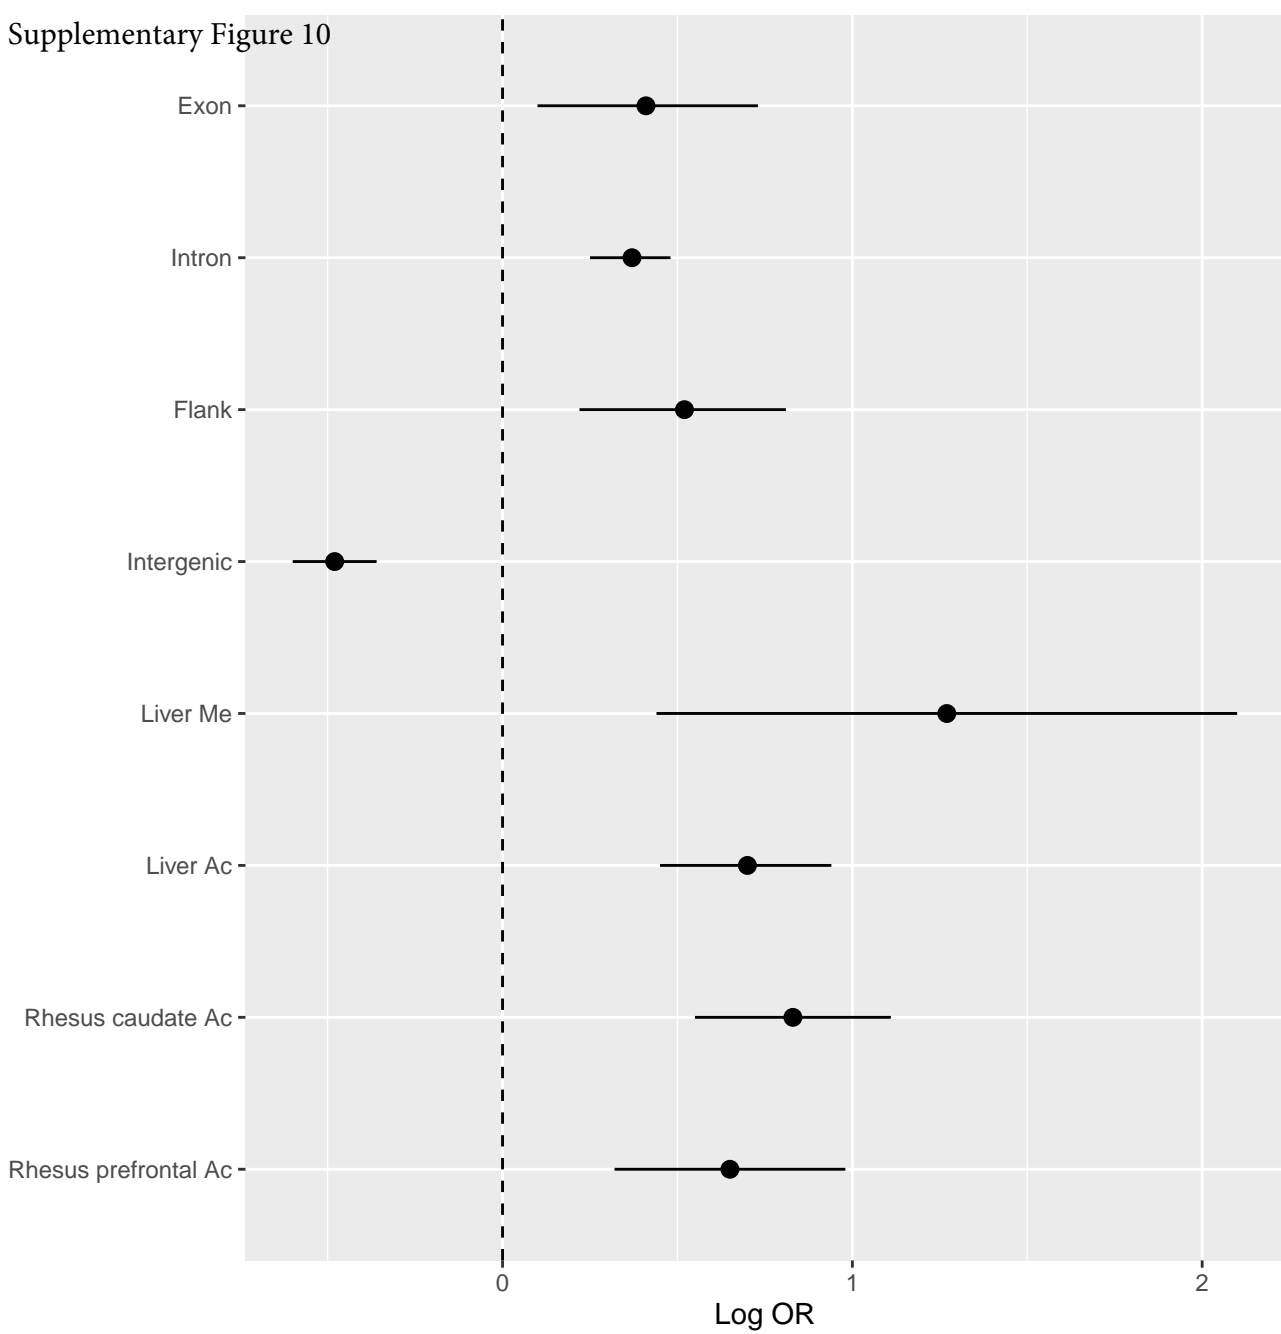

Supplementary Figure 11

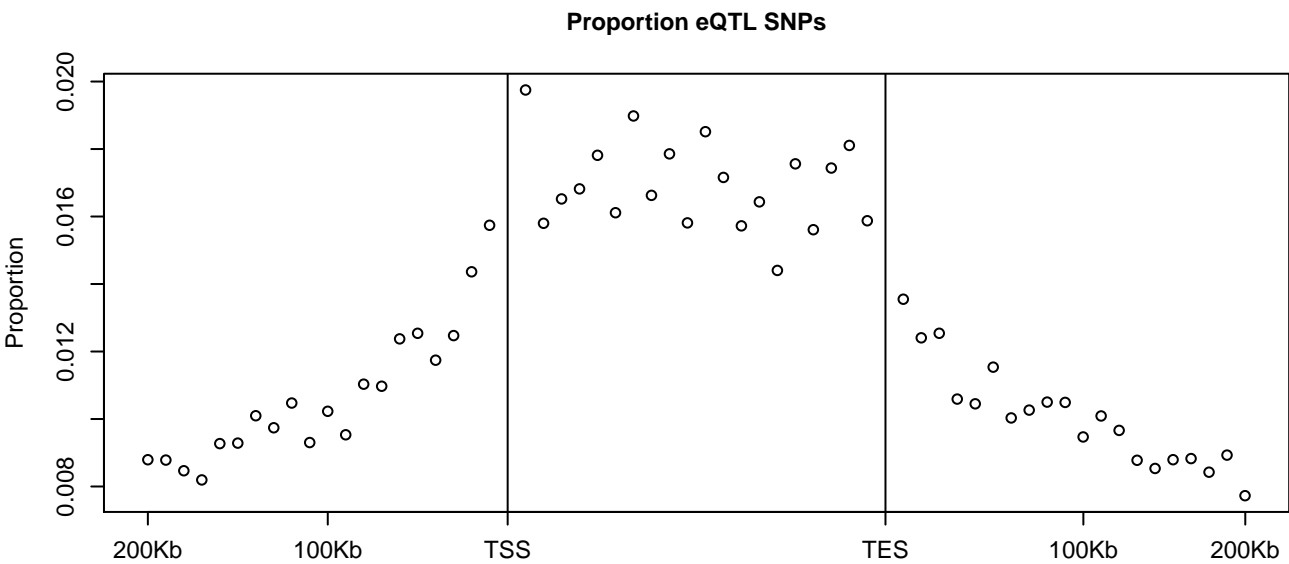

**Supplementary Table 1. Summary of sequential probe filtering steps applied to HumanRef-8v2 array**

| <b>Filtering Step</b>                                     | <b>Number of probes excluded</b> | <b>Number of probes remaining</b> |
|-----------------------------------------------------------|----------------------------------|-----------------------------------|
| Total Number of Probes on HumanRef-8v2                    |                                  | 22,184                            |
| Align to vervet sequence                                  | 3581                             | 18,603                            |
| No indels                                                 | 4837                             | 13,766                            |
| Unique hits to vervet sequence                            | 461                              | 13,305                            |
| Up to 5 mismatches in total probe sequence                | 207                              | 13,098                            |
| Maximum 1 mismatch in central portion of probe            | 1563                             | 11,535                            |
| Presence of common SNPs in probe sequence                 | 434                              | 11,101                            |
| Liftover from scaffold to vervet chromosome               | 100                              | 11,001                            |
| Detected in at least 5% of animals at Illumina $p < 0.05$ | 4983                             | 6,018                             |

**Supplementary Table 2. Biotypes of genes analyzed in Dataset 2**

| <b>Tissue</b> | <b>Protein_Coding</b> | <b>Non_Coding</b> | <b>Pseudo_Gene</b> | <b>Other/Unknown</b> | <b>Total_Genes</b> |
|---------------|-----------------------|-------------------|--------------------|----------------------|--------------------|
| Adrenal       | 18221                 | 3898              | 3036               | 32                   | 25187              |
| BA46          | 18451                 | 5656              | 3393               | 30                   | 27530              |
| Blood         | 20529                 | 8112              | 5093               | 42                   | 33776              |
| Caudate       | 18695                 | 5961              | 3559               | 34                   | 28249              |
| Fibroblast    | 16614                 | 2913              | 2787               | 14                   | 22328              |
| Hippocampus   | 18290                 | 5411              | 3223               | 33                   | 26957              |
| Pituitary     | 18879                 | 4976              | 3344               | 37                   | 27236              |



**Supplementary Table 3. Genes with high expression in one of the seven tissues evaluated with RNA-Seq. Presented are the means per tissue of CPM of TMM normalized count data. References are provided at the bottom of the table.**

| VervetGeneSymbol    | Description                                                    | Adrenal | Blood   | Caudate | Fibroblast | Hippo | Pituitary | BA46   | Max     | Tissue.Max | Gene links to the tissue function*                                                          |
|---------------------|----------------------------------------------------------------|---------|---------|---------|------------|-------|-----------|--------|---------|------------|---------------------------------------------------------------------------------------------|
| <i>LOC103216445</i> | steroid 17-alpha-hydroxylase/17,20 lyase                       | 14036.7 | 1.96902 | 0.96493 | 2.0436848  | 1.045 | 4.24694   | 1.0368 | 14036.7 | Adrenal    |                                                                                             |
| <i>STAR</i>         | steroidogenic acute regulatory protein                         | 10620.4 | 1.75588 | 0.99425 | 1.3615424  | 0.829 | 3.60259   | 0.8475 | 10620.4 | Adrenal    | a role in steroidogenesis in adrenals <sup>1</sup>                                          |
| <i>LOC103237546</i> | cytochrome P450 11B1, mitochondrial                            | 5682.77 | 1.17149 | 0.06733 | 0.7601465  | 0.088 | 1.56708   | 0.079  | 5682.77 | Adrenal    |                                                                                             |
| <i>LOC103245339</i> | cholesterol side-chain cleavage enzyme, mitochondrial          | 5274.27 | 1.83883 | 1.41084 | 0.8371132  | 0.479 | 5.55669   | 0.3911 | 5274.27 | Adrenal    |                                                                                             |
| <i>LOC103224109</i> | 3 beta-hydroxysteroid dehydrogenase/Delta 5->4-isome           | 4620.16 | 1.02853 | 0.17528 | 0.6648728  | 0.13  | 1.60302   | 0.1659 | 4620.16 | Adrenal    |                                                                                             |
| <i>LOC103221724</i> | steroid 21-hydroxylase                                         | 4614.96 | 0.98424 | 0.37278 | 0.6002827  | 0.375 | 2.22281   | 0.2324 | 4614.96 | Adrenal    |                                                                                             |
| <i>LOC103221358</i> | glutathione S-transferase A3                                   | 2378.28 | 1.078   | 0.05385 | 0.3126857  | 0.033 | 0.83506   | 0.0281 | 2378.28 | Adrenal    |                                                                                             |
| <i>LOC103237547</i> | cytochrome P450 11B1, mitochondrial-like                       | 1497.27 | 1.34717 | 0.08066 | 0.2068515  | 0.046 | 0.40351   | 0.0706 | 1497.27 | Adrenal    |                                                                                             |
| <i>LOC103221720</i> | tenascin-X-like                                                | 1099.93 | 0.96596 | 0.62226 | 0.714856   | 0.665 | 1.12399   | 0.8683 | 1099.93 | Adrenal    |                                                                                             |
| <i>LOC103221719</i> | steroid 21-hydroxylase-like                                    | 1080.27 | 0.48447 | 0.02674 | 0.1298478  | 0.02  | 0.29704   | 0.0172 | 1080.27 | Adrenal    |                                                                                             |
| <i>SERPINA5</i>     | serpin peptidase inhibitor, clade A (alpha-1 antiproteinase, i | 969.736 | 5.01123 | 0.32745 | 0.1265797  | 0.653 | 8.77306   | 0.2177 | 969.736 | Adrenal    | role in adrenal gland development and steroidogenesis <sup>2</sup>                          |
| <i>MC2R</i>         | melanocortin 2 receptor (adrenocorticotrophic hormone)         | 677.134 | 1.49872 | 0.03163 | 0.0990165  | 0.024 | 0.66854   | 0.0143 | 677.134 | Adrenal    |                                                                                             |
| <i>LOC103221721</i> | serine/threonine-protein kinase 19-like                        | 397.149 | 0.34683 | 0.02677 | 0.048376   | 0.029 | 0.1449    | 0.0459 | 397.149 | Adrenal    |                                                                                             |
| <i>AVPR1A</i>       | arginine vasopressin receptor 1A                               | 351.362 | 0.99528 | 0.24922 | 0.0540573  | 0.69  | 0.55493   | 2.2969 | 351.362 | Adrenal    | regulation of aldosterone secretion <sup>3</sup> , in brain (mostly in septal nucleus), V1A |
| <i>KRT80</i>        | keratin 80                                                     | 338.73  | 2.54884 | 0.03079 | 1.7058982  | 0.106 | 2.003     | 2.2695 | 338.73  | Adrenal    |                                                                                             |
| <i>SERPINF2</i>     | serpin peptidase inhibitor, clade F (alpha-2 antiplasmin, pigr | 293.858 | 2.14206 | 0.07687 | 2.2143439  | 0.667 | 2.2331    | 0.1015 | 293.858 | Adrenal    |                                                                                             |
| <i>VTN</i>          | vitronectin                                                    | 252.728 | 2.08564 | 2.89347 | 0.3577577  | 1.99  | 3.84988   | 2.6754 | 252.728 | Adrenal    |                                                                                             |
| <i>PON3</i>         | paraoxonase 3                                                  | 225.041 | 1.10187 | 2.12092 | 0.3979202  | 1.415 | 3.318     | 1.1356 | 225.041 | Adrenal    |                                                                                             |
| <i>LOC103236010</i> | alcohol dehydrogenase 1C                                       | 195.564 | 1.90079 | 0.10949 | 0.0388765  | 0.065 | 2.23227   | 0.0536 | 195.564 | Adrenal    |                                                                                             |
| <i>HOXA5</i>        | homeobox A5                                                    | 183.006 | 1.14667 | 0.00291 | 5.3960996  | 0.007 | 0.06456   | 0.0028 | 183.006 | Adrenal    |                                                                                             |
| <i>MAP3K15</i>      | mitogen-activated protein kinase kinase kinase 15              | 180.401 | 9.59698 | 6.3744  | 0.5891424  | 7.887 | 2.66232   | 5.8447 | 180.401 | Adrenal    |                                                                                             |
| <i>LOC103221726</i> | uncharacterized LOC103221726                                   | 170.991 | 0.60676 | 0.26157 | 0.0586167  | 0.241 | 0.31083   | 0.2392 | 170.991 | Adrenal    |                                                                                             |
| <i>RGN</i>          | regucalcin                                                     | 170.15  | 1.14789 | 4.02933 | 0.0795482  | 6.108 | 7.38139   | 4.5735 | 170.15  | Adrenal    |                                                                                             |
| <i>LRRC38</i>       | leucine rich repeat containing 38                              | 167.802 | 1.05419 | 0.20054 | 0.030719   | 0.042 | 0.65828   | 0.7031 | 167.802 | Adrenal    |                                                                                             |
| <i>MRAP</i>         | melanocortin 2 receptor accessory protein                      | 154.064 | 1.18998 | 0.66305 | 0.2422359  | 0.572 | 0.28949   | 0.6347 | 154.064 | Adrenal    |                                                                                             |
| <i>CHAD</i>         | chondroadherin                                                 | 150.751 | 4.50058 | 2.47324 | 0.2957742  | 2.163 | 7.87485   | 2.5129 | 150.751 | Adrenal    |                                                                                             |
| <i>RBP5</i>         | retinol binding protein 5, cellular                            | 147.506 | 1.05587 | 0.87473 | 0.2071491  | 0.38  | 1.28551   | 0.8882 | 147.506 | Adrenal    |                                                                                             |
| <i>LOC103225291</i> | hemoglobin subunit alpha                                       | 0.99532 | 34787.8 | 3.05125 | 0.2085443  | 0.991 | 9.02605   | 0.6743 | 34787.8 | Blood      |                                                                                             |
| <i>ALAS2</i>        | aminolevulinate, delta-, synthase 2                            | 0.15539 | 14948.3 | 1.41916 | 0.1541252  | 0.175 | 2.86073   | 0.1311 | 14948.3 | Blood      |                                                                                             |
| <i>LOC103247904</i> | hemoglobin subunit gamma-1                                     | 0.81707 | 14228   | 3.11984 | 0.3912939  | 0.179 | 1.11515   | 0.1328 | 14228   | Blood      |                                                                                             |
| <i>C5</i>           | complement component 5                                         | 1.61909 | 904.861 | 1.82808 | 0.139223   | 1.844 | 3.40081   | 0.9734 | 904.861 | Blood      |                                                                                             |
| <i>SELL</i>         | selectin L                                                     | 1.18212 | 696.891 | 0.40014 | 0.0213302  | 0.614 | 0.98613   | 0.6272 | 696.891 | Blood      |                                                                                             |
| <i>SLC4A1</i>       | solute carrier family 4 (anion exchanger), member 1 (Diego I   | 0.53236 | 682.359 | 0.77049 | 0.007127   | 0.111 | 2.26319   | 0.044  | 682.359 | Blood      |                                                                                             |
| <i>CA1</i>          | carbonic anhydrase I                                           | 0.13072 | 646.323 | 0.08292 | 0.0099249  | 0.02  | 0.85557   | 0.0198 | 646.323 | Blood      |                                                                                             |
| <i>CD52</i>         | CD52 molecule                                                  | 9.71651 | 610.509 | 2.08159 | 0.0129236  | 1.811 | 6.81823   | 2.8456 | 610.509 | Blood      |                                                                                             |
| <i>S100A9</i>       | S100 calcium binding protein A9                                | 0.40654 | 586.988 | 0.21593 | 0.0401566  | 0.125 | 6.39559   | 0.1844 | 586.988 | Blood      |                                                                                             |
| <i>DNAI2</i>        | dynein, axonemal, intermediate chain 2                         | 0.07174 | 427.83  | 2.9213  | 0.0064386  | 1.652 | 3.00147   | 0.1679 | 427.83  | Blood      |                                                                                             |
| <i>IFIT1B</i>       | interferon-induced protein with tetratricopeptide repeats 1    | 0.15954 | 427.43  | 0.3951  | 0.0126759  | 0.297 | 0.38511   | 0.1095 | 427.43  | Blood      |                                                                                             |
| <i>MNDA</i>         | myeloid cell nuclear differentiation antigen                   | 9.78374 | 422.066 | 3.91453 | 0.0309068  | 4.273 | 7.98511   | 2.0923 | 422.066 | Blood      |                                                                                             |
| <i>GYPA</i>         | glycophorin A (MNS blood group)                                | 0.0166  | 333.829 | 0.09705 | 0.0082046  | 0.046 | 0.27031   | 0.0868 | 333.829 | Blood      |                                                                                             |
| <i>TUBB1</i>        | tubulin, beta 1 class VI                                       | 2.86652 | 321.042 | 8.83069 | 0.2702692  | 9.062 | 7.0658    | 6.7667 | 321.042 | Blood      | granulocyte-specific expression profile <sup>5</sup>                                        |
| <i>CSF3R</i>        | colony stimulating factor 3 receptor (granulocyte)             | 1.86434 | 298.799 | 0.74464 | 0.0062131  | 0.647 | 2.10644   | 0.5129 | 298.799 | Blood      |                                                                                             |
| <i>PPBP</i>         | pro-platelet basic protein (chemokine (C-X-C motif) ligand 7   | 0.08841 | 293.199 | 0.03981 | 0.0054294  | 0.017 | 0.29933   | 0.0166 | 293.199 | Blood      |                                                                                             |
| <i>IKZF1</i>        | IKAROS family zinc finger 1 (Ikaros)                           | 5.69602 | 284.778 | 7.39798 | 0.0013347  | 6.907 | 5.0687    | 5.6931 | 284.778 | Blood      |                                                                                             |
| <i>FAIM3</i>        | Fas apoptotic inhibitory molecule 3                            | 4.4721  | 274.113 | 5.71989 | 4.2443931  | 4.704 | 3.427     | 4.6085 | 274.113 | Blood      |                                                                                             |
| <i>PHOSPHO1</i>     | phosphatase, orphan 1                                          | 1.19298 | 259.229 | 3.84816 | 0.0813775  | 4.355 | 1.38958   | 4.1806 | 259.229 | Blood      |                                                                                             |
| <i>LOC103218320</i> | multidrug resistance-associated protein 1-like                 | 0.0276  | 258.752 | 3.0322  | 0.0050187  | 3.573 | 0.6083    | 4.0503 | 258.752 | Blood      |                                                                                             |
| <i>PTPRCAP</i>      | protein tyrosine phosphatase, receptor type, C-associated p    | 3.96477 | 247.138 | 1.88494 | 0.2962148  | 1.441 | 3.51085   | 1.5907 | 247.138 | Blood      |                                                                                             |
| <i>SAMD9</i>        | sterile alpha motif domain containing 9                        | 7.67217 | 241.471 | 5.60187 | 0.728545   | 7.457 | 3.67927   | 2.8625 | 241.471 | Blood      |                                                                                             |
| <i>FYB</i>          | FYN binding protein                                            | 6.60373 | 240.504 | 7.37868 | 0.2835352  | 8.762 | 6.89427   | 5.5687 | 240.504 | Blood      |                                                                                             |
| <i>TAGAP</i>        | T-cell activation RhoGTPase activating protein                 | 3.1357  | 221.868 | 5.36609 | 0.7699518  | 5.603 | 2.2658    | 3.8776 | 221.868 | Blood      |                                                                                             |
| <i>RGS18</i>        | regulator of G-protein signaling 18                            | 1.92409 | 214.933 | 3.81188 | 0.0085742  | 5.112 | 1.51364   | 3.7099 | 214.933 | Blood      |                                                                                             |

**Supplementary Table 3. Genes with high expression in one of the seven tissues evaluated with RNA-Seq. Presented are the means per tissue of CPM of TMM normalized count data. References are provided at the bottom of the table.**

| VervetGeneSymbol  | Description                                                      | Adrenal | Blood   | Caudate | Fibroblast | Hippo | Pituitary | BA46   | Max     | Tissue.Max | Gene links to the tissue function*                                                                                                |
|-------------------|------------------------------------------------------------------|---------|---------|---------|------------|-------|-----------|--------|---------|------------|-----------------------------------------------------------------------------------------------------------------------------------|
| <i>CSF2RB</i>     | colony stimulating factor 2 receptor, beta, low-affinity (gran   | 5.76557 | 212.738 | 2.41002 | 0.2373445  | 2.453 | 4.27773   | 2.2889 | 212.738 | Blood      | granulocyte-specific expression profile <sup>5</sup>                                                                              |
| <i>WDFY4</i>      | WDFY family member 4                                             | 9.0863  | 211.01  | 8.28788 | 0.1456566  | 8.052 | 4.06722   | 6.1162 | 211.01  | Blood      |                                                                                                                                   |
| <i>HCLS1</i>      | hematopoietic cell-specific Lyn substrate 1                      | 9.85568 | 210.45  | 5.04323 | 0.3959009  | 5.299 | 7.93302   | 4.0685 | 210.45  | Blood      |                                                                                                                                   |
| <i>CCR7</i>       | chemokine (C-C motif) receptor 7                                 | 0.90704 | 210.431 | 0.1255  | 1.1361711  | 0.151 | 0.521     | 0.1869 | 210.431 | Blood      |                                                                                                                                   |
| <i>ITK</i>        | IL2-inducible T-cell kinase                                      | 1.20429 | 207.227 | 1.29309 | 0.004317   | 0.116 | 0.60054   | 0.1465 | 207.227 | Blood      |                                                                                                                                   |
| <i>LCK</i>        | lymphocyte-specific protein tyrosine kinase                      | 3.22682 | 206.222 | 0.17094 | 0.0051783  | 0.558 | 1.4517    | 0.2232 | 206.222 | Blood      |                                                                                                                                   |
| <i>SYK</i>        | spleen tyrosine kinase                                           | 5.36424 | 202.679 | 6.13767 | 0.0092155  | 6.222 | 4.91539   | 5.8755 | 202.679 | Blood      | B-lymphocytes-specific expression profile <sup>5</sup>                                                                            |
| <i>ICAM4</i>      | intercellular adhesion molecule 4 (Landsteiner-Wiener bloo       | 0.58076 | 202.447 | 0.36422 | 0.5094981  | 1.455 | 0.45466   | 1.3257 | 202.447 | Blood      |                                                                                                                                   |
| <i>SLA</i>        | Src-like-adaptor                                                 | 4.55569 | 201.596 | 4.93429 | 0.6827327  | 4.81  | 4.65201   | 7.6022 | 201.596 | Blood      |                                                                                                                                   |
| <i>BIN2</i>       | bridging integrator 2                                            | 8.56543 | 197.903 | 9.19053 | 0.0103679  | 9.271 | 6.77759   | 7.4435 | 197.903 | Blood      |                                                                                                                                   |
| <i>ITGB7</i>      | integrin, beta 7                                                 | 2.26861 | 192.36  | 1.39781 | 0.2896981  | 1.11  | 1.25833   | 1.1638 | 192.36  | Blood      |                                                                                                                                   |
| <i>EPB42</i>      | erythrocyte membrane protein band 4.2                            | 0.17348 | 185.244 | 0.54186 | 0.0146697  | 0.643 | 0.5039    | 0.7406 | 185.244 | Blood      |                                                                                                                                   |
| <i>RAC2</i>       | ras-related C3 botulinum toxin substrate 2 (rho family, smal     | 8.47778 | 182.007 | 0.34371 | 0.1670654  | 0.362 | 4.07683   | 0.3183 | 182.007 | Blood      | a crucial role in T-cell development <sup>6</sup>                                                                                 |
| <i>ARHGAP15</i>   | Rho GTPase activating protein 15                                 | 2.48094 | 180.697 | 2.07022 | 0.0134773  | 4.871 | 1.44684   | 3.8718 | 180.697 | Blood      |                                                                                                                                   |
| <i>SPTA1</i>      | spectrin, alpha, erythrocytic 1 (elliptocytosis 2)               | 0.0703  | 176.331 | 0.62955 | 0.0169989  | 0.027 | 1.06831   | 0.0547 | 176.331 | Blood      |                                                                                                                                   |
| <i>TNFRSF10C</i>  | tumor necrosis factor receptor superfamily, member 10c, de       | 0.156   | 175.366 | 0.09162 | 0.0214552  | 0.046 | 0.47142   | 0.0613 | 175.366 | Blood      |                                                                                                                                   |
| <i>GPR160</i>     | G protein-coupled receptor 160                                   | 0.37351 | 172.74  | 1.84634 | 2.0446647  | 4.499 | 1.51714   | 2.3069 | 172.74  | Blood      |                                                                                                                                   |
| <i>TMEM154</i>    | transmembrane protein 154                                        | 0.75609 | 171.639 | 0.83376 | 4.1035227  | 1.347 | 1.57482   | 1.5051 | 171.639 | Blood      |                                                                                                                                   |
| <i>TRIM58</i>     | tripartite motif containing 58                                   | 1.3372  | 169.446 | 1.31528 | 2.3272836  | 8.429 | 3.29084   | 6.0942 | 169.446 | Blood      | granulocyte-specific expression profile <sup>5</sup>                                                                              |
| <i>MYO1G</i>      | myosin IG                                                        | 4.87605 | 167.294 | 1.3589  | 0.0335384  | 0.31  | 2.13445   | 0.7187 | 167.294 | Blood      |                                                                                                                                   |
| <i>NCF2</i>       | neutrophil cytosolic factor 2                                    | 6.94626 | 160.915 | 6.36527 | 0.1752165  | 6.585 | 6.59206   | 4.2583 | 160.915 | Blood      |                                                                                                                                   |
| <i>CXCR2</i>      | chemokine (C-X-C motif) receptor 2                               | 0.37292 | 160.77  | 0.45831 | 0.0063517  | 0.475 | 0.7306    | 0.3963 | 160.77  | Blood      |                                                                                                                                   |
| <i>HBM</i>        | hemoglobin, mu                                                   | 0.01872 | 158.583 | 0.16214 | 0.004093   | 0.146 | 0.49123   | 0.0233 | 158.583 | Blood      |                                                                                                                                   |
| <i>NFE2</i>       | nuclear factor, erythroid 2                                      | 0.12315 | 150.242 | 0.11881 | 0.0996207  | 0.138 | 3.65572   | 0.0624 | 150.242 | Blood      |                                                                                                                                   |
| <i>TBC1D10C</i>   | TBC1 domain family, member 10C                                   | 2.46192 | 149.682 | 2.04228 | 0.1177031  | 0.686 | 2.65843   | 0.8981 | 149.682 | Blood      | a component of T-cell receptor complex on the surface of T-cell lymphocytes                                                       |
| <i>DPEP2</i>      | dipeptidase 2                                                    | 4.1437  | 149.173 | 0.46393 | 0.0519735  | 0.52  | 1.75374   | 0.368  | 149.173 | Blood      |                                                                                                                                   |
| <i>NLRP12</i>     | NLR family, pyrin domain containing 12                           | 0.71242 | 146.294 | 0.14345 | 0.0972757  | 0.44  | 0.25348   | 0.2669 | 146.294 | Blood      |                                                                                                                                   |
| <i>IL16</i>       | interleukin 16                                                   | 9.05422 | 141.607 | 4.35364 | 1.9403878  | 3.384 | 4.54366   | 2.3579 | 141.607 | Blood      |                                                                                                                                   |
| <i>CD247</i>      | CD247 molecule                                                   | 1.49865 | 139.885 | 0.39725 | 0.0440795  | 0.271 | 1.94811   | 0.3561 | 139.885 | Blood      |                                                                                                                                   |
| <i>GIMAP7</i>     | GTPase, IMAP family member 7                                     | 8.44495 | 139.628 | 2.53748 | 0.0055401  | 2.104 | 5.47873   | 1.806  | 139.628 | Blood      |                                                                                                                                   |
| <i>IDO1</i>       | indoleamine 2,3-dioxygenase 1                                    | 4.72264 | 134.578 | 0.09899 | 0.0168587  | 0.154 | 1.35854   | 0.1319 | 134.578 | Blood      | expressed in T-lymphocytes <sup>8</sup>                                                                                           |
| <i>SASH3</i>      | SAM and SH3 domain containing 3                                  | 4.94053 | 129.76  | 3.51595 | 0.0578001  | 3.67  | 4.07672   | 2.9602 | 129.76  | Blood      |                                                                                                                                   |
| <i>ITGAL</i>      | integrin, alpha L (antigen CD11A (p180), lymphocyte functio      | 3.5473  | 125.127 | 1.46544 | 0.0330256  | 0.965 | 2.22777   | 0.9641 | 125.127 | Blood      |                                                                                                                                   |
| <i>CD28</i>       | CD28 molecule                                                    | 0.64319 | 123.58  | 0.37204 | 0.0074687  | 0.563 | 0.5559    | 0.4777 | 123.58  | Blood      |                                                                                                                                   |
| <i>GRAP</i>       | GRB2-related adaptor protein                                     | 4.61528 | 123.495 | 3.82252 | 0.0293726  | 2.915 | 3.10314   | 3.3656 | 123.495 | Blood      |                                                                                                                                   |
| <i>ACAP1</i>      | ArfGAP with coiled-coil, ankyrin repeat and PH domains 1         | 4.49456 | 122.338 | 5.16906 | 0.6244673  | 2.891 | 3.96063   | 5.2017 | 122.338 | Blood      |                                                                                                                                   |
| <i>PIK3CG</i>     | phosphatidylinositol-4,5-bisphosphate 3-kinase, catalytic su     | 3.96204 | 120.873 | 4.66636 | 0.0187881  | 4.481 | 3.02214   | 3.834  | 120.873 | Blood      | plays a crucial role in the blood coagulation system and is involved in bleedin highly expressed in primate caudate <sup>11</sup> |
| <i>ARHGAP25</i>   | Rho GTPase activating protein 25                                 | 5.56771 | 120.404 | 3.09473 | 0.0910841  | 3.375 | 4.67395   | 4.3869 | 120.404 | Blood      |                                                                                                                                   |
| <i>C5H16orf54</i> | chromosome 5 open reading frame, human C16orf54                  | 1.76697 | 120.069 | 1.78915 | 0.0017853  | 1.399 | 1.45079   | 0.9107 | 120.069 | Blood      |                                                                                                                                   |
| <i>GRAP2</i>      | GRB2-related adaptor protein 2                                   | 0.67118 | 115.758 | 9.2738  | 0.2629744  | 1.858 | 1.6753    | 4.4376 | 115.758 | Blood      |                                                                                                                                   |
| <i>SLFN14</i>     | schlafen family member 14                                        | 0.50108 | 112.603 | 0.11824 | 0.0124975  | 0.073 | 0.12506   | 0.088  | 112.603 | Blood      |                                                                                                                                   |
| <i>CEACAM8</i>    | carcinoembryonic antigen-related cell adhesion molecule 8        | 0.9532  | 110.705 | 0.61223 | 2.0276954  | 0.779 | 0.56339   | 1.6412 | 110.705 | Blood      |                                                                                                                                   |
| <i>HCK</i>        | hemopoietic cell kinase                                          | 6.67133 | 105.138 | 4.50921 | 0.0072104  | 4.085 | 4.25221   | 3.3802 | 105.138 | Blood      | highly expressed in primate caudate <sup>11</sup>                                                                                 |
| <i>FGR</i>        | feline Gardner-Rasheed sarcoma viral oncogene homolog            | 6.85491 | 104.652 | 2.99501 | 0.0379101  | 2.199 | 2.46274   | 3.1518 | 104.652 | Blood      |                                                                                                                                   |
| <i>FCN1</i>       | ficolin (collagen/fibrinogen domain containing) 1                | 0.35937 | 104.334 | 0.02149 | 0.0037023  | 0.007 | 0.35056   | 0.019  | 104.334 | Blood      |                                                                                                                                   |
| <i>ARHGAP9</i>    | Rho GTPase activating protein 9                                  | 3.61136 | 104.314 | 3.6441  | 0.5965154  | 2.546 | 2.98619   | 3.3161 | 104.314 | Blood      |                                                                                                                                   |
| <i>ITGA2B</i>     | integrin, alpha 2b (platelet glycoprotein IIb of IIb/IIIa comple | 2.54366 | 100.039 | 0.89719 | 0.2402636  | 0.927 | 4.22703   | 3.3328 | 100.039 | Blood      |                                                                                                                                   |
| <i>SYNDIG1L</i>   | synapse differentiation inducing 1-like                          | 0.00695 | 1.65544 | 1643.46 | 0.0062972  | 8.388 | 0.14088   | 6.9838 | 1643.46 | Caudate    |                                                                                                                                   |
| <i>ANKRD34B</i>   | ankyrin repeat domain 34B                                        | 0.1371  | 0.8741  | 131.476 | 0.6091162  | 5.926 | 0.77101   | 6.0818 | 131.476 | Caudate    | highly expressed in primate caudate <sup>11</sup>                                                                                 |
| <i>GPR149</i>     | G protein-coupled receptor 149                                   | 0.14648 | 2.05913 | 100.111 | 0.0047378  | 1.301 | 0.22843   | 2.5745 | 100.111 | Caudate    |                                                                                                                                   |
| <i>GREM1</i>      | gremlin 1, DAN family BMP antagonist                             | 0.85543 | 2.73165 | 6.95508 | 2717.083   | 6.603 | 7.19289   | 3.5768 | 2717.08 | Fibroblast |                                                                                                                                   |
| <i>LRRC15</i>     | leucine rich repeat containing 15                                | 1.46922 | 3.19143 | 0.37839 | 1326.0936  | 0.104 | 0.13224   | 0.021  | 1326.09 | Fibroblast |                                                                                                                                   |
| <i>MFAP5</i>      | microfibrillar associated protein 5                              | 3.64449 | 1.45438 | 0.0605  | 576.90715  | 2.437 | 2.40718   | 0.036  | 576.907 | Fibroblast |                                                                                                                                   |

**Supplementary Table 3. Genes with high expression in one of the seven tissues evaluated with RNA-Seq. Presented are the means per tissue of CPM of TMM normalized count data. References are provided at the bottom of the table.**

| VervetGeneSymbol | Description                                                 | Adrenal | Blood   | Caudate | Fibroblast | Hippo | Pituitary | BA46   | Max     | Tissue.Max | Gene links to the tissue function*                                                                               |
|------------------|-------------------------------------------------------------|---------|---------|---------|------------|-------|-----------|--------|---------|------------|------------------------------------------------------------------------------------------------------------------|
| ADAMTS12         | ADAM metalloproteinase with thrombospondin type 1 motif     | 6.26744 | 5.88702 | 0.81667 | 483.66447  | 1.797 | 1.78261   | 5.3783 | 483.664 | Fibroblast |                                                                                                                  |
| KRT7             | keratin 7                                                   | 0.98287 | 1.8237  | 0.04404 | 436.75437  | 0.331 | 8.12842   | 1.6153 | 436.754 | Fibroblast |                                                                                                                  |
| LOX              | lysyl oxidase                                               | 6.87638 | 2.48235 | 0.76194 | 360.80632  | 5.541 | 3.24337   | 2.1599 | 360.806 | Fibroblast | involved in connective tissues functions <sup>12</sup>                                                           |
| DKK1             | dickkopf WNT signaling pathway inhibitor 1                  | 2.68719 | 0.66992 | 0.17735 | 323.48887  | 0.349 | 3.1234    | 2.2633 | 323.489 | Fibroblast | expressed in fibroblasts <sup>13</sup>                                                                           |
| CREB3L1          | cAMP responsive element binding protein 3-like 1            | 8.11879 | 2.45756 | 0.76705 | 251.01609  | 1.278 | 8.83631   | 1.3623 | 251.016 | Fibroblast |                                                                                                                  |
| FAP              | fibroblast activation protein, alpha                        | 5.42582 | 2.06841 | 0.27513 | 223.92162  | 0.311 | 1.66847   | 3.054  | 223.922 | Fibroblast | control of fibroblast growth <sup>14</sup>                                                                       |
| LOC103228547     | uncharacterized LOC103228547                                | 8.02166 | 0.73147 | 0.95235 | 221.78529  | 7.085 | 1.70055   | 0.9114 | 221.785 | Fibroblast |                                                                                                                  |
| PAPPA            | pregnancy-associated plasma protein A, pappalysin 1         | 3.36117 | 4.57555 | 4.5746  | 186.49797  | 2.617 | 1.70006   | 5.8793 | 186.498 | Fibroblast |                                                                                                                  |
| CTHRC1           | collagen triple helix repeat containing 1                   | 0.91535 | 1.79414 | 4.84924 | 176.73317  | 5.407 | 9.40576   | 5.3876 | 176.733 | Fibroblast |                                                                                                                  |
| AHRR             | aryl-hydrocarbon receptor repressor                         | 2.68431 | 6.08175 | 8.62163 | 164.03714  | 6.492 | 6.49391   | 9.4615 | 164.037 | Fibroblast |                                                                                                                  |
| LOC103246059     | A disintegrin and metalloproteinase with thrombospondin r   | 2.48844 | 1.54259 | 0.6998  | 141.3365   | 1.329 | 1.33267   | 0.9723 | 141.336 | Fibroblast |                                                                                                                  |
| MXRA5            | matrix-remodelling associated 5                             | 1.35586 | 0.7689  | 0.8753  | 140.49966  | 2.537 | 2.42318   | 1.7359 | 140.5   | Fibroblast | fibroblast functions <sup>15</sup>                                                                               |
| STC2             | stanniocalcin 2                                             | 1.71629 | 3.0736  | 0.48159 | 136.16403  | 0.657 | 2.45464   | 1.37   | 136.164 | Fibroblast |                                                                                                                  |
| NUPR1            | nuclear protein, transcriptional regulator, 1               | 7.87828 | 2.41962 | 1.69673 | 128.36354  | 3.753 | 5.78662   | 1.5071 | 128.364 | Fibroblast |                                                                                                                  |
| VGLL3            | vestigial-like family member 3                              | 2.24105 | 1.2349  | 0.43655 | 127.56238  | 3.172 | 0.52289   | 0.5052 | 127.562 | Fibroblast |                                                                                                                  |
| PTGDR2           | prostaglandin D2 receptor 2                                 | 4.27626 | 7.10525 | 2.56264 | 123.25984  | 2.289 | 4.57497   | 1.9674 | 123.26  | Fibroblast |                                                                                                                  |
| WISP1            | WNT1 inducible signaling pathway protein 1                  | 1.15569 | 1.57859 | 0.32221 | 118.57036  | 0.46  | 1.2281    | 0.4115 | 118.57  | Fibroblast |                                                                                                                  |
| GDF15            | growth differentiation factor 15                            | 1.59988 | 1.8955  | 0.55922 | 110.46743  | 1.086 | 0.31309   | 1.3943 | 110.467 | Fibroblast |                                                                                                                  |
| CKAP2            | cytoskeleton associated protein 2                           | 4.03398 | 5.53649 | 3.62243 | 106.7829   | 9.4   | 7.68669   | 6.0167 | 106.783 | Fibroblast |                                                                                                                  |
| POMC             | proopiomelanocortin                                         | 9.13195 | 0.91481 | 2.56866 | 1.5617152  | 1.013 | 22141.6   | 1.68   | 22141.6 | Pituitary  | coding a precursor of ACTH synthesized mainly in the anterior lobe of the pituitary growth hormone <sup>17</sup> |
| LOC103243211     | somatotropin                                                | 2.25858 | 0.27496 | 0.06203 | 0.4746679  | 0.008 | 8700.7    | 0      | 8700.7  | Pituitary  | glycoprotein hormone coding a subunit alpha of luteinizing hormone (LH), fo                                      |
| CGA              | glycoprotein hormones, alpha polypeptide                    | 1.17134 | 1.63155 | 0.20511 | 0.1448983  | 0.158 | 2333.25   | 0.2254 | 2333.25 | Pituitary  |                                                                                                                  |
| GPR50            | G protein-coupled receptor 50                               | 0.38016 | 1.64213 | 0.06901 | 0.039129   | 0.303 | 402.89    | 0.0854 | 402.89  | Pituitary  |                                                                                                                  |
| PITX1            | paired-like homeodomain 1                                   | 0.15652 | 2.62771 | 0.13069 | 2.2180586  | 0.428 | 368.347   | 0.0868 | 368.347 | Pituitary  | involvement in pituitary development <sup>19</sup>                                                               |
| LOC103244205     | nose resistant to fluoxetine protein 6-like                 | 0.24848 | 2.40042 | 0.19456 | 2.6695869  | 0.448 | 366.005   | 0.4421 | 366.005 | Pituitary  |                                                                                                                  |
| LHX3             | LIM homeobox 3                                              | 0.0998  | 1.8607  | 0.17645 | 0.0285294  | 0.134 | 323.719   | 0.0869 | 323.719 | Pituitary  | transcription factor in pituitary development mutated in combined pituitary I                                    |
| SIX2             | SIX homeobox 2                                              | 0.4951  | 2.80929 | 0.20709 | 0.5668065  | 0.016 | 221.262   | 0.5097 | 221.262 | Pituitary  |                                                                                                                  |
| TBX19            | T-box 19                                                    | 3.93586 | 5.73745 | 1.81374 | 1.0612523  | 3.157 | 174.514   | 0.9303 | 174.514 | Pituitary  | pituitary expression <sup>22</sup>                                                                               |
| IRS4             | insulin receptor substrate 4                                | 0.12948 | 1.71543 | 3.18921 | 0.0189929  | 3.671 | 149.549   | 1.9885 | 149.549 | Pituitary  | IRS-4 is restricted almost exclusively to the pituitary gland and brain <sup>23</sup>                            |
| CITED1           | Cbp/p300-interacting transactivator, with Glu/Asp-rich carb | 4.32754 | 1.58345 | 4.40898 | 0.0547896  | 8.745 | 131.987   | 4.9819 | 131.987 | Pituitary  |                                                                                                                  |
| PAX7             | paired box 7                                                | 0.07404 | 3.99654 | 0.02562 | 0.0303716  | 0.314 | 123.632   | 0.3955 | 123.632 | Pituitary  | pituitary expression <sup>24</sup><br>involved in pituitary organogenesis <sup>25</sup>                          |
| PITX2            | paired-like homeodomain 2                                   | 2.3887  | 3.51857 | 0.00565 | 2.8584209  | 0.002 | 100.327   | 0.0012 | 100.327 | Pituitary  |                                                                                                                  |

\*References:

- Lin, D., Sugawara, T., Strauss, J.F., 3rd, Clark, B.J., Stocco, D.M., Saenger, P., Rogol, A., and Miller, W.L. (1995). Role of steroidogenic acute regulatory protein in adrenal and gonadal steroidogenesis. *Science* 267, 1828-1831.
- Chida, D., Nakagawa, S., Nagai, S., Sagara, H., Katsumata, H., Imaki, T., Suzuki, H., Mitani, F., Ogishima, T., Shimizu, C., et al. (2007). Melanocortin 2 receptor is required for adrenal gland development, steroidogenesis, and neonatal gluconeogenesis. *J Biol Chem* 282, 1151-1157.
- Birumachi, J., Hiroshima, M., Fujiwara, Y., Aoyagi, T., Sanbe, A., and Tanoue, A. (2007). Impaired arginine-vasopressin-induced aldosterone release from adrenal gland cells in mice lacking the vasopressin V1A receptor. *Eur J Pharmacol* 557, 105-112.
- Insel, T.R. (2010). The challenge of translation in social neuroscience: a review of oxytocin, vasopressin, and affiliative behavior. *Neuron* 65, 768-779.
- Palmer, C., Diehn, M., Alizadeh, A.A., and Brown, P.O. (2006). Cell-type specific gene expression profiles of leukocytes in human peripheral blood. *BMC Genomics* 7, 115.
- Guo F., Cancelas J. A., Hildeman D., Williams D. A., and Zheng Y. (2008) Rac GTPase isoforms Rac1 and Rac2 play a redundant and crucial role in T-cell development. *Blood* 112, 1767-1775.
- Call, M.E., Schnell, J.R., Xu, C., Lutz, R.A., Chou, J.J., and Wucherpfennig, K.W. (2006). The structure of the zeta-zeta transmembrane dimer reveals features essential for its assembly with the T cell receptor. *Cell* 127, 355-368.
- Jenkins, M.K., Taylor, P.S., Norton, S.D., and Urdahl, K.B. (1991). CD28 delivers a costimulatory signal involved in antigen-specific IL-2 production by human T cells. *Journal of immunology* 147, 2461-2466.
- Prandini, M. H., Denarier, E., Frachet, P., Uzan, G., Marguerie, G. (1988) Isolation of the human platelet glycoprotein IIb gene and characterization of the 5-prime flanking region. *Biochem. Biophys. Res. Commun.* 156: 595-601.
- Ferrer, M., Tao, J., Iruin, G., Sanchez-Ayuso, M., Gonzalez-Rodriguez, J., Parrilla, R., Gonzalez-Manchon, C. Truncation of glycoprotein (GP) IIIa (delta 616-762) prevents complex formation with GPIIb: novel mutation in exon 11 of GPIIIa associated with thrombasthenia. *Blood* 97: 1007-1012.
- de Chaldée M, Brochier C, Van de Vel A, Caudy N, Luthi-Carter R, Gaillard MC, Elalouf JM. (2006) Capucin: a novel striatal marker down-regulated in rodent models of Huntington disease. *Genomics*. Feb;87(2):200-7.
- Ryan T, Kendall and Carol A. Feghali-Bostwick (2014) Fibroblasts in fibrosis: novel roles and mediators. *Front Pharmacol*. 2014; 5: 123.
- Yamaguchi, Y., Itami, S., Watabe, H., Yasumoto, K., Abdel-Malek, Z.A., Kubo, T., Rouzaud, F., Tanemura, A., Yoshikawa, K., and Hearing, V.J. (2004). Mesenchymal-epithelial interactions in the skin: increased expression of dickkopf1 by palmoplantar keratoderma. *J Biol Chem* 279, 1010-1016.
- Huber, M.A., Kraut, N., Park, J.E., Schubert, R.D., Rettig, W.J., Peter, R.U., and Garin-Chesa, P. (2003). Fibroblast activation protein: differential expression and serine protease activity in reactive stromal fibroblasts of melanocytic skin tumors. *J Biol Chem* 278, 1010-1016.
- Zhang, C. et al. (2009) Fibroblast growth factor receptor 2-positive fibroblasts provide a suitable microenvironment for tumor development and progression in esophageal carcinoma. *Clin Cancer Res* 15, 4017-4027.
- Herbert, E. & Uhler, M. Biosynthesis of polyprotein precursors to regulatory peptides. *Cell* 30, 1-2 (1982).
- Daughaday, W.H., and Parker, M.L. (1965). Human Pituitary Growth Hormone. *Annual Review of Medicine* 16, 47-66.
- Fiddes, J.C., and Goodman, H.M. (1981). The gene encoding the common alpha subunit of the four human glycoprotein hormones. *Journal of Molecular and Applied Genetics* 1, 3-18.
- Szeto, D.P., Ryan, A.K., O'Connell, S.M., and Rosenfeld, M.G. (1996). P-OTX: a PIT-1-interacting homeodomain factor expressed during anterior pituitary gland development. *Proc Natl Acad Sci U S A* 93, 7706-7710.
- Colvin, S.C., Mullen, R.D., Pfaeffle, R.W., and Rhodes, S.J. (2009). LHX3 and LHX4 transcription factors in pituitary development and disease. *Pediatric Endocrinology Reviews: PER* 6 Suppl 2, 283-290.



**Supplementary Table 4. Rank correlation values ( $\rho$ ) for expression comparison between vervet and human data from ABA.**

**V=Vervet; H=Human. d=days, y=years, m=months**

| Age (V)   | Age (H)  | BA46 (V) vs DLPFC (H) |                  |       | Caudate (V) vs Striatum (H) |                  |       | Hippocampus (V) vs Hippocampus (H) |                  |       |
|-----------|----------|-----------------------|------------------|-------|-----------------------------|------------------|-------|------------------------------------|------------------|-------|
|           |          | # of samples (V)      | # of samples (H) | Rho   | # of samples (V)            | # of samples (H) | Rho   | # of samples (V)                   | # of samples (H) | Rho   |
| 7 d       | <=5 m    | 5                     | 2                | 0.638 | 5                           | 2                | 0.548 | 5                                  | 2                | 0.628 |
| 90 d      | 6-18 m   | 6                     | 2                | 0.618 | 6                           | 1                | 0.537 | 6                                  | 1                | 0.615 |
| 1-1.25 y  | 19m-5y   | 12                    | 3                | 0.544 | 12                          | 2                | 0.539 | 12                                 | 2                | 0.552 |
| 1.5-2.5 y | 6-11y    | 22                    | 3                | 0.599 | 22                          | 1                | 0.567 | 23                                 | 3                | 0.66  |
| 3-4y      | 12-19y   | 6                     | 3                | 0.603 | 6                           | 2                | 0.512 | 6                                  | 3                | 0.601 |
| >=5y      | 20-60+ y | 6                     | 5                | 0.591 | 6                           | 5                | 0.549 | 6                                  | 5                | 0.622 |

**Supplementary Table 5. Rank correlation values (rho) for expression comparison between vervet and rhesus data from ABA. V=Vervet; R=Rhesus. d=days, m=months, y=years**

| Age(V)  | Age® | BA46 (V) vs Medial Frontal Cortex (R) |                  |       | Caudate (V) vs Basal ganglia (R) |                  |       | Hippocampus (V) vs Hippocampal Cortex (R) |                  |       |
|---------|------|---------------------------------------|------------------|-------|----------------------------------|------------------|-------|-------------------------------------------|------------------|-------|
|         |      | # of samples (V)                      | # of samples (R) | Rho   | # of samples (V)                 | # of samples (R) | Rho   | # of samples (V)                          | # of samples (R) | Rho   |
| 7 d     | 0 m  | 2                                     | 3                | 0.381 | 2                                | 2                | 0.274 | 2                                         | 3                | 0.379 |
| 90 d    | 3 m  | 3                                     | 3                | 0.349 | 3                                | 3                | 0.287 | 3                                         | 3                | 0.372 |
| 1-1.25y | 12 m | 6                                     | 3                | 0.326 | 6                                | 3                | 0.303 | 6                                         | 3                | 0.371 |
| >=4 y   | 48 m | 3                                     | 3                | 0.339 | 3                                | 3                | 0.288 | 3                                         | 3                | 0.376 |

**Supplementary Table 6. Rank correlation values ( $\rho$ ) for expression comparison between vervet and human GTEx**

| <b>Vervet-GTEx Comparison</b> |              |              |              |                                        |
|-------------------------------|--------------|--------------|--------------|----------------------------------------|
| <b>Vervet</b>                 |              | <b>Human</b> |              | <b>Correlation (<math>\rho</math>)</b> |
| Tissue                        | # of Samples | Tissue       | # of Samples |                                        |
| Adrenal                       | 58           | Adrenal      | 126          | 0.794                                  |
| Blood                         | 58           | Blood        | 338          | 0.78                                   |
| Caudate                       | 57           | Caudate      | 100          | 0.683                                  |
| Hippocampus                   | 58           | Hippocampus  | 81           | 0.717                                  |
| Pituitary                     | 58           | Pituitary    | 87           | 0.795                                  |

**Supplementary Table 7. Genes in the top or bottom 10% of loadings on PC 1, PC 2, or PC 3, for tissues where that dimension in PCA showed a clear pattern with sex as illustrated in Figure 1.**

| VervetGeneSymbol | Description                                                | Tissue  | PC Dimension |
|------------------|------------------------------------------------------------|---------|--------------|
| ADAD1            | adenosine deaminase domain containing 1                    | Adrenal | 3            |
| AGXT2            | alanine--glyoxylate aminotransferase 2                     | Adrenal | 3            |
| ARHGAP36         | Rho GTPase activating protein 36                           | Adrenal | 3            |
| ARHGAP8          | Rho GTPase activating protein 8                            | Adrenal | 3            |
| B4GALNT2         | beta-1,4-N-acetyl-galactosaminyltransferase 2              | Adrenal | 3            |
| C16H17orf107     | chromosome 16 open reading frame, human C17orf107          | Adrenal | 3            |
| C23H5orf46       | chromosome 23 open reading frame, human C5orf46            | Adrenal | 3            |
| C26H15orf43      | telomere repeat binding bouquet formation protein 2        | Adrenal | 3            |
| C6H19orf26       | CACN beta subunit associated regulatory protein            | Adrenal | 3            |
| C9H10orf82       | chromosome 9 open reading frame, human C10orf82            | Adrenal | 3            |
| CADM2            | cell adhesion molecule 2                                   | Adrenal | 3            |
| CCDC33           | coiled-coil domain containing 33                           | Adrenal | 3            |
| CGA              | glycoprotein hormones, alpha polypeptide                   | Adrenal | 3            |
| CKM              | creatine kinase, M-type                                    | Adrenal | 3            |
| CNTNAP2          | contactin associated protein-like 2                        | Adrenal | 3            |
| COCH             | cochlin                                                    | Adrenal | 3            |
| CPN2             | carboxypeptidase N subunit 2                               | Adrenal | 3            |
| CPNE4            | copine 4                                                   | Adrenal | 3            |
| CYR61            | cysteine rich angiogenic inducer 61                        | Adrenal | 3            |
| DDX3Y            | DEAD-box helicase 3, Y-linked                              | Adrenal | 3            |
| DNER             | delta/notch like EGF repeat containing                     | Adrenal | 3            |
| DPEP1            | dipeptidase 1 (renal)                                      | Adrenal | 3            |
| DUSP9            | dual specificity phosphatase 9                             | Adrenal | 3            |
| EGR3             | early growth response 3                                    | Adrenal | 3            |
| EVX1             | even-skipped homeobox 1                                    | Adrenal | 3            |
| FERMT1           | fermitin family member 1                                   | Adrenal | 3            |
| FOSB             | FosB proto-oncogene, AP-1 transcription factor subunit     | Adrenal | 3            |
| FTHL17           | ferritin heavy chain like 17                               | Adrenal | 3            |
| GIPC2            | GIPC PDZ domain containing family member 2                 | Adrenal | 3            |
| GJC2             | gap junction protein gamma 2                               | Adrenal | 3            |
| GPR101           | G protein-coupled receptor 101                             | Adrenal | 3            |
| GPR149           | G protein-coupled receptor 149                             | Adrenal | 3            |
| GPR22            | G protein-coupled receptor 22                              | Adrenal | 3            |
| GRIN3B           | glutamate ionotropic receptor NMDA type subunit 3B         | Adrenal | 3            |
| HAND1            | heart and neural crest derivatives expressed 1             | Adrenal | 3            |
| HP               | haptoglobin                                                | Adrenal | 3            |
| IFI6             | interferon alpha inducible protein 6                       | Adrenal | 3            |
| IRX2             | iroquois homeobox 2                                        | Adrenal | 3            |
| ISG15            | ISG15 ubiquitin-like modifier                              | Adrenal | 3            |
| KCNC2            | potassium voltage-gated channel subfamily C member 2       | Adrenal | 3            |
| KDM5D            | lysine demethylase 5D                                      | Adrenal | 3            |
| KLK3             | kallikrein related peptidase 3                             | Adrenal | 3            |
| KRBOX1           | KRAB box domain containing 1                               | Adrenal | 3            |
| LOC103214525     | steroidogenic acute regulatory protein, mitochondrial-like | Adrenal | 3            |
| LOC103214550     | ferritin heavy chain pseudogene                            | Adrenal | 3            |
| LOC103214638     | uncharacterized LOC103214638                               | Adrenal | 3            |
| LOC103214639     | probable ATP-dependent RNA helicase DDX6                   | Adrenal | 3            |
| LOC103214682     | uncharacterized LOC103214682                               | Adrenal | 3            |
| LOC103214794     | uncharacterized LOC103214794                               | Adrenal | 3            |
| LOC103215213     | spermine synthase pseudogene                               | Adrenal | 3            |
| LOC103215237     | uncharacterized LOC103215237                               | Adrenal | 3            |
| LOC103215347     | uncharacterized LOC103215347                               | Adrenal | 3            |
| LOC103215782     | 60S ribosomal protein L9 pseudogene                        | Adrenal | 3            |
| LOC103216847     | uncharacterized LOC103216847                               | Adrenal | 3            |
| LOC103216848     | uncharacterized LOC103216848                               | Adrenal | 3            |
| LOC103217010     | 60S ribosomal protein L12 pseudogene                       | Adrenal | 3            |
| LOC103217729     | gamma-crystallin D                                         | Adrenal | 3            |
| LOC103217948     | uncharacterized LOC103217948                               | Adrenal | 3            |
| LOC103218076     | alkaline phosphatase, placental-like                       | Adrenal | 3            |
| LOC103218078     | uncharacterized LOC103218078                               | Adrenal | 3            |
| LOC103218277     | endothelin-converting enzyme-like 1                        | Adrenal | 3            |
| LOC103218335     | endothelin-converting enzyme-like 1                        | Adrenal | 3            |
| LOC103218363     | uncharacterized LOC103218363                               | Adrenal | 3            |
| LOC103218706     | elongation factor 1-alpha 1 pseudogene                     | Adrenal | 3            |
| LOC103219050     | uncharacterized LOC103219050                               | Adrenal | 3            |
| LOC103219409     | uncharacterized LOC103219409                               | Adrenal | 3            |
| LOC103219451     | ubiquitin-40S ribosomal protein S27a pseudogene            | Adrenal | 3            |
| LOC103219985     | regenerating islet-derived protein 3-alpha                 | Adrenal | 3            |



**Supplementary Table 7. Genes in the top or bottom 10% of loadings on PC 1, PC 2, or PC 3, for tissues where that dimension in PCA showed a clear pattern with sex as illustrated in Figure 1.**

| VervetGeneSymbol | Description                                                                                | Tissue  | PC Dimension |
|------------------|--------------------------------------------------------------------------------------------|---------|--------------|
| LOC103219988     | lithostathine-1-alpha-like                                                                 | Adrenal | 3            |
| LOC103219990     | regenerating islet-derived protein 3-gamma                                                 | Adrenal | 3            |
| LOC103220053     | 60S ribosomal protein L3 pseudogene                                                        | Adrenal | 3            |
| LOC103221597     | heterogeneous nuclear ribonucleoprotein H-like                                             | Adrenal | 3            |
| LOC103221683     | major histocompatibility complex, class II, DP alpha 1                                     | Adrenal | 3            |
| LOC103221786     | class I histocompatibility antigen, Gogo-B*0101 alpha chain-like                           | Adrenal | 3            |
| LOC103221843     | HLA class I histocompatibility antigen, alpha chain G-like                                 | Adrenal | 3            |
| LOC103222059     | 60S ribosomal protein L3 pseudogene                                                        | Adrenal | 3            |
| LOC103222213     | peptidyl-prolyl cis-trans isomerase A pseudogene                                           | Adrenal | 3            |
| LOC103222346     | uncharacterized LOC103222346                                                               | Adrenal | 3            |
| LOC103222361     | HLA class I histocompatibility antigen, B-14 alpha chain-like                              | Adrenal | 3            |
| LOC103222374     | uncharacterized LOC103222374                                                               | Adrenal | 3            |
| LOC103222418     | 26S protease regulatory subunit 6A pseudogene                                              | Adrenal | 3            |
| LOC103223519     | uncharacterized LOC103223519                                                               | Adrenal | 3            |
| LOC103224452     | 60S ribosomal protein L5 pseudogene                                                        | Adrenal | 3            |
| LOC103224596     | 60S ribosomal protein L29-like                                                             | Adrenal | 3            |
| LOC103224767     | uncharacterized LOC103224767                                                               | Adrenal | 3            |
| LOC103225055     | non-histone chromosomal protein HMG-17 pseudogene                                          | Adrenal | 3            |
| LOC103225263     | uncharacterized LOC103225263                                                               | Adrenal | 3            |
| LOC103225291     | hemoglobin subunit alpha                                                                   | Adrenal | 3            |
| LOC103225416     | BRCA2 and CDKN1A-interacting protein pseudogene                                            | Adrenal | 3            |
| LOC103226462     | 60S ribosomal protein L7a pseudogene                                                       | Adrenal | 3            |
| LOC103226590     | uncharacterized LOC103226590                                                               | Adrenal | 3            |
| LOC103226832     | elongation factor 1-gamma-like                                                             | Adrenal | 3            |
| LOC103226903     | uncharacterized LOC103226903                                                               | Adrenal | 3            |
| LOC103227063     | trypsin-2-like                                                                             | Adrenal | 3            |
| LOC103227729     | serine/threonine-protein phosphatase 2A 56 kDa regulatory subunit gamma isoform pseudogene | Adrenal | 3            |
| LOC103228110     | uncharacterized LOC103228110                                                               | Adrenal | 3            |
| LOC103228978     | uncharacterized LOC103228978                                                               | Adrenal | 3            |
| LOC103229364     | calmodulin-A pseudogene                                                                    | Adrenal | 3            |
| LOC103229828     | putative V-set and immunoglobulin domain-containing-like protein IGHV4OR15-8               | Adrenal | 3            |
| LOC103229860     | homer protein homolog 2 pseudogene                                                         | Adrenal | 3            |
| LOC103229939     | putative V-set and immunoglobulin domain-containing-like protein IGHV4OR15-8               | Adrenal | 3            |
| LOC103229961     | uncharacterized LOC103229961                                                               | Adrenal | 3            |
| LOC103230389     | putative elongation factor 1-alpha-like 3                                                  | Adrenal | 3            |
| LOC103230559     | putative 60S ribosomal protein L37a                                                        | Adrenal | 3            |
| LOC103230632     | uncharacterized LOC103230632                                                               | Adrenal | 3            |
| LOC103230925     | heat shock cognate 71 kDa protein-like                                                     | Adrenal | 3            |
| LOC103231044     | elongation factor 1-alpha 1 pseudogene                                                     | Adrenal | 3            |
| LOC103231559     | trifunctional enzyme subunit beta, mitochondrial-like                                      | Adrenal | 3            |
| LOC103231823     | chloride intracellular channel protein 4 pseudogene                                        | Adrenal | 3            |
| LOC103231930     | uncharacterized LOC103231930                                                               | Adrenal | 3            |
| LOC103232041     | ATP synthase subunit beta, mitochondrial pseudogene                                        | Adrenal | 3            |
| LOC103232191     | uncharacterized LOC103232191                                                               | Adrenal | 3            |
| LOC103232291     | stress-induced-phosphoprotein 1 pseudogene                                                 | Adrenal | 3            |
| LOC103232315     | AP-2 complex subunit beta pseudogene                                                       | Adrenal | 3            |
| LOC103232474     | non-histone chromosomal protein HMG-14 pseudogene                                          | Adrenal | 3            |
| LOC103232530     | cytochrome c oxidase subunit 6A1, mitochondrial pseudogene                                 | Adrenal | 3            |
| LOC103232772     | synaptonemal complex protein 3-like                                                        | Adrenal | 3            |
| LOC103232774     | melanoma-associated antigen 4-like                                                         | Adrenal | 3            |
| LOC103233496     | tubulin beta-3 chain                                                                       | Adrenal | 3            |
| LOC103233816     | C-type lectin domain family 4 member G-like                                                | Adrenal | 3            |
| LOC103234510     | elongation factor 1-alpha 1 pseudogene                                                     | Adrenal | 3            |
| LOC103235197     | 14-3-3 protein epsilon pseudogene                                                          | Adrenal | 3            |
| LOC103235251     | ATP-dependent zinc metalloprotease YME1L1 pseudogene                                       | Adrenal | 3            |
| LOC103235253     | trifunctional enzyme subunit beta, mitochondrial-like                                      | Adrenal | 3            |
| LOC103235262     | leukocyte-associated immunoglobulin-like receptor 2                                        | Adrenal | 3            |
| LOC103236223     | very-long-chain enoyl-CoA reductase pseudogene                                             | Adrenal | 3            |
| LOC103236661     | uncharacterized LOC103236661                                                               | Adrenal | 3            |
| LOC103237018     | 40S ribosomal protein S5 pseudogene                                                        | Adrenal | 3            |
| LOC103237180     | 40S ribosomal protein S18 pseudogene                                                       | Adrenal | 3            |
| LOC103237550     | uncharacterized LOC103237550                                                               | Adrenal | 3            |
| LOC103238179     | uncharacterized LOC103238179                                                               | Adrenal | 3            |
| LOC103238951     | 10 kDa heat shock protein, mitochondrial pseudogene                                        | Adrenal | 3            |
| LOC103239044     | 40S ribosomal protein SA-like                                                              | Adrenal | 3            |
| LOC103239517     | nascent polypeptide-associated complex subunit alpha pseudogene                            | Adrenal | 3            |
| LOC103239891     | transcription factor BTF3 pseudogene                                                       | Adrenal | 3            |
| LOC103240885     | putative transcriptional regulator encoded by LINC00473                                    | Adrenal | 3            |

**Supplementary Table 7. Genes in the top or bottom 10% of loadings on PC 1, PC 2, or PC 3, for tissues where that dimension in PCA showed a clear pattern with sex as illustrated in Figure 1.**

| VervetGeneSymbol | Description                                                            | Tissue  | PC Dimension |
|------------------|------------------------------------------------------------------------|---------|--------------|
| LOC103241006     | elongation factor 1-delta-like                                         | Adrenal | 3            |
| LOC103242126     | transcription initiation factor TFIID subunit 4-like                   | Adrenal | 3            |
| LOC103242380     | ubiquitin-40S ribosomal protein S27a-like                              | Adrenal | 3            |
| LOC103242477     | uncharacterized LOC103242477                                           | Adrenal | 3            |
| LOC103242499     | CMT1A duplicated region transcript 15 protein-like protein             | Adrenal | 3            |
| LOC103243156     | 60S ribosomal protein L17 pseudogene                                   | Adrenal | 3            |
| LOC103243211     | somatotropin                                                           | Adrenal | 3            |
| LOC103244762     | ovomuroid-like                                                         | Adrenal | 3            |
| LOC103245358     | 40S ribosomal protein S17 pseudogene                                   | Adrenal | 3            |
| LOC103245711     | uncharacterized LOC103245711                                           | Adrenal | 3            |
| LOC103246092     | U3 small nucleolar ribonucleoprotein protein MPP10-like                | Adrenal | 3            |
| LOC103246666     | farnesyl pyrophosphate synthase pseudogene                             | Adrenal | 3            |
| LOC103246967     | 40S ribosomal protein S4, Y isoform 1                                  | Adrenal | 3            |
| LOC103246978     | uncharacterized LOC103246978                                           | Adrenal | 3            |
| LOC103246986     | gamma-taxilin-like                                                     | Adrenal | 3            |
| LOC103246988     | eukaryotic translation initiation factor 1A, Y-chromosomal             | Adrenal | 3            |
| LOC103246990     | uncharacterized LOC103246990                                           | Adrenal | 3            |
| LOC103246991     | uncharacterized LOC103246991                                           | Adrenal | 3            |
| LOC103246992     | 40S ribosomal protein S4, Y isoform 1                                  | Adrenal | 3            |
| LOC103248959     | thymosin beta-4 pseudogene                                             | Adrenal | 3            |
| LRR8E            | leucine rich repeat containing 8 family member E                       | Adrenal | 3            |
| LRR8M3           | leucine rich repeat transmembrane neuronal 3                           | Adrenal | 3            |
| MCCD1            | mitochondrial coiled-coil domain 1                                     | Adrenal | 3            |
| MX1              | MX dynamin like GTPase 1                                               | Adrenal | 3            |
| NEFL             | neurofilament light                                                    | Adrenal | 3            |
| NELL2            | neural EGFL like 2                                                     | Adrenal | 3            |
| NLRP2            | NLR family pyrin domain containing 2                                   | Adrenal | 3            |
| NPY              | neuropeptide Y                                                         | Adrenal | 3            |
| NRSN1            | neurensin 1                                                            | Adrenal | 3            |
| NRSN2            | neurensin 2                                                            | Adrenal | 3            |
| NTRK1            | neurotrophic receptor tyrosine kinase 1                                | Adrenal | 3            |
| NXPH1            | neurexophilin 1                                                        | Adrenal | 3            |
| P2RX2            | purinergic receptor P2X 2                                              | Adrenal | 3            |
| PLAC1            | placenta specific 1                                                    | Adrenal | 3            |
| PNMA3            | paraneoplastic Ma antigen 3                                            | Adrenal | 3            |
| POU3F1           | POU class 3 homeobox 1                                                 | Adrenal | 3            |
| PRL              | prolactin                                                              | Adrenal | 3            |
| PRLR             | prolactin receptor                                                     | Adrenal | 3            |
| PRPH             | peripherin                                                             | Adrenal | 3            |
| PRSS2            | protease, serine 2                                                     | Adrenal | 3            |
| PVALB            | parvalbumin                                                            | Adrenal | 3            |
| RELT             | RELT, TNF receptor                                                     | Adrenal | 3            |
| RLN3             | relaxin 3                                                              | Adrenal | 3            |
| SALL4            | spalt like transcription factor 4                                      | Adrenal | 3            |
| SERPINE1         | serpin family E member 1                                               | Adrenal | 3            |
| SHISA2           | shisa family member 2                                                  | Adrenal | 3            |
| SLC18A3          | solute carrier family 18 member A3                                     | Adrenal | 3            |
| SLC24A2          | solute carrier family 24 member 2                                      | Adrenal | 3            |
| SLC8A3           | solute carrier family 8 member A3                                      | Adrenal | 3            |
| SOX30            | SRY-box 30                                                             | Adrenal | 3            |
| SPINK13          | serine peptidase inhibitor, Kazal type 13 (putative)                   | Adrenal | 3            |
| STMN2            | stathmin 2                                                             | Adrenal | 3            |
| SULT2A1          | sulfotransferase family 2A member 1                                    | Adrenal | 3            |
| SYT1             | synaptotagmin 1                                                        | Adrenal | 3            |
| TBX20            | T-box 20                                                               | Adrenal | 3            |
| TECRL            | trans-2,3-enoyl-CoA reductase like                                     | Adrenal | 3            |
| TFAP2B           | transcription factor AP-2 beta                                         | Adrenal | 3            |
| TMEM72           | transmembrane protein 72                                               | Adrenal | 3            |
| TRIM71           | tripartite motif containing 71                                         | Adrenal | 3            |
| TSHB             | thyroid stimulating hormone beta                                       | Adrenal | 3            |
| USP9Y            | ubiquitin specific peptidase 9, Y-linked                               | Adrenal | 3            |
| UTY              | ubiquitously transcribed tetratricopeptide repeat containing, Y-linked | Adrenal | 3            |
| ZFY              | zinc finger protein, Y-linked                                          | Adrenal | 3            |
| ZNF331           | zinc finger protein 331                                                | Adrenal | 3            |
| ANKRD62          | ankyrin repeat domain 62                                               | BA46    | 2            |
| APOL6            | apolipoprotein L6                                                      | BA46    | 2            |
| ATF3             | activating transcription factor 3                                      | BA46    | 2            |
| C1QTNF9          | C1q and TNF related 9                                                  | BA46    | 2            |

**Supplementary Table 7. Genes in the top or bottom 10% of loadings on PC 1, PC 2, or PC 3, for tissues where that dimension in PCA showed a clear pattern with sex as illustrated in Figure 1.**

| VervetGeneSymbol    | Description                                                      | Tissue | PC Dimension |
|---------------------|------------------------------------------------------------------|--------|--------------|
| <i>C20H1orf87</i>   | chromosome 20 open reading frame, human C1orf87                  | BA46   | 2            |
| <i>C26H15orf43</i>  | telomere repeat binding bouquet formation protein 2              | BA46   | 2            |
| <i>C6</i>           | complement C6                                                    | BA46   | 2            |
| <i>C7</i>           | complement C7                                                    | BA46   | 2            |
| <i>CATSPERB</i>     | cation channel sperm associated auxiliary subunit beta           | BA46   | 2            |
| <i>CD74</i>         | CD74 molecule                                                    | BA46   | 2            |
| <i>CETP</i>         | cholesteryl ester transfer protein                               | BA46   | 2            |
| <i>CHRNA3</i>       | cholinergic receptor nicotinic alpha 3 subunit                   | BA46   | 2            |
| <i>CHRNA9</i>       | cholinergic receptor nicotinic alpha 9 subunit                   | BA46   | 2            |
| <i>CILP2</i>        | cartilage intermediate layer protein 2                           | BA46   | 2            |
| <i>CLRN2</i>        | clarin 2                                                         | BA46   | 2            |
| <i>CNDP1</i>        | carnosine dipeptidase 1                                          | BA46   | 2            |
| <i>CNN1</i>         | calponin 1                                                       | BA46   | 2            |
| <i>CPB1</i>         | carboxypeptidase B1                                              | BA46   | 2            |
| <i>CRISP2</i>       | cysteine rich secretory protein 2                                | BA46   | 2            |
| <i>CRISPLD1</i>     | cysteine rich secretory protein LCCL domain containing 1         | BA46   | 2            |
| <i>CTAG2</i>        | cancer/testis antigen 2                                          | BA46   | 2            |
| <i>CXCL10</i>       | C-X-C motif chemokine ligand 10                                  | BA46   | 2            |
| <i>DDX3Y</i>        | DEAD-box helicase 3, Y-linked                                    | BA46   | 2            |
| <i>DDX60</i>        | DEAD/H-box helicase 60                                           | BA46   | 2            |
| <i>DNAJB3</i>       | DnaJ heat shock protein family (Hsp40) member B3                 | BA46   | 2            |
| <i>DPPA5</i>        | developmental pluripotency associated 5                          | BA46   | 2            |
| <i>ELF5</i>         | E74 like ETS transcription factor 5                              | BA46   | 2            |
| <i>FBXO39</i>       | F-box protein 39                                                 | BA46   | 2            |
| <i>FMO3</i>         | flavin containing monooxygenase 3                                | BA46   | 2            |
| <i>GIN5A</i>        | GIN5 complex subunit 4                                           | BA46   | 2            |
| <i>GJB4</i>         | gap junction protein beta 4                                      | BA46   | 2            |
| <i>GPC3</i>         | glypican 3                                                       | BA46   | 2            |
| <i>GPR143</i>       | G protein-coupled receptor 143                                   | BA46   | 2            |
| <i>GPR6</i>         | G protein-coupled receptor 6                                     | BA46   | 2            |
| <i>IFI44</i>        | interferon induced protein 44                                    | BA46   | 2            |
| <i>IFI44L</i>       | interferon induced protein 44 like                               | BA46   | 2            |
| <i>KDM5D</i>        | lysine demethylase 5D                                            | BA46   | 2            |
| <i>KERA</i>         | keratocan                                                        | BA46   | 2            |
| <i>KLK1</i>         | kallikrein 1                                                     | BA46   | 2            |
| <i>KLK15</i>        | kallikrein related peptidase 15                                  | BA46   | 2            |
| <i>KLKB1</i>        | kallikrein B1                                                    | BA46   | 2            |
| <i>KRBOX1</i>       | KRAB box domain containing 1                                     | BA46   | 2            |
| <i>KRT7</i>         | keratin 7                                                        | BA46   | 2            |
| <i>LOC103214547</i> | beta-citrylglutamate synthase B pseudogene                       | BA46   | 2            |
| <i>LOC103214954</i> | uncharacterized LOC103214954                                     | BA46   | 2            |
| <i>LOC103215442</i> | POTE ankyrin domain family member B2-like                        | BA46   | 2            |
| <i>LOC103215612</i> | putative UPF0607 protein ENSP00000382826                         | BA46   | 2            |
| <i>LOC103215615</i> | uncharacterized LOC103215615                                     | BA46   | 2            |
| <i>LOC103215729</i> | uncharacterized LOC103215729                                     | BA46   | 2            |
| <i>LOC103216766</i> | putative vomeronasal receptor-like protein 4                     | BA46   | 2            |
| <i>LOC103216854</i> | uncharacterized LOC103216854                                     | BA46   | 2            |
| <i>LOC103217617</i> | aldehyde oxidase 4-like                                          | BA46   | 2            |
| <i>LOC103217729</i> | gamma-crystallin D                                               | BA46   | 2            |
| <i>LOC103218379</i> | unconventional myosin-Vb pseudogene                              | BA46   | 2            |
| <i>LOC103218546</i> | pregnancy zone protein                                           | BA46   | 2            |
| <i>LOC103219098</i> | uncharacterized LOC103219098                                     | BA46   | 2            |
| <i>LOC103219099</i> | uncharacterized LOC103219099                                     | BA46   | 2            |
| <i>LOC103220153</i> | protein IQ-DOMAIN 14-like                                        | BA46   | 2            |
| <i>LOC103220854</i> | ARF GTPase-activating protein GIT1 pseudogene                    | BA46   | 2            |
| <i>LOC103220953</i> | uncharacterized LOC103220953                                     | BA46   | 2            |
| <i>LOC103221671</i> | uncharacterized LOC103221671                                     | BA46   | 2            |
| <i>LOC103221684</i> | major histocompatibility complex, class II, DO alpha             | BA46   | 2            |
| <i>LOC103221700</i> | HLA class II histocompatibility antigen, DRB1-4 beta chain-like  | BA46   | 2            |
| <i>LOC103221702</i> | HLA class II histocompatibility antigen, DRB1-4 beta chain       | BA46   | 2            |
| <i>LOC103221704</i> | major histocompatibility complex, class II, DR alpha             | BA46   | 2            |
| <i>LOC103221720</i> | tenascin XA (pseudogene)                                         | BA46   | 2            |
| <i>LOC103221773</i> | class I histocompatibility antigen, Gogo-B*0102 alpha chain-like | BA46   | 2            |
| <i>LOC103221779</i> | HLA class I histocompatibility antigen, B-46 alpha chain-like    | BA46   | 2            |
| <i>LOC103221781</i> | class I histocompatibility antigen, Gogo-B*0103 alpha chain-like | BA46   | 2            |
| <i>LOC103221783</i> | HLA class I histocompatibility antigen, B-15 alpha chain-like    | BA46   | 2            |
| <i>LOC103221786</i> | class I histocompatibility antigen, Gogo-B*0101 alpha chain-like | BA46   | 2            |
| <i>LOC103221790</i> | uncharacterized LOC103221790                                     | BA46   | 2            |

**Supplementary Table 7. Genes in the top or bottom 10% of loadings on PC 1, PC 2, or PC 3, for tissues where that dimension in PCA showed a clear pattern with sex as illustrated in Figure 1.**

| VervetGeneSymbol | Description                                                                             | Tissue | PC Dimension |
|------------------|-----------------------------------------------------------------------------------------|--------|--------------|
| LOC103221792     | saoe class I histocompatibility antigen, A alpha chain-like                             | BA46   | 2            |
| LOC103221843     | HLA class I histocompatibility antigen, alpha chain G-like                              | BA46   | 2            |
| LOC103221863     | mamu class I histocompatibility antigen, alpha chain F-like                             | BA46   | 2            |
| LOC103221867     | HLA class I histocompatibility antigen, B-38 alpha chain-like                           | BA46   | 2            |
| LOC103221925     | olfactory receptor 2B6-like                                                             | BA46   | 2            |
| LOC103222083     | uncharacterized LOC103222083                                                            | BA46   | 2            |
| LOC103222361     | HLA class I histocompatibility antigen, B-14 alpha chain-like                           | BA46   | 2            |
| LOC103222365     | putative olfactory receptor 211                                                         | BA46   | 2            |
| LOC103223461     | uncharacterized LOC103223461                                                            | BA46   | 2            |
| LOC103223596     | uncharacterized LOC103223596                                                            | BA46   | 2            |
| LOC103223757     | olfactory receptor 10J1-like                                                            | BA46   | 2            |
| LOC103223762     | olfactory receptor 10J1-like                                                            | BA46   | 2            |
| LOC103224012     | uncharacterized LOC103224012                                                            | BA46   | 2            |
| LOC103224103     | glyceraldehyde-3-phosphate dehydrogenase pseudogene                                     | BA46   | 2            |
| LOC103224105     | glyceraldehyde-3-phosphate dehydrogenase pseudogene                                     | BA46   | 2            |
| LOC103224107     | 3 beta-hydroxysteroid dehydrogenase/Delta 5-->4-isomerase type 1-like                   | BA46   | 2            |
| LOC103224108     | putative RNA polymerase II subunit A C-terminal domain phosphatase SSU72-like protein 2 | BA46   | 2            |
| LOC103224327     | neuroblastoma breakpoint family member 4-like                                           | BA46   | 2            |
| LOC103224379     | high mobility group protein B3 pseudogene                                               | BA46   | 2            |
| LOC103225878     | 3 beta-hydroxysteroid dehydrogenase/Delta 5-->4-isomerase type 1 pseudogene             | BA46   | 2            |
| LOC103225919     | phosphate carrier protein, mitochondrial pseudogene                                     | BA46   | 2            |
| LOC103226029     | ribonuclease T2 pseudogene                                                              | BA46   | 2            |
| LOC103226088     | uncharacterized LOC103226088                                                            | BA46   | 2            |
| LOC103226590     | uncharacterized LOC103226590                                                            | BA46   | 2            |
| LOC103226929     | aldo-keto reductase family 1 member B10-like                                            | BA46   | 2            |
| LOC103226936     | uncharacterized LOC103226936                                                            | BA46   | 2            |
| LOC103227997     | uncharacterized LOC103227997                                                            | BA46   | 2            |
| LOC103228754     | uncharacterized LOC103228754                                                            | BA46   | 2            |
| LOC103231504     | putative golgin subfamily A member 6-like protein 8                                     | BA46   | 2            |
| LOC103231552     | uncharacterized LOC103231552                                                            | BA46   | 2            |
| LOC103231553     | uncharacterized LOC103231553                                                            | BA46   | 2            |
| LOC103231554     | 60S ribosomal protein L24-like                                                          | BA46   | 2            |
| LOC103231593     | zinc finger protein 729-like                                                            | BA46   | 2            |
| LOC103231790     | uncharacterized LOC103231790                                                            | BA46   | 2            |
| LOC103231837     | uncharacterized LOC103231837                                                            | BA46   | 2            |
| LOC103231952     | angiogenic factor with G patch and FHA domains 1 pseudogene                             | BA46   | 2            |
| LOC103232191     | uncharacterized LOC103232191                                                            | BA46   | 2            |
| LOC103233035     | metallothionein-1E-like                                                                 | BA46   | 2            |
| LOC103234401     | zinc finger protein 85-like                                                             | BA46   | 2            |
| LOC103234406     | uncharacterized LOC103234406                                                            | BA46   | 2            |
| LOC103234986     | galactoside 2-alpha-L-fucosyltransferase 2                                              | BA46   | 2            |
| LOC103235388     | uncharacterized LOC103235388                                                            | BA46   | 2            |
| LOC103235584     | UDP-glucuronosyltransferase 2B4-like                                                    | BA46   | 2            |
| LOC103235585     | UDP-glucuronosyltransferase 2B23                                                        | BA46   | 2            |
| LOC103236661     | uncharacterized LOC103236661                                                            | BA46   | 2            |
| LOC103236959     | transient receptor potential cation channel subfamily A member 1-like                   | BA46   | 2            |
| LOC103237729     | uncharacterized protein FLJ40521-like                                                   | BA46   | 2            |
| LOC103237869     | uncharacterized LOC103237869                                                            | BA46   | 2            |
| LOC103238179     | uncharacterized LOC103238179                                                            | BA46   | 2            |
| LOC103239373     | uncharacterized LOC103239373                                                            | BA46   | 2            |
| LOC103240473     | uncharacterized LOC103240473                                                            | BA46   | 2            |
| LOC103240493     | 40S ribosomal protein S24 pseudogene                                                    | BA46   | 2            |
| LOC103240941     | uncharacterized LOC103240941                                                            | BA46   | 2            |
| LOC103242499     | CMT1A duplicated region transcript 15 protein-like protein                              | BA46   | 2            |
| LOC103242671     | uncharacterized LOC103242671                                                            | BA46   | 2            |
| LOC103242716     | uncharacterized LOC103242716                                                            | BA46   | 2            |
| LOC103243248     | leucine-rich repeat-containing protein 37A-like                                         | BA46   | 2            |
| LOC103243770     | uncharacterized LOC103243770                                                            | BA46   | 2            |
| LOC103244037     | uncharacterized LOC103244037                                                            | BA46   | 2            |
| LOC103244121     | uncharacterized LOC103244121                                                            | BA46   | 2            |
| LOC103244746     | uncharacterized LOC103244746                                                            | BA46   | 2            |
| LOC103244873     | uncharacterized LOC103244873                                                            | BA46   | 2            |
| LOC103245207     | golgin subfamily A member 2-like                                                        | BA46   | 2            |
| LOC103245980     | shadow of prion protein-like                                                            | BA46   | 2            |
| LOC103246187     | uncharacterized LOC103246187                                                            | BA46   | 2            |
| LOC103246188     | uncharacterized LOC103246188                                                            | BA46   | 2            |
| LOC103246200     | WD repeat-containing protein 5 pseudogene                                               | BA46   | 2            |
| LOC103246313     | 40S ribosomal protein S7 pseudogene                                                     | BA46   | 2            |

**Supplementary Table 7. Genes in the top or bottom 10% of loadings on PC 1, PC 2, or PC 3, for tissues where that dimension in PCA showed a clear pattern with sex as illustrated in Figure 1.**

| <b>VervetGeneSymbol</b> | <b>Description</b>                                                     | <b>Tissue</b> | <b>PC Dimension</b> |
|-------------------------|------------------------------------------------------------------------|---------------|---------------------|
| <i>LOC103246510</i>     | uncharacterized LOC103246510                                           | BA46          | 2                   |
| <i>LOC103246852</i>     | uncharacterized LOC103246852                                           | BA46          | 2                   |
| <i>LOC103246967</i>     | 40S ribosomal protein S4, Y isoform 1                                  | BA46          | 2                   |
| <i>LOC103246968</i>     | heat shock transcription factor, Y-linked-like                         | BA46          | 2                   |
| <i>LOC103246974</i>     | developmental pluripotency-associated protein 2 pseudogene             | BA46          | 2                   |
| <i>LOC103246975</i>     | uncharacterized LOC103246975                                           | BA46          | 2                   |
| <i>LOC103246978</i>     | uncharacterized LOC103246978                                           | BA46          | 2                   |
| <i>LOC103246979</i>     | ribose-phosphate pyrophosphokinase 2 pseudogene                        | BA46          | 2                   |
| <i>LOC103246980</i>     | uncharacterized LOC103246980                                           | BA46          | 2                   |
| <i>LOC103246982</i>     | acylglycerol kinase, mitochondrial pseudogene                          | BA46          | 2                   |
| <i>LOC103246983</i>     | neuroligin-4, X-linked-like                                            | BA46          | 2                   |
| <i>LOC103246986</i>     | gamma-taxilin-like                                                     | BA46          | 2                   |
| <i>LOC103246988</i>     | eukaryotic translation initiation factor 1A, Y-chromosomal             | BA46          | 2                   |
| <i>LOC103246990</i>     | uncharacterized LOC103246990                                           | BA46          | 2                   |
| <i>LOC103246991</i>     | uncharacterized LOC103246991                                           | BA46          | 2                   |
| <i>LOC103246992</i>     | 40S ribosomal protein S4, Y isoform 1                                  | BA46          | 2                   |
| <i>LOC103246998</i>     | ankyrin repeat domain-containing protein 37 pseudogene                 | BA46          | 2                   |
| <i>LOC103247901</i>     | hemoglobin subunit beta                                                | BA46          | 2                   |
| <i>LTF</i>              | lactotransferrin                                                       | BA46          | 2                   |
| <i>LY6K</i>             | lymphocyte antigen 6 family member K                                   | BA46          | 2                   |
| <i>MALRD1</i>           | MAM and LDL receptor class A domain containing 1                       | BA46          | 2                   |
| <i>MB21D1</i>           | Mab-21 domain containing 1                                             | BA46          | 2                   |
| <i>MDFI</i>             | MyoD family inhibitor                                                  | BA46          | 2                   |
| <i>MEOX1</i>            | mesenchyme homeobox 1                                                  | BA46          | 2                   |
| <i>MGP</i>              | matrix Gla protein                                                     | BA46          | 2                   |
| <i>MS4A6A</i>           | membrane spanning 4-domains A6A                                        | BA46          | 2                   |
| <i>MSH5</i>             | mutS homolog 5                                                         | BA46          | 2                   |
| <i>MUSK</i>             | muscle associated receptor tyrosine kinase                             | BA46          | 2                   |
| <i>MX2</i>              | MX dynamin like GTPase 2                                               | BA46          | 2                   |
| <i>MYOC</i>             | myocilin                                                               | BA46          | 2                   |
| <i>NHLH2</i>            | nescient helix-loop-helix 2                                            | BA46          | 2                   |
| <i>NR5A2</i>            | nuclear receptor subfamily 5 group A member 2                          | BA46          | 2                   |
| <i>OAS2</i>             | 2'-5'-oligoadenylate synthetase 2                                      | BA46          | 2                   |
| <i>PAX7</i>             | paired box 7                                                           | BA46          | 2                   |
| <i>PKP1</i>             | plakophilin 1                                                          | BA46          | 2                   |
| <i>PRSS45</i>           | protease, serine 45                                                    | BA46          | 2                   |
| <i>PTPN20B</i>          | protein tyrosine phosphatase, non-receptor type 20                     | BA46          | 2                   |
| <i>RGS21</i>            | regulator of G-protein signaling 21                                    | BA46          | 2                   |
| <i>SERPINB13</i>        | serpin family B member 13                                              | BA46          | 2                   |
| <i>SLC16A12</i>         | solute carrier family 16 member 12                                     | BA46          | 2                   |
| <i>SPDYE4</i>           | speedy/RINGO cell cycle regulator family member E4                     | BA46          | 2                   |
| <i>STC2</i>             | stanniocalcin 2                                                        | BA46          | 2                   |
| <i>SYCE1</i>            | synaptonemal complex central element protein 1                         | BA46          | 2                   |
| <i>SYTL1</i>            | synaptotagmin like 1                                                   | BA46          | 2                   |
| <i>TDRD5</i>            | tudor domain containing 5                                              | BA46          | 2                   |
| <i>TDRD9</i>            | tudor domain containing 9                                              | BA46          | 2                   |
| <i>THEMIS</i>           | thymocyte selection associated                                         | BA46          | 2                   |
| <i>TICRR</i>            | TOPBP1 interacting checkpoint and replication regulator                | BA46          | 2                   |
| <i>TMEM125</i>          | transmembrane protein 125                                              | BA46          | 2                   |
| <i>TPO</i>              | thyroid peroxidase                                                     | BA46          | 2                   |
| <i>TRNAP-AGG</i>        | transfer RNA proline (anticodon AGG)                                   | BA46          | 2                   |
| <i>UGT3A1</i>           | UDP glycosyltransferase family 3 member A1                             | BA46          | 2                   |
| <i>USP9Y</i>            | ubiquitin specific peptidase 9, Y-linked                               | BA46          | 2                   |
| <i>UTY</i>              | ubiquitously transcribed tetratricopeptide repeat containing, Y-linked | BA46          | 2                   |
| <i>VGLL2</i>            | vestigial like family member 2                                         | BA46          | 2                   |
| <i>XAF1</i>             | XIAP associated factor 1                                               | BA46          | 2                   |
| <i>XIRP2</i>            | xin actin binding repeat containing 2                                  | BA46          | 2                   |
| <i>XPNPEP2</i>          | X-prolyl aminopeptidase 2                                              | BA46          | 2                   |
| <i>ZFP57</i>            | ZFP57 zinc finger protein                                              | BA46          | 2                   |
| <i>ZFY</i>              | zinc finger protein, Y-linked                                          | BA46          | 2                   |
| <i>ADCYAP1</i>          | adenylate cyclase activating polypeptide 1                             | Caudate       | 2                   |
| <i>AGPAT9</i>           | glycerol-3-phosphate acyltransferase 3                                 | Caudate       | 2                   |
| <i>AGT</i>              | angiotensinogen                                                        | Caudate       | 2                   |
| <i>ANKRD30A</i>         | ankyrin repeat domain 30A                                              | Caudate       | 2                   |
| <i>ANKRD62</i>          | ankyrin repeat domain 62                                               | Caudate       | 2                   |
| <i>ARHGEF38</i>         | Rho guanine nucleotide exchange factor 38                              | Caudate       | 2                   |
| <i>ASPM</i>             | abnormal spindle microtubule assembly                                  | Caudate       | 2                   |
| <i>BUB1</i>             | BUB1 mitotic checkpoint serine/threonine kinase                        | Caudate       | 2                   |

**Supplementary Table 7. Genes in the top or bottom 10% of loadings on PC 1, PC 2, or PC 3, for tissues where that dimension in PCA showed a clear pattern with sex as illustrated in Figure 1.**

| VervetGeneSymbol    | Description                                                        | Tissue  | PC Dimension |
|---------------------|--------------------------------------------------------------------|---------|--------------|
| <i>C17H6orf10</i>   | chromosome 17 open reading frame, human C6orf10                    | Caudate | 2            |
| <i>CILP2</i>        | cartilage intermediate layer protein 2                             | Caudate | 2            |
| <i>CNDP1</i>        | carnosine dipeptidase 1                                            | Caudate | 2            |
| <i>COL6A5</i>       | collagen type VI alpha 5 chain                                     | Caudate | 2            |
| <i>CPB1</i>         | carboxypeptidase B1                                                | Caudate | 2            |
| <i>CPS1</i>         | carbamoyl-phosphate synthase 1                                     | Caudate | 2            |
| <i>CXCL11</i>       | C-X-C motif chemokine ligand 11                                    | Caudate | 2            |
| <i>DDX3Y</i>        | DEAD-box helicase 3, Y-linked                                      | Caudate | 2            |
| <i>DMP1</i>         | dentin matrix acidic phosphoprotein 1                              | Caudate | 2            |
| <i>DNAJB3</i>       | DnaJ heat shock protein family (Hsp40) member B3                   | Caudate | 2            |
| <i>DPEP3</i>        | dipeptidase 3                                                      | Caudate | 2            |
| <i>DPPA5</i>        | developmental pluripotency associated 5                            | Caudate | 2            |
| <i>DSP</i>          | desmoplakin                                                        | Caudate | 2            |
| <i>ERVMER34-1</i>   | endogenous retrovirus group MER34 member 1, envelope               | Caudate | 2            |
| <i>FAM163B</i>      | family with sequence similarity 163 member B                       | Caudate | 2            |
| <i>FAT2</i>         | FAT atypical cadherin 2                                            | Caudate | 2            |
| <i>FCAR</i>         | Fc fragment of IgA receptor                                        | Caudate | 2            |
| <i>GABRA6</i>       | gamma-aminobutyric acid type A receptor alpha6 subunit             | Caudate | 2            |
| <i>GADL1</i>        | glutamate decarboxylase like 1                                     | Caudate | 2            |
| <i>GJD2</i>         | gap junction protein delta 2                                       | Caudate | 2            |
| <i>GPR143</i>       | G protein-coupled receptor 143                                     | Caudate | 2            |
| <i>HAPLN4</i>       | hyaluronan and proteoglycan link protein 4                         | Caudate | 2            |
| <i>HOXD3</i>        | homeobox D3                                                        | Caudate | 2            |
| <i>HSF4</i>         | heat shock transcription factor 4                                  | Caudate | 2            |
| <i>HTRA3</i>        | HtrA serine peptidase 3                                            | Caudate | 2            |
| <i>IL23R</i>        | interleukin 23 receptor                                            | Caudate | 2            |
| <i>IRX3</i>         | iroquois homeobox 3                                                | Caudate | 2            |
| <i>ISLR</i>         | immunoglobulin superfamily containing leucine rich repeat          | Caudate | 2            |
| <i>ITK</i>          | IL2 inducible T-cell kinase                                        | Caudate | 2            |
| <i>KDM5D</i>        | lysine demethylase 5D                                              | Caudate | 2            |
| <i>KLHL4</i>        | kelch like family member 4                                         | Caudate | 2            |
| <i>KLK1</i>         | kallikrein 1                                                       | Caudate | 2            |
| <i>KLK15</i>        | kallikrein related peptidase 15                                    | Caudate | 2            |
| <i>KRBOX1</i>       | KRAB box domain containing 1                                       | Caudate | 2            |
| <i>LOC103214240</i> | uncharacterized LOC103214240                                       | Caudate | 2            |
| <i>LOC103214954</i> | uncharacterized LOC103214954                                       | Caudate | 2            |
| <i>LOC103215075</i> | succinyl-CoA ligase [GDP-forming] subunit beta, mitochondrial-like | Caudate | 2            |
| <i>LOC103215493</i> | uncharacterized LOC103215493                                       | Caudate | 2            |
| <i>LOC103215615</i> | uncharacterized LOC103215615                                       | Caudate | 2            |
| <i>LOC103216172</i> | uncharacterized LOC103216172                                       | Caudate | 2            |
| <i>LOC103216766</i> | putative vomeronasal receptor-like protein 4                       | Caudate | 2            |
| <i>LOC103216848</i> | uncharacterized LOC103216848                                       | Caudate | 2            |
| <i>LOC103216882</i> | cytochrome P450 family 27 subfamily C member 1                     | Caudate | 2            |
| <i>LOC103217040</i> | uncharacterized LOC103217040                                       | Caudate | 2            |
| <i>LOC103218057</i> | uncharacterized LOC103218057                                       | Caudate | 2            |
| <i>LOC103218206</i> | olfactory receptor 6B3                                             | Caudate | 2            |
| <i>LOC103218379</i> | unconventional myosin-Vb pseudogene                                | Caudate | 2            |
| <i>LOC103218511</i> | C-type lectin domain family 4 member C-like                        | Caudate | 2            |
| <i>LOC103218545</i> | alpha-2-macroglobulin-like                                         | Caudate | 2            |
| <i>LOC103218697</i> | uncharacterized LOC103218697                                       | Caudate | 2            |
| <i>LOC103218793</i> | uncharacterized LOC103218793                                       | Caudate | 2            |
| <i>LOC103218849</i> | C-type lectin domain family 4 member C pseudogene                  | Caudate | 2            |
| <i>LOC103218865</i> | C-type lectin domain family 4 member C-like                        | Caudate | 2            |
| <i>LOC103219098</i> | uncharacterized LOC103219098                                       | Caudate | 2            |
| <i>LOC103219657</i> | uncharacterized LOC103219657                                       | Caudate | 2            |
| <i>LOC103220361</i> | uncharacterized LOC103220361                                       | Caudate | 2            |
| <i>LOC103220719</i> | aryl hydrocarbon receptor-like                                     | Caudate | 2            |
| <i>LOC103220953</i> | uncharacterized LOC103220953                                       | Caudate | 2            |
| <i>LOC103220966</i> | uncharacterized LOC103220966                                       | Caudate | 2            |
| <i>LOC103221007</i> | uncharacterized LOC103221007                                       | Caudate | 2            |
| <i>LOC103221295</i> | uncharacterized LOC103221295                                       | Caudate | 2            |
| <i>LOC103221683</i> | major histocompatibility complex, class II, DP alpha 1             | Caudate | 2            |
| <i>LOC103221696</i> | major histocompatibility complex, class II, DQ beta 1              | Caudate | 2            |
| <i>LOC103221700</i> | HLA class II histocompatibility antigen, DRB1-4 beta chain-like    | Caudate | 2            |
| <i>LOC103221702</i> | HLA class II histocompatibility antigen, DRB1-4 beta chain         | Caudate | 2            |
| <i>LOC103221703</i> | DLA class II histocompatibility antigen, DR-1 beta chain-like      | Caudate | 2            |
| <i>LOC103221705</i> | heterogeneous nuclear ribonucleoprotein A1-like                    | Caudate | 2            |
| <i>LOC103221720</i> | tenascin XA (pseudogene)                                           | Caudate | 2            |

**Supplementary Table 7. Genes in the top or bottom 10% of loadings on PC 1, PC 2, or PC 3, for tissues where that dimension in PCA showed a clear pattern with sex as illustrated in Figure 1.**

| VervetGeneSymbol | Description                                                                | Tissue  | PC Dimension |
|------------------|----------------------------------------------------------------------------|---------|--------------|
| LOC103221724     | cytochrome P450 family 21 subfamily A member 2                             | Caudate | 2            |
| LOC103221773     | class I histocompatibility antigen, Gogo-B*0102 alpha chain-like           | Caudate | 2            |
| LOC103221779     | HLA class I histocompatibility antigen, B-46 alpha chain-like              | Caudate | 2            |
| LOC103221781     | class I histocompatibility antigen, Gogo-B*0103 alpha chain-like           | Caudate | 2            |
| LOC103221783     | HLA class I histocompatibility antigen, B-15 alpha chain-like              | Caudate | 2            |
| LOC103221786     | class I histocompatibility antigen, Gogo-B*0101 alpha chain-like           | Caudate | 2            |
| LOC103221792     | saoe class I histocompatibility antigen, A alpha chain-like                | Caudate | 2            |
| LOC103221843     | HLA class I histocompatibility antigen, alpha chain G-like                 | Caudate | 2            |
| LOC103221863     | mamu class I histocompatibility antigen, alpha chain F-like                | Caudate | 2            |
| LOC103221864     | keratin, type II cytoskeletal 8 pseudogene                                 | Caudate | 2            |
| LOC103221867     | HLA class I histocompatibility antigen, B-38 alpha chain-like              | Caudate | 2            |
| LOC103221876     | olfactory receptor 2H2-like                                                | Caudate | 2            |
| LOC103221924     | putative olfactory receptor 2W6                                            | Caudate | 2            |
| LOC103221925     | olfactory receptor 2B6-like                                                | Caudate | 2            |
| LOC103221927     | olfactory receptor 2B2-like                                                | Caudate | 2            |
| LOC103221933     | histone cluster 1, H2bo                                                    | Caudate | 2            |
| LOC103221937     | histone H2B type 1-M                                                       | Caudate | 2            |
| LOC103221944     | histone cluster 1, H1b                                                     | Caudate | 2            |
| LOC103222079     | uncharacterized LOC103222079                                               | Caudate | 2            |
| LOC103222083     | uncharacterized LOC103222083                                               | Caudate | 2            |
| LOC103222279     | uncharacterized LOC103222279                                               | Caudate | 2            |
| LOC103222361     | HLA class I histocompatibility antigen, B-14 alpha chain-like              | Caudate | 2            |
| LOC103223315     | uncharacterized LOC103223315                                               | Caudate | 2            |
| LOC103224012     | uncharacterized LOC103224012                                               | Caudate | 2            |
| LOC103224456     | uncharacterized LOC103224456                                               | Caudate | 2            |
| LOC103224846     | putative selection and upkeep of intraepithelial T-cells protein 1 homolog | Caudate | 2            |
| LOC103225919     | phosphate carrier protein, mitochondrial pseudogene                        | Caudate | 2            |
| LOC103226029     | ribonuclease T2 pseudogene                                                 | Caudate | 2            |
| LOC103226041     | uncharacterized LOC103226041                                               | Caudate | 2            |
| LOC103227848     | uncharacterized LOC103227848                                               | Caudate | 2            |
| LOC103227916     | uncharacterized LOC103227916                                               | Caudate | 2            |
| LOC103227997     | uncharacterized LOC103227997                                               | Caudate | 2            |
| LOC103228240     | uncharacterized LOC103228240                                               | Caudate | 2            |
| LOC103228374     | uncharacterized LOC103228374                                               | Caudate | 2            |
| LOC103229265     | disintegrin and metalloproteinase domain-containing protein 20-like        | Caudate | 2            |
| LOC103229673     | uncharacterized LOC103229673                                               | Caudate | 2            |
| LOC103231241     | uncharacterized LOC103231241                                               | Caudate | 2            |
| LOC103231552     | uncharacterized LOC103231552                                               | Caudate | 2            |
| LOC103231553     | uncharacterized LOC103231553                                               | Caudate | 2            |
| LOC103231554     | 60S ribosomal protein L24-like                                             | Caudate | 2            |
| LOC103231593     | zinc finger protein 729-like                                               | Caudate | 2            |
| LOC103232191     | uncharacterized LOC103232191                                               | Caudate | 2            |
| LOC103233032     | metallothionein-2-like                                                     | Caudate | 2            |
| LOC103233547     | uncharacterized LOC103233547                                               | Caudate | 2            |
| LOC103234252     | zinc finger protein 676-like                                               | Caudate | 2            |
| LOC103235585     | UDP-glucuronosyltransferase 2B23                                           | Caudate | 2            |
| LOC103235936     | uncharacterized LOC103235936                                               | Caudate | 2            |
| LOC103235937     | uncharacterized LOC103235937                                               | Caudate | 2            |
| LOC103236042     | uncharacterized LOC103236042                                               | Caudate | 2            |
| LOC103236044     | uncharacterized LOC103236044                                               | Caudate | 2            |
| LOC103236253     | uncharacterized LOC103236253                                               | Caudate | 2            |
| LOC103236371     | ankyrin repeat domain-containing protein 30A-like                          | Caudate | 2            |
| LOC103236499     | keratin, type II cytoskeletal 8-like                                       | Caudate | 2            |
| LOC103236661     | uncharacterized LOC103236661                                               | Caudate | 2            |
| LOC103236959     | transient receptor potential cation channel subfamily A member 1-like      | Caudate | 2            |
| LOC103237663     | olfactory receptor 2V1                                                     | Caudate | 2            |
| LOC103239373     | uncharacterized LOC103239373                                               | Caudate | 2            |
| LOC103239374     | uncharacterized LOC103239374                                               | Caudate | 2            |
| LOC103239458     | NHP2-like protein 1 pseudogene                                             | Caudate | 2            |
| LOC103239535     | uncharacterized LOC103239535                                               | Caudate | 2            |
| LOC103240343     | uncharacterized LOC103240343                                               | Caudate | 2            |
| LOC103241392     | uncharacterized LOC103241392                                               | Caudate | 2            |
| LOC103241524     | uncharacterized LOC103241524                                               | Caudate | 2            |
| LOC103241538     | uncharacterized LOC103241538                                               | Caudate | 2            |
| LOC103242499     | CMT1A duplicated region transcript 15 protein-like protein                 | Caudate | 2            |
| LOC103242547     | olfactory receptor 3A1                                                     | Caudate | 2            |
| LOC103242588     | uncharacterized LOC103242588                                               | Caudate | 2            |
| LOC103242716     | uncharacterized LOC103242716                                               | Caudate | 2            |

**Supplementary Table 7. Genes in the top or bottom 10% of loadings on PC 1, PC 2, or PC 3, for tissues where that dimension in PCA showed a clear pattern with sex as illustrated in Figure 1.**

| VervetGeneSymbol | Description                                                            | Tissue      | PC Dimension |
|------------------|------------------------------------------------------------------------|-------------|--------------|
| LOC103243101     | uncharacterized LOC103243101                                           | Caudate     | 2            |
| LOC103243247     | endophilin-A2 pseudogene                                               | Caudate     | 2            |
| LOC103243248     | leucine-rich repeat-containing protein 37A-like                        | Caudate     | 2            |
| LOC103244770     | uncharacterized LOC103244770                                           | Caudate     | 2            |
| LOC103246347     | uncharacterized protein C9orf78 pseudogene                             | Caudate     | 2            |
| LOC103246967     | 40S ribosomal protein S4, Y isoform 1                                  | Caudate     | 2            |
| LOC103246968     | heat shock transcription factor, Y-linked-like                         | Caudate     | 2            |
| LOC103246974     | developmental pluripotency-associated protein 2 pseudogene             | Caudate     | 2            |
| LOC103246975     | uncharacterized LOC103246975                                           | Caudate     | 2            |
| LOC103246978     | uncharacterized LOC103246978                                           | Caudate     | 2            |
| LOC103246979     | ribose-phosphate pyrophosphokinase 2 pseudogene                        | Caudate     | 2            |
| LOC103246980     | uncharacterized LOC103246980                                           | Caudate     | 2            |
| LOC103246982     | acylglycerol kinase, mitochondrial pseudogene                          | Caudate     | 2            |
| LOC103246983     | neuroligin-4, X-linked-like                                            | Caudate     | 2            |
| LOC103246986     | gamma-taxilin-like                                                     | Caudate     | 2            |
| LOC103246988     | eukaryotic translation initiation factor 1A, Y-chromosomal             | Caudate     | 2            |
| LOC103246990     | uncharacterized LOC103246990                                           | Caudate     | 2            |
| LOC103246991     | uncharacterized LOC103246991                                           | Caudate     | 2            |
| LOC103246992     | 40S ribosomal protein S4, Y isoform 1                                  | Caudate     | 2            |
| LOC103246998     | ankyrin repeat domain-containing protein 37 pseudogene                 | Caudate     | 2            |
| LOC103247901     | hemoglobin subunit beta                                                | Caudate     | 2            |
| LOC103248295     | uncharacterized LOC103248295                                           | Caudate     | 2            |
| LOC103248363     | caspase-1-like                                                         | Caudate     | 2            |
| LOC103248486     | uncharacterized LOC103248486                                           | Caudate     | 2            |
| MBL2             | mannose binding lectin 2                                               | Caudate     | 2            |
| MLPH             | melanophilin                                                           | Caudate     | 2            |
| MUC22            | mucin 22                                                               | Caudate     | 2            |
| MYBL2            | MYB proto-oncogene like 2                                              | Caudate     | 2            |
| NEUROD1          | neuronal differentiation 1                                             | Caudate     | 2            |
| NKX3-1           | NK3 homeobox 1                                                         | Caudate     | 2            |
| OXTR             | oxytocin receptor                                                      | Caudate     | 2            |
| P2RX1            | purinergic receptor P2X 1                                              | Caudate     | 2            |
| PLA2G2F          | phospholipase A2 group IIF                                             | Caudate     | 2            |
| PPAP2C           | phospholipid phosphatase 2                                             | Caudate     | 2            |
| PRL              | prolactin                                                              | Caudate     | 2            |
| PTPN20B          | protein tyrosine phosphatase, non-receptor type 20                     | Caudate     | 2            |
| SECTM1           | secreted and transmembrane 1                                           | Caudate     | 2            |
| SHCBP1           | SHC binding and spindle associated 1                                   | Caudate     | 2            |
| SLC17A3          | solute carrier family 17 member 3                                      | Caudate     | 2            |
| SLC17A6          | solute carrier family 17 member 6                                      | Caudate     | 2            |
| SLC6A5           | solute carrier family 6 member 5                                       | Caudate     | 2            |
| SP8              | Sp8 transcription factor                                               | Caudate     | 2            |
| STYK1            | serine/threonine/tyrosine kinase 1                                     | Caudate     | 2            |
| TESPA1           | thymocyte expressed, positive selection associated 1                   | Caudate     | 2            |
| THEG             | theg spermatid protein                                                 | Caudate     | 2            |
| TMEM235          | transmembrane protein 235                                              | Caudate     | 2            |
| TPO              | thyroid peroxidase                                                     | Caudate     | 2            |
| TRHR             | thyrotropin releasing hormone receptor                                 | Caudate     | 2            |
| TRPC5            | transient receptor potential cation channel subfamily C member 5       | Caudate     | 2            |
| TSPAN2           | tetraspanin 2                                                          | Caudate     | 2            |
| TSPEAR           | thrombospondin type laminin G domain and EAR repeats                   | Caudate     | 2            |
| USP9Y            | ubiquitin specific peptidase 9, Y-linked                               | Caudate     | 2            |
| UTY              | ubiquitously transcribed tetratricopeptide repeat containing, Y-linked | Caudate     | 2            |
| WNT9B            | Wnt family member 9B                                                   | Caudate     | 2            |
| ZFP57            | ZFP57 zinc finger protein                                              | Caudate     | 2            |
| ZFY              | zinc finger protein, Y-linked                                          | Caudate     | 2            |
| ABCA13           | ATP binding cassette subfamily A member 13                             | Hippocampus | 1            |
| ALOX15           | arachidonate 15-lipoxygenase                                           | Hippocampus | 1            |
| ANKRD30A         | ankyrin repeat domain 30A                                              | Hippocampus | 1            |
| ARHGEF38         | Rho guanine nucleotide exchange factor 38                              | Hippocampus | 1            |
| ATP6V0D2         | ATPase H <sup>+</sup> transporting V0 subunit d2                       | Hippocampus | 1            |
| AVPR1A           | arginine vasopressin receptor 1A                                       | Hippocampus | 1            |
| C12H9orf135      | chromosome 12 open reading frame, human C9orf135                       | Hippocampus | 1            |
| C20H1orf141      | chromosome 20 open reading frame, human C1orf141                       | Hippocampus | 1            |
| CAPSL            | calcyphosine like                                                      | Hippocampus | 1            |
| CCR6             | C-C motif chemokine receptor 6                                         | Hippocampus | 1            |
| CHRNA9           | cholinergic receptor nicotinic alpha 9 subunit                         | Hippocampus | 1            |
| CLCA2            | chloride channel accessory 2                                           | Hippocampus | 1            |



**Supplementary Table 7. Genes in the top or bottom 10% of loadings on PC 1, PC 2, or PC 3, for tissues where that dimension in PCA showed a clear pattern with sex as illustrated in Figure 1.**

| <b>VervetGeneSymbol</b> | <b>Description</b>                                                | <b>Tissue</b> | <b>PC Dimension</b> |
|-------------------------|-------------------------------------------------------------------|---------------|---------------------|
| <i>CLRN2</i>            | clarin 2                                                          | Hippocampus   | 1                   |
| <i>CNDP1</i>            | carnosine dipeptidase 1                                           | Hippocampus   | 1                   |
| <i>CNGB3</i>            | cyclic nucleotide gated channel beta 3                            | Hippocampus   | 1                   |
| <i>CNN1</i>             | calponin 1                                                        | Hippocampus   | 1                   |
| <i>COL1A1</i>           | collagen type I alpha 1 chain                                     | Hippocampus   | 1                   |
| <i>COMP</i>             | cartilage oligomeric matrix protein                               | Hippocampus   | 1                   |
| <i>CPAMD8</i>           | C3 and PZP like, alpha-2-macroglobulin domain containing 8        | Hippocampus   | 1                   |
| <i>CPZ</i>              | carboxypeptidase Z                                                | Hippocampus   | 1                   |
| <i>CTAG2</i>            | cancer/testis antigen 2                                           | Hippocampus   | 1                   |
| <i>DDX3Y</i>            | DEAD-box helicase 3, Y-linked                                     | Hippocampus   | 1                   |
| <i>DMP1</i>             | dentin matrix acidic phosphoprotein 1                             | Hippocampus   | 1                   |
| <i>DNAJB3</i>           | DnaJ heat shock protein family (Hsp40) member B3                  | Hippocampus   | 1                   |
| <i>DRAXIN</i>           | dorsal inhibitory axon guidance protein                           | Hippocampus   | 1                   |
| <i>EBF3</i>             | early B-cell factor 3                                             | Hippocampus   | 1                   |
| <i>FERD3L</i>           | Fer3 like bHLH transcription factor                               | Hippocampus   | 1                   |
| <i>FFAR2</i>            | free fatty acid receptor 2                                        | Hippocampus   | 1                   |
| <i>FMO2</i>             | flavin containing monooxygenase 2                                 | Hippocampus   | 1                   |
| <i>FREM3</i>            | FRAS1 related extracellular matrix 3                              | Hippocampus   | 1                   |
| <i>GPR101</i>           | G protein-coupled receptor 101                                    | Hippocampus   | 1                   |
| <i>GPR111</i>           | adhesion G protein-coupled receptor F2                            | Hippocampus   | 1                   |
| <i>GPR142</i>           | G protein-coupled receptor 142                                    | Hippocampus   | 1                   |
| <i>HTATIP2</i>          | HIV-1 Tat interactive protein 2                                   | Hippocampus   | 1                   |
| <i>IFI44</i>            | interferon induced protein 44                                     | Hippocampus   | 1                   |
| <i>IL23R</i>            | interleukin 23 receptor                                           | Hippocampus   | 1                   |
| <i>ISG15</i>            | ISG15 ubiquitin-like modifier                                     | Hippocampus   | 1                   |
| <i>ISLR</i>             | immunoglobulin superfamily containing leucine rich repeat         | Hippocampus   | 1                   |
| <i>KDM5D</i>            | lysine demethylase 5D                                             | Hippocampus   | 1                   |
| <i>KLK1</i>             | kallikrein 1                                                      | Hippocampus   | 1                   |
| <i>KLK15</i>            | kallikrein related peptidase 15                                   | Hippocampus   | 1                   |
| <i>KRBOX1</i>           | KRAB box domain containing 1                                      | Hippocampus   | 1                   |
| <i>LCK</i>              | LCK proto-oncogene, Src family tyrosine kinase                    | Hippocampus   | 1                   |
| <i>LOC103214649</i>     | uncharacterized LOC103214649                                      | Hippocampus   | 1                   |
| <i>LOC103214759</i>     | uncharacterized LOC103214759                                      | Hippocampus   | 1                   |
| <i>LOC103214761</i>     | uncharacterized LOC103214761                                      | Hippocampus   | 1                   |
| <i>LOC103214881</i>     | asparagine synthetase [glutamine-hydrolyzing] pseudogene          | Hippocampus   | 1                   |
| <i>LOC103214916</i>     | uncharacterized LOC103214916                                      | Hippocampus   | 1                   |
| <i>LOC103214934</i>     | uncharacterized LOC103214934                                      | Hippocampus   | 1                   |
| <i>LOC103214935</i>     | uncharacterized LOC103214935                                      | Hippocampus   | 1                   |
| <i>LOC103215125</i>     | uncharacterized LOC103215125                                      | Hippocampus   | 1                   |
| <i>LOC103215127</i>     | uncharacterized LOC103215127                                      | Hippocampus   | 1                   |
| <i>LOC103215284</i>     | uncharacterized LOC103215284                                      | Hippocampus   | 1                   |
| <i>LOC103215442</i>     | POTE ankyrin domain family member B2-like                         | Hippocampus   | 1                   |
| <i>LOC103215729</i>     | uncharacterized LOC103215729                                      | Hippocampus   | 1                   |
| <i>LOC103215730</i>     | putative ankyrin repeat domain-containing protein ENSP00000330211 | Hippocampus   | 1                   |
| <i>LOC103215870</i>     | putative BMS1-like protein                                        | Hippocampus   | 1                   |
| <i>LOC103217614</i>     | uncharacterized LOC103217614                                      | Hippocampus   | 1                   |
| <i>LOC103217729</i>     | gamma-crystallin D                                                | Hippocampus   | 1                   |
| <i>LOC103217805</i>     | uncharacterized LOC103217805                                      | Hippocampus   | 1                   |
| <i>LOC103218206</i>     | olfactory receptor 6B3                                            | Hippocampus   | 1                   |
| <i>LOC103218320</i>     | ATP-binding cassette transporter 13                               | Hippocampus   | 1                   |
| <i>LOC103218379</i>     | unconventional myosin-Vb pseudogene                               | Hippocampus   | 1                   |
| <i>LOC103218399</i>     | uncharacterized LOC103218399                                      | Hippocampus   | 1                   |
| <i>LOC103218597</i>     | taste 2 receptor member 8                                         | Hippocampus   | 1                   |
| <i>LOC103218793</i>     | uncharacterized LOC103218793                                      | Hippocampus   | 1                   |
| <i>LOC103219091</i>     | uncharacterized LOC103219091                                      | Hippocampus   | 1                   |
| <i>LOC103219652</i>     | uncharacterized protein FLJ46757-like                             | Hippocampus   | 1                   |
| <i>LOC103219692</i>     | uncharacterized LOC103219692                                      | Hippocampus   | 1                   |
| <i>LOC103220953</i>     | uncharacterized LOC103220953                                      | Hippocampus   | 1                   |
| <i>LOC103221225</i>     | uncharacterized LOC103221225                                      | Hippocampus   | 1                   |
| <i>LOC103221683</i>     | major histocompatibility complex, class II, DP alpha 1            | Hippocampus   | 1                   |
| <i>LOC103221700</i>     | HLA class II histocompatibility antigen, DRB1-4 beta chain-like   | Hippocampus   | 1                   |
| <i>LOC103221720</i>     | tenascin XA (pseudogene)                                          | Hippocampus   | 1                   |
| <i>LOC103221773</i>     | class I histocompatibility antigen, Gogo-B*0102 alpha chain-like  | Hippocampus   | 1                   |
| <i>LOC103221779</i>     | HLA class I histocompatibility antigen, B-46 alpha chain-like     | Hippocampus   | 1                   |
| <i>LOC103221786</i>     | class I histocompatibility antigen, Gogo-B*0101 alpha chain-like  | Hippocampus   | 1                   |
| <i>LOC103221843</i>     | HLA class I histocompatibility antigen, alpha chain G-like        | Hippocampus   | 1                   |
| <i>LOC103221867</i>     | HLA class I histocompatibility antigen, B-38 alpha chain-like     | Hippocampus   | 1                   |
| <i>LOC103222066</i>     | uncharacterized LOC103222066                                      | Hippocampus   | 1                   |

**Supplementary Table 7. Genes in the top or bottom 10% of loadings on PC 1, PC 2, or PC 3, for tissues where that dimension in PCA showed a clear pattern with sex as illustrated in Figure 1.**

| VervetGeneSymbol | Description                                                                             | Tissue      | PC Dimension |
|------------------|-----------------------------------------------------------------------------------------|-------------|--------------|
| LOC103222086     | 60S ribosomal protein L29 pseudogene                                                    | Hippocampus | 1            |
| LOC103222279     | uncharacterized LOC103222279                                                            | Hippocampus | 1            |
| LOC103222322     | uncharacterized LOC103222322                                                            | Hippocampus | 1            |
| LOC103222465     | RNA polymerase II transcription factor SIII subunit A3-like                             | Hippocampus | 1            |
| LOC103222493     | inhibitor of Bruton tyrosine kinase pseudogene                                          | Hippocampus | 1            |
| LOC103222914     | immunoglobulin omega chain-like                                                         | Hippocampus | 1            |
| LOC103223611     | atrophin-1 pseudogene                                                                   | Hippocampus | 1            |
| LOC103224012     | uncharacterized LOC103224012                                                            | Hippocampus | 1            |
| LOC103224097     | glyceraldehyde-3-phosphate dehydrogenase pseudogene                                     | Hippocampus | 1            |
| LOC103224107     | 3 beta-hydroxysteroid dehydrogenase/Delta 5-->4-isomerase type 1-like                   | Hippocampus | 1            |
| LOC103224108     | putative RNA polymerase II subunit A C-terminal domain phosphatase SSU72-like protein 2 | Hippocampus | 1            |
| LOC103224355     | uncharacterized LOC103224355                                                            | Hippocampus | 1            |
| LOC103224886     | vitamin D3 hydroxylase-associated protein-like                                          | Hippocampus | 1            |
| LOC103225263     | uncharacterized LOC103225263                                                            | Hippocampus | 1            |
| LOC103225907     | omega-amidase NIT2 pseudogene                                                           | Hippocampus | 1            |
| LOC103225919     | phosphate carrier protein, mitochondrial pseudogene                                     | Hippocampus | 1            |
| LOC103226041     | uncharacterized LOC103226041                                                            | Hippocampus | 1            |
| LOC103226088     | uncharacterized LOC103226088                                                            | Hippocampus | 1            |
| LOC103226903     | uncharacterized LOC103226903                                                            | Hippocampus | 1            |
| LOC103226931     | aldo-keto reductase family 1 member B10                                                 | Hippocampus | 1            |
| LOC103227329     | protein-L-isoaspartate O-methyltransferase domain-containing protein 1 pseudogene       | Hippocampus | 1            |
| LOC103228545     | uncharacterized LOC103228545                                                            | Hippocampus | 1            |
| LOC103228547     | uncharacterized LOC103228547                                                            | Hippocampus | 1            |
| LOC103228548     | uncharacterized LOC103228548                                                            | Hippocampus | 1            |
| LOC103228982     | cofilin-2 pseudogene                                                                    | Hippocampus | 1            |
| LOC103229122     | uncharacterized LOC103229122                                                            | Hippocampus | 1            |
| LOC103229662     | uncharacterized LOC103229662                                                            | Hippocampus | 1            |
| LOC103229673     | uncharacterized LOC103229673                                                            | Hippocampus | 1            |
| LOC103230925     | heat shock cognate 71 kDa protein-like                                                  | Hippocampus | 1            |
| LOC103231011     | glutamyl-tRNA(Gln) amidotransferase subunit A, mitochondrial pseudogene                 | Hippocampus | 1            |
| LOC103231099     | ubiquitin-conjugating enzyme E2 Q2-like                                                 | Hippocampus | 1            |
| LOC103231241     | uncharacterized LOC103231241                                                            | Hippocampus | 1            |
| LOC103231244     | uncharacterized LOC103231244                                                            | Hippocampus | 1            |
| LOC103231512     | double homeobox protein 4C-like                                                         | Hippocampus | 1            |
| LOC103231553     | uncharacterized LOC103231553                                                            | Hippocampus | 1            |
| LOC103231593     | zinc finger protein 729-like                                                            | Hippocampus | 1            |
| LOC103231952     | angiogenic factor with G patch and FHA domains 1 pseudogene                             | Hippocampus | 1            |
| LOC103232191     | uncharacterized LOC103232191                                                            | Hippocampus | 1            |
| LOC103232192     | uncharacterized LOC103232192                                                            | Hippocampus | 1            |
| LOC103232524     | actin-related protein T1-like                                                           | Hippocampus | 1            |
| LOC103233776     | tubulin beta-4A chain-like                                                              | Hippocampus | 1            |
| LOC103234223     | PHD finger-like domain-containing protein 5A pseudogene                                 | Hippocampus | 1            |
| LOC103234401     | zinc finger protein 85-like                                                             | Hippocampus | 1            |
| LOC103234406     | uncharacterized LOC103234406                                                            | Hippocampus | 1            |
| LOC103235014     | choriogonadotropin subunit beta                                                         | Hippocampus | 1            |
| LOC103235584     | UDP-glucuronosyltransferase 2B4-like                                                    | Hippocampus | 1            |
| LOC103235585     | UDP-glucuronosyltransferase 2B23                                                        | Hippocampus | 1            |
| LOC103236371     | ankyrin repeat domain-containing protein 30A-like                                       | Hippocampus | 1            |
| LOC103236500     | uncharacterized LOC103236500                                                            | Hippocampus | 1            |
| LOC103236604     | uncharacterized LOC103236604                                                            | Hippocampus | 1            |
| LOC103236661     | uncharacterized LOC103236661                                                            | Hippocampus | 1            |
| LOC103236694     | proliferating cell nuclear antigen pseudogene                                           | Hippocampus | 1            |
| LOC103237370     | uncharacterized LOC103237370                                                            | Hippocampus | 1            |
| LOC103237371     | uncharacterized LOC103237371                                                            | Hippocampus | 1            |
| LOC103237524     | uncharacterized LOC103237524                                                            | Hippocampus | 1            |
| LOC103239390     | uncharacterized LOC103239390                                                            | Hippocampus | 1            |
| LOC103239520     | elongation factor 1-alpha 1 pseudogene                                                  | Hippocampus | 1            |
| LOC103239649     | beta-lactoglobulin-1-like                                                               | Hippocampus | 1            |
| LOC103241059     | glycerol-3-phosphate acyltransferase 2, mitochondrial                                   | Hippocampus | 1            |
| LOC103241171     | uncharacterized LOC103241171                                                            | Hippocampus | 1            |
| LOC103241834     | putative uncharacterized protein UNQ6490/PRO21339                                       | Hippocampus | 1            |
| LOC103242256     | uncharacterized LOC103242256                                                            | Hippocampus | 1            |
| LOC103242499     | CMT1A duplicated region transcript 15 protein-like protein                              | Hippocampus | 1            |
| LOC103242588     | uncharacterized LOC103242588                                                            | Hippocampus | 1            |
| LOC103242716     | uncharacterized LOC103242716                                                            | Hippocampus | 1            |
| LOC103243948     | solute carrier family 25 member 51-like                                                 | Hippocampus | 1            |
| LOC103244016     | uncharacterized LOC103244016                                                            | Hippocampus | 1            |
| LOC103244018     | vegetative cell wall protein gp1-like                                                   | Hippocampus | 1            |

**Supplementary Table 7. Genes in the top or bottom 10% of loadings on PC 1, PC 2, or PC 3, for tissues where that dimension in PCA showed a clear pattern with sex as illustrated in Figure 1.**

| VervetGeneSymbol | Description                                                             | Tissue      | PC Dimension |
|------------------|-------------------------------------------------------------------------|-------------|--------------|
| LOC103245914     | uncharacterized LOC103245914                                            | Hippocampus | 1            |
| LOC103246085     | NADH dehydrogenase [ubiquinone] 1 beta subcomplex subunit 10 pseudogene | Hippocampus | 1            |
| LOC103246296     | uncharacterized LOC103246296                                            | Hippocampus | 1            |
| LOC103246967     | 40S ribosomal protein S4, Y isoform 1                                   | Hippocampus | 1            |
| LOC103246968     | heat shock transcription factor, Y-linked-like                          | Hippocampus | 1            |
| LOC103246974     | developmental pluripotency-associated protein 2 pseudogene              | Hippocampus | 1            |
| LOC103246975     | uncharacterized LOC103246975                                            | Hippocampus | 1            |
| LOC103246978     | uncharacterized LOC103246978                                            | Hippocampus | 1            |
| LOC103246979     | ribose-phosphate pyrophosphokinase 2 pseudogene                         | Hippocampus | 1            |
| LOC103246980     | uncharacterized LOC103246980                                            | Hippocampus | 1            |
| LOC103246981     | anosmin-1-like                                                          | Hippocampus | 1            |
| LOC103246982     | acylglycerol kinase, mitochondrial pseudogene                           | Hippocampus | 1            |
| LOC103246983     | neuroligin-4, X-linked-like                                             | Hippocampus | 1            |
| LOC103246984     | uncharacterized LOC103246984                                            | Hippocampus | 1            |
| LOC103246986     | gamma-taxilin-like                                                      | Hippocampus | 1            |
| LOC103246988     | eukaryotic translation initiation factor 1A, Y-chromosomal              | Hippocampus | 1            |
| LOC103246990     | uncharacterized LOC103246990                                            | Hippocampus | 1            |
| LOC103246991     | uncharacterized LOC103246991                                            | Hippocampus | 1            |
| LOC103246992     | 40S ribosomal protein S4, Y isoform 1                                   | Hippocampus | 1            |
| LOC103246998     | ankyrin repeat domain-containing protein 37 pseudogene                  | Hippocampus | 1            |
| LOC103248933     | caspase-1-like                                                          | Hippocampus | 1            |
| LY6K             | lymphocyte antigen 6 family member K                                    | Hippocampus | 1            |
| MKI67            | marker of proliferation Ki-67                                           | Hippocampus | 1            |
| MORC1            | MORC family CW-type zinc finger 1                                       | Hippocampus | 1            |
| MSH5             | mutS homolog 5                                                          | Hippocampus | 1            |
| NEUROG3          | neurogenin 3                                                            | Hippocampus | 1            |
| NPBWR1           | neuropeptides B and W receptor 1                                        | Hippocampus | 1            |
| NTSR1            | neurotensin receptor 1                                                  | Hippocampus | 1            |
| OAS1             | 2'-5'-oligoadenylate synthetase 1                                       | Hippocampus | 1            |
| OPN4             | opsin 4                                                                 | Hippocampus | 1            |
| PDYN             | prodynorphin                                                            | Hippocampus | 1            |
| PIWIL2           | piwi like RNA-mediated gene silencing 2                                 | Hippocampus | 1            |
| PRDM7            | PR/SET domain 7                                                         | Hippocampus | 1            |
| PTPN20B          | protein tyrosine phosphatase, non-receptor type 20                      | Hippocampus | 1            |
| SHCBP1           | SHC binding and spindle associated 1                                    | Hippocampus | 1            |
| SIX3             | SIX homeobox 3                                                          | Hippocampus | 1            |
| SLC22A12         | solute carrier family 22 member 12                                      | Hippocampus | 1            |
| SLC5A7           | solute carrier family 5 member 7                                        | Hippocampus | 1            |
| SPATA22          | spermatogenesis associated 22                                           | Hippocampus | 1            |
| SYNDIG1L         | synapse differentiation inducing 1 like                                 | Hippocampus | 1            |
| T                | T brachyury transcription factor                                        | Hippocampus | 1            |
| TDRD1            | tudor domain containing 1                                               | Hippocampus | 1            |
| THEG             | theg spermatid protein                                                  | Hippocampus | 1            |
| TNIP3            | TNFAIP3 interacting protein 3                                           | Hippocampus | 1            |
| TPO              | thyroid peroxidase                                                      | Hippocampus | 1            |
| UGT3A1           | UDP glycosyltransferase family 3 member A1                              | Hippocampus | 1            |
| ULBP1            | UL16 binding protein 1                                                  | Hippocampus | 1            |
| USP9Y            | ubiquitin specific peptidase 9, Y-linked                                | Hippocampus | 1            |
| UTY              | ubiquitously transcribed tetratricopeptide repeat containing, Y-linked  | Hippocampus | 1            |
| WDR72            | WD repeat domain 72                                                     | Hippocampus | 1            |
| WFDC1            | WAP four-disulfide core domain 1                                        | Hippocampus | 1            |
| ZFY              | zinc finger protein, Y-linked                                           | Hippocampus | 1            |
| A2ML1            | alpha-2-macroglobulin like 1                                            | Pituitary   | 1            |
| ACTG2            | actin, gamma 2, smooth muscle, enteric                                  | Pituitary   | 1            |
| ADAMTS20         | ADAM metallopeptidase with thrombospondin type 1 motif 20               | Pituitary   | 1            |
| AGXT             | alanine-glyoxylate aminotransferase                                     | Pituitary   | 1            |
| APOA2            | apolipoprotein A2                                                       | Pituitary   | 1            |
| ATF3             | activating transcription factor 3                                       | Pituitary   | 1            |
| AZU1             | azurocidin 1                                                            | Pituitary   | 1            |
| BPI              | bactericidal/permeability-increasing protein                            | Pituitary   | 1            |
| BPIFB4           | BPI fold containing family B member 4                                   | Pituitary   | 1            |
| C1H11orf86       | chromosome 1 open reading frame, human C11orf86                         | Pituitary   | 1            |
| CA1              | carbonic anhydrase 1                                                    | Pituitary   | 1            |
| CAMP             | cathelicidin antimicrobial peptide                                      | Pituitary   | 1            |
| CARTPT           | CART prepropeptide                                                      | Pituitary   | 1            |
| CCDC68           | coiled-coil domain containing 68                                        | Pituitary   | 1            |
| CDH9             | cadherin 9                                                              | Pituitary   | 1            |
| CDHR1            | cadherin related family member 1                                        | Pituitary   | 1            |

**Supplementary Table 7. Genes in the top or bottom 10% of loadings on PC 1, PC 2, or PC 3, for tissues where that dimension in PCA showed a clear pattern with sex as illustrated in Figure 1.**

| VervetGeneSymbol | Description                                                      | Tissue    | PC Dimension |
|------------------|------------------------------------------------------------------|-----------|--------------|
| CHP2             | calcineurin like EF-hand protein 2                               | Pituitary | 1            |
| CNN1             | calponin 1                                                       | Pituitary | 1            |
| COL19A1          | collagen type XIX alpha 1 chain                                  | Pituitary | 1            |
| CRISP3           | cysteine rich secretory protein 3                                | Pituitary | 1            |
| CST5             | cystatin D                                                       | Pituitary | 1            |
| CTSG             | cathepsin G                                                      | Pituitary | 1            |
| DDX3Y            | DEAD-box helicase 3, Y-linked                                    | Pituitary | 1            |
| DEFA1            | defensin alpha 1                                                 | Pituitary | 1            |
| DHH              | desert hedgehog                                                  | Pituitary | 1            |
| DMKN             | dermokine                                                        | Pituitary | 1            |
| DNAJB3           | DnaJ heat shock protein family (Hsp40) member B3                 | Pituitary | 1            |
| ELANE            | elastase, neutrophil expressed                                   | Pituitary | 1            |
| ESPNL            | espin-like                                                       | Pituitary | 1            |
| FGF19            | fibroblast growth factor 19                                      | Pituitary | 1            |
| FLG2             | filaggrin family member 2                                        | Pituitary | 1            |
| FMO3             | flavin containing monooxygenase 3                                | Pituitary | 1            |
| FOSB             | FosB proto-oncogene, AP-1 transcription factor subunit           | Pituitary | 1            |
| FSHB             | follicle stimulating hormone beta subunit                        | Pituitary | 1            |
| FTHL17           | ferritin heavy chain like 17                                     | Pituitary | 1            |
| GFY              | golgi associated olfactory signaling regulator                   | Pituitary | 1            |
| GIPR             | gastric inhibitory polypeptide receptor                          | Pituitary | 1            |
| HAND2            | heart and neural crest derivatives expressed 2                   | Pituitary | 1            |
| HAVCR1           | hepatitis A virus cellular receptor 1                            | Pituitary | 1            |
| HEMGN            | hemogen                                                          | Pituitary | 1            |
| IAPP             | islet amyloid polypeptide                                        | Pituitary | 1            |
| ISM2             | isthmin 2                                                        | Pituitary | 1            |
| ITGAX            | integrin subunit alpha X                                         | Pituitary | 1            |
| KDM5D            | lysine demethylase 5D                                            | Pituitary | 1            |
| KLHL1            | kelch like family member 1                                       | Pituitary | 1            |
| KLK3             | kallikrein related peptidase 3                                   | Pituitary | 1            |
| KRBOX1           | KRAB box domain containing 1                                     | Pituitary | 1            |
| LOC103215303     | theta defensin subunit A                                         | Pituitary | 1            |
| LOC103215747     | serine/threonine-protein kinase tousled-like 2                   | Pituitary | 1            |
| LOC103216175     | fer-1-like 4 (C. elegans)                                        | Pituitary | 1            |
| LOC103216821     | mitochondrial import receptor subunit TOM22 homolog pseudogene   | Pituitary | 1            |
| LOC103217729     | gamma-crystallin D                                               | Pituitary | 1            |
| LOC103218057     | uncharacterized LOC103218057                                     | Pituitary | 1            |
| LOC103218363     | uncharacterized LOC103218363                                     | Pituitary | 1            |
| LOC103218379     | unconventional myosin-Vb pseudogene                              | Pituitary | 1            |
| LOC103218546     | pregnancy zone protein                                           | Pituitary | 1            |
| LOC103218625     | basic salivary proline-rich protein 1-like                       | Pituitary | 1            |
| LOC103218626     | basic salivary proline-rich protein 1-like                       | Pituitary | 1            |
| LOC103218629     | basic salivary proline-rich protein 1-like                       | Pituitary | 1            |
| LOC103218630     | basic salivary proline-rich protein 1-like                       | Pituitary | 1            |
| LOC103218706     | elongation factor 1-alpha 1 pseudogene                           | Pituitary | 1            |
| LOC103219103     | uncharacterized LOC103219103                                     | Pituitary | 1            |
| LOC103219314     | ADP/ATP translocase 3-like                                       | Pituitary | 1            |
| LOC103219987     | lithostathine-1-alpha                                            | Pituitary | 1            |
| LOC103220320     | ubiquitin-40S ribosomal protein S27a pseudogene                  | Pituitary | 1            |
| LOC103220426     | uncharacterized LOC103220426                                     | Pituitary | 1            |
| LOC103220845     | extensin-like                                                    | Pituitary | 1            |
| LOC103220953     | uncharacterized LOC103220953                                     | Pituitary | 1            |
| LOC103221597     | heterogeneous nuclear ribonucleoprotein H-like                   | Pituitary | 1            |
| LOC103221683     | major histocompatibility complex, class II, DP alpha 1           | Pituitary | 1            |
| LOC103221773     | class I histocompatibility antigen, Gogo-B*0102 alpha chain-like | Pituitary | 1            |
| LOC103221779     | HLA class I histocompatibility antigen, B-46 alpha chain-like    | Pituitary | 1            |
| LOC103221786     | class I histocompatibility antigen, Gogo-B*0101 alpha chain-like | Pituitary | 1            |
| LOC103221791     | uncharacterized LOC103221791                                     | Pituitary | 1            |
| LOC103221843     | HLA class I histocompatibility antigen, alpha chain G-like       | Pituitary | 1            |
| LOC103221863     | mamu class I histocompatibility antigen, alpha chain F-like      | Pituitary | 1            |
| LOC103221867     | HLA class I histocompatibility antigen, B-38 alpha chain-like    | Pituitary | 1            |
| LOC103222059     | 60S ribosomal protein L3 pseudogene                              | Pituitary | 1            |
| LOC103222242     | uncharacterized LOC103222242                                     | Pituitary | 1            |
| LOC103222803     | phosphomannomutase 2-like                                        | Pituitary | 1            |
| LOC103223466     | uncharacterized LOC103223466                                     | Pituitary | 1            |
| LOC103225055     | non-histone chromosomal protein HMG-17 pseudogene                | Pituitary | 1            |
| LOC103225263     | uncharacterized LOC103225263                                     | Pituitary | 1            |
| LOC103225291     | hemoglobin subunit alpha                                         | Pituitary | 1            |

**Supplementary Table 7. Genes in the top or bottom 10% of loadings on PC 1, PC 2, or PC 3, for tissues where that dimension in PCA showed a clear pattern with sex as illustrated in Figure 1.**

| VervetGeneSymbol | Description                                                                                | Tissue    | PC Dimension |
|------------------|--------------------------------------------------------------------------------------------|-----------|--------------|
| LOC103225416     | BRCA2 and CDKN1A-interacting protein pseudogene                                            | Pituitary | 1            |
| LOC103225474     | 40S ribosomal protein S14 pseudogene                                                       | Pituitary | 1            |
| LOC103225656     | 60S ribosomal protein L7-like                                                              | Pituitary | 1            |
| LOC103225919     | phosphate carrier protein, mitochondrial pseudogene                                        | Pituitary | 1            |
| LOC103226375     | ATP-binding cassette sub-family E member 1 pseudogene                                      | Pituitary | 1            |
| LOC103226579     | Golgi apparatus membrane protein TVP23 homolog B pseudogene                                | Pituitary | 1            |
| LOC103226903     | uncharacterized LOC103226903                                                               | Pituitary | 1            |
| LOC103227729     | serine/threonine-protein phosphatase 2A 56 kDa regulatory subunit gamma isoform pseudogene | Pituitary | 1            |
| LOC103229447     | uncharacterized LOC103229447                                                               | Pituitary | 1            |
| LOC103229828     | putative V-set and immunoglobulin domain-containing-like protein IGHV4OR15-8               | Pituitary | 1            |
| LOC103229848     | Ig heavy chain V-III region VH26-like                                                      | Pituitary | 1            |
| LOC103230114     | uncharacterized LOC103230114                                                               | Pituitary | 1            |
| LOC103230143     | extensin-1                                                                                 | Pituitary | 1            |
| LOC103230442     | tRNA (uracil(54)-C(5))-methyltransferase homolog pseudogene                                | Pituitary | 1            |
| LOC103231553     | uncharacterized LOC103231553                                                               | Pituitary | 1            |
| LOC103231559     | trifunctional enzyme subunit beta, mitochondrial-like                                      | Pituitary | 1            |
| LOC103232041     | ATP synthase subunit beta, mitochondrial pseudogene                                        | Pituitary | 1            |
| LOC103232191     | uncharacterized LOC103232191                                                               | Pituitary | 1            |
| LOC103232315     | AP-2 complex subunit beta pseudogene                                                       | Pituitary | 1            |
| LOC103233555     | uncharacterized LOC103233555                                                               | Pituitary | 1            |
| LOC103233753     | ran-binding protein 3-like                                                                 | Pituitary | 1            |
| LOC103234078     | cytochrome P450 4F8                                                                        | Pituitary | 1            |
| LOC103234079     | leukotriene-B(4) omega-hydroxylase 2                                                       | Pituitary | 1            |
| LOC103235251     | ATP-dependent zinc metalloprotease YME1L1 pseudogene                                       | Pituitary | 1            |
| LOC103235270     | leukocyte-associated immunoglobulin-like receptor 2                                        | Pituitary | 1            |
| LOC103235584     | UDP-glucuronosyltransferase 2B4-like                                                       | Pituitary | 1            |
| LOC103235585     | UDP-glucuronosyltransferase 2B23                                                           | Pituitary | 1            |
| LOC103236661     | uncharacterized LOC103236661                                                               | Pituitary | 1            |
| LOC103236796     | mitogen-activated protein kinase 6 pseudogene                                              | Pituitary | 1            |
| LOC103237018     | 40S ribosomal protein S5 pseudogene                                                        | Pituitary | 1            |
| LOC103238014     | uncharacterized LOC103238014                                                               | Pituitary | 1            |
| LOC103238626     | glyceraldehyde-3-phosphate dehydrogenase pseudogene                                        | Pituitary | 1            |
| LOC103239662     | ficolin-2                                                                                  | Pituitary | 1            |
| LOC103240185     | uncharacterized LOC103240185                                                               | Pituitary | 1            |
| LOC103241059     | glycerol-3-phosphate acyltransferase 2, mitochondrial                                      | Pituitary | 1            |
| LOC103241700     | collagen alpha-4(VI) chain-like                                                            | Pituitary | 1            |
| LOC103242499     | CMT1A duplicated region transcript 15 protein-like protein                                 | Pituitary | 1            |
| LOC103242716     | uncharacterized LOC103242716                                                               | Pituitary | 1            |
| LOC103243233     | angiotensin-converting enzyme-like                                                         | Pituitary | 1            |
| LOC103243247     | endophilin-A2 pseudogene                                                                   | Pituitary | 1            |
| LOC103243248     | leucine-rich repeat-containing protein 37A-like                                            | Pituitary | 1            |
| LOC103246105     | splicing factor 45 pseudogene                                                              | Pituitary | 1            |
| LOC103246281     | uncharacterized LOC103246281                                                               | Pituitary | 1            |
| LOC103246424     | uncharacterized LOC103246424                                                               | Pituitary | 1            |
| LOC103246666     | farnesyl pyrophosphate synthase pseudogene                                                 | Pituitary | 1            |
| LOC103246884     | homeobox protein unc-4 homolog                                                             | Pituitary | 1            |
| LOC103246964     | homeobox protein unc-4 homolog                                                             | Pituitary | 1            |
| LOC103246967     | 40S ribosomal protein S4, Y isoform 1                                                      | Pituitary | 1            |
| LOC103246968     | heat shock transcription factor, Y-linked-like                                             | Pituitary | 1            |
| LOC103246975     | uncharacterized LOC103246975                                                               | Pituitary | 1            |
| LOC103246978     | uncharacterized LOC103246978                                                               | Pituitary | 1            |
| LOC103246979     | ribose-phosphate pyrophosphokinase 2 pseudogene                                            | Pituitary | 1            |
| LOC103246980     | uncharacterized LOC103246980                                                               | Pituitary | 1            |
| LOC103246983     | neuroligin-4, X-linked-like                                                                | Pituitary | 1            |
| LOC103246986     | gamma-taxilin-like                                                                         | Pituitary | 1            |
| LOC103246988     | eukaryotic translation initiation factor 1A, Y-chromosomal                                 | Pituitary | 1            |
| LOC103246990     | uncharacterized LOC103246990                                                               | Pituitary | 1            |
| LOC103246991     | uncharacterized LOC103246991                                                               | Pituitary | 1            |
| LOC103246992     | 40S ribosomal protein S4, Y isoform 1                                                      | Pituitary | 1            |
| LOC103247001     | heat shock transcription factor, Y-linked-like                                             | Pituitary | 1            |
| LOC103247901     | hemoglobin subunit beta                                                                    | Pituitary | 1            |
| LOC103247968     | voltage-dependent anion-selective channel protein 1 pseudogene                             | Pituitary | 1            |
| LOC103247990     | folate receptor gamma                                                                      | Pituitary | 1            |
| LOC103249008     | uncharacterized LOC103249008                                                               | Pituitary | 1            |
| MMP8             | matrix metalloproteinase 8                                                                 | Pituitary | 1            |
| MSLN             | mesothelin                                                                                 | Pituitary | 1            |
| MUC6             | mucin 6, oligomeric mucus/gel-forming                                                      | Pituitary | 1            |
| MYOC             | myocilin                                                                                   | Pituitary | 1            |

**Supplementary Table 7. Genes in the top or bottom 10% of loadings on PC 1, PC 2, or PC 3, for tissues where that dimension in PCA showed a clear pattern with sex as illustrated in Figure 1.**

| <b>VervetGeneSymbol</b> | <b>Description</b>                                                     | <b>Tissue</b> | <b>PC Dimension</b> |
|-------------------------|------------------------------------------------------------------------|---------------|---------------------|
| <i>NPTX2</i>            | neuronal pentraxin 2                                                   | Pituitary     | 1                   |
| <i>NR1H4</i>            | nuclear receptor subfamily 1 group H member 4                          | Pituitary     | 1                   |
| <i>NR1I3</i>            | nuclear receptor subfamily 1 group I member 3                          | Pituitary     | 1                   |
| <i>ORM1</i>             | orosomucoid 1                                                          | Pituitary     | 1                   |
| <i>OTOL1</i>            | otolin 1                                                               | Pituitary     | 1                   |
| <i>PADI4</i>            | peptidyl arginine deiminase 4                                          | Pituitary     | 1                   |
| <i>PCP4L1</i>           | Purkinje cell protein 4 like 1                                         | Pituitary     | 1                   |
| <i>PLSCR5</i>           | phospholipid scramblase family member 5                                | Pituitary     | 1                   |
| <i>PRB4</i>             | proline rich protein BstNI subfamily 4                                 | Pituitary     | 1                   |
| <i>PRDM6</i>            | PR/SET domain 6                                                        | Pituitary     | 1                   |
| <i>PRG2</i>             | proteoglycan 2, pro eosinophil major basic protein                     | Pituitary     | 1                   |
| <i>PRTN3</i>            | proteinase 3                                                           | Pituitary     | 1                   |
| <i>PTGER2</i>           | prostaglandin E receptor 2                                             | Pituitary     | 1                   |
| <i>PTPN20B</i>          | protein tyrosine phosphatase, non-receptor type 20                     | Pituitary     | 1                   |
| <i>PTPRH</i>            | protein tyrosine phosphatase, receptor type H                          | Pituitary     | 1                   |
| <i>QRFP</i>             | pyroglutamylated RFamide peptide receptor                              | Pituitary     | 1                   |
| <i>RASGRP3</i>          | RAS guanyl releasing protein 3                                         | Pituitary     | 1                   |
| <i>S100A8</i>           | S100 calcium binding protein A8                                        | Pituitary     | 1                   |
| <i>S100A9</i>           | S100 calcium binding protein A9                                        | Pituitary     | 1                   |
| <i>SCGB1D4</i>          | secretoglobin family 1D member 4                                       | Pituitary     | 1                   |
| <i>SERPINA5</i>         | serpin family A member 5                                               | Pituitary     | 1                   |
| <i>SERPINA6</i>         | serpin family A member 6                                               | Pituitary     | 1                   |
| <i>SERPINF2</i>         | serpin family F member 2                                               | Pituitary     | 1                   |
| <i>SHCBP1</i>           | SHC binding and spindle associated 1                                   | Pituitary     | 1                   |
| <i>SLC1A6</i>           | solute carrier family 1 member 6                                       | Pituitary     | 1                   |
| <i>SLC22A6</i>          | solute carrier family 22 member 6                                      | Pituitary     | 1                   |
| <i>SLC22A8</i>          | solute carrier family 22 member 8                                      | Pituitary     | 1                   |
| <i>SLC34A3</i>          | solute carrier family 34 member 3                                      | Pituitary     | 1                   |
| <i>SLC4A1</i>           | solute carrier family 4 member 1 (Diego blood group)                   | Pituitary     | 1                   |
| <i>SLC5A8</i>           | solute carrier family 5 member 8                                       | Pituitary     | 1                   |
| <i>SLC6A20</i>          | solute carrier family 6 member 20                                      | Pituitary     | 1                   |
| <i>SPATA22</i>          | spermatogenesis associated 22                                          | Pituitary     | 1                   |
| <i>SPC25</i>            | SPC25, NDC80 kinetochore complex component                             | Pituitary     | 1                   |
| <i>SPTA1</i>            | spectrin alpha, erythrocytic 1                                         | Pituitary     | 1                   |
| <i>TAC1</i>             | tachykinin precursor 1                                                 | Pituitary     | 1                   |
| <i>THEG</i>             | theg spermatid protein                                                 | Pituitary     | 1                   |
| <i>TMPRSS12</i>         | transmembrane protease, serine 12                                      | Pituitary     | 1                   |
| <i>TPH2</i>             | tryptophan hydroxylase 2                                               | Pituitary     | 1                   |
| <i>TYRP1</i>            | tyrosinase related protein 1                                           | Pituitary     | 1                   |
| <i>USP26</i>            | ubiquitin specific peptidase 26                                        | Pituitary     | 1                   |
| <i>USP9Y</i>            | ubiquitin specific peptidase 9, Y-linked                               | Pituitary     | 1                   |
| <i>UTY</i>              | ubiquitously transcribed tetratricopeptide repeat containing, Y-linked | Pituitary     | 1                   |
| <i>VASH2</i>            | vasohibin 2                                                            | Pituitary     | 1                   |
| <i>VGLL2</i>            | vestigial like family member 2                                         | Pituitary     | 1                   |
| <i>ZFY</i>              | zinc finger protein, Y-linked                                          | Pituitary     | 1                   |
| <i>ZIC1</i>             | Zic family member 1                                                    | Pituitary     | 1                   |
| <i>ZIC2</i>             | Zic family member 2                                                    | Pituitary     | 1                   |
| <i>ZIC4</i>             | Zic family member 4                                                    | Pituitary     | 1                   |

**Supplementary Table 8. Genes in the top or bottom 10% of loadings on PC 1 for Caudate and BA46, where that dimension in PCA showed a clear pattern with age as illustrated in Figure 1.**

| <b>VervetGeneSymbol</b> | <b>Description</b>                                              | <b>Tissue</b> | <b>PC Dimension</b> |
|-------------------------|-----------------------------------------------------------------|---------------|---------------------|
| <i>ADAMTS14</i>         | ADAM metallopeptidase with thrombospondin type 1 motif, 14      | BA46          | 1                   |
| <i>AGPAT9</i>           | 1-acylglycerol-3-phosphate O-acyltransferase 9                  | BA46          | 1                   |
| <i>AGT</i>              | angiotensinogen (serpin peptidase inhibitor, clade A, member 8) | BA46          | 1                   |
| <i>AIRE</i>             | autoimmune regulator                                            | BA46          | 1                   |
| <i>ANKRD63</i>          | ankyrin repeat domain 63                                        | BA46          | 1                   |
| <i>ANLN</i>             | anillin, actin binding protein                                  | BA46          | 1                   |
| <i>APOC2</i>            | apolipoprotein C-II                                             | BA46          | 1                   |
| <i>ASB2</i>             | ankyrin repeat and SOCS box containing 2                        | BA46          | 1                   |
| <i>ATP4A</i>            | ATPase, H+/K+ exchanging, alpha polypeptide                     | BA46          | 1                   |
| <i>BARX2</i>            | BARX homeobox 2                                                 | BA46          | 1                   |
| <i>BDKRB1</i>           | bradykinin receptor B1                                          | BA46          | 1                   |
| <i>BDKRB2</i>           | bradykinin receptor B2                                          | BA46          | 1                   |
| <i>BHMT</i>             | betaine--homocysteine S-methyltransferase                       | BA46          | 1                   |
| <i>BHMT2</i>            | betaine--homocysteine S-methyltransferase 2                     | BA46          | 1                   |
| <i>BMP5</i>             | bone morphogenetic protein 5                                    | BA46          | 1                   |
| <i>C14H2orf91</i>       | chromosome 14 open reading frame, human C2orf91                 | BA46          | 1                   |
| <i>C22H3orf56</i>       | chromosome 22 open reading frame, human C3orf56                 | BA46          | 1                   |
| <i>C26H15orf54</i>      | chromosome 26 open reading frame, human C15orf54                | BA46          | 1                   |
| <i>C2H20orf195</i>      | chromosome 2 open reading frame, human C20orf195                | BA46          | 1                   |
| <i>C7</i>               | complement component 7                                          | BA46          | 1                   |
| <i>CACNA1S</i>          | calcium channel, voltage-dependent, L type, alpha 1S subunit    | BA46          | 1                   |
| <i>CARTPT</i>           | CART prepropeptide                                              | BA46          | 1                   |
| <i>CCDC179</i>          | coiled-coil domain containing 179                               | BA46          | 1                   |
| <i>CCR3</i>             | chemokine (C-C motif) receptor 3                                | BA46          | 1                   |
| <i>CD24</i>             | CD24 molecule                                                   | BA46          | 1                   |
| <i>CD96</i>             | CD96 molecule                                                   | BA46          | 1                   |
| <i>CHI3L1</i>           | chitinase 3-like 1 (cartilage glycoprotein-39)                  | BA46          | 1                   |
| <i>CHRNA3</i>           | cholinergic receptor, nicotinic, alpha 3 (neuronal)             | BA46          | 1                   |
| <i>CLIC6</i>            | chloride intracellular channel 6                                | BA46          | 1                   |
| <i>CNDP1</i>            | carnosine dipeptidase 1 (metallopeptidase M20 family)           | BA46          | 1                   |
| <i>COL1A1</i>           | collagen, type I, alpha 1                                       | BA46          | 1                   |
| <i>COL1A2</i>           | collagen, type I, alpha 2                                       | BA46          | 1                   |
| <i>COL3A1</i>           | collagen, type III, alpha 1                                     | BA46          | 1                   |
| <i>COL4A6</i>           | collagen, type IV, alpha 6                                      | BA46          | 1                   |
| <i>COL6A3</i>           | collagen, type VI, alpha 3                                      | BA46          | 1                   |
| <i>CPB1</i>             | carboxypeptidase B1 (tissue)                                    | BA46          | 1                   |
| <i>CPZ</i>              | carboxypeptidase Z                                              | BA46          | 1                   |
| <i>CRISPLD1</i>         | cysteine-rich secretory protein LCCL domain containing 1        | BA46          | 1                   |
| <i>DACT2</i>            | dishevelled-binding antagonist of beta-catenin 2                | BA46          | 1                   |
| <i>DCDC2C</i>           | doublecortin domain containing 2C                               | BA46          | 1                   |
| <i>DPYSL3</i>           | dihydropyrimidinase-like 3                                      | BA46          | 1                   |
| <i>DPYSL5</i>           | dihydropyrimidinase-like 5                                      | BA46          | 1                   |
| <i>DRAXIN</i>           | dorsal inhibitory axon guidance protein                         | BA46          | 1                   |
| <i>DSP</i>              | desmoplakin                                                     | BA46          | 1                   |
| <i>DTL</i>              | denticleless E3 ubiquitin protein ligase homolog (Drosophila)   | BA46          | 1                   |
| <i>EMILIN3</i>          | elastin microfibril interfacier 3                               | BA46          | 1                   |
| <i>ERMN</i>             | ermin, ERM-like protein                                         | BA46          | 1                   |
| <i>ETNPPL</i>           | ethanolamine-phosphate phospho-lyase                            | BA46          | 1                   |
| <i>FAM132A</i>          | family with sequence similarity 132, member A                   | BA46          | 1                   |
| <i>FAM159B</i>          | family with sequence similarity 159, member B                   | BA46          | 1                   |
| <i>FCN3</i>             | ficolin (collagen/fibrinogen domain containing) 3               | BA46          | 1                   |
| <i>FERD3L</i>           | Fer3-like bHLH transcription factor                             | BA46          | 1                   |
| <i>FNDC1</i>            | fibronectin type III domain containing 1                        | BA46          | 1                   |
| <i>FOXI3</i>            | forkhead box I3                                                 | BA46          | 1                   |
| <i>FREM3</i>            | FRAS1 related extracellular matrix 3                            | BA46          | 1                   |
| <i>FST</i>              | follistatin                                                     | BA46          | 1                   |

**Supplementary Table 8. Genes in the top or bottom 10% of loadings on PC 1 for Caudate and BA46, where that dimension in PCA showed a clear pattern with age as illustrated in Figure 1.**

| <b>VervetGeneSymbol</b> | <b>Description</b>                                                        | <b>Tissue</b> | <b>PC Dimension</b> |
|-------------------------|---------------------------------------------------------------------------|---------------|---------------------|
| <i>GALNT5</i>           | polypeptide N-acetylgalactosaminyltransferase 5                           | BA46          | 1                   |
| <i>GDF10</i>            | growth differentiation factor 10                                          | BA46          | 1                   |
| <i>GJB1</i>             | gap junction protein, beta 1, 32kDa                                       | BA46          | 1                   |
| <i>GJB5</i>             | gap junction protein, beta 5, 31.1kDa                                     | BA46          | 1                   |
| <i>GNA14</i>            | guanine nucleotide binding protein (G protein), alpha 14                  | BA46          | 1                   |
| <i>GRP</i>              | gastrin-releasing peptide                                                 | BA46          | 1                   |
| <i>HAPLN4</i>           | hyaluronan and proteoglycan link protein 4                                | BA46          | 1                   |
| <i>HSPB8</i>            | heat shock 22kDa protein 8                                                | BA46          | 1                   |
| <i>HTR3A</i>            | 5-hydroxytryptamine (serotonin) receptor 3A, ionotropic                   | BA46          | 1                   |
| <i>IGF2BP2</i>          | insulin-like growth factor 2 mRNA binding protein 2                       | BA46          | 1                   |
| <i>ISM2</i>             | isthmin 2                                                                 | BA46          | 1                   |
| <i>KCNS1</i>            | potassium voltage-gated channel, delayed-rectifier, subfamily S, member 1 | BA46          | 1                   |
| <i>KERA</i>             | keratocan                                                                 | BA46          | 1                   |
| <i>KLK6</i>             | kallikrein-related peptidase 6                                            | BA46          | 1                   |
| <i>KRT19</i>            | keratin 19                                                                | BA46          | 1                   |
| <i>KRT7</i>             | keratin 7                                                                 | BA46          | 1                   |
| <i>KRT80</i>            | keratin 80                                                                | BA46          | 1                   |
| <i>LGR6</i>             | leucine-rich repeat containing G protein-coupled receptor 6               | BA46          | 1                   |
| <i>LOC103214977</i>     | uncharacterized LOC103214977                                              | BA46          | 1                   |
| <i>LOC103216325</i>     | uncharacterized LOC103216325                                              | BA46          | 1                   |
| <i>LOC103216876</i>     | uncharacterized LOC103216876                                              | BA46          | 1                   |
| <i>LOC103217402</i>     | uncharacterized LOC103217402                                              | BA46          | 1                   |
| <i>LOC103218887</i>     | olfactory receptor 1J2                                                    | BA46          | 1                   |
| <i>LOC103218889</i>     | olfactory receptor 1J4-like                                               | BA46          | 1                   |
| <i>LOC103219658</i>     | uncharacterized LOC103219658                                              | BA46          | 1                   |
| <i>LOC103219850</i>     | proteasome subunit beta type-1 pseudogene                                 | BA46          | 1                   |
| <i>LOC103220411</i>     | 40S ribosomal protein S12 pseudogene                                      | BA46          | 1                   |
| <i>LOC103221116</i>     | putative uncharacterized protein C21orf125                                | BA46          | 1                   |
| <i>LOC103221863</i>     | mamu class I histocompatibility antigen, alpha chain F-like               | BA46          | 1                   |
| <i>LOC103221894</i>     | olfactory receptor 10C1-like                                              | BA46          | 1                   |
| <i>LOC103221933</i>     | histone H2B type 1-O                                                      | BA46          | 1                   |
| <i>LOC103221935</i>     | histone H2A type 1                                                        | BA46          | 1                   |
| <i>LOC103221943</i>     | histone H2A type 1                                                        | BA46          | 1                   |
| <i>LOC103221944</i>     | histone H1.5                                                              | BA46          | 1                   |
| <i>LOC103221945</i>     | histone H3.1-like                                                         | BA46          | 1                   |
| <i>LOC103221996</i>     | histone H2B type 1-F/J/L-like                                             | BA46          | 1                   |
| <i>LOC103222083</i>     | uncharacterized LOC103222083                                              | BA46          | 1                   |
| <i>LOC103222154</i>     | uncharacterized LOC103222154                                              | BA46          | 1                   |
| <i>LOC103222155</i>     | uncharacterized LOC103222155                                              | BA46          | 1                   |
| <i>LOC103222369</i>     | uncharacterized LOC103222369                                              | BA46          | 1                   |
| <i>LOC103222593</i>     | uncharacterized LOC103222593                                              | BA46          | 1                   |
| <i>LOC103222965</i>     | P2X purinoceptor 6-like                                                   | BA46          | 1                   |
| <i>LOC103223518</i>     | uncharacterized LOC103223518                                              | BA46          | 1                   |
| <i>LOC103223762</i>     | olfactory receptor 10J1-like                                              | BA46          | 1                   |
| <i>LOC103224231</i>     | uncharacterized LOC103224231                                              | BA46          | 1                   |
| <i>LOC103224977</i>     | uncharacterized LOC103224977                                              | BA46          | 1                   |
| <i>LOC103225645</i>     | uncharacterized LOC103225645                                              | BA46          | 1                   |
| <i>LOC103226929</i>     | aldo-keto reductase family 1 member B10-like                              | BA46          | 1                   |
| <i>LOC103226931</i>     | aldo-keto reductase family 1 member B10                                   | BA46          | 1                   |
| <i>LOC103226932</i>     | aldo-keto reductase family 1 member B10-like                              | BA46          | 1                   |
| <i>LOC103228345</i>     | putative uncharacterized protein                                          | BA46          | 1                   |
| <i>LOC103230633</i>     | uncharacterized LOC103230633                                              | BA46          | 1                   |
| <i>LOC103230880</i>     | uncharacterized LOC103230880                                              | BA46          | 1                   |
| <i>LOC103231593</i>     | zinc finger protein 729-like                                              | BA46          | 1                   |
| <i>LOC103231996</i>     | centromere protein V-like                                                 | BA46          | 1                   |
| <i>LOC103233113</i>     | uncharacterized LOC103233113                                              | BA46          | 1                   |



**Supplementary Table 8. Genes in the top or bottom 10% of loadings on PC 1 for Caudate and BA46, where that dimension in PCA showed a clear pattern with age as illustrated in Figure 1.**

| <b>VervetGeneSymbol</b> | <b>Description</b>                                                                    | <b>Tissue</b> | <b>PC Dimension</b> |
|-------------------------|---------------------------------------------------------------------------------------|---------------|---------------------|
| <i>LOC103233444</i>     | bile salt-activated lipase-like                                                       | BA46          | 1                   |
| <i>LOC103233832</i>     | fibrillin-3-like                                                                      | BA46          | 1                   |
| <i>LOC103234284</i>     | zinc finger protein 98-like                                                           | BA46          | 1                   |
| <i>LOC103234347</i>     | fibrillin-3-like                                                                      | BA46          | 1                   |
| <i>LOC103234986</i>     | galactoside 2-alpha-L-fucosyltransferase 2                                            | BA46          | 1                   |
| <i>LOC103234988</i>     | galactoside 2-alpha-L-fucosyltransferase 2-like                                       | BA46          | 1                   |
| <i>LOC103236784</i>     | uncharacterized LOC103236784                                                          | BA46          | 1                   |
| <i>LOC103237464</i>     | uncharacterized LOC103237464                                                          | BA46          | 1                   |
| <i>LOC103237465</i>     | uncharacterized LOC103237465                                                          | BA46          | 1                   |
| <i>LOC103237714</i>     | lymphocyte-specific protein 1                                                         | BA46          | 1                   |
| <i>LOC103239382</i>     | uncharacterized LOC103239382                                                          | BA46          | 1                   |
| <i>LOC103240941</i>     | uncharacterized LOC103240941                                                          | BA46          | 1                   |
| <i>LOC103241172</i>     | adenosylhomocysteinase pseudogene                                                     | BA46          | 1                   |
| <i>LOC103241685</i>     | uncharacterized LOC103241685                                                          | BA46          | 1                   |
| <i>LOC103241849</i>     | spidroin-1                                                                            | BA46          | 1                   |
| <i>LOC103242716</i>     | uncharacterized LOC103242716                                                          | BA46          | 1                   |
| <i>LOC103242774</i>     | TBC1 domain family member 3G-like                                                     | BA46          | 1                   |
| <i>LOC103243079</i>     | ras-related protein Rab-37                                                            | BA46          | 1                   |
| <i>LOC103244091</i>     | uncharacterized LOC103244091                                                          | BA46          | 1                   |
| <i>LOC103244197</i>     | uncharacterized LOC103244197                                                          | BA46          | 1                   |
| <i>LOC103244931</i>     | uncharacterized LOC103244931                                                          | BA46          | 1                   |
| <i>LOC103245855</i>     | uncharacterized LOC103245855                                                          | BA46          | 1                   |
| <i>LOC103247904</i>     | hemoglobin subunit gamma-1                                                            | BA46          | 1                   |
| <i>LOC103248295</i>     | uncharacterized LOC103248295                                                          | BA46          | 1                   |
| <i>LYVE1</i>            | lymphatic vessel endothelial hyaluronan receptor 1                                    | BA46          | 1                   |
| <i>MAG</i>              | myelin associated glycoprotein                                                        | BA46          | 1                   |
| <i>MBP</i>              | myelin basic protein                                                                  | BA46          | 1                   |
| <i>MDFI</i>             | MyoD family inhibitor                                                                 | BA46          | 1                   |
| <i>MEOX1</i>            | mesenchyme homeobox 1                                                                 | BA46          | 1                   |
| <i>MKI67</i>            | marker of proliferation Ki-67                                                         | BA46          | 1                   |
| <i>MOG</i>              | myelin oligodendrocyte glycoprotein                                                   | BA46          | 1                   |
| <i>MUC4</i>             | mucin 4, cell surface associated                                                      | BA46          | 1                   |
| <i>MYH13</i>            | myosin, heavy chain 13, skeletal muscle                                               | BA46          | 1                   |
| <i>MYL10</i>            | myosin, light chain 10, regulatory                                                    | BA46          | 1                   |
| <i>NKX6-2</i>           | NK6 homeobox 2                                                                        | BA46          | 1                   |
| <i>NMRK2</i>            | nicotinamide riboside kinase 2                                                        | BA46          | 1                   |
| <i>NPBWR1</i>           | neuropeptides B/W receptor 1                                                          | BA46          | 1                   |
| <i>NTSR1</i>            | neurotensin receptor 1 (high affinity)                                                | BA46          | 1                   |
| <i>OAS1</i>             | 2'-5'-oligoadenylate synthetase 1, 40/46kDa                                           | BA46          | 1                   |
| <i>OAS2</i>             | 2'-5'-oligoadenylate synthetase 2, 69/71kDa                                           | BA46          | 1                   |
| <i>OPALIN</i>           | oligodendrocytic myelin paranodal and inner loop protein                              | BA46          | 1                   |
| <i>OSR1</i>             | odd-skipped related transcription factor 1                                            | BA46          | 1                   |
| <i>OSTN</i>             | osteocrin                                                                             | BA46          | 1                   |
| <i>PLAC8</i>            | placenta-specific 8                                                                   | BA46          | 1                   |
| <i>PRSS35</i>           | protease, serine, 35                                                                  | BA46          | 1                   |
| <i>PRSS45</i>           | protease, serine, 45                                                                  | BA46          | 1                   |
| <i>PTF1A</i>            | pancreas specific transcription factor, 1a                                            | BA46          | 1                   |
| <i>PTGS1</i>            | prostaglandin-endoperoxide synthase 1 (prostaglandin G/H synthase and cyclooxygenase) | BA46          | 1                   |
| <i>PTX3</i>             | pentraxin 3, long                                                                     | BA46          | 1                   |
| <i>RASD1</i>            | RAS, dexamethasone-induced 1                                                          | BA46          | 1                   |
| <i>RASEF</i>            | RAS and EF-hand domain containing                                                     | BA46          | 1                   |
| <i>RASSF10</i>          | Ras association (RalGDS/AF-6) domain family (N-terminal) member 10                    | BA46          | 1                   |
| <i>RORC</i>             | RAR-related orphan receptor C                                                         | BA46          | 1                   |
| <i>RPRM</i>             | reprimin, TP53 dependent G2 arrest mediator candidate                                 | BA46          | 1                   |
| <i>S1PR5</i>            | sphingosine-1-phosphate receptor 5                                                    | BA46          | 1                   |
| <i>SEC14L5</i>          | SEC14-like 5 ( <i>S. cerevisiae</i> )                                                 | BA46          | 1                   |

**Supplementary Table 8. Genes in the top or bottom 10% of loadings on PC 1 for Caudate and BA46, where that dimension in PCA showed a clear pattern with age as illustrated in Figure 1.**

| <b>VervetGeneSymbol</b> | <b>Description</b>                                                            | <b>Tissue</b> | <b>PC Dimension</b> |
|-------------------------|-------------------------------------------------------------------------------|---------------|---------------------|
| <i>SECTM1</i>           | secreted and transmembrane 1                                                  | BA46          | 1                   |
| <i>SERINC2</i>          | serine incorporator 2                                                         | BA46          | 1                   |
| <i>SH2D5</i>            | SH2 domain containing 5                                                       | BA46          | 1                   |
| <i>SHCBP1</i>           | SHC SH2-domain binding protein 1                                              | BA46          | 1                   |
| <i>SLA</i>              | Src-like-adaptor                                                              | BA46          | 1                   |
| <i>SLC22A2</i>          | solute carrier family 22 (organic cation transporter), member 2               | BA46          | 1                   |
| <i>SLC22A8</i>          | solute carrier family 22 (organic anion transporter), member 8                | BA46          | 1                   |
| <i>SLC25A45</i>         | solute carrier family 25, member 45                                           | BA46          | 1                   |
| <i>SLC6A20</i>          | solute carrier family 6 (proline IMINO transporter), member 20                | BA46          | 1                   |
| <i>SLITRK6</i>          | SLIT and NTRK-like family, member 6                                           | BA46          | 1                   |
| <i>SOHLH1</i>           | spermatogenesis and oogenesis specific basic helix-loop-helix 1               | BA46          | 1                   |
| <i>SOX11</i>            | SRY (sex determining region Y)-box 11                                         | BA46          | 1                   |
| <i>SPINK2</i>           | serine peptidase inhibitor, Kazal type 2 (acrosin-trypsin inhibitor)          | BA46          | 1                   |
| <i>SPINT1</i>           | serine peptidase inhibitor, Kunitz type 1                                     | BA46          | 1                   |
| <i>STRA6</i>            | stimulated by retinoic acid 6                                                 | BA46          | 1                   |
| <i>SULT1E1</i>          | sulfotransferase family 1E, estrogen-preferring, member 1                     | BA46          | 1                   |
| <i>SYTL1</i>            | synaptotagmin-like 1                                                          | BA46          | 1                   |
| <i>TACR3</i>            | tachykinin receptor 3                                                         | BA46          | 1                   |
| <i>TEX37</i>            | testis expressed 37                                                           | BA46          | 1                   |
| <i>TG</i>               | thyroglobulin                                                                 | BA46          | 1                   |
| <i>THBS1</i>            | thrombospondin 1                                                              | BA46          | 1                   |
| <i>THBS2</i>            | thrombospondin 2                                                              | BA46          | 1                   |
| <i>THBS4</i>            | thrombospondin 4                                                              | BA46          | 1                   |
| <i>THSD4</i>            | thrombospondin, type I, domain containing 4                                   | BA46          | 1                   |
| <i>TICRR</i>            | TOPBP1-interacting checkpoint and replication regulator                       | BA46          | 1                   |
| <i>TIMD4</i>            | T-cell immunoglobulin and mucin domain containing 4                           | BA46          | 1                   |
| <i>TMEM125</i>          | transmembrane protein 125                                                     | BA46          | 1                   |
| <i>TNNT2</i>            | troponin T type 2 (cardiac)                                                   | BA46          | 1                   |
| <i>UHRF1</i>            | ubiquitin-like with PHD and ring finger domains 1                             | BA46          | 1                   |
| <i>VEPH1</i>            | ventricular zone expressed PH domain-containing 1                             | BA46          | 1                   |
| <i>WFIKN2</i>           | WAP, follistatin/kazal, immunoglobulin, kunitz and netrin domain containing 2 | BA46          | 1                   |
| <i>ZNF469</i>           | zinc finger protein 469                                                       | BA46          | 1                   |
| <i>SEPT4</i>            | septin 4                                                                      | Caudate       | 1                   |
| <i>ABCA8</i>            | ATP-binding cassette, sub-family A (ABC1), member 8                           | Caudate       | 1                   |
| <i>AGPAT9</i>           | 1-acylglycerol-3-phosphate O-acyltransferase 9                                | Caudate       | 1                   |
| <i>AGT</i>              | angiotensinogen (serpin peptidase inhibitor, clade A, member 8)               | Caudate       | 1                   |
| <i>AIPL1</i>            | aryl hydrocarbon receptor interacting protein-like 1                          | Caudate       | 1                   |
| <i>ALAS2</i>            | aminolevulinate, delta-, synthase 2                                           | Caudate       | 1                   |
| <i>ALOX15</i>           | arachidonate 15-lipoxygenase                                                  | Caudate       | 1                   |
| <i>ANLN</i>             | anillin, actin binding protein                                                | Caudate       | 1                   |
| <i>APOB</i>             | apolipoprotein B                                                              | Caudate       | 1                   |
| <i>APOC2</i>            | apolipoprotein C-II                                                           | Caudate       | 1                   |
| <i>ASAH2</i>            | N-acylsphingosine amidohydrolase (non-lysosomal ceramidase) 2                 | Caudate       | 1                   |
| <i>ASPM</i>             | asp (abnormal spindle) homolog, microcephaly associated ( <i>Drosophila</i> ) | Caudate       | 1                   |
| <i>BUB1</i>             | BUB1 mitotic checkpoint serine/threonine kinase                               | Caudate       | 1                   |
| <i>C17H6orf10</i>       | chromosome 17 open reading frame, human C6orf10                               | Caudate       | 1                   |
| <i>C20H1orf177</i>      | chromosome 20 open reading frame, human C1orf177                              | Caudate       | 1                   |
| <i>CACNA1S</i>          | calcium channel, voltage-dependent, L type, alpha 1S subunit                  | Caudate       | 1                   |
| <i>CD177</i>            | CD177 molecule                                                                | Caudate       | 1                   |
| <i>CDK1</i>             | cyclin-dependent kinase 1                                                     | Caudate       | 1                   |
| <i>CLCA2</i>            | chloride channel accessory 2                                                  | Caudate       | 1                   |
| <i>CLRN2</i>            | clarin 2                                                                      | Caudate       | 1                   |
| <i>CNDP1</i>            | carnosine dipeptidase 1 (metallopeptidase M20 family)                         | Caudate       | 1                   |
| <i>CNTN6</i>            | contactin 6                                                                   | Caudate       | 1                   |
| <i>COL1A1</i>           | collagen, type I, alpha 1                                                     | Caudate       | 1                   |
| <i>COL3A1</i>           | collagen, type III, alpha 1                                                   | Caudate       | 1                   |

**Supplementary Table 8. Genes in the top or bottom 10% of loadings on PC 1 for Caudate and BA46, where that dimension in PCA showed a clear pattern with age as illustrated in Figure 1.**

| <b>VervetGeneSymbol</b> | <b>Description</b>                                                         | <b>Tissue</b> | <b>PC Dimension</b> |
|-------------------------|----------------------------------------------------------------------------|---------------|---------------------|
| <i>COL6A5</i>           | collagen, type VI, alpha 5                                                 | Caudate       | 1                   |
| <i>CPB1</i>             | carboxypeptidase B1 (tissue)                                               | Caudate       | 1                   |
| <i>CRYAB</i>            | crystallin, alpha B                                                        | Caudate       | 1                   |
| <i>CRYBB1</i>           | crystallin, beta B1                                                        | Caudate       | 1                   |
| <i>DLGAP5</i>           | discs, large (Drosophila) homolog-associated protein 5                     | Caudate       | 1                   |
| <i>DMKN</i>             | dermokine                                                                  | Caudate       | 1                   |
| <i>DMP1</i>             | dentin matrix acidic phosphoprotein 1                                      | Caudate       | 1                   |
| <i>DOCK5</i>            | dedicator of cytokinesis 5                                                 | Caudate       | 1                   |
| <i>DSP</i>              | desmoplakin                                                                | Caudate       | 1                   |
| <i>E2F2</i>             | E2F transcription factor 2                                                 | Caudate       | 1                   |
| <i>ERMN</i>             | ermin, ERM-like protein                                                    | Caudate       | 1                   |
| <i>ERVMER34-1</i>       | endogenous retrovirus group MER34, member 1                                | Caudate       | 1                   |
| <i>FAM159A</i>          | family with sequence similarity 159, member A                              | Caudate       | 1                   |
| <i>FAM163B</i>          | family with sequence similarity 163, member B                              | Caudate       | 1                   |
| <i>FAM19A1</i>          | family with sequence similarity 19 (chemokine (C-C motif)-like), member A1 | Caudate       | 1                   |
| <i>FAM19A2</i>          | family with sequence similarity 19 (chemokine (C-C motif)-like), member A2 | Caudate       | 1                   |
| <i>FAT2</i>             | FAT atypical cadherin 2                                                    | Caudate       | 1                   |
| <i>FOSB</i>             | FBJ murine osteosarcoma viral oncogene homolog B                           | Caudate       | 1                   |
| <i>FOXI3</i>            | forkhead box I3                                                            | Caudate       | 1                   |
| <i>FST</i>              | follistatin                                                                | Caudate       | 1                   |
| <i>GADL1</i>            | glutamate decarboxylase-like 1                                             | Caudate       | 1                   |
| <i>GALNT5</i>           | polypeptide N-acetylgalactosaminyltransferase 5                            | Caudate       | 1                   |
| <i>GCNT1</i>            | glucosaminyl (N-acetyl) transferase 1, core 2                              | Caudate       | 1                   |
| <i>GDF2</i>             | growth differentiation factor 2                                            | Caudate       | 1                   |
| <i>GJB1</i>             | gap junction protein, beta 1, 32kDa                                        | Caudate       | 1                   |
| <i>GJD2</i>             | gap junction protein, delta 2, 36kDa                                       | Caudate       | 1                   |
| <i>GLRA2</i>            | glycine receptor, alpha 2                                                  | Caudate       | 1                   |
| <i>GPNMB</i>            | glycoprotein (transmembrane) nmb                                           | Caudate       | 1                   |
| <i>GPX2</i>             | glutathione peroxidase 2 (gastrointestinal)                                | Caudate       | 1                   |
| <i>HAPLN2</i>           | hyaluronan and proteoglycan link protein 2                                 | Caudate       | 1                   |
| <i>HAPLN4</i>           | hyaluronan and proteoglycan link protein 4                                 | Caudate       | 1                   |
| <i>HOXD1</i>            | homeobox D1                                                                | Caudate       | 1                   |
| <i>HOXD3</i>            | homeobox D3                                                                | Caudate       | 1                   |
| <i>HSF4</i>             | heat shock transcription factor 4                                          | Caudate       | 1                   |
| <i>HSPB8</i>            | heat shock 22kDa protein 8                                                 | Caudate       | 1                   |
| <i>IGFBP3</i>           | insulin-like growth factor binding protein 3                               | Caudate       | 1                   |
| <i>IGFBP6</i>           | insulin-like growth factor binding protein 6                               | Caudate       | 1                   |
| <i>IRX3</i>             | iroquois homeobox 3                                                        | Caudate       | 1                   |
| <i>ISX</i>              | intestine-specific homeobox                                                | Caudate       | 1                   |
| <i>KANK4</i>            | KN motif and ankyrin repeat domains 4                                      | Caudate       | 1                   |
| <i>KDM5D</i>            | lysine (K)-specific demethylase 5D                                         | Caudate       | 1                   |
| <i>KLHL4</i>            | kelch-like family member 4                                                 | Caudate       | 1                   |
| <i>KLK6</i>             | kallikrein-related peptidase 6                                             | Caudate       | 1                   |
| <i>LOC103214240</i>     | uncharacterized LOC103214240                                               | Caudate       | 1                   |
| <i>LOC103214520</i>     | uncharacterized LOC103214520                                               | Caudate       | 1                   |
| <i>LOC103214814</i>     | uncharacterized LOC103214814                                               | Caudate       | 1                   |
| <i>LOC103215490</i>     | uncharacterized LOC103215490                                               | Caudate       | 1                   |
| <i>LOC103215493</i>     | uncharacterized LOC103215493                                               | Caudate       | 1                   |
| <i>LOC103215864</i>     | neuropeptide Y receptor type 4                                             | Caudate       | 1                   |
| <i>LOC103216365</i>     | uncharacterized LOC103216365                                               | Caudate       | 1                   |
| <i>LOC103216366</i>     | uncharacterized LOC103216366                                               | Caudate       | 1                   |
| <i>LOC103216558</i>     | uncharacterized LOC103216558                                               | Caudate       | 1                   |
| <i>LOC103216690</i>     | uncharacterized LOC103216690                                               | Caudate       | 1                   |
| <i>LOC103217039</i>     | uncharacterized LOC103217039                                               | Caudate       | 1                   |
| <i>LOC103217040</i>     | uncharacterized LOC103217040                                               | Caudate       | 1                   |
| <i>LOC103217195</i>     | uncharacterized LOC103217195                                               | Caudate       | 1                   |

**Supplementary Table 8. Genes in the top or bottom 10% of loadings on PC 1 for Caudate and BA46, where that dimension in PCA showed a clear pattern with age as illustrated in Figure 1.**

| <b>VervetGeneSymbol</b> | <b>Description</b>                                          | <b>Tissue</b> | <b>PC Dimension</b> |
|-------------------------|-------------------------------------------------------------|---------------|---------------------|
| <i>LOC103217614</i>     | uncharacterized LOC103217614                                | Caudate       | 1                   |
| <i>LOC103217927</i>     | uncharacterized LOC103217927                                | Caudate       | 1                   |
| <i>LOC103218545</i>     | alpha-2-macroglobulin-like                                  | Caudate       | 1                   |
| <i>LOC103218697</i>     | uncharacterized LOC103218697                                | Caudate       | 1                   |
| <i>LOC103218698</i>     | uncharacterized LOC103218698                                | Caudate       | 1                   |
| <i>LOC103218845</i>     | hsc70-interacting protein pseudogene                        | Caudate       | 1                   |
| <i>LOC103219103</i>     | uncharacterized LOC103219103                                | Caudate       | 1                   |
| <i>LOC103219657</i>     | uncharacterized LOC103219657                                | Caudate       | 1                   |
| <i>LOC103219832</i>     | uncharacterized LOC103219832                                | Caudate       | 1                   |
| <i>LOC103219872</i>     | keratin-associated protein 10-11-like                       | Caudate       | 1                   |
| <i>LOC103221007</i>     | uncharacterized LOC103221007                                | Caudate       | 1                   |
| <i>LOC103221705</i>     | heterogeneous nuclear ribonucleoprotein A1-like             | Caudate       | 1                   |
| <i>LOC103221863</i>     | mamu class I histocompatibility antigen, alpha chain F-like | Caudate       | 1                   |
| <i>LOC103221933</i>     | histone H2B type 1-O                                        | Caudate       | 1                   |
| <i>LOC103221935</i>     | histone H2A type 1                                          | Caudate       | 1                   |
| <i>LOC103221936</i>     | histone H2A type 1-J                                        | Caudate       | 1                   |
| <i>LOC103221937</i>     | histone H2B type 1-M                                        | Caudate       | 1                   |
| <i>LOC103221943</i>     | histone H2A type 1                                          | Caudate       | 1                   |
| <i>LOC103221944</i>     | histone H1.5                                                | Caudate       | 1                   |
| <i>LOC103221945</i>     | histone H3.1-like                                           | Caudate       | 1                   |
| <i>LOC103221968</i>     | histone H2A type 1-H                                        | Caudate       | 1                   |
| <i>LOC103221996</i>     | histone H2B type 1-F/J/L-like                               | Caudate       | 1                   |
| <i>LOC103222004</i>     | histone H3.1                                                | Caudate       | 1                   |
| <i>LOC103222079</i>     | uncharacterized LOC103222079                                | Caudate       | 1                   |
| <i>LOC103222083</i>     | uncharacterized LOC103222083                                | Caudate       | 1                   |
| <i>LOC103222087</i>     | uncharacterized LOC103222087                                | Caudate       | 1                   |
| <i>LOC103222429</i>     | uncharacterized LOC103222429                                | Caudate       | 1                   |
| <i>LOC103222617</i>     | uncharacterized LOC103222617                                | Caudate       | 1                   |
| <i>LOC103224231</i>     | uncharacterized LOC103224231                                | Caudate       | 1                   |
| <i>LOC103224548</i>     | uncharacterized LOC103224548                                | Caudate       | 1                   |
| <i>LOC103224550</i>     | uncharacterized LOC103224550                                | Caudate       | 1                   |
| <i>LOC103224553</i>     | hsc70-interacting protein-like                              | Caudate       | 1                   |
| <i>LOC103225907</i>     | omega-amidase NIT2 pseudogene                               | Caudate       | 1                   |
| <i>LOC103226631</i>     | elongation factor 1-delta-like                              | Caudate       | 1                   |
| <i>LOC103226870</i>     | brain-specific serine protease 4                            | Caudate       | 1                   |
| <i>LOC103228374</i>     | uncharacterized LOC103228374                                | Caudate       | 1                   |
| <i>LOC103231548</i>     | neuronal regeneration-related protein pseudogene            | Caudate       | 1                   |
| <i>LOC103232191</i>     | uncharacterized LOC103232191                                | Caudate       | 1                   |
| <i>LOC103233113</i>     | uncharacterized LOC103233113                                | Caudate       | 1                   |
| <i>LOC103233444</i>     | bile salt-activated lipase-like                             | Caudate       | 1                   |
| <i>LOC103233527</i>     | uncharacterized LOC103233527                                | Caudate       | 1                   |
| <i>LOC103234347</i>     | fibrillin-3-like                                            | Caudate       | 1                   |
| <i>LOC103234988</i>     | galactoside 2-alpha-L-fucosyltransferase 2-like             | Caudate       | 1                   |
| <i>LOC103236664</i>     | uncharacterized LOC103236664                                | Caudate       | 1                   |
| <i>LOC103236776</i>     | uncharacterized LOC103236776                                | Caudate       | 1                   |
| <i>LOC103236784</i>     | uncharacterized LOC103236784                                | Caudate       | 1                   |
| <i>LOC103237807</i>     | aldo-keto reductase family 1 member C1 homolog              | Caudate       | 1                   |
| <i>LOC103238617</i>     | 40S ribosomal protein S3 pseudogene                         | Caudate       | 1                   |
| <i>LOC103239962</i>     | uncharacterized LOC103239962                                | Caudate       | 1                   |
| <i>LOC103240326</i>     | uncharacterized LOC103240326                                | Caudate       | 1                   |
| <i>LOC103240468</i>     | uncharacterized LOC103240468                                | Caudate       | 1                   |
| <i>LOC103240469</i>     | uncharacterized LOC103240469                                | Caudate       | 1                   |
| <i>LOC103240470</i>     | uncharacterized LOC103240470                                | Caudate       | 1                   |
| <i>LOC103240471</i>     | uncharacterized LOC103240471                                | Caudate       | 1                   |
| <i>LOC103240472</i>     | uncharacterized LOC103240472                                | Caudate       | 1                   |
| <i>LOC103240473</i>     | uncharacterized LOC103240473                                | Caudate       | 1                   |

**Supplementary Table 8. Genes in the top or bottom 10% of loadings on PC 1 for Caudate and BA46, where that dimension in PCA showed a clear pattern with age as illustrated in Figure 1.**

| <b>VervetGeneSymbol</b> | <b>Description</b>                                                 | <b>Tissue</b> | <b>PC Dimension</b> |
|-------------------------|--------------------------------------------------------------------|---------------|---------------------|
| <i>LOC103240474</i>     | uncharacterized LOC103240474                                       | Caudate       | 1                   |
| <i>LOC103240475</i>     | uncharacterized LOC103240475                                       | Caudate       | 1                   |
| <i>LOC103240939</i>     | putative uncharacterized protein FLJ45177                          | Caudate       | 1                   |
| <i>LOC103240941</i>     | uncharacterized LOC103240941                                       | Caudate       | 1                   |
| <i>LOC103241538</i>     | uncharacterized LOC103241538                                       | Caudate       | 1                   |
| <i>LOC103241700</i>     | collagen alpha-4(VI) chain-like                                    | Caudate       | 1                   |
| <i>LOC103242716</i>     | uncharacterized LOC103242716                                       | Caudate       | 1                   |
| <i>LOC103243101</i>     | uncharacterized LOC103243101                                       | Caudate       | 1                   |
| <i>LOC103243139</i>     | uncharacterized LOC103243139                                       | Caudate       | 1                   |
| <i>LOC103243458</i>     | keratin, type I cuticular Ha7-like                                 | Caudate       | 1                   |
| <i>LOC103244383</i>     | uncharacterized LOC103244383                                       | Caudate       | 1                   |
| <i>LOC103244770</i>     | uncharacterized LOC103244770                                       | Caudate       | 1                   |
| <i>LOC103244868</i>     | uncharacterized LOC103244868                                       | Caudate       | 1                   |
| <i>LOC103246345</i>     | uncharacterized LOC103246345                                       | Caudate       | 1                   |
| <i>LOC103246967</i>     | 40S ribosomal protein S4, Y isoform 1                              | Caudate       | 1                   |
| <i>LOC103246998</i>     | ankyrin repeat domain-containing protein 37 pseudogene             | Caudate       | 1                   |
| <i>LOC103247901</i>     | hemoglobin subunit beta                                            | Caudate       | 1                   |
| <i>LOC103247904</i>     | hemoglobin subunit gamma-1                                         | Caudate       | 1                   |
| <i>LRRC55</i>           | leucine rich repeat containing 55                                  | Caudate       | 1                   |
| <i>MKI67</i>            | marker of proliferation Ki-67                                      | Caudate       | 1                   |
| <i>MYC</i>              | v-myc avian myelocytomatosis viral oncogene homolog                | Caudate       | 1                   |
| <i>MYO5B</i>            | myosin VB                                                          | Caudate       | 1                   |
| <i>NDC80</i>            | NDC80 kinetochore complex component                                | Caudate       | 1                   |
| <i>NDRG1</i>            | N-myc downstream regulated 1                                       | Caudate       | 1                   |
| <i>NGFR</i>             | nerve growth factor receptor                                       | Caudate       | 1                   |
| <i>NKX3-1</i>           | NK3 homeobox 1                                                     | Caudate       | 1                   |
| <i>NPBWR1</i>           | neuropeptides B/W receptor 1                                       | Caudate       | 1                   |
| <i>NTS</i>              | neurotensin                                                        | Caudate       | 1                   |
| <i>OTOG</i>             | otogelin                                                           | Caudate       | 1                   |
| <i>PMEL</i>             | premelanosome protein                                              | Caudate       | 1                   |
| <i>POPDC3</i>           | popeye domain containing 3                                         | Caudate       | 1                   |
| <i>PPAP2C</i>           | phosphatidic acid phosphatase type 2C                              | Caudate       | 1                   |
| <i>PTF1A</i>            | pancreas specific transcription factor, 1a                         | Caudate       | 1                   |
| <i>RAB7B</i>            | RAB7B, member RAS oncogene family                                  | Caudate       | 1                   |
| <i>RBP3</i>             | retinol binding protein 3, interstitial                            | Caudate       | 1                   |
| <i>RNF152</i>           | ring finger protein 152                                            | Caudate       | 1                   |
| <i>S1PR5</i>            | sphingosine-1-phosphate receptor 5                                 | Caudate       | 1                   |
| <i>SGOL1</i>            | shugoshin-like 1 (S. pombe)                                        | Caudate       | 1                   |
| <i>SHCBP1</i>           | SHC SH2-domain binding protein 1                                   | Caudate       | 1                   |
| <i>SLC16A11</i>         | solute carrier family 16, member 11                                | Caudate       | 1                   |
| <i>SLC17A2</i>          | solute carrier family 17, member 2                                 | Caudate       | 1                   |
| <i>SLC17A3</i>          | solute carrier family 17 (organic anion transporter), member 3     | Caudate       | 1                   |
| <i>SLC5A11</i>          | solute carrier family 5 (sodium/inositol cotransporter), member 11 | Caudate       | 1                   |
| <i>SLC6A7</i>           | solute carrier family 6 (neurotransmitter transporter), member 7   | Caudate       | 1                   |
| <i>SP8</i>              | Sp8 transcription factor                                           | Caudate       | 1                   |
| <i>SPTA1</i>            | spectrin, alpha, erythrocytic 1 (elliptocytosis 2)                 | Caudate       | 1                   |
| <i>ST8SIA2</i>          | ST8 alpha-N-acetyl-neuraminide alpha-2,8-sialyltransferase 2       | Caudate       | 1                   |
| <i>STRA6</i>            | stimulated by retinoic acid 6                                      | Caudate       | 1                   |
| <i>STYK1</i>            | serine/threonine/tyrosine kinase 1                                 | Caudate       | 1                   |
| <i>SULT1E1</i>          | sulfotransferase family 1E, estrogen-preferring, member 1          | Caudate       | 1                   |
| <i>SYT10</i>            | synaptotagmin X                                                    | Caudate       | 1                   |
| <i>SYTL1</i>            | synaptotagmin-like 1                                               | Caudate       | 1                   |
| <i>TESPA1</i>           | thymocyte expressed, positive selection associated 1               | Caudate       | 1                   |
| <i>TFCP2L1</i>          | transcription factor CP2-like 1                                    | Caudate       | 1                   |
| <i>TIMD4</i>            | T-cell immunoglobulin and mucin domain containing 4                | Caudate       | 1                   |
| <i>TMEM235</i>          | transmembrane protein 235                                          | Caudate       | 1                   |

**Supplementary Table 8. Genes in the top or bottom 10% of loadings on PC 1 for Caudate and BA46, where that dimension in PCA showed a clear pattern with age as illustrated in Figure 1.**

| <b>VervetGeneSymbol</b> | <b>Description</b>                                                     | <b>Tissue</b> | <b>PC Dimension</b> |
|-------------------------|------------------------------------------------------------------------|---------------|---------------------|
| <i>TRHR</i>             | thyrotropin-releasing hormone receptor                                 | Caudate       | 1                   |
| <i>TRPC5</i>            | transient receptor potential cation channel, subfamily C, member 5     | Caudate       | 1                   |
| <i>TRPC5OS</i>          | TRPC5 opposite strand                                                  | Caudate       | 1                   |
| <i>TSPAN2</i>           | tetraspanin 2                                                          | Caudate       | 1                   |
| <i>TSPEAR</i>           | thrombospondin-type laminin G domain and EAR repeats                   | Caudate       | 1                   |
| <i>USP9Y</i>            | ubiquitin specific peptidase 9, Y-linked                               | Caudate       | 1                   |
| <i>UTY</i>              | ubiquitously transcribed tetratricopeptide repeat containing, Y-linked | Caudate       | 1                   |
| <i>WNT6</i>             | wingless-type MMTV integration site family, member 6                   | Caudate       | 1                   |

**Supplementary Table 9. Genes with a significant age effect from either ANOVA or linear regression. Beta is the regression coefficient, Pval is the p-value for the regression coefficient of expression on age (in days). Effect category is increasing if beta is positive and significant, decreasing if beta is negative and significant, and other if the ANOVA were significant rather than the linear regression. Local eQTL is 1 if the gene had a significant local eQTL**

| Gene            | Tissue  | Anova.pval | Beta      | Pval     | EffectCategory | Local eQTL |
|-----------------|---------|------------|-----------|----------|----------------|------------|
| <i>AASS</i>     | Adrenal | 5.42E-14   | 0.000812  | 2.06E-10 | increasing     | 0          |
| <i>ABCA3</i>    | Adrenal | 5.51E-12   | 0.000792  | 4.79E-10 | increasing     | 0          |
| <i>ABCA5</i>    | Adrenal | 4.39E-09   | 0.000653  | 1.42E-06 | increasing     | 0          |
| <i>ABCB4</i>    | Adrenal | 3.09E-10   | -0.00077  | 1.99E-09 | decreasing     | 0          |
| <i>ABCF1</i>    | Adrenal | 1.10E-08   | -0.00077  | 6.20E-09 | decreasing     | 0          |
| <i>ABHD17C</i>  | Adrenal | 1.90E-08   | -0.00058  | 3.29E-05 | decreasing     | 0          |
| <i>ABT1</i>     | Adrenal | 9.14E-08   | -0.00058  | 3.15E-05 | decreasing     | 0          |
| <i>ACAA2</i>    | Adrenal | 3.03E-08   | -0.00077  | 1.07E-08 | decreasing     | 0          |
| <i>ACAT2</i>    | Adrenal | 2.73E-08   | 0.000454  | 0.001966 | other          | 0          |
| <i>ACP2</i>     | Adrenal | 3.78E-11   | -0.00071  | 5.12E-08 | decreasing     | 0          |
| <i>ACSF3</i>    | Adrenal | 1.67E-09   | -0.00074  | 1.50E-08 | decreasing     | 0          |
| <i>ADAM22</i>   | Adrenal | 3.84E-09   | 0.000687  | 3.70E-07 | increasing     | 0          |
| <i>ADAMTSL5</i> | Adrenal | 3.52E-08   | -0.00068  | 2.02E-07 | decreasing     | 0          |
| <i>ADARB2</i>   | Adrenal | 1.67E-08   | 0.000716  | 2.51E-08 | increasing     | 0          |
| <i>ADCY9</i>    | Adrenal | 3.25E-09   | 0.000637  | 1.74E-06 | increasing     | 0          |
| <i>ADORA3</i>   | Adrenal | 9.48E-07   | -0.00073  | 9.53E-08 | decreasing     | 0          |
| <i>AFG3L2</i>   | Adrenal | 4.78E-11   | -0.00079  | 7.57E-10 | decreasing     | 0          |
| <i>AGXT2</i>    | Adrenal | 6.66E-09   | 0.000674  | 2.89E-07 | increasing     | 0          |
| <i>AHCY</i>     | Adrenal | 6.37E-09   | -0.00071  | 1.07E-07 | decreasing     | 0          |
| <i>AHNAK</i>    | Adrenal | 1.23E-07   | 0.00066   | 1.02E-06 | increasing     | 0          |
| <i>AHNAK2</i>   | Adrenal | 2.30E-07   | 0.000674  | 6.84E-07 | increasing     | 0          |
| <i>AIMP1</i>    | Adrenal | 1.68E-08   | -0.0005   | 0.000483 | other          | 0          |
| <i>ALDH6A1</i>  | Adrenal | 2.58E-07   | 0.000379  | 0.010287 | other          | 0          |
| <i>ALG3</i>     | Adrenal | 5.87E-09   | -0.00069  | 2.91E-07 | decreasing     | 0          |
| <i>ALOX12</i>   | Adrenal | 1.92E-07   | 0.000608  | 9.73E-06 | increasing     | 0          |
| <i>ALPP</i>     | Adrenal | 3.41E-11   | 0.000615  | 4.60E-06 | increasing     | 0          |
| <i>AMIGO3</i>   | Adrenal | 9.16E-08   | 0.000326  | 0.02716  | other          | 0          |
| <i>ANGPTL1</i>  | Adrenal | 2.26E-09   | -0.00067  | 5.19E-07 | decreasing     | 0          |
| <i>ANGPTL4</i>  | Adrenal | 7.09E-08   | -0.00066  | 1.99E-06 | decreasing     | 0          |
| <i>ANKH</i>     | Adrenal | 5.20E-08   | 0.000527  | 0.000198 | other          | 0          |
| <i>ANKRD6</i>   | Adrenal | 1.00E-11   | 0.000795  | 7.94E-10 | increasing     | 0          |
| <i>ANLN</i>     | Adrenal | 3.66E-10   | -0.0008   | 2.67E-10 | decreasing     | 0          |
| <i>ANO8</i>     | Adrenal | 2.19E-11   | 0.000323  | 0.024605 | other          | 0          |
| <i>AP1S3</i>    | Adrenal | 8.35E-08   | 0.000606  | 1.73E-05 | increasing     | 0          |
| <i>AP2A1</i>    | Adrenal | 6.88E-08   | -0.0007   | 2.78E-07 | decreasing     | 0          |
| <i>AP2S1</i>    | Adrenal | 4.17E-10   | -0.00059  | 3.53E-05 | decreasing     | 0          |
| <i>AP3B2</i>    | Adrenal | 1.28E-10   | 0.000699  | 1.15E-07 | increasing     | 0          |
| <i>APBB1</i>    | Adrenal | 5.20E-09   | 0.000594  | 1.71E-05 | increasing     | 0          |
| <i>APBB3</i>    | Adrenal | 2.71E-08   | 0.000318  | 0.02892  | other          | 0          |
| <i>APCDD1</i>   | Adrenal | 1.20E-09   | -8.64E-05 | 0.563137 | other          | 0          |

**Supplementary Table 9. Genes with a significant age effect from either ANOVA or linear regression. Beta is the regression coefficient, Pval is the p-value for the regression coefficient of expression on age (in days). Effect category is increasing if beta is positive and significant, decreasing if beta is negative and significant, and other if the ANOVA were significant rather than the linear regression. Local eQTL is 1 if the gene had a significant local eQTL**

| Gene               | Tissue  | Anova.pval | Beta      | Pval     | EffectCategory | Local eQTL |
|--------------------|---------|------------|-----------|----------|----------------|------------|
| <i>APEX2</i>       | Adrenal | 3.06E-08   | -0.00076  | 1.34E-08 | decreasing     | 0          |
| <i>APPL2</i>       | Adrenal | 7.66E-10   | 0.000203  | 0.167808 | other          | 0          |
| <i>ARF6</i>        | Adrenal | 2.89E-10   | -0.00034  | 0.019937 | other          | 0          |
| <i>ARHGAP11A</i>   | Adrenal | 6.54E-13   | -0.00083  | 1.38E-11 | decreasing     | 0          |
| <i>ARHGAP33</i>    | Adrenal | 2.11E-08   | 0.000232  | 0.115129 | other          | 0          |
| <i>ARHGDIB</i>     | Adrenal | 2.22E-09   | -0.00062  | 1.14E-05 | decreasing     | 0          |
| <i>ARHGEF10L</i>   | Adrenal | 1.17E-07   | 0.000274  | 0.058003 | other          | 0          |
| <i>ARHGEF28</i>    | Adrenal | 6.23E-09   | 0.000491  | 0.000414 | other          | 0          |
| <i>ARHGEF37</i>    | Adrenal | 2.52E-07   | 6.47E-05  | 0.66333  | other          | 0          |
| <i>ARHGEF5</i>     | Adrenal | 2.23E-08   | 0.000104  | 0.491124 | other          | 0          |
| <i>ARHGEF9</i>     | Adrenal | 1.10E-08   | 0.000698  | 1.89E-07 | increasing     | 0          |
| <i>ARL2</i>        | Adrenal | 2.79E-06   | -0.00071  | 2.24E-07 | decreasing     | 0          |
| <i>ASPM</i>        | Adrenal | 3.71E-10   | -0.00079  | 5.35E-10 | decreasing     | 0          |
| <i>ASPN</i>        | Adrenal | 1.67E-07   | -0.00075  | 1.79E-08 | decreasing     | 0          |
| <i>ATG7</i>        | Adrenal | 2.56E-08   | -0.00069  | 4.62E-07 | decreasing     | 0          |
| <i>ATP4A</i>       | Adrenal | 7.11E-09   | -0.00061  | 8.74E-06 | decreasing     | 1          |
| <i>ATP5A1</i>      | Adrenal | 1.60E-07   | -0.00071  | 1.88E-07 | decreasing     | 0          |
| <i>ATP7B</i>       | Adrenal | 1.29E-11   | 0.000727  | 6.41E-08 | increasing     | 0          |
| <i>AURKA</i>       | Adrenal | 1.76E-11   | -0.00077  | 3.27E-09 | decreasing     | 0          |
| <i>AVP</i>         | Adrenal | 6.02E-09   | 0.000476  | 0.001157 | other          | 0          |
| <i>B4GALT5</i>     | Adrenal | 5.26E-09   | -0.00065  | 1.68E-06 | decreasing     | 0          |
| <i>BAHCC1</i>      | Adrenal | 1.26E-16   | 0.000747  | 2.20E-08 | increasing     | 0          |
| <i>BAK1</i>        | Adrenal | 1.15E-08   | -0.00067  | 1.15E-06 | decreasing     | 1          |
| <i>BCKDK</i>       | Adrenal | 1.46E-15   | -0.00086  | 3.45E-12 | decreasing     | 0          |
| <i>BCL6</i>        | Adrenal | 4.48E-12   | 0.000714  | 8.17E-08 | increasing     | 0          |
| <i>BCL7A</i>       | Adrenal | 1.51E-06   | -0.00075  | 2.11E-08 | decreasing     | 0          |
| <i>BCL7C</i>       | Adrenal | 1.91E-07   | -0.00022  | 0.141291 | other          | 0          |
| <i>BEND7</i>       | Adrenal | 5.05E-12   | 0.000802  | 3.69E-10 | increasing     | 0          |
| <i>BHLHB9</i>      | Adrenal | 1.08E-08   | 0.000666  | 1.22E-06 | increasing     | 0          |
| <i>BIRC5</i>       | Adrenal | 2.11E-13   | -0.00076  | 7.25E-09 | decreasing     | 0          |
| <i>BLMH</i>        | Adrenal | 3.40E-10   | -0.00069  | 2.45E-07 | decreasing     | 0          |
| <i>BMP3</i>        | Adrenal | 3.49E-08   | -0.00071  | 1.29E-07 | decreasing     | 0          |
| <i>BRD2</i>        | Adrenal | 3.47E-09   | 0.000316  | 0.032069 | other          | 0          |
| <i>BRSK1</i>       | Adrenal | 7.21E-09   | -1.45E-05 | 0.923278 | other          | 0          |
| <i>BUB1</i>        | Adrenal | 8.94E-12   | -0.00079  | 5.34E-10 | decreasing     | 0          |
| <i>BUB1B</i>       | Adrenal | 2.99E-11   | -0.00078  | 2.43E-09 | decreasing     | 0          |
| <i>BZRAP1</i>      | Adrenal | 2.07E-08   | 0.000398  | 0.007218 | other          | 0          |
| <i>C11H12orf75</i> | Adrenal | 7.75E-08   | 0.000135  | 0.361226 | other          | 0          |
| <i>C12H9orf173</i> | Adrenal | 3.70E-08   | 0.000109  | 0.466527 | other          | 0          |
| <i>C13H6orf203</i> | Adrenal | 1.24E-08   | -0.00059  | 1.69E-05 | decreasing     | 0          |



**Supplementary Table 9. Genes with a significant age effect from either ANOVA or linear regression. Beta is the regression coefficient, Pval is the p-value for the regression coefficient of expression on age (in days). Effect category is increasing if beta is positive and significant, decreasing if beta is negative and significant, and other if the ANOVA were significant rather than the linear regression. Local eQTL is 1 if the gene had a significant local eQTL**

| Gene               | Tissue  | Anova.pval | Beta     | Pval     | EffectCategory | Local eQTL |
|--------------------|---------|------------|----------|----------|----------------|------------|
| <i>C19H22orf39</i> | Adrenal | 9.10E-09   | 0.000381 | 0.009846 | other          | 0          |
| <i>C1H11orf57</i>  | Adrenal | 7.89E-08   | -0.00043 | 0.002859 | other          | 0          |
| <i>C20H1orf50</i>  | Adrenal | 1.19E-07   | -0.00044 | 0.002092 | other          | 0          |
| <i>C21H7orf73</i>  | Adrenal | 2.50E-11   | -0.0008  | 1.84E-10 | decreasing     | 0          |
| <i>C23H5orf46</i>  | Adrenal | 1.88E-07   | -0.00028 | 0.020073 | other          | 0          |
| <i>C25H1orf101</i> | Adrenal | 8.21E-08   | 0.000651 | 2.65E-06 | increasing     | 1          |
| <i>C2CD2L</i>      | Adrenal | 2.33E-07   | 0.000286 | 0.047375 | other          | 0          |
| <i>C3AR1</i>       | Adrenal | 2.47E-07   | -0.00055 | 0.000118 | other          | 0          |
| <i>C5H16orf62</i>  | Adrenal | 2.29E-09   | -0.00015 | 0.33484  | other          | 0          |
| <i>C7H4orf45</i>   | Adrenal | 1.00E-07   | 0.000294 | 0.036891 | other          | 0          |
| <i>C8H8orf88</i>   | Adrenal | 2.03E-07   | 0.000669 | 3.73E-07 | increasing     | 0          |
| <i>CAMK2B</i>      | Adrenal | 2.10E-07   | 0.000597 | 1.96E-05 | increasing     | 0          |
| <i>CAMK2D</i>      | Adrenal | 7.82E-10   | 0.000705 | 1.65E-07 | increasing     | 0          |
| <i>CAMSAP3</i>     | Adrenal | 9.60E-09   | 0.000625 | 4.99E-06 | increasing     | 0          |
| <i>CANT1</i>       | Adrenal | 3.35E-09   | -0.00067 | 1.01E-06 | decreasing     | 0          |
| <i>CAP2</i>        | Adrenal | 2.54E-08   | 0.000551 | 7.12E-05 | increasing     | 0          |
| <i>CAPN6</i>       | Adrenal | 4.50E-08   | -0.00071 | 1.93E-07 | decreasing     | 0          |
| <i>CAV1</i>        | Adrenal | 2.09E-11   | -0.00053 | 0.000233 | other          | 0          |
| <i>CBX7</i>        | Adrenal | 4.59E-12   | 0.000696 | 1.72E-07 | increasing     | 0          |
| <i>CCDC136</i>     | Adrenal | 2.25E-07   | 0.000648 | 2.25E-06 | increasing     | 0          |
| <i>CCDC78</i>      | Adrenal | 2.42E-12   | 0.000241 | 0.109926 | other          | 1          |
| <i>CCNB1</i>       | Adrenal | 6.16E-09   | -0.00078 | 2.42E-09 | decreasing     | 0          |
| <i>CCNB2</i>       | Adrenal | 1.23E-12   | -0.00084 | 1.83E-11 | decreasing     | 0          |
| <i>CCND2</i>       | Adrenal | 7.60E-10   | 0.000711 | 1.27E-07 | increasing     | 0          |
| <i>CD177</i>       | Adrenal | 1.63E-07   | 0.000466 | 0.001209 | other          | 0          |
| <i>CD248</i>       | Adrenal | 1.33E-07   | -0.00063 | 8.80E-06 | decreasing     | 0          |
| <i>CD276</i>       | Adrenal | 3.71E-08   | -0.00058 | 2.98E-05 | decreasing     | 0          |
| <i>CD300A</i>      | Adrenal | 3.73E-05   | -0.00071 | 2.61E-07 | decreasing     | 0          |
| <i>CD79B</i>       | Adrenal | 3.53E-06   | -0.00078 | 5.96E-09 | decreasing     | 0          |
| <i>CDC25C</i>      | Adrenal | 8.10E-09   | -0.00075 | 1.32E-08 | decreasing     | 0          |
| <i>CDC34</i>       | Adrenal | 5.28E-08   | -0.00059 | 2.58E-05 | decreasing     | 0          |
| <i>CDC6</i>        | Adrenal | 1.48E-08   | -0.00076 | 6.51E-09 | decreasing     | 0          |
| <i>CDCA2</i>       | Adrenal | 3.33E-09   | -0.00073 | 2.44E-08 | decreasing     | 0          |
| <i>CDCA3</i>       | Adrenal | 1.59E-07   | -0.00075 | 1.52E-08 | decreasing     | 0          |
| <i>CDCA5</i>       | Adrenal | 1.59E-07   | -0.00077 | 9.97E-09 | decreasing     | 0          |
| <i>CDCA8</i>       | Adrenal | 4.68E-13   | -0.00087 | 6.73E-12 | decreasing     | 0          |
| <i>CDH20</i>       | Adrenal | 2.30E-07   | -0.00065 | 3.30E-06 | decreasing     | 0          |
| <i>CDK1</i>        | Adrenal | 6.80E-10   | -0.00079 | 1.17E-09 | decreasing     | 0          |
| <i>CDS1</i>        | Adrenal | 8.01E-08   | 0.000217 | 0.145706 | other          | 1          |
| <i>CELF6</i>       | Adrenal | 4.34E-08   | 0.000585 | 4.05E-05 | increasing     | 0          |

**Supplementary Table 9. Genes with a significant age effect from either ANOVA or linear regression. Beta is the regression coefficient, Pval is the p-value for the regression coefficient of expression on age (in days). Effect category is increasing if beta is positive and significant, decreasing if beta is negative and significant, and other if the ANOVA were significant rather than the linear regression. Local eQTL is 1 if the gene had a significant local eQTL**

| Gene           | Tissue  | Anova.pval | Beta     | Pval     | EffectCategory | Local eQTL |
|----------------|---------|------------|----------|----------|----------------|------------|
| <i>CENPA</i>   | Adrenal | 1.35E-10   | -0.00069 | 4.40E-07 | decreasing     | 0          |
| <i>CENPE</i>   | Adrenal | 4.33E-10   | -0.0007  | 1.05E-07 | decreasing     | 0          |
| <i>CENPF</i>   | Adrenal | 2.36E-14   | -0.00085 | 3.48E-12 | decreasing     | 0          |
| <i>CEP170B</i> | Adrenal | 1.44E-07   | 0.000472 | 0.000732 | other          | 0          |
| <i>CEP250</i>  | Adrenal | 2.80E-10   | 0.000566 | 6.18E-05 | increasing     | 0          |
| <i>CEP55</i>   | Adrenal | 2.11E-10   | -0.00076 | 1.38E-08 | decreasing     | 0          |
| <i>CEP83</i>   | Adrenal | 7.66E-12   | 0.000752 | 5.20E-09 | increasing     | 0          |
| <i>CHMP1A</i>  | Adrenal | 3.57E-05   | -0.00071 | 1.67E-07 | decreasing     | 0          |
| <i>CKAP2</i>   | Adrenal | 9.24E-10   | -0.0008  | 7.81E-10 | decreasing     | 0          |
| <i>CKAP2L</i>  | Adrenal | 1.85E-08   | -0.00051 | 0.000319 | other          | 0          |
| <i>CKAP4</i>   | Adrenal | 7.32E-08   | -0.00041 | 0.004858 | other          | 0          |
| <i>CKS2</i>    | Adrenal | 1.70E-07   | -0.00077 | 8.89E-09 | decreasing     | 0          |
| <i>CLASP2</i>  | Adrenal | 1.23E-07   | 0.000711 | 2.14E-07 | increasing     | 0          |
| <i>CLDN11</i>  | Adrenal | 1.68E-08   | -0.00054 | 0.000133 | other          | 0          |
| <i>CLEC1A</i>  | Adrenal | 2.73E-08   | -0.00031 | 0.031339 | other          | 0          |
| <i>CLIC1</i>   | Adrenal | 4.57E-07   | -0.00071 | 1.39E-07 | decreasing     | 1          |
| <i>CLK1</i>    | Adrenal | 6.49E-09   | 0.000542 | 0.000141 | other          | 0          |
| <i>CLP1</i>    | Adrenal | 7.93E-09   | -0.0006  | 1.78E-05 | decreasing     | 0          |
| <i>CNDP2</i>   | Adrenal | 4.56E-10   | -0.00055 | 9.28E-05 | decreasing     | 0          |
| <i>CNR1</i>    | Adrenal | 8.35E-08   | 0.000641 | 2.45E-06 | increasing     | 0          |
| <i>COASY</i>   | Adrenal | 3.39E-06   | -0.00073 | 9.09E-09 | decreasing     | 0          |
| <i>COL1A1</i>  | Adrenal | 5.35E-13   | -0.0008  | 4.12E-10 | decreasing     | 0          |
| <i>COL1A2</i>  | Adrenal | 4.00E-13   | -0.00081 | 1.98E-10 | decreasing     | 0          |
| <i>COL3A1</i>  | Adrenal | 1.33E-12   | -0.00079 | 1.03E-09 | decreasing     | 0          |
| <i>COL4A1</i>  | Adrenal | 3.67E-08   | -0.00059 | 3.18E-05 | decreasing     | 0          |
| <i>COL5A2</i>  | Adrenal | 2.57E-07   | -0.00043 | 0.003368 | other          | 0          |
| <i>COL8A2</i>  | Adrenal | 5.96E-07   | -0.00075 | 2.36E-08 | decreasing     | 0          |
| <i>COLEC12</i> | Adrenal | 4.01E-08   | -0.00051 | 0.000363 | other          | 0          |
| <i>COPS5</i>   | Adrenal | 3.86E-09   | -0.00066 | 2.67E-06 | decreasing     | 0          |
| <i>COQ5</i>    | Adrenal | 2.54E-09   | -0.00071 | 1.07E-07 | decreasing     | 0          |
| <i>COQ9</i>    | Adrenal | 9.13E-13   | -0.00075 | 9.58E-09 | decreasing     | 0          |
| <i>COTL1</i>   | Adrenal | 5.57E-08   | -0.0007  | 2.87E-07 | decreasing     | 0          |
| <i>CPNE2</i>   | Adrenal | 1.58E-06   | -0.00071 | 2.31E-07 | decreasing     | 0          |
| <i>CPNE8</i>   | Adrenal | 3.43E-08   | 0.000652 | 1.24E-06 | increasing     | 0          |
| <i>CPT1A</i>   | Adrenal | 2.70E-08   | -0.00076 | 1.09E-08 | decreasing     | 0          |
| <i>CPT1B</i>   | Adrenal | 4.99E-08   | -0.00064 | 2.86E-06 | decreasing     | 0          |
| <i>CPT2</i>    | Adrenal | 1.53E-13   | -0.00081 | 1.68E-10 | decreasing     | 0          |
| <i>CPVL</i>    | Adrenal | 2.85E-09   | -0.00075 | 2.98E-09 | decreasing     | 0          |
| <i>CPXM1</i>   | Adrenal | 5.60E-10   | -0.00067 | 1.02E-06 | decreasing     | 0          |
| <i>CPXM2</i>   | Adrenal | 7.92E-08   | -0.00023 | 0.114092 | other          | 0          |

**Supplementary Table 9. Genes with a significant age effect from either ANOVA or linear regression. Beta is the regression coefficient, Pval is the p-value for the regression coefficient of expression on age (in days). Effect category is increasing if beta is positive and significant, decreasing if beta is negative and significant, and other if the ANOVA were significant rather than the linear regression. Local eQTL is 1 if the gene had a significant local eQTL**

| Gene           | Tissue  | Anova.pval | Beta     | Pval     | EffectCategory | Local eQTL |
|----------------|---------|------------|----------|----------|----------------|------------|
| <i>CPZ</i>     | Adrenal | 7.24E-08   | -0.00059 | 2.82E-05 | decreasing     | 0          |
| <i>CRABP2</i>  | Adrenal | 2.04E-07   | -0.00069 | 4.00E-07 | decreasing     | 0          |
| <i>CRAMP1L</i> | Adrenal | 1.67E-11   | 0.000361 | 0.01422  | other          | 0          |
| <i>CRHR1</i>   | Adrenal | 4.39E-08   | 0.000632 | 2.16E-06 | increasing     | 0          |
| <i>CS</i>      | Adrenal | 1.83E-09   | -0.00067 | 7.53E-07 | decreasing     | 0          |
| <i>CTC1</i>    | Adrenal | 1.68E-11   | 0.000413 | 0.004215 | other          | 0          |
| <i>CTH</i>     | Adrenal | 2.37E-07   | 0.000535 | 0.000177 | other          | 0          |
| <i>CTIF</i>    | Adrenal | 2.54E-08   | -0.00012 | 0.415788 | other          | 0          |
| <i>CTSA</i>    | Adrenal | 9.15E-08   | -0.0006  | 1.13E-05 | decreasing     | 1          |
| <i>CUL9</i>    | Adrenal | 5.76E-09   | 0.000283 | 0.057442 | other          | 0          |
| <i>DAP3</i>    | Adrenal | 1.76E-08   | -0.00069 | 5.63E-07 | decreasing     | 0          |
| <i>DCLK3</i>   | Adrenal | 7.03E-08   | -0.00042 | 0.00473  | other          | 0          |
| <i>DDX19A</i>  | Adrenal | 3.49E-08   | -0.00063 | 6.39E-06 | decreasing     | 0          |
| <i>DDX47</i>   | Adrenal | 2.29E-08   | -0.00068 | 2.78E-07 | decreasing     | 0          |
| <i>DDX5</i>    | Adrenal | 2.50E-09   | 0.000298 | 0.038929 | other          | 0          |
| <i>DGKQ</i>    | Adrenal | 1.14E-10   | 0.000267 | 0.064755 | other          | 0          |
| <i>DHCR7</i>   | Adrenal | 1.58E-07   | 0.000534 | 0.000231 | other          | 0          |
| <i>DLD</i>     | Adrenal | 4.52E-09   | -0.00074 | 2.29E-08 | decreasing     | 0          |
| <i>DLG4</i>    | Adrenal | 1.25E-07   | 0.000165 | 0.267995 | other          | 0          |
| <i>DLGAP5</i>  | Adrenal | 6.38E-11   | -0.00074 | 1.94E-08 | decreasing     | 0          |
| <i>DMKN</i>    | Adrenal | 5.42E-08   | -0.00069 | 3.86E-07 | decreasing     | 0          |
| <i>DMTF1</i>   | Adrenal | 2.42E-07   | 0.000587 | 3.31E-05 | increasing     | 0          |
| <i>DNAH11</i>  | Adrenal | 9.05E-08   | -0.00059 | 2.63E-05 | decreasing     | 0          |
| <i>DNAJA3</i>  | Adrenal | 1.20E-05   | -0.00071 | 2.52E-07 | decreasing     | 0          |
| <i>DNAJC3</i>  | Adrenal | 7.98E-08   | 0.000473 | 0.001024 | other          | 0          |
| <i>DNAJC6</i>  | Adrenal | 5.57E-11   | 0.000785 | 2.15E-09 | increasing     | 0          |
| <i>DND1</i>    | Adrenal | 6.95E-07   | -0.0007  | 2.17E-07 | decreasing     | 0          |
| <i>DNMT3B</i>  | Adrenal | 2.16E-07   | 0.000606 | 1.91E-05 | increasing     | 0          |
| <i>DOCK3</i>   | Adrenal | 4.43E-08   | 0.000506 | 0.000371 | other          | 0          |
| <i>DOT1L</i>   | Adrenal | 1.37E-07   | -0.0002  | 0.167192 | other          | 0          |
| <i>DPH2</i>    | Adrenal | 3.37E-07   | -0.00074 | 2.87E-08 | decreasing     | 0          |
| <i>DPM2</i>    | Adrenal | 9.92E-11   | -0.00076 | 5.57E-09 | decreasing     | 0          |
| <i>DPP4</i>    | Adrenal | 2.94E-07   | 0.000758 | 1.65E-08 | increasing     | 0          |
| <i>DTL</i>     | Adrenal | 7.29E-08   | -0.00067 | 7.07E-07 | decreasing     | 0          |
| <i>DTWD1</i>   | Adrenal | 1.23E-08   | 0.000291 | 0.050058 | other          | 0          |
| <i>DUSP3</i>   | Adrenal | 4.52E-08   | 3.22E-05 | 0.831681 | other          | 0          |
| <i>E2F1</i>    | Adrenal | 2.07E-09   | -0.00075 | 1.65E-08 | decreasing     | 0          |
| <i>E2F2</i>    | Adrenal | 2.97E-09   | -0.00074 | 3.58E-08 | decreasing     | 0          |
| <i>E2F8</i>    | Adrenal | 2.54E-09   | -0.00067 | 5.34E-07 | decreasing     | 0          |
| <i>ECHS1</i>   | Adrenal | 3.41E-07   | -0.00073 | 8.36E-08 | decreasing     | 0          |

**Supplementary Table 9. Genes with a significant age effect from either ANOVA or linear regression. Beta is the regression coefficient, Pval is the p-value for the regression coefficient of expression on age (in days). Effect category is increasing if beta is positive and significant, decreasing if beta is negative and significant, and other if the ANOVA were significant rather than the linear regression. Local eQTL is 1 if the gene had a significant local eQTL**

| Gene            | Tissue  | Anova.pval | Beta     | Pval     | EffectCategory | Local eQTL |
|-----------------|---------|------------|----------|----------|----------------|------------|
| <i>ECI2</i>     | Adrenal | 8.42E-08   | -0.00068 | 7.09E-07 | decreasing     | 0          |
| <i>ECSIT</i>    | Adrenal | 2.49E-06   | -0.00073 | 8.47E-08 | decreasing     | 0          |
| <i>EDIL3</i>    | Adrenal | 9.85E-08   | 0.00068  | 3.09E-07 | increasing     | 0          |
| <i>EDNRB</i>    | Adrenal | 7.92E-10   | -0.00071 | 6.03E-08 | decreasing     | 0          |
| <i>EFHD1</i>    | Adrenal | 1.77E-07   | -0.0005  | 0.000464 | other          | 0          |
| <i>EHD3</i>     | Adrenal | 1.05E-06   | -0.00072 | 1.42E-07 | decreasing     | 0          |
| <i>EIF2S2</i>   | Adrenal | 7.08E-08   | -0.00044 | 0.002847 | other          | 0          |
| <i>EIF4E2</i>   | Adrenal | 6.28E-10   | -0.00064 | 3.98E-06 | decreasing     | 0          |
| <i>ELF4</i>     | Adrenal | 2.59E-10   | -0.00064 | 2.34E-06 | decreasing     | 0          |
| <i>ELFN2</i>    | Adrenal | 7.04E-08   | 0.000538 | 0.000155 | other          | 0          |
| <i>ELN</i>      | Adrenal | 4.08E-08   | -0.00054 | 0.00017  | other          | 0          |
| <i>EML2</i>     | Adrenal | 4.04E-08   | 0.000508 | 0.000386 | other          | 0          |
| <i>ENO2</i>     | Adrenal | 6.00E-08   | 0.000513 | 0.000256 | other          | 1          |
| <i>ENPP4</i>    | Adrenal | 1.43E-08   | 0.000744 | 1.65E-08 | increasing     | 0          |
| <i>ENPP5</i>    | Adrenal | 6.22E-09   | 0.000762 | 5.73E-09 | increasing     | 0          |
| <i>EPB41</i>    | Adrenal | 1.23E-08   | 0.000745 | 2.15E-08 | increasing     | 0          |
| <i>EPB41L5</i>  | Adrenal | 9.06E-09   | 0.000792 | 1.68E-09 | increasing     | 0          |
| <i>ERAL1</i>    | Adrenal | 3.64E-07   | -0.00075 | 2.12E-08 | decreasing     | 0          |
| <i>ERBB4</i>    | Adrenal | 4.51E-09   | 0.000751 | 1.70E-08 | increasing     | 0          |
| <i>ERO1LB</i>   | Adrenal | 2.27E-09   | 0.000643 | 4.61E-06 | increasing     | 0          |
| <i>ESPL1</i>    | Adrenal | 2.63E-06   | -0.00073 | 4.20E-08 | decreasing     | 0          |
| <i>ESYT1</i>    | Adrenal | 4.26E-12   | 0.000655 | 7.25E-07 | increasing     | 0          |
| <i>ETFA</i>     | Adrenal | 2.14E-08   | -0.00072 | 1.02E-07 | decreasing     | 0          |
| <i>ETFDH</i>    | Adrenal | 1.65E-08   | -0.00068 | 3.72E-07 | decreasing     | 0          |
| <i>ETNK1</i>    | Adrenal | 2.95E-08   | 0.000471 | 0.000758 | other          | 0          |
| <i>ETS2</i>     | Adrenal | 1.74E-08   | -0.00067 | 1.47E-06 | decreasing     | 0          |
| <i>EVA1B</i>    | Adrenal | 2.72E-10   | -0.00067 | 1.00E-06 | decreasing     | 0          |
| <i>EXO1</i>     | Adrenal | 1.63E-09   | -0.00072 | 4.33E-08 | decreasing     | 0          |
| <i>FAM101A</i>  | Adrenal | 1.73E-07   | -0.00067 | 1.37E-06 | decreasing     | 0          |
| <i>FAM103A1</i> | Adrenal | 9.77E-08   | -0.00046 | 0.001282 | other          | 0          |
| <i>FAM13B</i>   | Adrenal | 4.70E-08   | 0.000616 | 6.03E-06 | increasing     | 0          |
| <i>FAM155A</i>  | Adrenal | 1.61E-09   | 0.000619 | 7.78E-06 | increasing     | 0          |
| <i>FAM155B</i>  | Adrenal | 2.07E-07   | 0.000152 | 0.298289 | other          | 0          |
| <i>FAM160A1</i> | Adrenal | 8.96E-07   | 0.000722 | 7.15E-08 | increasing     | 0          |
| <i>FAM198A</i>  | Adrenal | 6.79E-08   | 0.000405 | 0.004259 | other          | 0          |
| <i>FAM221A</i>  | Adrenal | 4.50E-09   | 0.000659 | 1.07E-06 | increasing     | 0          |
| <i>FAM43B</i>   | Adrenal | 4.66E-08   | -0.00018 | 0.231492 | other          | 0          |
| <i>FAM53C</i>   | Adrenal | 1.12E-08   | 7.02E-05 | 0.640182 | other          | 0          |
| <i>FARS2</i>    | Adrenal | 4.95E-09   | -0.00079 | 3.10E-09 | decreasing     | 0          |
| <i>FBLIM1</i>   | Adrenal | 7.34E-13   | -0.00085 | 2.38E-11 | decreasing     | 0          |

**Supplementary Table 9. Genes with a significant age effect from either ANOVA or linear regression. Beta is the regression coefficient, Pval is the p-value for the regression coefficient of expression on age (in days). Effect category is increasing if beta is positive and significant, decreasing if beta is negative and significant, and other if the ANOVA were significant rather than the linear regression. Local eQTL is 1 if the gene had a significant local eQTL**

| Gene            | Tissue  | Anova.pval | Beta     | Pval     | EffectCategory | Local eQTL |
|-----------------|---------|------------|----------|----------|----------------|------------|
| <i>FBN2</i>     | Adrenal | 2.38E-14   | -0.00083 | 5.89E-11 | decreasing     | 0          |
| <i>FGF14</i>    | Adrenal | 6.46E-09   | 0.000687 | 3.32E-07 | increasing     | 0          |
| <i>FGFR1OP2</i> | Adrenal | 1.23E-09   | 0.000581 | 3.39E-05 | increasing     | 0          |
| <i>FKBP1A</i>   | Adrenal | 5.63E-08   | -0.00056 | 8.36E-05 | decreasing     | 0          |
| <i>FNDC1</i>    | Adrenal | 5.20E-08   | -0.00066 | 5.18E-07 | decreasing     | 0          |
| <i>FOXD1</i>    | Adrenal | 2.72E-09   | -0.00037 | 0.014712 | other          | 0          |
| <i>FOXP1</i>    | Adrenal | 5.64E-08   | 2.12E-05 | 0.885449 | other          | 0          |
| <i>FSCN1</i>    | Adrenal | 1.54E-06   | -0.00073 | 6.91E-08 | decreasing     | 0          |
| <i>GABBR1</i>   | Adrenal | 1.99E-09   | 0.000594 | 1.09E-05 | increasing     | 0          |
| <i>GALK1</i>    | Adrenal | 5.38E-10   | -0.00062 | 5.17E-06 | decreasing     | 0          |
| <i>GALNT12</i>  | Adrenal | 1.54E-10   | 0.000455 | 0.00176  | other          | 0          |
| <i>GAPDH</i>    | Adrenal | 5.39E-08   | -0.0007  | 2.48E-07 | decreasing     | 0          |
| <i>GCFC2</i>    | Adrenal | 5.56E-09   | 0.000195 | 0.199128 | other          | 0          |
| <i>GDAP1</i>    | Adrenal | 4.12E-08   | 0.000645 | 3.07E-06 | increasing     | 0          |
| <i>GDI2</i>     | Adrenal | 9.03E-08   | -0.00018 | 0.219284 | other          | 0          |
| <i>GK5</i>      | Adrenal | 9.61E-13   | 0.000811 | 2.61E-10 | increasing     | 0          |
| <i>GLCC1</i>    | Adrenal | 1.40E-07   | 0.000731 | 5.22E-08 | increasing     | 0          |
| <i>GLIS2</i>    | Adrenal | 1.10E-07   | -0.00064 | 2.18E-06 | decreasing     | 0          |
| <i>GMNN</i>     | Adrenal | 1.89E-08   | -0.00067 | 6.45E-07 | decreasing     | 0          |
| <i>GNB1</i>     | Adrenal | 1.53E-07   | -0.00049 | 0.000371 | other          | 0          |
| <i>GNB5</i>     | Adrenal | 1.82E-07   | 0.000403 | 0.005693 | other          | 0          |
| <i>GNG12</i>    | Adrenal | 1.67E-09   | 0.000748 | 2.16E-08 | increasing     | 0          |
| <i>GNG7</i>     | Adrenal | 1.39E-07   | 0.000615 | 9.06E-06 | increasing     | 0          |
| <i>GOLGA7</i>   | Adrenal | 4.22E-09   | -0.00079 | 2.31E-09 | decreasing     | 0          |
| <i>GOT2</i>     | Adrenal | 7.12E-13   | -0.00072 | 5.10E-08 | decreasing     | 0          |
| <i>GPC4</i>     | Adrenal | 1.02E-09   | -0.00072 | 1.97E-08 | decreasing     | 0          |
| <i>GPC6</i>     | Adrenal | 5.10E-08   | 0.000102 | 0.485496 | other          | 0          |
| <i>GPM6A</i>    | Adrenal | 2.28E-08   | 0.000647 | 3.88E-06 | increasing     | 0          |
| <i>GPR1</i>     | Adrenal | 2.81E-08   | 0.000547 | 0.000121 | other          | 0          |
| <i>GPR137B</i>  | Adrenal | 2.60E-08   | -0.00036 | 0.013195 | other          | 0          |
| <i>GPR155</i>   | Adrenal | 9.03E-07   | 0.000686 | 1.48E-07 | increasing     | 0          |
| <i>GPR17</i>    | Adrenal | 1.72E-07   | 0.000278 | 0.06549  | other          | 0          |
| <i>GPX7</i>     | Adrenal | 7.76E-13   | -0.0007  | 8.71E-08 | decreasing     | 0          |
| <i>GRB10</i>    | Adrenal | 6.77E-14   | 0.000799 | 1.30E-09 | increasing     | 0          |
| <i>GRB14</i>    | Adrenal | 7.06E-11   | 0.000213 | 0.142766 | other          | 0          |
| <i>GREB1</i>    | Adrenal | 4.18E-08   | 0.000143 | 0.33783  | other          | 0          |
| <i>GRIN3B</i>   | Adrenal | 2.01E-07   | 0.000183 | 0.218782 | other          | 0          |
| <i>GRIPAP1</i>  | Adrenal | 3.26E-09   | 0.00034  | 0.019181 | other          | 0          |
| <i>GRSF1</i>    | Adrenal | 2.37E-07   | -0.00039 | 0.006396 | other          | 0          |
| <i>GSTM5</i>    | Adrenal | 7.62E-08   | 0.000607 | 1.02E-05 | increasing     | 1          |

**Supplementary Table 9. Genes with a significant age effect from either ANOVA or linear regression. Beta is the regression coefficient, Pval is the p-value for the regression coefficient of expression on age (in days). Effect category is increasing if beta is positive and significant, decreasing if beta is negative and significant, and other if the ANOVA were significant rather than the linear regression. Local eQTL is 1 if the gene had a significant local eQTL**

| Gene             | Tissue  | Anova.pval | Beta     | Pval     | EffectCategory | Local eQTL |
|------------------|---------|------------|----------|----------|----------------|------------|
| <i>GTF3C2</i>    | Adrenal | 2.27E-07   | -0.00075 | 1.45E-08 | decreasing     | 0          |
| <i>GTSE1</i>     | Adrenal | 1.76E-08   | -0.0007  | 1.47E-07 | decreasing     | 0          |
| <i>HDAC6</i>     | Adrenal | 1.47E-09   | 0.000213 | 0.142772 | other          | 0          |
| <i>HERC3</i>     | Adrenal | 4.80E-09   | 0.00063  | 3.95E-06 | increasing     | 0          |
| <i>HHEX</i>      | Adrenal | 3.46E-08   | -0.00045 | 0.001571 | other          | 0          |
| <i>HJURP</i>     | Adrenal | 2.01E-14   | -0.00086 | 1.26E-11 | decreasing     | 0          |
| <i>HMGA2</i>     | Adrenal | 8.55E-08   | -0.00044 | 0.001045 | other          | 0          |
| <i>HMMR</i>      | Adrenal | 5.12E-07   | -0.00072 | 4.71E-08 | decreasing     | 0          |
| <i>HN1</i>       | Adrenal | 9.30E-09   | -0.00065 | 3.19E-06 | decreasing     | 0          |
| <i>HNRNPA2B1</i> | Adrenal | 2.49E-07   | 0.000207 | 0.169268 | other          | 0          |
| <i>HOPX</i>      | Adrenal | 2.66E-12   | -0.00079 | 4.47E-10 | decreasing     | 0          |
| <i>HOXB5</i>     | Adrenal | 1.79E-07   | 0.000439 | 0.002259 | other          | 0          |
| <i>HOXB6</i>     | Adrenal | 2.23E-07   | 0.000503 | 0.000285 | other          | 0          |
| <i>HOXB7</i>     | Adrenal | 5.29E-08   | 0.000569 | 4.31E-05 | increasing     | 0          |
| <i>HOXB8</i>     | Adrenal | 7.21E-11   | 0.00073  | 3.82E-08 | increasing     | 0          |
| <i>HS3ST3A1</i>  | Adrenal | 4.81E-13   | -0.00086 | 3.71E-12 | decreasing     | 0          |
| <i>HSPA9</i>     | Adrenal | 8.40E-09   | -0.00072 | 9.89E-08 | decreasing     | 0          |
| <i>HTRA3</i>     | Adrenal | 7.52E-09   | -0.00076 | 1.33E-08 | decreasing     | 0          |
| <i>HYOU1</i>     | Adrenal | 1.91E-07   | 0.000502 | 0.000447 | other          | 0          |
| <i>IDH2</i>      | Adrenal | 2.21E-10   | -0.00073 | 2.39E-08 | decreasing     | 0          |
| <i>IFITM1</i>    | Adrenal | 4.01E-10   | -0.0004  | 0.006062 | other          | 0          |
| <i>IFITM10</i>   | Adrenal | 1.00E-07   | -0.0007  | 3.29E-07 | decreasing     | 0          |
| <i>IFT172</i>    | Adrenal | 3.18E-12   | 0.000732 | 5.02E-08 | increasing     | 0          |
| <i>IGF2</i>      | Adrenal | 6.20E-10   | -0.0006  | 1.33E-05 | decreasing     | 0          |
| <i>IGF2BP2</i>   | Adrenal | 3.14E-14   | -0.00066 | 5.49E-07 | decreasing     | 0          |
| <i>IGF2BP3</i>   | Adrenal | 1.73E-13   | -0.00073 | 1.16E-08 | decreasing     | 0          |
| <i>IGFBP2</i>    | Adrenal | 5.63E-09   | -0.00068 | 4.28E-07 | decreasing     | 0          |
| <i>IGLON5</i>    | Adrenal | 1.49E-07   | 0.000353 | 0.016156 | other          | 1          |
| <i>IGSF9B</i>    | Adrenal | 7.03E-09   | 0.000703 | 2.82E-07 | increasing     | 0          |
| <i>IL1RAPL1</i>  | Adrenal | 3.76E-09   | -0.00075 | 1.44E-08 | decreasing     | 0          |
| <i>ING4</i>      | Adrenal | 3.28E-08   | -0.00065 | 1.99E-06 | decreasing     | 0          |
| <i>ING5</i>      | Adrenal | 7.16E-11   | 0.000568 | 6.27E-05 | increasing     | 1          |
| <i>INHA</i>      | Adrenal | 2.56E-10   | -0.00053 | 0.000135 | other          | 0          |
| <i>INPP4B</i>    | Adrenal | 1.18E-07   | -0.00065 | 1.41E-06 | decreasing     | 0          |
| <i>INPP5F</i>    | Adrenal | 3.80E-07   | 0.000765 | 9.82E-09 | increasing     | 0          |
| <i>INTS5</i>     | Adrenal | 8.05E-07   | -0.00071 | 2.06E-07 | decreasing     | 0          |
| <i>INTS7</i>     | Adrenal | 3.41E-09   | -0.00018 | 0.238827 | other          | 0          |
| <i>IQGAP3</i>    | Adrenal | 1.50E-07   | -0.00079 | 1.79E-09 | decreasing     | 0          |
| <i>IQSEC2</i>    | Adrenal | 5.62E-08   | 0.000386 | 0.007381 | other          | 0          |
| <i>IRF6</i>      | Adrenal | 3.20E-08   | 0.000616 | 1.12E-05 | increasing     | 0          |

**Supplementary Table 9. Genes with a significant age effect from either ANOVA or linear regression. Beta is the regression coefficient, Pval is the p-value for the regression coefficient of expression on age (in days). Effect category is increasing if beta is positive and significant, decreasing if beta is negative and significant, and other if the ANOVA were significant rather than the linear regression. Local eQTL is 1 if the gene had a significant local eQTL**

| Gene             | Tissue  | Anova.pval | Beta     | Pval     | EffectCategory | Local eQTL |
|------------------|---------|------------|----------|----------|----------------|------------|
| <i>ITGAX</i>     | Adrenal | 2.28E-08   | -0.00068 | 2.37E-07 | decreasing     | 0          |
| <i>ITGB5</i>     | Adrenal | 5.07E-11   | -0.0008  | 4.39E-10 | decreasing     | 0          |
| <i>ITGBL1</i>    | Adrenal | 1.83E-07   | 0.000507 | 0.000257 | other          | 0          |
| <i>JPH1</i>      | Adrenal | 1.79E-07   | 0.000509 | 0.000445 | other          | 0          |
| <i>KCNA2</i>     | Adrenal | 5.62E-10   | 0.000674 | 8.93E-07 | increasing     | 0          |
| <i>KCNF1</i>     | Adrenal | 3.91E-07   | -0.00068 | 1.71E-07 | decreasing     | 0          |
| <i>KCNK1</i>     | Adrenal | 2.93E-08   | -0.00065 | 1.44E-06 | decreasing     | 0          |
| <i>KCNQ1</i>     | Adrenal | 4.34E-11   | -0.00075 | 1.47E-08 | decreasing     | 0          |
| <i>KCTD18</i>    | Adrenal | 1.71E-07   | 0.000279 | 0.062374 | other          | 0          |
| <i>KCTD5</i>     | Adrenal | 1.60E-06   | -0.0007  | 1.74E-07 | decreasing     | 0          |
| <i>KDELC1</i>    | Adrenal | 3.92E-08   | -0.00064 | 1.19E-06 | decreasing     | 0          |
| <i>KIAA0101</i>  | Adrenal | 2.40E-09   | -0.00075 | 1.95E-08 | decreasing     | 0          |
| <i>KIAA0391</i>  | Adrenal | 1.67E-07   | -0.00062 | 4.13E-06 | decreasing     | 0          |
| <i>KIAA0895L</i> | Adrenal | 4.06E-10   | 0.000412 | 0.004561 | other          | 0          |
| <i>KIAA1467</i>  | Adrenal | 9.54E-08   | 0.000609 | 1.39E-05 | increasing     | 0          |
| <i>KIAA1715</i>  | Adrenal | 9.14E-08   | 0.000606 | 1.09E-05 | increasing     | 0          |
| <i>KIDINS220</i> | Adrenal | 5.11E-06   | 0.000714 | 1.86E-07 | increasing     | 0          |
| <i>KIF11</i>     | Adrenal | 6.32E-11   | -0.00075 | 2.95E-09 | decreasing     | 0          |
| <i>KIF15</i>     | Adrenal | 1.41E-08   | -0.00071 | 1.43E-07 | decreasing     | 0          |
| <i>KIF18A</i>    | Adrenal | 1.96E-09   | -0.00071 | 1.02E-07 | decreasing     | 0          |
| <i>KIF18B</i>    | Adrenal | 2.85E-07   | -0.00073 | 2.26E-08 | decreasing     | 0          |
| <i>KIF20A</i>    | Adrenal | 1.11E-10   | -0.00079 | 1.08E-09 | decreasing     | 0          |
| <i>KIF23</i>     | Adrenal | 4.80E-08   | -0.00062 | 9.14E-06 | decreasing     | 0          |
| <i>KIF2C</i>     | Adrenal | 4.14E-11   | -0.00073 | 3.75E-08 | decreasing     | 0          |
| <i>KIF4A</i>     | Adrenal | 1.09E-09   | -0.00074 | 1.13E-08 | decreasing     | 0          |
| <i>KIFC1</i>     | Adrenal | 3.56E-09   | -0.0008  | 1.53E-09 | decreasing     | 0          |
| <i>KIFC2</i>     | Adrenal | 2.09E-07   | 0.000286 | 0.050159 | other          | 0          |
| <i>KLF15</i>     | Adrenal | 1.04E-08   | 0.000541 | 0.000116 | other          | 0          |
| <i>KLHL2</i>     | Adrenal | 7.99E-10   | 0.000524 | 0.000203 | other          | 0          |
| <i>KLHL3</i>     | Adrenal | 1.31E-11   | 0.000777 | 1.78E-09 | increasing     | 0          |
| <i>KLHL32</i>    | Adrenal | 9.74E-09   | 0.000669 | 1.40E-06 | increasing     | 0          |
| <i>KLK3</i>      | Adrenal | 9.48E-09   | 0.000633 | 4.68E-06 | increasing     | 0          |
| <i>KNSTRN</i>    | Adrenal | 7.74E-10   | -0.00075 | 2.51E-08 | decreasing     | 0          |
| <i>KRI1</i>      | Adrenal | 4.48E-09   | 0.0003   | 0.037185 | other          | 0          |
| <i>LAMB2</i>     | Adrenal | 1.27E-09   | 0.000416 | 0.003669 | other          | 0          |
| <i>LBH</i>       | Adrenal | 7.75E-10   | -0.0005  | 0.000537 | other          | 0          |
| <i>LEAP2</i>     | Adrenal | 2.45E-07   | 0.000514 | 0.000296 | other          | 0          |
| <i>LENG8</i>     | Adrenal | 6.42E-08   | 0.000385 | 0.009207 | other          | 0          |
| <i>LIMD2</i>     | Adrenal | 1.58E-08   | -0.00068 | 2.79E-07 | decreasing     | 0          |
| <i>LMTK3</i>     | Adrenal | 2.04E-12   | 0.000381 | 0.009005 | other          | 0          |

**Supplementary Table 9. Genes with a significant age effect from either ANOVA or linear regression. Beta is the regression coefficient, Pval is the p-value for the regression coefficient of expression on age (in days). Effect category is increasing if beta is positive and significant, decreasing if beta is negative and significant, and other if the ANOVA were significant rather than the linear regression. Local eQTL is 1 if the gene had a significant local eQTL**

| Gene                | Tissue  | Anova.pval | Beta      | Pval     | EffectCategory | Local eQTL |
|---------------------|---------|------------|-----------|----------|----------------|------------|
| <i>LOC103214525</i> | Adrenal | 1.91E-08   | -0.00012  | 0.437459 | other          | 0          |
| <i>LOC103214682</i> | Adrenal | 6.35E-09   | -2.58E-05 | 0.863128 | other          | 0          |
| <i>LOC103215073</i> | Adrenal | 1.35E-07   | -0.00024  | 0.112893 | other          | 0          |
| <i>LOC103215169</i> | Adrenal | 7.26E-10   | -0.00034  | 0.022378 | other          | 0          |
| <i>LOC103215206</i> | Adrenal | 1.21E-11   | 0.000746  | 4.38E-09 | increasing     | 0          |
| <i>LOC103215596</i> | Adrenal | 1.38E-11   | -0.00084  | 3.23E-11 | decreasing     | 0          |
| <i>LOC103215799</i> | Adrenal | 1.72E-08   | -0.00047  | 0.00113  | other          | 0          |
| <i>LOC103215811</i> | Adrenal | 3.26E-08   | -0.0002   | 0.19586  | other          | 0          |
| <i>LOC103215822</i> | Adrenal | 1.08E-08   | -0.00064  | 3.81E-06 | decreasing     | 0          |
| <i>LOC103216057</i> | Adrenal | 2.11E-07   | -0.00072  | 1.24E-07 | decreasing     | 0          |
| <i>LOC103216143</i> | Adrenal | 2.93E-14   | -0.00026  | 0.003633 | other          | 0          |
| <i>LOC103216302</i> | Adrenal | 5.68E-08   | -0.00019  | 0.219776 | other          | 0          |
| <i>LOC103216605</i> | Adrenal | 2.09E-08   | 0.000627  | 4.54E-06 | increasing     | 0          |
| <i>LOC103216629</i> | Adrenal | 1.01E-10   | 7.02E-05  | 0.568142 | other          | 0          |
| <i>LOC103216770</i> | Adrenal | 3.22E-08   | -0.00052  | 0.000302 | other          | 0          |
| <i>LOC103217048</i> | Adrenal | 3.93E-09   | -0.00028  | 0.054182 | other          | 0          |
| <i>LOC103217611</i> | Adrenal | 1.20E-11   | 0.000707  | 4.66E-08 | increasing     | 0          |
| <i>LOC103217681</i> | Adrenal | 2.82E-09   | 0.00075   | 2.12E-08 | increasing     | 0          |
| <i>LOC103217954</i> | Adrenal | 2.56E-07   | 0.00062   | 9.85E-06 | increasing     | 0          |
| <i>LOC103218075</i> | Adrenal | 2.09E-08   | 0.000487  | 0.000684 | other          | 0          |
| <i>LOC103218076</i> | Adrenal | 1.34E-10   | 0.000501  | 0.000332 | other          | 0          |
| <i>LOC103218078</i> | Adrenal | 2.04E-10   | 0.000491  | 0.000456 | other          | 0          |
| <i>LOC103218120</i> | Adrenal | 4.16E-09   | -0.00058  | 3.56E-05 | decreasing     | 0          |
| <i>LOC103218277</i> | Adrenal | 8.17E-09   | 0.000521  | 0.000181 | other          | 0          |
| <i>LOC103218335</i> | Adrenal | 1.37E-10   | 0.000488  | 0.000547 | other          | 0          |
| <i>LOC103218342</i> | Adrenal | 2.41E-07   | 0.000469  | 0.001334 | other          | 0          |
| <i>LOC103218500</i> | Adrenal | 5.58E-10   | 0.00031   | 0.036423 | other          | 0          |
| <i>LOC103218561</i> | Adrenal | 1.92E-11   | 0.000738  | 2.37E-08 | increasing     | 0          |
| <i>LOC103218873</i> | Adrenal | 1.07E-07   | 0.000386  | 0.008864 | other          | 1          |
| <i>LOC103219292</i> | Adrenal | 4.67E-08   | 0.000496  | 0.000558 | other          | 0          |
| <i>LOC103219460</i> | Adrenal | 3.08E-08   | -0.0005   | 0.000391 | other          | 0          |
| <i>LOC103219487</i> | Adrenal | 7.57E-09   | 0.000386  | 0.0066   | other          | 0          |
| <i>LOC103219495</i> | Adrenal | 2.02E-07   | 0.000529  | 0.000151 | other          | 0          |
| <i>LOC103219590</i> | Adrenal | 5.07E-10   | -0.00019  | 0.05761  | other          | 0          |
| <i>LOC103219699</i> | Adrenal | 5.69E-08   | 0.000293  | 0.052731 | other          | 1          |
| <i>LOC103219720</i> | Adrenal | 8.78E-09   | 4.92E-06  | 0.973258 | other          | 0          |
| <i>LOC103219727</i> | Adrenal | 6.19E-08   | 0.00016   | 0.27311  | other          | 0          |
| <i>LOC103219791</i> | Adrenal | 2.38E-07   | 0.000411  | 0.003687 | other          | 1          |
| <i>LOC103219806</i> | Adrenal | 1.32E-10   | 0.000429  | 0.003211 | other          | 0          |
| <i>LOC103219855</i> | Adrenal | 2.15E-06   | -0.00072  | 1.26E-07 | decreasing     | 0          |



**Supplementary Table 9. Genes with a significant age effect from either ANOVA or linear regression. Beta is the regression coefficient, Pval is the p-value for the regression coefficient of expression on age (in days). Effect category is increasing if beta is positive and significant, decreasing if beta is negative and significant, and other if the ANOVA were significant rather than the linear regression. Local eQTL is 1 if the gene had a significant local eQTL**

| Gene                | Tissue  | Anova.pval | Beta      | Pval     | EffectCategory | Local eQTL |
|---------------------|---------|------------|-----------|----------|----------------|------------|
| <i>LOC103219913</i> | Adrenal | 1.69E-07   | 0.000504  | 0.000375 | other          | 0          |
| <i>LOC103219980</i> | Adrenal | 1.85E-07   | -0.00023  | 0.127786 | other          | 0          |
| <i>LOC103220002</i> | Adrenal | 1.56E-09   | -0.00055  | 7.53E-05 | decreasing     | 0          |
| <i>LOC103220015</i> | Adrenal | 9.10E-08   | -0.00038  | 0.009522 | other          | 0          |
| <i>LOC103220052</i> | Adrenal | 6.44E-08   | -0.00032  | 0.033481 | other          | 0          |
| <i>LOC103220535</i> | Adrenal | 6.61E-09   | 0.000515  | 0.000355 | other          | 0          |
| <i>LOC103220998</i> | Adrenal | 1.70E-07   | -2.93E-05 | 0.848492 | other          | 0          |
| <i>LOC103221080</i> | Adrenal | 1.54E-07   | -0.0002   | 0.178369 | other          | 0          |
| <i>LOC103221325</i> | Adrenal | 1.28E-07   | -0.00012  | 0.41872  | other          | 0          |
| <i>LOC103221711</i> | Adrenal | 5.43E-09   | 0.000367  | 0.013593 | other          | 0          |
| <i>LOC103221955</i> | Adrenal | 2.64E-08   | -0.00058  | 3.44E-05 | decreasing     | 0          |
| <i>LOC103222389</i> | Adrenal | 1.75E-07   | -9.68E-05 | 0.525306 | other          | 0          |
| <i>LOC103222782</i> | Adrenal | 5.77E-09   | -0.00068  | 6.63E-07 | decreasing     | 0          |
| <i>LOC103222898</i> | Adrenal | 1.54E-11   | -0.00083  | 4.72E-11 | decreasing     | 0          |
| <i>LOC103222969</i> | Adrenal | 9.72E-08   | 0.000499  | 0.000507 | other          | 0          |
| <i>LOC103223027</i> | Adrenal | 5.95E-08   | -4.12E-05 | 0.777056 | other          | 0          |
| <i>LOC103223217</i> | Adrenal | 2.85E-11   | 0.000631  | 3.13E-06 | increasing     | 0          |
| <i>LOC103223219</i> | Adrenal | 1.27E-08   | 0.000557  | 8.46E-05 | increasing     | 0          |
| <i>LOC103223276</i> | Adrenal | 2.11E-07   | 0.000521  | 0.00025  | other          | 0          |
| <i>LOC103223412</i> | Adrenal | 1.26E-07   | 0.000411  | 0.005248 | other          | 0          |
| <i>LOC103223413</i> | Adrenal | 1.70E-07   | 0.000284  | 0.060438 | other          | 0          |
| <i>LOC103223421</i> | Adrenal | 9.00E-09   | -0.00048  | 0.000892 | other          | 0          |
| <i>LOC103223422</i> | Adrenal | 7.11E-08   | -0.00071  | 6.46E-08 | decreasing     | 0          |
| <i>LOC103223583</i> | Adrenal | 2.21E-08   | 0.000545  | 0.00012  | other          | 0          |
| <i>LOC103224177</i> | Adrenal | 1.21E-08   | 0.000696  | 1.13E-08 | increasing     | 0          |
| <i>LOC103224222</i> | Adrenal | 9.15E-09   | -0.00047  | 0.001398 | other          | 0          |
| <i>LOC103224274</i> | Adrenal | 8.26E-08   | 0.000719  | 7.54E-08 | increasing     | 0          |
| <i>LOC103224310</i> | Adrenal | 5.02E-09   | -2.36E-05 | 0.875471 | other          | 0          |
| <i>LOC103224428</i> | Adrenal | 1.67E-08   | -0.00057  | 4.68E-05 | decreasing     | 0          |
| <i>LOC103224472</i> | Adrenal | 7.63E-08   | -0.00013  | 0.377428 | other          | 0          |
| <i>LOC103224513</i> | Adrenal | 9.40E-10   | -0.00063  | 7.81E-06 | decreasing     | 0          |
| <i>LOC103225645</i> | Adrenal | 7.33E-11   | 0.000739  | 1.89E-08 | increasing     | 1          |
| <i>LOC103225803</i> | Adrenal | 2.62E-08   | 0.000452  | 0.002181 | other          | 0          |
| <i>LOC103225929</i> | Adrenal | 8.02E-08   | 0.000365  | 0.014468 | other          | 0          |
| <i>LOC103226015</i> | Adrenal | 1.13E-08   | -0.00014  | 0.338574 | other          | 0          |
| <i>LOC103226801</i> | Adrenal | 2.55E-10   | 0.000798  | 8.00E-10 | increasing     | 0          |
| <i>LOC103226836</i> | Adrenal | 7.64E-08   | 0.000268  | 0.075088 | other          | 0          |
| <i>LOC103226908</i> | Adrenal | 2.23E-08   | 0.000629  | 4.66E-06 | increasing     | 0          |
| <i>LOC103227374</i> | Adrenal | 4.06E-08   | -6.19E-05 | 0.685668 | other          | 0          |
| <i>LOC103227921</i> | Adrenal | 6.21E-09   | 4.93E-05  | 0.691378 | other          | 0          |

**Supplementary Table 9. Genes with a significant age effect from either ANOVA or linear regression. Beta is the regression coefficient, Pval is the p-value for the regression coefficient of expression on age (in days). Effect category is increasing if beta is positive and significant, decreasing if beta is negative and significant, and other if the ANOVA were significant rather than the linear regression. Local eQTL is 1 if the gene had a significant local eQTL**

| Gene                | Tissue  | Anova.pval | Beta     | Pval     | EffectCategory | Local eQTL |
|---------------------|---------|------------|----------|----------|----------------|------------|
| <i>LOC103227965</i> | Adrenal | 1.87E-09   | 0.000588 | 3.50E-05 | increasing     | 0          |
| <i>LOC103228469</i> | Adrenal | 1.52E-07   | -0.00011 | 0.326262 | other          | 0          |
| <i>LOC103228547</i> | Adrenal | 1.03E-08   | 0.000648 | 2.73E-06 | increasing     | 0          |
| <i>LOC103228610</i> | Adrenal | 6.80E-08   | 9.92E-05 | 0.458497 | other          | 0          |
| <i>LOC103229081</i> | Adrenal | 9.37E-09   | -0.00047 | 0.001353 | other          | 0          |
| <i>LOC103229468</i> | Adrenal | 2.28E-08   | -0.00069 | 2.43E-07 | decreasing     | 0          |
| <i>LOC103229581</i> | Adrenal | 1.93E-09   | 0.000366 | 0.008097 | other          | 0          |
| <i>LOC103229682</i> | Adrenal | 3.82E-08   | 0.000534 | 0.000104 | other          | 0          |
| <i>LOC103229888</i> | Adrenal | 4.15E-08   | 0.000563 | 7.52E-05 | increasing     | 0          |
| <i>LOC103230072</i> | Adrenal | 3.11E-08   | -0.0001  | 0.503064 | other          | 0          |
| <i>LOC103230870</i> | Adrenal | 4.87E-09   | 0.000455 | 0.001837 | other          | 0          |
| <i>LOC103231021</i> | Adrenal | 5.12E-11   | 0.000538 | 0.00017  | other          | 0          |
| <i>LOC103231181</i> | Adrenal | 1.39E-08   | 0.000365 | 0.014334 | other          | 0          |
| <i>LOC103231233</i> | Adrenal | 2.12E-08   | -0.00041 | 0.004654 | other          | 0          |
| <i>LOC103231443</i> | Adrenal | 1.10E-08   | -0.00061 | 1.22E-05 | decreasing     | 0          |
| <i>LOC103231470</i> | Adrenal | 2.41E-07   | 0.000301 | 0.042665 | other          | 0          |
| <i>LOC103231503</i> | Adrenal | 3.07E-08   | 0.000372 | 0.012468 | other          | 0          |
| <i>LOC103231759</i> | Adrenal | 1.29E-07   | -0.00031 | 0.014843 | other          | 0          |
| <i>LOC103232029</i> | Adrenal | 1.30E-10   | -0.00078 | 7.98E-10 | decreasing     | 0          |
| <i>LOC103232075</i> | Adrenal | 2.44E-07   | 0.000183 | 0.220664 | other          | 0          |
| <i>LOC103232220</i> | Adrenal | 7.24E-08   | 0.000706 | 1.75E-07 | increasing     | 0          |
| <i>LOC103232225</i> | Adrenal | 1.11E-08   | 0.000636 | 1.77E-06 | increasing     | 0          |
| <i>LOC103232248</i> | Adrenal | 1.72E-07   | -0.00012 | 0.437187 | other          | 0          |
| <i>LOC103232258</i> | Adrenal | 8.66E-08   | -0.00064 | 5.32E-06 | decreasing     | 0          |
| <i>LOC103232371</i> | Adrenal | 1.24E-07   | 1.29E-05 | 0.921494 | other          | 0          |
| <i>LOC103232495</i> | Adrenal | 1.18E-08   | 0.000666 | 1.11E-06 | increasing     | 0          |
| <i>LOC103232675</i> | Adrenal | 1.42E-09   | -0.00022 | 0.044683 | other          | 0          |
| <i>LOC103232783</i> | Adrenal | 2.37E-08   | 0.00048  | 0.000675 | other          | 0          |
| <i>LOC103232839</i> | Adrenal | 1.20E-05   | 0.000624 | 1.15E-07 | increasing     | 0          |
| <i>LOC103232846</i> | Adrenal | 5.76E-11   | 0.000819 | 9.44E-11 | increasing     | 0          |
| <i>LOC103232870</i> | Adrenal | 3.25E-11   | -0.0008  | 7.29E-10 | decreasing     | 0          |
| <i>LOC103232983</i> | Adrenal | 4.63E-08   | -0.00074 | 2.37E-08 | decreasing     | 0          |
| <i>LOC103233446</i> | Adrenal | 8.35E-10   | 0.000615 | 1.42E-05 | increasing     | 0          |
| <i>LOC103233666</i> | Adrenal | 1.79E-07   | 0.000173 | 0.245623 | other          | 0          |
| <i>LOC103234319</i> | Adrenal | 5.71E-11   | 0.000486 | 0.00063  | other          | 0          |
| <i>LOC103234347</i> | Adrenal | 1.70E-08   | -0.00049 | 0.00056  | other          | 0          |
| <i>LOC103234417</i> | Adrenal | 5.71E-09   | -0.00067 | 1.11E-06 | decreasing     | 0          |
| <i>LOC103234458</i> | Adrenal | 2.57E-07   | 1.02E-05 | 0.94683  | other          | 0          |
| <i>LOC103234540</i> | Adrenal | 1.59E-08   | 0.000307 | 0.033182 | other          | 0          |
| <i>LOC103234987</i> | Adrenal | 2.66E-09   | 0.000393 | 0.005958 | other          | 0          |

**Supplementary Table 9. Genes with a significant age effect from either ANOVA or linear regression. Beta is the regression coefficient, Pval is the p-value for the regression coefficient of expression on age (in days). Effect category is increasing if beta is positive and significant, decreasing if beta is negative and significant, and other if the ANOVA were significant rather than the linear regression. Local eQTL is 1 if the gene had a significant local eQTL**

| Gene                | Tissue  | Anova.pval | Beta      | Pval     | EffectCategory | Local eQTL |
|---------------------|---------|------------|-----------|----------|----------------|------------|
| <i>LOC103234988</i> | Adrenal | 1.79E-07   | 0.000293  | 0.043853 | other          | 0          |
| <i>LOC103235510</i> | Adrenal | 8.25E-08   | 0.000402  | 0.005453 | other          | 0          |
| <i>LOC103235529</i> | Adrenal | 2.20E-09   | 0.000209  | 0.159281 | other          | 0          |
| <i>LOC103235723</i> | Adrenal | 3.03E-08   | 0.000166  | 0.272671 | other          | 0          |
| <i>LOC103236385</i> | Adrenal | 1.44E-08   | -0.00049  | 0.000611 | other          | 0          |
| <i>LOC103236489</i> | Adrenal | 6.69E-09   | -0.0003   | 0.043299 | other          | 0          |
| <i>LOC103236588</i> | Adrenal | 2.35E-07   | -0.00019  | 0.046746 | other          | 0          |
| <i>LOC103237601</i> | Adrenal | 1.06E-07   | 0.000219  | 0.136794 | other          | 0          |
| <i>LOC103237606</i> | Adrenal | 4.05E-08   | 0.000379  | 0.010183 | other          | 0          |
| <i>LOC103237612</i> | Adrenal | 1.41E-09   | 0.000452  | 0.002014 | other          | 0          |
| <i>LOC103237685</i> | Adrenal | 9.26E-08   | -0.00012  | 0.448578 | other          | 0          |
| <i>LOC103237714</i> | Adrenal | 1.19E-07   | -6.45E-05 | 0.660355 | other          | 0          |
| <i>LOC103237731</i> | Adrenal | 7.27E-09   | 0.00032   | 0.030562 | other          | 0          |
| <i>LOC103237932</i> | Adrenal | 3.10E-09   | 0.000343  | 0.021707 | other          | 0          |
| <i>LOC103238047</i> | Adrenal | 1.18E-09   | -0.00026  | 0.091345 | other          | 0          |
| <i>LOC103238059</i> | Adrenal | 7.98E-08   | -1.49E-05 | 0.922617 | other          | 0          |
| <i>LOC103238179</i> | Adrenal | 3.84E-10   | 0.000505  | 0.000267 | other          | 0          |
| <i>LOC103238689</i> | Adrenal | 9.25E-08   | -0.00018  | 0.210861 | other          | 0          |
| <i>LOC103238749</i> | Adrenal | 1.29E-08   | -0.00073  | 5.27E-08 | decreasing     | 0          |
| <i>LOC103238863</i> | Adrenal | 1.92E-11   | -0.00064  | 3.23E-06 | decreasing     | 0          |
| <i>LOC103239186</i> | Adrenal | 3.26E-09   | 0.000433  | 0.002957 | other          | 0          |
| <i>LOC103239433</i> | Adrenal | 3.58E-09   | 0.000368  | 0.011538 | other          | 1          |
| <i>LOC103239713</i> | Adrenal | 1.57E-07   | -2.52E-05 | 0.869467 | other          | 0          |
| <i>LOC103240394</i> | Adrenal | 5.68E-08   | -0.00014  | 0.350845 | other          | 0          |
| <i>LOC103240550</i> | Adrenal | 8.54E-08   | -0.00016  | 0.283054 | other          | 0          |
| <i>LOC103240700</i> | Adrenal | 1.14E-06   | -0.00069  | 1.15E-07 | decreasing     | 0          |
| <i>LOC103241261</i> | Adrenal | 2.66E-08   | -0.00017  | 0.268181 | other          | 0          |
| <i>LOC103241750</i> | Adrenal | 4.00E-10   | -0.00055  | 0.000145 | other          | 0          |
| <i>LOC103241820</i> | Adrenal | 5.64E-09   | 0.000478  | 0.000793 | other          | 0          |
| <i>LOC103241849</i> | Adrenal | 1.09E-15   | -0.00082  | 4.92E-11 | decreasing     | 0          |
| <i>LOC103241860</i> | Adrenal | 8.69E-08   | -0.00029  | 0.042873 | other          | 0          |
| <i>LOC103242266</i> | Adrenal | 4.49E-14   | 0.000861  | 2.33E-12 | increasing     | 0          |
| <i>LOC103242316</i> | Adrenal | 1.53E-08   | 0.00025   | 0.096251 | other          | 0          |
| <i>LOC103242374</i> | Adrenal | 2.56E-08   | 0.000446  | 0.002195 | other          | 0          |
| <i>LOC103242416</i> | Adrenal | 1.54E-14   | -0.00081  | 2.05E-10 | decreasing     | 0          |
| <i>LOC103242623</i> | Adrenal | 3.49E-08   | 0.000503  | 0.000438 | other          | 0          |
| <i>LOC103242644</i> | Adrenal | 3.22E-13   | 0.000466  | 0.001278 | other          | 0          |
| <i>LOC103243150</i> | Adrenal | 2.17E-09   | 0.000324  | 0.025655 | other          | 0          |
| <i>LOC103243227</i> | Adrenal | 1.43E-10   | -0.00071  | 1.26E-07 | decreasing     | 0          |
| <i>LOC103243406</i> | Adrenal | 2.68E-08   | 1.05E-05  | 0.945565 | other          | 0          |

**Supplementary Table 9. Genes with a significant age effect from either ANOVA or linear regression. Beta is the regression coefficient, Pval is the p-value for the regression coefficient of expression on age (in days). Effect category is increasing if beta is positive and significant, decreasing if beta is negative and significant, and other if the ANOVA were significant rather than the linear regression. Local eQTL is 1 if the gene had a significant local eQTL**

| Gene                | Tissue  | Anova.pval | Beta      | Pval     | EffectCategory | Local eQTL |
|---------------------|---------|------------|-----------|----------|----------------|------------|
| <i>LOC103243565</i> | Adrenal | 1.25E-07   | 0.000448  | 0.002256 | other          | 0          |
| <i>LOC103243610</i> | Adrenal | 4.56E-11   | 0.000704  | 1.54E-07 | increasing     | 0          |
| <i>LOC103243718</i> | Adrenal | 6.31E-09   | 0.000405  | 0.005331 | other          | 0          |
| <i>LOC103243762</i> | Adrenal | 7.91E-09   | 0.000328  | 0.0281   | other          | 0          |
| <i>LOC103244088</i> | Adrenal | 5.77E-10   | 0.000511  | 0.000385 | other          | 0          |
| <i>LOC103244129</i> | Adrenal | 3.54E-10   | 1.06E-06  | 0.994458 | other          | 0          |
| <i>LOC103244719</i> | Adrenal | 9.37E-08   | -0.00071  | 2.29E-07 | decreasing     | 0          |
| <i>LOC103245136</i> | Adrenal | 8.89E-08   | 0.00072   | 1.18E-07 | increasing     | 0          |
| <i>LOC103245138</i> | Adrenal | 1.16E-09   | 0.000666  | 1.28E-06 | increasing     | 0          |
| <i>LOC103245177</i> | Adrenal | 9.10E-10   | 0.000732  | 4.41E-08 | increasing     | 0          |
| <i>LOC103245178</i> | Adrenal | 2.44E-06   | 0.000708  | 2.35E-07 | increasing     | 0          |
| <i>LOC103245181</i> | Adrenal | 9.35E-09   | 0.000691  | 4.39E-07 | increasing     | 0          |
| <i>LOC103245320</i> | Adrenal | 1.72E-09   | -0.0005   | 0.000438 | other          | 0          |
| <i>LOC103245358</i> | Adrenal | 8.98E-08   | 7.95E-06  | 0.958186 | other          | 0          |
| <i>LOC103246025</i> | Adrenal | 2.84E-08   | 0.000618  | 1.00E-05 | increasing     | 0          |
| <i>LOC103246038</i> | Adrenal | 3.91E-08   | 0.000641  | 3.07E-06 | increasing     | 0          |
| <i>LOC103246419</i> | Adrenal | 6.05E-08   | 0.000162  | 0.282691 | other          | 0          |
| <i>LOC103246433</i> | Adrenal | 2.26E-07   | -0.0003   | 0.045604 | other          | 0          |
| <i>LOC103246486</i> | Adrenal | 3.95E-08   | 0.000555  | 0.000115 | other          | 1          |
| <i>LOC103246522</i> | Adrenal | 2.25E-07   | 0.000611  | 1.39E-05 | increasing     | 0          |
| <i>LOC103246602</i> | Adrenal | 4.14E-08   | -0.00028  | 0.063012 | other          | 0          |
| <i>LOC103246666</i> | Adrenal | 2.47E-08   | 0.000112  | 0.459475 | other          | 0          |
| <i>LOC103246766</i> | Adrenal | 2.09E-07   | 0.000469  | 0.001175 | other          | 0          |
| <i>LOC103246879</i> | Adrenal | 1.67E-07   | 0.000442  | 0.002593 | other          | 0          |
| <i>LOC103247904</i> | Adrenal | 2.24E-08   | -0.00011  | 0.3142   | other          | 0          |
| <i>LOC103248224</i> | Adrenal | 1.69E-10   | 0.000578  | 3.78E-05 | increasing     | 0          |
| <i>LOC103248994</i> | Adrenal | 1.89E-07   | -0.00034  | 0.019796 | other          | 0          |
| <i>LOC103249008</i> | Adrenal | 2.26E-07   | -6.07E-05 | 0.68702  | other          | 0          |
| <i>LOX</i>          | Adrenal | 4.04E-08   | -0.00068  | 5.22E-07 | decreasing     | 0          |
| <i>LOXL2</i>        | Adrenal | 1.32E-09   | -0.00076  | 4.61E-09 | decreasing     | 0          |
| <i>LOXL4</i>        | Adrenal | 1.03E-08   | 0.000635  | 1.88E-06 | increasing     | 0          |
| <i>LRP1</i>         | Adrenal | 1.19E-08   | 0.000578  | 2.74E-05 | increasing     | 0          |
| <i>LRRC23</i>       | Adrenal | 5.59E-09   | 0.000443  | 0.002322 | other          | 0          |
| <i>LRRC39</i>       | Adrenal | 9.62E-08   | -0.00015  | 0.290741 | other          | 0          |
| <i>LRRC8E</i>       | Adrenal | 1.17E-07   | 0.000512  | 0.000215 | other          | 0          |
| <i>LRRFIP1</i>      | Adrenal | 4.39E-06   | 0.000701  | 2.20E-07 | increasing     | 0          |
| <i>LRWD1</i>        | Adrenal | 2.31E-08   | -0.00055  | 8.19E-05 | decreasing     | 0          |
| <i>LSR</i>          | Adrenal | 9.40E-08   | -0.00066  | 7.97E-07 | decreasing     | 0          |
| <i>LSS</i>          | Adrenal | 3.74E-08   | 0.000552  | 0.000128 | other          | 0          |
| <i>MAD2L1</i>       | Adrenal | 8.36E-06   | -0.00072  | 1.55E-07 | decreasing     | 0          |

**Supplementary Table 9. Genes with a significant age effect from either ANOVA or linear regression. Beta is the regression coefficient, Pval is the p-value for the regression coefficient of expression on age (in days). Effect category is increasing if beta is positive and significant, decreasing if beta is negative and significant, and other if the ANOVA were significant rather than the linear regression. Local eQTL is 1 if the gene had a significant local eQTL**

| Gene           | Tissue  | Anova.pval | Beta      | Pval     | EffectCategory | Local eQTL |
|----------------|---------|------------|-----------|----------|----------------|------------|
| <i>MALSU1</i>  | Adrenal | 5.64E-08   | -0.00068  | 6.77E-07 | decreasing     | 0          |
| <i>MAMDC2</i>  | Adrenal | 1.02E-09   | 0.000783  | 2.20E-09 | increasing     | 0          |
| <i>MAN2A2</i>  | Adrenal | 4.96E-08   | 0.00022   | 0.144659 | other          | 0          |
| <i>MAN2C1</i>  | Adrenal | 5.68E-09   | 0.000439  | 0.002063 | other          | 0          |
| <i>MAOB</i>    | Adrenal | 7.07E-08   | 0.00071   | 6.45E-08 | increasing     | 0          |
| <i>MAP7</i>    | Adrenal | 3.92E-09   | 0.000678  | 5.11E-07 | increasing     | 0          |
| <i>MAPKBP1</i> | Adrenal | 1.06E-09   | 0.00031   | 0.040034 | other          | 0          |
| <i>MARCH3</i>  | Adrenal | 1.92E-07   | -0.00054  | 9.86E-05 | decreasing     | 0          |
| <i>MARCKS</i>  | Adrenal | 9.68E-08   | -0.00011  | 0.472105 | other          | 0          |
| <i>MARK1</i>   | Adrenal | 5.55E-11   | 0.000781  | 1.32E-09 | increasing     | 0          |
| <i>MAVS</i>    | Adrenal | 6.81E-10   | 0.000779  | 4.43E-09 | increasing     | 0          |
| <i>MAZ</i>     | Adrenal | 2.02E-07   | -0.00068  | 8.45E-07 | decreasing     | 0          |
| <i>MBOAT7</i>  | Adrenal | 4.99E-10   | -0.00077  | 3.63E-09 | decreasing     | 0          |
| <i>MCCD1</i>   | Adrenal | 2.39E-07   | -0.00032  | 0.028937 | other          | 0          |
| <i>MCF2L2</i>  | Adrenal | 1.43E-08   | 0.000594  | 1.71E-05 | increasing     | 0          |
| <i>MDK</i>     | Adrenal | 1.44E-08   | -0.00063  | 2.37E-06 | decreasing     | 0          |
| <i>ME1</i>     | Adrenal | 1.61E-09   | 0.000456  | 0.001828 | other          | 0          |
| <i>MECOM</i>   | Adrenal | 5.63E-08   | -0.00017  | 0.242053 | other          | 0          |
| <i>MED6</i>    | Adrenal | 2.25E-07   | -0.00063  | 5.26E-06 | decreasing     | 0          |
| <i>MEGF8</i>   | Adrenal | 7.46E-09   | 0.000324  | 0.030151 | other          | 0          |
| <i>MELK</i>    | Adrenal | 4.69E-10   | -0.00069  | 3.60E-07 | decreasing     | 0          |
| <i>MFAP2</i>   | Adrenal | 1.05E-12   | -0.00082  | 8.74E-11 | decreasing     | 0          |
| <i>MFAP5</i>   | Adrenal | 1.49E-07   | -0.00064  | 4.67E-06 | decreasing     | 0          |
| <i>MGAT4B</i>  | Adrenal | 2.45E-07   | -0.0007   | 1.84E-07 | decreasing     | 0          |
| <i>MGLL</i>    | Adrenal | 5.91E-07   | -0.00076  | 1.11E-08 | decreasing     | 0          |
| <i>MGRN1</i>   | Adrenal | 1.21E-08   | -0.00058  | 3.43E-05 | decreasing     | 0          |
| <i>MICAL2</i>  | Adrenal | 1.38E-07   | -4.05E-05 | 0.782671 | other          | 0          |
| <i>MKI67</i>   | Adrenal | 1.99E-11   | -0.00073  | 3.46E-08 | decreasing     | 0          |
| <i>MLLT6</i>   | Adrenal | 4.24E-10   | 0.000313  | 0.031654 | other          | 0          |
| <i>MLYCD</i>   | Adrenal | 6.69E-09   | -0.00073  | 3.39E-08 | decreasing     | 0          |
| <i>MMP10</i>   | Adrenal | 9.81E-08   | -0.00023  | 0.057503 | other          | 0          |
| <i>MMP2</i>    | Adrenal | 7.69E-08   | -0.00073  | 9.25E-08 | decreasing     | 0          |
| <i>MMP24</i>   | Adrenal | 5.29E-08   | 0.000507  | 0.000344 | other          | 0          |
| <i>MPP3</i>    | Adrenal | 2.91E-08   | 0.000386  | 0.008755 | other          | 0          |
| <i>MPP6</i>    | Adrenal | 5.43E-08   | 0.000152  | 0.308788 | other          | 0          |
| <i>MROH1</i>   | Adrenal | 2.31E-07   | 0.000326  | 0.025848 | other          | 0          |
| <i>MRPL1</i>   | Adrenal | 4.80E-08   | -0.00058  | 2.53E-05 | decreasing     | 0          |
| <i>MRPL10</i>  | Adrenal | 4.91E-08   | -0.00069  | 3.99E-07 | decreasing     | 0          |
| <i>MRPL16</i>  | Adrenal | 9.60E-10   | -0.00075  | 7.59E-09 | decreasing     | 0          |
| <i>MRPL22</i>  | Adrenal | 4.73E-08   | -0.00066  | 2.17E-06 | decreasing     | 0          |

**Supplementary Table 9. Genes with a significant age effect from either ANOVA or linear regression. Beta is the regression coefficient, Pval is the p-value for the regression coefficient of expression on age (in days). Effect category is increasing if beta is positive and significant, decreasing if beta is negative and significant, and other if the ANOVA were significant rather than the linear regression. Local eQTL is 1 if the gene had a significant local eQTL**

| Gene            | Tissue  | Anova.pval | Beta      | Pval     | EffectCategory | Local eQTL |
|-----------------|---------|------------|-----------|----------|----------------|------------|
| <i>MRPL30</i>   | Adrenal | 2.17E-07   | -0.00022  | 0.145258 | other          | 0          |
| <i>MRPL37</i>   | Adrenal | 2.71E-10   | -0.00074  | 2.78E-08 | decreasing     | 0          |
| <i>MRPS18A</i>  | Adrenal | 4.10E-08   | -0.00074  | 5.71E-08 | decreasing     | 0          |
| <i>MRPS2</i>    | Adrenal | 2.95E-08   | -0.00076  | 1.10E-08 | decreasing     | 0          |
| <i>MRPS22</i>   | Adrenal | 9.35E-11   | -0.00077  | 2.74E-09 | decreasing     | 0          |
| <i>MRPS7</i>    | Adrenal | 1.14E-11   | -0.00081  | 4.36E-10 | decreasing     | 0          |
| <i>MRRF</i>     | Adrenal | 1.15E-09   | -0.00073  | 8.41E-08 | decreasing     | 0          |
| <i>MTCH2</i>    | Adrenal | 1.89E-09   | -0.00066  | 2.10E-06 | decreasing     | 0          |
| <i>MTPAP</i>    | Adrenal | 6.24E-11   | -0.00055  | 0.000119 | other          | 1          |
| <i>MYB</i>      | Adrenal | 9.97E-08   | -0.00063  | 3.50E-06 | decreasing     | 0          |
| <i>MYBL2</i>    | Adrenal | 4.00E-10   | -0.00076  | 5.85E-09 | decreasing     | 0          |
| <i>MYO16</i>    | Adrenal | 1.39E-07   | -0.00067  | 6.28E-07 | decreasing     | 0          |
| <i>MYO18A</i>   | Adrenal | 2.03E-10   | 0.000395  | 0.006459 | other          | 0          |
| <i>MYO6</i>     | Adrenal | 9.93E-08   | 0.000679  | 7.42E-07 | increasing     | 0          |
| <i>MYRIP</i>    | Adrenal | 6.03E-08   | 0.000679  | 8.75E-07 | increasing     | 1          |
| <i>NALCN</i>    | Adrenal | 5.03E-09   | 0.000592  | 1.18E-05 | increasing     | 0          |
| <i>NAP1L2</i>   | Adrenal | 2.59E-09   | 0.000704  | 1.56E-07 | increasing     | 0          |
| <i>NCAPG</i>    | Adrenal | 1.21E-07   | -0.00069  | 4.44E-07 | decreasing     | 0          |
| <i>NCAPH</i>    | Adrenal | 7.73E-11   | -0.00078  | 1.66E-09 | decreasing     | 0          |
| <i>NCK2</i>     | Adrenal | 5.36E-08   | -0.00047  | 0.000955 | other          | 0          |
| <i>NCMAP</i>    | Adrenal | 1.45E-07   | -0.00054  | 9.33E-05 | decreasing     | 0          |
| <i>NDC80</i>    | Adrenal | 4.40E-09   | -0.00068  | 6.50E-07 | decreasing     | 0          |
| <i>NDUFA10</i>  | Adrenal | 7.97E-12   | -0.0008   | 5.78E-10 | decreasing     | 0          |
| <i>NDUFA9</i>   | Adrenal | 1.01E-09   | -0.00065  | 3.11E-06 | decreasing     | 0          |
| <i>NDUFS2</i>   | Adrenal | 6.81E-08   | -0.00068  | 7.41E-07 | decreasing     | 0          |
| <i>NDUFS3</i>   | Adrenal | 5.42E-07   | -0.00072  | 1.56E-07 | decreasing     | 0          |
| <i>NEFH</i>     | Adrenal | 1.35E-07   | -2.37E-05 | 0.873135 | other          | 0          |
| <i>NEK1</i>     | Adrenal | 2.05E-07   | 0.000621  | 4.86E-06 | increasing     | 0          |
| <i>NEK2</i>     | Adrenal | 8.90E-12   | -0.00081  | 1.61E-10 | decreasing     | 0          |
| <i>NEO1</i>     | Adrenal | 1.39E-08   | 0.000599  | 1.57E-05 | increasing     | 0          |
| <i>NEU3</i>     | Adrenal | 1.91E-07   | 0.000718  | 1.45E-07 | increasing     | 0          |
| <i>NEURL3</i>   | Adrenal | 6.39E-08   | -0.0004   | 0.001492 | other          | 0          |
| <i>NFS1</i>     | Adrenal | 5.12E-12   | -0.00073  | 3.76E-08 | decreasing     | 0          |
| <i>NID1</i>     | Adrenal | 8.48E-08   | -0.00062  | 4.00E-06 | decreasing     | 0          |
| <i>NIPSNAP1</i> | Adrenal | 4.34E-08   | -0.00077  | 5.78E-09 | decreasing     | 0          |
| <i>NLRX1</i>    | Adrenal | 9.66E-10   | -0.00069  | 3.04E-07 | decreasing     | 0          |
| <i>NOP16</i>    | Adrenal | 2.73E-09   | -0.00074  | 3.22E-08 | decreasing     | 0          |
| <i>NOP9</i>     | Adrenal | 6.13E-08   | 0.00025   | 0.084069 | other          | 0          |
| <i>NOTCH3</i>   | Adrenal | 2.46E-08   | 0.000123  | 0.420028 | other          | 0          |
| <i>NPAP1</i>    | Adrenal | 2.99E-08   | 0.000739  | 3.63E-08 | increasing     | 0          |

**Supplementary Table 9. Genes with a significant age effect from either ANOVA or linear regression. Beta is the regression coefficient, Pval is the p-value for the regression coefficient of expression on age (in days). Effect category is increasing if beta is positive and significant, decreasing if beta is negative and significant, and other if the ANOVA were significant rather than the linear regression. Local eQTL is 1 if the gene had a significant local eQTL**

| Gene           | Tissue  | Anova.pval | Beta      | Pval     | EffectCategory | Local eQTL |
|----------------|---------|------------|-----------|----------|----------------|------------|
| <i>NPC1L1</i>  | Adrenal | 2.29E-07   | 0.000501  | 0.000373 | other          | 0          |
| <i>NPFFR2</i>  | Adrenal | 2.34E-05   | 0.000705  | 1.10E-07 | increasing     | 1          |
| <i>NPNT</i>    | Adrenal | 1.36E-08   | -0.00029  | 0.054288 | other          | 0          |
| <i>NPR2</i>    | Adrenal | 1.92E-07   | 5.04E-05  | 0.731286 | other          | 0          |
| <i>NR2E3</i>   | Adrenal | 9.89E-08   | -0.00074  | 4.17E-08 | decreasing     | 0          |
| <i>NR3C2</i>   | Adrenal | 1.43E-13   | 0.000781  | 1.08E-09 | increasing     | 0          |
| <i>NRAS</i>    | Adrenal | 9.19E-08   | -0.00014  | 0.340664 | other          | 0          |
| <i>NRBP1</i>   | Adrenal | 8.91E-10   | -0.00077  | 3.03E-09 | decreasing     | 0          |
| <i>NRBP2</i>   | Adrenal | 1.56E-08   | 0.000614  | 4.84E-06 | increasing     | 1          |
| <i>NRCAM</i>   | Adrenal | 1.13E-08   | 0.000715  | 9.34E-08 | increasing     | 0          |
| <i>NREP</i>    | Adrenal | 2.08E-07   | -0.00013  | 0.366821 | other          | 0          |
| <i>NRM</i>     | Adrenal | 5.20E-08   | -0.00068  | 1.11E-06 | decreasing     | 0          |
| <i>NRP1</i>    | Adrenal | 1.22E-07   | -0.00045  | 0.001453 | other          | 0          |
| <i>NRTN</i>    | Adrenal | 1.60E-07   | -0.00056  | 4.66E-05 | decreasing     | 0          |
| <i>NT5C3A</i>  | Adrenal | 9.06E-09   | -1.42E-05 | 0.92495  | other          | 0          |
| <i>NUCB2</i>   | Adrenal | 8.18E-08   | 0.000678  | 6.54E-07 | increasing     | 0          |
| <i>NUP85</i>   | Adrenal | 6.56E-08   | -0.00071  | 2.51E-07 | decreasing     | 0          |
| <i>NUSAP1</i>  | Adrenal | 2.59E-10   | -0.00074  | 1.79E-08 | decreasing     | 0          |
| <i>NUTF2</i>   | Adrenal | 1.55E-07   | -0.00043  | 0.003174 | other          | 0          |
| <i>NXN</i>     | Adrenal | 2.77E-09   | -0.00078  | 4.17E-09 | decreasing     | 1          |
| <i>NXPH1</i>   | Adrenal | 1.68E-07   | 0.000509  | 0.000316 | other          | 0          |
| <i>OGDHL</i>   | Adrenal | 4.53E-08   | 0.000433  | 0.002721 | other          | 0          |
| <i>OPLAH</i>   | Adrenal | 2.92E-09   | 0.000398  | 0.005631 | other          | 0          |
| <i>OPN15W</i>  | Adrenal | 1.05E-07   | -0.00022  | 0.138939 | other          | 0          |
| <i>OSBPL10</i> | Adrenal | 4.34E-08   | -0.0005   | 0.00049  | other          | 0          |
| <i>OSBPL2</i>  | Adrenal | 3.72E-09   | 0.000412  | 0.005109 | other          | 0          |
| <i>OSTF1</i>   | Adrenal | 2.32E-09   | -0.00073  | 4.99E-08 | decreasing     | 0          |
| <i>OTOL1</i>   | Adrenal | 4.12E-11   | -0.00014  | 0.128125 | other          | 0          |
| <i>OTUD3</i>   | Adrenal | 2.13E-07   | 0.000584  | 2.77E-05 | increasing     | 0          |
| <i>PABPC3</i>  | Adrenal | 6.45E-08   | -8.96E-05 | 0.548788 | other          | 0          |
| <i>PAN2</i>    | Adrenal | 3.51E-08   | 0.000428  | 0.003664 | other          | 0          |
| <i>PAPSS2</i>  | Adrenal | 9.44E-09   | 0.00047   | 0.000987 | other          | 0          |
| <i>PAQR4</i>   | Adrenal | 2.64E-10   | -0.00078  | 2.26E-09 | decreasing     | 0          |
| <i>PBK</i>     | Adrenal | 1.18E-08   | -0.00074  | 2.24E-08 | decreasing     | 0          |
| <i>PBX3</i>    | Adrenal | 1.58E-09   | 0.000645  | 2.31E-06 | increasing     | 0          |
| <i>PCDHB7</i>  | Adrenal | 1.19E-08   | 0.000706  | 1.04E-07 | increasing     | 0          |
| <i>PDE2A</i>   | Adrenal | 2.08E-07   | -0.00014  | 0.340239 | other          | 0          |
| <i>PDGFRL</i>  | Adrenal | 1.87E-09   | -0.00067  | 1.72E-06 | decreasing     | 0          |
| <i>PDHB</i>    | Adrenal | 1.52E-11   | -0.00079  | 1.07E-09 | decreasing     | 0          |
| <i>PDHX</i>    | Adrenal | 1.55E-08   | -0.0007   | 1.30E-07 | decreasing     | 0          |

**Supplementary Table 9. Genes with a significant age effect from either ANOVA or linear regression. Beta is the regression coefficient, Pval is the p-value for the regression coefficient of expression on age (in days). Effect category is increasing if beta is positive and significant, decreasing if beta is negative and significant, and other if the ANOVA were significant rather than the linear regression. Local eQTL is 1 if the gene had a significant local eQTL**

| Gene            | Tissue  | Anova.pval | Beta      | Pval     | EffectCategory | Local eQTL |
|-----------------|---------|------------|-----------|----------|----------------|------------|
| <i>PDIA2</i>    | Adrenal | 2.44E-09   | 0.000527  | 0.000196 | other          | 0          |
| <i>PEX13</i>    | Adrenal | 1.04E-08   | -0.00039  | 0.008211 | other          | 0          |
| <i>PFDN1</i>    | Adrenal | 2.20E-07   | -0.00055  | 0.000126 | other          | 0          |
| <i>PHB2</i>     | Adrenal | 3.29E-06   | -0.00073  | 6.39E-08 | decreasing     | 0          |
| <i>PHF2</i>     | Adrenal | 1.55E-07   | 0.000268  | 0.068718 | other          | 0          |
| <i>PI15</i>     | Adrenal | 4.54E-10   | -0.00068  | 7.08E-07 | decreasing     | 0          |
| <i>PI16</i>     | Adrenal | 5.51E-09   | -0.00077  | 9.17E-09 | decreasing     | 0          |
| <i>PIGU</i>     | Adrenal | 1.48E-08   | -0.00072  | 2.79E-08 | decreasing     | 0          |
| <i>PIP4K2B</i>  | Adrenal | 2.01E-08   | -9.33E-05 | 0.536545 | other          | 0          |
| <i>PITPNC1</i>  | Adrenal | 1.11E-07   | -0.00058  | 2.18E-05 | decreasing     | 0          |
| <i>PKIB</i>     | Adrenal | 1.09E-12   | -0.00073  | 5.93E-08 | decreasing     | 0          |
| <i>PKMYT1</i>   | Adrenal | 7.65E-08   | -0.00075  | 1.50E-08 | decreasing     | 0          |
| <i>PKP2</i>     | Adrenal | 2.59E-09   | 0.000678  | 5.60E-07 | increasing     | 0          |
| <i>PLBD2</i>    | Adrenal | 2.35E-07   | 0.000508  | 0.000434 | other          | 1          |
| <i>PLCL2</i>    | Adrenal | 2.07E-09   | -0.00042  | 0.003181 | other          | 0          |
| <i>PLEKHH1</i>  | Adrenal | 3.26E-08   | 0.000342  | 0.018263 | other          | 0          |
| <i>PLP2</i>     | Adrenal | 2.55E-13   | -0.00078  | 1.51E-09 | decreasing     | 0          |
| <i>PNMA1</i>    | Adrenal | 5.99E-09   | 7.61E-05  | 0.603795 | other          | 0          |
| <i>POC1B</i>    | Adrenal | 1.88E-08   | -0.00046  | 0.001944 | other          | 1          |
| <i>POGLUT1</i>  | Adrenal | 6.57E-08   | 0.000168  | 0.261756 | other          | 0          |
| <i>POLG</i>     | Adrenal | 1.47E-07   | -0.00069  | 5.41E-07 | decreasing     | 0          |
| <i>POMGNT2</i>  | Adrenal | 3.20E-08   | -9.72E-05 | 0.512312 | other          | 0          |
| <i>POSTN</i>    | Adrenal | 3.50E-08   | -0.00057  | 4.39E-05 | decreasing     | 0          |
| <i>POU6F1</i>   | Adrenal | 2.72E-09   | 0.000469  | 0.001152 | other          | 0          |
| <i>PPAP2A</i>   | Adrenal | 6.20E-10   | -0.00071  | 2.61E-07 | decreasing     | 0          |
| <i>PPIP5K2</i>  | Adrenal | 2.04E-08   | 0.000311  | 0.030512 | other          | 0          |
| <i>PPM1B</i>    | Adrenal | 9.12E-12   | 0.000845  | 4.84E-11 | increasing     | 0          |
| <i>PPP1R14B</i> | Adrenal | 7.37E-08   | -0.0007   | 2.59E-07 | decreasing     | 0          |
| <i>PPP2R5E</i>  | Adrenal | 5.62E-09   | 0.000648  | 2.07E-06 | increasing     | 0          |
| <i>PPP4C</i>    | Adrenal | 1.44E-08   | -0.00077  | 3.46E-09 | decreasing     | 0          |
| <i>PRC1</i>     | Adrenal | 2.18E-09   | -0.00071  | 5.64E-08 | decreasing     | 0          |
| <i>PRKAA2</i>   | Adrenal | 5.64E-09   | 0.000629  | 4.74E-06 | increasing     | 0          |
| <i>PRKCA</i>    | Adrenal | 9.39E-08   | 0.000639  | 3.65E-06 | increasing     | 0          |
| <i>PRLR</i>     | Adrenal | 2.40E-13   | 0.000832  | 2.14E-11 | increasing     | 0          |
| <i>PRPS2</i>    | Adrenal | 4.47E-08   | 0.000442  | 0.001697 | other          | 0          |
| <i>PRPSAP1</i>  | Adrenal | 6.35E-06   | -0.00071  | 2.56E-07 | decreasing     | 0          |
| <i>PRR16</i>    | Adrenal | 3.78E-07   | 0.000703  | 1.40E-07 | increasing     | 0          |
| <i>PRSS23</i>   | Adrenal | 7.19E-08   | -0.00061  | 9.17E-06 | decreasing     | 0          |
| <i>PRUNE2</i>   | Adrenal | 5.18E-07   | 0.000742  | 2.85E-08 | increasing     | 0          |
| <i>PSKH1</i>    | Adrenal | 1.88E-06   | -0.0007   | 2.35E-07 | decreasing     | 0          |



**Supplementary Table 9. Genes with a significant age effect from either ANOVA or linear regression. Beta is the regression coefficient, Pval is the p-value for the regression coefficient of expression on age (in days). Effect category is increasing if beta is positive and significant, decreasing if beta is negative and significant, and other if the ANOVA were significant rather than the linear regression. Local eQTL is 1 if the gene had a significant local eQTL**

| Gene           | Tissue  | Anova.pval | Beta     | Pval     | EffectCategory | Local eQTL |
|----------------|---------|------------|----------|----------|----------------|------------|
| <i>PSMA2</i>   | Adrenal | 1.24E-07   | -0.0004  | 0.006226 | other          | 0          |
| <i>PXDN</i>    | Adrenal | 2.61E-09   | -0.00076 | 3.71E-09 | decreasing     | 0          |
| <i>PYROXD2</i> | Adrenal | 1.83E-07   | 0.000415 | 0.004497 | other          | 0          |
| <i>QPCT</i>    | Adrenal | 7.32E-08   | -0.00065 | 1.91E-06 | decreasing     | 0          |
| <i>RAC1</i>    | Adrenal | 1.11E-08   | -0.00031 | 0.036275 | other          | 0          |
| <i>RACGAP1</i> | Adrenal | 3.27E-09   | -0.00073 | 4.05E-08 | decreasing     | 1          |
| <i>RANBP1</i>  | Adrenal | 2.56E-07   | -0.00064 | 3.05E-06 | decreasing     | 0          |
| <i>RASL10B</i> | Adrenal | 2.39E-11   | -0.00078 | 1.93E-09 | decreasing     | 0          |
| <i>RBM19</i>   | Adrenal | 1.83E-13   | -0.00079 | 7.24E-10 | decreasing     | 1          |
| <i>RBM38</i>   | Adrenal | 1.98E-09   | -0.0007  | 1.81E-07 | decreasing     | 0          |
| <i>RBPM52</i>  | Adrenal | 4.66E-10   | -0.00075 | 2.15E-08 | decreasing     | 0          |
| <i>REXO2</i>   | Adrenal | 8.45E-11   | -0.00072 | 2.04E-08 | decreasing     | 0          |
| <i>RGMA</i>    | Adrenal | 3.30E-08   | -0.00055 | 0.000126 | other          | 0          |
| <i>RGP1</i>    | Adrenal | 4.48E-14   | 0.000446 | 0.00204  | other          | 0          |
| <i>RHBG</i>    | Adrenal | 3.45E-08   | 0.000163 | 0.251851 | other          | 0          |
| <i>RHOA</i>    | Adrenal | 8.43E-08   | -0.00045 | 0.001859 | other          | 0          |
| <i>RIMS4</i>   | Adrenal | 2.25E-09   | 0.000629 | 5.15E-06 | increasing     | 0          |
| <i>RMI2</i>    | Adrenal | 2.82E-09   | -0.0005  | 0.00053  | other          | 0          |
| <i>RNF130</i>  | Adrenal | 4.12E-07   | -0.00073 | 1.02E-07 | decreasing     | 0          |
| <i>ROBO2</i>   | Adrenal | 4.51E-09   | -0.00072 | 6.08E-08 | decreasing     | 0          |
| <i>RORC</i>    | Adrenal | 2.42E-08   | 0.000668 | 1.34E-06 | increasing     | 0          |
| <i>RPF1</i>    | Adrenal | 7.69E-09   | -0.00036 | 0.016546 | other          | 0          |
| <i>RPL22L1</i> | Adrenal | 2.17E-10   | -0.00075 | 1.19E-08 | decreasing     | 0          |
| <i>RPS6KA1</i> | Adrenal | 2.17E-05   | -0.00072 | 1.28E-07 | decreasing     | 0          |
| <i>RQCD1</i>   | Adrenal | 2.45E-08   | -0.00047 | 0.001244 | other          | 0          |
| <i>RRM2</i>    | Adrenal | 5.58E-08   | -0.00076 | 9.15E-09 | decreasing     | 0          |
| <i>RSPO3</i>   | Adrenal | 8.72E-09   | -0.00035 | 0.015917 | other          | 0          |
| <i>RSRP1</i>   | Adrenal | 3.59E-09   | 0.000514 | 0.000314 | other          | 0          |
| <i>RTN1</i>    | Adrenal | 1.37E-09   | 0.000652 | 8.48E-07 | increasing     | 0          |
| <i>RUSC2</i>   | Adrenal | 2.50E-07   | 0.000358 | 0.012267 | other          | 0          |
| <i>SAFB2</i>   | Adrenal | 8.62E-09   | 0.000368 | 0.010793 | other          | 0          |
| <i>SAMD12</i>  | Adrenal | 9.83E-10   | 0.000748 | 8.96E-09 | increasing     | 0          |
| <i>SARM1</i>   | Adrenal | 5.56E-08   | 0.000216 | 0.136639 | other          | 0          |
| <i>SASH1</i>   | Adrenal | 4.43E-08   | 0.000778 | 2.83E-09 | increasing     | 0          |
| <i>SATB1</i>   | Adrenal | 1.52E-08   | 0.000715 | 6.24E-08 | increasing     | 0          |
| <i>SC5D</i>    | Adrenal | 1.06E-09   | 0.000588 | 3.74E-05 | increasing     | 0          |
| <i>SCAMP5</i>  | Adrenal | 7.19E-09   | 0.000582 | 2.38E-05 | increasing     | 0          |
| <i>SCML1</i>   | Adrenal | 2.56E-07   | 0.000273 | 0.062503 | other          | 0          |
| <i>SCN8A</i>   | Adrenal | 1.41E-09   | 0.000261 | 0.078061 | other          | 0          |
| <i>SDC2</i>    | Adrenal | 2.80E-11   | 0.000384 | 0.006936 | other          | 0          |

**Supplementary Table 9. Genes with a significant age effect from either ANOVA or linear regression. Beta is the regression coefficient, Pval is the p-value for the regression coefficient of expression on age (in days). Effect category is increasing if beta is positive and significant, decreasing if beta is negative and significant, and other if the ANOVA were significant rather than the linear regression. Local eQTL is 1 if the gene had a significant local eQTL**

| Gene            | Tissue  | Anova.pval | Beta     | Pval     | EffectCategory | Local eQTL |
|-----------------|---------|------------|----------|----------|----------------|------------|
| <i>SDHAF2</i>   | Adrenal | 4.56E-08   | -0.00065 | 3.40E-06 | decreasing     | 0          |
| <i>SEC31B</i>   | Adrenal | 4.45E-11   | 0.00029  | 0.050911 | other          | 0          |
| <i>SERBP1</i>   | Adrenal | 1.62E-07   | -0.00057 | 2.95E-05 | decreasing     | 0          |
| <i>SERPIND1</i> | Adrenal | 9.87E-08   | 9.01E-05 | 0.543592 | other          | 0          |
| <i>SET</i>      | Adrenal | 2.66E-08   | -0.00032 | 0.034432 | other          | 0          |
| <i>SFRP4</i>    | Adrenal | 8.20E-08   | 0.000474 | 0.000817 | other          | 0          |
| <i>SGOL1</i>    | Adrenal | 5.32E-07   | -0.00071 | 1.91E-07 | decreasing     | 0          |
| <i>SGSM1</i>    | Adrenal | 8.22E-10   | 0.000664 | 1.48E-06 | increasing     | 1          |
| <i>SHANK1</i>   | Adrenal | 1.84E-10   | 0.000634 | 4.15E-06 | increasing     | 0          |
| <i>SHC2</i>     | Adrenal | 5.87E-09   | 0.000252 | 0.09309  | other          | 0          |
| <i>SHC3</i>     | Adrenal | 4.99E-08   | 0.000162 | 0.271969 | other          | 0          |
| <i>SHISA8</i>   | Adrenal | 2.66E-09   | -0.00075 | 1.50E-08 | decreasing     | 0          |
| <i>SIAE</i>     | Adrenal | 1.47E-07   | 0.000518 | 0.000244 | other          | 0          |
| <i>SIDT1</i>    | Adrenal | 7.95E-09   | 0.000612 | 9.39E-06 | increasing     | 0          |
| <i>SLAMF9</i>   | Adrenal | 2.90E-09   | -0.00081 | 3.83E-10 | decreasing     | 0          |
| <i>SLC12A5</i>  | Adrenal | 1.30E-07   | 0.000461 | 0.00152  | other          | 0          |
| <i>SLC22A15</i> | Adrenal | 1.28E-07   | 0.000683 | 7.55E-07 | increasing     | 0          |
| <i>SLC24A3</i>  | Adrenal | 4.95E-08   | -0.00071 | 2.13E-07 | decreasing     | 0          |
| <i>SLC25A20</i> | Adrenal | 8.87E-12   | -0.00082 | 1.82E-10 | decreasing     | 0          |
| <i>SLC25A29</i> | Adrenal | 3.90E-10   | 0.000656 | 1.43E-06 | increasing     | 0          |
| <i>SLC2A4</i>   | Adrenal | 1.71E-05   | -0.00071 | 2.16E-07 | decreasing     | 0          |
| <i>SLC4A1</i>   | Adrenal | 1.67E-07   | -0.00065 | 2.07E-06 | decreasing     | 0          |
| <i>SLC4A11</i>  | Adrenal | 1.38E-07   | 0.000281 | 0.051586 | other          | 0          |
| <i>SLC6A16</i>  | Adrenal | 2.22E-08   | 0.000242 | 0.099632 | other          | 1          |
| <i>SMARCAL1</i> | Adrenal | 1.25E-08   | -0.00073 | 1.60E-08 | decreasing     | 0          |
| <i>SMARCC2</i>  | Adrenal | 4.49E-10   | 0.00061  | 1.36E-05 | increasing     | 0          |
| <i>SMARCD3</i>  | Adrenal | 1.13E-06   | -0.00075 | 1.60E-08 | decreasing     | 0          |
| <i>SMIM14</i>   | Adrenal | 6.95E-08   | 0.000571 | 6.01E-05 | increasing     | 0          |
| <i>SMTNL2</i>   | Adrenal | 4.48E-10   | -0.00071 | 1.30E-07 | decreasing     | 0          |
| <i>SMUG1</i>    | Adrenal | 7.63E-08   | -0.00062 | 6.54E-06 | decreasing     | 0          |
| <i>SNRPC</i>    | Adrenal | 3.02E-09   | -0.00068 | 6.94E-07 | decreasing     | 0          |
| <i>SNRPD3</i>   | Adrenal | 3.17E-08   | -0.00065 | 3.05E-06 | decreasing     | 0          |
| <i>SNX32</i>    | Adrenal | 9.61E-08   | 9.09E-05 | 0.542958 | other          | 0          |
| <i>SOWAHB</i>   | Adrenal | 1.19E-07   | -0.00075 | 7.85E-09 | decreasing     | 0          |
| <i>SOX11</i>    | Adrenal | 6.88E-11   | -0.00074 | 1.80E-08 | decreasing     | 0          |
| <i>SOX21</i>    | Adrenal | 1.74E-10   | 0.000785 | 4.02E-10 | increasing     | 0          |
| <i>SP4</i>      | Adrenal | 2.46E-08   | 0.000705 | 1.98E-07 | increasing     | 0          |
| <i>SPAG7</i>    | Adrenal | 4.42E-09   | -0.0007  | 2.15E-07 | decreasing     | 0          |
| <i>SPARC</i>    | Adrenal | 8.98E-17   | -0.00088 | 3.97E-13 | decreasing     | 0          |
| <i>SPATA1</i>   | Adrenal | 6.39E-08   | -0.00065 | 2.20E-06 | decreasing     | 0          |

**Supplementary Table 9. Genes with a significant age effect from either ANOVA or linear regression. Beta is the regression coefficient, Pval is the p-value for the regression coefficient of expression on age (in days). Effect category is increasing if beta is positive and significant, decreasing if beta is negative and significant, and other if the ANOVA were significant rather than the linear regression. Local eQTL is 1 if the gene had a significant local eQTL**

| Gene            | Tissue  | Anova.pval | Beta     | Pval     | EffectCategory | Local eQTL |
|-----------------|---------|------------|----------|----------|----------------|------------|
| <i>SPEF2</i>    | Adrenal | 2.61E-08   | 0.000781 | 3.68E-09 | increasing     | 0          |
| <i>SPRED3</i>   | Adrenal | 2.61E-07   | 0.000604 | 1.78E-05 | increasing     | 0          |
| <i>SPTBN2</i>   | Adrenal | 3.37E-12   | 0.000556 | 6.94E-05 | increasing     | 0          |
| <i>SPTBN4</i>   | Adrenal | 1.96E-10   | 0.000647 | 2.17E-06 | increasing     | 0          |
| <i>SRCIN1</i>   | Adrenal | 3.59E-09   | 0.00011  | 0.451438 | other          | 0          |
| <i>SRPK2</i>    | Adrenal | 2.66E-06   | 0.000713 | 1.93E-07 | increasing     | 0          |
| <i>SRRM2</i>    | Adrenal | 1.53E-10   | 0.00039  | 0.008541 | other          | 0          |
| <i>SRSF5</i>    | Adrenal | 2.29E-08   | 0.000286 | 0.051657 | other          | 0          |
| <i>ST8SIA5</i>  | Adrenal | 1.68E-09   | -0.00068 | 6.79E-07 | decreasing     | 0          |
| <i>STARD4</i>   | Adrenal | 8.76E-09   | 0.000478 | 0.000995 | other          | 0          |
| <i>STAT5B</i>   | Adrenal | 7.27E-08   | 0.00038  | 0.009514 | other          | 0          |
| <i>STK24</i>    | Adrenal | 2.28E-11   | -0.00045 | 0.001372 | other          | 0          |
| <i>STK31</i>    | Adrenal | 4.14E-09   | 0.000652 | 1.52E-06 | increasing     | 1          |
| <i>STRADA</i>   | Adrenal | 1.28E-07   | -0.00068 | 5.57E-07 | decreasing     | 0          |
| <i>STX1B</i>    | Adrenal | 1.08E-11   | 0.000691 | 3.97E-07 | increasing     | 0          |
| <i>SUCLA2</i>   | Adrenal | 1.01E-07   | -0.00064 | 3.90E-06 | decreasing     | 0          |
| <i>SUGP2</i>    | Adrenal | 1.90E-09   | 0.000179 | 0.234527 | other          | 0          |
| <i>SUN1</i>     | Adrenal | 1.77E-08   | 0.000373 | 0.011964 | other          | 0          |
| <i>SUPV3L1</i>  | Adrenal | 4.75E-09   | -0.00061 | 1.25E-05 | decreasing     | 0          |
| <i>SYN2</i>     | Adrenal | 5.88E-09   | 0.000549 | 6.07E-05 | increasing     | 0          |
| <i>SYN3</i>     | Adrenal | 3.10E-08   | 0.000499 | 0.00056  | other          | 0          |
| <i>SYT9</i>     | Adrenal | 1.31E-08   | 0.000562 | 6.15E-05 | increasing     | 0          |
| <i>SZT2</i>     | Adrenal | 9.08E-09   | 0.000321 | 0.030608 | other          | 0          |
| <i>TACC2</i>    | Adrenal | 1.33E-07   | 0.000353 | 0.014889 | other          | 0          |
| <i>TACC3</i>    | Adrenal | 5.92E-12   | -0.00085 | 2.66E-11 | decreasing     | 0          |
| <i>TAF9B</i>    | Adrenal | 1.19E-07   | 0.000706 | 1.56E-07 | increasing     | 0          |
| <i>TBC1D22A</i> | Adrenal | 3.21E-07   | -0.00073 | 3.86E-08 | decreasing     | 0          |
| <i>TECRL</i>    | Adrenal | 1.68E-19   | -0.00034 | 0.000808 | other          | 0          |
| <i>TEFM</i>     | Adrenal | 7.09E-10   | -0.00067 | 9.70E-07 | decreasing     | 0          |
| <i>TEP1</i>     | Adrenal | 1.42E-11   | 0.000425 | 0.003349 | other          | 0          |
| <i>TFG</i>      | Adrenal | 9.34E-08   | -0.00038 | 0.010134 | other          | 0          |
| <i>TGM3</i>     | Adrenal | 4.03E-07   | -0.00071 | 1.58E-07 | decreasing     | 1          |
| <i>TIAF1</i>    | Adrenal | 2.00E-12   | 0.000413 | 0.003523 | other          | 0          |
| <i>TICRR</i>    | Adrenal | 1.35E-07   | -0.00057 | 5.50E-05 | decreasing     | 0          |
| <i>TIFA</i>     | Adrenal | 4.43E-08   | -0.00065 | 9.89E-07 | decreasing     | 0          |
| <i>TIMM17B</i>  | Adrenal | 1.33E-07   | -0.00072 | 5.60E-08 | decreasing     | 0          |
| <i>TIMM50</i>   | Adrenal | 2.93E-06   | -0.00075 | 2.22E-08 | decreasing     | 0          |
| <i>TIMM8B</i>   | Adrenal | 7.49E-09   | -0.00061 | 9.33E-06 | decreasing     | 0          |
| <i>TK1</i>      | Adrenal | 4.58E-10   | -0.00074 | 2.99E-08 | decreasing     | 0          |
| <i>TKT</i>      | Adrenal | 7.18E-09   | -0.00064 | 5.70E-06 | decreasing     | 0          |

**Supplementary Table 9. Genes with a significant age effect from either ANOVA or linear regression. Beta is the regression coefficient, Pval is the p-value for the regression coefficient of expression on age (in days). Effect category is increasing if beta is positive and significant, decreasing if beta is negative and significant, and other if the ANOVA were significant rather than the linear regression. Local eQTL is 1 if the gene had a significant local eQTL**

| Gene             | Tissue  | Anova.pval | Beta     | Pval     | EffectCategory | Local eQTL |
|------------------|---------|------------|----------|----------|----------------|------------|
| <i>TMEM117</i>   | Adrenal | 1.12E-07   | -0.00055 | 6.89E-05 | decreasing     | 0          |
| <i>TMEM132E</i>  | Adrenal | 2.82E-10   | -0.00077 | 5.57E-09 | decreasing     | 0          |
| <i>TMEM179</i>   | Adrenal | 7.69E-09   | 0.000582 | 3.55E-05 | increasing     | 0          |
| <i>TMEM189</i>   | Adrenal | 4.77E-10   | -0.00072 | 1.00E-07 | decreasing     | 0          |
| <i>TMEM246</i>   | Adrenal | 4.68E-09   | 0.000666 | 8.84E-07 | increasing     | 0          |
| <i>TMEM51</i>    | Adrenal | 1.72E-07   | -0.00064 | 3.41E-06 | decreasing     | 1          |
| <i>TMEM86B</i>   | Adrenal | 2.50E-08   | 0.000368 | 0.013536 | other          | 0          |
| <i>TMOD1</i>     | Adrenal | 8.76E-12   | 0.000734 | 2.09E-08 | increasing     | 0          |
| <i>TNFRSF10B</i> | Adrenal | 1.70E-07   | 0.000519 | 0.00025  | other          | 0          |
| <i>TNFSF10</i>   | Adrenal | 7.40E-08   | 7.00E-05 | 0.639389 | other          | 0          |
| <i>TNK2</i>      | Adrenal | 1.97E-09   | 0.000488 | 0.000457 | other          | 0          |
| <i>TNNI1</i>     | Adrenal | 2.76E-06   | -0.00071 | 1.95E-07 | decreasing     | 1          |
| <i>TNRC6C</i>    | Adrenal | 5.79E-10   | 0.000751 | 1.68E-08 | increasing     | 0          |
| <i>TOP2A</i>     | Adrenal | 7.55E-12   | -0.00081 | 2.14E-10 | decreasing     | 0          |
| <i>TPM2</i>      | Adrenal | 4.59E-06   | -0.00074 | 3.76E-08 | decreasing     | 1          |
| <i>TPX2</i>      | Adrenal | 1.37E-15   | -0.00085 | 9.19E-12 | decreasing     | 0          |
| <i>TRIM3</i>     | Adrenal | 2.20E-07   | 0.000612 | 5.15E-06 | increasing     | 0          |
| <i>TRIM72</i>    | Adrenal | 2.77E-08   | 0.000174 | 0.24335  | other          | 0          |
| <i>TROAP</i>     | Adrenal | 2.97E-08   | -0.00074 | 3.46E-08 | decreasing     | 0          |
| <i>TRPC1</i>     | Adrenal | 6.82E-09   | 0.000727 | 6.80E-08 | increasing     | 0          |
| <i>TRPC4</i>     | Adrenal | 6.14E-08   | -0.00019 | 0.196869 | other          | 0          |
| <i>TRUB2</i>     | Adrenal | 1.92E-08   | -0.00072 | 7.77E-08 | decreasing     | 0          |
| <i>TSNARE1</i>   | Adrenal | 2.18E-10   | 0.000351 | 0.016891 | other          | 0          |
| <i>TSPAN13</i>   | Adrenal | 3.56E-08   | -0.00061 | 4.84E-06 | decreasing     | 0          |
| <i>TSPAN9</i>    | Adrenal | 7.21E-07   | -0.00069 | 2.53E-07 | decreasing     | 0          |
| <i>TSPYL2</i>    | Adrenal | 5.80E-08   | 0.000443 | 0.00188  | other          | 0          |
| <i>TSPYL4</i>    | Adrenal | 2.43E-07   | 0.000528 | 0.000268 | other          | 0          |
| <i>TSTA3</i>     | Adrenal | 1.91E-08   | -0.00075 | 1.03E-08 | decreasing     | 0          |
| <i>TTC21A</i>    | Adrenal | 1.24E-07   | 0.000426 | 0.003982 | other          | 0          |
| <i>TTC22</i>     | Adrenal | 1.21E-09   | 0.000761 | 6.13E-09 | increasing     | 0          |
| <i>TTK</i>       | Adrenal | 1.97E-10   | -0.00078 | 1.28E-09 | decreasing     | 0          |
| <i>TTPAL</i>     | Adrenal | 2.26E-07   | 0.000632 | 6.19E-06 | increasing     | 0          |
| <i>TUFT1</i>     | Adrenal | 1.11E-07   | 0.000514 | 0.000271 | other          | 0          |
| <i>TXNL1</i>     | Adrenal | 1.98E-08   | -0.00046 | 0.001404 | other          | 0          |
| <i>TYMS</i>      | Adrenal | 4.87E-10   | -0.00068 | 5.51E-07 | decreasing     | 0          |
| <i>UBE2C</i>     | Adrenal | 1.47E-08   | -0.00074 | 4.18E-08 | decreasing     | 0          |
| <i>UBE2G1</i>    | Adrenal | 1.49E-07   | -0.00038 | 0.008516 | other          | 0          |
| <i>UBE2L3</i>    | Adrenal | 2.96E-08   | -0.00052 | 0.000313 | other          | 0          |
| <i>UBE2M</i>     | Adrenal | 1.12E-07   | -0.0005  | 0.000616 | other          | 0          |
| <i>UBE2R2</i>    | Adrenal | 9.78E-08   | 1.41E-05 | 0.924404 | other          | 0          |

**Supplementary Table 9. Genes with a significant age effect from either ANOVA or linear regression. Beta is the regression coefficient, Pval is the p-value for the regression coefficient of expression on age (in days). Effect category is increasing if beta is positive and significant, decreasing if beta is negative and significant, and other if the ANOVA were significant rather than the linear regression. Local eQTL is 1 if the gene had a significant local eQTL**

| Gene           | Tissue  | Anova.pval | Beta      | Pval     | EffectCategory | Local eQTL |
|----------------|---------|------------|-----------|----------|----------------|------------|
| <i>UBE2T</i>   | Adrenal | 2.78E-11   | -0.00086  | 1.14E-11 | decreasing     | 0          |
| <i>UBE2V1</i>  | Adrenal | 3.23E-11   | -0.00051  | 0.000489 | other          | 0          |
| <i>UBFD1</i>   | Adrenal | 2.16E-08   | -0.00048  | 0.00062  | other          | 0          |
| <i>UCMA</i>    | Adrenal | 1.04E-06   | -0.00071  | 1.84E-07 | decreasing     | 0          |
| <i>URI1</i>    | Adrenal | 7.59E-08   | -0.00028  | 0.054907 | other          | 0          |
| <i>USP15</i>   | Adrenal | 3.27E-08   | 0.000417  | 0.004392 | other          | 0          |
| <i>USP4</i>    | Adrenal | 2.46E-08   | -0.00047  | 0.001087 | other          | 0          |
| <i>USP44</i>   | Adrenal | 2.61E-09   | 0.000711  | 1.09E-07 | increasing     | 0          |
| <i>USP54</i>   | Adrenal | 1.93E-07   | 0.000483  | 0.000849 | other          | 0          |
| <i>VAMP2</i>   | Adrenal | 2.19E-08   | 0.000415  | 0.004077 | other          | 0          |
| <i>VPS25</i>   | Adrenal | 4.12E-08   | -0.00074  | 2.84E-08 | decreasing     | 0          |
| <i>VSIG8</i>   | Adrenal | 3.09E-08   | 0.000304  | 0.044251 | other          | 0          |
| <i>VWA9</i>    | Adrenal | 9.73E-08   | -0.0005   | 0.000426 | other          | 0          |
| <i>WBSCR16</i> | Adrenal | 1.13E-06   | -0.00073  | 4.66E-08 | decreasing     | 0          |
| <i>WDR41</i>   | Adrenal | 4.06E-08   | -0.00039  | 0.008987 | other          | 0          |
| <i>WDR55</i>   | Adrenal | 1.48E-07   | -0.00051  | 0.000423 | other          | 0          |
| <i>WDR91</i>   | Adrenal | 3.89E-10   | 0.000281  | 0.055101 | other          | 0          |
| <i>WDR96</i>   | Adrenal | 8.55E-09   | 0.000678  | 6.57E-07 | increasing     | 0          |
| <i>WFIKKN1</i> | Adrenal | 2.19E-07   | 0.000536  | 0.000164 | other          | 0          |
| <i>WISP2</i>   | Adrenal | 2.35E-08   | 0.000514  | 0.000244 | other          | 0          |
| <i>WNK2</i>    | Adrenal | 6.84E-12   | 0.000356  | 0.014466 | other          | 0          |
| <i>XPO6</i>    | Adrenal | 1.73E-07   | -0.00057  | 5.24E-05 | decreasing     | 0          |
| <i>YBX3</i>    | Adrenal | 1.76E-07   | -0.0003   | 0.038707 | other          | 0          |
| <i>ZBTB4</i>   | Adrenal | 5.58E-08   | 0.000379  | 0.009604 | other          | 0          |
| <i>ZBTB7C</i>  | Adrenal | 6.42E-10   | -1.02E-05 | 0.946014 | other          | 0          |
| <i>ZC2HC1A</i> | Adrenal | 5.01E-06   | 0.000745  | 3.06E-08 | increasing     | 0          |
| <i>ZDHC15</i>  | Adrenal | 1.09E-09   | 0.000727  | 4.40E-08 | increasing     | 0          |
| <i>ZMAT1</i>   | Adrenal | 4.10E-08   | 0.000674  | 8.42E-07 | increasing     | 0          |
| <i>ZMYM6NB</i> | Adrenal | 3.92E-08   | -0.00068  | 5.11E-07 | decreasing     | 0          |
| <i>ZNF483</i>  | Adrenal | 1.47E-07   | 0.000689  | 4.77E-07 | increasing     | 0          |
| <i>ZNF536</i>  | Adrenal | 9.64E-08   | -0.00052  | 0.000151 | other          | 0          |
| <i>ZNF540</i>  | Adrenal | 2.47E-10   | 0.000781  | 1.09E-09 | increasing     | 0          |
| <i>ZSCAN18</i> | Adrenal | 3.67E-08   | -9.67E-06 | 0.948116 | other          | 0          |
| <i>ZSWIM8</i>  | Adrenal | 3.11E-08   | 0.000172  | 0.25077  | other          | 0          |
| <i>ZWINT</i>   | Adrenal | 3.36E-10   | -0.00081  | 2.31E-10 | decreasing     | 0          |
| <i>AAAS</i>    | BA46    | 2.17E-08   | 0.000673  | 4.21E-07 | increasing     | 0          |
| <i>AATK</i>    | BA46    | 3.93E-08   | 0.000766  | 6.18E-09 | increasing     | 0          |
| <i>ABCA8</i>   | BA46    | 1.04E-11   | 0.000821  | 4.41E-11 | increasing     | 0          |
| <i>ABCC3</i>   | BA46    | 1.92E-10   | -0.00061  | 1.18E-05 | decreasing     | 0          |
| <i>ABCC8</i>   | BA46    | 1.08E-16   | 0.000883  | 5.22E-13 | increasing     | 0          |

**Supplementary Table 9. Genes with a significant age effect from either ANOVA or linear regression. Beta is the regression coefficient, Pval is the p-value for the regression coefficient of expression on age (in days). Effect category is increasing if beta is positive and significant, decreasing if beta is negative and significant, and other if the ANOVA were significant rather than the linear regression. Local eQTL is 1 if the gene had a significant local eQTL**

| Gene            | Tissue | Anova.pval | Beta     | Pval     | EffectCategory | Local eQTL |
|-----------------|--------|------------|----------|----------|----------------|------------|
| <i>ABCC9</i>    | BA46   | 2.28E-08   | -0.0007  | 2.81E-07 | decreasing     | 0          |
| <i>ABCG1</i>    | BA46   | 5.59E-09   | 0.000801 | 1.38E-10 | increasing     | 0          |
| <i>ABHD17C</i>  | BA46   | 2.16E-07   | -0.00066 | 1.70E-06 | decreasing     | 0          |
| <i>ABHD2</i>    | BA46   | 1.65E-07   | -0.00066 | 1.90E-06 | decreasing     | 0          |
| <i>ABHD5</i>    | BA46   | 4.00E-10   | -0.00077 | 4.69E-09 | decreasing     | 0          |
| <i>ABI3BP</i>   | BA46   | 5.16E-09   | -0.00049 | 0.000746 | other          | 0          |
| <i>ABLIM2</i>   | BA46   | 2.69E-12   | 0.000798 | 3.59E-10 | increasing     | 0          |
| <i>ABTB1</i>    | BA46   | 7.53E-08   | 0.00074  | 2.92E-08 | increasing     | 1          |
| <i>ACAD10</i>   | BA46   | 2.33E-07   | 0.000714 | 4.76E-08 | increasing     | 0          |
| <i>ACHE</i>     | BA46   | 1.29E-06   | 0.000749 | 2.01E-08 | increasing     | 0          |
| <i>ACOT11</i>   | BA46   | 2.71E-08   | 0.000536 | 0.000145 | other          | 1          |
| <i>ACSL6</i>    | BA46   | 1.53E-07   | -0.00039 | 0.006589 | other          | 0          |
| <i>ACTN1</i>    | BA46   | 3.00E-08   | 0.000142 | 0.341383 | other          | 0          |
| <i>ACVR1</i>    | BA46   | 1.40E-05   | -0.00073 | 7.41E-08 | decreasing     | 0          |
| <i>ACVR2A</i>   | BA46   | 1.13E-10   | -0.00075 | 7.37E-09 | decreasing     | 0          |
| <i>ADAM19</i>   | BA46   | 6.18E-11   | -0.00083 | 3.74E-11 | decreasing     | 0          |
| <i>ADAM32</i>   | BA46   | 2.62E-13   | 0.000822 | 9.26E-11 | increasing     | 0          |
| <i>ADAM33</i>   | BA46   | 9.12E-09   | 0.000643 | 3.29E-06 | increasing     | 0          |
| <i>ADAMTS15</i> | BA46   | 1.06E-11   | -0.00084 | 1.72E-11 | decreasing     | 0          |
| <i>ADAMTS17</i> | BA46   | 3.82E-06   | -0.00072 | 1.12E-07 | decreasing     | 0          |
| <i>ADAMTS18</i> | BA46   | 6.93E-06   | -0.00073 | 6.38E-08 | decreasing     | 0          |
| <i>ADAMTS9</i>  | BA46   | 1.72E-13   | -0.00083 | 2.55E-11 | decreasing     | 0          |
| <i>ADAMTSL2</i> | BA46   | 3.62E-11   | -0.00076 | 2.23E-09 | decreasing     | 0          |
| <i>ADARB1</i>   | BA46   | 2.42E-07   | -0.00014 | 0.356524 | other          | 0          |
| <i>ADCK3</i>    | BA46   | 6.73E-10   | 0.000799 | 7.70E-11 | increasing     | 0          |
| <i>ADCY2</i>    | BA46   | 1.15E-07   | -0.00013 | 0.397717 | other          | 0          |
| <i>ADCY7</i>    | BA46   | 2.35E-07   | -0.00069 | 3.52E-07 | decreasing     | 0          |
| <i>ADCY9</i>    | BA46   | 3.33E-09   | 0.00066  | 8.06E-07 | increasing     | 0          |
| <i>ADD1</i>     | BA46   | 6.94E-08   | 0.000465 | 0.001199 | other          | 0          |
| <i>ADORA1</i>   | BA46   | 3.37E-10   | 0.000592 | 2.63E-05 | increasing     | 1          |
| <i>ADPRHL1</i>  | BA46   | 1.96E-10   | 0.00017  | 0.242943 | other          | 0          |
| <i>ADRA1B</i>   | BA46   | 7.46E-11   | 0.000104 | 0.484593 | other          | 0          |
| <i>ADRA1D</i>   | BA46   | 1.55E-09   | -0.00015 | 0.296781 | other          | 0          |
| <i>AEBP2</i>    | BA46   | 1.38E-08   | 0.000678 | 2.06E-07 | increasing     | 0          |
| <i>AFF2</i>     | BA46   | 1.33E-09   | -0.0008  | 4.56E-10 | decreasing     | 0          |
| <i>AGA</i>      | BA46   | 2.40E-08   | 0.000159 | 0.290492 | other          | 0          |
| <i>AGPAT9</i>   | BA46   | 1.71E-09   | 0.000624 | 4.14E-06 | increasing     | 0          |
| <i>AGRN</i>     | BA46   | 1.29E-10   | -0.00082 | 4.15E-11 | decreasing     | 0          |
| <i>AGTPBP1</i>  | BA46   | 6.99E-08   | -0.00062 | 6.31E-06 | decreasing     | 0          |
| <i>AHCYL1</i>   | BA46   | 1.03E-07   | 0.000648 | 1.70E-06 | increasing     | 0          |

**Supplementary Table 9. Genes with a significant age effect from either ANOVA or linear regression. Beta is the regression coefficient, Pval is the p-value for the regression coefficient of expression on age (in days). Effect category is increasing if beta is positive and significant, decreasing if beta is negative and significant, and other if the ANOVA were significant rather than the linear regression. Local eQTL is 1 if the gene had a significant local eQTL**

| Gene            | Tissue | Anova.pval | Beta     | Pval     | EffectCategory | Local eQTL |
|-----------------|--------|------------|----------|----------|----------------|------------|
| <i>AHI1</i>     | BA46   | 1.60E-08   | 0.000704 | 1.05E-07 | increasing     | 0          |
| <i>AIRE</i>     | BA46   | 6.36E-16   | 0.000864 | 4.89E-13 | increasing     | 0          |
| <i>AK5</i>      | BA46   | 9.54E-11   | 0.000597 | 1.24E-05 | increasing     | 0          |
| <i>AKAP12</i>   | BA46   | 2.35E-17   | 0.000829 | 1.43E-11 | increasing     | 0          |
| <i>AKAP7</i>    | BA46   | 1.90E-08   | -0.0005  | 0.000387 | other          | 0          |
| <i>AKTIP</i>    | BA46   | 1.08E-07   | 0.000392 | 0.00633  | other          | 0          |
| <i>ALCAM</i>    | BA46   | 2.33E-09   | -0.00066 | 1.19E-06 | decreasing     | 0          |
| <i>ALDH1A1</i>  | BA46   | 3.66E-09   | -0.00053 | 0.000171 | other          | 0          |
| <i>ALDOA</i>    | BA46   | 2.31E-11   | 0.000779 | 7.33E-10 | increasing     | 0          |
| <i>ALDOC</i>    | BA46   | 1.79E-07   | 0.000662 | 7.14E-07 | increasing     | 0          |
| <i>ALKBH5</i>   | BA46   | 1.18E-07   | 0.000685 | 2.86E-07 | increasing     | 0          |
| <i>ALOX15B</i>  | BA46   | 5.96E-10   | -0.00023 | 0.017473 | other          | 0          |
| <i>ANGEL1</i>   | BA46   | 3.85E-10   | 0.000843 | 4.20E-11 | increasing     | 0          |
| <i>ANKH</i>     | BA46   | 3.42E-09   | 0.000734 | 1.45E-08 | increasing     | 0          |
| <i>ANKMY2</i>   | BA46   | 5.07E-07   | 0.000728 | 8.27E-08 | increasing     | 0          |
| <i>ANKRD12</i>  | BA46   | 7.49E-08   | 0.000392 | 0.006366 | other          | 0          |
| <i>ANKRD2</i>   | BA46   | 8.25E-07   | 0.000676 | 2.35E-07 | increasing     | 0          |
| <i>ANKRD32</i>  | BA46   | 6.32E-06   | 0.000696 | 1.91E-07 | increasing     | 0          |
| <i>ANKRD35</i>  | BA46   | 1.77E-09   | 0.000765 | 5.73E-09 | increasing     | 1          |
| <i>ANKRD42</i>  | BA46   | 7.10E-12   | 0.000789 | 5.02E-10 | increasing     | 1          |
| <i>ANKRD50</i>  | BA46   | 2.12E-08   | -0.0006  | 8.37E-06 | decreasing     | 0          |
| <i>ANKRD63</i>  | BA46   | 1.60E-15   | 0.000652 | 7.81E-07 | increasing     | 0          |
| <i>ANKZF1</i>   | BA46   | 4.06E-05   | 0.000717 | 1.09E-07 | increasing     | 0          |
| <i>ANLN</i>     | BA46   | 3.69E-12   | 0.000801 | 4.51E-10 | increasing     | 0          |
| <i>ANTXR1</i>   | BA46   | 1.27E-07   | -0.00067 | 6.49E-07 | decreasing     | 0          |
| <i>ANXA11</i>   | BA46   | 3.72E-11   | 0.000713 | 2.96E-08 | increasing     | 1          |
| <i>ANXA4</i>    | BA46   | 2.57E-05   | 0.000707 | 2.47E-07 | increasing     | 0          |
| <i>ANXA7</i>    | BA46   | 9.83E-07   | 0.000746 | 9.09E-09 | increasing     | 0          |
| <i>AP4B1</i>    | BA46   | 9.96E-06   | 0.000711 | 1.90E-07 | increasing     | 1          |
| <i>APC</i>      | BA46   | 2.30E-20   | -0.00092 | 1.11E-14 | decreasing     | 0          |
| <i>APLN</i>     | BA46   | 4.37E-07   | -0.00074 | 4.59E-08 | decreasing     | 0          |
| <i>AQP11</i>    | BA46   | 1.51E-09   | 0.000668 | 5.38E-07 | increasing     | 0          |
| <i>ARC</i>      | BA46   | 5.44E-11   | -0.00076 | 6.91E-09 | decreasing     | 0          |
| <i>ARFGAP2</i>  | BA46   | 5.31E-08   | 0.000137 | 0.349208 | other          | 0          |
| <i>ARHGAP10</i> | BA46   | 4.73E-09   | -0.00063 | 6.10E-06 | decreasing     | 0          |
| <i>ARHGAP15</i> | BA46   | 5.82E-08   | -0.00051 | 0.00038  | other          | 0          |
| <i>ARHGAP18</i> | BA46   | 9.85E-09   | -0.00048 | 0.000696 | other          | 0          |
| <i>ARHGAP20</i> | BA46   | 2.69E-08   | -0.00079 | 2.49E-09 | decreasing     | 0          |
| <i>ARHGAP26</i> | BA46   | 3.46E-09   | 0.000657 | 1.44E-06 | increasing     | 0          |
| <i>ARHGAP4</i>  | BA46   | 2.40E-07   | 7.36E-05 | 0.625121 | other          | 0          |

**Supplementary Table 9. Genes with a significant age effect from either ANOVA or linear regression. Beta is the regression coefficient, Pval is the p-value for the regression coefficient of expression on age (in days). Effect category is increasing if beta is positive and significant, decreasing if beta is negative and significant, and other if the ANOVA were significant rather than the linear regression. Local eQTL is 1 if the gene had a significant local eQTL**

| Gene            | Tissue | Anova.pval | Beta     | Pval     | EffectCategory | Local eQTL |
|-----------------|--------|------------|----------|----------|----------------|------------|
| <i>ARHGAP9</i>  | BA46   | 2.76E-08   | 0.000745 | 1.20E-08 | increasing     | 0          |
| <i>ARHGEF17</i> | BA46   | 2.40E-12   | 0.000841 | 2.54E-11 | increasing     | 0          |
| <i>ARHGEF18</i> | BA46   | 1.12E-07   | -0.00069 | 2.68E-07 | decreasing     | 1          |
| <i>ARHGEF2</i>  | BA46   | 9.55E-11   | -0.00077 | 1.61E-09 | decreasing     | 0          |
| <i>ARHGEF25</i> | BA46   | 1.66E-07   | 0.000717 | 5.30E-08 | increasing     | 0          |
| <i>ARHGEF37</i> | BA46   | 2.09E-07   | 0.00072  | 1.11E-07 | increasing     | 0          |
| <i>ARID5B</i>   | BA46   | 8.90E-07   | 0.000701 | 1.99E-07 | increasing     | 0          |
| <i>ARL2</i>     | BA46   | 3.93E-09   | 0.000629 | 7.55E-06 | increasing     | 0          |
| <i>ARL4D</i>    | BA46   | 4.81E-09   | -0.00065 | 1.98E-06 | decreasing     | 0          |
| <i>ARMC5</i>    | BA46   | 8.02E-08   | 0.000669 | 1.47E-06 | increasing     | 0          |
| <i>ARMC6</i>    | BA46   | 8.16E-08   | -0.00043 | 0.002807 | other          | 0          |
| <i>ARPP21</i>   | BA46   | 1.15E-15   | -0.00087 | 3.44E-13 | decreasing     | 0          |
| <i>ARRDC3</i>   | BA46   | 1.13E-07   | 0.000239 | 0.106983 | other          | 0          |
| <i>ARRDC4</i>   | BA46   | 4.77E-10   | -0.00071 | 4.02E-08 | decreasing     | 0          |
| <i>ASAP1</i>    | BA46   | 6.46E-12   | -0.00076 | 1.25E-08 | decreasing     | 0          |
| <i>ASAP2</i>    | BA46   | 3.71E-11   | -0.00084 | 2.89E-11 | decreasing     | 0          |
| <i>ASB2</i>     | BA46   | 7.66E-13   | 0.000813 | 5.17E-11 | increasing     | 0          |
| <i>ASIC2</i>    | BA46   | 3.08E-12   | -0.00083 | 7.94E-12 | decreasing     | 0          |
| <i>ASTN1</i>    | BA46   | 7.48E-09   | -0.0007  | 1.12E-07 | decreasing     | 0          |
| <i>ASTN2</i>    | BA46   | 1.93E-06   | -0.00071 | 1.20E-07 | decreasing     | 0          |
| <i>ASXL3</i>    | BA46   | 3.47E-09   | -0.00072 | 4.22E-08 | decreasing     | 0          |
| <i>ATF7IP</i>   | BA46   | 6.45E-12   | -0.00068 | 5.24E-07 | decreasing     | 0          |
| <i>ATG13</i>    | BA46   | 1.10E-13   | 0.00081  | 1.02E-10 | increasing     | 0          |
| <i>ATG9B</i>    | BA46   | 2.08E-10   | 0.000838 | 6.78E-11 | increasing     | 0          |
| <i>ATP11C</i>   | BA46   | 4.49E-10   | -0.00058 | 1.71E-05 | decreasing     | 0          |
| <i>ATP1A4</i>   | BA46   | 5.35E-08   | 0.000691 | 2.07E-07 | increasing     | 0          |
| <i>ATP2B2</i>   | BA46   | 2.32E-07   | -0.00061 | 1.62E-05 | decreasing     | 0          |
| <i>ATP2B3</i>   | BA46   | 9.20E-16   | 0.000869 | 5.58E-13 | increasing     | 0          |
| <i>ATP4A</i>    | BA46   | 3.24E-10   | 0.000326 | 0.025758 | other          | 1          |
| <i>ATP6V0B</i>  | BA46   | 1.67E-08   | -0.00055 | 9.62E-05 | decreasing     | 0          |
| <i>ATP6V1B2</i> | BA46   | 2.92E-08   | 0.000768 | 3.77E-09 | increasing     | 0          |
| <i>ATP8A1</i>   | BA46   | 5.33E-09   | 0.000758 | 1.42E-08 | increasing     | 0          |
| <i>ATP9B</i>    | BA46   | 1.81E-08   | 0.000627 | 3.58E-06 | increasing     | 0          |
| <i>ATPAF1</i>   | BA46   | 1.82E-08   | 0.000737 | 1.61E-08 | increasing     | 0          |
| <i>ATRNL1</i>   | BA46   | 1.06E-09   | 0.000512 | 0.000258 | other          | 0          |
| <i>B3GAT1</i>   | BA46   | 3.72E-08   | -0.00069 | 6.01E-07 | decreasing     | 0          |
| <i>B4GALNT3</i> | BA46   | 2.78E-08   | 0.00061  | 1.36E-05 | increasing     | 0          |
| <i>B4GALT2</i>  | BA46   | 1.15E-16   | -0.00089 | 3.79E-13 | decreasing     | 0          |
| <i>BACE2</i>    | BA46   | 7.44E-10   | -0.00077 | 7.41E-09 | decreasing     | 0          |
| <i>BAG5</i>     | BA46   | 3.62E-06   | 0.000686 | 2.10E-07 | increasing     | 0          |



**Supplementary Table 9. Genes with a significant age effect from either ANOVA or linear regression. Beta is the regression coefficient, Pval is the p-value for the regression coefficient of expression on age (in days). Effect category is increasing if beta is positive and significant, decreasing if beta is negative and significant, and other if the ANOVA were significant rather than the linear regression. Local eQTL is 1 if the gene had a significant local eQTL**

| Gene               | Tissue | Anova.pval | Beta      | Pval     | EffectCategory | Local eQTL |
|--------------------|--------|------------|-----------|----------|----------------|------------|
| <i>BAIAP3</i>      | BA46   | 1.37E-13   | 0.000836  | 2.86E-12 | increasing     | 0          |
| <i>BAMBI</i>       | BA46   | 2.03E-07   | -0.00055  | 8.52E-05 | decreasing     | 0          |
| <i>BAZ1B</i>       | BA46   | 1.15E-07   | 0.000679  | 1.98E-07 | increasing     | 0          |
| <i>BBX</i>         | BA46   | 3.28E-10   | 0.000813  | 8.20E-11 | increasing     | 0          |
| <i>BCAN</i>        | BA46   | 3.97E-12   | -0.00083  | 1.86E-11 | decreasing     | 0          |
| <i>BCAP31</i>      | BA46   | 4.30E-09   | 0.000746  | 3.70E-09 | increasing     | 0          |
| <i>BDKRB1</i>      | BA46   | 2.62E-13   | 0.000815  | 2.25E-10 | increasing     | 0          |
| <i>BDKRB2</i>      | BA46   | 5.02E-11   | 0.000752  | 4.44E-09 | increasing     | 0          |
| <i>BEGAIN</i>      | BA46   | 1.28E-07   | -0.00055  | 0.000128 | other          | 0          |
| <i>BHLHE22</i>     | BA46   | 5.06E-09   | -0.00065  | 1.02E-06 | decreasing     | 0          |
| <i>BHLHE41</i>     | BA46   | 7.03E-11   | 0.000696  | 8.02E-08 | increasing     | 0          |
| <i>BHMT2</i>       | BA46   | 2.51E-08   | 0.000207  | 0.16288  | other          | 1          |
| <i>BICD1</i>       | BA46   | 8.61E-11   | -0.00075  | 2.18E-08 | decreasing     | 0          |
| <i>BIN2</i>        | BA46   | 1.15E-06   | -0.00072  | 8.83E-08 | decreasing     | 0          |
| <i>BLCAP</i>       | BA46   | 7.27E-08   | 0.000516  | 0.000377 | other          | 0          |
| <i>BLVRA</i>       | BA46   | 3.85E-15   | 0.000832  | 4.08E-12 | increasing     | 0          |
| <i>BMP2K</i>       | BA46   | 1.44E-07   | -0.00047  | 0.000981 | other          | 0          |
| <i>BMP4</i>        | BA46   | 9.45E-06   | 0.000716  | 1.50E-07 | increasing     | 0          |
| <i>BRD8</i>        | BA46   | 7.41E-08   | 0.000738  | 4.18E-08 | increasing     | 0          |
| <i>BRINP1</i>      | BA46   | 4.35E-08   | -0.0007   | 2.97E-07 | decreasing     | 0          |
| <i>BRINP2</i>      | BA46   | 4.06E-13   | -0.00081  | 1.64E-10 | decreasing     | 1          |
| <i>BRINP3</i>      | BA46   | 1.02E-15   | -0.00087  | 1.40E-12 | decreasing     | 0          |
| <i>BTBD17</i>      | BA46   | 1.17E-10   | -0.00083  | 5.70E-11 | decreasing     | 0          |
| <i>BTBD3</i>       | BA46   | 2.40E-08   | 0.000605  | 9.23E-06 | increasing     | 0          |
| <i>BTG3</i>        | BA46   | 4.57E-11   | -0.00071  | 8.62E-08 | decreasing     | 0          |
| <i>BTNL8</i>       | BA46   | 1.38E-07   | 0.000668  | 1.01E-06 | increasing     | 0          |
| <i>C11H12orf29</i> | BA46   | 8.23E-07   | 0.000741  | 5.25E-09 | increasing     | 0          |
| <i>C11H12orf49</i> | BA46   | 2.30E-07   | -0.00073  | 4.81E-08 | decreasing     | 0          |
| <i>C11H12orf5</i>  | BA46   | 2.94E-08   | -0.00024  | 0.110995 | other          | 0          |
| <i>C12H9orf16</i>  | BA46   | 3.46E-08   | -0.0007   | 2.25E-07 | decreasing     | 0          |
| <i>C12H9orf41</i>  | BA46   | 1.79E-06   | -0.00073  | 7.40E-08 | decreasing     | 0          |
| <i>C12H9orf91</i>  | BA46   | 6.41E-09   | 0.000812  | 4.65E-10 | increasing     | 0          |
| <i>C14H2orf91</i>  | BA46   | 3.47E-08   | -5.25E-05 | 0.728454 | other          | 1          |
| <i>C15H3orf70</i>  | BA46   | 6.48E-07   | -0.00072  | 9.52E-08 | decreasing     | 0          |
| <i>C15H3orf80</i>  | BA46   | 2.48E-07   | 0.00063   | 3.19E-06 | increasing     | 0          |
| <i>C16H17orf58</i> | BA46   | 1.42E-08   | -0.0007   | 1.34E-07 | decreasing     | 0          |
| <i>C17H6orf106</i> | BA46   | 6.32E-08   | -0.00012  | 0.432127 | other          | 0          |
| <i>C17H6orf141</i> | BA46   | 1.64E-08   | -0.00019  | 0.210495 | other          | 0          |
| <i>C18H18orf54</i> | BA46   | 1.64E-08   | -0.0006   | 1.08E-05 | decreasing     | 0          |
| <i>C19H22orf24</i> | BA46   | 4.29E-07   | 0.000709  | 1.47E-07 | increasing     | 0          |

**Supplementary Table 9. Genes with a significant age effect from either ANOVA or linear regression. Beta is the regression coefficient, Pval is the p-value for the regression coefficient of expression on age (in days). Effect category is increasing if beta is positive and significant, decreasing if beta is negative and significant, and other if the ANOVA were significant rather than the linear regression. Local eQTL is 1 if the gene had a significant local eQTL**

| Gene               | Tissue | Anova.pval | Beta     | Pval     | EffectCategory | Local eQTL |
|--------------------|--------|------------|----------|----------|----------------|------------|
| <i>C1H11orf24</i>  | BA46   | 1.97E-11   | -0.00085 | 1.02E-11 | decreasing     | 0          |
| <i>C1QTNF1</i>     | BA46   | 8.16E-16   | -0.0009  | 1.54E-13 | decreasing     | 0          |
| <i>C22H3orf56</i>  | BA46   | 2.24E-12   | -0.00081 | 2.36E-11 | decreasing     | 0          |
| <i>C25H1orf106</i> | BA46   | 1.65E-11   | -0.00076 | 9.59E-09 | decreasing     | 0          |
| <i>C25H1orf21</i>  | BA46   | 6.25E-08   | -0.00061 | 1.01E-05 | decreasing     | 0          |
| <i>C25H1orf95</i>  | BA46   | 8.04E-07   | -0.00073 | 5.97E-08 | decreasing     | 0          |
| <i>C27H4orf19</i>  | BA46   | 6.64E-06   | -0.00076 | 1.50E-08 | decreasing     | 0          |
| <i>C2CD2</i>       | BA46   | 4.83E-10   | 0.000764 | 1.04E-09 | increasing     | 0          |
| <i>C2CD4C</i>      | BA46   | 2.69E-08   | 0.000802 | 8.39E-10 | increasing     | 0          |
| <i>C8H8orf34</i>   | BA46   | 2.13E-21   | -0.00089 | 5.37E-15 | decreasing     | 0          |
| <i>C8H8orf88</i>   | BA46   | 2.44E-07   | 0.000763 | 1.03E-08 | increasing     | 0          |
| <i>C9H10orf11</i>  | BA46   | 1.20E-10   | 0.00065  | 1.24E-06 | increasing     | 0          |
| <i>C9H10orf90</i>  | BA46   | 2.82E-10   | 0.000824 | 1.16E-10 | increasing     | 0          |
| <i>CA11</i>        | BA46   | 2.03E-08   | -0.00022 | 0.134082 | other          | 0          |
| <i>CABP1</i>       | BA46   | 2.36E-15   | 0.000861 | 7.03E-13 | increasing     | 0          |
| <i>CACNA1G</i>     | BA46   | 1.92E-06   | -0.00076 | 4.73E-09 | decreasing     | 0          |
| <i>CACNA1S</i>     | BA46   | 1.31E-12   | -0.00079 | 2.47E-10 | decreasing     | 0          |
| <i>CACNG4</i>      | BA46   | 4.46E-13   | -0.00085 | 2.48E-12 | decreasing     | 0          |
| <i>CADM1</i>       | BA46   | 1.41E-10   | -0.00077 | 2.13E-09 | decreasing     | 0          |
| <i>CALCOCO1</i>    | BA46   | 3.76E-14   | 0.00085  | 1.97E-12 | increasing     | 0          |
| <i>CALM1</i>       | BA46   | 3.76E-06   | -0.00071 | 1.68E-07 | decreasing     | 0          |
| <i>CALN1</i>       | BA46   | 3.65E-08   | -0.0006  | 1.18E-05 | decreasing     | 0          |
| <i>CALU</i>        | BA46   | 4.19E-06   | -0.00073 | 6.78E-08 | decreasing     | 0          |
| <i>CAMK2B</i>      | BA46   | 4.30E-08   | -0.00064 | 1.99E-06 | decreasing     | 0          |
| <i>CAMK2G</i>      | BA46   | 1.27E-11   | 0.0008   | 1.45E-10 | increasing     | 0          |
| <i>CAMK2N1</i>     | BA46   | 1.03E-12   | -0.00054 | 0.000155 | other          | 0          |
| <i>CAMKK1</i>      | BA46   | 1.70E-21   | 0.000914 | 3.65E-15 | increasing     | 0          |
| <i>CAMSAP1</i>     | BA46   | 9.36E-08   | -0.00064 | 2.38E-06 | decreasing     | 0          |
| <i>CAP1</i>        | BA46   | 1.22E-09   | -0.00074 | 4.95E-08 | decreasing     | 0          |
| <i>CAPN14</i>      | BA46   | 1.59E-05   | -0.0007  | 2.16E-07 | decreasing     | 1          |
| <i>CAPS2</i>       | BA46   | 4.62E-15   | 0.000859 | 1.43E-12 | increasing     | 0          |
| <i>CARNS1</i>      | BA46   | 2.65E-12   | 0.000817 | 7.93E-11 | increasing     | 0          |
| <i>CARTPT</i>      | BA46   | 1.71E-07   | -0.0002  | 0.173192 | other          | 0          |
| <i>CASC3</i>       | BA46   | 3.93E-07   | 0.000767 | 8.05E-09 | increasing     | 0          |
| <i>CASK</i>        | BA46   | 1.46E-13   | -0.00083 | 3.57E-11 | decreasing     | 0          |
| <i>CAST</i>        | BA46   | 1.35E-07   | 0.000744 | 7.60E-09 | increasing     | 0          |
| <i>CBLN1</i>       | BA46   | 2.02E-08   | -0.00077 | 4.36E-09 | decreasing     | 0          |
| <i>CBR1</i>        | BA46   | 3.55E-08   | 0.000726 | 1.35E-08 | increasing     | 0          |
| <i>CBX7</i>        | BA46   | 2.93E-17   | 0.000873 | 2.07E-13 | increasing     | 0          |
| <i>CBX8</i>        | BA46   | 4.56E-16   | -0.00089 | 1.08E-13 | decreasing     | 0          |

**Supplementary Table 9. Genes with a significant age effect from either ANOVA or linear regression. Beta is the regression coefficient, Pval is the p-value for the regression coefficient of expression on age (in days). Effect category is increasing if beta is positive and significant, decreasing if beta is negative and significant, and other if the ANOVA were significant rather than the linear regression. Local eQTL is 1 if the gene had a significant local eQTL**

| Gene            | Tissue | Anova.pval | Beta     | Pval     | EffectCategory | Local eQTL |
|-----------------|--------|------------|----------|----------|----------------|------------|
| <i>CCDC136</i>  | BA46   | 5.57E-09   | 0.000693 | 3.20E-07 | increasing     | 0          |
| <i>CCDC147</i>  | BA46   | 1.30E-07   | 0.000417 | 0.003524 | other          | 0          |
| <i>CCDC15</i>   | BA46   | 2.94E-07   | -0.00074 | 2.01E-08 | decreasing     | 0          |
| <i>CCDC181</i>  | BA46   | 1.04E-07   | 0.000772 | 4.78E-09 | increasing     | 1          |
| <i>CCDC28A</i>  | BA46   | 1.97E-13   | 0.000865 | 4.19E-12 | increasing     | 0          |
| <i>CCDC37</i>   | BA46   | 1.51E-09   | -0.00056 | 4.38E-05 | decreasing     | 0          |
| <i>CCDC47</i>   | BA46   | 4.56E-09   | 0.000725 | 5.11E-08 | increasing     | 0          |
| <i>CCDC50</i>   | BA46   | 3.64E-12   | -0.00074 | 1.20E-08 | decreasing     | 0          |
| <i>CCDC64</i>   | BA46   | 1.87E-09   | -0.00079 | 3.20E-10 | decreasing     | 0          |
| <i>CCDC69</i>   | BA46   | 1.42E-07   | 0.000588 | 2.07E-05 | increasing     | 0          |
| <i>CCDC71L</i>  | BA46   | 2.49E-08   | 1.92E-05 | 0.898181 | other          | 0          |
| <i>CCDC80</i>   | BA46   | 7.30E-06   | -0.00071 | 1.93E-07 | decreasing     | 0          |
| <i>CCDC81</i>   | BA46   | 9.82E-12   | -0.00074 | 9.91E-09 | decreasing     | 0          |
| <i>CCDC85A</i>  | BA46   | 1.93E-08   | -0.0007  | 1.26E-07 | decreasing     | 0          |
| <i>CCDC85C</i>  | BA46   | 1.06E-08   | -0.00079 | 1.71E-09 | decreasing     | 0          |
| <i>CCDC88B</i>  | BA46   | 3.44E-09   | 0.000506 | 0.000256 | other          | 0          |
| <i>CCDC92</i>   | BA46   | 7.64E-11   | 0.000794 | 5.91E-10 | increasing     | 0          |
| <i>CCHCR1</i>   | BA46   | 4.23E-07   | 0.000744 | 2.69E-08 | increasing     | 0          |
| <i>CCK</i>      | BA46   | 1.69E-09   | 0.000568 | 5.92E-05 | increasing     | 0          |
| <i>CCND2</i>    | BA46   | 1.23E-09   | -0.0002  | 0.168824 | other          | 0          |
| <i>CD24</i>     | BA46   | 3.02E-12   | -0.00076 | 2.30E-09 | decreasing     | 0          |
| <i>CD276</i>    | BA46   | 2.73E-05   | -0.0007  | 5.32E-08 | decreasing     | 0          |
| <i>CD36</i>     | BA46   | 5.00E-09   | -0.00067 | 7.19E-07 | decreasing     | 0          |
| <i>CD53</i>     | BA46   | 3.44E-13   | 0.000588 | 1.35E-05 | increasing     | 0          |
| <i>CD96</i>     | BA46   | 1.54E-10   | -0.00077 | 8.64E-10 | decreasing     | 0          |
| <i>CDC14B</i>   | BA46   | 8.74E-08   | 0.000553 | 8.61E-05 | increasing     | 0          |
| <i>CDC42</i>    | BA46   | 5.49E-08   | -0.00054 | 0.000156 | other          | 0          |
| <i>CDC42BPB</i> | BA46   | 5.93E-09   | -0.0008  | 5.06E-10 | decreasing     | 0          |
| <i>CDCA7L</i>   | BA46   | 9.76E-08   | -0.00047 | 0.000891 | other          | 0          |
| <i>CDH10</i>    | BA46   | 3.13E-09   | -0.00073 | 2.28E-08 | decreasing     | 0          |
| <i>CDH11</i>    | BA46   | 4.28E-17   | -0.00086 | 1.89E-13 | decreasing     | 0          |
| <i>CDH13</i>    | BA46   | 4.29E-11   | -0.00075 | 7.85E-09 | decreasing     | 0          |
| <i>CDH26</i>    | BA46   | 5.99E-08   | 0.000551 | 5.57E-05 | increasing     | 1          |
| <i>CDH3</i>     | BA46   | 4.52E-09   | -0.00079 | 1.50E-09 | decreasing     | 0          |
| <i>CDH6</i>     | BA46   | 1.74E-13   | -0.00081 | 1.26E-10 | decreasing     | 0          |
| <i>CDIP1</i>    | BA46   | 1.34E-11   | 0.000744 | 1.28E-08 | increasing     | 0          |
| <i>CDK14</i>    | BA46   | 4.22E-15   | 0.000818 | 3.57E-11 | increasing     | 0          |
| <i>CDK18</i>    | BA46   | 2.76E-11   | 0.000768 | 4.35E-09 | increasing     | 0          |
| <i>CDK5R1</i>   | BA46   | 1.90E-07   | -0.00059 | 1.79E-05 | decreasing     | 0          |
| <i>CDK5R2</i>   | BA46   | 2.38E-09   | -0.00081 | 2.01E-10 | decreasing     | 0          |

**Supplementary Table 9. Genes with a significant age effect from either ANOVA or linear regression. Beta is the regression coefficient, Pval is the p-value for the regression coefficient of expression on age (in days). Effect category is increasing if beta is positive and significant, decreasing if beta is negative and significant, and other if the ANOVA were significant rather than the linear regression. Local eQTL is 1 if the gene had a significant local eQTL**

| Gene           | Tissue | Anova.pval | Beta     | Pval     | EffectCategory | Local eQTL |
|----------------|--------|------------|----------|----------|----------------|------------|
| <i>CDK6</i>    | BA46   | 2.23E-08   | 0.000698 | 1.95E-07 | increasing     | 0          |
| <i>CDKL2</i>   | BA46   | 4.10E-08   | -0.00067 | 7.59E-07 | decreasing     | 0          |
| <i>CDKN1C</i>  | BA46   | 7.11E-09   | 0.000659 | 1.94E-06 | increasing     | 0          |
| <i>CDR1</i>    | BA46   | 1.29E-10   | 0.000787 | 1.46E-09 | increasing     | 0          |
| <i>CDYL</i>    | BA46   | 2.81E-13   | 0.000782 | 5.78E-10 | increasing     | 0          |
| <i>CECR6</i>   | BA46   | 1.25E-10   | -0.00082 | 1.21E-10 | decreasing     | 0          |
| <i>CELF2</i>   | BA46   | 5.14E-07   | -0.00076 | 5.65E-09 | decreasing     | 0          |
| <i>CEND1</i>   | BA46   | 2.36E-10   | 0.000799 | 4.74E-10 | increasing     | 0          |
| <i>CENPB</i>   | BA46   | 1.98E-07   | -0.00074 | 3.19E-08 | decreasing     | 0          |
| <i>CEP112</i>  | BA46   | 8.59E-08   | 0.000572 | 5.70E-05 | increasing     | 0          |
| <i>CEP290</i>  | BA46   | 6.29E-06   | 0.000732 | 6.21E-08 | increasing     | 0          |
| <i>CEP72</i>   | BA46   | 6.41E-14   | -0.00083 | 1.81E-11 | decreasing     | 0          |
| <i>CETP</i>    | BA46   | 2.24E-11   | -0.00084 | 3.32E-11 | decreasing     | 0          |
| <i>CHAF1B</i>  | BA46   | 2.25E-07   | 0.000696 | 3.43E-07 | increasing     | 0          |
| <i>CHCHD7</i>  | BA46   | 5.32E-06   | 0.00069  | 1.07E-07 | increasing     | 0          |
| <i>CHD3</i>    | BA46   | 2.43E-13   | -0.00085 | 3.02E-12 | decreasing     | 0          |
| <i>CHD6</i>    | BA46   | 1.13E-15   | 0.000867 | 3.68E-13 | increasing     | 0          |
| <i>CHI3L1</i>  | BA46   | 3.32E-11   | 0.000704 | 1.26E-07 | increasing     | 0          |
| <i>CHN2</i>    | BA46   | 5.21E-08   | -0.00045 | 0.001806 | other          | 0          |
| <i>CHRM2</i>   | BA46   | 3.50E-08   | -0.00054 | 0.000104 | other          | 0          |
| <i>CHRNA2</i>  | BA46   | 3.84E-06   | -0.00075 | 2.15E-08 | decreasing     | 0          |
| <i>CHRNA7</i>  | BA46   | 3.11E-08   | 0.0003   | 0.042543 | other          | 0          |
| <i>CIRBP</i>   | BA46   | 1.30E-07   | 0.000103 | 0.495659 | other          | 0          |
| <i>CISD3</i>   | BA46   | 1.97E-07   | 0.000425 | 0.003135 | other          | 0          |
| <i>CIT</i>     | BA46   | 1.58E-08   | 0.00069  | 2.24E-07 | increasing     | 0          |
| <i>CLASP2</i>  | BA46   | 2.74E-08   | -0.00062 | 5.02E-06 | decreasing     | 0          |
| <i>CLCN5</i>   | BA46   | 1.13E-06   | 0.000712 | 6.81E-08 | increasing     | 0          |
| <i>CLDND1</i>  | BA46   | 2.82E-10   | 0.000833 | 3.39E-11 | increasing     | 0          |
| <i>CLIC6</i>   | BA46   | 6.15E-08   | 3.43E-05 | 0.818838 | other          | 0          |
| <i>CLK4</i>    | BA46   | 2.00E-07   | -0.00065 | 2.82E-06 | decreasing     | 0          |
| <i>CLMP</i>    | BA46   | 9.83E-08   | -0.00015 | 0.322998 | other          | 0          |
| <i>CLN6</i>    | BA46   | 9.61E-09   | 0.00077  | 1.35E-09 | increasing     | 0          |
| <i>CLOCK</i>   | BA46   | 7.90E-08   | -0.00079 | 2.35E-09 | decreasing     | 0          |
| <i>CMYA5</i>   | BA46   | 2.40E-14   | 0.000812 | 2.61E-11 | increasing     | 1          |
| <i>CNDP1</i>   | BA46   | 1.08E-15   | 0.00087  | 1.47E-12 | increasing     | 0          |
| <i>CNP</i>     | BA46   | 6.28E-08   | 0.000697 | 1.21E-07 | increasing     | 0          |
| <i>CNTN2</i>   | BA46   | 2.37E-15   | 0.00087  | 1.76E-12 | increasing     | 0          |
| <i>CNTN3</i>   | BA46   | 1.45E-08   | -0.00069 | 2.57E-07 | decreasing     | 0          |
| <i>CNTNAP1</i> | BA46   | 1.99E-07   | 0.00042  | 0.003574 | other          | 0          |
| <i>CNTNAP5</i> | BA46   | 1.55E-07   | -0.00068 | 5.16E-07 | decreasing     | 0          |

**Supplementary Table 9. Genes with a significant age effect from either ANOVA or linear regression. Beta is the regression coefficient, Pval is the p-value for the regression coefficient of expression on age (in days). Effect category is increasing if beta is positive and significant, decreasing if beta is negative and significant, and other if the ANOVA were significant rather than the linear regression. Local eQTL is 1 if the gene had a significant local eQTL**

| Gene            | Tissue | Anova.pval | Beta     | Pval     | EffectCategory | Local eQTL |
|-----------------|--------|------------|----------|----------|----------------|------------|
| <i>COBLL1</i>   | BA46   | 1.49E-07   | -0.00069 | 5.52E-07 | decreasing     | 0          |
| <i>COCH</i>     | BA46   | 1.61E-13   | -0.00083 | 3.53E-11 | decreasing     | 0          |
| <i>COG2</i>     | BA46   | 2.78E-08   | 0.000713 | 6.50E-08 | increasing     | 0          |
| <i>COG5</i>     | BA46   | 6.67E-07   | 0.000747 | 8.97E-09 | increasing     | 0          |
| <i>COL19A1</i>  | BA46   | 1.24E-08   | -0.00032 | 0.031876 | other          | 0          |
| <i>COL22A1</i>  | BA46   | 6.96E-06   | -0.00071 | 1.15E-07 | decreasing     | 0          |
| <i>COL23A1</i>  | BA46   | 1.06E-10   | -0.00012 | 0.418085 | other          | 0          |
| <i>COL26A1</i>  | BA46   | 2.14E-15   | -0.00088 | 1.29E-13 | decreasing     | 0          |
| <i>COL4A1</i>   | BA46   | 1.83E-15   | -0.00084 | 4.36E-12 | decreasing     | 0          |
| <i>COL4A2</i>   | BA46   | 1.98E-15   | -0.00085 | 9.22E-13 | decreasing     | 0          |
| <i>COL5A2</i>   | BA46   | 1.45E-12   | -0.00085 | 2.06E-11 | decreasing     | 0          |
| <i>COL5A3</i>   | BA46   | 2.57E-08   | -0.00056 | 7.99E-05 | decreasing     | 0          |
| <i>COL8A1</i>   | BA46   | 1.15E-07   | 0.000801 | 6.20E-10 | increasing     | 0          |
| <i>COLQ</i>     | BA46   | 2.02E-11   | 0.000821 | 1.29E-10 | increasing     | 1          |
| <i>COMMD2</i>   | BA46   | 1.89E-07   | -0.0005  | 0.000455 | other          | 0          |
| <i>COQ10A</i>   | BA46   | 7.08E-08   | -0.00059 | 2.66E-05 | decreasing     | 0          |
| <i>CPB1</i>     | BA46   | 2.17E-15   | 0.000841 | 1.21E-13 | increasing     | 0          |
| <i>CPEB1</i>    | BA46   | 1.08E-17   | 0.000882 | 7.48E-14 | increasing     | 0          |
| <i>CPEB3</i>    | BA46   | 3.52E-06   | 0.000713 | 1.53E-07 | increasing     | 0          |
| <i>CPLX1</i>    | BA46   | 1.51E-09   | 0.000698 | 1.44E-07 | increasing     | 0          |
| <i>CPNE6</i>    | BA46   | 2.32E-08   | -0.00072 | 7.06E-08 | decreasing     | 0          |
| <i>CREBRF</i>   | BA46   | 8.32E-18   | 0.000896 | 3.06E-14 | increasing     | 0          |
| <i>CRH</i>      | BA46   | 3.25E-10   | -0.00079 | 9.93E-10 | decreasing     | 0          |
| <i>CRHBP</i>    | BA46   | 2.51E-07   | -0.00062 | 7.47E-06 | decreasing     | 0          |
| <i>CRISPLD1</i> | BA46   | 1.99E-11   | -0.00072 | 1.64E-08 | decreasing     | 0          |
| <i>CRKL</i>     | BA46   | 2.39E-12   | 0.000821 | 2.85E-11 | increasing     | 0          |
| <i>CRMP1</i>    | BA46   | 1.36E-12   | -0.00078 | 5.52E-10 | decreasing     | 0          |
| <i>CRTAC1</i>   | BA46   | 2.62E-09   | -0.00077 | 3.97E-09 | decreasing     | 0          |
| <i>CRYAB</i>    | BA46   | 1.58E-11   | 0.000775 | 9.40E-10 | increasing     | 0          |
| <i>CRYL1</i>    | BA46   | 5.90E-08   | 0.000578 | 3.07E-05 | increasing     | 0          |
| <i>CSDC2</i>    | BA46   | 3.64E-12   | -0.00081 | 2.49E-10 | decreasing     | 0          |
| <i>CSF1R</i>    | BA46   | 3.18E-07   | -0.00074 | 3.74E-08 | decreasing     | 0          |
| <i>CSMD2</i>    | BA46   | 9.91E-18   | -0.00086 | 3.84E-13 | decreasing     | 0          |
| <i>CSPG5</i>    | BA46   | 6.29E-10   | -0.00079 | 6.53E-10 | decreasing     | 0          |
| <i>CSRNP3</i>   | BA46   | 1.86E-08   | 1.11E-05 | 0.941096 | other          | 0          |
| <i>CSRP2</i>    | BA46   | 8.39E-09   | -0.00066 | 8.16E-07 | decreasing     | 0          |
| <i>CST6</i>     | BA46   | 4.67E-08   | 0.000765 | 9.91E-10 | increasing     | 0          |
| <i>CTDSPL2</i>  | BA46   | 3.50E-08   | 3.40E-05 | 0.822225 | other          | 0          |
| <i>CTIF</i>     | BA46   | 5.31E-08   | 0.000675 | 6.29E-07 | increasing     | 0          |
| <i>CTNNA2</i>   | BA46   | 1.74E-10   | -0.00076 | 6.35E-09 | decreasing     | 0          |

**Supplementary Table 9. Genes with a significant age effect from either ANOVA or linear regression. Beta is the regression coefficient, Pval is the p-value for the regression coefficient of expression on age (in days). Effect category is increasing if beta is positive and significant, decreasing if beta is negative and significant, and other if the ANOVA were significant rather than the linear regression. Local eQTL is 1 if the gene had a significant local eQTL**

| Gene            | Tissue | Anova.pval | Beta     | Pval     | EffectCategory | Local eQTL |
|-----------------|--------|------------|----------|----------|----------------|------------|
| <i>CTNNA3</i>   | BA46   | 9.41E-12   | 0.000815 | 1.95E-11 | increasing     | 0          |
| <i>CTNNBIP1</i> | BA46   | 2.39E-11   | -0.00083 | 4.33E-11 | decreasing     | 0          |
| <i>CTSB</i>     | BA46   | 1.21E-07   | -0.00064 | 3.92E-06 | decreasing     | 0          |
| <i>CTSV</i>     | BA46   | 7.07E-06   | -0.00068 | 2.54E-07 | decreasing     | 0          |
| <i>CTXN2</i>    | BA46   | 4.72E-09   | 0.000744 | 7.65E-09 | increasing     | 0          |
| <i>CTXN3</i>    | BA46   | 2.94E-09   | 0.00046  | 0.001537 | other          | 0          |
| <i>CUX2</i>     | BA46   | 6.41E-06   | -0.00071 | 1.19E-07 | decreasing     | 0          |
| <i>CWF19L2</i>  | BA46   | 5.28E-14   | 0.000874 | 6.79E-13 | increasing     | 0          |
| <i>CX3CL1</i>   | BA46   | 3.13E-12   | -0.00084 | 4.75E-11 | decreasing     | 0          |
| <i>CX3CR1</i>   | BA46   | 1.38E-06   | -0.00073 | 7.85E-08 | decreasing     | 0          |
| <i>CXADR</i>    | BA46   | 1.03E-12   | -0.00079 | 6.17E-10 | decreasing     | 0          |
| <i>CXCL12</i>   | BA46   | 8.86E-14   | -0.00085 | 2.07E-11 | decreasing     | 0          |
| <i>CXCL14</i>   | BA46   | 1.57E-07   | -0.00071 | 9.01E-08 | decreasing     | 0          |
| <i>CYFIP1</i>   | BA46   | 8.04E-13   | -0.0008  | 8.79E-11 | decreasing     | 1          |
| <i>CYGB</i>     | BA46   | 7.57E-10   | 0.000752 | 1.05E-08 | increasing     | 0          |
| <i>CYTH3</i>    | BA46   | 7.09E-11   | -0.00069 | 2.43E-07 | decreasing     | 0          |
| <i>CYTH4</i>    | BA46   | 9.42E-08   | -0.00075 | 1.39E-08 | decreasing     | 0          |
| <i>DAAM1</i>    | BA46   | 1.22E-07   | -0.00057 | 3.55E-05 | decreasing     | 0          |
| <i>DAB1</i>     | BA46   | 7.02E-10   | -0.00082 | 9.15E-11 | decreasing     | 0          |
| <i>DAB2IP</i>   | BA46   | 7.57E-08   | -0.00076 | 1.05E-08 | decreasing     | 0          |
| <i>DACT2</i>    | BA46   | 8.18E-12   | 0.000751 | 8.17E-09 | increasing     | 1          |
| <i>DACT3</i>    | BA46   | 1.91E-07   | -0.00072 | 8.56E-08 | decreasing     | 0          |
| <i>DAGLB</i>    | BA46   | 7.37E-12   | 0.000839 | 9.55E-12 | increasing     | 0          |
| <i>DCAF7</i>    | BA46   | 8.27E-08   | -0.00079 | 1.88E-09 | decreasing     | 0          |
| <i>DCAF8</i>    | BA46   | 7.52E-09   | 0.000779 | 1.02E-09 | increasing     | 0          |
| <i>DCLK1</i>    | BA46   | 1.96E-10   | -0.00072 | 7.03E-08 | decreasing     | 0          |
| <i>DCLK3</i>    | BA46   | 7.26E-12   | -0.00077 | 2.92E-09 | decreasing     | 0          |
| <i>DCUN1D5</i>  | BA46   | 3.36E-08   | -0.00063 | 5.57E-06 | decreasing     | 0          |
| <i>DCX</i>      | BA46   | 6.97E-08   | -0.00051 | 0.000235 | other          | 0          |
| <i>DDN</i>      | BA46   | 2.69E-09   | -0.00046 | 0.001313 | other          | 0          |
| <i>DDOST</i>    | BA46   | 9.54E-08   | -0.0001  | 0.493878 | other          | 0          |
| <i>DDRKG1</i>   | BA46   | 9.18E-10   | 0.000249 | 0.093878 | other          | 0          |
| <i>DDX21</i>    | BA46   | 3.38E-08   | -0.00066 | 9.87E-07 | decreasing     | 0          |
| <i>DDX24</i>    | BA46   | 3.31E-09   | 0.000786 | 1.19E-09 | increasing     | 0          |
| <i>DEPDC5</i>   | BA46   | 1.33E-10   | 0.000804 | 4.74E-10 | increasing     | 0          |
| <i>DESI1</i>    | BA46   | 2.31E-07   | -0.00073 | 5.75E-08 | decreasing     | 0          |
| <i>DFNA5</i>    | BA46   | 2.61E-06   | -0.00069 | 8.92E-08 | decreasing     | 0          |
| <i>DGCR2</i>    | BA46   | 2.07E-06   | 0.000713 | 1.26E-07 | increasing     | 0          |
| <i>DGKA</i>     | BA46   | 2.76E-13   | 0.000849 | 7.42E-12 | increasing     | 0          |
| <i>DGKB</i>     | BA46   | 1.19E-12   | 0.000259 | 0.076945 | other          | 0          |

**Supplementary Table 9. Genes with a significant age effect from either ANOVA or linear regression. Beta is the regression coefficient, Pval is the p-value for the regression coefficient of expression on age (in days). Effect category is increasing if beta is positive and significant, decreasing if beta is negative and significant, and other if the ANOVA were significant rather than the linear regression. Local eQTL is 1 if the gene had a significant local eQTL**

| Gene           | Tissue | Anova.pval | Beta      | Pval     | EffectCategory | Local eQTL |
|----------------|--------|------------|-----------|----------|----------------|------------|
| <i>DGKD</i>    | BA46   | 4.07E-19   | -0.00084  | 1.56E-12 | decreasing     | 0          |
| <i>DGKI</i>    | BA46   | 8.64E-09   | -8.47E-06 | 0.955536 | other          | 0          |
| <i>DGKZ</i>    | BA46   | 1.66E-08   | -0.00032  | 0.026718 | other          | 0          |
| <i>DHDH</i>    | BA46   | 2.84E-08   | 0.00075   | 2.75E-09 | increasing     | 0          |
| <i>DHRS7C</i>  | BA46   | 3.11E-06   | 0.000761  | 1.25E-08 | increasing     | 0          |
| <i>DIO2</i>    | BA46   | 2.48E-16   | -0.00091  | 8.68E-14 | decreasing     | 0          |
| <i>DKK3</i>    | BA46   | 1.54E-09   | 0.000812  | 4.75E-10 | increasing     | 0          |
| <i>DLG2</i>    | BA46   | 1.47E-12   | -0.00086  | 6.66E-12 | decreasing     | 0          |
| <i>DMD</i>     | BA46   | 3.46E-08   | -9.26E-05 | 0.535304 | other          | 0          |
| <i>DMKN</i>    | BA46   | 4.10E-09   | 0.000737  | 5.77E-09 | increasing     | 0          |
| <i>DNAH11</i>  | BA46   | 2.23E-08   | -0.00065  | 1.13E-06 | decreasing     | 0          |
| <i>DNAJA4</i>  | BA46   | 1.89E-10   | 0.000837  | 7.39E-11 | increasing     | 0          |
| <i>DNAJB5</i>  | BA46   | 1.29E-13   | -0.00086  | 6.33E-13 | decreasing     | 0          |
| <i>DNAJC21</i> | BA46   | 3.54E-09   | 0.000662  | 1.04E-06 | increasing     | 0          |
| <i>DNAL1</i>   | BA46   | 4.71E-12   | -0.00085  | 1.05E-11 | decreasing     | 0          |
| <i>DNER</i>    | BA46   | 6.91E-10   | -0.00057  | 4.49E-05 | decreasing     | 0          |
| <i>DNM1</i>    | BA46   | 9.77E-09   | 0.00068   | 4.30E-07 | increasing     | 0          |
| <i>DNM3</i>    | BA46   | 1.22E-06   | 0.000729  | 3.15E-08 | increasing     | 0          |
| <i>DNMBP</i>   | BA46   | 1.03E-07   | 0.00056   | 4.01E-05 | increasing     | 0          |
| <i>DOC2A</i>   | BA46   | 1.20E-08   | 0.000764  | 9.27E-09 | increasing     | 0          |
| <i>DOCK5</i>   | BA46   | 3.34E-10   | 0.000776  | 8.67E-10 | increasing     | 0          |
| <i>DOCK9</i>   | BA46   | 3.31E-17   | -0.00086  | 2.69E-13 | decreasing     | 0          |
| <i>DOK4</i>    | BA46   | 1.47E-09   | -0.00067  | 3.87E-07 | decreasing     | 0          |
| <i>DOK5</i>    | BA46   | 4.31E-12   | -0.00077  | 1.17E-09 | decreasing     | 0          |
| <i>DPF2</i>    | BA46   | 3.72E-06   | 0.000725  | 9.51E-08 | increasing     | 0          |
| <i>DPYS</i>    | BA46   | 5.72E-10   | 0.000744  | 1.47E-08 | increasing     | 0          |
| <i>DPYSL3</i>  | BA46   | 7.08E-19   | -0.00089  | 3.74E-14 | decreasing     | 0          |
| <i>DPYSL5</i>  | BA46   | 9.44E-16   | -0.00087  | 4.52E-13 | decreasing     | 0          |
| <i>DRAXIN</i>  | BA46   | 1.49E-07   | -0.00051  | 0.000287 | other          | 0          |
| <i>DRD2</i>    | BA46   | 3.12E-06   | -0.00072  | 8.53E-08 | decreasing     | 0          |
| <i>DSG3</i>    | BA46   | 5.81E-08   | -0.00063  | 4.32E-06 | decreasing     | 1          |
| <i>DSTYK</i>   | BA46   | 4.14E-07   | 0.000737  | 3.49E-08 | increasing     | 0          |
| <i>DTNA</i>    | BA46   | 7.49E-08   | -0.00045  | 0.001532 | other          | 0          |
| <i>DTX4</i>    | BA46   | 1.86E-14   | -0.00085  | 2.36E-12 | decreasing     | 0          |
| <i>DUSP16</i>  | BA46   | 1.03E-09   | 0.000518  | 0.000175 | other          | 0          |
| <i>DUSP18</i>  | BA46   | 3.44E-06   | -0.00072  | 5.25E-08 | decreasing     | 1          |
| <i>DUSP7</i>   | BA46   | 2.71E-06   | -0.00074  | 3.31E-08 | decreasing     | 0          |
| <i>DYRK2</i>   | BA46   | 8.61E-15   | -0.00085  | 5.06E-12 | decreasing     | 0          |
| <i>DYRK3</i>   | BA46   | 7.48E-13   | -0.00082  | 5.04E-11 | decreasing     | 0          |
| <i>EEF2</i>    | BA46   | 3.08E-07   | -0.00078  | 3.26E-09 | decreasing     | 0          |

**Supplementary Table 9. Genes with a significant age effect from either ANOVA or linear regression. Beta is the regression coefficient, Pval is the p-value for the regression coefficient of expression on age (in days). Effect category is increasing if beta is positive and significant, decreasing if beta is negative and significant, and other if the ANOVA were significant rather than the linear regression. Local eQTL is 1 if the gene had a significant local eQTL**

| Gene            | Tissue | Anova.pval | Beta      | Pval     | EffectCategory | Local eQTL |
|-----------------|--------|------------|-----------|----------|----------------|------------|
| <i>EFHD2</i>    | BA46   | 2.53E-19   | 0.000901  | 1.72E-14 | increasing     | 0          |
| <i>EFNA5</i>    | BA46   | 7.70E-06   | -0.00072  | 1.22E-07 | decreasing     | 0          |
| <i>EHD3</i>     | BA46   | 5.02E-10   | 0.000694  | 2.08E-07 | increasing     | 0          |
| <i>EIF4A1</i>   | BA46   | 1.80E-07   | -0.00035  | 0.015972 | other          | 0          |
| <i>EIF4B</i>    | BA46   | 1.45E-08   | 0.000673  | 1.22E-06 | increasing     | 0          |
| <i>ELK1</i>     | BA46   | 1.97E-08   | 0.000655  | 1.26E-06 | increasing     | 0          |
| <i>ELMO1</i>    | BA46   | 9.13E-09   | 0.000493  | 0.00046  | other          | 0          |
| <i>EMCN</i>     | BA46   | 1.12E-08   | -0.00076  | 1.75E-08 | decreasing     | 0          |
| <i>EMILIN3</i>  | BA46   | 8.54E-17   | 0.000875  | 3.03E-13 | increasing     | 0          |
| <i>EML2</i>     | BA46   | 1.62E-07   | 0.000785  | 1.42E-09 | increasing     | 0          |
| <i>EML4</i>     | BA46   | 1.87E-07   | -0.00011  | 0.458111 | other          | 0          |
| <i>EML6</i>     | BA46   | 1.19E-07   | 0.000217  | 0.139402 | other          | 0          |
| <i>ENAH</i>     | BA46   | 5.04E-12   | -0.00083  | 1.13E-10 | decreasing     | 0          |
| <i>ENDOD1</i>   | BA46   | 1.13E-09   | 0.000806  | 2.43E-10 | increasing     | 0          |
| <i>ENOX1</i>    | BA46   | 1.32E-12   | -0.00077  | 1.68E-09 | decreasing     | 0          |
| <i>ENPP2</i>    | BA46   | 5.88E-11   | 0.000804  | 1.10E-10 | increasing     | 0          |
| <i>ENTPD3</i>   | BA46   | 6.62E-07   | 0.000757  | 1.43E-08 | increasing     | 0          |
| <i>EPAS1</i>    | BA46   | 6.15E-09   | -0.00055  | 6.82E-05 | decreasing     | 0          |
| <i>EPB41</i>    | BA46   | 2.35E-13   | 0.00083   | 1.26E-11 | increasing     | 0          |
| <i>EPB41L2</i>  | BA46   | 1.15E-10   | -1.54E-05 | 0.917516 | other          | 0          |
| <i>EPB41L4B</i> | BA46   | 1.68E-07   | 0.000121  | 0.40714  | other          | 0          |
| <i>EPDR1</i>    | BA46   | 1.51E-10   | 0.000675  | 3.74E-07 | increasing     | 0          |
| <i>EPHA5</i>    | BA46   | 1.31E-13   | -0.00085  | 7.28E-12 | decreasing     | 0          |
| <i>EPHA6</i>    | BA46   | 1.43E-06   | -0.00072  | 6.52E-08 | decreasing     | 0          |
| <i>EPHB1</i>    | BA46   | 5.73E-06   | -0.00071  | 1.82E-07 | decreasing     | 0          |
| <i>EPHB2</i>    | BA46   | 2.46E-12   | -0.00082  | 7.38E-11 | decreasing     | 0          |
| <i>EPHB3</i>    | BA46   | 2.41E-07   | -0.00076  | 1.40E-08 | decreasing     | 0          |
| <i>EPHB6</i>    | BA46   | 1.41E-09   | 0.000738  | 2.45E-08 | increasing     | 0          |
| <i>EPHX4</i>    | BA46   | 2.00E-07   | 0.000706  | 7.23E-08 | increasing     | 0          |
| <i>EPM2A</i>    | BA46   | 6.41E-06   | 0.000735  | 2.91E-08 | increasing     | 0          |
| <i>EPN2</i>     | BA46   | 1.69E-08   | -0.00077  | 6.97E-09 | decreasing     | 0          |
| <i>EPN3</i>     | BA46   | 1.10E-15   | 0.00088   | 5.64E-13 | increasing     | 0          |
| <i>EPX</i>      | BA46   | 1.50E-07   | 0.000457  | 0.001925 | other          | 0          |
| <i>ERGIC1</i>   | BA46   | 7.95E-13   | -0.00087  | 2.36E-12 | decreasing     | 0          |
| <i>ERMN</i>     | BA46   | 1.32E-13   | 0.00083   | 7.13E-12 | increasing     | 0          |
| <i>ERMP1</i>    | BA46   | 5.59E-06   | 0.000686  | 2.19E-07 | increasing     | 0          |
| <i>ESYT3</i>    | BA46   | 1.32E-12   | 0.0008    | 3.69E-10 | increasing     | 0          |
| <i>ETNK2</i>    | BA46   | 5.07E-06   | -0.00076  | 9.04E-09 | decreasing     | 0          |
| <i>ETNPPL</i>   | BA46   | 2.98E-08   | 0.000531  | 0.00014  | other          | 0          |
| <i>ETS1</i>     | BA46   | 2.21E-10   | -0.00075  | 1.77E-08 | decreasing     | 0          |



**Supplementary Table 9. Genes with a significant age effect from either ANOVA or linear regression. Beta is the regression coefficient, Pval is the p-value for the regression coefficient of expression on age (in days). Effect category is increasing if beta is positive and significant, decreasing if beta is negative and significant, and other if the ANOVA were significant rather than the linear regression. Local eQTL is 1 if the gene had a significant local eQTL**

| Gene            | Tissue | Anova.pval | Beta     | Pval     | EffectCategory | Local eQTL |
|-----------------|--------|------------|----------|----------|----------------|------------|
| <i>ETS2</i>     | BA46   | 6.77E-15   | 0.000858 | 1.70E-12 | increasing     | 0          |
| <i>ETV4</i>     | BA46   | 7.60E-09   | -0.00079 | 2.14E-09 | decreasing     | 0          |
| <i>EVL</i>      | BA46   | 6.54E-11   | -0.00083 | 1.56E-11 | decreasing     | 0          |
| <i>EXPH5</i>    | BA46   | 1.75E-09   | -0.00043 | 0.00285  | other          | 0          |
| <i>EXT1</i>     | BA46   | 1.23E-10   | -0.00076 | 4.58E-09 | decreasing     | 0          |
| <i>EXTL2</i>    | BA46   | 2.00E-07   | 0.00039  | 0.008039 | other          | 0          |
| <i>EZH1</i>     | BA46   | 3.11E-17   | 0.000883 | 6.84E-14 | increasing     | 0          |
| <i>EZR</i>      | BA46   | 5.23E-08   | -0.00074 | 2.67E-08 | decreasing     | 0          |
| <i>FABP3</i>    | BA46   | 3.72E-08   | -0.00048 | 0.000793 | other          | 0          |
| <i>FAIM3</i>    | BA46   | 6.81E-05   | -0.00071 | 2.19E-07 | decreasing     | 0          |
| <i>FAM102B</i>  | BA46   | 3.01E-13   | -0.00083 | 2.63E-11 | decreasing     | 0          |
| <i>FAM110B</i>  | BA46   | 5.01E-09   | -0.00032 | 0.027889 | other          | 0          |
| <i>FAM110C</i>  | BA46   | 2.32E-08   | 0.000651 | 1.74E-06 | increasing     | 0          |
| <i>FAM115A</i>  | BA46   | 1.17E-08   | 0.000765 | 8.75E-09 | increasing     | 0          |
| <i>FAM117A</i>  | BA46   | 2.35E-07   | 0.000591 | 2.39E-05 | increasing     | 0          |
| <i>FAM131B</i>  | BA46   | 3.92E-09   | 0.000761 | 1.02E-08 | increasing     | 0          |
| <i>FAM132A</i>  | BA46   | 2.10E-08   | 0.00058  | 3.99E-05 | increasing     | 0          |
| <i>FAM133B</i>  | BA46   | 5.59E-06   | 0.000701 | 2.46E-07 | increasing     | 0          |
| <i>FAM13A</i>   | BA46   | 6.60E-07   | 0.000735 | 3.61E-08 | increasing     | 0          |
| <i>FAM155B</i>  | BA46   | 2.77E-08   | -0.0008  | 6.56E-10 | decreasing     | 0          |
| <i>FAM159B</i>  | BA46   | 2.24E-08   | -0.00058 | 2.99E-05 | decreasing     | 0          |
| <i>FAM171A1</i> | BA46   | 3.30E-11   | 0.000847 | 3.16E-11 | increasing     | 0          |
| <i>FAM172A</i>  | BA46   | 1.43E-07   | -0.00064 | 4.75E-06 | decreasing     | 0          |
| <i>FAM177A1</i> | BA46   | 2.31E-07   | -0.00065 | 3.25E-06 | decreasing     | 0          |
| <i>FAM184A</i>  | BA46   | 2.89E-09   | -0.0007  | 1.27E-07 | decreasing     | 0          |
| <i>FAM189B</i>  | BA46   | 9.60E-06   | 0.000698 | 1.73E-07 | increasing     | 0          |
| <i>FAM195B</i>  | BA46   | 2.46E-07   | -0.00072 | 6.43E-08 | decreasing     | 0          |
| <i>FAM196A</i>  | BA46   | 7.60E-08   | -0.00028 | 0.055028 | other          | 1          |
| <i>FAM19A1</i>  | BA46   | 7.42E-13   | -0.0008  | 4.12E-10 | decreasing     | 0          |
| <i>FAM207A</i>  | BA46   | 5.04E-08   | 0.000448 | 0.001777 | other          | 0          |
| <i>FAM210B</i>  | BA46   | 2.36E-07   | 5.79E-05 | 0.692882 | other          | 0          |
| <i>FAM212B</i>  | BA46   | 1.61E-07   | -0.00064 | 5.74E-06 | decreasing     | 0          |
| <i>FAM213A</i>  | BA46   | 1.07E-12   | 0.000789 | 6.62E-10 | increasing     | 0          |
| <i>FAM53B</i>   | BA46   | 1.53E-08   | 0.00068  | 4.76E-07 | increasing     | 0          |
| <i>FAM57B</i>   | BA46   | 2.32E-07   | -0.00075 | 1.21E-08 | decreasing     | 0          |
| <i>FAM65B</i>   | BA46   | 1.68E-14   | -0.0008  | 1.39E-10 | decreasing     | 0          |
| <i>FAM78A</i>   | BA46   | 7.03E-08   | 0.000296 | 0.045238 | other          | 0          |
| <i>FAM81A</i>   | BA46   | 4.26E-10   | 0.000318 | 0.026962 | other          | 0          |
| <i>FAM84B</i>   | BA46   | 3.29E-08   | -0.00069 | 2.52E-07 | decreasing     | 0          |
| <i>FARP1</i>    | BA46   | 1.94E-09   | -0.00067 | 5.83E-07 | decreasing     | 0          |

**Supplementary Table 9. Genes with a significant age effect from either ANOVA or linear regression. Beta is the regression coefficient, Pval is the p-value for the regression coefficient of expression on age (in days). Effect category is increasing if beta is positive and significant, decreasing if beta is negative and significant, and other if the ANOVA were significant rather than the linear regression. Local eQTL is 1 if the gene had a significant local eQTL**

| Gene           | Tissue | Anova.pval | Beta      | Pval     | EffectCategory | Local eQTL |
|----------------|--------|------------|-----------|----------|----------------|------------|
| <i>FARP2</i>   | BA46   | 1.51E-10   | -2.44E-05 | 0.869422 | other          | 0          |
| <i>FAT4</i>    | BA46   | 9.61E-08   | -0.00025  | 0.087362 | other          | 0          |
| <i>FBLIM1</i>  | BA46   | 9.79E-08   | -0.00065  | 1.50E-06 | decreasing     | 1          |
| <i>FBXO10</i>  | BA46   | 2.50E-12   | -0.00079  | 1.35E-09 | decreasing     | 0          |
| <i>FBXO2</i>   | BA46   | 5.17E-09   | 0.000573  | 4.06E-05 | increasing     | 1          |
| <i>FBXO21</i>  | BA46   | 3.00E-08   | 0.000689  | 5.81E-07 | increasing     | 0          |
| <i>FBXO33</i>  | BA46   | 2.69E-09   | 0.000816  | 4.10E-11 | increasing     | 0          |
| <i>FCN3</i>    | BA46   | 2.59E-10   | 0.000138  | 0.346092 | other          | 0          |
| <i>FEM1C</i>   | BA46   | 3.61E-13   | 0.000797  | 3.77E-10 | increasing     | 1          |
| <i>FERD3L</i>  | BA46   | 1.91E-13   | 0.000829  | 8.38E-11 | increasing     | 0          |
| <i>FGD3</i>    | BA46   | 8.54E-14   | -0.00081  | 6.69E-11 | decreasing     | 0          |
| <i>FGD4</i>    | BA46   | 1.11E-08   | -0.00067  | 6.34E-07 | decreasing     | 0          |
| <i>FGF1</i>    | BA46   | 6.58E-09   | 0.000632  | 2.84E-06 | increasing     | 0          |
| <i>FGF11</i>   | BA46   | 1.48E-13   | -0.00086  | 3.32E-12 | decreasing     | 0          |
| <i>FGF13</i>   | BA46   | 2.38E-10   | -0.00084  | 6.88E-11 | decreasing     | 0          |
| <i>FHL1</i>    | BA46   | 1.83E-08   | 0.000177  | 0.229503 | other          | 0          |
| <i>FIBCD1</i>  | BA46   | 2.71E-08   | -0.00033  | 0.02136  | other          | 0          |
| <i>FJX1</i>    | BA46   | 4.09E-08   | -0.00067  | 6.25E-07 | decreasing     | 0          |
| <i>FKBP1B</i>  | BA46   | 1.38E-07   | -0.00064  | 2.53E-06 | decreasing     | 0          |
| <i>FLYWCH1</i> | BA46   | 1.45E-08   | 0.00076   | 3.91E-09 | increasing     | 0          |
| <i>FMNL1</i>   | BA46   | 1.40E-09   | -0.00071  | 1.59E-07 | decreasing     | 0          |
| <i>FNBP1L</i>  | BA46   | 8.47E-11   | -0.00075  | 2.25E-09 | decreasing     | 0          |
| <i>FNDC4</i>   | BA46   | 1.45E-11   | 0.000724  | 4.26E-08 | increasing     | 0          |
| <i>FOSB</i>    | BA46   | 1.52E-09   | 0.000589  | 2.70E-05 | increasing     | 0          |
| <i>FOXI3</i>   | BA46   | 4.17E-10   | -0.00077  | 3.27E-10 | decreasing     | 0          |
| <i>FOXO3</i>   | BA46   | 1.85E-08   | 0.000717  | 6.16E-08 | increasing     | 0          |
| <i>FOXO6</i>   | BA46   | 1.15E-09   | -0.00075  | 4.01E-09 | decreasing     | 0          |
| <i>FOXP1</i>   | BA46   | 2.39E-07   | -0.00046  | 0.001458 | other          | 0          |
| <i>FREM3</i>   | BA46   | 2.98E-10   | 0.000147  | 0.31413  | other          | 0          |
| <i>FRMD3</i>   | BA46   | 4.11E-11   | -0.00061  | 8.91E-06 | decreasing     | 0          |
| <i>FRMD4A</i>  | BA46   | 3.46E-10   | -0.00079  | 4.10E-10 | decreasing     | 0          |
| <i>FSTL5</i>   | BA46   | 1.01E-09   | -0.0007   | 1.58E-07 | decreasing     | 0          |
| <i>FUT8</i>    | BA46   | 7.33E-13   | -0.00083  | 1.18E-11 | decreasing     | 0          |
| <i>FZD7</i>    | BA46   | 5.52E-06   | 0.000696  | 1.27E-07 | increasing     | 0          |
| <i>GAB1</i>    | BA46   | 1.48E-09   | 0.000786  | 6.63E-10 | increasing     | 0          |
| <i>GABPB2</i>  | BA46   | 9.18E-08   | 0.000775  | 2.17E-09 | increasing     | 0          |
| <i>GABRA2</i>  | BA46   | 9.19E-08   | -0.00068  | 8.62E-07 | decreasing     | 0          |
| <i>GABRA5</i>  | BA46   | 9.82E-13   | -0.00079  | 7.95E-10 | decreasing     | 0          |
| <i>GABRB1</i>  | BA46   | 1.05E-07   | -0.0005   | 0.000456 | other          | 0          |
| <i>GABRG2</i>  | BA46   | 3.76E-08   | 0.000749  | 2.04E-08 | increasing     | 0          |

**Supplementary Table 9. Genes with a significant age effect from either ANOVA or linear regression. Beta is the regression coefficient, Pval is the p-value for the regression coefficient of expression on age (in days). Effect category is increasing if beta is positive and significant, decreasing if beta is negative and significant, and other if the ANOVA were significant rather than the linear regression. Local eQTL is 1 if the gene had a significant local eQTL**

| Gene           | Tissue | Anova.pval | Beta      | Pval     | EffectCategory | Local eQTL |
|----------------|--------|------------|-----------|----------|----------------|------------|
| <i>GAL3ST2</i> | BA46   | 5.84E-07   | 0.000754  | 1.02E-08 | increasing     | 0          |
| <i>GALNS</i>   | BA46   | 2.92E-08   | 0.000116  | 0.442777 | other          | 0          |
| <i>GALNT13</i> | BA46   | 5.22E-08   | -0.00014  | 0.359876 | other          | 0          |
| <i>GALNT14</i> | BA46   | 6.58E-08   | -0.00079  | 1.26E-09 | decreasing     | 0          |
| <i>GALNT5</i>  | BA46   | 6.63E-10   | 0.000809  | 1.68E-10 | increasing     | 0          |
| <i>GALNT9</i>  | BA46   | 1.07E-07   | -0.00027  | 0.064127 | other          | 0          |
| <i>GALT</i>    | BA46   | 1.42E-07   | -0.0006   | 7.99E-06 | decreasing     | 0          |
| <i>GAS2L3</i>  | BA46   | 6.42E-08   | -0.00063  | 5.80E-06 | decreasing     | 0          |
| <i>GATA4</i>   | BA46   | 1.15E-08   | -0.00012  | 0.418909 | other          | 0          |
| <i>GBGT1</i>   | BA46   | 2.34E-08   | 0.000663  | 1.10E-06 | increasing     | 0          |
| <i>GCNT4</i>   | BA46   | 1.53E-08   | 0.000492  | 0.000389 | other          | 0          |
| <i>GDAP2</i>   | BA46   | 4.46E-10   | 0.000688  | 2.97E-07 | increasing     | 0          |
| <i>GDF10</i>   | BA46   | 5.47E-09   | -0.0003   | 0.042336 | other          | 0          |
| <i>GFOD1</i>   | BA46   | 4.33E-10   | 0.000788  | 5.51E-10 | increasing     | 0          |
| <i>GFPT1</i>   | BA46   | 2.90E-08   | -0.00062  | 7.38E-06 | decreasing     | 0          |
| <i>GGNBP2</i>  | BA46   | 1.92E-07   | 0.000766  | 4.45E-09 | increasing     | 0          |
| <i>GIGYF1</i>  | BA46   | 4.30E-06   | 0.000717  | 9.91E-08 | increasing     | 0          |
| <i>GJA3</i>    | BA46   | 9.92E-09   | -0.00041  | 0.004678 | other          | 0          |
| <i>GJB1</i>    | BA46   | 1.33E-10   | 0.00075   | 5.08E-09 | increasing     | 0          |
| <i>GJB5</i>    | BA46   | 1.45E-09   | -4.80E-05 | 0.748395 | other          | 0          |
| <i>GJC1</i>    | BA46   | 1.57E-09   | -0.00067  | 3.68E-07 | decreasing     | 0          |
| <i>GLCC1</i>   | BA46   | 5.06E-06   | 0.000698  | 2.40E-07 | increasing     | 0          |
| <i>GLDC</i>    | BA46   | 7.67E-08   | -0.00047  | 0.0011   | other          | 0          |
| <i>GLP2R</i>   | BA46   | 1.04E-18   | 0.00085   | 6.31E-12 | increasing     | 0          |
| <i>GLS</i>     | BA46   | 2.23E-07   | 0.000611  | 8.41E-06 | increasing     | 0          |
| <i>GLYR1</i>   | BA46   | 5.20E-08   | -0.0005   | 0.000389 | other          | 0          |
| <i>GMIP</i>    | BA46   | 1.45E-13   | 0.000861  | 5.22E-12 | increasing     | 0          |
| <i>GNA14</i>   | BA46   | 4.03E-12   | 0.000699  | 1.07E-07 | increasing     | 0          |
| <i>GNAQ</i>    | BA46   | 6.83E-09   | -0.00072  | 3.33E-08 | decreasing     | 0          |
| <i>GNAZ</i>    | BA46   | 3.37E-12   | -0.00084  | 9.61E-12 | decreasing     | 0          |
| <i>GNB4</i>    | BA46   | 2.17E-16   | -0.00088  | 8.82E-14 | decreasing     | 0          |
| <i>GNL1</i>    | BA46   | 5.46E-06   | 0.000705  | 1.68E-07 | increasing     | 0          |
| <i>GNPTAB</i>  | BA46   | 4.17E-18   | -0.0009   | 4.81E-14 | decreasing     | 0          |
| <i>GOT1</i>    | BA46   | 2.13E-08   | 0.000755  | 9.00E-09 | increasing     | 0          |
| <i>GP1BB</i>   | BA46   | 6.42E-09   | -0.00082  | 1.70E-10 | decreasing     | 0          |
| <i>GPC6</i>    | BA46   | 1.72E-07   | -0.00038  | 0.008613 | other          | 0          |
| <i>GPD1</i>    | BA46   | 3.14E-11   | -0.00078  | 7.88E-10 | decreasing     | 0          |
| <i>GPD2</i>    | BA46   | 2.83E-09   | -0.00075  | 2.29E-08 | decreasing     | 1          |
| <i>GPNMB</i>   | BA46   | 1.02E-07   | 0.000178  | 0.233707 | other          | 0          |
| <i>GPR116</i>  | BA46   | 2.15E-08   | -0.00077  | 8.40E-09 | decreasing     | 0          |

**Supplementary Table 9. Genes with a significant age effect from either ANOVA or linear regression. Beta is the regression coefficient, Pval is the p-value for the regression coefficient of expression on age (in days). Effect category is increasing if beta is positive and significant, decreasing if beta is negative and significant, and other if the ANOVA were significant rather than the linear regression. Local eQTL is 1 if the gene had a significant local eQTL**

| Gene           | Tissue | Anova.pval | Beta     | Pval     | EffectCategory | Local eQTL |
|----------------|--------|------------|----------|----------|----------------|------------|
| <i>GPR12</i>   | BA46   | 2.14E-09   | 0.000222 | 0.125701 | other          | 0          |
| <i>GPR155</i>  | BA46   | 1.74E-07   | 0.000738 | 1.55E-08 | increasing     | 0          |
| <i>GPR161</i>  | BA46   | 3.95E-08   | -0.00034 | 0.021873 | other          | 0          |
| <i>GPR17</i>   | BA46   | 4.57E-07   | -0.00075 | 2.28E-08 | decreasing     | 0          |
| <i>GPR21</i>   | BA46   | 1.48E-12   | -0.00075 | 7.03E-09 | decreasing     | 0          |
| <i>GPR26</i>   | BA46   | 5.81E-13   | -0.00085 | 2.16E-11 | decreasing     | 0          |
| <i>GPR37</i>   | BA46   | 1.98E-07   | 0.000553 | 6.63E-05 | increasing     | 0          |
| <i>GPR83</i>   | BA46   | 5.93E-14   | 0.000768 | 2.31E-09 | increasing     | 0          |
| <i>GPR88</i>   | BA46   | 3.24E-09   | 0.000171 | 0.253034 | other          | 0          |
| <i>GPRASP1</i> | BA46   | 1.06E-10   | 0.000847 | 3.13E-11 | increasing     | 0          |
| <i>GPRASP2</i> | BA46   | 1.61E-07   | 0.000674 | 1.17E-06 | increasing     | 0          |
| <i>GPRIN1</i>  | BA46   | 1.30E-07   | -0.00057 | 3.77E-05 | decreasing     | 0          |
| <i>GPX1</i>    | BA46   | 1.65E-06   | 0.000704 | 1.55E-07 | increasing     | 0          |
| <i>GRAMD4</i>  | BA46   | 3.63E-11   | -0.00079 | 1.30E-09 | decreasing     | 0          |
| <i>GRAP2</i>   | BA46   | 5.09E-08   | -0.00079 | 9.84E-10 | decreasing     | 0          |
| <i>GREB1</i>   | BA46   | 4.48E-08   | 0.00013  | 0.378179 | other          | 0          |
| <i>GREB1L</i>  | BA46   | 6.68E-07   | 0.00073  | 2.47E-08 | increasing     | 0          |
| <i>GRIA4</i>   | BA46   | 4.35E-08   | -0.00066 | 1.46E-06 | decreasing     | 0          |
| <i>GRID2</i>   | BA46   | 7.52E-09   | -0.00076 | 1.22E-08 | decreasing     | 0          |
| <i>GRIK1</i>   | BA46   | 5.73E-08   | -0.00074 | 3.37E-08 | decreasing     | 0          |
| <i>GRIK3</i>   | BA46   | 1.65E-09   | -0.00062 | 5.31E-06 | decreasing     | 0          |
| <i>GRIK4</i>   | BA46   | 3.36E-08   | -0.00054 | 0.000205 | other          | 0          |
| <i>GRIN2A</i>  | BA46   | 7.13E-08   | -0.00072 | 1.46E-07 | decreasing     | 0          |
| <i>GRIN2B</i>  | BA46   | 5.46E-11   | -0.00078 | 1.29E-09 | decreasing     | 0          |
| <i>GRIN3A</i>  | BA46   | 4.69E-12   | -0.00078 | 8.31E-10 | decreasing     | 0          |
| <i>GRIP1</i>   | BA46   | 2.34E-07   | -0.00032 | 0.031353 | other          | 0          |
| <i>GRM1</i>    | BA46   | 1.67E-07   | 0.000701 | 2.36E-07 | increasing     | 1          |
| <i>GRM2</i>    | BA46   | 7.31E-08   | -0.00038 | 0.010364 | other          | 0          |
| <i>GRM3</i>    | BA46   | 2.60E-07   | -0.0008  | 1.21E-09 | decreasing     | 0          |
| <i>GRM5</i>    | BA46   | 2.05E-07   | -0.00049 | 0.000581 | other          | 0          |
| <i>GRM7</i>    | BA46   | 1.41E-13   | -0.00085 | 4.94E-13 | decreasing     | 0          |
| <i>GRP</i>     | BA46   | 2.18E-14   | -0.00086 | 1.52E-12 | decreasing     | 1          |
| <i>GSE1</i>    | BA46   | 2.82E-09   | -0.00027 | 0.064563 | other          | 0          |
| <i>GSG1L</i>   | BA46   | 2.30E-08   | -0.00059 | 3.11E-05 | decreasing     | 0          |
| <i>GSKIP</i>   | BA46   | 1.31E-09   | 0.000582 | 1.69E-05 | increasing     | 0          |
| <i>GSTO1</i>   | BA46   | 4.12E-10   | 0.000784 | 5.01E-10 | increasing     | 0          |
| <i>GULP1</i>   | BA46   | 1.10E-11   | -0.00074 | 1.59E-08 | decreasing     | 0          |
| <i>GYG1</i>    | BA46   | 5.99E-06   | 0.000723 | 9.71E-08 | increasing     | 0          |
| <i>HABP4</i>   | BA46   | 1.78E-07   | 0.000335 | 0.021802 | other          | 0          |
| <i>HACL1</i>   | BA46   | 1.57E-07   | 0.000666 | 3.85E-07 | increasing     | 1          |

**Supplementary Table 9. Genes with a significant age effect from either ANOVA or linear regression. Beta is the regression coefficient, Pval is the p-value for the regression coefficient of expression on age (in days). Effect category is increasing if beta is positive and significant, decreasing if beta is negative and significant, and other if the ANOVA were significant rather than the linear regression. Local eQTL is 1 if the gene had a significant local eQTL**

| Gene            | Tissue | Anova.pval | Beta     | Pval     | EffectCategory | Local eQTL |
|-----------------|--------|------------|----------|----------|----------------|------------|
| <i>HAMP</i>     | BA46   | 2.24E-07   | 0.000641 | 1.32E-06 | increasing     | 0          |
| <i>HAPLN1</i>   | BA46   | 3.92E-20   | -0.0009  | 3.71E-14 | decreasing     | 0          |
| <i>HAPLN2</i>   | BA46   | 5.52E-13   | 0.000811 | 2.21E-10 | increasing     | 0          |
| <i>HAPLN4</i>   | BA46   | 8.03E-17   | 0.000883 | 1.96E-13 | increasing     | 0          |
| <i>HAS2</i>     | BA46   | 1.66E-10   | -0.00074 | 4.66E-09 | decreasing     | 0          |
| <i>HAUS5</i>    | BA46   | 9.81E-08   | 0.000764 | 8.79E-09 | increasing     | 0          |
| <i>HBP1</i>     | BA46   | 7.10E-05   | 0.000693 | 1.48E-07 | increasing     | 0          |
| <i>HCRTR1</i>   | BA46   | 1.65E-08   | -0.00074 | 3.87E-08 | decreasing     | 0          |
| <i>HDAC9</i>    | BA46   | 2.69E-10   | -0.0008  | 3.46E-10 | decreasing     | 0          |
| <i>HECTD2</i>   | BA46   | 3.94E-12   | -0.00079 | 1.77E-10 | decreasing     | 0          |
| <i>HECW2</i>    | BA46   | 1.04E-08   | -0.00073 | 2.99E-08 | decreasing     | 0          |
| <i>HES4</i>     | BA46   | 2.25E-08   | -0.00071 | 6.03E-08 | decreasing     | 0          |
| <i>HHIP</i>     | BA46   | 9.55E-14   | 0.000849 | 1.65E-11 | increasing     | 0          |
| <i>HIP1</i>     | BA46   | 4.06E-21   | -0.00092 | 2.65E-15 | decreasing     | 0          |
| <i>HIPK4</i>    | BA46   | 1.19E-10   | 0.000758 | 7.18E-09 | increasing     | 0          |
| <i>HIVEP2</i>   | BA46   | 4.42E-12   | -0.00085 | 1.03E-11 | decreasing     | 0          |
| <i>HIVEP3</i>   | BA46   | 1.19E-06   | -0.00075 | 1.31E-08 | decreasing     | 0          |
| <i>HLF</i>      | BA46   | 4.68E-08   | 0.000533 | 0.000128 | other          | 0          |
| <i>HMCN1</i>    | BA46   | 1.09E-07   | -0.00074 | 2.17E-08 | decreasing     | 0          |
| <i>HMGA2</i>    | BA46   | 6.80E-07   | -0.0007  | 1.85E-07 | decreasing     | 0          |
| <i>HMGB2</i>    | BA46   | 2.15E-06   | 0.000722 | 6.91E-08 | increasing     | 0          |
| <i>HMGR</i>     | BA46   | 8.22E-10   | -0.00072 | 5.59E-08 | decreasing     | 0          |
| <i>HN1</i>      | BA46   | 1.75E-07   | -0.00055 | 7.38E-05 | decreasing     | 0          |
| <i>HNRNPUL2</i> | BA46   | 1.02E-07   | 0.000587 | 2.39E-05 | increasing     | 0          |
| <i>HOMER1</i>   | BA46   | 1.04E-08   | -0.00054 | 0.000127 | other          | 0          |
| <i>HOMER2</i>   | BA46   | 4.72E-09   | -0.00078 | 2.59E-10 | decreasing     | 1          |
| <i>HOPX</i>     | BA46   | 1.09E-07   | 0.000697 | 1.85E-07 | increasing     | 0          |
| <i>HPCAL1</i>   | BA46   | 8.56E-08   | 0.000315 | 0.032199 | other          | 0          |
| <i>HPCAL4</i>   | BA46   | 7.91E-09   | 0.000185 | 0.20871  | other          | 0          |
| <i>HRH2</i>     | BA46   | 5.81E-08   | -0.0001  | 0.490604 | other          | 0          |
| <i>HS2ST1</i>   | BA46   | 1.97E-08   | -0.0008  | 8.67E-10 | decreasing     | 0          |
| <i>HSBP1</i>    | BA46   | 1.13E-08   | -0.00067 | 6.48E-07 | decreasing     | 0          |
| <i>HSD11B1</i>  | BA46   | 1.26E-06   | 0.000752 | 6.25E-09 | increasing     | 0          |
| <i>HSDL1</i>    | BA46   | 4.37E-08   | 0.000596 | 2.28E-05 | increasing     | 0          |
| <i>HSF4</i>     | BA46   | 6.10E-12   | 0.000824 | 2.11E-11 | increasing     | 0          |
| <i>HSPA1A</i>   | BA46   | 4.15E-08   | 0.000653 | 7.51E-07 | increasing     | 0          |
| <i>HSPA1B</i>   | BA46   | 4.80E-08   | 0.000679 | 3.86E-07 | increasing     | 0          |
| <i>HSPB8</i>    | BA46   | 2.40E-18   | 0.000883 | 3.61E-13 | increasing     | 0          |
| <i>HTR1A</i>    | BA46   | 1.10E-12   | 0.000749 | 2.13E-08 | increasing     | 0          |
| <i>HTR1E</i>    | BA46   | 3.18E-13   | 0.000791 | 4.62E-10 | increasing     | 0          |

**Supplementary Table 9. Genes with a significant age effect from either ANOVA or linear regression. Beta is the regression coefficient, Pval is the p-value for the regression coefficient of expression on age (in days). Effect category is increasing if beta is positive and significant, decreasing if beta is negative and significant, and other if the ANOVA were significant rather than the linear regression. Local eQTL is 1 if the gene had a significant local eQTL**

| Gene           | Tissue | Anova.pval | Beta     | Pval     | EffectCategory | Local eQTL |
|----------------|--------|------------|----------|----------|----------------|------------|
| <i>HTR3A</i>   | BA46   | 1.18E-09   | 0.000735 | 2.21E-08 | increasing     | 0          |
| <i>HTRA1</i>   | BA46   | 2.32E-06   | -0.00073 | 8.23E-08 | decreasing     | 0          |
| <i>HTRA3</i>   | BA46   | 2.28E-07   | -0.00045 | 0.001565 | other          | 0          |
| <i>HTRA4</i>   | BA46   | 8.71E-08   | 0.000757 | 7.66E-09 | increasing     | 0          |
| <i>IDH2</i>    | BA46   | 1.66E-07   | -0.00077 | 3.30E-09 | decreasing     | 0          |
| <i>IFFO1</i>   | BA46   | 9.31E-10   | 0.000763 | 2.21E-09 | increasing     | 0          |
| <i>IGF1</i>    | BA46   | 1.38E-10   | -0.00076 | 4.24E-09 | decreasing     | 0          |
| <i>IGF2BP2</i> | BA46   | 2.45E-08   | -0.00056 | 6.61E-05 | decreasing     | 0          |
| <i>IGF2R</i>   | BA46   | 5.68E-09   | -0.00017 | 0.248159 | other          | 0          |
| <i>IGFBP3</i>  | BA46   | 4.13E-08   | -0.0006  | 1.92E-05 | decreasing     | 0          |
| <i>IGFBPL1</i> | BA46   | 1.41E-07   | -0.00061 | 8.35E-06 | decreasing     | 0          |
| <i>IGSF3</i>   | BA46   | 7.79E-08   | 0.000135 | 0.360788 | other          | 0          |
| <i>IGSF8</i>   | BA46   | 3.89E-08   | 0.000709 | 6.03E-08 | increasing     | 0          |
| <i>IGSF9B</i>  | BA46   | 6.35E-08   | 0.000193 | 0.197559 | other          | 0          |
| <i>IL12RB2</i> | BA46   | 4.45E-08   | 4.56E-05 | 0.755999 | other          | 0          |
| <i>IL17D</i>   | BA46   | 1.77E-07   | 0.000402 | 0.005867 | other          | 0          |
| <i>IL17RD</i>  | BA46   | 2.61E-12   | -0.00083 | 1.37E-11 | decreasing     | 0          |
| <i>IL1RAP</i>  | BA46   | 8.35E-07   | -0.00071 | 8.54E-08 | decreasing     | 0          |
| <i>IL34</i>    | BA46   | 9.22E-10   | -0.00077 | 2.99E-09 | decreasing     | 0          |
| <i>ILDR2</i>   | BA46   | 6.78E-20   | -0.00089 | 1.17E-14 | decreasing     | 0          |
| <i>INPP5A</i>  | BA46   | 7.27E-18   | 0.000869 | 9.35E-14 | increasing     | 0          |
| <i>INPP5B</i>  | BA46   | 8.87E-12   | 0.000807 | 3.27E-10 | increasing     | 0          |
| <i>INPP5D</i>  | BA46   | 1.02E-08   | -0.00062 | 8.57E-06 | decreasing     | 0          |
| <i>INSM1</i>   | BA46   | 3.51E-08   | -0.00072 | 3.84E-08 | decreasing     | 0          |
| <i>IP6K2</i>   | BA46   | 2.49E-07   | 0.000104 | 0.476668 | other          | 0          |
| <i>IPMK</i>    | BA46   | 2.11E-08   | -0.00081 | 4.86E-10 | decreasing     | 0          |
| <i>IPO11</i>   | BA46   | 2.25E-07   | 0.000635 | 2.49E-06 | increasing     | 0          |
| <i>IQGAP2</i>  | BA46   | 1.46E-08   | -0.00066 | 1.18E-06 | decreasing     | 0          |
| <i>IRF2</i>    | BA46   | 7.04E-12   | 0.000827 | 2.69E-11 | increasing     | 0          |
| <i>IRF5</i>    | BA46   | 6.70E-11   | 0.000833 | 5.10E-11 | increasing     | 0          |
| <i>IRF8</i>    | BA46   | 7.24E-08   | -0.00071 | 1.88E-07 | decreasing     | 0          |
| <i>IRS2</i>    | BA46   | 1.90E-07   | 0.000677 | 3.41E-07 | increasing     | 0          |
| <i>ISCU</i>    | BA46   | 1.83E-15   | 0.000852 | 1.75E-12 | increasing     | 0          |
| <i>ITGA1</i>   | BA46   | 6.52E-08   | -0.00073 | 8.44E-08 | decreasing     | 0          |
| <i>ITGA2B</i>  | BA46   | 8.10E-11   | -0.00063 | 6.12E-06 | decreasing     | 0          |
| <i>ITGA3</i>   | BA46   | 1.81E-16   | 0.000886 | 2.11E-13 | increasing     | 0          |
| <i>ITGA4</i>   | BA46   | 1.62E-07   | 0.000435 | 0.001976 | other          | 0          |
| <i>ITGA9</i>   | BA46   | 1.76E-12   | -0.0008  | 1.76E-10 | decreasing     | 0          |
| <i>ITGAM</i>   | BA46   | 3.96E-06   | -0.00073 | 8.81E-08 | decreasing     | 0          |
| <i>ITPKB</i>   | BA46   | 1.19E-07   | 0.000625 | 4.74E-06 | increasing     | 0          |

**Supplementary Table 9. Genes with a significant age effect from either ANOVA or linear regression. Beta is the regression coefficient, Pval is the p-value for the regression coefficient of expression on age (in days). Effect category is increasing if beta is positive and significant, decreasing if beta is negative and significant, and other if the ANOVA were significant rather than the linear regression. Local eQTL is 1 if the gene had a significant local eQTL**

| Gene            | Tissue | Anova.pval | Beta      | Pval     | EffectCategory | Local eQTL |
|-----------------|--------|------------|-----------|----------|----------------|------------|
| <i>ITPR1</i>    | BA46   | 1.39E-16   | 0.000694  | 1.44E-07 | increasing     | 0          |
| <i>IVNS1ABP</i> | BA46   | 5.16E-16   | -0.00087  | 3.93E-13 | decreasing     | 0          |
| <i>JADE1</i>    | BA46   | 8.14E-07   | 0.000747  | 2.93E-08 | increasing     | 0          |
| <i>JADE2</i>    | BA46   | 1.26E-13   | 0.000769  | 2.58E-09 | increasing     | 0          |
| <i>JAKMIP2</i>  | BA46   | 6.03E-10   | -0.00075  | 1.57E-08 | decreasing     | 0          |
| <i>JAM2</i>     | BA46   | 5.66E-05   | -0.0007   | 2.54E-07 | decreasing     | 0          |
| <i>JAZF1</i>    | BA46   | 9.94E-09   | -0.00064  | 1.56E-06 | decreasing     | 0          |
| <i>JMY</i>      | BA46   | 9.25E-10   | -0.00021  | 0.150884 | other          | 0          |
| <i>JPH1</i>     | BA46   | 9.55E-09   | 0.00044   | 0.002257 | other          | 0          |
| <i>KBTBD11</i>  | BA46   | 5.18E-10   | 0.000751  | 6.99E-09 | increasing     | 0          |
| <i>KBTBD7</i>   | BA46   | 7.13E-08   | -3.42E-05 | 0.82017  | other          | 0          |
| <i>KCNA2</i>    | BA46   | 1.85E-12   | 0.000826  | 7.12E-12 | increasing     | 0          |
| <i>KCNA6</i>    | BA46   | 3.50E-08   | -0.00072  | 2.80E-08 | decreasing     | 0          |
| <i>KCNAB2</i>   | BA46   | 3.09E-10   | 0.000671  | 5.75E-07 | increasing     | 0          |
| <i>KCNC1</i>    | BA46   | 1.62E-15   | 0.00084   | 5.25E-12 | increasing     | 0          |
| <i>KCND3</i>    | BA46   | 2.91E-13   | 0.000832  | 1.75E-11 | increasing     | 0          |
| <i>KCNF1</i>    | BA46   | 1.75E-08   | -0.00076  | 3.67E-09 | decreasing     | 0          |
| <i>KCNG1</i>    | BA46   | 7.90E-12   | -0.00084  | 1.07E-11 | decreasing     | 0          |
| <i>KCNH1</i>    | BA46   | 1.29E-07   | 0.000237  | 0.10712  | other          | 0          |
| <i>KCNH2</i>    | BA46   | 2.50E-07   | 8.49E-05  | 0.571634 | other          | 0          |
| <i>KCNH3</i>    | BA46   | 6.41E-08   | -0.00065  | 3.66E-06 | decreasing     | 0          |
| <i>KCNIP2</i>   | BA46   | 2.28E-10   | 0.000641  | 3.58E-06 | increasing     | 0          |
| <i>KCNIP3</i>   | BA46   | 4.43E-11   | -0.00069  | 5.68E-07 | decreasing     | 0          |
| <i>KCNIP4</i>   | BA46   | 9.07E-08   | 0.000664  | 1.04E-06 | increasing     | 0          |
| <i>KCNJ11</i>   | BA46   | 4.38E-08   | 0.000658  | 1.09E-06 | increasing     | 0          |
| <i>KCNK1</i>    | BA46   | 2.55E-07   | 0.000575  | 2.98E-05 | increasing     | 0          |
| <i>KCNN2</i>    | BA46   | 2.81E-08   | 0.000376  | 0.010363 | other          | 0          |
| <i>KCNQ2</i>    | BA46   | 3.55E-08   | -0.0004   | 0.00669  | other          | 0          |
| <i>KCNQ3</i>    | BA46   | 1.87E-16   | -0.0009   | 7.39E-14 | decreasing     | 0          |
| <i>KCNQ5</i>    | BA46   | 7.17E-08   | 0.000279  | 0.056004 | other          | 0          |
| <i>KCNS1</i>    | BA46   | 1.53E-23   | 0.000921  | 6.09E-16 | increasing     | 0          |
| <i>KCNT1</i>    | BA46   | 3.33E-10   | 0.000694  | 2.08E-07 | increasing     | 0          |
| <i>KCNT2</i>    | BA46   | 1.10E-17   | -0.00088  | 1.82E-13 | decreasing     | 0          |
| <i>KCTD1</i>    | BA46   | 1.11E-09   | 0.000154  | 0.291483 | other          | 0          |
| <i>KCTD16</i>   | BA46   | 8.71E-08   | -0.00063  | 6.68E-06 | decreasing     | 0          |
| <i>KCTD2</i>    | BA46   | 9.52E-10   | 0.000831  | 7.24E-11 | increasing     | 0          |
| <i>KCTD9</i>    | BA46   | 7.90E-08   | 0.000752  | 8.13E-09 | increasing     | 0          |
| <i>KDM2B</i>    | BA46   | 3.77E-11   | -0.0008   | 2.02E-10 | decreasing     | 0          |
| <i>KDM7A</i>    | BA46   | 1.86E-07   | -0.00077  | 5.80E-09 | decreasing     | 0          |
| <i>KEL</i>      | BA46   | 2.11E-06   | 0.000728  | 6.09E-08 | increasing     | 0          |

**Supplementary Table 9. Genes with a significant age effect from either ANOVA or linear regression. Beta is the regression coefficient, Pval is the p-value for the regression coefficient of expression on age (in days). Effect category is increasing if beta is positive and significant, decreasing if beta is negative and significant, and other if the ANOVA were significant rather than the linear regression. Local eQTL is 1 if the gene had a significant local eQTL**

| Gene             | Tissue | Anova.pval | Beta      | Pval     | EffectCategory | Local eQTL |
|------------------|--------|------------|-----------|----------|----------------|------------|
| <i>KIAA0100</i>  | BA46   | 2.43E-06   | -0.00073  | 8.06E-08 | decreasing     | 0          |
| <i>KIAA0430</i>  | BA46   | 1.26E-08   | 0.000536  | 0.000118 | other          | 0          |
| <i>KIAA0513</i>  | BA46   | 3.45E-17   | 0.000871  | 1.42E-12 | increasing     | 0          |
| <i>KIAA1045</i>  | BA46   | 3.19E-12   | -0.00085  | 6.37E-12 | decreasing     | 0          |
| <i>KIAA1211</i>  | BA46   | 2.47E-07   | -0.00045  | 0.001736 | other          | 0          |
| <i>KIAA1211L</i> | BA46   | 8.46E-11   | 0.00064   | 2.45E-06 | increasing     | 0          |
| <i>KIAA1549</i>  | BA46   | 1.14E-08   | -0.00031  | 0.035606 | other          | 1          |
| <i>KIAA1598</i>  | BA46   | 1.98E-07   | 0.000442  | 0.002454 | other          | 1          |
| <i>KIAA1644</i>  | BA46   | 2.21E-08   | -0.0002   | 0.17551  | other          | 0          |
| <i>KIF21B</i>    | BA46   | 5.65E-19   | -0.0009   | 1.15E-14 | decreasing     | 0          |
| <i>KIF2A</i>     | BA46   | 1.19E-12   | -0.00077  | 1.63E-09 | decreasing     | 0          |
| <i>KIF3C</i>     | BA46   | 3.10E-07   | -0.00074  | 2.06E-08 | decreasing     | 0          |
| <i>KIF5C</i>     | BA46   | 1.84E-12   | -0.00086  | 1.07E-11 | decreasing     | 0          |
| <i>KIRREL</i>    | BA46   | 1.58E-07   | -0.00048  | 0.000633 | other          | 0          |
| <i>KIRREL3</i>   | BA46   | 2.96E-10   | -0.00082  | 5.98E-11 | decreasing     | 0          |
| <i>KISS1R</i>    | BA46   | 3.93E-13   | 0.000844  | 1.26E-12 | increasing     | 0          |
| <i>KIZ</i>       | BA46   | 7.69E-09   | 0.000417  | 0.003606 | other          | 0          |
| <i>KLF13</i>     | BA46   | 1.41E-10   | -0.00085  | 9.76E-12 | decreasing     | 0          |
| <i>KLF6</i>      | BA46   | 2.59E-07   | -0.00069  | 2.34E-07 | decreasing     | 0          |
| <i>KLF7</i>      | BA46   | 3.36E-11   | -0.00076  | 4.58E-09 | decreasing     | 0          |
| <i>KLF9</i>      | BA46   | 1.02E-10   | -0.00077  | 4.00E-09 | decreasing     | 0          |
| <i>KLHDC9</i>    | BA46   | 1.01E-07   | 0.000762  | 4.96E-09 | increasing     | 0          |
| <i>KLHL11</i>    | BA46   | 6.59E-07   | 0.00075   | 2.26E-08 | increasing     | 0          |
| <i>KLHL18</i>    | BA46   | 2.33E-07   | -0.00055  | 6.33E-05 | decreasing     | 0          |
| <i>KLHL21</i>    | BA46   | 4.87E-11   | 0.00083   | 4.98E-11 | increasing     | 0          |
| <i>KLHL23</i>    | BA46   | 1.50E-09   | -0.00068  | 2.71E-07 | decreasing     | 0          |
| <i>KLHL24</i>    | BA46   | 5.84E-11   | 0.00068   | 3.64E-07 | increasing     | 0          |
| <i>KLHL25</i>    | BA46   | 1.82E-09   | -0.00077  | 5.35E-09 | decreasing     | 0          |
| <i>KLHL29</i>    | BA46   | 3.14E-07   | -0.00072  | 4.12E-08 | decreasing     | 0          |
| <i>KLHL32</i>    | BA46   | 4.19E-12   | 0.000692  | 2.71E-07 | increasing     | 0          |
| <i>KLHL9</i>     | BA46   | 1.67E-07   | 1.56E-05  | 0.917069 | other          | 1          |
| <i>KLK6</i>      | BA46   | 1.88E-10   | 0.000812  | 5.71E-11 | increasing     | 0          |
| <i>KMT2A</i>     | BA46   | 1.97E-06   | 0.000703  | 1.94E-07 | increasing     | 0          |
| <i>KNCN</i>      | BA46   | 4.57E-05   | 0.000695  | 2.53E-07 | increasing     | 0          |
| <i>KPNA3</i>     | BA46   | 3.36E-09   | -0.00059  | 1.99E-05 | decreasing     | 0          |
| <i>KRBOX4</i>    | BA46   | 2.93E-05   | 0.000725  | 8.43E-08 | increasing     | 0          |
| <i>KRT7</i>      | BA46   | 9.20E-10   | -0.0001   | 0.500892 | other          | 0          |
| <i>KRT80</i>     | BA46   | 1.10E-07   | -1.42E-05 | 0.92546  | other          | 1          |
| <i>KY</i>        | BA46   | 6.67E-07   | 0.000712  | 5.27E-08 | increasing     | 0          |
| <i>L3MBTL1</i>   | BA46   | 1.22E-09   | -0.00078  | 9.33E-10 | decreasing     | 0          |



**Supplementary Table 9. Genes with a significant age effect from either ANOVA or linear regression. Beta is the regression coefficient, Pval is the p-value for the regression coefficient of expression on age (in days). Effect category is increasing if beta is positive and significant, decreasing if beta is negative and significant, and other if the ANOVA were significant rather than the linear regression. Local eQTL is 1 if the gene had a significant local eQTL**

| Gene         | Tissue | Anova.pval | Beta      | Pval     | EffectCategory | Local eQTL |
|--------------|--------|------------|-----------|----------|----------------|------------|
| LAMA4        | BA46   | 7.39E-08   | -0.00054  | 0.000143 | other          | 0          |
| LAMC1        | BA46   | 1.06E-09   | -0.00068  | 3.39E-07 | decreasing     | 0          |
| LANCL2       | BA46   | 1.87E-09   | -0.00074  | 1.44E-08 | decreasing     | 0          |
| LASP1        | BA46   | 1.30E-07   | -0.00078  | 3.30E-09 | decreasing     | 0          |
| LCORL        | BA46   | 7.25E-16   | -0.00084  | 1.29E-12 | decreasing     | 0          |
| LCP2         | BA46   | 2.88E-06   | -0.00076  | 1.60E-08 | decreasing     | 0          |
| LDB3         | BA46   | 3.94E-15   | 0.000836  | 2.26E-11 | increasing     | 0          |
| LDOC1L       | BA46   | 1.14E-07   | -0.00043  | 0.002659 | other          | 0          |
| LGALS8       | BA46   | 2.32E-07   | 0.000696  | 4.06E-07 | increasing     | 0          |
| LGI3         | BA46   | 7.04E-17   | 0.000852  | 1.64E-12 | increasing     | 0          |
| LGR6         | BA46   | 7.12E-09   | -0.00074  | 2.14E-08 | decreasing     | 0          |
| LHFPL3       | BA46   | 3.07E-14   | -0.00087  | 1.56E-12 | decreasing     | 0          |
| LHFPL5       | BA46   | 8.73E-08   | 0.000651  | 2.70E-06 | increasing     | 0          |
| LIMD2        | BA46   | 1.18E-06   | -0.00073  | 1.91E-08 | decreasing     | 0          |
| LINGO4       | BA46   | 6.75E-08   | 0.000658  | 1.46E-06 | increasing     | 0          |
| LOC103214744 | BA46   | 8.28E-09   | 0.000667  | 1.00E-06 | increasing     | 0          |
| LOC103214965 | BA46   | 2.38E-08   | -0.00026  | 0.073126 | other          | 1          |
| LOC103215127 | BA46   | 3.48E-06   | 0.00055   | 9.48E-08 | increasing     | 0          |
| LOC103215262 | BA46   | 2.03E-07   | -0.00029  | 0.053851 | other          | 0          |
| LOC103215364 | BA46   | 4.00E-08   | -5.90E-05 | 0.690935 | other          | 0          |
| LOC103215829 | BA46   | 1.16E-06   | -0.00072  | 5.55E-08 | decreasing     | 0          |
| LOC103215843 | BA46   | 4.64E-09   | -0.00068  | 7.51E-07 | decreasing     | 0          |
| LOC103215951 | BA46   | 1.18E-05   | 0.000704  | 1.61E-07 | increasing     | 0          |
| LOC103216062 | BA46   | 1.66E-07   | -7.11E-05 | 0.627942 | other          | 0          |
| LOC103216066 | BA46   | 2.62E-11   | 0.000759  | 6.12E-09 | increasing     | 0          |
| LOC103216135 | BA46   | 1.59E-08   | 0.000498  | 0.000398 | other          | 0          |
| LOC103216175 | BA46   | 4.82E-09   | 0.000767  | 1.68E-09 | increasing     | 1          |
| LOC103216270 | BA46   | 7.83E-08   | -0.00052  | 0.000231 | other          | 0          |
| LOC103216325 | BA46   | 1.34E-08   | 0.000706  | 8.52E-08 | increasing     | 0          |
| LOC103216550 | BA46   | 2.47E-07   | -0.00072  | 7.26E-08 | decreasing     | 0          |
| LOC103217195 | BA46   | 2.03E-07   | -0.00064  | 1.50E-06 | decreasing     | 0          |
| LOC103217197 | BA46   | 1.70E-06   | -0.00073  | 1.06E-08 | decreasing     | 0          |
| LOC103217236 | BA46   | 6.08E-08   | 0.000357  | 0.016041 | other          | 0          |
| LOC103217966 | BA46   | 1.00E-07   | 0.000278  | 0.058185 | other          | 1          |
| LOC103218099 | BA46   | 3.97E-08   | -0.00066  | 2.28E-06 | decreasing     | 0          |
| LOC103218165 | BA46   | 2.66E-09   | 0.000723  | 8.73E-08 | increasing     | 0          |
| LOC103218261 | BA46   | 2.53E-08   | 0.000624  | 5.49E-06 | increasing     | 1          |
| LOC103218710 | BA46   | 3.67E-09   | -0.00071  | 1.15E-07 | decreasing     | 0          |
| LOC103218716 | BA46   | 2.39E-07   | -0.00038  | 0.0111   | other          | 0          |
| LOC103218887 | BA46   | 7.51E-08   | 0.000444  | 0.00166  | other          | 0          |

**Supplementary Table 9. Genes with a significant age effect from either ANOVA or linear regression. Beta is the regression coefficient, Pval is the p-value for the regression coefficient of expression on age (in days). Effect category is increasing if beta is positive and significant, decreasing if beta is negative and significant, and other if the ANOVA were significant rather than the linear regression. Local eQTL is 1 if the gene had a significant local eQTL**

| Gene         | Tissue | Anova.pval | Beta      | Pval     | EffectCategory | Local eQTL |
|--------------|--------|------------|-----------|----------|----------------|------------|
| LOC103219120 | BA46   | 1.79E-15   | -0.00085  | 1.35E-12 | decreasing     | 0          |
| LOC103219428 | BA46   | 2.41E-07   | 0.000712  | 8.01E-08 | increasing     | 0          |
| LOC103219982 | BA46   | 5.47E-10   | -0.00072  | 2.45E-08 | decreasing     | 0          |
| LOC103220245 | BA46   | 2.40E-07   | 0.000117  | 0.434963 | other          | 0          |
| LOC103221116 | BA46   | 2.05E-10   | 0.000717  | 2.30E-08 | increasing     | 0          |
| LOC103221138 | BA46   | 1.39E-08   | 0.000777  | 2.11E-09 | increasing     | 0          |
| LOC103221197 | BA46   | 5.81E-09   | 0.000178  | 0.224468 | other          | 0          |
| LOC103221287 | BA46   | 3.83E-11   | -0.00079  | 5.25E-10 | decreasing     | 0          |
| LOC103221291 | BA46   | 1.61E-12   | -0.0008   | 7.55E-10 | decreasing     | 0          |
| LOC103221412 | BA46   | 3.23E-09   | 0.000795  | 1.04E-10 | increasing     | 0          |
| LOC103221449 | BA46   | 1.96E-07   | -0.00059  | 1.50E-05 | decreasing     | 0          |
| LOC103221689 | BA46   | 1.47E-05   | -0.00071  | 2.45E-07 | decreasing     | 0          |
| LOC103221863 | BA46   | 2.49E-07   | 0.000667  | 6.88E-07 | increasing     | 1          |
| LOC103221933 | BA46   | 2.00E-08   | -0.00061  | 4.81E-06 | decreasing     | 0          |
| LOC103221935 | BA46   | 1.34E-08   | -0.00061  | 4.94E-06 | decreasing     | 0          |
| LOC103221944 | BA46   | 8.34E-09   | -0.00057  | 3.96E-05 | decreasing     | 0          |
| LOC103221945 | BA46   | 1.01E-10   | -0.00076  | 5.28E-09 | decreasing     | 0          |
| LOC103221971 | BA46   | 1.96E-09   | 0.000192  | 0.205255 | other          | 0          |
| LOC103221972 | BA46   | 5.49E-08   | 7.82E-05  | 0.60266  | other          | 0          |
| LOC103221997 | BA46   | 7.12E-08   | -0.0006   | 1.61E-05 | decreasing     | 0          |
| LOC103221998 | BA46   | 1.77E-07   | -0.00049  | 0.00059  | other          | 0          |
| LOC103222001 | BA46   | 1.90E-07   | -0.00049  | 0.000683 | other          | 0          |
| LOC103222004 | BA46   | 9.51E-10   | -0.00064  | 1.74E-06 | decreasing     | 0          |
| LOC103222006 | BA46   | 1.08E-10   | -0.00065  | 2.38E-06 | decreasing     | 0          |
| LOC103222008 | BA46   | 2.12E-09   | -4.53E-05 | 0.762793 | other          | 0          |
| LOC103222017 | BA46   | 3.67E-09   | 0.000319  | 0.033366 | other          | 0          |
| LOC103222020 | BA46   | 3.79E-08   | 0.000521  | 0.000286 | other          | 0          |
| LOC103222057 | BA46   | 6.40E-09   | -0.00013  | 0.387705 | other          | 0          |
| LOC103222075 | BA46   | 1.36E-09   | -0.00076  | 1.13E-08 | decreasing     | 0          |
| LOC103222083 | BA46   | 2.53E-11   | 0.000789  | 7.09E-11 | increasing     | 0          |
| LOC103222154 | BA46   | 5.09E-08   | 0.000104  | 0.490053 | other          | 0          |
| LOC103222274 | BA46   | 6.30E-09   | -0.00055  | 0.000113 | other          | 0          |
| LOC103222280 | BA46   | 5.19E-11   | -0.00074  | 7.48E-09 | decreasing     | 0          |
| LOC103222373 | BA46   | 1.59E-08   | -0.00065  | 1.88E-06 | decreasing     | 0          |
| LOC103222510 | BA46   | 1.26E-11   | -0.0008   | 3.87E-10 | decreasing     | 0          |
| LOC103222548 | BA46   | 1.34E-07   | 0.000662  | 1.94E-06 | increasing     | 0          |
| LOC103222563 | BA46   | 4.61E-09   | -0.00079  | 5.45E-10 | decreasing     | 0          |
| LOC103222608 | BA46   | 2.22E-08   | 0.000514  | 0.00024  | other          | 0          |
| LOC103222721 | BA46   | 1.43E-08   | -0.0007   | 3.55E-07 | decreasing     | 1          |
| LOC103222800 | BA46   | 2.82E-08   | -0.00054  | 0.000119 | other          | 0          |

**Supplementary Table 9. Genes with a significant age effect from either ANOVA or linear regression. Beta is the regression coefficient, Pval is the p-value for the regression coefficient of expression on age (in days). Effect category is increasing if beta is positive and significant, decreasing if beta is negative and significant, and other if the ANOVA were significant rather than the linear regression. Local eQTL is 1 if the gene had a significant local eQTL**

| Gene         | Tissue | Anova.pval | Beta     | Pval     | EffectCategory | Local eQTL |
|--------------|--------|------------|----------|----------|----------------|------------|
| LOC103222940 | BA46   | 3.52E-08   | -0.00069 | 2.88E-07 | decreasing     | 1          |
| LOC103222965 | BA46   | 2.24E-09   | 0.000691 | 1.67E-07 | increasing     | 0          |
| LOC103223027 | BA46   | 4.50E-06   | 0.00068  | 3.97E-09 | increasing     | 0          |
| LOC103223096 | BA46   | 4.74E-12   | -0.00084 | 7.59E-12 | decreasing     | 0          |
| LOC103223099 | BA46   | 4.50E-13   | -0.00083 | 3.43E-12 | decreasing     | 0          |
| LOC103223177 | BA46   | 8.66E-09   | -0.00069 | 2.13E-07 | decreasing     | 0          |
| LOC103223219 | BA46   | 1.40E-08   | 0.000612 | 1.00E-05 | increasing     | 0          |
| LOC103223445 | BA46   | 6.20E-15   | -0.00084 | 3.92E-12 | decreasing     | 0          |
| LOC103223518 | BA46   | 5.31E-08   | 0.000401 | 0.005459 | other          | 0          |
| LOC103223600 | BA46   | 1.10E-06   | 0.000732 | 9.09E-09 | increasing     | 1          |
| LOC103223617 | BA46   | 1.15E-06   | -0.00069 | 1.44E-07 | decreasing     | 1          |
| LOC103223633 | BA46   | 1.26E-14   | -0.00052 | 0.000208 | other          | 0          |
| LOC103223656 | BA46   | 1.72E-12   | -0.00053 | 0.000123 | other          | 0          |
| LOC103223660 | BA46   | 2.84E-10   | -0.00058 | 3.22E-05 | decreasing     | 0          |
| LOC103223665 | BA46   | 2.05E-07   | -0.00023 | 0.117863 | other          | 0          |
| LOC103224231 | BA46   | 3.22E-14   | 0.000836 | 4.82E-12 | increasing     | 0          |
| LOC103224287 | BA46   | 5.65E-10   | -0.00077 | 2.64E-09 | decreasing     | 0          |
| LOC103224382 | BA46   | 2.43E-12   | -0.00078 | 2.10E-09 | decreasing     | 0          |
| LOC103224383 | BA46   | 1.20E-15   | -0.00086 | 1.50E-12 | decreasing     | 0          |
| LOC103224431 | BA46   | 4.99E-13   | -0.0008  | 1.28E-10 | decreasing     | 0          |
| LOC103224456 | BA46   | 1.68E-09   | 0.00052  | 0.000162 | other          | 0          |
| LOC103224536 | BA46   | 4.86E-11   | -0.0008  | 8.65E-10 | decreasing     | 0          |
| LOC103224678 | BA46   | 1.63E-07   | -0.00074 | 4.03E-08 | decreasing     | 0          |
| LOC103224735 | BA46   | 1.17E-08   | -0.00071 | 1.22E-07 | decreasing     | 0          |
| LOC103225435 | BA46   | 1.25E-07   | -0.00029 | 0.045631 | other          | 0          |
| LOC103225645 | BA46   | 3.83E-13   | 0.000822 | 4.19E-11 | increasing     | 0          |
| LOC103225786 | BA46   | 5.42E-10   | -0.00011 | 0.461591 | other          | 0          |
| LOC103225826 | BA46   | 5.35E-08   | -0.00075 | 3.24E-09 | decreasing     | 0          |
| LOC103225917 | BA46   | 4.65E-06   | -0.00073 | 5.50E-08 | decreasing     | 0          |
| LOC103226050 | BA46   | 2.78E-07   | -0.0007  | 1.46E-07 | decreasing     | 0          |
| LOC103226149 | BA46   | 5.03E-11   | 0.000849 | 1.94E-11 | increasing     | 0          |
| LOC103226232 | BA46   | 1.84E-07   | -0.00067 | 8.66E-07 | decreasing     | 1          |
| LOC103226647 | BA46   | 3.33E-08   | -0.00067 | 9.59E-07 | decreasing     | 0          |
| LOC103226670 | BA46   | 2.30E-06   | 0.000716 | 1.44E-07 | increasing     | 0          |
| LOC103226908 | BA46   | 1.02E-11   | 0.000728 | 1.22E-08 | increasing     | 0          |
| LOC103226909 | BA46   | 1.13E-07   | 0.000654 | 1.06E-06 | increasing     | 0          |
| LOC103226929 | BA46   | 6.31E-08   | 0.000673 | 4.15E-07 | increasing     | 0          |
| LOC103227909 | BA46   | 3.33E-08   | -0.00071 | 9.74E-08 | decreasing     | 0          |
| LOC103227910 | BA46   | 5.11E-09   | -0.00073 | 2.85E-08 | decreasing     | 0          |
| LOC103227976 | BA46   | 1.02E-07   | -0.00031 | 0.034182 | other          | 0          |

**Supplementary Table 9. Genes with a significant age effect from either ANOVA or linear regression. Beta is the regression coefficient, Pval is the p-value for the regression coefficient of expression on age (in days). Effect category is increasing if beta is positive and significant, decreasing if beta is negative and significant, and other if the ANOVA were significant rather than the linear regression. Local eQTL is 1 if the gene had a significant local eQTL**

| Gene         | Tissue | Anova.pval | Beta      | Pval     | EffectCategory | Local eQTL |
|--------------|--------|------------|-----------|----------|----------------|------------|
| LOC103228058 | BA46   | 2.86E-09   | -0.00065  | 2.28E-06 | decreasing     | 1          |
| LOC103228345 | BA46   | 6.28E-08   | -0.00039  | 0.006832 | other          | 1          |
| LOC103228593 | BA46   | 1.42E-07   | -0.00062  | 3.88E-06 | decreasing     | 0          |
| LOC103228595 | BA46   | 7.85E-13   | -0.00083  | 1.48E-11 | decreasing     | 0          |
| LOC103228596 | BA46   | 8.21E-07   | -0.00075  | 1.77E-08 | decreasing     | 0          |
| LOC103228598 | BA46   | 5.58E-08   | -0.00073  | 2.84E-08 | decreasing     | 0          |
| LOC103228599 | BA46   | 6.98E-11   | -0.00084  | 2.19E-11 | decreasing     | 0          |
| LOC103228600 | BA46   | 7.11E-08   | -0.00071  | 6.15E-08 | decreasing     | 0          |
| LOC103228601 | BA46   | 4.54E-10   | -0.00078  | 8.49E-10 | decreasing     | 0          |
| LOC103228602 | BA46   | 7.98E-12   | -0.00082  | 4.07E-11 | decreasing     | 0          |
| LOC103228603 | BA46   | 1.40E-09   | -0.00079  | 6.78E-10 | decreasing     | 0          |
| LOC103228604 | BA46   | 8.33E-13   | -0.00081  | 9.36E-11 | decreasing     | 0          |
| LOC103228607 | BA46   | 2.87E-10   | -0.00075  | 1.20E-08 | decreasing     | 0          |
| LOC103228626 | BA46   | 3.20E-10   | -0.00083  | 1.44E-11 | decreasing     | 0          |
| LOC103228749 | BA46   | 3.07E-08   | -0.00023  | 0.118746 | other          | 0          |
| LOC103228897 | BA46   | 4.83E-08   | 0.000729  | 5.21E-08 | increasing     | 0          |
| LOC103229137 | BA46   | 2.32E-12   | -0.00081  | 1.72E-10 | decreasing     | 0          |
| LOC103229197 | BA46   | 8.40E-12   | -0.00072  | 2.46E-08 | decreasing     | 0          |
| LOC103229569 | BA46   | 1.87E-09   | 0.000693  | 9.14E-08 | increasing     | 0          |
| LOC103229610 | BA46   | 2.12E-09   | -0.00073  | 5.83E-08 | decreasing     | 0          |
| LOC103229611 | BA46   | 1.99E-08   | -0.00072  | 1.14E-07 | decreasing     | 1          |
| LOC103229921 | BA46   | 7.87E-11   | -0.00074  | 1.68E-08 | decreasing     | 0          |
| LOC103230141 | BA46   | 2.08E-07   | 1.18E-05  | 0.937602 | other          | 0          |
| LOC103230209 | BA46   | 8.14E-06   | -0.00071  | 1.66E-07 | decreasing     | 1          |
| LOC103230295 | BA46   | 2.44E-07   | 0.000657  | 1.42E-06 | increasing     | 0          |
| LOC103230361 | BA46   | 1.75E-07   | -0.00071  | 1.29E-07 | decreasing     | 0          |
| LOC103230633 | BA46   | 6.14E-10   | 2.85E-06  | 0.984955 | other          | 0          |
| LOC103230635 | BA46   | 8.06E-09   | -4.80E-05 | 0.746767 | other          | 0          |
| LOC103230650 | BA46   | 1.35E-08   | -0.00073  | 1.32E-08 | decreasing     | 1          |
| LOC103230770 | BA46   | 5.52E-12   | 0.0008    | 4.98E-10 | increasing     | 0          |
| LOC103230800 | BA46   | 3.22E-18   | -0.0009   | 4.33E-14 | decreasing     | 0          |
| LOC103231081 | BA46   | 1.58E-09   | -0.00076  | 9.75E-09 | decreasing     | 0          |
| LOC103231153 | BA46   | 1.06E-10   | -0.00078  | 1.96E-09 | decreasing     | 1          |
| LOC103231470 | BA46   | 7.51E-09   | 0.000651  | 1.19E-06 | increasing     | 0          |
| LOC103231498 | BA46   | 5.19E-08   | -0.00074  | 2.58E-08 | decreasing     | 0          |
| LOC103231548 | BA46   | 1.28E-10   | -0.00077  | 1.79E-09 | decreasing     | 0          |
| LOC103231593 | BA46   | 1.65E-07   | 0.000581  | 3.23E-05 | increasing     | 0          |
| LOC103231987 | BA46   | 4.76E-08   | 0.000722  | 8.01E-08 | increasing     | 0          |
| LOC103232002 | BA46   | 5.76E-08   | -0.00011  | 0.473175 | other          | 0          |
| LOC103232043 | BA46   | 4.26E-08   | 0.000216  | 0.147582 | other          | 0          |

**Supplementary Table 9. Genes with a significant age effect from either ANOVA or linear regression. Beta is the regression coefficient, Pval is the p-value for the regression coefficient of expression on age (in days). Effect category is increasing if beta is positive and significant, decreasing if beta is negative and significant, and other if the ANOVA were significant rather than the linear regression. Local eQTL is 1 if the gene had a significant local eQTL**

| Gene         | Tissue | Anova.pval | Beta      | Pval     | EffectCategory | Local eQTL |
|--------------|--------|------------|-----------|----------|----------------|------------|
| LOC103232203 | BA46   | 1.32E-08   | 0.000742  | 2.29E-08 | increasing     | 0          |
| LOC103232311 | BA46   | 9.73E-09   | -0.00072  | 2.43E-08 | decreasing     | 0          |
| LOC103232409 | BA46   | 5.55E-07   | 0.000736  | 3.81E-08 | increasing     | 0          |
| LOC103232553 | BA46   | 5.00E-08   | 0.000617  | 7.44E-06 | increasing     | 0          |
| LOC103232974 | BA46   | 9.29E-08   | -0.00049  | 0.000655 | other          | 0          |
| LOC103233113 | BA46   | 1.17E-10   | -0.0008   | 3.26E-10 | decreasing     | 0          |
| LOC103233444 | BA46   | 3.33E-08   | 0.000515  | 0.000234 | other          | 1          |
| LOC103233451 | BA46   | 1.89E-07   | 0.000703  | 2.84E-07 | increasing     | 0          |
| LOC103233667 | BA46   | 2.04E-08   | 0.000694  | 2.11E-07 | increasing     | 0          |
| LOC103233674 | BA46   | 8.01E-06   | -0.00075  | 1.99E-08 | decreasing     | 0          |
| LOC103233923 | BA46   | 6.17E-07   | -0.00078  | 2.39E-09 | decreasing     | 0          |
| LOC103233961 | BA46   | 6.51E-08   | -0.0007   | 5.22E-08 | decreasing     | 0          |
| LOC103234031 | BA46   | 3.08E-11   | 0.000772  | 1.74E-09 | increasing     | 0          |
| LOC103234033 | BA46   | 3.25E-10   | -0.00081  | 2.11E-10 | decreasing     | 0          |
| LOC103234347 | BA46   | 4.23E-11   | -0.00064  | 2.10E-06 | decreasing     | 0          |
| LOC103234469 | BA46   | 4.83E-08   | 0.000741  | 3.54E-08 | increasing     | 0          |
| LOC103234618 | BA46   | 1.08E-07   | -0.0007   | 1.18E-07 | decreasing     | 0          |
| LOC103234986 | BA46   | 2.09E-09   | 0.000652  | 2.11E-06 | increasing     | 0          |
| LOC103235597 | BA46   | 5.13E-09   | -0.00064  | 2.65E-06 | decreasing     | 0          |
| LOC103235792 | BA46   | 4.81E-06   | 0.0007    | 1.43E-07 | increasing     | 0          |
| LOC103236318 | BA46   | 1.38E-07   | 0.000754  | 1.27E-08 | increasing     | 0          |
| LOC103236784 | BA46   | 8.49E-08   | 0.000712  | 6.41E-08 | increasing     | 0          |
| LOC103236863 | BA46   | 1.97E-09   | 0.000148  | 0.325265 | other          | 0          |
| LOC103236930 | BA46   | 5.49E-10   | -0.00081  | 3.32E-10 | decreasing     | 0          |
| LOC103237300 | BA46   | 7.77E-08   | -0.00074  | 6.00E-09 | decreasing     | 0          |
| LOC103237306 | BA46   | 1.76E-06   | -0.00071  | 3.47E-08 | decreasing     | 0          |
| LOC103237374 | BA46   | 3.03E-05   | -0.00069  | 2.09E-07 | decreasing     | 0          |
| LOC103237383 | BA46   | 1.25E-06   | -0.00074  | 2.67E-08 | decreasing     | 0          |
| LOC103237442 | BA46   | 1.23E-05   | -0.00071  | 2.09E-07 | decreasing     | 0          |
| LOC103237464 | BA46   | 2.81E-10   | -0.0007   | 1.40E-07 | decreasing     | 0          |
| LOC103237465 | BA46   | 1.49E-11   | -0.00069  | 3.55E-08 | decreasing     | 0          |
| LOC103237488 | BA46   | 1.31E-07   | -0.00047  | 0.001304 | other          | 0          |
| LOC103237511 | BA46   | 6.90E-16   | 0.000815  | 7.32E-11 | increasing     | 0          |
| LOC103237714 | BA46   | 8.07E-09   | 0.000606  | 8.81E-06 | increasing     | 0          |
| LOC103237778 | BA46   | 1.83E-07   | 0.000531  | 0.000169 | other          | 0          |
| LOC103237807 | BA46   | 1.73E-09   | -7.08E-05 | 0.635606 | other          | 0          |
| LOC103237842 | BA46   | 1.35E-08   | -0.00028  | 0.05356  | other          | 1          |
| LOC103237870 | BA46   | 3.57E-09   | -0.00076  | 2.48E-09 | decreasing     | 0          |
| LOC103237871 | BA46   | 2.83E-09   | -0.00074  | 4.69E-09 | decreasing     | 0          |
| LOC103237872 | BA46   | 4.53E-09   | -0.0007   | 4.54E-08 | decreasing     | 0          |

**Supplementary Table 9. Genes with a significant age effect from either ANOVA or linear regression. Beta is the regression coefficient, Pval is the p-value for the regression coefficient of expression on age (in days). Effect category is increasing if beta is positive and significant, decreasing if beta is negative and significant, and other if the ANOVA were significant rather than the linear regression. Local eQTL is 1 if the gene had a significant local eQTL**

| Gene                | Tissue | Anova.pval | Beta      | Pval     | EffectCategory | Local eQTL |
|---------------------|--------|------------|-----------|----------|----------------|------------|
| <i>LOC103237873</i> | BA46   | 2.40E-09   | -0.00075  | 2.33E-09 | decreasing     | 0          |
| <i>LOC103238342</i> | BA46   | 1.73E-13   | 0.000755  | 6.55E-09 | increasing     | 0          |
| <i>LOC103239234</i> | BA46   | 2.35E-08   | 0.000795  | 5.39E-10 | increasing     | 0          |
| <i>LOC103239260</i> | BA46   | 1.07E-09   | 0.000668  | 3.49E-07 | increasing     | 0          |
| <i>LOC103239367</i> | BA46   | 1.74E-11   | -0.0008   | 7.15E-11 | decreasing     | 0          |
| <i>LOC103239368</i> | BA46   | 5.99E-09   | -0.00073  | 9.61E-09 | decreasing     | 0          |
| <i>LOC103239374</i> | BA46   | 3.25E-10   | -0.00075  | 1.21E-08 | decreasing     | 0          |
| <i>LOC103239382</i> | BA46   | 1.10E-09   | -0.00011  | 0.448152 | other          | 0          |
| <i>LOC103239398</i> | BA46   | 3.76E-08   | -0.00064  | 4.72E-06 | decreasing     | 0          |
| <i>LOC103239420</i> | BA46   | 7.22E-08   | 0.000137  | 0.36223  | other          | 0          |
| <i>LOC103239443</i> | BA46   | 5.66E-08   | -9.13E-05 | 0.544187 | other          | 0          |
| <i>LOC103239471</i> | BA46   | 1.69E-08   | 0.000786  | 1.82E-09 | increasing     | 0          |
| <i>LOC103239535</i> | BA46   | 1.13E-09   | -0.00082  | 1.89E-10 | decreasing     | 1          |
| <i>LOC103240196</i> | BA46   | 1.35E-09   | 0.000579  | 3.25E-05 | increasing     | 0          |
| <i>LOC103240214</i> | BA46   | 1.21E-08   | -0.00073  | 2.20E-08 | decreasing     | 0          |
| <i>LOC103240400</i> | BA46   | 2.51E-09   | 0.000621  | 8.05E-06 | increasing     | 0          |
| <i>LOC103240653</i> | BA46   | 1.56E-07   | -0.00053  | 2.36E-05 | decreasing     | 0          |
| <i>LOC103240698</i> | BA46   | 1.64E-06   | -0.00072  | 1.01E-07 | decreasing     | 0          |
| <i>LOC103240889</i> | BA46   | 1.39E-07   | -3.86E-06 | 0.979662 | other          | 0          |
| <i>LOC103240941</i> | BA46   | 1.85E-08   | -0.00072  | 6.56E-08 | decreasing     | 0          |
| <i>LOC103241172</i> | BA46   | 9.70E-08   | -0.00062  | 1.47E-06 | decreasing     | 0          |
| <i>LOC103241174</i> | BA46   | 5.10E-12   | -0.00078  | 5.69E-10 | decreasing     | 0          |
| <i>LOC103241371</i> | BA46   | 6.82E-15   | -0.00081  | 4.23E-11 | decreasing     | 0          |
| <i>LOC103241400</i> | BA46   | 1.03E-06   | 0.000724  | 3.71E-09 | increasing     | 0          |
| <i>LOC103241685</i> | BA46   | 1.45E-12   | 0.000813  | 1.12E-10 | increasing     | 0          |
| <i>LOC103241686</i> | BA46   | 4.12E-08   | 0.000713  | 2.92E-08 | increasing     | 0          |
| <i>LOC103242438</i> | BA46   | 2.59E-07   | -0.00069  | 1.00E-07 | decreasing     | 0          |
| <i>LOC103242583</i> | BA46   | 5.34E-12   | -0.00082  | 3.95E-11 | decreasing     | 0          |
| <i>LOC103242586</i> | BA46   | 1.01E-07   | -0.00078  | 1.36E-09 | decreasing     | 0          |
| <i>LOC103242716</i> | BA46   | 4.73E-08   | 0.000663  | 1.47E-06 | increasing     | 0          |
| <i>LOC103242734</i> | BA46   | 1.56E-09   | -0.00071  | 1.98E-07 | decreasing     | 1          |
| <i>LOC103242748</i> | BA46   | 1.42E-16   | -0.00077  | 5.67E-09 | decreasing     | 0          |
| <i>LOC103242768</i> | BA46   | 2.04E-07   | -0.00066  | 1.95E-06 | decreasing     | 0          |
| <i>LOC103242825</i> | BA46   | 1.87E-09   | -0.00035  | 0.018082 | other          | 0          |
| <i>LOC103242925</i> | BA46   | 1.11E-08   | 0.000684  | 2.35E-07 | increasing     | 0          |
| <i>LOC103243079</i> | BA46   | 9.80E-16   | 0.000876  | 9.03E-13 | increasing     | 0          |
| <i>LOC103243159</i> | BA46   | 8.98E-11   | -0.00077  | 7.00E-10 | decreasing     | 0          |
| <i>LOC103243177</i> | BA46   | 2.72E-09   | -5.59E-05 | 0.709057 | other          | 0          |
| <i>LOC103243838</i> | BA46   | 1.04E-11   | -0.00075  | 9.65E-09 | decreasing     | 0          |
| <i>LOC103243870</i> | BA46   | 5.30E-06   | 0.000613  | 1.41E-07 | increasing     | 0          |

**Supplementary Table 9. Genes with a significant age effect from either ANOVA or linear regression. Beta is the regression coefficient, Pval is the p-value for the regression coefficient of expression on age (in days). Effect category is increasing if beta is positive and significant, decreasing if beta is negative and significant, and other if the ANOVA were significant rather than the linear regression. Local eQTL is 1 if the gene had a significant local eQTL**

| Gene                | Tissue | Anova.pval | Beta     | Pval     | EffectCategory | Local eQTL |
|---------------------|--------|------------|----------|----------|----------------|------------|
| <i>LOC103244047</i> | BA46   | 2.99E-10   | 0.000702 | 1.38E-07 | increasing     | 0          |
| <i>LOC103244070</i> | BA46   | 2.71E-09   | 0.000702 | 5.74E-08 | increasing     | 0          |
| <i>LOC103244091</i> | BA46   | 3.18E-10   | 0.000734 | 2.90E-08 | increasing     | 0          |
| <i>LOC103244127</i> | BA46   | 1.80E-07   | 0.000464 | 0.00121  | other          | 0          |
| <i>LOC103244197</i> | BA46   | 2.39E-07   | -0.00035 | 0.014657 | other          | 0          |
| <i>LOC103244243</i> | BA46   | 4.81E-10   | 0.000843 | 3.10E-11 | increasing     | 0          |
| <i>LOC103244421</i> | BA46   | 1.17E-10   | -0.00081 | 1.20E-10 | decreasing     | 0          |
| <i>LOC103244468</i> | BA46   | 8.00E-08   | -0.00069 | 9.26E-08 | decreasing     | 0          |
| <i>LOC103244678</i> | BA46   | 1.83E-11   | -0.00071 | 4.49E-08 | decreasing     | 0          |
| <i>LOC103244679</i> | BA46   | 8.36E-10   | -0.0008  | 3.49E-10 | decreasing     | 0          |
| <i>LOC103244751</i> | BA46   | 5.54E-08   | -0.00068 | 5.44E-07 | decreasing     | 0          |
| <i>LOC103245124</i> | BA46   | 2.90E-09   | 0.000661 | 1.22E-10 | increasing     | 0          |
| <i>LOC103245136</i> | BA46   | 2.43E-08   | 0.000725 | 7.87E-08 | increasing     | 0          |
| <i>LOC103245175</i> | BA46   | 1.29E-09   | -0.00058 | 3.02E-05 | decreasing     | 0          |
| <i>LOC103245191</i> | BA46   | 2.53E-07   | -0.00065 | 2.58E-06 | decreasing     | 0          |
| <i>LOC103245291</i> | BA46   | 7.66E-08   | 0.000762 | 4.90E-09 | increasing     | 0          |
| <i>LOC103245629</i> | BA46   | 2.25E-07   | 2.00E-05 | 0.893554 | other          | 0          |
| <i>LOC103245855</i> | BA46   | 2.32E-08   | -0.00057 | 3.99E-05 | decreasing     | 0          |
| <i>LOC103246030</i> | BA46   | 7.08E-08   | 0.00068  | 8.45E-07 | increasing     | 0          |
| <i>LOC103246386</i> | BA46   | 4.61E-08   | 0.000292 | 0.045208 | other          | 0          |
| <i>LOC103246438</i> | BA46   | 2.52E-07   | -0.00023 | 0.119512 | other          | 0          |
| <i>LOC103246562</i> | BA46   | 4.66E-07   | 0.000723 | 1.06E-07 | increasing     | 0          |
| <i>LOC103247226</i> | BA46   | 2.37E-11   | 0.000628 | 3.49E-06 | increasing     | 0          |
| <i>LOC103247904</i> | BA46   | 3.44E-14   | -0.00023 | 0.016166 | other          | 0          |
| <i>LOC103248295</i> | BA46   | 1.95E-16   | 0.0008   | 5.46E-11 | increasing     | 0          |
| <i>LOC103248411</i> | BA46   | 6.67E-08   | 0.000504 | 0.000397 | other          | 0          |
| <i>LOC103248425</i> | BA46   | 1.46E-08   | -0.00077 | 5.15E-09 | decreasing     | 0          |
| <i>LOC103248740</i> | BA46   | 2.00E-07   | -0.00046 | 0.001714 | other          | 0          |
| <i>LOC103248801</i> | BA46   | 3.73E-10   | -0.00057 | 2.28E-05 | decreasing     | 0          |
| <i>LOC103248867</i> | BA46   | 4.25E-09   | -0.00067 | 2.65E-07 | decreasing     | 0          |
| <i>LOC103248870</i> | BA46   | 6.22E-08   | -0.00067 | 1.17E-06 | decreasing     | 0          |
| <i>LOC103248873</i> | BA46   | 1.67E-09   | -0.00073 | 5.70E-08 | decreasing     | 0          |
| <i>LOC103248904</i> | BA46   | 2.34E-07   | -0.00056 | 8.38E-05 | decreasing     | 0          |
| <i>LONRF1</i>       | BA46   | 1.02E-08   | 0.000547 | 6.47E-05 | increasing     | 0          |
| <i>LOXHD1</i>       | BA46   | 5.32E-08   | -0.00051 | 0.00032  | other          | 0          |
| <i>LPA</i>          | BA46   | 4.90E-07   | -0.0007  | 4.73E-08 | decreasing     | 1          |
| <i>LPCAT1</i>       | BA46   | 4.09E-08   | -0.00058 | 1.91E-05 | decreasing     | 0          |
| <i>LPCAT3</i>       | BA46   | 1.68E-07   | -0.0006  | 1.18E-05 | decreasing     | 0          |
| <i>LPHN1</i>        | BA46   | 9.50E-06   | -0.0007  | 2.44E-07 | decreasing     | 0          |
| <i>LPIN1</i>        | BA46   | 1.30E-08   | 0.000689 | 3.42E-07 | increasing     | 0          |

**Supplementary Table 9. Genes with a significant age effect from either ANOVA or linear regression. Beta is the regression coefficient, Pval is the p-value for the regression coefficient of expression on age (in days). Effect category is increasing if beta is positive and significant, decreasing if beta is negative and significant, and other if the ANOVA were significant rather than the linear regression. Local eQTL is 1 if the gene had a significant local eQTL**

| Gene            | Tissue | Anova.pval | Beta      | Pval     | EffectCategory | Local eQTL |
|-----------------|--------|------------|-----------|----------|----------------|------------|
| <i>LRP8</i>     | BA46   | 3.72E-08   | -0.0006   | 9.57E-06 | decreasing     | 1          |
| <i>LRRC16B</i>  | BA46   | 1.61E-15   | -0.00086  | 3.35E-13 | decreasing     | 0          |
| <i>LRRC3B</i>   | BA46   | 1.64E-11   | -0.00076  | 6.53E-09 | decreasing     | 0          |
| <i>LRRC4C</i>   | BA46   | 1.63E-08   | -0.00061  | 8.89E-06 | decreasing     | 0          |
| <i>LRRC7</i>    | BA46   | 1.33E-20   | -0.00091  | 1.67E-14 | decreasing     | 0          |
| <i>LRRK2</i>    | BA46   | 7.01E-08   | 0.000572  | 3.34E-05 | increasing     | 0          |
| <i>LRRN3</i>    | BA46   | 8.07E-08   | 4.25E-05  | 0.777377 | other          | 0          |
| <i>LRRTM1</i>   | BA46   | 3.88E-10   | -0.00079  | 6.02E-10 | decreasing     | 0          |
| <i>LTBP3</i>    | BA46   | 1.14E-08   | 0.000794  | 4.63E-10 | increasing     | 0          |
| <i>LTBP4</i>    | BA46   | 2.02E-07   | -0.00077  | 1.52E-09 | decreasing     | 0          |
| <i>LTK</i>      | BA46   | 1.09E-08   | -1.94E-05 | 0.896674 | other          | 0          |
| <i>LURAP1</i>   | BA46   | 2.08E-08   | -0.00074  | 9.84E-09 | decreasing     | 0          |
| <i>LUZP1</i>    | BA46   | 2.96E-13   | 0.000807  | 2.13E-10 | increasing     | 0          |
| <i>LUZP2</i>    | BA46   | 1.35E-10   | -0.00082  | 2.16E-10 | decreasing     | 1          |
| <i>LYN</i>      | BA46   | 1.94E-08   | -0.00076  | 7.86E-09 | decreasing     | 0          |
| <i>LYPD6</i>    | BA46   | 4.71E-05   | -0.00072  | 1.14E-07 | decreasing     | 0          |
| <i>LYPD6B</i>   | BA46   | 1.10E-08   | -0.00013  | 0.37541  | other          | 0          |
| <i>LYST</i>     | BA46   | 6.02E-10   | 0.000774  | 1.46E-09 | increasing     | 0          |
| <i>MACROD1</i>  | BA46   | 3.61E-06   | 0.000709  | 2.23E-07 | increasing     | 0          |
| <i>MAF</i>      | BA46   | 6.07E-10   | -0.00074  | 1.44E-08 | decreasing     | 0          |
| <i>MAG</i>      | BA46   | 4.93E-10   | 0.000764  | 2.96E-09 | increasing     | 0          |
| <i>MAG11</i>    | BA46   | 8.62E-07   | -0.00072  | 1.25E-07 | decreasing     | 0          |
| <i>MAN2A2</i>   | BA46   | 1.01E-14   | 0.000868  | 8.87E-13 | increasing     | 0          |
| <i>MAN2C1</i>   | BA46   | 1.67E-12   | 0.00084   | 8.33E-12 | increasing     | 0          |
| <i>MAP1S</i>    | BA46   | 1.19E-08   | 0.000727  | 4.47E-08 | increasing     | 0          |
| <i>MAP2K1</i>   | BA46   | 1.21E-07   | 0.00075   | 2.02E-08 | increasing     | 0          |
| <i>MAP3K6</i>   | BA46   | 7.80E-14   | 0.000819  | 7.12E-11 | increasing     | 0          |
| <i>MAP4K2</i>   | BA46   | 6.83E-09   | 0.000711  | 1.51E-07 | increasing     | 0          |
| <i>MAP6D1</i>   | BA46   | 4.54E-08   | 0.000755  | 1.14E-08 | increasing     | 0          |
| <i>MAP7</i>     | BA46   | 4.78E-12   | 0.000801  | 2.16E-10 | increasing     | 0          |
| <i>MAP7D2</i>   | BA46   | 6.15E-08   | 0.000735  | 4.99E-08 | increasing     | 0          |
| <i>MAPK10</i>   | BA46   | 1.91E-07   | 0.000709  | 9.56E-08 | increasing     | 0          |
| <i>MAPK11</i>   | BA46   | 3.08E-08   | -0.00019  | 0.201367 | other          | 0          |
| <i>MAPK3</i>    | BA46   | 1.84E-07   | 0.000579  | 2.88E-05 | increasing     | 0          |
| <i>MAPK8</i>    | BA46   | 1.55E-11   | -0.00072  | 3.60E-08 | decreasing     | 0          |
| <i>MAPK8IP3</i> | BA46   | 5.16E-07   | 0.000741  | 2.96E-08 | increasing     | 0          |
| <i>MAPK9</i>    | BA46   | 4.03E-08   | 7.21E-05  | 0.627106 | other          | 0          |
| <i>MAPKAPK2</i> | BA46   | 1.19E-09   | -0.00079  | 9.47E-10 | decreasing     | 0          |
| <i>MAPRE1</i>   | BA46   | 1.73E-16   | -0.00086  | 2.17E-12 | decreasing     | 0          |
| <i>MARCH1</i>   | BA46   | 7.13E-09   | -0.00062  | 5.89E-06 | decreasing     | 0          |



**Supplementary Table 9. Genes with a significant age effect from either ANOVA or linear regression. Beta is the regression coefficient, Pval is the p-value for the regression coefficient of expression on age (in days). Effect category is increasing if beta is positive and significant, decreasing if beta is negative and significant, and other if the ANOVA were significant rather than the linear regression. Local eQTL is 1 if the gene had a significant local eQTL**

| Gene            | Tissue | Anova.pval | Beta     | Pval     | EffectCategory | Local eQTL |
|-----------------|--------|------------|----------|----------|----------------|------------|
| <i>MARCH4</i>   | BA46   | 6.06E-14   | -0.00087 | 4.27E-13 | decreasing     | 0          |
| <i>MARCH8</i>   | BA46   | 2.15E-11   | 0.000784 | 4.93E-10 | increasing     | 0          |
| <i>MARCKS</i>   | BA46   | 1.12E-09   | -0.00069 | 2.34E-07 | decreasing     | 0          |
| <i>MARCKSL1</i> | BA46   | 5.62E-12   | -0.00071 | 6.52E-08 | decreasing     | 0          |
| <i>MARVELD1</i> | BA46   | 7.72E-09   | -0.00077 | 2.26E-09 | decreasing     | 0          |
| <i>MASP1</i>    | BA46   | 1.15E-07   | -0.00065 | 6.85E-07 | decreasing     | 0          |
| <i>MAST2</i>    | BA46   | 8.39E-13   | -0.00077 | 1.43E-09 | decreasing     | 0          |
| <i>MAST3</i>    | BA46   | 5.08E-08   | -0.00016 | 0.294123 | other          | 0          |
| <i>MATN3</i>    | BA46   | 4.29E-12   | -0.0008  | 2.42E-10 | decreasing     | 0          |
| <i>MATN4</i>    | BA46   | 2.13E-07   | 0.000747 | 2.94E-08 | increasing     | 0          |
| <i>MAZ</i>      | BA46   | 7.80E-11   | -0.00082 | 6.94E-11 | decreasing     | 0          |
| <i>MBLAC2</i>   | BA46   | 1.86E-07   | 4.87E-05 | 0.747402 | other          | 0          |
| <i>MBNL1</i>    | BA46   | 4.62E-08   | 0.000604 | 9.56E-06 | increasing     | 0          |
| <i>MBNL2</i>    | BA46   | 1.17E-18   | 0.000894 | 1.90E-14 | increasing     | 0          |
| <i>MBOAT2</i>   | BA46   | 3.40E-06   | -0.00074 | 4.72E-08 | decreasing     | 0          |
| <i>MBP</i>      | BA46   | 1.63E-11   | 0.00078  | 9.56E-10 | increasing     | 0          |
| <i>MBTPS1</i>   | BA46   | 9.12E-08   | 0.00067  | 1.16E-06 | increasing     | 0          |
| <i>MCM6</i>     | BA46   | 9.47E-09   | 0.000124 | 0.407121 | other          | 0          |
| <i>MCOLN1</i>   | BA46   | 4.14E-06   | -0.00069 | 2.42E-07 | decreasing     | 0          |
| <i>MDGA1</i>    | BA46   | 1.60E-07   | -0.00061 | 1.59E-05 | decreasing     | 0          |
| <i>MDN1</i>     | BA46   | 2.05E-07   | 0.000739 | 4.12E-08 | increasing     | 1          |
| <i>ME2</i>      | BA46   | 8.34E-08   | -0.00065 | 2.83E-06 | decreasing     | 0          |
| <i>MEF2C</i>    | BA46   | 6.33E-08   | -0.00051 | 0.000305 | other          | 0          |
| <i>MEIS3</i>    | BA46   | 1.08E-11   | -0.00069 | 3.60E-07 | decreasing     | 0          |
| <i>MEMO1</i>    | BA46   | 6.39E-07   | -0.00077 | 4.18E-09 | decreasing     | 0          |
| <i>MEOX1</i>    | BA46   | 9.14E-09   | -0.00052 | 1.26E-05 | decreasing     | 0          |
| <i>MET</i>      | BA46   | 7.45E-05   | -0.00071 | 2.31E-07 | decreasing     | 0          |
| <i>MEX3A</i>    | BA46   | 1.15E-07   | -0.00053 | 0.000142 | other          | 0          |
| <i>MEX3B</i>    | BA46   | 7.65E-15   | -0.00082 | 2.42E-11 | decreasing     | 0          |
| <i>MFSD2A</i>   | BA46   | 1.56E-07   | -0.00068 | 6.41E-07 | decreasing     | 0          |
| <i>MFSD4</i>    | BA46   | 2.87E-10   | 0.000234 | 0.113219 | other          | 0          |
| <i>MGAT4B</i>   | BA46   | 4.75E-07   | -0.00069 | 2.02E-07 | decreasing     | 0          |
| <i>MGLL</i>     | BA46   | 8.77E-11   | -0.00064 | 3.02E-06 | decreasing     | 0          |
| <i>MICAL2</i>   | BA46   | 3.34E-09   | -0.00079 | 1.27E-09 | decreasing     | 0          |
| <i>MID1</i>     | BA46   | 6.25E-08   | -0.00069 | 5.04E-07 | decreasing     | 0          |
| <i>MID2</i>     | BA46   | 3.27E-06   | 0.000711 | 1.80E-07 | increasing     | 0          |
| <i>MKI67</i>    | BA46   | 4.45E-08   | -0.0006  | 1.20E-05 | decreasing     | 0          |
| <i>MKL2</i>     | BA46   | 2.66E-08   | 0.000232 | 0.113823 | other          | 0          |
| <i>MKRN3</i>    | BA46   | 1.46E-22   | -0.00091 | 3.58E-15 | decreasing     | 0          |
| <i>MKX</i>      | BA46   | 5.21E-08   | 0.000365 | 0.012587 | other          | 0          |

**Supplementary Table 9. Genes with a significant age effect from either ANOVA or linear regression. Beta is the regression coefficient, Pval is the p-value for the regression coefficient of expression on age (in days). Effect category is increasing if beta is positive and significant, decreasing if beta is negative and significant, and other if the ANOVA were significant rather than the linear regression. Local eQTL is 1 if the gene had a significant local eQTL**

| Gene            | Tissue | Anova.pval | Beta     | Pval     | EffectCategory | Local eQTL |
|-----------------|--------|------------|----------|----------|----------------|------------|
| <i>MLLT4</i>    | BA46   | 7.94E-16   | -0.00085 | 4.22E-12 | decreasing     | 0          |
| <i>MLXIPL</i>   | BA46   | 6.31E-13   | -0.00066 | 2.01E-06 | decreasing     | 0          |
| <i>MMD</i>      | BA46   | 1.16E-19   | -0.0009  | 3.42E-14 | decreasing     | 0          |
| <i>MN1</i>      | BA46   | 6.61E-07   | -0.00076 | 1.26E-08 | decreasing     | 0          |
| <i>MOB1B</i>    | BA46   | 1.94E-09   | -0.00073 | 3.52E-08 | decreasing     | 0          |
| <i>MOB3B</i>    | BA46   | 2.58E-09   | -0.00043 | 0.002437 | other          | 0          |
| <i>MOG</i>      | BA46   | 1.37E-11   | 0.000788 | 8.83E-10 | increasing     | 0          |
| <i>MPDZ</i>     | BA46   | 9.57E-13   | 0.000783 | 8.17E-10 | increasing     | 0          |
| <i>MPHOSPH8</i> | BA46   | 1.11E-10   | 0.000755 | 5.19E-09 | increasing     | 0          |
| <i>MPP1</i>     | BA46   | 5.19E-15   | 0.000865 | 2.06E-12 | increasing     | 0          |
| <i>MPP3</i>     | BA46   | 2.31E-11   | -0.00078 | 5.22E-10 | decreasing     | 1          |
| <i>MPP4</i>     | BA46   | 1.36E-08   | 8.46E-06 | 0.954033 | other          | 0          |
| <i>MPP5</i>     | BA46   | 5.29E-09   | 0.000722 | 2.87E-08 | increasing     | 0          |
| <i>MPP6</i>     | BA46   | 1.97E-05   | -0.00071 | 1.69E-07 | decreasing     | 0          |
| <i>MPP7</i>     | BA46   | 2.29E-13   | 0.000697 | 7.29E-08 | increasing     | 0          |
| <i>MPPED1</i>   | BA46   | 3.61E-09   | -0.00073 | 2.44E-08 | decreasing     | 0          |
| <i>MPRIP</i>    | BA46   | 2.57E-08   | -0.00039 | 0.006455 | other          | 0          |
| <i>MPZL1</i>    | BA46   | 3.10E-06   | -0.00072 | 5.23E-08 | decreasing     | 1          |
| <i>MRC1</i>     | BA46   | 6.15E-08   | -0.00077 | 3.77E-09 | decreasing     | 0          |
| <i>MREG</i>     | BA46   | 1.72E-07   | -0.00035 | 0.014847 | other          | 0          |
| <i>MRPS30</i>   | BA46   | 4.30E-07   | 0.000709 | 3.84E-08 | increasing     | 0          |
| <i>MSANTD3</i>  | BA46   | 1.74E-07   | -0.00049 | 0.000557 | other          | 0          |
| <i>MSRA</i>     | BA46   | 8.06E-08   | -0.00072 | 3.60E-08 | decreasing     | 0          |
| <i>MTHFD2L</i>  | BA46   | 1.17E-09   | 0.000797 | 9.35E-10 | increasing     | 0          |
| <i>MTPN</i>     | BA46   | 2.33E-09   | -0.00073 | 4.98E-08 | decreasing     | 0          |
| <i>MTSS1</i>    | BA46   | 7.95E-08   | -0.00054 | 9.05E-05 | decreasing     | 0          |
| <i>MXI1</i>     | BA46   | 2.96E-09   | 0.000689 | 2.31E-07 | increasing     | 0          |
| <i>MYBBP1A</i>  | BA46   | 1.44E-08   | 0.000751 | 1.14E-08 | increasing     | 0          |
| <i>MYCN</i>     | BA46   | 5.40E-09   | -0.00058 | 2.50E-05 | decreasing     | 0          |
| <i>MYH13</i>    | BA46   | 4.31E-09   | 0.000551 | 8.04E-05 | increasing     | 0          |
| <i>MYL10</i>    | BA46   | 4.00E-10   | 0.0001   | 0.498227 | other          | 0          |
| <i>MYLIP</i>    | BA46   | 3.86E-12   | -0.00077 | 1.85E-09 | decreasing     | 0          |
| <i>MYLK</i>     | BA46   | 2.85E-16   | 0.000784 | 2.37E-10 | increasing     | 0          |
| <i>MYO16</i>    | BA46   | 1.46E-27   | -0.00092 | 1.07E-15 | decreasing     | 0          |
| <i>MYO1B</i>    | BA46   | 7.97E-06   | -0.0007  | 2.04E-07 | decreasing     | 0          |
| <i>MYO5B</i>    | BA46   | 5.17E-14   | -0.00073 | 8.60E-09 | decreasing     | 0          |
| <i>MYO5C</i>    | BA46   | 1.80E-07   | 0.000657 | 1.46E-06 | increasing     | 0          |
| <i>MYRF</i>     | BA46   | 9.79E-10   | 0.000808 | 2.07E-10 | increasing     | 0          |
| <i>N4BP2</i>    | BA46   | 2.24E-07   | 0.000178 | 0.227442 | other          | 0          |
| <i>N4BP2L1</i>  | BA46   | 9.61E-11   | 0.00081  | 6.77E-11 | increasing     | 0          |

**Supplementary Table 9. Genes with a significant age effect from either ANOVA or linear regression. Beta is the regression coefficient, Pval is the p-value for the regression coefficient of expression on age (in days). Effect category is increasing if beta is positive and significant, decreasing if beta is negative and significant, and other if the ANOVA were significant rather than the linear regression. Local eQTL is 1 if the gene had a significant local eQTL**

| Gene           | Tissue | Anova.pval | Beta     | Pval     | EffectCategory | Local eQTL |
|----------------|--------|------------|----------|----------|----------------|------------|
| <i>N4BP3</i>   | BA46   | 2.16E-07   | -0.00064 | 1.82E-06 | decreasing     | 0          |
| <i>NAA60</i>   | BA46   | 1.81E-09   | -0.0008  | 9.19E-10 | decreasing     | 0          |
| <i>NAB1</i>    | BA46   | 1.38E-05   | 0.000711 | 1.82E-07 | increasing     | 0          |
| <i>NADK</i>    | BA46   | 1.90E-08   | -0.00082 | 2.99E-10 | decreasing     | 0          |
| <i>NAP1L5</i>  | BA46   | 7.29E-08   | 0.000265 | 0.072216 | other          | 0          |
| <i>NAPEPLD</i> | BA46   | 1.38E-16   | 0.000885 | 1.56E-13 | increasing     | 0          |
| <i>NASP</i>    | BA46   | 1.89E-12   | -0.00078 | 1.97E-09 | decreasing     | 0          |
| <i>NAV1</i>    | BA46   | 3.09E-14   | -0.00086 | 1.61E-12 | decreasing     | 0          |
| <i>NAV2</i>    | BA46   | 2.40E-07   | -0.00068 | 2.31E-07 | decreasing     | 0          |
| <i>NAV3</i>    | BA46   | 1.19E-06   | -0.00072 | 5.30E-08 | decreasing     | 0          |
| <i>NBEA</i>    | BA46   | 1.84E-07   | -0.00067 | 2.47E-07 | decreasing     | 0          |
| <i>NCAN</i>    | BA46   | 3.29E-08   | -0.00071 | 1.06E-07 | decreasing     | 0          |
| <i>NCDN</i>    | BA46   | 7.72E-10   | 0.000815 | 2.82E-10 | increasing     | 0          |
| <i>NCKAP1L</i> | BA46   | 7.51E-08   | -0.00076 | 1.07E-08 | decreasing     | 0          |
| <i>NCKIPSD</i> | BA46   | 1.21E-21   | 0.0009   | 2.30E-15 | increasing     | 0          |
| <i>NCOR1</i>   | BA46   | 2.02E-07   | -0.00074 | 3.63E-08 | decreasing     | 0          |
| <i>NDRG1</i>   | BA46   | 1.30E-08   | -0.00064 | 2.80E-06 | decreasing     | 0          |
| <i>NDRG2</i>   | BA46   | 9.10E-08   | 9.12E-05 | 0.538782 | other          | 0          |
| <i>NDUFB9</i>  | BA46   | 6.06E-09   | 0.000613 | 6.60E-06 | increasing     | 0          |
| <i>NECAB1</i>  | BA46   | 6.66E-11   | 0.000817 | 5.91E-11 | increasing     | 0          |
| <i>NEFH</i>    | BA46   | 1.81E-09   | 0.0008   | 5.03E-10 | increasing     | 0          |
| <i>NEFM</i>    | BA46   | 2.00E-07   | 0.000673 | 8.53E-07 | increasing     | 0          |
| <i>NEK10</i>   | BA46   | 2.38E-09   | -0.00072 | 6.89E-08 | decreasing     | 1          |
| <i>NETO2</i>   | BA46   | 2.57E-10   | -0.00079 | 6.68E-10 | decreasing     | 0          |
| <i>NEURL1B</i> | BA46   | 1.79E-17   | -0.00089 | 3.29E-14 | decreasing     | 0          |
| <i>NFIB</i>    | BA46   | 3.40E-08   | -0.00077 | 7.54E-09 | decreasing     | 0          |
| <i>NGB</i>     | BA46   | 9.10E-07   | 0.000722 | 1.11E-07 | increasing     | 0          |
| <i>NHSL2</i>   | BA46   | 8.14E-08   | 0.000637 | 1.62E-06 | increasing     | 0          |
| <i>NIN</i>     | BA46   | 4.51E-10   | -0.00042 | 0.003556 | other          | 0          |
| <i>NISCH</i>   | BA46   | 2.32E-08   | 0.000772 | 2.20E-09 | increasing     | 0          |
| <i>NKAIN2</i>  | BA46   | 6.70E-10   | -0.00071 | 5.87E-08 | decreasing     | 0          |
| <i>NKD1</i>    | BA46   | 1.94E-07   | -0.00074 | 3.88E-08 | decreasing     | 0          |
| <i>NKIRAS2</i> | BA46   | 3.87E-16   | -0.00086 | 2.91E-12 | decreasing     | 0          |
| <i>NKX3.1</i>  | BA46   | 3.63E-08   | 0.000766 | 2.25E-09 | increasing     | 0          |
| <i>NKX6.2</i>  | BA46   | 3.51E-13   | 0.000757 | 8.43E-09 | increasing     | 0          |
| <i>NLGN1</i>   | BA46   | 1.31E-10   | -0.00078 | 2.30E-09 | decreasing     | 0          |
| <i>NME7</i>    | BA46   | 5.98E-08   | -0.00066 | 1.78E-06 | decreasing     | 0          |
| <i>NOL4</i>    | BA46   | 7.63E-09   | -0.00077 | 4.75E-09 | decreasing     | 0          |
| <i>NPBWR1</i>  | BA46   | 7.53E-14   | -0.00082 | 1.14E-11 | decreasing     | 0          |
| <i>NPBWR2</i>  | BA46   | 7.85E-09   | 0.000662 | 8.82E-07 | increasing     | 0          |

**Supplementary Table 9. Genes with a significant age effect from either ANOVA or linear regression. Beta is the regression coefficient, Pval is the p-value for the regression coefficient of expression on age (in days). Effect category is increasing if beta is positive and significant, decreasing if beta is negative and significant, and other if the ANOVA were significant rather than the linear regression. Local eQTL is 1 if the gene had a significant local eQTL**

| Gene          | Tissue | Anova.pval | Beta     | Pval     | EffectCategory | Local eQTL |
|---------------|--------|------------|----------|----------|----------------|------------|
| <i>NPHP3</i>  | BA46   | 7.83E-08   | 0.000651 | 1.87E-06 | increasing     | 0          |
| <i>NPR3</i>   | BA46   | 5.03E-08   | -0.00063 | 4.46E-06 | decreasing     | 0          |
| <i>NPTX1</i>  | BA46   | 1.26E-15   | 0.000855 | 4.13E-12 | increasing     | 0          |
| <i>NPY1R</i>  | BA46   | 1.76E-07   | -0.00067 | 6.10E-07 | decreasing     | 0          |
| <i>NR1H2</i>  | BA46   | 3.80E-11   | 0.000787 | 1.11E-09 | increasing     | 0          |
| <i>NR2C2</i>  | BA46   | 6.42E-08   | -0.00061 | 1.02E-05 | decreasing     | 0          |
| <i>NR3C1</i>  | BA46   | 2.32E-16   | 0.000783 | 5.33E-10 | increasing     | 0          |
| <i>NR3C2</i>  | BA46   | 2.88E-19   | 0.000892 | 2.32E-14 | increasing     | 0          |
| <i>NRAS</i>   | BA46   | 6.22E-12   | -0.00078 | 1.30E-09 | decreasing     | 0          |
| <i>NREP</i>   | BA46   | 1.38E-15   | -0.00087 | 2.95E-13 | decreasing     | 0          |
| <i>NRG3</i>   | BA46   | 3.11E-06   | -0.00073 | 4.05E-08 | decreasing     | 0          |
| <i>NRG4</i>   | BA46   | 1.07E-07   | 0.000794 | 1.05E-09 | increasing     | 0          |
| <i>NRP1</i>   | BA46   | 8.16E-07   | -0.00074 | 2.11E-08 | decreasing     | 0          |
| <i>NRXN1</i>  | BA46   | 9.65E-11   | -0.00072 | 3.56E-08 | decreasing     | 0          |
| <i>NRXN2</i>  | BA46   | 6.63E-11   | -0.00083 | 2.11E-11 | decreasing     | 0          |
| <i>NRXN3</i>  | BA46   | 3.83E-08   | -0.00057 | 6.08E-05 | decreasing     | 0          |
| <i>NSD1</i>   | BA46   | 2.97E-08   | -0.00066 | 9.79E-07 | decreasing     | 0          |
| <i>NSF</i>    | BA46   | 1.29E-07   | 0.000636 | 2.42E-06 | increasing     | 0          |
| <i>NT5C1A</i> | BA46   | 6.77E-07   | 0.000759 | 1.25E-08 | increasing     | 0          |
| <i>NT5DC1</i> | BA46   | 1.63E-08   | 0.000637 | 3.15E-06 | increasing     | 0          |
| <i>NT5DC2</i> | BA46   | 1.14E-07   | -0.00026 | 0.082196 | other          | 0          |
| <i>NTM</i>    | BA46   | 1.46E-10   | -0.00082 | 2.10E-10 | decreasing     | 0          |
| <i>NTNG1</i>  | BA46   | 5.50E-08   | -0.00079 | 2.02E-09 | decreasing     | 0          |
| <i>NTSR1</i>  | BA46   | 8.97E-08   | -0.00063 | 3.01E-06 | decreasing     | 0          |
| <i>NTSR2</i>  | BA46   | 3.39E-11   | 0.000694 | 2.11E-07 | increasing     | 0          |
| <i>NUB1</i>   | BA46   | 6.75E-07   | 0.00072  | 1.97E-08 | increasing     | 0          |
| <i>NUDT3</i>  | BA46   | 5.97E-10   | -0.00054 | 9.89E-05 | decreasing     | 0          |
| <i>NUMA1</i>  | BA46   | 7.23E-11   | 0.000854 | 1.51E-11 | increasing     | 0          |
| <i>NUP93</i>  | BA46   | 1.28E-07   | 0.00021  | 0.148046 | other          | 0          |
| <i>NWD2</i>   | BA46   | 1.94E-15   | -0.00086 | 1.24E-12 | decreasing     | 0          |
| <i>NYAP2</i>  | BA46   | 1.66E-10   | -0.0008  | 5.15E-10 | decreasing     | 0          |
| <i>OBSCN</i>  | BA46   | 1.00E-07   | 0.000511 | 0.000296 | other          | 1          |
| <i>OGDHL</i>  | BA46   | 4.41E-13   | 0.000812 | 1.54E-10 | increasing     | 0          |
| <i>OLFM2</i>  | BA46   | 6.14E-08   | -0.00079 | 1.88E-09 | decreasing     | 0          |
| <i>OPALIN</i> | BA46   | 2.14E-11   | 0.000773 | 1.58E-09 | increasing     | 0          |
| <i>OPRK1</i>  | BA46   | 1.23E-09   | 0.000116 | 0.426435 | other          | 0          |
| <i>OSBPL6</i> | BA46   | 1.88E-11   | -0.00044 | 0.002966 | other          | 0          |
| <i>OTUB2</i>  | BA46   | 1.67E-07   | -0.00055 | 7.01E-05 | decreasing     | 0          |
| <i>P2RX7</i>  | BA46   | 3.20E-09   | 0.000738 | 1.87E-08 | increasing     | 0          |
| <i>P2RY12</i> | BA46   | 9.68E-09   | -0.00081 | 3.69E-10 | decreasing     | 0          |

**Supplementary Table 9. Genes with a significant age effect from either ANOVA or linear regression. Beta is the regression coefficient, Pval is the p-value for the regression coefficient of expression on age (in days). Effect category is increasing if beta is positive and significant, decreasing if beta is negative and significant, and other if the ANOVA were significant rather than the linear regression. Local eQTL is 1 if the gene had a significant local eQTL**

| Gene            | Tissue | Anova.pval | Beta      | Pval     | EffectCategory | Local eQTL |
|-----------------|--------|------------|-----------|----------|----------------|------------|
| <i>P4HTM</i>    | BA46   | 8.03E-07   | 0.000757  | 1.57E-08 | increasing     | 0          |
| <i>PABPC1</i>   | BA46   | 1.02E-09   | -0.00081  | 1.70E-10 | decreasing     | 0          |
| <i>PABPC5</i>   | BA46   | 1.09E-07   | -0.00049  | 0.000537 | other          | 0          |
| <i>PAC SIN1</i> | BA46   | 3.08E-08   | -0.00039  | 0.006945 | other          | 0          |
| <i>PAC SIN2</i> | BA46   | 2.17E-08   | -0.00034  | 0.02238  | other          | 0          |
| <i>PAC SIN3</i> | BA46   | 1.53E-07   | -0.00061  | 8.82E-06 | decreasing     | 0          |
| <i>PAK3</i>     | BA46   | 6.40E-09   | -0.00066  | 1.58E-06 | decreasing     | 0          |
| <i>PAK6</i>     | BA46   | 1.21E-08   | -0.00081  | 3.54E-10 | decreasing     | 0          |
| <i>PALMD</i>    | BA46   | 1.57E-07   | -0.00051  | 0.000327 | other          | 0          |
| <i>PAM</i>      | BA46   | 1.20E-09   | 0.000753  | 4.28E-09 | increasing     | 0          |
| <i>PAMR1</i>    | BA46   | 2.42E-07   | 8.37E-05  | 0.5754   | other          | 0          |
| <i>PANK3</i>    | BA46   | 2.20E-08   | -0.0007   | 1.62E-07 | decreasing     | 0          |
| <i>PANX1</i>    | BA46   | 7.57E-08   | 0.000274  | 0.060886 | other          | 0          |
| <i>PAPPA2</i>   | BA46   | 3.50E-08   | -0.0005   | 0.00037  | other          | 0          |
| <i>PAPSS2</i>   | BA46   | 1.51E-08   | 0.000639  | 3.40E-06 | increasing     | 0          |
| <i>PARP6</i>    | BA46   | 1.21E-09   | -0.00075  | 6.81E-09 | decreasing     | 1          |
| <i>PASK</i>     | BA46   | 2.73E-11   | -0.00057  | 6.08E-05 | decreasing     | 0          |
| <i>PC</i>       | BA46   | 7.24E-11   | 0.000774  | 1.52E-09 | increasing     | 0          |
| <i>PCBD1</i>    | BA46   | 1.72E-08   | 0.00072   | 1.88E-08 | increasing     | 0          |
| <i>PCDH10</i>   | BA46   | 1.98E-07   | -0.00061  | 9.49E-06 | decreasing     | 0          |
| <i>PCDH11X</i>  | BA46   | 4.56E-19   | -0.00089  | 9.76E-14 | decreasing     | 0          |
| <i>PCDH15</i>   | BA46   | 1.09E-17   | -0.00088  | 4.80E-14 | decreasing     | 0          |
| <i>PCDH20</i>   | BA46   | 4.55E-11   | -0.00074  | 4.37E-09 | decreasing     | 0          |
| <i>PCDH7</i>    | BA46   | 3.38E-10   | -2.14E-05 | 0.885408 | other          | 0          |
| <i>PCDHB14</i>  | BA46   | 1.07E-11   | -0.00081  | 1.34E-10 | decreasing     | 0          |
| <i>PCGF3</i>    | BA46   | 1.23E-06   | -0.00074  | 2.52E-08 | decreasing     | 0          |
| <i>PCNXL2</i>   | BA46   | 1.39E-09   | -0.00014  | 0.339208 | other          | 0          |
| <i>PCNXL4</i>   | BA46   | 1.13E-07   | -0.00067  | 6.77E-07 | decreasing     | 0          |
| <i>PCSK5</i>    | BA46   | 9.72E-11   | -0.00076  | 2.21E-09 | decreasing     | 0          |
| <i>PDCD2</i>    | BA46   | 9.66E-06   | -0.0007   | 2.52E-07 | decreasing     | 0          |
| <i>PDE1A</i>    | BA46   | 3.16E-07   | 0.000709  | 2.20E-07 | increasing     | 0          |
| <i>PDE1B</i>    | BA46   | 2.85E-10   | 0.000717  | 5.13E-08 | increasing     | 0          |
| <i>PDE2A</i>    | BA46   | 1.28E-07   | -0.00028  | 0.062611 | other          | 0          |
| <i>PDE3A</i>    | BA46   | 1.63E-09   | -0.00079  | 1.26E-09 | decreasing     | 0          |
| <i>PDE8B</i>    | BA46   | 7.79E-09   | 5.71E-05  | 0.700668 | other          | 0          |
| <i>PDGFRA</i>   | BA46   | 4.98E-18   | -0.00087  | 1.23E-12 | decreasing     | 0          |
| <i>PDIA5</i>    | BA46   | 4.20E-08   | -0.00054  | 0.000123 | other          | 0          |
| <i>PDIA6</i>    | BA46   | 5.11E-09   | -0.00075  | 6.69E-09 | decreasing     | 0          |
| <i>PDK1</i>     | BA46   | 1.63E-09   | 0.000672  | 2.93E-07 | increasing     | 0          |
| <i>PDK2</i>     | BA46   | 8.80E-08   | 0.000528  | 0.000173 | other          | 0          |

**Supplementary Table 9. Genes with a significant age effect from either ANOVA or linear regression. Beta is the regression coefficient, Pval is the p-value for the regression coefficient of expression on age (in days). Effect category is increasing if beta is positive and significant, decreasing if beta is negative and significant, and other if the ANOVA were significant rather than the linear regression. Local eQTL is 1 if the gene had a significant local eQTL**

| Gene           | Tissue | Anova.pval | Beta     | Pval     | EffectCategory | Local eQTL |
|----------------|--------|------------|----------|----------|----------------|------------|
| <i>PDK3</i>    | BA46   | 3.17E-09   | 0.0002   | 0.175543 | other          | 0          |
| <i>PDLIM2</i>  | BA46   | 8.08E-07   | 0.000726 | 4.40E-08 | increasing     | 1          |
| <i>PDZD2</i>   | BA46   | 4.74E-12   | 0.000777 | 1.82E-09 | increasing     | 0          |
| <i>PDZD4</i>   | BA46   | 1.71E-07   | -0.00036 | 0.014305 | other          | 0          |
| <i>PDZRN3</i>  | BA46   | 1.35E-13   | -0.00083 | 2.58E-11 | decreasing     | 0          |
| <i>PEA15</i>   | BA46   | 1.94E-08   | 0.000645 | 2.21E-06 | increasing     | 0          |
| <i>PEAK1</i>   | BA46   | 5.38E-09   | 0.000315 | 0.030664 | other          | 0          |
| <i>PEG3</i>    | BA46   | 1.09E-07   | 0.000793 | 1.67E-09 | increasing     | 0          |
| <i>PELI1</i>   | BA46   | 1.34E-08   | -0.00034 | 0.021767 | other          | 0          |
| <i>PELI3</i>   | BA46   | 1.09E-09   | 0.000749 | 1.63E-08 | increasing     | 0          |
| <i>PEX5L</i>   | BA46   | 7.25E-08   | -0.00026 | 0.085248 | other          | 0          |
| <i>PFKFB3</i>  | BA46   | 4.63E-08   | -0.00012 | 0.422415 | other          | 0          |
| <i>PFKP</i>    | BA46   | 2.01E-12   | 0.000826 | 2.78E-11 | increasing     | 0          |
| <i>PGBD5</i>   | BA46   | 2.11E-09   | 0.000138 | 0.35785  | other          | 0          |
| <i>PHACTR1</i> | BA46   | 3.96E-08   | -0.00057 | 5.41E-05 | decreasing     | 0          |
| <i>PHACTR3</i> | BA46   | 1.02E-07   | -0.00062 | 7.73E-06 | decreasing     | 0          |
| <i>PHF1</i>    | BA46   | 8.10E-08   | 0.000703 | 1.31E-07 | increasing     | 0          |
| <i>PHF14</i>   | BA46   | 1.33E-11   | -0.00077 | 2.48E-09 | decreasing     | 0          |
| <i>PHF20L1</i> | BA46   | 2.25E-07   | -0.00078 | 2.41E-09 | decreasing     | 0          |
| <i>PHF21A</i>  | BA46   | 6.38E-12   | 0.000774 | 5.32E-10 | increasing     | 0          |
| <i>PHKA1</i>   | BA46   | 2.34E-06   | -0.00076 | 1.63E-08 | decreasing     | 0          |
| <i>PHYHD1</i>  | BA46   | 1.18E-07   | 0.000728 | 2.78E-08 | increasing     | 0          |
| <i>PHYHIP</i>  | BA46   | 1.73E-07   | 0.000608 | 1.05E-05 | increasing     | 0          |
| <i>PI4KA</i>   | BA46   | 1.62E-09   | 0.000607 | 1.10E-05 | increasing     | 0          |
| <i>PIEZO2</i>  | BA46   | 1.79E-08   | -0.00066 | 6.56E-07 | decreasing     | 0          |
| <i>PIK3C2B</i> | BA46   | 1.04E-11   | -0.00075 | 5.80E-09 | decreasing     | 0          |
| <i>PIP4K2A</i> | BA46   | 7.07E-11   | 0.00082  | 6.66E-11 | increasing     | 0          |
| <i>PIP4K2C</i> | BA46   | 1.54E-08   | 0.000712 | 8.33E-08 | increasing     | 0          |
| <i>PIP5K1C</i> | BA46   | 1.88E-07   | -0.0004  | 0.005822 | other          | 0          |
| <i>PISD</i>    | BA46   | 6.11E-07   | 0.000782 | 2.59E-09 | increasing     | 0          |
| <i>PITHD1</i>  | BA46   | 1.65E-08   | 0.000779 | 1.35E-09 | increasing     | 0          |
| <i>PITPNC1</i> | BA46   | 4.27E-15   | -0.00086 | 1.99E-12 | decreasing     | 0          |
| <i>PIWIL1</i>  | BA46   | 8.15E-11   | -0.00076 | 1.75E-09 | decreasing     | 0          |
| <i>PKN1</i>    | BA46   | 1.40E-09   | -0.00054 | 9.27E-05 | decreasing     | 0          |
| <i>PKP1</i>    | BA46   | 1.73E-05   | -0.00073 | 5.98E-08 | decreasing     | 0          |
| <i>PKP4</i>    | BA46   | 4.26E-12   | -0.00084 | 1.10E-11 | decreasing     | 0          |
| <i>PLA2G15</i> | BA46   | 1.64E-08   | -0.00071 | 9.99E-08 | decreasing     | 0          |
| <i>PLA2G16</i> | BA46   | 1.24E-09   | 0.00076  | 2.64E-09 | increasing     | 0          |
| <i>PLAG1</i>   | BA46   | 5.79E-09   | 0.000714 | 8.34E-08 | increasing     | 0          |
| <i>PLCD3</i>   | BA46   | 2.58E-09   | -0.00071 | 2.51E-07 | decreasing     | 0          |

**Supplementary Table 9. Genes with a significant age effect from either ANOVA or linear regression. Beta is the regression coefficient, Pval is the p-value for the regression coefficient of expression on age (in days). Effect category is increasing if beta is positive and significant, decreasing if beta is negative and significant, and other if the ANOVA were significant rather than the linear regression. Local eQTL is 1 if the gene had a significant local eQTL**

| Gene            | Tissue | Anova.pval | Beta     | Pval     | EffectCategory | Local eQTL |
|-----------------|--------|------------|----------|----------|----------------|------------|
| <i>PLEK</i>     | BA46   | 6.75E-06   | 0.000714 | 7.43E-08 | increasing     | 0          |
| <i>PLEKHA1</i>  | BA46   | 1.93E-12   | 0.000843 | 6.39E-12 | increasing     | 0          |
| <i>PLEKHA2</i>  | BA46   | 2.43E-10   | 0.000803 | 5.51E-11 | increasing     | 0          |
| <i>PLEKHA5</i>  | BA46   | 2.66E-08   | -0.00035 | 0.017013 | other          | 0          |
| <i>PLEKHB1</i>  | BA46   | 1.03E-07   | 0.00056  | 3.95E-05 | increasing     | 0          |
| <i>PLEKHG3</i>  | BA46   | 2.29E-09   | 0.000767 | 3.02E-09 | increasing     | 0          |
| <i>PLEKHH1</i>  | BA46   | 2.46E-12   | 0.000802 | 1.97E-10 | increasing     | 0          |
| <i>PLP1</i>     | BA46   | 2.66E-10   | 0.000748 | 1.17E-08 | increasing     | 0          |
| <i>PLXDC1</i>   | BA46   | 9.50E-08   | -0.0005  | 0.000367 | other          | 0          |
| <i>PLXNB3</i>   | BA46   | 2.89E-11   | 0.000803 | 3.48E-10 | increasing     | 0          |
| <i>PLXND1</i>   | BA46   | 3.04E-08   | -0.00078 | 2.72E-09 | decreasing     | 0          |
| <i>PM20D2</i>   | BA46   | 7.19E-06   | 0.000719 | 1.34E-07 | increasing     | 0          |
| <i>PMEL</i>     | BA46   | 1.58E-07   | 0.000732 | 9.37E-09 | increasing     | 0          |
| <i>PMPCB</i>    | BA46   | 3.53E-07   | 0.000743 | 1.09E-08 | increasing     | 0          |
| <i>PNCK</i>     | BA46   | 5.27E-07   | 0.000722 | 9.22E-08 | increasing     | 0          |
| <i>PNKD</i>     | BA46   | 2.83E-17   | 0.00088  | 2.63E-14 | increasing     | 0          |
| <i>PNMAL1</i>   | BA46   | 1.96E-07   | 0.000659 | 1.74E-06 | increasing     | 0          |
| <i>PNMAL2</i>   | BA46   | 2.23E-07   | 0.00075  | 2.41E-08 | increasing     | 0          |
| <i>PNPLA2</i>   | BA46   | 1.20E-07   | 0.000718 | 6.79E-08 | increasing     | 0          |
| <i>PNPLA5</i>   | BA46   | 3.76E-05   | 0.000702 | 2.11E-07 | increasing     | 0          |
| <i>PNRC1</i>    | BA46   | 2.24E-16   | 0.000865 | 4.51E-13 | increasing     | 0          |
| <i>PODXL2</i>   | BA46   | 1.33E-07   | -0.00014 | 0.348717 | other          | 0          |
| <i>POLG</i>     | BA46   | 3.20E-06   | 0.000728 | 5.07E-08 | increasing     | 0          |
| <i>POPDC3</i>   | BA46   | 2.33E-08   | 0.000775 | 3.50E-09 | increasing     | 0          |
| <i>POSTN</i>    | BA46   | 1.21E-10   | -0.00073 | 9.23E-09 | decreasing     | 0          |
| <i>POU3F2</i>   | BA46   | 3.88E-07   | -0.00075 | 2.01E-08 | decreasing     | 0          |
| <i>POU3F3</i>   | BA46   | 2.08E-08   | -0.00078 | 2.22E-09 | decreasing     | 0          |
| <i>PPARD</i>    | BA46   | 2.11E-08   | -0.00021 | 0.153287 | other          | 0          |
| <i>PPARGC1A</i> | BA46   | 1.73E-06   | 0.000705 | 4.63E-08 | increasing     | 0          |
| <i>PPEF1</i>    | BA46   | 2.19E-11   | -0.0008  | 7.02E-11 | decreasing     | 0          |
| <i>PPFIA4</i>   | BA46   | 6.37E-09   | 0.000689 | 2.75E-07 | increasing     | 0          |
| <i>PIIP5K1</i>  | BA46   | 1.40E-10   | 0.000715 | 4.42E-08 | increasing     | 0          |
| <i>PPL</i>      | BA46   | 8.27E-12   | 0.000857 | 4.26E-12 | increasing     | 0          |
| <i>PPM1E</i>    | BA46   | 9.76E-13   | -0.00082 | 6.27E-11 | decreasing     | 0          |
| <i>PPM1K</i>    | BA46   | 5.08E-05   | 0.000707 | 2.17E-07 | increasing     | 0          |
| <i>PPP1R14C</i> | BA46   | 3.95E-13   | -0.00086 | 3.08E-12 | decreasing     | 0          |
| <i>PPP1R3C</i>  | BA46   | 1.54E-07   | -0.00023 | 0.113592 | other          | 0          |
| <i>PPP1R3E</i>  | BA46   | 2.25E-10   | 0.00081  | 2.14E-10 | increasing     | 0          |
| <i>PPP1R3F</i>  | BA46   | 5.33E-10   | 0.000722 | 2.98E-08 | increasing     | 0          |
| <i>PPP2R1A</i>  | BA46   | 6.92E-08   | -0.00037 | 0.010104 | other          | 0          |

**Supplementary Table 9. Genes with a significant age effect from either ANOVA or linear regression. Beta is the regression coefficient, Pval is the p-value for the regression coefficient of expression on age (in days). Effect category is increasing if beta is positive and significant, decreasing if beta is negative and significant, and other if the ANOVA were significant rather than the linear regression. Local eQTL is 1 if the gene had a significant local eQTL**

| Gene            | Tissue | Anova.pval | Beta     | Pval     | EffectCategory | Local eQTL |
|-----------------|--------|------------|----------|----------|----------------|------------|
| <i>PPP2R5A</i>  | BA46   | 8.88E-09   | -0.00079 | 1.44E-09 | decreasing     | 0          |
| <i>PPP2R5B</i>  | BA46   | 2.28E-08   | -0.00075 | 8.25E-09 | decreasing     | 0          |
| <i>PPP3CA</i>   | BA46   | 1.90E-07   | 0.000596 | 1.32E-05 | increasing     | 0          |
| <i>PPP3CC</i>   | BA46   | 1.51E-09   | -0.00067 | 5.53E-07 | decreasing     | 0          |
| <i>PPP4R4</i>   | BA46   | 5.93E-08   | -0.00026 | 0.073855 | other          | 0          |
| <i>PPP5C</i>    | BA46   | 1.67E-07   | -0.00045 | 0.001674 | other          | 0          |
| <i>PRCD</i>     | BA46   | 6.35E-08   | 0.000593 | 2.16E-05 | increasing     | 0          |
| <i>PRDM5</i>    | BA46   | 2.38E-09   | 0.000793 | 6.36E-10 | increasing     | 0          |
| <i>PRDM8</i>    | BA46   | 1.63E-05   | -0.00072 | 5.51E-08 | decreasing     | 0          |
| <i>PREPL</i>    | BA46   | 1.52E-07   | 0.000731 | 6.98E-08 | increasing     | 0          |
| <i>PREX1</i>    | BA46   | 3.63E-09   | -0.00079 | 1.33E-09 | decreasing     | 0          |
| <i>PRICKLE2</i> | BA46   | 5.64E-14   | -0.00083 | 1.94E-11 | decreasing     | 0          |
| <i>PRKAG2</i>   | BA46   | 1.91E-07   | 0.000516 | 0.000251 | other          | 0          |
| <i>PRKCB</i>    | BA46   | 2.54E-08   | -0.00076 | 1.14E-08 | decreasing     | 0          |
| <i>PRKG2</i>    | BA46   | 3.51E-11   | -0.00078 | 3.39E-09 | decreasing     | 0          |
| <i>PROK2</i>    | BA46   | 1.80E-07   | -0.00061 | 1.37E-05 | decreasing     | 0          |
| <i>PROM1</i>    | BA46   | 2.17E-08   | -0.00079 | 8.57E-10 | decreasing     | 0          |
| <i>PRPF19</i>   | BA46   | 9.75E-11   | 0.000824 | 2.11E-11 | increasing     | 0          |
| <i>PRR13</i>    | BA46   | 3.07E-07   | 0.000714 | 4.68E-08 | increasing     | 0          |
| <i>PRR5</i>     | BA46   | 6.56E-08   | -0.0008  | 8.65E-10 | decreasing     | 0          |
| <i>PRUNE2</i>   | BA46   | 1.15E-10   | 0.000752 | 1.14E-08 | increasing     | 0          |
| <i>PSMC5</i>    | BA46   | 2.94E-11   | 0.000772 | 1.76E-09 | increasing     | 0          |
| <i>PTBP3</i>    | BA46   | 2.16E-07   | -0.00074 | 3.62E-08 | decreasing     | 0          |
| <i>PTEN</i>     | BA46   | 4.88E-08   | -0.00066 | 1.33E-06 | decreasing     | 0          |
| <i>PTF1A</i>    | BA46   | 1.71E-10   | 0.000715 | 3.33E-08 | increasing     | 0          |
| <i>PTGS1</i>    | BA46   | 4.89E-11   | 0.000736 | 1.70E-08 | increasing     | 0          |
| <i>PTK2B</i>    | BA46   | 1.02E-23   | 0.000924 | 9.36E-16 | increasing     | 0          |
| <i>PTK7</i>     | BA46   | 1.04E-07   | -0.0005  | 0.000378 | other          | 0          |
| <i>PTMS</i>     | BA46   | 1.30E-05   | -0.00071 | 1.60E-07 | decreasing     | 0          |
| <i>PTN</i>      | BA46   | 3.27E-09   | -0.00078 | 1.44E-09 | decreasing     | 0          |
| <i>PTP4A1</i>   | BA46   | 4.93E-10   | -0.00067 | 7.61E-07 | decreasing     | 0          |
| <i>PTPN13</i>   | BA46   | 2.09E-09   | -0.00058 | 2.89E-05 | decreasing     | 1          |
| <i>PTPN14</i>   | BA46   | 3.13E-12   | 0.000797 | 1.97E-10 | increasing     | 0          |
| <i>PTPN5</i>    | BA46   | 4.27E-09   | 0.000738 | 2.89E-08 | increasing     | 0          |
| <i>PTPN9</i>    | BA46   | 5.79E-10   | -0.00066 | 1.18E-06 | decreasing     | 0          |
| <i>PTPRA</i>    | BA46   | 1.63E-07   | -0.00066 | 9.93E-07 | decreasing     | 0          |
| <i>PTPRD</i>    | BA46   | 2.52E-13   | -0.00085 | 6.44E-12 | decreasing     | 0          |
| <i>PTPRG</i>    | BA46   | 3.25E-19   | -0.00092 | 9.76E-15 | decreasing     | 0          |
| <i>PTPRJ</i>    | BA46   | 2.46E-09   | -0.00082 | 2.55E-10 | decreasing     | 0          |
| <i>PTPRR</i>    | BA46   | 2.24E-07   | -0.00073 | 8.78E-09 | decreasing     | 0          |



**Supplementary Table 9. Genes with a significant age effect from either ANOVA or linear regression. Beta is the regression coefficient, Pval is the p-value for the regression coefficient of expression on age (in days). Effect category is increasing if beta is positive and significant, decreasing if beta is negative and significant, and other if the ANOVA were significant rather than the linear regression. Local eQTL is 1 if the gene had a significant local eQTL**

| Gene             | Tissue | Anova.pval | Beta      | Pval     | EffectCategory | Local eQTL |
|------------------|--------|------------|-----------|----------|----------------|------------|
| <i>PURA</i>      | BA46   | 7.07E-09   | 0.000732  | 9.05E-09 | increasing     | 0          |
| <i>PURG</i>      | BA46   | 1.05E-11   | -0.00081  | 1.25E-10 | decreasing     | 0          |
| <i>PVRL2</i>     | BA46   | 7.76E-09   | -0.00077  | 2.30E-09 | decreasing     | 0          |
| <i>PVRL3</i>     | BA46   | 1.38E-12   | -0.00083  | 1.02E-10 | decreasing     | 0          |
| <i>PWWP2B</i>    | BA46   | 2.61E-08   | 0.000599  | 1.85E-05 | increasing     | 0          |
| <i>PXYLP1</i>    | BA46   | 3.99E-09   | 0.000707  | 2.44E-07 | increasing     | 0          |
| <i>PYGM</i>      | BA46   | 8.92E-08   | -0.00047  | 0.000795 | other          | 0          |
| <i>QDPR</i>      | BA46   | 8.55E-14   | 0.000847  | 2.82E-12 | increasing     | 0          |
| <i>R3HCC1</i>    | BA46   | 1.93E-10   | -0.00074  | 1.64E-08 | decreasing     | 0          |
| <i>R3HDM1</i>    | BA46   | 9.65E-11   | -0.00082  | 1.70E-10 | decreasing     | 0          |
| <i>R3HDM2</i>    | BA46   | 6.83E-06   | -0.00074  | 5.27E-08 | decreasing     | 0          |
| <i>R3HDM4</i>    | BA46   | 5.87E-10   | -0.00076  | 8.43E-09 | decreasing     | 0          |
| <i>RAB11FIP4</i> | BA46   | 7.88E-08   | -0.00074  | 3.25E-08 | decreasing     | 0          |
| <i>RAB11FIP5</i> | BA46   | 4.29E-10   | 0.000685  | 3.44E-07 | increasing     | 0          |
| <i>RAB22A</i>    | BA46   | 2.97E-08   | 0.000727  | 2.21E-08 | increasing     | 0          |
| <i>RAE1</i>      | BA46   | 6.77E-11   | 0.000389  | 0.007319 | other          | 0          |
| <i>RAI14</i>     | BA46   | 2.33E-07   | -0.00066  | 1.13E-06 | decreasing     | 1          |
| <i>RALA</i>      | BA46   | 1.02E-12   | -0.0008   | 4.70E-10 | decreasing     | 0          |
| <i>RALBP1</i>    | BA46   | 8.07E-09   | -9.10E-05 | 0.539591 | other          | 0          |
| <i>RALGPS2</i>   | BA46   | 2.83E-07   | -0.00072  | 5.47E-08 | decreasing     | 1          |
| <i>RALYL</i>     | BA46   | 6.93E-08   | 0.000709  | 2.24E-07 | increasing     | 0          |
| <i>RAP1GAP2</i>  | BA46   | 3.74E-15   | -0.00085  | 1.31E-11 | decreasing     | 0          |
| <i>RAPGEF4</i>   | BA46   | 3.27E-11   | -0.00018  | 0.234045 | other          | 0          |
| <i>RASAL2</i>    | BA46   | 3.31E-08   | 8.12E-05  | 0.586891 | other          | 0          |
| <i>RASD1</i>     | BA46   | 1.54E-13   | 0.000783  | 2.71E-10 | increasing     | 0          |
| <i>RASEF</i>     | BA46   | 1.25E-11   | 0.000765  | 3.44E-09 | increasing     | 0          |
| <i>RASGRF2</i>   | BA46   | 8.06E-12   | 0.000576  | 3.63E-05 | increasing     | 1          |
| <i>RASL10B</i>   | BA46   | 1.15E-11   | -0.00082  | 3.42E-10 | decreasing     | 0          |
| <i>RASSF10</i>   | BA46   | 1.79E-07   | -0.00062  | 4.08E-06 | decreasing     | 0          |
| <i>RASSF3</i>    | BA46   | 5.71E-09   | -0.0007   | 1.29E-07 | decreasing     | 0          |
| <i>RASSF5</i>    | BA46   | 1.43E-08   | 0.000315  | 0.032654 | other          | 0          |
| <i>RAVER2</i>    | BA46   | 3.63E-14   | -0.00077  | 7.76E-10 | decreasing     | 0          |
| <i>RBBP5</i>     | BA46   | 3.74E-05   | 0.000722  | 1.05E-07 | increasing     | 0          |
| <i>RBFOX2</i>    | BA46   | 1.11E-13   | -0.00081  | 1.70E-10 | decreasing     | 0          |
| <i>RBPJL</i>     | BA46   | 1.32E-09   | 0.000726  | 3.67E-08 | increasing     | 0          |
| <i>RCAN2</i>     | BA46   | 4.34E-16   | 0.000867  | 3.60E-13 | increasing     | 0          |
| <i>RCAN3</i>     | BA46   | 3.03E-08   | -0.00071  | 4.97E-08 | decreasing     | 0          |
| <i>RDH10</i>     | BA46   | 1.91E-11   | -0.00077  | 2.51E-09 | decreasing     | 0          |
| <i>REEP1</i>     | BA46   | 2.35E-07   | -0.00053  | 0.000159 | other          | 0          |
| <i>RELN</i>      | BA46   | 2.45E-07   | -0.00054  | 0.000139 | other          | 0          |

**Supplementary Table 9. Genes with a significant age effect from either ANOVA or linear regression. Beta is the regression coefficient, Pval is the p-value for the regression coefficient of expression on age (in days). Effect category is increasing if beta is positive and significant, decreasing if beta is negative and significant, and other if the ANOVA were significant rather than the linear regression. Local eQTL is 1 if the gene had a significant local eQTL**

| Gene           | Tissue | Anova.pval | Beta      | Pval     | EffectCategory | Local eQTL |
|----------------|--------|------------|-----------|----------|----------------|------------|
| <i>REPS1</i>   | BA46   | 1.61E-08   | 0.000668  | 6.60E-07 | increasing     | 0          |
| <i>REPS2</i>   | BA46   | 4.89E-13   | 0.000836  | 7.43E-12 | increasing     | 0          |
| <i>RFC2</i>    | BA46   | 1.85E-07   | -0.00073  | 2.08E-08 | decreasing     | 0          |
| <i>RFFL</i>    | BA46   | 1.47E-06   | 0.000716  | 1.41E-07 | increasing     | 0          |
| <i>RFX3</i>    | BA46   | 6.62E-12   | -0.00074  | 1.04E-08 | decreasing     | 0          |
| <i>RGS10</i>   | BA46   | 1.84E-06   | -0.00073  | 6.35E-08 | decreasing     | 0          |
| <i>RGS20</i>   | BA46   | 7.02E-06   | -0.00074  | 4.43E-08 | decreasing     | 0          |
| <i>RGS6</i>    | BA46   | 6.11E-08   | -9.51E-05 | 0.53254  | other          | 0          |
| <i>RGS8</i>    | BA46   | 7.49E-08   | -0.00056  | 4.58E-05 | decreasing     | 1          |
| <i>RHAG</i>    | BA46   | 6.02E-09   | -0.00011  | 0.458954 | other          | 1          |
| <i>RIF1</i>    | BA46   | 1.52E-06   | 0.000756  | 7.20E-09 | increasing     | 0          |
| <i>RIIAD1</i>  | BA46   | 1.91E-07   | -0.0006   | 1.47E-05 | decreasing     | 0          |
| <i>RIMBP2</i>  | BA46   | 2.28E-07   | -0.0006   | 2.10E-05 | decreasing     | 0          |
| <i>RIMKLA</i>  | BA46   | 8.41E-07   | -0.00077  | 5.62E-09 | decreasing     | 0          |
| <i>RIMS1</i>   | BA46   | 2.49E-10   | -0.00042  | 0.003554 | other          | 0          |
| <i>RIMS2</i>   | BA46   | 4.53E-10   | 0.000706  | 1.13E-07 | increasing     | 0          |
| <i>RIMS3</i>   | BA46   | 1.44E-14   | 0.000773  | 2.04E-09 | increasing     | 0          |
| <i>RIMS4</i>   | BA46   | 4.52E-07   | -0.00075  | 8.67E-09 | decreasing     | 0          |
| <i>RLBP1</i>   | BA46   | 4.25E-08   | -9.16E-05 | 0.544261 | other          | 0          |
| <i>RND2</i>    | BA46   | 2.16E-09   | 0.00075   | 5.15E-09 | increasing     | 0          |
| <i>RNF111</i>  | BA46   | 1.38E-10   | 0.000714  | 8.21E-08 | increasing     | 0          |
| <i>RNF112</i>  | BA46   | 5.77E-08   | -0.00078  | 2.71E-09 | decreasing     | 0          |
| <i>RNF152</i>  | BA46   | 6.32E-19   | -0.00088  | 6.59E-14 | decreasing     | 0          |
| <i>RNF165</i>  | BA46   | 6.07E-14   | -0.00087  | 1.75E-12 | decreasing     | 0          |
| <i>RNMT</i>    | BA46   | 8.41E-07   | 0.000718  | 8.81E-08 | increasing     | 0          |
| <i>ROBO1</i>   | BA46   | 5.19E-09   | -0.00051  | 0.000267 | other          | 0          |
| <i>ROBO2</i>   | BA46   | 1.94E-18   | -0.00089  | 3.43E-14 | decreasing     | 0          |
| <i>ROBO3</i>   | BA46   | 7.07E-08   | 4.92E-05  | 0.745444 | other          | 0          |
| <i>RORC</i>    | BA46   | 9.81E-14   | 0.000855  | 3.42E-12 | increasing     | 0          |
| <i>RPE65</i>   | BA46   | 5.87E-09   | -0.00055  | 9.26E-05 | decreasing     | 0          |
| <i>RPH3A</i>   | BA46   | 5.63E-09   | -0.00027  | 0.063841 | other          | 0          |
| <i>RPS6KA5</i> | BA46   | 6.35E-08   | 0.00072   | 1.26E-07 | increasing     | 0          |
| <i>RPS6KC1</i> | BA46   | 1.06E-08   | 0.000737  | 1.63E-08 | increasing     | 0          |
| <i>RRAS2</i>   | BA46   | 8.44E-15   | -0.00086  | 3.46E-12 | decreasing     | 0          |
| <i>RRN3</i>    | BA46   | 1.16E-08   | 0.000519  | 0.000335 | other          | 0          |
| <i>RSAD1</i>   | BA46   | 6.57E-08   | 0.000805  | 7.30E-10 | increasing     | 0          |
| <i>RSBN1</i>   | BA46   | 9.74E-08   | 0.000532  | 0.000199 | other          | 0          |
| <i>RSPH4A</i>  | BA46   | 7.21E-08   | -0.00074  | 8.91E-09 | decreasing     | 0          |
| <i>RTKN2</i>   | BA46   | 1.63E-06   | 0.000719  | 1.29E-07 | increasing     | 0          |
| <i>RUNDC3B</i> | BA46   | 1.98E-07   | 0.000202  | 0.172772 | other          | 0          |

**Supplementary Table 9. Genes with a significant age effect from either ANOVA or linear regression. Beta is the regression coefficient, Pval is the p-value for the regression coefficient of expression on age (in days). Effect category is increasing if beta is positive and significant, decreasing if beta is negative and significant, and other if the ANOVA were significant rather than the linear regression. Local eQTL is 1 if the gene had a significant local eQTL**

| Gene            | Tissue | Anova.pval | Beta     | Pval     | EffectCategory | Local eQTL |
|-----------------|--------|------------|----------|----------|----------------|------------|
| <i>RYR1</i>     | BA46   | 7.50E-09   | 0.000719 | 7.68E-08 | increasing     | 0          |
| <i>RYR3</i>     | BA46   | 1.95E-16   | -0.00087 | 1.07E-13 | decreasing     | 0          |
| <i>S1PR5</i>    | BA46   | 1.57E-13   | 0.000846 | 1.15E-11 | increasing     | 0          |
| <i>SAFB2</i>    | BA46   | 1.84E-07   | 0.000695 | 2.95E-07 | increasing     | 0          |
| <i>SBK1</i>     | BA46   | 4.87E-06   | -0.00075 | 2.75E-08 | decreasing     | 0          |
| <i>SCG2</i>     | BA46   | 6.15E-08   | -0.00064 | 5.28E-06 | decreasing     | 0          |
| <i>SCG3</i>     | BA46   | 1.30E-09   | -0.00034 | 0.015921 | other          | 0          |
| <i>SCGB3A1</i>  | BA46   | 5.84E-09   | 0.000644 | 1.89E-07 | increasing     | 0          |
| <i>SCN1A</i>    | BA46   | 9.26E-11   | 0.000838 | 1.02E-11 | increasing     | 0          |
| <i>SCN1B</i>    | BA46   | 5.28E-20   | 0.000893 | 5.31E-15 | increasing     | 0          |
| <i>SCN3A</i>    | BA46   | 3.94E-11   | -0.00073 | 2.71E-08 | decreasing     | 0          |
| <i>SCN4B</i>    | BA46   | 2.61E-08   | 0.000134 | 0.377394 | other          | 1          |
| <i>SCUBE1</i>   | BA46   | 9.88E-10   | -0.00079 | 1.46E-09 | decreasing     | 0          |
| <i>SDC3</i>     | BA46   | 2.19E-12   | -0.00086 | 2.38E-12 | decreasing     | 0          |
| <i>SDK1</i>     | BA46   | 8.68E-15   | -0.00083 | 1.46E-11 | decreasing     | 0          |
| <i>SDK2</i>     | BA46   | 3.51E-11   | -0.00077 | 1.90E-09 | decreasing     | 0          |
| <i>SEC14L5</i>  | BA46   | 1.24E-15   | 0.000852 | 1.60E-12 | increasing     | 0          |
| <i>SEC24C</i>   | BA46   | 7.70E-08   | 0.000571 | 5.97E-05 | increasing     | 0          |
| <i>SEC31B</i>   | BA46   | 1.54E-10   | 0.00078  | 1.30E-09 | increasing     | 0          |
| <i>SELPLG</i>   | BA46   | 1.73E-09   | -0.00068 | 6.34E-07 | decreasing     | 0          |
| <i>SEMA3B</i>   | BA46   | 7.27E-07   | 0.000725 | 3.95E-08 | increasing     | 0          |
| <i>SEMA3G</i>   | BA46   | 3.34E-09   | -0.00067 | 1.11E-06 | decreasing     | 0          |
| <i>SEMA5B</i>   | BA46   | 3.96E-22   | -0.00091 | 3.11E-14 | decreasing     | 0          |
| <i>SEMA7A</i>   | BA46   | 2.15E-05   | 0.000719 | 1.30E-07 | increasing     | 0          |
| <i>SEPT4</i>    | BA46   | 1.04E-16   | 0.000857 | 3.38E-13 | increasing     | 0          |
| <i>SERBP1</i>   | BA46   | 1.30E-07   | -0.00034 | 0.01968  | other          | 0          |
| <i>SERINC5</i>  | BA46   | 2.72E-09   | -0.00071 | 7.65E-08 | decreasing     | 1          |
| <i>SERPINA1</i> | BA46   | 1.00E-10   | -0.00077 | 5.19E-09 | decreasing     | 0          |
| <i>SESTD1</i>   | BA46   | 3.91E-08   | -0.00047 | 0.000959 | other          | 0          |
| <i>SEZ6</i>     | BA46   | 2.39E-12   | -0.00085 | 7.35E-12 | decreasing     | 0          |
| <i>SFMBT2</i>   | BA46   | 2.44E-20   | -0.0009  | 1.42E-15 | decreasing     | 0          |
| <i>SFXN5</i>    | BA46   | 1.58E-07   | -0.00038 | 0.008158 | other          | 0          |
| <i>SGCZ</i>     | BA46   | 6.39E-12   | -0.00082 | 3.91E-11 | decreasing     | 0          |
| <i>SH2B2</i>    | BA46   | 1.99E-07   | -0.00069 | 1.22E-07 | decreasing     | 0          |
| <i>SH2D5</i>    | BA46   | 1.15E-18   | 0.000893 | 4.21E-14 | increasing     | 0          |
| <i>SH3BGRL2</i> | BA46   | 1.10E-11   | 0.000851 | 1.99E-11 | increasing     | 0          |
| <i>SH3GL2</i>   | BA46   | 2.06E-08   | 0.000761 | 7.54E-09 | increasing     | 0          |
| <i>SH3RF2</i>   | BA46   | 3.17E-12   | 0.000834 | 1.47E-11 | increasing     | 0          |
| <i>SH3RF3</i>   | BA46   | 4.53E-20   | -0.00091 | 7.03E-15 | decreasing     | 0          |
| <i>SHANK2</i>   | BA46   | 1.24E-08   | -0.00081 | 3.97E-10 | decreasing     | 0          |

**Supplementary Table 9. Genes with a significant age effect from either ANOVA or linear regression. Beta is the regression coefficient, Pval is the p-value for the regression coefficient of expression on age (in days). Effect category is increasing if beta is positive and significant, decreasing if beta is negative and significant, and other if the ANOVA were significant rather than the linear regression. Local eQTL is 1 if the gene had a significant local eQTL**

| Gene            | Tissue | Anova.pval | Beta     | Pval     | EffectCategory | Local eQTL |
|-----------------|--------|------------|----------|----------|----------------|------------|
| <i>SHISA9</i>   | BA46   | 5.38E-11   | -0.00085 | 6.01E-12 | decreasing     | 0          |
| <i>SIK1</i>     | BA46   | 1.61E-07   | 4.43E-05 | 0.766944 | other          | 0          |
| <i>SIMC1</i>    | BA46   | 2.52E-10   | -0.00072 | 2.86E-08 | decreasing     | 0          |
| <i>SIPA1L1</i>  | BA46   | 1.59E-07   | 0.000171 | 0.249023 | other          | 0          |
| <i>SIPA1L2</i>  | BA46   | 1.75E-11   | -0.00077 | 7.76E-09 | decreasing     | 0          |
| <i>SIX4</i>     | BA46   | 2.17E-11   | 0.000733 | 1.99E-08 | increasing     | 0          |
| <i>SLA</i>      | BA46   | 3.09E-17   | -0.00085 | 5.70E-13 | decreasing     | 0          |
| <i>SLC16A1</i>  | BA46   | 3.81E-11   | -0.00069 | 4.26E-07 | decreasing     | 0          |
| <i>SLC16A11</i> | BA46   | 1.88E-07   | 0.000665 | 7.59E-07 | increasing     | 0          |
| <i>SLC16A2</i>  | BA46   | 1.00E-07   | -0.00072 | 4.81E-08 | decreasing     | 0          |
| <i>SLC22A23</i> | BA46   | 8.32E-14   | -0.00082 | 2.56E-11 | decreasing     | 0          |
| <i>SLC23A2</i>  | BA46   | 3.72E-10   | -0.00071 | 9.67E-08 | decreasing     | 0          |
| <i>SLC24A2</i>  | BA46   | 4.38E-08   | 0.000623 | 4.23E-06 | increasing     | 0          |
| <i>SLC24A3</i>  | BA46   | 1.25E-10   | -0.00072 | 5.63E-08 | decreasing     | 0          |
| <i>SLC24A4</i>  | BA46   | 3.65E-15   | 0.000817 | 1.57E-11 | increasing     | 0          |
| <i>SLC25A23</i> | BA46   | 2.38E-07   | 4.07E-05 | 0.78541  | other          | 0          |
| <i>SLC25A26</i> | BA46   | 1.28E-07   | 0.00054  | 0.000128 | other          | 1          |
| <i>SLC25A27</i> | BA46   | 2.23E-05   | 0.000711 | 1.57E-07 | increasing     | 0          |
| <i>SLC25A45</i> | BA46   | 4.51E-15   | 0.000793 | 6.06E-10 | increasing     | 0          |
| <i>SLC26A11</i> | BA46   | 1.98E-14   | 0.000888 | 3.92E-13 | increasing     | 0          |
| <i>SLC26A5</i>  | BA46   | 8.05E-06   | 0.000719 | 5.53E-08 | increasing     | 0          |
| <i>SLC27A2</i>  | BA46   | 7.20E-08   | 0.000786 | 2.55E-09 | increasing     | 0          |
| <i>SLC29A4</i>  | BA46   | 1.29E-10   | -0.00082 | 9.91E-11 | decreasing     | 0          |
| <i>SLC2A5</i>   | BA46   | 2.16E-05   | -0.00072 | 1.20E-07 | decreasing     | 0          |
| <i>SLC30A10</i> | BA46   | 4.84E-15   | -0.00086 | 4.46E-12 | decreasing     | 0          |
| <i>SLC30A3</i>  | BA46   | 2.53E-07   | -0.00067 | 6.10E-07 | decreasing     | 0          |
| <i>SLC35C1</i>  | BA46   | 3.56E-11   | -0.00075 | 1.25E-08 | decreasing     | 0          |
| <i>SLC35F1</i>  | BA46   | 1.57E-07   | -0.00049 | 0.000565 | other          | 0          |
| <i>SLC35F3</i>  | BA46   | 4.85E-08   | 0.000559 | 6.74E-05 | increasing     | 0          |
| <i>SLC38A3</i>  | BA46   | 1.42E-05   | -0.00072 | 1.09E-07 | decreasing     | 0          |
| <i>SLC3A1</i>   | BA46   | 2.75E-08   | 0.000715 | 1.52E-07 | increasing     | 0          |
| <i>SLC40A1</i>  | BA46   | 5.99E-08   | -0.00072 | 4.18E-08 | decreasing     | 0          |
| <i>SLC44A5</i>  | BA46   | 7.40E-08   | -0.00063 | 1.96E-06 | decreasing     | 0          |
| <i>SLC4A11</i>  | BA46   | 3.35E-08   | 0.000776 | 1.92E-09 | increasing     | 0          |
| <i>SLC4A3</i>   | BA46   | 1.24E-10   | -0.00083 | 2.65E-11 | decreasing     | 0          |
| <i>SLC6A7</i>   | BA46   | 1.20E-08   | 0.000763 | 8.69E-09 | increasing     | 0          |
| <i>SLC7A14</i>  | BA46   | 7.57E-11   | 0.000855 | 1.36E-11 | increasing     | 1          |
| <i>SLC7A8</i>   | BA46   | 9.71E-08   | 0.000487 | 0.000651 | other          | 0          |
| <i>SLC8A3</i>   | BA46   | 4.94E-08   | -0.00053 | 0.000148 | other          | 0          |
| <i>SLC9A1</i>   | BA46   | 3.84E-08   | 0.000535 | 0.000136 | other          | 0          |

**Supplementary Table 9. Genes with a significant age effect from either ANOVA or linear regression. Beta is the regression coefficient, Pval is the p-value for the regression coefficient of expression on age (in days). Effect category is increasing if beta is positive and significant, decreasing if beta is negative and significant, and other if the ANOVA were significant rather than the linear regression. Local eQTL is 1 if the gene had a significant local eQTL**

| Gene           | Tissue | Anova.pval | Beta     | Pval     | EffectCategory | Local eQTL |
|----------------|--------|------------|----------|----------|----------------|------------|
| <i>SLC9A6</i>  | BA46   | 5.12E-08   | 0.000304 | 0.040661 | other          | 0          |
| <i>SLCO1C1</i> | BA46   | 1.47E-08   | -0.0008  | 1.00E-09 | decreasing     | 0          |
| <i>SLCO4A1</i> | BA46   | 3.28E-11   | 0.00079  | 1.54E-09 | increasing     | 0          |
| <i>SLCO5A1</i> | BA46   | 1.19E-07   | 3.58E-05 | 0.811887 | other          | 0          |
| <i>SLIT1</i>   | BA46   | 1.72E-14   | -0.00086 | 7.31E-13 | decreasing     | 0          |
| <i>SLITRK6</i> | BA46   | 1.80E-07   | -0.00064 | 1.72E-06 | decreasing     | 0          |
| <i>SMAD2</i>   | BA46   | 5.32E-11   | -0.00072 | 8.85E-08 | decreasing     | 0          |
| <i>SMAD5</i>   | BA46   | 1.42E-06   | 0.000737 | 1.59E-08 | increasing     | 0          |
| <i>SMARCA2</i> | BA46   | 1.04E-10   | -0.00076 | 3.71E-09 | decreasing     | 0          |
| <i>SMARCD1</i> | BA46   | 7.12E-09   | -0.00062 | 6.27E-06 | decreasing     | 0          |
| <i>SMCR8</i>   | BA46   | 7.36E-09   | 0.000794 | 1.61E-09 | increasing     | 0          |
| <i>SMOC2</i>   | BA46   | 2.24E-08   | 5.10E-05 | 0.731205 | other          | 0          |
| <i>SMPD3</i>   | BA46   | 7.15E-13   | -0.00083 | 1.93E-11 | decreasing     | 0          |
| <i>SMURF2</i>  | BA46   | 1.93E-12   | -0.00079 | 5.24E-10 | decreasing     | 0          |
| <i>SMYD5</i>   | BA46   | 1.02E-11   | 0.000854 | 8.64E-12 | increasing     | 0          |
| <i>SNAP25</i>  | BA46   | 1.89E-10   | 0.000678 | 3.16E-07 | increasing     | 0          |
| <i>SNCB</i>    | BA46   | 2.71E-09   | 0.000621 | 5.67E-06 | increasing     | 0          |
| <i>SNCG</i>    | BA46   | 3.40E-09   | 0.000641 | 1.95E-06 | increasing     | 0          |
| <i>SNN</i>     | BA46   | 2.47E-09   | 0.000821 | 1.88E-10 | increasing     | 0          |
| <i>SNTB2</i>   | BA46   | 1.86E-07   | 0.000303 | 0.037585 | other          | 0          |
| <i>SNTG1</i>   | BA46   | 1.61E-05   | -0.00071 | 2.44E-07 | decreasing     | 0          |
| <i>SNTG2</i>   | BA46   | 1.13E-11   | 0.000811 | 9.54E-11 | increasing     | 1          |
| <i>SNX21</i>   | BA46   | 9.82E-07   | 0.000724 | 5.32E-08 | increasing     | 0          |
| <i>SNX7</i>    | BA46   | 2.28E-07   | -0.00043 | 0.003162 | other          | 0          |
| <i>SOBP</i>    | BA46   | 2.67E-05   | -0.00072 | 8.05E-08 | decreasing     | 0          |
| <i>SOCS7</i>   | BA46   | 5.21E-10   | -0.00078 | 2.40E-09 | decreasing     | 0          |
| <i>SOHLH1</i>  | BA46   | 1.54E-08   | 0.000411 | 0.004419 | other          | 0          |
| <i>SORBS2</i>  | BA46   | 2.45E-16   | -0.00091 | 1.47E-13 | decreasing     | 0          |
| <i>SORT1</i>   | BA46   | 1.56E-10   | 0.000805 | 1.05E-10 | increasing     | 0          |
| <i>SOWAHB</i>  | BA46   | 8.14E-13   | 0.000774 | 5.36E-10 | increasing     | 0          |
| <i>SOWAHC</i>  | BA46   | 4.70E-10   | -0.00072 | 1.43E-08 | decreasing     | 1          |
| <i>SOX11</i>   | BA46   | 1.56E-21   | -0.0009  | 1.77E-14 | decreasing     | 0          |
| <i>SOX4</i>    | BA46   | 1.57E-16   | -0.00089 | 4.95E-14 | decreasing     | 0          |
| <i>SPATA18</i> | BA46   | 2.09E-07   | 0.000754 | 3.89E-09 | increasing     | 0          |
| <i>SPATA2</i>  | BA46   | 2.23E-06   | 0.0007   | 1.32E-07 | increasing     | 0          |
| <i>SPATA20</i> | BA46   | 1.66E-09   | 0.000733 | 8.73E-09 | increasing     | 0          |
| <i>SPATA2L</i> | BA46   | 3.79E-10   | -0.00079 | 2.02E-10 | decreasing     | 0          |
| <i>SPECC1</i>  | BA46   | 8.72E-10   | 3.95E-05 | 0.790239 | other          | 0          |
| <i>SPEF1</i>   | BA46   | 1.46E-08   | -0.00061 | 8.33E-06 | decreasing     | 0          |
| <i>SPG21</i>   | BA46   | 5.03E-07   | 0.00072  | 6.91E-08 | increasing     | 0          |

**Supplementary Table 9. Genes with a significant age effect from either ANOVA or linear regression. Beta is the regression coefficient, Pval is the p-value for the regression coefficient of expression on age (in days). Effect category is increasing if beta is positive and significant, decreasing if beta is negative and significant, and other if the ANOVA were significant rather than the linear regression. Local eQTL is 1 if the gene had a significant local eQTL**

| Gene              | Tissue | Anova.pval | Beta      | Pval     | EffectCategory | Local eQTL |
|-------------------|--------|------------|-----------|----------|----------------|------------|
| <i>SPHKAP</i>     | BA46   | 1.50E-08   | -0.00071  | 1.67E-07 | decreasing     | 0          |
| <i>SPIN3</i>      | BA46   | 5.24E-06   | 0.000765  | 7.52E-09 | increasing     | 0          |
| <i>SPIN4</i>      | BA46   | 1.11E-08   | -0.00041  | 0.004729 | other          | 0          |
| <i>SPINK2</i>     | BA46   | 3.93E-11   | -0.00078  | 1.76E-09 | decreasing     | 0          |
| <i>SPINK5</i>     | BA46   | 8.70E-06   | -0.00072  | 1.07E-07 | decreasing     | 0          |
| <i>SPINT1</i>     | BA46   | 1.92E-07   | -0.00023  | 0.121418 | other          | 0          |
| <i>SPNS2</i>      | BA46   | 2.32E-07   | 0.000619  | 6.09E-06 | increasing     | 0          |
| <i>SPOCD1</i>     | BA46   | 4.65E-10   | 0.000647  | 1.44E-06 | increasing     | 0          |
| <i>SPOCK2</i>     | BA46   | 5.03E-08   | 0.000749  | 2.41E-08 | increasing     | 0          |
| <i>SPON1</i>      | BA46   | 8.41E-09   | -0.0005   | 0.000318 | other          | 0          |
| <i>SPRN</i>       | BA46   | 1.40E-08   | -0.00077  | 6.09E-10 | decreasing     | 0          |
| <i>SPSB1</i>      | BA46   | 2.04E-09   | 0.000831  | 1.12E-10 | increasing     | 0          |
| <i>SPTB</i>       | BA46   | 6.74E-14   | -0.00087  | 3.14E-12 | decreasing     | 0          |
| <i>SPTBN1</i>     | BA46   | 2.30E-07   | -0.00078  | 1.72E-09 | decreasing     | 0          |
| <i>SPTBN2</i>     | BA46   | 8.14E-10   | -0.00056  | 7.70E-05 | decreasing     | 0          |
| <i>SPTBN5</i>     | BA46   | 2.44E-10   | -0.00055  | 0.000127 | other          | 0          |
| <i>SRD5A1</i>     | BA46   | 2.86E-11   | -0.00077  | 1.13E-09 | decreasing     | 0          |
| <i>SREBF1</i>     | BA46   | 1.15E-09   | 0.000765  | 1.98E-09 | increasing     | 0          |
| <i>SRGAP1</i>     | BA46   | 5.72E-09   | -0.00065  | 1.65E-06 | decreasing     | 0          |
| <i>SRGAP2</i>     | BA46   | 1.90E-08   | -0.00078  | 8.35E-10 | decreasing     | 0          |
| <i>SRGAP3</i>     | BA46   | 3.25E-08   | -0.00075  | 5.51E-09 | decreasing     | 0          |
| <i>SRP68</i>      | BA46   | 7.50E-13   | 0.000776  | 1.65E-09 | increasing     | 0          |
| <i>SRPX2</i>      | BA46   | 1.46E-08   | -0.00071  | 2.28E-07 | decreasing     | 0          |
| <i>SSBP2</i>      | BA46   | 1.83E-07   | -0.00049  | 0.000647 | other          | 0          |
| <i>SSH1</i>       | BA46   | 4.02E-09   | 0.000691  | 1.69E-07 | increasing     | 0          |
| <i>SSH3</i>       | BA46   | 1.02E-11   | 0.00081   | 2.41E-10 | increasing     | 0          |
| <i>SSTR1</i>      | BA46   | 9.64E-12   | -0.00079  | 1.05E-10 | decreasing     | 0          |
| <i>SSTR2</i>      | BA46   | 2.04E-09   | -0.00066  | 7.11E-07 | decreasing     | 0          |
| <i>SSTR3</i>      | BA46   | 5.11E-11   | 0.000762  | 3.44E-09 | increasing     | 0          |
| <i>ST18</i>       | BA46   | 1.78E-14   | 0.000867  | 9.89E-13 | increasing     | 0          |
| <i>ST6GAL2</i>    | BA46   | 9.92E-10   | -0.00075  | 8.08E-09 | decreasing     | 0          |
| <i>ST6GALNAC6</i> | BA46   | 6.12E-08   | -0.00077  | 7.07E-09 | decreasing     | 0          |
| <i>ST8SIA1</i>    | BA46   | 5.30E-12   | 0.000818  | 9.62E-11 | increasing     | 0          |
| <i>ST8SIA2</i>    | BA46   | 6.90E-14   | -0.00085  | 1.51E-12 | decreasing     | 0          |
| <i>ST8SIA4</i>    | BA46   | 8.88E-11   | -0.0008   | 5.13E-10 | decreasing     | 0          |
| <i>ST8SIA5</i>    | BA46   | 3.66E-08   | -2.69E-06 | 0.985726 | other          | 0          |
| <i>STAB1</i>      | BA46   | 2.30E-09   | -0.00077  | 3.30E-09 | decreasing     | 0          |
| <i>STAC2</i>      | BA46   | 5.66E-12   | 0.00084   | 1.52E-11 | increasing     | 0          |
| <i>STAMBPL1</i>   | BA46   | 2.79E-14   | 0.000853  | 5.44E-13 | increasing     | 0          |
| <i>STARD13</i>    | BA46   | 9.24E-07   | 0.000729  | 3.60E-08 | increasing     | 1          |

**Supplementary Table 9. Genes with a significant age effect from either ANOVA or linear regression. Beta is the regression coefficient, Pval is the p-value for the regression coefficient of expression on age (in days). Effect category is increasing if beta is positive and significant, decreasing if beta is negative and significant, and other if the ANOVA were significant rather than the linear regression. Local eQTL is 1 if the gene had a significant local eQTL**

| Gene            | Tissue | Anova.pval | Beta     | Pval     | EffectCategory | Local eQTL |
|-----------------|--------|------------|----------|----------|----------------|------------|
| <i>STARD9</i>   | BA46   | 2.27E-07   | 0.00051  | 0.000269 | other          | 0          |
| <i>STAT4</i>    | BA46   | 9.67E-06   | 0.000696 | 7.82E-08 | increasing     | 0          |
| <i>STAT6</i>    | BA46   | 1.42E-07   | 0.000745 | 1.64E-08 | increasing     | 0          |
| <i>STAU2</i>    | BA46   | 4.04E-09   | 0.000171 | 0.240999 | other          | 0          |
| <i>STEAP2</i>   | BA46   | 2.92E-14   | 0.000851 | 1.87E-12 | increasing     | 0          |
| <i>STEAP3</i>   | BA46   | 3.92E-11   | 0.000784 | 7.36E-10 | increasing     | 0          |
| <i>STK17A</i>   | BA46   | 1.10E-08   | -0.00077 | 5.94E-09 | decreasing     | 1          |
| <i>STMN2</i>    | BA46   | 1.74E-07   | -0.00051 | 0.000284 | other          | 0          |
| <i>STRADB</i>   | BA46   | 5.38E-09   | -0.00074 | 1.76E-08 | decreasing     | 0          |
| <i>STRIP2</i>   | BA46   | 5.96E-06   | -0.00075 | 2.54E-08 | decreasing     | 1          |
| <i>STRN4</i>    | BA46   | 4.42E-11   | -0.00085 | 2.18E-11 | decreasing     | 0          |
| <i>STX1A</i>    | BA46   | 2.20E-07   | -0.00062 | 1.16E-05 | decreasing     | 0          |
| <i>SUN2</i>     | BA46   | 1.20E-09   | 0.000745 | 4.04E-09 | increasing     | 0          |
| <i>SUPT16H</i>  | BA46   | 2.90E-09   | 0.000637 | 4.97E-06 | increasing     | 0          |
| <i>SUPT6H</i>   | BA46   | 1.60E-06   | 0.000706 | 1.66E-07 | increasing     | 0          |
| <i>SUSD4</i>    | BA46   | 9.10E-17   | 0.000872 | 6.54E-14 | increasing     | 0          |
| <i>SUSD5</i>    | BA46   | 2.11E-09   | 0.000665 | 6.17E-07 | increasing     | 0          |
| <i>SV2B</i>     | BA46   | 4.00E-08   | 0.000768 | 7.00E-09 | increasing     | 0          |
| <i>SYN2</i>     | BA46   | 3.40E-08   | 0.000616 | 7.77E-06 | increasing     | 0          |
| <i>SYN3</i>     | BA46   | 5.20E-09   | 0.000704 | 1.71E-07 | increasing     | 0          |
| <i>SYNDIG1</i>  | BA46   | 1.51E-11   | 0.000697 | 1.20E-07 | increasing     | 0          |
| <i>SYNGAP1</i>  | BA46   | 1.46E-05   | -0.00073 | 6.09E-08 | decreasing     | 0          |
| <i>SYNJ2</i>    | BA46   | 2.12E-18   | 0.0009   | 8.96E-15 | increasing     | 0          |
| <i>SYT14</i>    | BA46   | 1.49E-07   | 0.00067  | 8.66E-07 | increasing     | 0          |
| <i>SYT17</i>    | BA46   | 5.68E-12   | -0.00081 | 1.27E-10 | decreasing     | 0          |
| <i>SYT2</i>     | BA46   | 2.65E-13   | 0.000824 | 2.11E-11 | increasing     | 0          |
| <i>SYT6</i>     | BA46   | 1.25E-06   | -0.00069 | 9.74E-08 | decreasing     | 0          |
| <i>SYTL1</i>    | BA46   | 4.98E-16   | 0.000869 | 9.12E-14 | increasing     | 0          |
| <i>TACR1</i>    | BA46   | 5.47E-08   | -0.00044 | 0.002237 | other          | 0          |
| <i>TACR3</i>    | BA46   | 1.76E-09   | 0.000669 | 1.04E-06 | increasing     | 1          |
| <i>TADA2A</i>   | BA46   | 1.45E-07   | -0.0007  | 3.29E-07 | decreasing     | 0          |
| <i>TAF4B</i>    | BA46   | 1.61E-16   | 0.000858 | 2.37E-12 | increasing     | 0          |
| <i>TAGLN2</i>   | BA46   | 1.29E-07   | -0.00075 | 2.78E-08 | decreasing     | 0          |
| <i>TAGLN3</i>   | BA46   | 6.23E-08   | 0.000744 | 1.67E-08 | increasing     | 0          |
| <i>TAL1</i>     | BA46   | 5.93E-08   | -0.00073 | 7.41E-08 | decreasing     | 0          |
| <i>TAP2</i>     | BA46   | 1.51E-06   | 0.000732 | 1.62E-08 | increasing     | 0          |
| <i>TAPBP</i>    | BA46   | 2.51E-08   | 0.000691 | 1.63E-07 | increasing     | 0          |
| <i>TARSL2</i>   | BA46   | 3.85E-16   | 0.000899 | 1.56E-13 | increasing     | 0          |
| <i>TATDN2</i>   | BA46   | 1.11E-10   | -0.00079 | 1.59E-10 | decreasing     | 0          |
| <i>TBC1D22B</i> | BA46   | 7.86E-09   | -0.00073 | 4.47E-08 | decreasing     | 0          |

**Supplementary Table 9. Genes with a significant age effect from either ANOVA or linear regression. Beta is the regression coefficient, Pval is the p-value for the regression coefficient of expression on age (in days). Effect category is increasing if beta is positive and significant, decreasing if beta is negative and significant, and other if the ANOVA were significant rather than the linear regression. Local eQTL is 1 if the gene had a significant local eQTL**

| Gene           | Tissue | Anova.pval | Beta      | Pval     | EffectCategory | Local eQTL |
|----------------|--------|------------|-----------|----------|----------------|------------|
| <i>TBC1D4</i>  | BA46   | 3.28E-08   | 0.000609  | 9.02E-06 | increasing     | 0          |
| <i>TBCEL</i>   | BA46   | 1.55E-05   | -0.00075  | 2.36E-08 | decreasing     | 0          |
| <i>TBR1</i>    | BA46   | 7.67E-07   | 0.000745  | 3.16E-08 | increasing     | 0          |
| <i>TBX3</i>    | BA46   | 3.29E-08   | -0.00082  | 3.07E-10 | decreasing     | 0          |
| <i>TCEAL6</i>  | BA46   | 4.70E-07   | 0.000707  | 6.97E-08 | increasing     | 0          |
| <i>TCF12</i>   | BA46   | 1.03E-07   | -0.00018  | 0.225039 | other          | 0          |
| <i>TCN2</i>    | BA46   | 9.99E-07   | -0.00071  | 1.04E-07 | decreasing     | 0          |
| <i>TCTN1</i>   | BA46   | 2.52E-08   | -0.00059  | 1.20E-05 | decreasing     | 0          |
| <i>TECTA</i>   | BA46   | 1.15E-11   | -0.00065  | 2.98E-06 | decreasing     | 0          |
| <i>TENM3</i>   | BA46   | 2.66E-12   | -0.0008   | 1.78E-10 | decreasing     | 0          |
| <i>TENM4</i>   | BA46   | 2.48E-05   | -0.00069  | 1.79E-07 | decreasing     | 0          |
| <i>TERF2IP</i> | BA46   | 1.42E-08   | 0.000748  | 2.51E-08 | increasing     | 0          |
| <i>TESC</i>    | BA46   | 2.95E-08   | 0.000306  | 0.035758 | other          | 0          |
| <i>TESK2</i>   | BA46   | 2.40E-07   | 0.000169  | 0.258315 | other          | 0          |
| <i>TESPA1</i>  | BA46   | 8.89E-09   | 7.37E-05  | 0.621982 | other          | 0          |
| <i>TET1</i>    | BA46   | 4.39E-13   | -0.00082  | 8.64E-11 | decreasing     | 0          |
| <i>TET2</i>    | BA46   | 6.67E-12   | -0.0008   | 4.42E-10 | decreasing     | 0          |
| <i>TET3</i>    | BA46   | 4.61E-17   | -0.00088  | 1.15E-13 | decreasing     | 0          |
| <i>TEX29</i>   | BA46   | 3.79E-08   | 0.000362  | 0.01457  | other          | 0          |
| <i>TEX37</i>   | BA46   | 3.41E-10   | -0.00075  | 3.24E-09 | decreasing     | 0          |
| <i>TF</i>      | BA46   | 5.40E-08   | 0.000663  | 6.76E-07 | increasing     | 0          |
| <i>TFAP4</i>   | BA46   | 7.71E-07   | 0.000767  | 5.44E-09 | increasing     | 0          |
| <i>TFDP2</i>   | BA46   | 9.12E-11   | 0.000666  | 8.63E-07 | increasing     | 0          |
| <i>TFRC</i>    | BA46   | 1.78E-07   | -0.00055  | 9.64E-05 | decreasing     | 0          |
| <i>TGM3</i>    | BA46   | 2.14E-06   | -0.00071  | 3.51E-08 | decreasing     | 1          |
| <i>TGM6</i>    | BA46   | 1.53E-09   | -9.34E-05 | 0.542292 | other          | 0          |
| <i>THBS4</i>   | BA46   | 5.91E-16   | 0.000778  | 2.82E-09 | increasing     | 0          |
| <i>THRB</i>    | BA46   | 1.27E-08   | 0.000683  | 4.21E-07 | increasing     | 0          |
| <i>THUMPD1</i> | BA46   | 8.07E-09   | 0.000473  | 0.001106 | other          | 0          |
| <i>THYN1</i>   | BA46   | 1.34E-06   | 0.000766  | 7.96E-09 | increasing     | 1          |
| <i>TICRR</i>   | BA46   | 2.56E-07   | -0.00058  | 2.08E-05 | decreasing     | 0          |
| <i>TIMD4</i>   | BA46   | 4.02E-08   | -0.00064  | 1.87E-06 | decreasing     | 0          |
| <i>TIMP2</i>   | BA46   | 6.43E-11   | -0.00074  | 8.12E-09 | decreasing     | 0          |
| <i>TLE2</i>    | BA46   | 3.38E-16   | 0.000871  | 4.77E-13 | increasing     | 0          |
| <i>TLE3</i>    | BA46   | 2.50E-12   | -0.00084  | 5.50E-12 | decreasing     | 0          |
| <i>TLL1</i>    | BA46   | 1.92E-09   | -0.00044  | 0.002124 | other          | 0          |
| <i>TLR6</i>    | BA46   | 9.24E-06   | -0.00072  | 1.25E-07 | decreasing     | 0          |
| <i>TLR7</i>    | BA46   | 1.09E-06   | -0.00074  | 3.39E-08 | decreasing     | 0          |
| <i>TM9SF2</i>  | BA46   | 1.29E-07   | -0.00052  | 0.00034  | other          | 0          |
| <i>TMCC2</i>   | BA46   | 5.89E-12   | 0.000823  | 5.00E-11 | increasing     | 0          |



**Supplementary Table 9. Genes with a significant age effect from either ANOVA or linear regression. Beta is the regression coefficient, Pval is the p-value for the regression coefficient of expression on age (in days). Effect category is increasing if beta is positive and significant, decreasing if beta is negative and significant, and other if the ANOVA were significant rather than the linear regression. Local eQTL is 1 if the gene had a significant local eQTL**

| Gene            | Tissue | Anova.pval  | Beta      | Pval     | EffectCategory | Local eQTL |
|-----------------|--------|-------------|-----------|----------|----------------|------------|
| <i>TMED10</i>   | BA46   | 9.35E-10    | -8.48E-05 | 0.575099 | other          | 0          |
| <i>TMEM125</i>  | BA46   | 2.17E-10    | 0.000763  | 3.12E-09 | increasing     | 0          |
| <i>TMEM130</i>  | BA46   | 3.06E-10    | 0.000618  | 5.25E-06 | increasing     | 0          |
| <i>TMEM132B</i> | BA46   | 2.96E-14    | -0.00082  | 2.10E-11 | decreasing     | 0          |
| <i>TMEM132D</i> | BA46   | 2.19E-10    | -0.00065  | 2.98E-06 | decreasing     | 0          |
| <i>TMEM144</i>  | BA46   | 1.64E-09    | 0.000777  | 2.67E-09 | increasing     | 0          |
| <i>TMEM151B</i> | BA46   | 4.77E-09    | -0.00081  | 4.77E-10 | decreasing     | 0          |
| <i>TMEM163</i>  | BA46   | 3.08E-14    | -0.00079  | 4.26E-10 | decreasing     | 0          |
| <i>TMEM164</i>  | BA46   | 2.97E-07    | -0.00075  | 1.82E-08 | decreasing     | 0          |
| <i>TMEM169</i>  | BA46   | 9.10E-09    | -0.00068  | 3.43E-07 | decreasing     | 0          |
| <i>TMEM178A</i> | BA46   | 7.09E-08    | 0.000107  | 0.480287 | other          | 0          |
| <i>TMEM178B</i> | BA46   | 1.98E-09    | -0.00065  | 1.30E-06 | decreasing     | 0          |
| <i>TMEM192</i>  | BA46   | 2.38E-09    | 0.000698  | 1.10E-07 | increasing     | 0          |
| <i>TMEM200B</i> | BA46   | 1.45E-06    | 0.000715  | 1.03E-07 | increasing     | 0          |
| <i>TMEM200C</i> | BA46   | 4.27E-08    | -0.00078  | 1.21E-09 | decreasing     | 0          |
| <i>TMEM233</i>  | BA46   | 7.41E-06    | 0.000701  | 2.48E-07 | increasing     | 0          |
| <i>TMEM235</i>  | BA46   | 2.03E-09    | 0.000746  | 2.85E-08 | increasing     | 0          |
| <i>TMEM25</i>   | BA46   | 2.05E-12    | 0.000781  | 2.15E-09 | increasing     | 0          |
| <i>TMEM26</i>   | BA46   | 0.000114949 | 0.000706  | 2.50E-07 | increasing     | 0          |
| <i>TMEM35</i>   | BA46   | 1.51E-10    | 0.000174  | 0.243402 | other          | 0          |
| <i>TMEM38A</i>  | BA46   | 9.59E-10    | -0.00068  | 2.94E-07 | decreasing     | 0          |
| <i>TMEM74</i>   | BA46   | 7.76E-12    | -0.00079  | 1.04E-09 | decreasing     | 0          |
| <i>TMEM86B</i>  | BA46   | 1.28E-07    | 0.000633  | 6.03E-06 | increasing     | 0          |
| <i>TMEM88B</i>  | BA46   | 5.30E-09    | 0.000781  | 2.25E-09 | increasing     | 0          |
| <i>TMEM8B</i>   | BA46   | 2.30E-07    | -0.0006   | 2.09E-05 | decreasing     | 0          |
| <i>TMEM91</i>   | BA46   | 1.30E-06    | 0.000737  | 5.03E-08 | increasing     | 0          |
| <i>TMOD3</i>    | BA46   | 1.14E-07    | -0.00063  | 3.24E-06 | decreasing     | 0          |
| <i>TMPRSS13</i> | BA46   | 1.81E-09    | -0.00073  | 4.25E-08 | decreasing     | 0          |
| <i>TMTC2</i>    | BA46   | 1.32E-07    | 0.000687  | 2.55E-07 | increasing     | 0          |
| <i>TMX4</i>     | BA46   | 9.34E-11    | 0.000724  | 5.76E-08 | increasing     | 0          |
| <i>TNC</i>      | BA46   | 1.33E-11    | -0.00078  | 6.24E-10 | decreasing     | 0          |
| <i>TNFRSF14</i> | BA46   | 2.92E-06    | 0.000707  | 1.25E-07 | increasing     | 0          |
| <i>TNFRSF18</i> | BA46   | 2.07E-05    | 0.000717  | 1.43E-07 | increasing     | 0          |
| <i>TNFSF9</i>   | BA46   | 1.18E-10    | 0.000744  | 1.68E-08 | increasing     | 0          |
| <i>TNKS2</i>    | BA46   | 2.15E-11    | -0.00075  | 6.53E-09 | decreasing     | 0          |
| <i>TNNC2</i>    | BA46   | 5.27E-11    | 0.000802  | 2.52E-10 | increasing     | 0          |
| <i>TNNT2</i>    | BA46   | 4.40E-09    | 0.000728  | 2.04E-08 | increasing     | 1          |
| <i>TNRC6A</i>   | BA46   | 1.94E-06    | 0.000749  | 2.63E-08 | increasing     | 0          |
| <i>TOLLIP</i>   | BA46   | 6.67E-10    | 0.00033   | 0.023998 | other          | 0          |
| <i>TOMM34</i>   | BA46   | 3.44E-12    | 0.000846  | 7.12E-12 | increasing     | 0          |

**Supplementary Table 9. Genes with a significant age effect from either ANOVA or linear regression. Beta is the regression coefficient, Pval is the p-value for the regression coefficient of expression on age (in days). Effect category is increasing if beta is positive and significant, decreasing if beta is negative and significant, and other if the ANOVA were significant rather than the linear regression. Local eQTL is 1 if the gene had a significant local eQTL**

| Gene            | Tissue | Anova.pval | Beta     | Pval     | EffectCategory | Local eQTL |
|-----------------|--------|------------|----------|----------|----------------|------------|
| <i>TOR1AIP1</i> | BA46   | 3.07E-09   | 0.000734 | 1.39E-08 | increasing     | 0          |
| <i>TP53INP2</i> | BA46   | 2.53E-07   | -0.00076 | 9.51E-09 | decreasing     | 0          |
| <i>TPD52</i>    | BA46   | 1.09E-10   | 0.000753 | 4.32E-09 | increasing     | 0          |
| <i>TPD52L1</i>  | BA46   | 3.82E-14   | 0.00079  | 6.44E-10 | increasing     | 0          |
| <i>TPRG1L</i>   | BA46   | 8.89E-12   | 0.000825 | 9.11E-11 | increasing     | 0          |
| <i>TRAF3</i>    | BA46   | 3.30E-11   | -0.00071 | 1.66E-07 | decreasing     | 0          |
| <i>TREM2</i>    | BA46   | 5.38E-08   | -0.00078 | 2.72E-09 | decreasing     | 0          |
| <i>TRHDE</i>    | BA46   | 4.46E-08   | -0.00077 | 6.69E-09 | decreasing     | 0          |
| <i>TRIB1</i>    | BA46   | 5.22E-07   | -0.00075 | 1.52E-08 | decreasing     | 0          |
| <i>TRIB2</i>    | BA46   | 1.04E-13   | -0.00087 | 2.08E-12 | decreasing     | 0          |
| <i>TRIM46</i>   | BA46   | 1.61E-08   | -0.00073 | 1.21E-08 | decreasing     | 0          |
| <i>TRIM66</i>   | BA46   | 7.44E-11   | 0.000758 | 8.77E-09 | increasing     | 0          |
| <i>TRIM9</i>    | BA46   | 3.82E-11   | -0.00085 | 3.25E-11 | decreasing     | 0          |
| <i>TRIO</i>     | BA46   | 9.68E-16   | -0.00088 | 1.49E-13 | decreasing     | 0          |
| <i>TRPC3</i>    | BA46   | 6.89E-08   | -0.00073 | 4.59E-08 | decreasing     | 0          |
| <i>TRPV2</i>    | BA46   | 4.45E-09   | 0.000682 | 3.29E-07 | increasing     | 0          |
| <i>TSHZ2</i>    | BA46   | 1.78E-08   | 0.000661 | 1.09E-06 | increasing     | 0          |
| <i>TSPAN14</i>  | BA46   | 4.61E-16   | -0.00088 | 2.38E-13 | decreasing     | 0          |
| <i>TSPAN15</i>  | BA46   | 2.48E-07   | 0.000377 | 0.008923 | other          | 0          |
| <i>TSPAN2</i>   | BA46   | 2.39E-07   | -0.00043 | 0.002606 | other          | 0          |
| <i>TSPYL2</i>   | BA46   | 3.59E-18   | 0.000875 | 1.54E-13 | increasing     | 0          |
| <i>TTBK2</i>    | BA46   | 5.77E-13   | 0.000822 | 2.57E-11 | increasing     | 0          |
| <i>TTC1</i>     | BA46   | 1.63E-10   | 0.000668 | 8.51E-07 | increasing     | 0          |
| <i>TTC22</i>    | BA46   | 1.18E-05   | 0.00072  | 1.23E-07 | increasing     | 0          |
| <i>TTC38</i>    | BA46   | 3.00E-08   | -0.00067 | 6.97E-07 | decreasing     | 0          |
| <i>TTC40</i>    | BA46   | 4.24E-10   | -0.00025 | 0.092192 | other          | 0          |
| <i>TTC9</i>     | BA46   | 6.37E-08   | -0.00054 | 9.42E-05 | decreasing     | 0          |
| <i>TTC9B</i>    | BA46   | 4.57E-07   | -0.00074 | 2.33E-08 | decreasing     | 1          |
| <i>TTL</i>      | BA46   | 2.11E-09   | -0.00079 | 2.02E-09 | decreasing     | 0          |
| <i>TUBA1A</i>   | BA46   | 4.99E-09   | -0.00055 | 7.66E-05 | decreasing     | 0          |
| <i>TUBB</i>     | BA46   | 1.31E-07   | -0.00046 | 0.001245 | other          | 0          |
| <i>TUFT1</i>    | BA46   | 1.63E-07   | 0.000688 | 3.55E-07 | increasing     | 0          |
| <i>TXLNG</i>    | BA46   | 5.03E-08   | 0.000689 | 2.32E-07 | increasing     | 0          |
| <i>UBP1</i>     | BA46   | 1.97E-10   | 0.000583 | 2.56E-05 | increasing     | 0          |
| <i>UBTD2</i>    | BA46   | 2.31E-09   | -0.0007  | 1.38E-07 | decreasing     | 0          |
| <i>UBXN2B</i>   | BA46   | 1.55E-11   | -0.00076 | 6.38E-09 | decreasing     | 0          |
| <i>UCK2</i>     | BA46   | 2.97E-14   | -0.00083 | 9.17E-12 | decreasing     | 0          |
| <i>UGT3A1</i>   | BA46   | 1.87E-06   | 0.000696 | 7.36E-09 | increasing     | 0          |
| <i>UNC13C</i>   | BA46   | 5.46E-11   | -0.00086 | 9.42E-12 | decreasing     | 1          |
| <i>UNC45B</i>   | BA46   | 1.31E-06   | 0.000737 | 2.08E-08 | increasing     | 0          |

**Supplementary Table 9. Genes with a significant age effect from either ANOVA or linear regression. Beta is the regression coefficient, Pval is the p-value for the regression coefficient of expression on age (in days). Effect category is increasing if beta is positive and significant, decreasing if beta is negative and significant, and other if the ANOVA were significant rather than the linear regression. Local eQTL is 1 if the gene had a significant local eQTL**

| Gene           | Tissue | Anova.pval | Beta      | Pval     | EffectCategory | Local eQTL |
|----------------|--------|------------|-----------|----------|----------------|------------|
| <i>UNC79</i>   | BA46   | 5.64E-08   | -8.78E-05 | 0.559878 | other          | 0          |
| <i>URM1</i>    | BA46   | 3.52E-08   | -0.00075  | 1.48E-08 | decreasing     | 0          |
| <i>USH1C</i>   | BA46   | 3.61E-11   | 0.000814  | 1.58E-10 | increasing     | 0          |
| <i>USP11</i>   | BA46   | 2.10E-08   | 0.000765  | 7.48E-09 | increasing     | 0          |
| <i>USP12</i>   | BA46   | 8.56E-13   | -0.00086  | 8.99E-12 | decreasing     | 0          |
| <i>USP28</i>   | BA46   | 1.19E-07   | 0.000623  | 8.46E-06 | increasing     | 0          |
| <i>USP45</i>   | BA46   | 4.23E-08   | 0.000575  | 2.23E-05 | increasing     | 0          |
| <i>USP46</i>   | BA46   | 5.55E-09   | -0.0008   | 7.81E-10 | decreasing     | 0          |
| <i>USP54</i>   | BA46   | 7.53E-07   | 0.000698  | 1.13E-07 | increasing     | 0          |
| <i>USP6NL</i>  | BA46   | 1.16E-08   | -0.00055  | 6.46E-05 | decreasing     | 0          |
| <i>UTRN</i>    | BA46   | 2.94E-08   | -0.00072  | 9.47E-08 | decreasing     | 0          |
| <i>VAMP1</i>   | BA46   | 1.77E-12   | 0.000811  | 2.79E-11 | increasing     | 1          |
| <i>VASH1</i>   | BA46   | 6.16E-06   | -0.00072  | 3.91E-08 | decreasing     | 0          |
| <i>VAV2</i>    | BA46   | 2.35E-09   | -0.00081  | 8.16E-11 | decreasing     | 0          |
| <i>VEPH1</i>   | BA46   | 1.05E-12   | -0.00077  | 1.81E-09 | decreasing     | 0          |
| <i>VHL</i>     | BA46   | 2.86E-09   | -0.00073  | 2.27E-08 | decreasing     | 1          |
| <i>VLDLR</i>   | BA46   | 1.52E-09   | -0.00071  | 1.64E-07 | decreasing     | 0          |
| <i>VOPP1</i>   | BA46   | 1.20E-14   | -0.00085  | 6.09E-12 | decreasing     | 0          |
| <i>VPS13A</i>  | BA46   | 9.03E-08   | 0.000574  | 3.53E-05 | increasing     | 0          |
| <i>VPS37B</i>  | BA46   | 1.60E-05   | -0.00073  | 5.36E-08 | decreasing     | 0          |
| <i>WAC</i>     | BA46   | 2.20E-09   | -6.38E-05 | 0.667542 | other          | 0          |
| <i>WASL</i>    | BA46   | 4.71E-10   | 0.000691  | 1.03E-07 | increasing     | 0          |
| <i>WBP2</i>    | BA46   | 3.62E-11   | 0.000747  | 6.24E-09 | increasing     | 0          |
| <i>WBP4</i>    | BA46   | 6.64E-06   | 0.000691  | 1.65E-07 | increasing     | 0          |
| <i>WDR1</i>    | BA46   | 2.05E-12   | -0.00078  | 1.28E-09 | decreasing     | 0          |
| <i>WDR6</i>    | BA46   | 1.43E-07   | 0.000229  | 0.118871 | other          | 0          |
| <i>WDTC1</i>   | BA46   | 2.92E-09   | 0.000668  | 6.62E-07 | increasing     | 0          |
| <i>WEE1</i>    | BA46   | 5.44E-10   | -0.00058  | 4.20E-05 | decreasing     | 0          |
| <i>WFIKKN1</i> | BA46   | 2.25E-08   | -0.00016  | 0.284026 | other          | 0          |
| <i>WFS1</i>    | BA46   | 2.88E-11   | 0.000821  | 5.77E-11 | increasing     | 0          |
| <i>WIPF3</i>   | BA46   | 2.75E-07   | 0.000785  | 1.92E-09 | increasing     | 0          |
| <i>WLS</i>     | BA46   | 2.10E-11   | -1.00E-05 | 0.946954 | other          | 0          |
| <i>WNT2</i>    | BA46   | 1.23E-09   | 0.000655  | 6.66E-07 | increasing     | 0          |
| <i>WSB2</i>    | BA46   | 1.75E-13   | -0.00086  | 3.04E-12 | decreasing     | 0          |
| <i>WWC1</i>    | BA46   | 8.95E-19   | -0.00089  | 3.47E-14 | decreasing     | 0          |
| <i>WWC2</i>    | BA46   | 1.71E-09   | -0.00078  | 1.29E-09 | decreasing     | 0          |
| <i>XKR4</i>    | BA46   | 6.63E-16   | -0.00086  | 4.89E-13 | decreasing     | 0          |
| <i>XPR1</i>    | BA46   | 4.73E-11   | -0.00075  | 7.14E-09 | decreasing     | 0          |
| <i>XRCC5</i>   | BA46   | 3.74E-08   | 0.000176  | 0.236581 | other          | 0          |
| <i>XRN2</i>    | BA46   | 1.04E-08   | -0.00064  | 3.17E-06 | decreasing     | 0          |

**Supplementary Table 9. Genes with a significant age effect from either ANOVA or linear regression. Beta is the regression coefficient, Pval is the p-value for the regression coefficient of expression on age (in days). Effect category is increasing if beta is positive and significant, decreasing if beta is negative and significant, and other if the ANOVA were significant rather than the linear regression. Local eQTL is 1 if the gene had a significant local eQTL**

| Gene           | Tissue | Anova.pval | Beta      | Pval     | EffectCategory | Local eQTL |
|----------------|--------|------------|-----------|----------|----------------|------------|
| <i>XYLT1</i>   | BA46   | 7.63E-10   | -0.0008   | 1.65E-10 | decreasing     | 0          |
| <i>YBX1</i>    | BA46   | 1.18E-15   | -0.00087  | 3.40E-13 | decreasing     | 0          |
| <i>YES1</i>    | BA46   | 8.85E-09   | -0.00073  | 3.20E-08 | decreasing     | 0          |
| <i>YPEL1</i>   | BA46   | 9.25E-16   | -0.00087  | 1.84E-13 | decreasing     | 0          |
| <i>YPEL4</i>   | BA46   | 2.00E-08   | 0.000775  | 1.38E-09 | increasing     | 0          |
| <i>YWHAB</i>   | BA46   | 1.96E-07   | 0.000159  | 0.289663 | other          | 0          |
| <i>ZBED1</i>   | BA46   | 4.05E-05   | 0.000726  | 7.40E-08 | increasing     | 0          |
| <i>ZBTB10</i>  | BA46   | 1.08E-11   | -0.00073  | 4.05E-08 | decreasing     | 0          |
| <i>ZBTB16</i>  | BA46   | 4.39E-12   | 0.000827  | 1.67E-11 | increasing     | 0          |
| <i>ZBTB18</i>  | BA46   | 5.58E-09   | -0.00069  | 1.41E-07 | decreasing     | 0          |
| <i>ZBTB7C</i>  | BA46   | 1.45E-08   | -1.69E-05 | 0.9093   | other          | 0          |
| <i>ZBTB8A</i>  | BA46   | 2.65E-08   | -0.00059  | 1.40E-05 | decreasing     | 0          |
| <i>ZC4H2</i>   | BA46   | 2.20E-08   | -0.00067  | 5.81E-07 | decreasing     | 0          |
| <i>ZDHHC14</i> | BA46   | 3.08E-13   | -0.00088  | 1.42E-12 | decreasing     | 0          |
| <i>ZDHHC2</i>  | BA46   | 2.92E-08   | -0.00033  | 0.02128  | other          | 0          |
| <i>ZEB1</i>    | BA46   | 1.38E-07   | 7.00E-05  | 0.637483 | other          | 0          |
| <i>ZFAND6</i>  | BA46   | 4.32E-07   | -0.00071  | 1.46E-07 | decreasing     | 0          |
| <i>ZFYVE20</i> | BA46   | 1.01E-10   | 0.000795  | 3.26E-10 | increasing     | 0          |
| <i>ZMYND11</i> | BA46   | 2.64E-09   | -0.0007   | 2.72E-07 | decreasing     | 0          |
| <i>ZNF106</i>  | BA46   | 8.60E-08   | 0.000188  | 0.201732 | other          | 0          |
| <i>ZNF229</i>  | BA46   | 4.98E-16   | -0.00086  | 1.75E-13 | decreasing     | 0          |
| <i>ZNF248</i>  | BA46   | 6.13E-08   | 0.000782  | 2.51E-09 | increasing     | 0          |
| <i>ZNF282</i>  | BA46   | 1.99E-07   | -9.25E-05 | 0.532992 | other          | 0          |
| <i>ZNF300</i>  | BA46   | 3.23E-14   | -0.0008   | 6.98E-11 | decreasing     | 0          |
| <i>ZNF331</i>  | BA46   | 4.54E-07   | 0.000782  | 2.94E-09 | increasing     | 0          |
| <i>ZNF346</i>  | BA46   | 5.75E-11   | -0.0008   | 7.45E-11 | decreasing     | 0          |
| <i>ZNF395</i>  | BA46   | 1.58E-07   | 0.000764  | 1.08E-09 | increasing     | 0          |
| <i>ZNF404</i>  | BA46   | 1.93E-07   | -0.00071  | 1.15E-07 | decreasing     | 0          |
| <i>ZNF436</i>  | BA46   | 4.33E-11   | -0.00078  | 2.20E-09 | decreasing     | 0          |
| <i>ZNF462</i>  | BA46   | 2.78E-06   | -0.00074  | 2.25E-08 | decreasing     | 0          |
| <i>ZNF469</i>  | BA46   | 4.32E-08   | 0.00024   | 0.101555 | other          | 1          |
| <i>ZNF483</i>  | BA46   | 1.16E-18   | 0.000891  | 7.22E-15 | increasing     | 0          |
| <i>ZNF528</i>  | BA46   | 1.11E-08   | -0.00072  | 1.49E-08 | decreasing     | 0          |
| <i>ZNF540</i>  | BA46   | 3.06E-09   | 0.00078   | 1.01E-09 | increasing     | 0          |
| <i>ZNF557</i>  | BA46   | 8.16E-05   | 0.000706  | 2.50E-07 | increasing     | 0          |
| <i>ZNF641</i>  | BA46   | 4.16E-10   | -0.00072  | 4.48E-08 | decreasing     | 1          |
| <i>ZNF704</i>  | BA46   | 6.20E-09   | -0.00076  | 3.82E-09 | decreasing     | 0          |
| <i>ZNF711</i>  | BA46   | 5.40E-08   | -0.0003   | 0.046192 | other          | 0          |
| <i>ZNF727P</i> | BA46   | 2.37E-10   | -0.00074  | 5.70E-09 | decreasing     | 0          |
| <i>ABCA3</i>   | Blood  | 8.08E-10   | 0.000624  | 9.72E-06 | increasing     | 0          |

**Supplementary Table 9. Genes with a significant age effect from either ANOVA or linear regression. Beta is the regression coefficient, Pval is the p-value for the regression coefficient of expression on age (in days). Effect category is increasing if beta is positive and significant, decreasing if beta is negative and significant, and other if the ANOVA were significant rather than the linear regression. Local eQTL is 1 if the gene had a significant local eQTL**

| Gene              | Tissue | Anova.pval | Beta      | Pval     | EffectCategory | Local eQTL |
|-------------------|--------|------------|-----------|----------|----------------|------------|
| <i>ABCC3</i>      | Blood  | 1.40E-07   | 0.00032   | 0.033084 | other          | 0          |
| <i>ACVR1C</i>     | Blood  | 4.43E-08   | 0.000576  | 5.50E-05 | increasing     | 0          |
| <i>ADAMTS13</i>   | Blood  | 9.57E-08   | 0.000227  | 0.135995 | other          | 0          |
| <i>AFMID</i>      | Blood  | 1.57E-07   | 0.000525  | 0.000281 | other          | 0          |
| <i>AIFM3</i>      | Blood  | 7.44E-08   | 0.000341  | 0.022849 | other          | 1          |
| <i>AKAP12</i>     | Blood  | 9.11E-09   | -0.00048  | 0.000911 | other          | 0          |
| <i>ALDH3B1</i>    | Blood  | 1.54E-09   | 0.00016   | 0.296119 | other          | 0          |
| <i>ANGPTL1</i>    | Blood  | 1.58E-08   | -0.00054  | 0.000213 | other          | 0          |
| <i>AR</i>         | Blood  | 2.77E-07   | 0.000732  | 7.26E-08 | increasing     | 0          |
| <i>ASB13</i>      | Blood  | 1.36E-07   | 0.000196  | 0.196867 | other          | 0          |
| <i>BCL11A</i>     | Blood  | 3.65E-08   | -0.00061  | 1.61E-05 | decreasing     | 0          |
| <i>BEND5</i>      | Blood  | 2.36E-08   | -0.00054  | 0.000136 | other          | 0          |
| <i>BLNK</i>       | Blood  | 3.48E-11   | -0.00064  | 3.95E-06 | decreasing     | 0          |
| <i>BRCA2</i>      | Blood  | 2.32E-07   | -0.00055  | 0.000115 | other          | 0          |
| <i>C1H11orf82</i> | Blood  | 1.17E-07   | -0.00042  | 0.004274 | other          | 0          |
| <i>CASC5</i>      | Blood  | 1.09E-07   | -0.00056  | 7.56E-05 | decreasing     | 0          |
| <i>CCDC180</i>    | Blood  | 1.28E-07   | 0.000625  | 9.78E-06 | increasing     | 0          |
| <i>CD38</i>       | Blood  | 8.43E-09   | -0.00059  | 2.48E-05 | decreasing     | 0          |
| <i>CD72</i>       | Blood  | 4.27E-08   | -0.00051  | 0.000303 | other          | 0          |
| <i>CD79A</i>      | Blood  | 2.08E-07   | -0.00041  | 0.00447  | other          | 0          |
| <i>CDC42BPB</i>   | Blood  | 1.68E-07   | 0.000185  | 0.226215 | other          | 0          |
| <i>CDC42BPG</i>   | Blood  | 1.90E-09   | 0.000495  | 0.000705 | other          | 0          |
| <i>CDHR2</i>      | Blood  | 2.46E-07   | 0.000458  | 0.001878 | other          | 0          |
| <i>CEP131</i>     | Blood  | 7.73E-08   | 0.000468  | 0.001432 | other          | 0          |
| <i>CHI3L2</i>     | Blood  | 5.72E-08   | -0.00078  | 4.59E-09 | decreasing     | 0          |
| <i>CLEC17A</i>    | Blood  | 1.32E-07   | -0.0004   | 0.006203 | other          | 0          |
| <i>CLSTN3</i>     | Blood  | 6.01E-08   | 0.00069   | 4.89E-07 | increasing     | 0          |
| <i>CR2</i>        | Blood  | 1.59E-08   | -0.00066  | 2.27E-06 | decreasing     | 0          |
| <i>DAPK2</i>      | Blood  | 2.48E-07   | 0.000689  | 5.63E-07 | increasing     | 0          |
| <i>DDR1</i>       | Blood  | 4.88E-08   | 0.000576  | 5.78E-05 | increasing     | 0          |
| <i>DLL1</i>       | Blood  | 2.37E-10   | 0.000709  | 1.99E-07 | increasing     | 0          |
| <i>EBF1</i>       | Blood  | 6.31E-09   | -0.00048  | 0.000872 | other          | 0          |
| <i>EFR3B</i>      | Blood  | 2.55E-07   | -6.98E-05 | 0.649506 | other          | 0          |
| <i>ELK4</i>       | Blood  | 1.61E-11   | -0.0004   | 0.006549 | other          | 0          |
| <i>EPHB2</i>      | Blood  | 2.91E-08   | 0.000108  | 0.479213 | other          | 0          |
| <i>EPHB6</i>      | Blood  | 5.15E-08   | 0.000534  | 0.000228 | other          | 0          |
| <i>FAM110C</i>    | Blood  | 4.82E-08   | 0.000761  | 1.38E-08 | increasing     | 0          |
| <i>FAM129C</i>    | Blood  | 1.84E-07   | -0.0005   | 0.000502 | other          | 0          |
| <i>FAM216B</i>    | Blood  | 3.16E-08   | -0.00035  | 0.019494 | other          | 0          |
| <i>FAM69A</i>     | Blood  | 1.39E-07   | -0.00059  | 2.52E-05 | decreasing     | 0          |

**Supplementary Table 9. Genes with a significant age effect from either ANOVA or linear regression. Beta is the regression coefficient, Pval is the p-value for the regression coefficient of expression on age (in days). Effect category is increasing if beta is positive and significant, decreasing if beta is negative and significant, and other if the ANOVA were significant rather than the linear regression. Local eQTL is 1 if the gene had a significant local eQTL**

| Gene                | Tissue | Anova.pval | Beta      | Pval     | EffectCategory | Local eQTL |
|---------------------|--------|------------|-----------|----------|----------------|------------|
| <i>FCER2</i>        | Blood  | 4.37E-08   | -0.00052  | 0.000259 | other          | 0          |
| <i>FCRL1</i>        | Blood  | 1.30E-07   | -0.00045  | 0.00205  | other          | 0          |
| <i>FCRLA</i>        | Blood  | 1.61E-07   | -0.00045  | 0.001604 | other          | 0          |
| <i>GEN1</i>         | Blood  | 7.79E-08   | -0.00055  | 0.00011  | other          | 0          |
| <i>GPR160</i>       | Blood  | 6.80E-08   | -0.00027  | 0.075089 | other          | 0          |
| <i>HHIPL1</i>       | Blood  | 1.98E-08   | 0.000138  | 0.366392 | other          | 0          |
| <i>HNRNPA3</i>      | Blood  | 1.17E-07   | -0.00045  | 0.002252 | other          | 0          |
| <i>HS3ST1</i>       | Blood  | 8.89E-08   | -0.00054  | 0.000156 | other          | 0          |
| <i>IFI6</i>         | Blood  | 4.29E-09   | -0.00034  | 0.025306 | other          | 0          |
| <i>IFNLR1</i>       | Blood  | 1.21E-07   | -0.00043  | 0.00265  | other          | 1          |
| <i>IGF2BP3</i>      | Blood  | 1.48E-07   | -0.00052  | 0.000322 | other          | 0          |
| <i>INADL</i>        | Blood  | 1.99E-08   | 0.000678  | 8.67E-07 | increasing     | 0          |
| <i>INPP5E</i>       | Blood  | 5.14E-09   | 0.000489  | 0.000845 | other          | 0          |
| <i>JUP</i>          | Blood  | 1.29E-07   | -0.0004   | 0.006566 | other          | 0          |
| <i>KCNA2</i>        | Blood  | 1.22E-07   | 0.00036   | 0.014856 | other          | 0          |
| <i>KCNQ5</i>        | Blood  | 2.71E-08   | -0.00071  | 1.48E-07 | decreasing     | 0          |
| <i>KIAA0040</i>     | Blood  | 1.11E-07   | -0.00036  | 0.014713 | other          | 0          |
| <i>KIAA1524</i>     | Blood  | 1.76E-08   | -0.00068  | 8.28E-07 | decreasing     | 0          |
| <i>KIF21A</i>       | Blood  | 1.93E-07   | 0.000693  | 3.82E-07 | increasing     | 0          |
| <i>KLHL14</i>       | Blood  | 4.03E-09   | -0.00066  | 2.00E-06 | decreasing     | 0          |
| <i>LATS2</i>        | Blood  | 9.86E-08   | 9.23E-05  | 0.538339 | other          | 0          |
| <i>LDB2</i>         | Blood  | 1.35E-07   | -0.00057  | 5.17E-05 | decreasing     | 0          |
| <i>LEF1</i>         | Blood  | 2.15E-07   | -0.00056  | 9.55E-05 | decreasing     | 0          |
| <i>LOC103214438</i> | Blood  | 2.03E-08   | -0.00046  | 0.001669 | other          | 0          |
| <i>LOC103214439</i> | Blood  | 5.46E-08   | -0.00043  | 0.003143 | other          | 0          |
| <i>LOC103214991</i> | Blood  | 8.67E-08   | -0.00073  | 8.55E-08 | decreasing     | 0          |
| <i>LOC103217853</i> | Blood  | 2.11E-08   | -3.76E-07 | 0.99805  | other          | 0          |
| <i>LOC103218130</i> | Blood  | 7.38E-07   | -0.00074  | 3.32E-08 | decreasing     | 0          |
| <i>LOC103220571</i> | Blood  | 4.18E-08   | -0.00039  | 0.007641 | other          | 0          |
| <i>LOC103221838</i> | Blood  | 4.09E-09   | -0.00066  | 2.03E-06 | decreasing     | 0          |
| <i>LOC103222076</i> | Blood  | 1.80E-05   | -0.0007   | 2.59E-07 | decreasing     | 0          |
| <i>LOC103222418</i> | Blood  | 2.36E-08   | 4.28E-05  | 0.779213 | other          | 0          |
| <i>LOC103224147</i> | Blood  | 1.59E-07   | 0.000282  | 0.061705 | other          | 0          |
| <i>LOC103225055</i> | Blood  | 1.83E-09   | -0.0001   | 0.499157 | other          | 0          |
| <i>LOC103225074</i> | Blood  | 1.17E-08   | -6.31E-05 | 0.680106 | other          | 0          |
| <i>LOC103225142</i> | Blood  | 5.37E-08   | -2.31E-05 | 0.87638  | other          | 0          |
| <i>LOC103226462</i> | Blood  | 1.04E-07   | 0.000117  | 0.428418 | other          | 0          |
| <i>LOC103229635</i> | Blood  | 5.26E-08   | -0.00069  | 6.51E-07 | decreasing     | 0          |
| <i>LOC103230929</i> | Blood  | 1.25E-09   | 0.000192  | 0.205963 | other          | 0          |
| <i>LOC103231026</i> | Blood  | 3.63E-08   | 0.00034   | 0.023124 | other          | 0          |

**Supplementary Table 9. Genes with a significant age effect from either ANOVA or linear regression. Beta is the regression coefficient, Pval is the p-value for the regression coefficient of expression on age (in days). Effect category is increasing if beta is positive and significant, decreasing if beta is negative and significant, and other if the ANOVA were significant rather than the linear regression. Local eQTL is 1 if the gene had a significant local eQTL**

| Gene                | Tissue | Anova.pval | Beta      | Pval     | EffectCategory | Local eQTL |
|---------------------|--------|------------|-----------|----------|----------------|------------|
| <i>LOC103231767</i> | Blood  | 7.64E-10   | -5.17E-05 | 0.735427 | other          | 0          |
| <i>LOC103232315</i> | Blood  | 1.77E-07   | 4.84E-05  | 0.750523 | other          | 0          |
| <i>LOC103232530</i> | Blood  | 2.47E-07   | -2.24E-05 | 0.883424 | other          | 0          |
| <i>LOC103232593</i> | Blood  | 2.02E-07   | -0.00063  | 6.01E-06 | decreasing     | 0          |
| <i>LOC103232959</i> | Blood  | 2.65E-08   | -0.00052  | 0.000254 | other          | 0          |
| <i>LOC103234031</i> | Blood  | 9.64E-08   | 0.000746  | 3.32E-08 | increasing     | 0          |
| <i>LOC103235169</i> | Blood  | 9.85E-08   | 0.000252  | 0.093873 | other          | 0          |
| <i>LOC103237606</i> | Blood  | 1.22E-07   | 0.000478  | 0.000926 | other          | 0          |
| <i>LOC103237774</i> | Blood  | 2.80E-08   | -0.00067  | 1.51E-06 | decreasing     | 0          |
| <i>LOC103239517</i> | Blood  | 5.91E-08   | 7.82E-06  | 0.959405 | other          | 0          |
| <i>LOC103239668</i> | Blood  | 1.75E-07   | 0.000547  | 0.000144 | other          | 0          |
| <i>LOC103240114</i> | Blood  | 1.97E-07   | -1.31E-07 | 0.999321 | other          | 0          |
| <i>LOC103241811</i> | Blood  | 2.94E-08   | -0.00045  | 0.002046 | other          | 0          |
| <i>LOC103242065</i> | Blood  | 1.42E-07   | 0.000188  | 0.203367 | other          | 0          |
| <i>LOC103244408</i> | Blood  | 9.39E-08   | -0.00046  | 0.00157  | other          | 0          |
| <i>LOC103245978</i> | Blood  | 3.03E-08   | 0.000375  | 0.012135 | other          | 0          |
| <i>LOC103246317</i> | Blood  | 2.31E-08   | -0.00059  | 3.66E-05 | decreasing     | 0          |
| <i>LOC103246543</i> | Blood  | 7.38E-08   | -0.00049  | 0.000715 | other          | 0          |
| <i>LOC103248861</i> | Blood  | 5.37E-06   | 0.000711  | 2.13E-07 | increasing     | 0          |
| <i>LRP12</i>        | Blood  | 6.60E-08   | -0.0006   | 2.33E-05 | decreasing     | 0          |
| <i>LTBP3</i>        | Blood  | 1.30E-09   | -5.31E-05 | 0.729359 | other          | 0          |
| <i>LZTFL1</i>       | Blood  | 1.80E-08   | -0.00073  | 5.91E-08 | decreasing     | 0          |
| <i>MAPK1IP1L</i>    | Blood  | 1.60E-07   | -0.0004   | 0.006007 | other          | 0          |
| <i>MBNL3</i>        | Blood  | 4.93E-09   | -0.00025  | 0.087893 | other          | 0          |
| <i>MCF2L</i>        | Blood  | 7.96E-08   | 9.53E-05  | 0.534342 | other          | 0          |
| <i>MID2</i>         | Blood  | 1.27E-06   | 0.000766  | 1.05E-08 | increasing     | 0          |
| <i>MMP11</i>        | Blood  | 4.87E-09   | -0.00018  | 0.234224 | other          | 0          |
| <i>MS4A1</i>        | Blood  | 9.30E-08   | -0.00046  | 0.001424 | other          | 0          |
| <i>NBEA</i>         | Blood  | 4.08E-08   | -0.00058  | 3.08E-05 | decreasing     | 0          |
| <i>NEK2</i>         | Blood  | 4.13E-08   | -0.00039  | 0.008315 | other          | 0          |
| <i>NETO2</i>        | Blood  | 9.15E-08   | -0.00054  | 0.000126 | other          | 0          |
| <i>NMUR1</i>        | Blood  | 7.46E-08   | 0.000716  | 1.56E-07 | increasing     | 0          |
| <i>NREP</i>         | Blood  | 2.36E-09   | -0.00081  | 6.61E-10 | decreasing     | 0          |
| <i>NTN3</i>         | Blood  | 3.70E-08   | 0.000179  | 0.240786 | other          | 0          |
| <i>NTRK1</i>        | Blood  | 1.06E-07   | -3.08E-05 | 0.841051 | other          | 0          |
| <i>PAX5</i>         | Blood  | 3.22E-09   | -0.00053  | 0.000223 | other          | 0          |
| <i>PDZD4</i>        | Blood  | 6.59E-07   | 0.000718  | 5.33E-08 | increasing     | 0          |
| <i>PGM5</i>         | Blood  | 1.98E-07   | 0.000675  | 1.02E-06 | increasing     | 0          |
| <i>PHLDB3</i>       | Blood  | 2.33E-07   | 0.00034   | 0.023705 | other          | 0          |
| <i>PLCD1</i>        | Blood  | 5.23E-08   | 0.000468  | 0.001419 | other          | 0          |

**Supplementary Table 9. Genes with a significant age effect from either ANOVA or linear regression. Beta is the regression coefficient, Pval is the p-value for the regression coefficient of expression on age (in days). Effect category is increasing if beta is positive and significant, decreasing if beta is negative and significant, and other if the ANOVA were significant rather than the linear regression. Local eQTL is 1 if the gene had a significant local eQTL**

| Gene            | Tissue | Anova.pval | Beta      | Pval     | EffectCategory | Local eQTL |
|-----------------|--------|------------|-----------|----------|----------------|------------|
| <i>PLD2</i>     | Blood  | 9.31E-08   | 0.000476  | 0.001177 | other          | 0          |
| <i>PMEPA1</i>   | Blood  | 5.88E-08   | -0.00068  | 5.51E-07 | decreasing     | 0          |
| <i>PPFIA4</i>   | Blood  | 5.41E-08   | 6.63E-05  | 0.665763 | other          | 0          |
| <i>PPP1CB</i>   | Blood  | 5.06E-08   | -0.00031  | 0.034605 | other          | 0          |
| <i>PRDM8</i>    | Blood  | 2.40E-08   | 0.000543  | 0.00017  | other          | 0          |
| <i>PSAT1</i>    | Blood  | 1.68E-07   | -0.00066  | 1.20E-06 | decreasing     | 0          |
| <i>R3HDM1</i>   | Blood  | 1.93E-08   | -0.00046  | 0.001887 | other          | 0          |
| <i>RAB30</i>    | Blood  | 4.21E-08   | -0.00061  | 1.51E-05 | decreasing     | 0          |
| <i>RALGPS2</i>  | Blood  | 2.16E-08   | -0.00051  | 0.000401 | other          | 0          |
| <i>RAPGEF5</i>  | Blood  | 2.54E-10   | -0.00072  | 1.23E-07 | decreasing     | 0          |
| <i>RFX2</i>     | Blood  | 4.65E-08   | -5.32E-05 | 0.729063 | other          | 0          |
| <i>RIN1</i>     | Blood  | 1.45E-07   | 0.000343  | 0.022185 | other          | 0          |
| <i>RIN2</i>     | Blood  | 1.76E-07   | -9.06E-05 | 0.548428 | other          | 0          |
| <i>SCAI</i>     | Blood  | 6.10E-08   | -0.00031  | 0.034368 | other          | 0          |
| <i>SCIN</i>     | Blood  | 1.83E-07   | 6.63E-05  | 0.658968 | other          | 0          |
| <i>SEMA4C</i>   | Blood  | 3.62E-08   | 0.000194  | 0.202818 | other          | 0          |
| <i>SEMA4F</i>   | Blood  | 2.29E-08   | 0.000618  | 1.28E-05 | increasing     | 0          |
| <i>SFRP4</i>    | Blood  | 8.23E-09   | -0.00017  | 0.264873 | other          | 0          |
| <i>SFXN5</i>    | Blood  | 1.27E-07   | 0.000182  | 0.232415 | other          | 0          |
| <i>SLC16A10</i> | Blood  | 8.51E-08   | -0.00025  | 0.099055 | other          | 0          |
| <i>SLC25A10</i> | Blood  | 8.79E-08   | 5.36E-05  | 0.727143 | other          | 0          |
| <i>SLC35E4</i>  | Blood  | 1.37E-07   | 0.000189  | 0.216585 | other          | 0          |
| <i>SOX4</i>     | Blood  | 2.59E-08   | -0.00075  | 2.01E-08 | decreasing     | 0          |
| <i>SPTBN5</i>   | Blood  | 2.06E-07   | -3.60E-05 | 0.814449 | other          | 0          |
| <i>ST8SIA1</i>  | Blood  | 9.50E-08   | 0.000738  | 4.63E-08 | increasing     | 0          |
| <i>STAB1</i>    | Blood  | 1.25E-09   | 0.000111  | 0.469968 | other          | 0          |
| <i>STOX1</i>    | Blood  | 2.04E-07   | -0.00056  | 8.64E-05 | decreasing     | 0          |
| <i>TAF4B</i>    | Blood  | 7.37E-08   | -0.00075  | 3.46E-08 | decreasing     | 0          |
| <i>TBKBP1</i>   | Blood  | 2.39E-07   | 0.000534  | 0.000217 | other          | 0          |
| <i>TCF4</i>     | Blood  | 1.78E-07   | -0.00049  | 0.000659 | other          | 0          |
| <i>TCL1A</i>    | Blood  | 6.60E-09   | -0.00065  | 2.60E-06 | decreasing     | 0          |
| <i>TET1</i>     | Blood  | 1.18E-07   | -0.00057  | 6.60E-05 | decreasing     | 0          |
| <i>TIMELESS</i> | Blood  | 5.49E-08   | -2.38E-05 | 0.876199 | other          | 0          |
| <i>TMEM44</i>   | Blood  | 1.59E-07   | 0.000432  | 0.003481 | other          | 0          |
| <i>TPD52</i>    | Blood  | 1.74E-07   | -0.00051  | 0.000314 | other          | 0          |
| <i>TSPAN13</i>  | Blood  | 6.12E-08   | -0.00068  | 6.91E-07 | decreasing     | 0          |
| <i>TSPO2</i>    | Blood  | 1.11E-07   | -4.52E-05 | 0.768144 | other          | 0          |
| <i>VPREB3</i>   | Blood  | 6.12E-10   | -0.00057  | 3.35E-05 | decreasing     | 0          |
| <i>VWA2</i>     | Blood  | 2.00E-07   | -0.0004   | 0.00674  | other          | 0          |
| <i>WNT11</i>    | Blood  | 4.32E-08   | 0.000717  | 1.60E-07 | increasing     | 0          |



**Supplementary Table 9. Genes with a significant age effect from either ANOVA or linear regression. Beta is the regression coefficient, Pval is the p-value for the regression coefficient of expression on age (in days). Effect category is increasing if beta is positive and significant, decreasing if beta is negative and significant, and other if the ANOVA were significant rather than the linear regression. Local eQTL is 1 if the gene had a significant local eQTL**

| Gene           | Tissue  | Anova.pval | Beta      | Pval     | EffectCategory | Local eQTL |
|----------------|---------|------------|-----------|----------|----------------|------------|
| <i>XKRX</i>    | Blood   | 4.19E-08   | -0.00037  | 0.011613 | other          | 0          |
| <i>ZDHC21</i>  | Blood   | 2.34E-08   | -0.00046  | 0.001692 | other          | 0          |
| <i>ZNF606</i>  | Blood   | 4.09E-06   | -0.00072  | 1.35E-07 | decreasing     | 0          |
| <i>ZNF709</i>  | Blood   | 1.33E-08   | -0.00071  | 2.70E-07 | decreasing     | 0          |
| <i>AACS</i>    | Caudate | 1.01E-10   | 0.000137  | 0.358733 | other          | 0          |
| <i>AAR2</i>    | Caudate | 1.24E-08   | -0.00022  | 0.129388 | other          | 0          |
| <i>AARS2</i>   | Caudate | 4.46E-08   | 0.000353  | 0.016358 | other          | 0          |
| <i>AATK</i>    | Caudate | 1.42E-11   | 0.000786  | 1.43E-09 | increasing     | 0          |
| <i>ABCA2</i>   | Caudate | 2.59E-07   | 0.000752  | 9.28E-09 | increasing     | 0          |
| <i>ABCA3</i>   | Caudate | 3.62E-12   | 0.000549  | 0.000138 | other          | 0          |
| <i>ABCA8</i>   | Caudate | 5.28E-18   | 0.000846  | 2.97E-12 | increasing     | 0          |
| <i>ABCB9</i>   | Caudate | 3.08E-11   | 0.000686  | 4.61E-07 | increasing     | 0          |
| <i>ABCC10</i>  | Caudate | 9.85E-08   | 0.000161  | 0.284924 | other          | 0          |
| <i>ABCC8</i>   | Caudate | 2.27E-08   | 0.000763  | 4.02E-09 | increasing     | 1          |
| <i>ABCE1</i>   | Caudate | 7.50E-07   | -0.00071  | 1.19E-07 | decreasing     | 0          |
| <i>ABCF3</i>   | Caudate | 6.73E-11   | 0.000605  | 1.80E-05 | increasing     | 0          |
| <i>ABCG1</i>   | Caudate | 1.44E-14   | 0.000824  | 1.71E-10 | increasing     | 0          |
| <i>ABCG2</i>   | Caudate | 7.81E-10   | -0.00011  | 0.469516 | other          | 0          |
| <i>ABHD13</i>  | Caudate | 1.14E-06   | -0.00072  | 1.04E-07 | decreasing     | 0          |
| <i>ABHD17A</i> | Caudate | 8.53E-09   | 0.000415  | 0.004495 | other          | 0          |
| <i>ABHD5</i>   | Caudate | 1.71E-08   | -0.00077  | 3.53E-09 | decreasing     | 0          |
| <i>ABHD8</i>   | Caudate | 1.75E-09   | 0.000648  | 2.37E-06 | increasing     | 0          |
| <i>ABLIM2</i>  | Caudate | 5.20E-08   | 0.000615  | 7.91E-06 | increasing     | 1          |
| <i>ABTB2</i>   | Caudate | 3.61E-12   | 0.000667  | 1.30E-06 | increasing     | 0          |
| <i>ACAD10</i>  | Caudate | 9.23E-10   | 0.000759  | 1.19E-08 | increasing     | 0          |
| <i>ACADS</i>   | Caudate | 1.19E-07   | 0.000676  | 9.41E-07 | increasing     | 0          |
| <i>ACAP3</i>   | Caudate | 5.78E-09   | 0.000571  | 6.65E-05 | increasing     | 0          |
| <i>ACKR1</i>   | Caudate | 1.94E-08   | 0.00016   | 0.274571 | other          | 0          |
| <i>ACO1</i>    | Caudate | 4.90E-08   | 0.000351  | 0.016632 | other          | 1          |
| <i>ACOT11</i>  | Caudate | 2.27E-14   | 0.000864  | 3.43E-12 | increasing     | 0          |
| <i>ACOT7</i>   | Caudate | 1.72E-07   | 0.000196  | 0.194521 | other          | 0          |
| <i>ACSBG1</i>  | Caudate | 6.88E-07   | 0.000706  | 1.30E-07 | increasing     | 0          |
| <i>ACSF3</i>   | Caudate | 3.36E-10   | 0.00057   | 5.95E-05 | increasing     | 0          |
| <i>ACSL4</i>   | Caudate | 1.90E-08   | -0.00077  | 4.05E-09 | decreasing     | 0          |
| <i>ACSL6</i>   | Caudate | 2.37E-07   | -1.45E-05 | 0.922416 | other          | 0          |
| <i>ACSM5</i>   | Caudate | 4.10E-15   | 0.000864  | 4.59E-12 | increasing     | 0          |
| <i>ACSS2</i>   | Caudate | 4.19E-08   | 0.000687  | 2.05E-07 | increasing     | 0          |
| <i>ACTA1</i>   | Caudate | 4.27E-08   | 0.000765  | 8.61E-09 | increasing     | 0          |
| <i>ACTB</i>    | Caudate | 2.22E-07   | -0.00032  | 0.033575 | other          | 0          |
| <i>ACTC1</i>   | Caudate | 5.00E-09   | -0.00066  | 1.11E-06 | decreasing     | 0          |

**Supplementary Table 9. Genes with a significant age effect from either ANOVA or linear regression. Beta is the regression coefficient, Pval is the p-value for the regression coefficient of expression on age (in days). Effect category is increasing if beta is positive and significant, decreasing if beta is negative and significant, and other if the ANOVA were significant rather than the linear regression. Local eQTL is 1 if the gene had a significant local eQTL**

| Gene            | Tissue  | Anova.pval | Beta     | Pval     | EffectCategory | Local eQTL |
|-----------------|---------|------------|----------|----------|----------------|------------|
| <i>ACTL6B</i>   | Caudate | 1.23E-09   | 0.00033  | 0.027775 | other          | 0          |
| <i>ACTN1</i>    | Caudate | 1.28E-09   | 0.000675 | 2.50E-07 | increasing     | 0          |
| <i>ACTR2</i>    | Caudate | 2.96E-10   | -0.00034 | 0.01633  | other          | 0          |
| <i>ACTR3</i>    | Caudate | 2.19E-05   | -0.00072 | 1.17E-07 | decreasing     | 0          |
| <i>ACTR3B</i>   | Caudate | 2.22E-11   | -0.00078 | 5.19E-09 | decreasing     | 0          |
| <i>ACTR5</i>    | Caudate | 3.37E-10   | 0.000594 | 3.04E-05 | increasing     | 1          |
| <i>ADA</i>      | Caudate | 4.97E-15   | 0.000828 | 5.82E-12 | increasing     | 0          |
| <i>ADAM15</i>   | Caudate | 1.37E-09   | 0.000705 | 2.70E-07 | increasing     | 0          |
| <i>ADAM19</i>   | Caudate | 1.87E-11   | -0.00077 | 1.58E-09 | decreasing     | 0          |
| <i>ADAM32</i>   | Caudate | 1.87E-08   | 0.000696 | 2.81E-07 | increasing     | 0          |
| <i>ADAM33</i>   | Caudate | 5.45E-14   | 0.000863 | 8.05E-12 | increasing     | 0          |
| <i>ADAM8</i>    | Caudate | 1.90E-11   | 0.000817 | 2.05E-10 | increasing     | 0          |
| <i>ADAMTS10</i> | Caudate | 7.64E-10   | 0.000285 | 0.048069 | other          | 0          |
| <i>ADAMTS18</i> | Caudate | 1.82E-11   | -0.00073 | 4.21E-08 | decreasing     | 1          |
| <i>ADAMTS19</i> | Caudate | 2.84E-08   | 4.21E-05 | 0.779537 | other          | 0          |
| <i>ADAMTS3</i>  | Caudate | 2.73E-07   | -0.00072 | 5.54E-08 | decreasing     | 1          |
| <i>ADAMTSL1</i> | Caudate | 1.12E-07   | -0.00051 | 0.000243 | other          | 0          |
| <i>ADAMTSL2</i> | Caudate | 1.63E-07   | -0.0002  | 0.181782 | other          | 0          |
| <i>ADAP1</i>    | Caudate | 1.94E-09   | 0.000564 | 7.71E-05 | increasing     | 0          |
| <i>ADARB2</i>   | Caudate | 1.23E-07   | 0.000135 | 0.36814  | other          | 0          |
| <i>ADAT3</i>    | Caudate | 3.32E-07   | 0.000721 | 1.17E-07 | increasing     | 0          |
| <i>ADCK3</i>    | Caudate | 5.73E-10   | 0.000638 | 3.81E-06 | increasing     | 0          |
| <i>ADCK4</i>    | Caudate | 8.11E-09   | 0.000622 | 7.68E-06 | increasing     | 0          |
| <i>ADCK5</i>    | Caudate | 2.56E-10   | 0.00024  | 0.110816 | other          | 0          |
| <i>ADCY1</i>    | Caudate | 2.40E-08   | -0.00044 | 0.002229 | other          | 0          |
| <i>ADCY6</i>    | Caudate | 7.79E-08   | 0.000137 | 0.35559  | other          | 0          |
| <i>ADCY8</i>    | Caudate | 1.23E-08   | -0.00033 | 0.024421 | other          | 0          |
| <i>ADIPOR2</i>  | Caudate | 1.94E-10   | 0.000771 | 1.81E-09 | increasing     | 0          |
| <i>ADIRF</i>    | Caudate | 1.61E-09   | 0.000511 | 0.000372 | other          | 0          |
| <i>ADO</i>      | Caudate | 1.05E-07   | -0.00021 | 0.160211 | other          | 0          |
| <i>ADORA1</i>   | Caudate | 5.39E-12   | 0.000149 | 0.313466 | other          | 1          |
| <i>ADRB1</i>    | Caudate | 2.13E-10   | 0.000677 | 6.53E-07 | increasing     | 0          |
| <i>ADRBK1</i>   | Caudate | 1.92E-08   | 0.000439 | 0.002906 | other          | 0          |
| <i>ADSSL1</i>   | Caudate | 4.64E-13   | 0.000799 | 6.57E-10 | increasing     | 0          |
| <i>AES</i>      | Caudate | 4.26E-08   | 2.98E-05 | 0.843197 | other          | 0          |
| <i>AFAP1</i>    | Caudate | 2.41E-07   | -0.00035 | 0.014216 | other          | 0          |
| <i>AFF1</i>     | Caudate | 1.07E-07   | 0.00019  | 0.201532 | other          | 0          |
| <i>AFF2</i>     | Caudate | 1.45E-07   | -0.00039 | 0.00915  | other          | 0          |
| <i>AGAP3</i>    | Caudate | 3.53E-09   | 0.000735 | 4.70E-08 | increasing     | 0          |
| <i>AGFG1</i>    | Caudate | 2.31E-07   | -0.0006  | 2.02E-05 | decreasing     | 0          |

**Supplementary Table 9. Genes with a significant age effect from either ANOVA or linear regression. Beta is the regression coefficient, Pval is the p-value for the regression coefficient of expression on age (in days). Effect category is increasing if beta is positive and significant, decreasing if beta is negative and significant, and other if the ANOVA were significant rather than the linear regression. Local eQTL is 1 if the gene had a significant local eQTL**

| Gene            | Tissue  | Anova.pval | Beta     | Pval     | EffectCategory | Local eQTL |
|-----------------|---------|------------|----------|----------|----------------|------------|
| <i>AGFG2</i>    | Caudate | 4.32E-09   | 0.000416 | 0.003927 | other          | 0          |
| <i>AGK</i>      | Caudate | 1.41E-07   | -0.00066 | 9.63E-07 | decreasing     | 1          |
| <i>AGMO</i>     | Caudate | 3.31E-12   | 0.000727 | 6.21E-08 | increasing     | 0          |
| <i>AGO4</i>     | Caudate | 5.92E-11   | -0.00056 | 8.67E-05 | decreasing     | 0          |
| <i>AGPAT9</i>   | Caudate | 2.38E-11   | 0.000606 | 6.26E-06 | increasing     | 0          |
| <i>AGPS</i>     | Caudate | 7.43E-08   | -0.00076 | 8.28E-09 | decreasing     | 0          |
| <i>AGT</i>      | Caudate | 6.03E-13   | 0.000731 | 3.68E-08 | increasing     | 1          |
| <i>AHCY</i>     | Caudate | 2.33E-08   | 0.000716 | 2.47E-08 | increasing     | 0          |
| <i>AHCYL2</i>   | Caudate | 2.90E-08   | 3.49E-05 | 0.817967 | other          | 0          |
| <i>AHR</i>      | Caudate | 8.18E-09   | -0.00072 | 2.36E-08 | decreasing     | 0          |
| <i>AIF1L</i>    | Caudate | 1.31E-08   | 0.00069  | 5.41E-07 | increasing     | 0          |
| <i>AIFM3</i>    | Caudate | 3.22E-08   | 0.000501 | 0.000588 | other          | 0          |
| <i>AIRE</i>     | Caudate | 2.81E-13   | 0.00087  | 2.04E-12 | increasing     | 0          |
| <i>AJAP1</i>    | Caudate | 1.66E-08   | 0.000148 | 0.325113 | other          | 0          |
| <i>AJUBA</i>    | Caudate | 1.94E-07   | -0.00058 | 2.22E-05 | decreasing     | 0          |
| <i>AKAP2</i>    | Caudate | 1.31E-07   | -0.00012 | 0.42402  | other          | 0          |
| <i>AKAP8</i>    | Caudate | 6.29E-12   | 0.000751 | 2.06E-08 | increasing     | 0          |
| <i>AKAP9</i>    | Caudate | 9.18E-09   | -0.00076 | 1.04E-08 | decreasing     | 0          |
| <i>AKR1B1</i>   | Caudate | 1.39E-10   | 0.000726 | 2.30E-08 | increasing     | 0          |
| <i>AKT1</i>     | Caudate | 8.57E-11   | 0.000494 | 0.000705 | other          | 0          |
| <i>AKTIP</i>    | Caudate | 4.89E-08   | 5.28E-05 | 0.723976 | other          | 0          |
| <i>ALAD</i>     | Caudate | 7.69E-11   | 0.000697 | 7.29E-08 | increasing     | 0          |
| <i>ALDH16A1</i> | Caudate | 4.30E-09   | 0.000522 | 0.000268 | other          | 1          |
| <i>ALDOA</i>    | Caudate | 3.50E-14   | 0.000837 | 2.73E-12 | increasing     | 0          |
| <i>ALDOC</i>    | Caudate | 2.56E-09   | 0.000675 | 4.79E-07 | increasing     | 0          |
| <i>ALG12</i>    | Caudate | 3.79E-09   | 0.000663 | 1.94E-06 | increasing     | 0          |
| <i>ALG3</i>     | Caudate | 2.59E-07   | 6.78E-05 | 0.658238 | other          | 0          |
| <i>ALKBH4</i>   | Caudate | 5.06E-11   | 0.00017  | 0.263932 | other          | 0          |
| <i>ALKBH5</i>   | Caudate | 1.56E-08   | 0.000637 | 5.58E-06 | increasing     | 0          |
| <i>ALKBH7</i>   | Caudate | 1.20E-07   | 0.000517 | 0.000378 | other          | 0          |
| <i>AMBRA1</i>   | Caudate | 1.91E-09   | 0.000172 | 0.250323 | other          | 0          |
| <i>AMDHD2</i>   | Caudate | 2.77E-13   | 0.000368 | 0.012798 | other          | 0          |
| <i>AMER2</i>    | Caudate | 4.38E-11   | 0.000804 | 1.12E-10 | increasing     | 0          |
| <i>AMIGO2</i>   | Caudate | 4.52E-14   | -0.0008  | 2.15E-10 | decreasing     | 0          |
| <i>AMIGO3</i>   | Caudate | 2.15E-10   | 0.000684 | 6.17E-07 | increasing     | 0          |
| <i>AMPD2</i>    | Caudate | 1.85E-11   | 0.000658 | 1.26E-06 | increasing     | 0          |
| <i>AMT</i>      | Caudate | 2.42E-07   | 0.000794 | 1.14E-09 | increasing     | 0          |
| <i>ANGEL1</i>   | Caudate | 3.21E-10   | 0.000711 | 8.46E-08 | increasing     | 1          |
| <i>ANGPTL1</i>  | Caudate | 1.35E-07   | -0.00072 | 6.83E-08 | decreasing     | 0          |
| <i>ANGPTL3</i>  | Caudate | 1.78E-07   | -0.00066 | 2.02E-06 | decreasing     | 0          |

**Supplementary Table 9. Genes with a significant age effect from either ANOVA or linear regression. Beta is the regression coefficient, Pval is the p-value for the regression coefficient of expression on age (in days). Effect category is increasing if beta is positive and significant, decreasing if beta is negative and significant, and other if the ANOVA were significant rather than the linear regression. Local eQTL is 1 if the gene had a significant local eQTL**

| Gene            | Tissue  | Anova.pval | Beta      | Pval     | EffectCategory | Local eQTL |
|-----------------|---------|------------|-----------|----------|----------------|------------|
| <i>ANKRA2</i>   | Caudate | 3.51E-07   | -0.0007   | 1.56E-07 | decreasing     | 0          |
| <i>ANKRD12</i>  | Caudate | 4.36E-15   | -6.14E-05 | 0.679194 | other          | 0          |
| <i>ANKRD13A</i> | Caudate | 7.08E-11   | 0.000643  | 3.38E-06 | increasing     | 0          |
| <i>ANKRD13C</i> | Caudate | 7.74E-08   | -0.00069  | 1.38E-07 | decreasing     | 0          |
| <i>ANKRD13D</i> | Caudate | 5.24E-11   | 0.000556  | 0.000107 | other          | 0          |
| <i>ANKRD16</i>  | Caudate | 4.17E-07   | 0.000709  | 2.20E-07 | increasing     | 0          |
| <i>ANKRD23</i>  | Caudate | 1.61E-09   | 0.000692  | 3.34E-07 | increasing     | 0          |
| <i>ANKRD34B</i> | Caudate | 1.50E-08   | -0.00066  | 1.82E-06 | decreasing     | 0          |
| <i>ANKRD42</i>  | Caudate | 2.76E-08   | 0.00049   | 0.000688 | other          | 0          |
| <i>ANKRD44</i>  | Caudate | 1.20E-08   | -0.00053  | 9.95E-05 | decreasing     | 0          |
| <i>ANKRD50</i>  | Caudate | 2.74E-19   | -0.0009   | 1.83E-14 | decreasing     | 0          |
| <i>ANKRD54</i>  | Caudate | 1.74E-08   | 9.18E-05  | 0.530763 | other          | 0          |
| <i>ANKRD55</i>  | Caudate | 5.10E-11   | -0.00075  | 1.01E-08 | decreasing     | 0          |
| <i>ANKRD63</i>  | Caudate | 1.14E-11   | 0.000294  | 0.043953 | other          | 0          |
| <i>ANKRD9</i>   | Caudate | 1.06E-08   | 0.00056   | 8.52E-05 | increasing     | 0          |
| <i>ANKS1B</i>   | Caudate | 1.03E-07   | -0.00043  | 0.002117 | other          | 0          |
| <i>ANKS3</i>    | Caudate | 8.46E-09   | 0.000423  | 0.003277 | other          | 0          |
| <i>ANKZF1</i>   | Caudate | 1.84E-07   | 0.000502  | 0.000386 | other          | 0          |
| <i>ANLN</i>     | Caudate | 4.42E-11   | 0.000424  | 0.003345 | other          | 0          |
| <i>ANO2</i>     | Caudate | 9.08E-20   | 0.000896  | 3.11E-14 | increasing     | 0          |
| <i>ANO7</i>     | Caudate | 4.71E-08   | 0.00073   | 7.40E-08 | increasing     | 0          |
| <i>ANO8</i>     | Caudate | 9.21E-10   | 0.000242  | 0.104472 | other          | 0          |
| <i>ANXA11</i>   | Caudate | 2.51E-09   | 0.000558  | 6.35E-05 | increasing     | 0          |
| <i>AP1M1</i>    | Caudate | 5.69E-12   | 0.000208  | 0.161202 | other          | 0          |
| <i>AP2A2</i>    | Caudate | 2.93E-11   | 0.000489  | 0.00083  | other          | 0          |
| <i>AP2M1</i>    | Caudate | 5.45E-08   | -0.00011  | 0.477277 | other          | 0          |
| <i>AP3D1</i>    | Caudate | 9.29E-08   | 0.000633  | 6.73E-06 | increasing     | 0          |
| <i>AP3M1</i>    | Caudate | 9.84E-11   | -0.00043  | 0.003294 | other          | 0          |
| <i>AP3S1</i>    | Caudate | 3.38E-10   | -0.00062  | 9.00E-06 | decreasing     | 0          |
| <i>AP4M1</i>    | Caudate | 5.05E-08   | 0.000262  | 0.073729 | other          | 0          |
| <i>AP4S1</i>    | Caudate | 6.05E-08   | -0.00076  | 1.34E-08 | decreasing     | 0          |
| <i>AP5Z1</i>    | Caudate | 4.94E-10   | 0.000582  | 4.60E-05 | increasing     | 1          |
| <i>APAF1</i>    | Caudate | 4.97E-11   | -0.00081  | 5.46E-10 | decreasing     | 0          |
| <i>APBA2</i>    | Caudate | 5.27E-12   | 0.000339  | 0.020449 | other          | 0          |
| <i>APBB1</i>    | Caudate | 1.74E-09   | 0.000607  | 1.82E-05 | increasing     | 0          |
| <i>APC</i>      | Caudate | 2.03E-07   | -0.00075  | 3.08E-08 | decreasing     | 0          |
| <i>APC2</i>     | Caudate | 1.93E-11   | 0.000368  | 0.013061 | other          | 0          |
| <i>APEH</i>     | Caudate | 3.68E-08   | 0.000559  | 0.0001   | other          | 0          |
| <i>API5</i>     | Caudate | 4.11E-10   | -0.00025  | 0.089051 | other          | 0          |
| <i>APLP1</i>    | Caudate | 7.80E-12   | 0.000544  | 0.000165 | other          | 0          |

**Supplementary Table 9. Genes with a significant age effect from either ANOVA or linear regression. Beta is the regression coefficient, Pval is the p-value for the regression coefficient of expression on age (in days). Effect category is increasing if beta is positive and significant, decreasing if beta is negative and significant, and other if the ANOVA were significant rather than the linear regression. Local eQTL is 1 if the gene had a significant local eQTL**

| Gene             | Tissue  | Anova.pval | Beta      | Pval     | EffectCategory | Local eQTL |
|------------------|---------|------------|-----------|----------|----------------|------------|
| <i>APOC2</i>     | Caudate | 1.29E-07   | 0.000343  | 0.021041 | other          | 1          |
| <i>APOE</i>      | Caudate | 1.58E-07   | 0.000569  | 7.09E-05 | increasing     | 0          |
| <i>AQP1</i>      | Caudate | 3.16E-17   | 0.000862  | 2.77E-12 | increasing     | 0          |
| <i>AR</i>        | Caudate | 7.70E-10   | -0.00082  | 1.25E-10 | decreasing     | 0          |
| <i>AREL1</i>     | Caudate | 2.08E-14   | -0.00081  | 2.19E-10 | decreasing     | 0          |
| <i>ARFGAP2</i>   | Caudate | 2.18E-08   | 0.000342  | 0.0217   | other          | 0          |
| <i>ARFRP1</i>    | Caudate | 2.02E-08   | 0.000259  | 0.085768 | other          | 0          |
| <i>ARHGAP10</i>  | Caudate | 8.02E-06   | -0.00074  | 5.03E-08 | decreasing     | 0          |
| <i>ARHGAP20</i>  | Caudate | 5.10E-08   | -0.00068  | 8.77E-07 | decreasing     | 0          |
| <i>ARHGAP22</i>  | Caudate | 5.90E-08   | 0.0007    | 3.45E-07 | increasing     | 1          |
| <i>ARHGAP23</i>  | Caudate | 3.11E-10   | 0.000826  | 1.23E-10 | increasing     | 0          |
| <i>ARHGAP27</i>  | Caudate | 2.23E-13   | 0.000793  | 1.20E-10 | increasing     | 0          |
| <i>ARHGAP29</i>  | Caudate | 1.80E-07   | -0.00073  | 4.60E-08 | decreasing     | 0          |
| <i>ARHGAP39</i>  | Caudate | 2.24E-08   | 0.000445  | 0.001914 | other          | 0          |
| <i>ARHGAP9</i>   | Caudate | 5.17E-12   | 0.000825  | 3.07E-11 | increasing     | 0          |
| <i>ARHGDIB</i>   | Caudate | 1.24E-07   | -0.00042  | 0.004418 | other          | 0          |
| <i>ARHGDIG</i>   | Caudate | 1.47E-08   | 0.000523  | 0.000318 | other          | 0          |
| <i>ARHGEF10</i>  | Caudate | 6.13E-14   | 0.000829  | 3.09E-11 | increasing     | 0          |
| <i>ARHGEF10L</i> | Caudate | 1.05E-09   | 0.000273  | 0.069015 | other          | 0          |
| <i>ARHGEF12</i>  | Caudate | 2.34E-09   | -0.00078  | 3.00E-09 | decreasing     | 0          |
| <i>ARHGEF17</i>  | Caudate | 4.29E-10   | 0.000743  | 3.11E-08 | increasing     | 0          |
| <i>ARHGEF2</i>   | Caudate | 1.13E-10   | -0.00014  | 0.361579 | other          | 0          |
| <i>ARHGEF37</i>  | Caudate | 5.98E-11   | 0.000831  | 6.96E-11 | increasing     | 0          |
| <i>ARHGEF38</i>  | Caudate | 2.61E-06   | 0.000757  | 1.64E-08 | increasing     | 0          |
| <i>ARIH2</i>     | Caudate | 2.36E-10   | 1.29E-05  | 0.931755 | other          | 0          |
| <i>ARL10</i>     | Caudate | 3.24E-10   | 0.000367  | 0.011122 | other          | 0          |
| <i>ARL15</i>     | Caudate | 1.38E-07   | -0.00075  | 2.93E-08 | decreasing     | 0          |
| <i>ARL2</i>      | Caudate | 1.52E-11   | 0.00071   | 9.04E-08 | increasing     | 0          |
| <i>ARL4C</i>     | Caudate | 1.94E-10   | -0.00065  | 8.02E-07 | decreasing     | 0          |
| <i>ARL5B</i>     | Caudate | 1.72E-11   | -0.00082  | 1.43E-10 | decreasing     | 0          |
| <i>ARL6IP4</i>   | Caudate | 1.35E-09   | 0.000583  | 4.22E-05 | increasing     | 0          |
| <i>ARL8A</i>     | Caudate | 3.42E-08   | -0.00052  | 0.00023  | other          | 0          |
| <i>ARL8B</i>     | Caudate | 1.14E-14   | -0.00032  | 0.02389  | other          | 0          |
| <i>ARMC1</i>     | Caudate | 7.83E-08   | -0.0005   | 0.000577 | other          | 0          |
| <i>ARMC5</i>     | Caudate | 2.61E-07   | 0.000446  | 0.002459 | other          | 0          |
| <i>ARMC6</i>     | Caudate | 5.34E-11   | -3.87E-05 | 0.791768 | other          | 0          |
| <i>ARMC8</i>     | Caudate | 5.60E-11   | -0.00056  | 6.30E-05 | decreasing     | 0          |
| <i>ARMCX2</i>    | Caudate | 1.46E-09   | 0.000574  | 4.18E-05 | increasing     | 0          |
| <i>ARMCX5</i>    | Caudate | 2.21E-08   | -0.00062  | 6.72E-06 | decreasing     | 0          |
| <i>ARPC5L</i>    | Caudate | 7.39E-10   | 0.000201  | 0.172308 | other          | 0          |

**Supplementary Table 9. Genes with a significant age effect from either ANOVA or linear regression. Beta is the regression coefficient, Pval is the p-value for the regression coefficient of expression on age (in days). Effect category is increasing if beta is positive and significant, decreasing if beta is negative and significant, and other if the ANOVA were significant rather than the linear regression. Local eQTL is 1 if the gene had a significant local eQTL**

| Gene            | Tissue  | Anova.pval | Beta      | Pval     | EffectCategory | Local eQTL |
|-----------------|---------|------------|-----------|----------|----------------|------------|
| <i>ARRB1</i>    | Caudate | 3.03E-11   | 0.000488  | 0.000852 | other          | 0          |
| <i>ARRDC2</i>   | Caudate | 5.00E-09   | 0.000757  | 9.28E-09 | increasing     | 1          |
| <i>ARRDC4</i>   | Caudate | 4.13E-08   | -0.00068  | 1.93E-07 | decreasing     | 0          |
| <i>ARSB</i>     | Caudate | 2.32E-07   | -0.00063  | 7.04E-06 | decreasing     | 0          |
| <i>ARSG</i>     | Caudate | 8.64E-08   | 0.000628  | 5.52E-06 | increasing     | 0          |
| <i>ARVCF</i>    | Caudate | 3.58E-10   | 0.000513  | 0.000206 | other          | 0          |
| <i>ASB1</i>     | Caudate | 1.25E-09   | 0.00068   | 7.73E-07 | increasing     | 0          |
| <i>ASB6</i>     | Caudate | 4.68E-09   | 0.000382  | 0.010553 | other          | 0          |
| <i>ASGR1</i>    | Caudate | 3.20E-09   | 0.000737  | 3.79E-08 | increasing     | 0          |
| <i>ASIC4</i>    | Caudate | 1.62E-08   | 1.87E-05  | 0.899914 | other          | 0          |
| <i>ASL</i>      | Caudate | 3.86E-15   | 0.000802  | 4.37E-10 | increasing     | 0          |
| <i>ASPA</i>     | Caudate | 7.41E-09   | 0.000634  | 3.15E-06 | increasing     | 0          |
| <i>ASPM</i>     | Caudate | 3.93E-17   | -0.00087  | 5.78E-13 | decreasing     | 0          |
| <i>ASPRV1</i>   | Caudate | 1.21E-13   | 0.000824  | 5.90E-11 | increasing     | 0          |
| <i>ASPSCR1</i>  | Caudate | 1.04E-09   | 0.000652  | 2.94E-06 | increasing     | 0          |
| <i>ASTN2</i>    | Caudate | 1.79E-09   | -0.00032  | 0.030768 | other          | 0          |
| <i>ASUN</i>     | Caudate | 4.31E-10   | -0.00061  | 1.47E-05 | decreasing     | 0          |
| <i>ASXL3</i>    | Caudate | 8.34E-09   | -0.00072  | 2.46E-08 | decreasing     | 0          |
| <i>ATAD1</i>    | Caudate | 7.70E-06   | -0.00071  | 1.46E-07 | decreasing     | 0          |
| <i>ATF2</i>     | Caudate | 7.99E-10   | -0.00067  | 1.41E-06 | decreasing     | 0          |
| <i>ATF4</i>     | Caudate | 5.87E-08   | -0.00036  | 0.014969 | other          | 0          |
| <i>ATF5</i>     | Caudate | 3.84E-10   | 0.000155  | 0.300834 | other          | 0          |
| <i>ATF7IP</i>   | Caudate | 3.88E-15   | -0.00073  | 3.89E-08 | decreasing     | 0          |
| <i>ATG12</i>    | Caudate | 6.49E-07   | -0.00074  | 3.16E-08 | decreasing     | 0          |
| <i>ATG13</i>    | Caudate | 1.51E-08   | 0.000599  | 8.48E-06 | increasing     | 0          |
| <i>ATG16L1</i>  | Caudate | 5.94E-07   | -0.0007   | 2.38E-07 | decreasing     | 0          |
| <i>ATG2A</i>    | Caudate | 1.21E-08   | 0.000576  | 5.58E-05 | increasing     | 0          |
| <i>ATG4D</i>    | Caudate | 1.79E-10   | 0.000516  | 0.000373 | other          | 0          |
| <i>ATG7</i>     | Caudate | 2.16E-10   | 0.000711  | 5.50E-08 | increasing     | 0          |
| <i>ATG9A</i>    | Caudate | 1.96E-09   | 0.000676  | 8.14E-07 | increasing     | 0          |
| <i>ATP10B</i>   | Caudate | 6.34E-09   | 0.000771  | 1.78E-09 | increasing     | 0          |
| <i>ATP10D</i>   | Caudate | 2.57E-08   | -0.00061  | 6.25E-06 | decreasing     | 0          |
| <i>ATP11B</i>   | Caudate | 1.85E-07   | -0.00065  | 3.86E-06 | decreasing     | 0          |
| <i>ATP11C</i>   | Caudate | 2.31E-06   | -0.00072  | 5.46E-08 | decreasing     | 0          |
| <i>ATP13A2</i>  | Caudate | 5.93E-16   | 0.0008    | 1.08E-09 | increasing     | 0          |
| <i>ATP1B3</i>   | Caudate | 1.87E-07   | -0.00042  | 0.004449 | other          | 0          |
| <i>ATP6VOA2</i> | Caudate | 1.16E-07   | -0.0005   | 0.000408 | other          | 0          |
| <i>ATP6VOE2</i> | Caudate | 4.78E-08   | -0.00014  | 0.355094 | other          | 0          |
| <i>ATP6V1C1</i> | Caudate | 2.37E-07   | -9.89E-05 | 0.513239 | other          | 0          |
| <i>ATP7A</i>    | Caudate | 2.04E-08   | -0.00075  | 2.08E-08 | decreasing     | 0          |

**Supplementary Table 9. Genes with a significant age effect from either ANOVA or linear regression. Beta is the regression coefficient, Pval is the p-value for the regression coefficient of expression on age (in days). Effect category is increasing if beta is positive and significant, decreasing if beta is negative and significant, and other if the ANOVA were significant rather than the linear regression. Local eQTL is 1 if the gene had a significant local eQTL**

| Gene            | Tissue  | Anova.pval | Beta     | Pval     | EffectCategory | Local eQTL |
|-----------------|---------|------------|----------|----------|----------------|------------|
| <i>ATP9A</i>    | Caudate | 1.51E-08   | 0.000444 | 0.002617 | other          | 0          |
| <i>ATPAF1</i>   | Caudate | 5.92E-08   | 0.000621 | 3.39E-06 | increasing     | 0          |
| <i>ATR</i>      | Caudate | 7.19E-07   | -0.00071 | 6.85E-08 | decreasing     | 0          |
| <i>ATRIP</i>    | Caudate | 1.60E-09   | 0.000187 | 0.207419 | other          | 0          |
| <i>ATRNL1</i>   | Caudate | 1.86E-07   | -0.00054 | 7.54E-05 | decreasing     | 0          |
| <i>ATRX</i>     | Caudate | 2.93E-09   | -0.00078 | 5.48E-09 | decreasing     | 0          |
| <i>ATXN10</i>   | Caudate | 2.72E-11   | -0.00034 | 0.018683 | other          | 0          |
| <i>ATXN2</i>    | Caudate | 3.94E-09   | 7.30E-05 | 0.628129 | other          | 0          |
| <i>ATXN7L3</i>  | Caudate | 1.53E-10   | 0.00032  | 0.0337   | other          | 0          |
| <i>ATXN7L3B</i> | Caudate | 2.90E-08   | -0.00065 | 1.52E-06 | decreasing     | 0          |
| <i>AURKAIP1</i> | Caudate | 1.63E-07   | 0.000392 | 0.008474 | other          | 0          |
| <i>AVPI1</i>    | Caudate | 8.17E-08   | 0.000509 | 0.000283 | other          | 0          |
| <i>AVPR1A</i>   | Caudate | 3.01E-08   | -0.00052 | 0.000249 | other          | 0          |
| <i>AXIN1</i>    | Caudate | 2.22E-10   | 0.00061  | 1.59E-05 | increasing     | 0          |
| <i>AZIN1</i>    | Caudate | 1.24E-10   | -0.00077 | 1.48E-09 | decreasing     | 0          |
| <i>B3GALT2</i>  | Caudate | 4.83E-13   | -0.00082 | 1.34E-10 | decreasing     | 0          |
| <i>B3GALT6</i>  | Caudate | 6.51E-11   | 0.000127 | 0.394218 | other          | 0          |
| <i>B3GAT1</i>   | Caudate | 2.51E-07   | 0.000575 | 5.74E-05 | increasing     | 0          |
| <i>B3GNT9</i>   | Caudate | 1.25E-09   | 0.000371 | 0.010042 | other          | 0          |
| <i>B3GNTL1</i>  | Caudate | 1.16E-07   | 0.000662 | 1.94E-06 | increasing     | 0          |
| <i>B4GALNT1</i> | Caudate | 1.70E-08   | 0.000719 | 1.26E-07 | increasing     | 0          |
| <i>B4GALNT4</i> | Caudate | 1.95E-11   | 0.000599 | 2.29E-05 | increasing     | 0          |
| <i>B4GALT2</i>  | Caudate | 1.21E-07   | 0.000189 | 0.210349 | other          | 0          |
| <i>B4GALT6</i>  | Caudate | 3.15E-12   | -0.00082 | 1.92E-10 | decreasing     | 0          |
| <i>B4GALT7</i>  | Caudate | 6.45E-10   | 0.000311 | 0.033854 | other          | 0          |
| <i>B9D1</i>     | Caudate | 6.52E-08   | 0.00052  | 0.000338 | other          | 0          |
| <i>B9D2</i>     | Caudate | 5.82E-09   | 1.56E-05 | 0.916368 | other          | 0          |
| <i>BAI1</i>     | Caudate | 1.71E-08   | 0.000425 | 0.003779 | other          | 0          |
| <i>BAI2</i>     | Caudate | 8.33E-10   | 0.000342 | 0.022795 | other          | 0          |
| <i>BAI3</i>     | Caudate | 8.41E-07   | -0.00077 | 5.00E-09 | decreasing     | 0          |
| <i>BAIAP2L2</i> | Caudate | 4.55E-09   | 0.000804 | 7.84E-10 | increasing     | 0          |
| <i>BAIAP3</i>   | Caudate | 8.81E-09   | 0.000721 | 7.56E-08 | increasing     | 0          |
| <i>BAMBI</i>    | Caudate | 1.23E-09   | -0.00075 | 8.90E-09 | decreasing     | 0          |
| <i>BANF1</i>    | Caudate | 6.56E-09   | -0.00011 | 0.469378 | other          | 0          |
| <i>BANP</i>     | Caudate | 3.90E-07   | 0.000709 | 2.11E-07 | increasing     | 0          |
| <i>BASP1</i>    | Caudate | 2.46E-08   | -0.00073 | 4.27E-08 | decreasing     | 1          |
| <i>BAZ1B</i>    | Caudate | 5.66E-08   | 0.000653 | 7.47E-07 | increasing     | 0          |
| <i>BBIP1</i>    | Caudate | 5.01E-07   | -0.00075 | 8.57E-09 | decreasing     | 0          |
| <i>BCAP29</i>   | Caudate | 4.40E-10   | -0.00074 | 4.97E-08 | decreasing     | 0          |
| <i>BCAR1</i>    | Caudate | 5.09E-11   | 0.000453 | 0.001959 | other          | 0          |

**Supplementary Table 9. Genes with a significant age effect from either ANOVA or linear regression. Beta is the regression coefficient, Pval is the p-value for the regression coefficient of expression on age (in days). Effect category is increasing if beta is positive and significant, decreasing if beta is negative and significant, and other if the ANOVA were significant rather than the linear regression. Local eQTL is 1 if the gene had a significant local eQTL**

| Gene           | Tissue  | Anova.pval | Beta      | Pval     | EffectCategory | Local eQTL |
|----------------|---------|------------|-----------|----------|----------------|------------|
| <i>BCAT2</i>   | Caudate | 1.16E-09   | 0.000771  | 6.01E-09 | increasing     | 0          |
| <i>BCKDHA</i>  | Caudate | 1.77E-08   | 0.000414  | 0.004954 | other          | 0          |
| <i>BCL11B</i>  | Caudate | 4.00E-10   | -4.60E-05 | 0.764316 | other          | 0          |
| <i>BCL7A</i>   | Caudate | 6.52E-10   | 0.000167  | 0.268042 | other          | 0          |
| <i>BCL7C</i>   | Caudate | 9.62E-12   | 0.000641  | 3.77E-06 | increasing     | 0          |
| <i>BCLAF1</i>  | Caudate | 6.31E-09   | -0.0006   | 2.02E-05 | decreasing     | 0          |
| <i>BDP1</i>    | Caudate | 4.31E-11   | -0.00083  | 1.42E-10 | decreasing     | 0          |
| <i>BEND4</i>   | Caudate | 3.91E-14   | -0.00084  | 1.86E-11 | decreasing     | 0          |
| <i>BEST1</i>   | Caudate | 8.18E-09   | 0.000692  | 3.37E-07 | increasing     | 1          |
| <i>BHLHE40</i> | Caudate | 2.12E-09   | 0.000281  | 0.055947 | other          | 0          |
| <i>BHLHE41</i> | Caudate | 2.49E-09   | 0.00024   | 0.097475 | other          | 0          |
| <i>BHMT</i>    | Caudate | 8.92E-07   | 0.000791  | 8.37E-10 | increasing     | 0          |
| <i>BICD2</i>   | Caudate | 2.67E-08   | 0.000515  | 0.000393 | other          | 0          |
| <i>BIN1</i>    | Caudate | 3.91E-12   | 0.000732  | 3.44E-08 | increasing     | 0          |
| <i>BIN2</i>    | Caudate | 1.32E-07   | -0.00078  | 2.56E-09 | decreasing     | 0          |
| <i>BIRC2</i>   | Caudate | 7.10E-07   | -0.00073  | 4.11E-08 | decreasing     | 0          |
| <i>BIRC3</i>   | Caudate | 1.51E-11   | -0.00075  | 9.68E-09 | decreasing     | 0          |
| <i>BIVM</i>    | Caudate | 4.16E-09   | -0.00068  | 2.65E-07 | decreasing     | 0          |
| <i>BLOC1S4</i> | Caudate | 1.32E-07   | -0.00016  | 0.286445 | other          | 0          |
| <i>BLVRA</i>   | Caudate | 3.01E-11   | 0.000762  | 7.08E-09 | increasing     | 0          |
| <i>BLVRB</i>   | Caudate | 3.29E-10   | 0.000752  | 1.17E-08 | increasing     | 0          |
| <i>BMP1</i>    | Caudate | 3.31E-08   | 0.000716  | 1.20E-07 | increasing     | 0          |
| <i>BMP2K</i>   | Caudate | 7.83E-09   | -0.00056  | 7.36E-05 | decreasing     | 0          |
| <i>BMPER</i>   | Caudate | 1.05E-12   | -0.00081  | 1.87E-10 | decreasing     | 0          |
| <i>BMPR1A</i>  | Caudate | 5.84E-09   | -0.00076  | 5.18E-09 | decreasing     | 0          |
| <i>BOK</i>     | Caudate | 3.36E-12   | 0.000824  | 1.04E-10 | increasing     | 0          |
| <i>BRAF</i>    | Caudate | 2.15E-09   | -0.00046  | 0.001284 | other          | 0          |
| <i>BRAT1</i>   | Caudate | 3.35E-10   | 0.00046   | 0.001761 | other          | 0          |
| <i>BRCA2</i>   | Caudate | 4.23E-08   | -0.00042  | 0.003008 | other          | 0          |
| <i>BRD1</i>    | Caudate | 1.12E-12   | 0.000668  | 1.41E-06 | increasing     | 0          |
| <i>BRD9</i>    | Caudate | 1.16E-08   | 0.000306  | 0.038125 | other          | 1          |
| <i>BRF1</i>    | Caudate | 6.39E-12   | 0.000586  | 3.68E-05 | increasing     | 0          |
| <i>BRINP1</i>  | Caudate | 1.56E-13   | -0.00073  | 4.69E-08 | decreasing     | 0          |
| <i>BRINP3</i>  | Caudate | 2.24E-08   | -0.00068  | 6.44E-07 | decreasing     | 0          |
| <i>BRMS1L</i>  | Caudate | 3.74E-09   | -0.00078  | 3.72E-09 | decreasing     | 0          |
| <i>BROX</i>    | Caudate | 4.29E-09   | -0.00066  | 2.33E-06 | decreasing     | 0          |
| <i>BRPF1</i>   | Caudate | 2.42E-08   | 0.000359  | 0.016259 | other          | 0          |
| <i>BRSK1</i>   | Caudate | 2.04E-08   | 0.000528  | 0.000268 | other          | 0          |
| <i>BRSK2</i>   | Caudate | 2.01E-08   | 0.000515  | 0.000361 | other          | 0          |
| <i>BRWD3</i>   | Caudate | 1.56E-09   | -0.00071  | 1.86E-07 | decreasing     | 0          |



**Supplementary Table 9. Genes with a significant age effect from either ANOVA or linear regression. Beta is the regression coefficient, Pval is the p-value for the regression coefficient of expression on age (in days). Effect category is increasing if beta is positive and significant, decreasing if beta is negative and significant, and other if the ANOVA were significant rather than the linear regression. Local eQTL is 1 if the gene had a significant local eQTL**

| Gene                | Tissue  | Anova.pval | Beta     | Pval     | EffectCategory | Local eQTL |
|---------------------|---------|------------|----------|----------|----------------|------------|
| <i>BSG</i>          | Caudate | 2.73E-09   | 0.000746 | 6.78E-09 | increasing     | 0          |
| <i>BSPRY</i>        | Caudate | 1.11E-07   | 0.000582 | 2.61E-05 | increasing     | 0          |
| <i>BTBD1</i>        | Caudate | 2.86E-06   | -0.00074 | 1.81E-08 | decreasing     | 0          |
| <i>BTBD2</i>        | Caudate | 2.34E-07   | 0.000315 | 0.036438 | other          | 0          |
| <i>BTBD9</i>        | Caudate | 7.98E-14   | 0.000756 | 1.93E-09 | increasing     | 0          |
| <i>BTG3</i>         | Caudate | 1.61E-09   | -0.00059 | 1.78E-05 | decreasing     | 0          |
| <i>BTNL8</i>        | Caudate | 2.99E-14   | 0.000853 | 6.02E-12 | increasing     | 0          |
| <i>BUB1</i>         | Caudate | 1.93E-10   | -0.00075 | 6.61E-09 | decreasing     | 0          |
| <i>BUB1B</i>        | Caudate | 6.32E-08   | -0.0004  | 0.005312 | other          | 0          |
| <i>BVES</i>         | Caudate | 7.15E-09   | 0.000784 | 2.86E-09 | increasing     | 0          |
| <i>BZRAP1</i>       | Caudate | 5.78E-09   | 0.000649 | 3.56E-06 | increasing     | 0          |
| <i>BZW1</i>         | Caudate | 3.85E-06   | -0.00073 | 3.91E-08 | decreasing     | 0          |
| <i>C10H2orf69</i>   | Caudate | 3.54E-10   | -0.0004  | 0.0066   | other          | 0          |
| <i>C10H2orf72</i>   | Caudate | 6.06E-10   | 0.000607 | 1.62E-05 | increasing     | 0          |
| <i>C11H12orf10</i>  | Caudate | 1.83E-07   | 0.000148 | 0.328091 | other          | 0          |
| <i>C11H12orf5</i>   | Caudate | 3.96E-08   | -0.00059 | 3.20E-05 | decreasing     | 0          |
| <i>C12H9orf41</i>   | Caudate | 2.38E-07   | -0.00065 | 2.22E-06 | decreasing     | 0          |
| <i>C12H9orf69</i>   | Caudate | 2.32E-08   | 0.000312 | 0.038839 | other          | 0          |
| <i>C12H9orf72</i>   | Caudate | 4.37E-09   | -0.00063 | 7.10E-06 | decreasing     | 0          |
| <i>C12H9orf89</i>   | Caudate | 1.24E-10   | 0.000619 | 9.93E-06 | increasing     | 0          |
| <i>C14H2orf81</i>   | Caudate | 1.74E-09   | 0.00077  | 5.41E-09 | increasing     | 1          |
| <i>C16H17orf100</i> | Caudate | 4.17E-09   | 8.26E-06 | 0.956643 | other          | 0          |
| <i>C16H17orf59</i>  | Caudate | 2.87E-08   | 0.000329 | 0.026765 | other          | 0          |
| <i>C17H6orf141</i>  | Caudate | 2.67E-08   | 0.000119 | 0.423672 | other          | 0          |
| <i>C17H6orf62</i>   | Caudate | 3.92E-07   | -0.00076 | 5.72E-09 | decreasing     | 0          |
| <i>C19H22orf29</i>  | Caudate | 3.71E-09   | 0.00029  | 0.048697 | other          | 0          |
| <i>C1H11orf1</i>    | Caudate | 9.72E-08   | 0.000562 | 4.69E-05 | increasing     | 0          |
| <i>C1H11orf30</i>   | Caudate | 3.71E-08   | -0.00016 | 0.276219 | other          | 0          |
| <i>C1H11orf82</i>   | Caudate | 2.49E-10   | -0.00064 | 2.07E-06 | decreasing     | 0          |
| <i>C1H11orf87</i>   | Caudate | 7.35E-12   | -0.00083 | 1.35E-10 | decreasing     | 0          |
| <i>C1H11orf95</i>   | Caudate | 1.44E-10   | 0.00044  | 0.002877 | other          | 0          |
| <i>C1QB</i>         | Caudate | 1.99E-07   | 0.000325 | 0.030137 | other          | 0          |
| <i>C1QL3</i>        | Caudate | 6.36E-10   | 0.000703 | 2.20E-07 | increasing     | 0          |
| <i>C1QTNF4</i>      | Caudate | 9.20E-12   | 0.000481 | 0.001005 | other          | 0          |
| <i>C20H1orf159</i>  | Caudate | 8.46E-09   | 0.000502 | 0.000458 | other          | 0          |
| <i>C20H1orf233</i>  | Caudate | 5.38E-08   | 0.00075  | 2.32E-08 | increasing     | 0          |
| <i>C20H1orf52</i>   | Caudate | 4.10E-05   | -0.00072 | 1.10E-07 | decreasing     | 0          |
| <i>C21H7orf60</i>   | Caudate | 1.44E-06   | -0.00076 | 8.83E-09 | decreasing     | 0          |
| <i>C21H7orf73</i>   | Caudate | 4.69E-11   | -0.00056 | 9.70E-05 | decreasing     | 0          |
| <i>C23H5orf15</i>   | Caudate | 3.94E-16   | -0.00089 | 4.77E-13 | decreasing     | 0          |

**Supplementary Table 9. Genes with a significant age effect from either ANOVA or linear regression. Beta is the regression coefficient, Pval is the p-value for the regression coefficient of expression on age (in days). Effect category is increasing if beta is positive and significant, decreasing if beta is negative and significant, and other if the ANOVA were significant rather than the linear regression. Local eQTL is 1 if the gene had a significant local eQTL**

| Gene                | Tissue  | Anova.pval | Beta      | Pval     | EffectCategory | Local eQTL |
|---------------------|---------|------------|-----------|----------|----------------|------------|
| <i>C23H5orf24</i>   | Caudate | 6.52E-07   | -0.00073  | 6.46E-08 | decreasing     | 0          |
| <i>C23H5orf45</i>   | Caudate | 3.49E-10   | 0.000439  | 0.002482 | other          | 0          |
| <i>C24H14orf169</i> | Caudate | 9.41E-08   | 0.000369  | 0.012933 | other          | 0          |
| <i>C24H14orf80</i>  | Caudate | 2.76E-08   | 0.000134  | 0.376842 | other          | 1          |
| <i>C26H15orf27</i>  | Caudate | 5.49E-08   | -8.97E-05 | 0.549846 | other          | 0          |
| <i>C26H15orf41</i>  | Caudate | 6.10E-08   | -0.00073  | 4.23E-08 | decreasing     | 0          |
| <i>C26H15orf59</i>  | Caudate | 1.07E-07   | -5.04E-05 | 0.742835 | other          | 0          |
| <i>C26H15orf62</i>  | Caudate | 1.61E-07   | 0.00057   | 6.17E-05 | increasing     | 0          |
| <i>C27H4orf48</i>   | Caudate | 4.86E-08   | 0.000504  | 0.000544 | other          | 0          |
| <i>C27H4orf50</i>   | Caudate | 3.78E-05   | 0.000697  | 2.29E-07 | increasing     | 0          |
| <i>C28H7orf26</i>   | Caudate | 2.35E-11   | 0.000346  | 0.018579 | other          | 0          |
| <i>C28H7orf50</i>   | Caudate | 1.37E-09   | 0.000553  | 0.000122 | other          | 0          |
| <i>C2CD2</i>        | Caudate | 4.94E-08   | 0.000728  | 3.29E-08 | increasing     | 0          |
| <i>C2CD4C</i>       | Caudate | 2.44E-07   | 0.000552  | 9.97E-05 | increasing     | 0          |
| <i>C2CD4D</i>       | Caudate | 6.00E-07   | 0.000728  | 7.60E-08 | increasing     | 0          |
| <i>C2H20orf27</i>   | Caudate | 4.79E-12   | 0.000719  | 5.67E-08 | increasing     | 0          |
| <i>C2H21orf2</i>    | Caudate | 2.54E-08   | 0.00038   | 0.010759 | other          | 0          |
| <i>C4H5orf51</i>    | Caudate | 3.36E-10   | -0.00078  | 2.69E-09 | decreasing     | 0          |
| <i>C5H16orf52</i>   | Caudate | 1.72E-08   | -0.00076  | 1.56E-08 | decreasing     | 0          |
| <i>C5H16orf86</i>   | Caudate | 2.55E-08   | 0.000229  | 0.131071 | other          | 0          |
| <i>C5H16orf89</i>   | Caudate | 1.81E-13   | 0.000705  | 2.00E-07 | increasing     | 0          |
| <i>C6H19orf10</i>   | Caudate | 1.27E-07   | 0.000198  | 0.187065 | other          | 0          |
| <i>C6H19orf12</i>   | Caudate | 9.58E-09   | 0.000616  | 1.24E-05 | increasing     | 0          |
| <i>C6H19orf60</i>   | Caudate | 9.02E-11   | 0.000583  | 2.50E-05 | increasing     | 0          |
| <i>C6H19orf66</i>   | Caudate | 4.54E-14   | 0.000764  | 5.13E-09 | increasing     | 0          |
| <i>C6H19orf68</i>   | Caudate | 1.89E-09   | 0.000688  | 1.97E-07 | increasing     | 0          |
| <i>C8H8orf34</i>    | Caudate | 5.55E-15   | -0.00082  | 1.40E-11 | decreasing     | 0          |
| <i>C8H8orf37</i>    | Caudate | 4.21E-08   | -0.00075  | 7.15E-09 | decreasing     | 0          |
| <i>C8H8orf82</i>    | Caudate | 2.15E-09   | 0.000604  | 2.08E-05 | increasing     | 0          |
| <i>C9H10orf11</i>   | Caudate | 1.26E-14   | 0.000848  | 2.50E-12 | increasing     | 0          |
| <i>C9H10orf118</i>  | Caudate | 9.95E-10   | -0.00075  | 2.18E-08 | decreasing     | 0          |
| <i>C9H10orf35</i>   | Caudate | 3.46E-09   | 0.000703  | 2.87E-07 | increasing     | 0          |
| <i>C9H10orf62</i>   | Caudate | 7.23E-06   | 0.000724  | 2.53E-08 | increasing     | 0          |
| <i>C9H10orf90</i>   | Caudate | 3.10E-16   | 0.000848  | 1.48E-11 | increasing     | 0          |
| <i>CA10</i>         | Caudate | 8.01E-15   | -0.00087  | 4.75E-13 | decreasing     | 0          |
| <i>CA12</i>         | Caudate | 1.78E-07   | 0.000588  | 2.05E-05 | increasing     | 0          |
| <i>CA7</i>          | Caudate | 1.99E-07   | 0.000667  | 1.58E-06 | increasing     | 0          |
| <i>CA8</i>          | Caudate | 3.69E-09   | -0.00062  | 4.23E-06 | decreasing     | 1          |
| <i>CABP1</i>        | Caudate | 3.59E-17   | 0.000857  | 9.57E-12 | increasing     | 0          |
| <i>CACFD1</i>       | Caudate | 4.18E-10   | 0.000389  | 0.006171 | other          | 0          |

**Supplementary Table 9. Genes with a significant age effect from either ANOVA or linear regression. Beta is the regression coefficient, Pval is the p-value for the regression coefficient of expression on age (in days). Effect category is increasing if beta is positive and significant, decreasing if beta is negative and significant, and other if the ANOVA were significant rather than the linear regression. Local eQTL is 1 if the gene had a significant local eQTL**

| Gene            | Tissue  | Anova.pval | Beta     | Pval     | EffectCategory | Local eQTL |
|-----------------|---------|------------|----------|----------|----------------|------------|
| <i>CACNA1F</i>  | Caudate | 2.06E-07   | 0.000534 | 0.000126 | other          | 0          |
| <i>CACNA1H</i>  | Caudate | 4.33E-09   | 0.00054  | 0.000174 | other          | 0          |
| <i>CACNA2D1</i> | Caudate | 7.07E-08   | -0.00077 | 6.26E-09 | decreasing     | 0          |
| <i>CACNA2D3</i> | Caudate | 5.88E-17   | -0.00085 | 6.24E-12 | decreasing     | 0          |
| <i>CACNA2D4</i> | Caudate | 7.62E-12   | 0.000716 | 6.58E-08 | increasing     | 0          |
| <i>CACNB2</i>   | Caudate | 1.58E-09   | -0.00011 | 0.441923 | other          | 0          |
| <i>CACNB3</i>   | Caudate | 2.67E-10   | 0.000563 | 9.00E-05 | increasing     | 0          |
| <i>CACNB4</i>   | Caudate | 2.89E-08   | -0.00052 | 0.000139 | other          | 0          |
| <i>CACNG5</i>   | Caudate | 7.42E-08   | -0.00055 | 0.000104 | other          | 0          |
| <i>CACTIN</i>   | Caudate | 5.07E-10   | 0.000428 | 0.003829 | other          | 0          |
| <i>CAD</i>      | Caudate | 2.01E-11   | 0.000332 | 0.022155 | other          | 0          |
| <i>CADM2</i>    | Caudate | 1.03E-08   | -0.00073 | 7.69E-08 | decreasing     | 0          |
| <i>CADM4</i>    | Caudate | 8.39E-10   | 0.000376 | 0.011719 | other          | 0          |
| <i>CALB1</i>    | Caudate | 1.55E-07   | -0.00023 | 0.12146  | other          | 0          |
| <i>CALCOCO2</i> | Caudate | 1.36E-08   | 0.000493 | 0.000578 | other          | 0          |
| <i>CALCRL</i>   | Caudate | 4.06E-13   | -0.00088 | 2.55E-12 | decreasing     | 0          |
| <i>CALU</i>     | Caudate | 1.48E-08   | -0.00068 | 8.55E-07 | decreasing     | 0          |
| <i>CALY</i>     | Caudate | 2.41E-10   | 0.000782 | 3.30E-09 | increasing     | 0          |
| <i>CAMK2A</i>   | Caudate | 4.29E-11   | 0.000721 | 4.21E-08 | increasing     | 0          |
| <i>CAMK2D</i>   | Caudate | 1.04E-09   | -0.00074 | 1.17E-08 | decreasing     | 0          |
| <i>CAMK2N1</i>  | Caudate | 6.18E-11   | -0.00072 | 1.26E-07 | decreasing     | 0          |
| <i>CAMK4</i>    | Caudate | 3.14E-10   | -0.00081 | 5.44E-10 | decreasing     | 0          |
| <i>CAMKK1</i>   | Caudate | 2.57E-19   | 0.000837 | 1.08E-11 | increasing     | 0          |
| <i>CAMKK2</i>   | Caudate | 1.69E-08   | 0.000552 | 8.88E-05 | increasing     | 0          |
| <i>CAMKV</i>    | Caudate | 2.27E-09   | 0.000478 | 0.001102 | other          | 0          |
| <i>CAMSAP1</i>  | Caudate | 1.07E-09   | 0.000268 | 0.070404 | other          | 0          |
| <i>CAMSAP3</i>  | Caudate | 1.58E-10   | 0.000532 | 0.000198 | other          | 0          |
| <i>CAND2</i>    | Caudate | 1.65E-10   | 0.00064  | 4.64E-06 | increasing     | 0          |
| <i>CANT1</i>    | Caudate | 1.98E-11   | -0.00017 | 0.266772 | other          | 0          |
| <i>CAP2</i>     | Caudate | 2.10E-15   | -0.00035 | 0.014753 | other          | 0          |
| <i>CAPN1</i>    | Caudate | 1.24E-09   | 0.000595 | 2.70E-05 | increasing     | 0          |
| <i>CAPN10</i>   | Caudate | 1.17E-09   | 0.000355 | 0.014927 | other          | 0          |
| <i>CAPN15</i>   | Caudate | 2.65E-08   | 0.000503 | 0.000565 | other          | 0          |
| <i>CAPN2</i>    | Caudate | 7.22E-08   | 0.000721 | 8.20E-08 | increasing     | 0          |
| <i>CAPN3</i>    | Caudate | 4.15E-08   | 0.000744 | 2.42E-08 | increasing     | 1          |
| <i>CAPZB</i>    | Caudate | 1.76E-09   | -0.00053 | 0.000173 | other          | 0          |
| <i>CARNS1</i>   | Caudate | 7.40E-16   | 0.000855 | 1.21E-12 | increasing     | 0          |
| <i>CASK</i>     | Caudate | 8.38E-16   | -0.00087 | 6.38E-13 | decreasing     | 0          |
| <i>CASKIN1</i>  | Caudate | 3.59E-10   | 0.000752 | 1.91E-08 | increasing     | 0          |
| <i>CASKIN2</i>  | Caudate | 1.72E-08   | 0.000764 | 5.64E-09 | increasing     | 0          |

**Supplementary Table 9. Genes with a significant age effect from either ANOVA or linear regression. Beta is the regression coefficient, Pval is the p-value for the regression coefficient of expression on age (in days). Effect category is increasing if beta is positive and significant, decreasing if beta is negative and significant, and other if the ANOVA were significant rather than the linear regression. Local eQTL is 1 if the gene had a significant local eQTL**

| Gene           | Tissue  | Anova.pval | Beta     | Pval     | EffectCategory | Local eQTL |
|----------------|---------|------------|----------|----------|----------------|------------|
| <i>CASP3</i>   | Caudate | 1.51E-13   | -0.00079 | 1.92E-09 | decreasing     | 0          |
| <i>CASP6</i>   | Caudate | 7.68E-08   | -0.00065 | 1.63E-06 | decreasing     | 0          |
| <i>CAST</i>    | Caudate | 2.23E-10   | 0.000391 | 0.006895 | other          | 0          |
| <i>CAV2</i>    | Caudate | 8.65E-09   | -0.00074 | 5.17E-09 | decreasing     | 0          |
| <i>CBLB</i>    | Caudate | 9.31E-10   | -0.00069 | 6.43E-07 | decreasing     | 0          |
| <i>CBLL1</i>   | Caudate | 4.79E-09   | -0.00066 | 1.76E-06 | decreasing     | 0          |
| <i>CBR1</i>    | Caudate | 6.23E-13   | 0.000761 | 6.90E-09 | increasing     | 0          |
| <i>CBS</i>     | Caudate | 3.59E-09   | 0.000656 | 1.90E-06 | increasing     | 0          |
| <i>CBX2</i>    | Caudate | 2.06E-08   | -0.0006  | 9.89E-06 | decreasing     | 0          |
| <i>CBX7</i>    | Caudate | 9.33E-17   | 0.000859 | 2.92E-13 | increasing     | 0          |
| <i>CBX8</i>    | Caudate | 1.18E-11   | -0.00077 | 1.86E-09 | decreasing     | 0          |
| <i>CBY3</i>    | Caudate | 1.02E-08   | 0.000321 | 0.029967 | other          | 0          |
| <i>CC2D1A</i>  | Caudate | 1.41E-11   | 0.000756 | 1.68E-08 | increasing     | 0          |
| <i>CC2D1B</i>  | Caudate | 3.01E-09   | 0.000483 | 0.000864 | other          | 0          |
| <i>CCAR1</i>   | Caudate | 5.32E-08   | -0.00064 | 4.46E-06 | decreasing     | 0          |
| <i>CCAR2</i>   | Caudate | 1.32E-08   | 0.000449 | 0.002323 | other          | 0          |
| <i>CCBL1</i>   | Caudate | 2.09E-09   | 0.000616 | 1.17E-05 | increasing     | 1          |
| <i>CCDC104</i> | Caudate | 7.44E-08   | -0.00036 | 0.01553  | other          | 0          |
| <i>CCDC106</i> | Caudate | 3.53E-08   | 0.000193 | 0.204623 | other          | 0          |
| <i>CCDC136</i> | Caudate | 1.81E-10   | 0.000693 | 3.01E-07 | increasing     | 0          |
| <i>CCDC14</i>  | Caudate | 2.66E-08   | -0.00075 | 3.67E-09 | decreasing     | 0          |
| <i>CCDC148</i> | Caudate | 1.92E-08   | -0.00032 | 0.028248 | other          | 0          |
| <i>CCDC159</i> | Caudate | 7.00E-09   | 0.000799 | 9.90E-10 | increasing     | 0          |
| <i>CCDC173</i> | Caudate | 2.15E-07   | -0.00069 | 1.08E-07 | decreasing     | 0          |
| <i>CCDC177</i> | Caudate | 1.60E-08   | 0.00021  | 0.160477 | other          | 0          |
| <i>CCDC22</i>  | Caudate | 1.80E-08   | 0.00049  | 0.000812 | other          | 0          |
| <i>CCDC28A</i> | Caudate | 1.88E-07   | 0.000512 | 0.00033  | other          | 0          |
| <i>CCDC47</i>  | Caudate | 3.69E-12   | 0.000629 | 2.28E-06 | increasing     | 0          |
| <i>CCDC50</i>  | Caudate | 1.32E-15   | -0.00088 | 6.24E-13 | decreasing     | 0          |
| <i>CCDC61</i>  | Caudate | 1.55E-08   | 0.000579 | 4.37E-05 | increasing     | 0          |
| <i>CCDC69</i>  | Caudate | 2.59E-07   | 0.000551 | 0.000129 | other          | 0          |
| <i>CCDC78</i>  | Caudate | 2.05E-09   | 0.000689 | 5.53E-07 | increasing     | 0          |
| <i>CCDC85B</i> | Caudate | 1.09E-09   | 0.000452 | 0.00166  | other          | 0          |
| <i>CCDC85C</i> | Caudate | 2.26E-08   | 0.000311 | 0.037972 | other          | 0          |
| <i>CCDC9</i>   | Caudate | 4.15E-06   | 0.000706 | 2.56E-07 | increasing     | 0          |
| <i>CCDC90B</i> | Caudate | 1.56E-07   | -0.00075 | 1.30E-08 | decreasing     | 0          |
| <i>CCDC94</i>  | Caudate | 8.87E-08   | 0.000343 | 0.02208  | other          | 0          |
| <i>CCHCR1</i>  | Caudate | 2.40E-10   | 0.000788 | 2.35E-09 | increasing     | 0          |
| <i>CCM2</i>    | Caudate | 2.66E-09   | 0.000459 | 0.001225 | other          | 0          |
| <i>CCNC</i>    | Caudate | 1.61E-05   | -0.00074 | 4.16E-08 | decreasing     | 0          |

**Supplementary Table 9. Genes with a significant age effect from either ANOVA or linear regression. Beta is the regression coefficient, Pval is the p-value for the regression coefficient of expression on age (in days). Effect category is increasing if beta is positive and significant, decreasing if beta is negative and significant, and other if the ANOVA were significant rather than the linear regression. Local eQTL is 1 if the gene had a significant local eQTL**

| Gene            | Tissue  | Anova.pval | Beta     | Pval     | EffectCategory | Local eQTL |
|-----------------|---------|------------|----------|----------|----------------|------------|
| <i>CCND2</i>    | Caudate | 1.96E-07   | -0.00025 | 0.084501 | other          | 0          |
| <i>CCND3</i>    | Caudate | 4.55E-11   | 0.000788 | 5.65E-10 | increasing     | 0          |
| <i>CCNG2</i>    | Caudate | 1.20E-10   | -0.00079 | 1.05E-09 | decreasing     | 0          |
| <i>CCNJ</i>     | Caudate | 9.89E-09   | -0.00059 | 2.52E-05 | decreasing     | 0          |
| <i>CCP110</i>   | Caudate | 3.32E-08   | 0.000473 | 0.000965 | other          | 0          |
| <i>CCPG1</i>    | Caudate | 1.84E-08   | -0.00025 | 0.092692 | other          | 0          |
| <i>CCS</i>      | Caudate | 5.87E-08   | 0.000538 | 0.000167 | other          | 0          |
| <i>CCSER1</i>   | Caudate | 3.75E-10   | -0.00071 | 3.36E-08 | decreasing     | 0          |
| <i>CCSER2</i>   | Caudate | 9.71E-09   | -0.00049 | 0.000708 | other          | 0          |
| <i>CCT6B</i>    | Caudate | 3.95E-09   | 5.74E-05 | 0.703885 | other          | 0          |
| <i>CD151</i>    | Caudate | 7.49E-08   | 0.000427 | 0.003919 | other          | 0          |
| <i>CD177</i>    | Caudate | 1.57E-08   | 0.000228 | 0.126808 | other          | 0          |
| <i>CD22</i>     | Caudate | 1.30E-07   | 0.000739 | 1.07E-08 | increasing     | 0          |
| <i>CD276</i>    | Caudate | 1.30E-12   | 0.000849 | 1.89E-11 | increasing     | 0          |
| <i>CD2AP</i>    | Caudate | 3.85E-08   | -0.0007  | 3.12E-07 | decreasing     | 0          |
| <i>CD81</i>     | Caudate | 1.31E-07   | 0.000674 | 1.14E-06 | increasing     | 1          |
| <i>CD83</i>     | Caudate | 4.86E-09   | 0.000592 | 2.02E-05 | increasing     | 0          |
| <i>CDADC1</i>   | Caudate | 4.48E-08   | 0.000156 | 0.299589 | other          | 0          |
| <i>CDAN1</i>    | Caudate | 2.14E-11   | 0.000753 | 1.85E-08 | increasing     | 0          |
| <i>CDC14A</i>   | Caudate | 2.03E-08   | -0.00073 | 1.39E-08 | decreasing     | 0          |
| <i>CDC14B</i>   | Caudate | 5.05E-08   | 0.00037  | 0.011506 | other          | 0          |
| <i>CDC42</i>    | Caudate | 4.52E-13   | -0.00082 | 2.18E-10 | decreasing     | 0          |
| <i>CDC42EP1</i> | Caudate | 3.35E-14   | 0.000826 | 2.95E-11 | increasing     | 0          |
| <i>CDC42EP2</i> | Caudate | 3.78E-12   | 0.000795 | 2.30E-10 | increasing     | 0          |
| <i>CDC73</i>    | Caudate | 2.01E-09   | -0.00065 | 3.59E-06 | decreasing     | 0          |
| <i>CDH11</i>    | Caudate | 1.33E-08   | -0.00069 | 5.68E-07 | decreasing     | 0          |
| <i>CDH13</i>    | Caudate | 1.10E-15   | -0.00087 | 7.82E-13 | decreasing     | 0          |
| <i>CDH20</i>    | Caudate | 1.56E-11   | 0.000759 | 6.03E-09 | increasing     | 0          |
| <i>CDH22</i>    | Caudate | 4.38E-10   | 0.000415 | 0.005186 | other          | 0          |
| <i>CDH24</i>    | Caudate | 7.25E-09   | 0.000406 | 0.005321 | other          | 0          |
| <i>CDH4</i>     | Caudate | 4.54E-06   | 0.000729 | 6.91E-08 | increasing     | 0          |
| <i>CDHR5</i>    | Caudate | 2.07E-06   | 0.000744 | 3.12E-08 | increasing     | 0          |
| <i>CDK1</i>     | Caudate | 1.84E-07   | -0.00054 | 9.96E-05 | decreasing     | 0          |
| <i>CDK10</i>    | Caudate | 7.85E-09   | 0.000393 | 0.006223 | other          | 0          |
| <i>CDK11B</i>   | Caudate | 5.50E-06   | 0.000708 | 1.60E-07 | increasing     | 0          |
| <i>CDK18</i>    | Caudate | 4.58E-07   | 0.000723 | 3.64E-08 | increasing     | 0          |
| <i>CDK5R1</i>   | Caudate | 1.00E-09   | -0.00054 | 0.0001   | other          | 0          |
| <i>CDK5RAP3</i> | Caudate | 1.44E-09   | 0.000783 | 3.33E-09 | increasing     | 0          |
| <i>CDK9</i>     | Caudate | 4.80E-08   | 0.000352 | 0.013596 | other          | 0          |
| <i>CDKN1C</i>   | Caudate | 4.43E-10   | 0.000628 | 6.08E-06 | increasing     | 0          |

**Supplementary Table 9. Genes with a significant age effect from either ANOVA or linear regression. Beta is the regression coefficient, Pval is the p-value for the regression coefficient of expression on age (in days). Effect category is increasing if beta is positive and significant, decreasing if beta is negative and significant, and other if the ANOVA were significant rather than the linear regression. Local eQTL is 1 if the gene had a significant local eQTL**

| Gene              | Tissue  | Anova.pval | Beta      | Pval     | EffectCategory | Local eQTL |
|-------------------|---------|------------|-----------|----------|----------------|------------|
| <i>CDKN2AIPNL</i> | Caudate | 1.02E-07   | -0.00056  | 6.92E-05 | decreasing     | 0          |
| <i>CDKN2D</i>     | Caudate | 7.07E-11   | -6.26E-05 | 0.669728 | other          | 0          |
| <i>CDR2</i>       | Caudate | 6.78E-10   | 0.000634  | 3.60E-06 | increasing     | 0          |
| <i>CDS1</i>       | Caudate | 2.31E-09   | -0.00029  | 0.05619  | other          | 0          |
| <i>CDT1</i>       | Caudate | 5.14E-08   | 0.000113  | 0.447498 | other          | 0          |
| <i>CDYL</i>       | Caudate | 1.36E-15   | 0.000765  | 2.80E-09 | increasing     | 0          |
| <i>CEBPA</i>      | Caudate | 1.39E-14   | 0.000735  | 2.58E-08 | increasing     | 0          |
| <i>CEBPB</i>      | Caudate | 9.14E-12   | 0.000705  | 2.36E-07 | increasing     | 0          |
| <i>CELF6</i>      | Caudate | 7.45E-09   | 0.00067   | 3.21E-07 | increasing     | 0          |
| <i>CELSR2</i>     | Caudate | 2.04E-08   | 0.000427  | 0.0039   | other          | 0          |
| <i>CELSR3</i>     | Caudate | 1.89E-09   | 0.00056   | 9.22E-05 | increasing     | 0          |
| <i>CEMP1</i>      | Caudate | 3.33E-11   | 0.00038   | 0.00921  | other          | 0          |
| <i>CENPB</i>      | Caudate | 3.02E-10   | 0.000196  | 0.191765 | other          | 0          |
| <i>CENPF</i>      | Caudate | 1.19E-08   | -0.00053  | 0.00022  | other          | 0          |
| <i>CENPK</i>      | Caudate | 1.83E-09   | -0.00076  | 3.57E-09 | decreasing     | 0          |
| <i>CENPV</i>      | Caudate | 9.38E-09   | 1.33E-05  | 0.928903 | other          | 0          |
| <i>CEP131</i>     | Caudate | 1.90E-11   | 0.00072   | 5.40E-08 | increasing     | 0          |
| <i>CEP135</i>     | Caudate | 1.59E-07   | -0.00063  | 2.17E-06 | decreasing     | 0          |
| <i>CEP162</i>     | Caudate | 1.45E-07   | -0.00062  | 9.81E-06 | decreasing     | 0          |
| <i>CEP164</i>     | Caudate | 2.07E-08   | 0.000355  | 0.01291  | other          | 0          |
| <i>CEP170</i>     | Caudate | 6.30E-17   | -0.00079  | 4.79E-10 | decreasing     | 0          |
| <i>CEP170B</i>    | Caudate | 8.68E-11   | 0.000751  | 1.73E-08 | increasing     | 0          |
| <i>CEP250</i>     | Caudate | 1.54E-10   | 0.000621  | 9.23E-06 | increasing     | 0          |
| <i>CEP290</i>     | Caudate | 4.03E-09   | -0.00067  | 4.87E-07 | decreasing     | 0          |
| <i>CEP85</i>      | Caudate | 1.23E-10   | 0.000836  | 8.02E-11 | increasing     | 0          |
| <i>CEP85L</i>     | Caudate | 6.11E-17   | -0.0009   | 5.73E-14 | decreasing     | 0          |
| <i>CERCAM</i>     | Caudate | 4.75E-11   | 0.00075   | 2.17E-08 | increasing     | 0          |
| <i>CERK</i>       | Caudate | 2.10E-07   | 0.000155  | 0.30397  | other          | 0          |
| <i>CETN3</i>      | Caudate | 1.20E-07   | -0.00044  | 0.002857 | other          | 0          |
| <i>CETP</i>       | Caudate | 5.12E-10   | -0.00082  | 1.44E-10 | decreasing     | 0          |
| <i>CFD</i>        | Caudate | 2.04E-08   | 0.000467  | 0.000987 | other          | 0          |
| <i>CFL1</i>       | Caudate | 2.54E-07   | -1.22E-05 | 0.936052 | other          | 0          |
| <i>CGGBP1</i>     | Caudate | 6.76E-11   | -0.00072  | 1.19E-07 | decreasing     | 0          |
| <i>CHADL</i>      | Caudate | 6.26E-11   | 0.000501  | 0.00054  | other          | 0          |
| <i>CHCHD6</i>     | Caudate | 3.88E-08   | 0.000446  | 0.002383 | other          | 0          |
| <i>CHD1</i>       | Caudate | 1.65E-10   | -0.00076  | 9.44E-09 | decreasing     | 0          |
| <i>CHD3</i>       | Caudate | 9.54E-08   | -0.00021  | 0.165451 | other          | 0          |
| <i>CHD4</i>       | Caudate | 4.71E-10   | 0.000581  | 4.68E-05 | increasing     | 0          |
| <i>CHD5</i>       | Caudate | 1.55E-09   | 0.000227  | 0.129048 | other          | 0          |
| <i>CHD6</i>       | Caudate | 7.06E-06   | 0.000727  | 4.95E-08 | increasing     | 0          |

**Supplementary Table 9. Genes with a significant age effect from either ANOVA or linear regression. Beta is the regression coefficient, Pval is the p-value for the regression coefficient of expression on age (in days). Effect category is increasing if beta is positive and significant, decreasing if beta is negative and significant, and other if the ANOVA were significant rather than the linear regression. Local eQTL is 1 if the gene had a significant local eQTL**

| Gene           | Tissue  | Anova.pval | Beta      | Pval     | EffectCategory | Local eQTL |
|----------------|---------|------------|-----------|----------|----------------|------------|
| <i>CHD9</i>    | Caudate | 3.23E-10   | -0.00052  | 0.000373 | other          | 0          |
| <i>CHDH</i>    | Caudate | 1.39E-09   | 0.000778  | 2.04E-09 | increasing     | 0          |
| <i>CHFR</i>    | Caudate | 6.20E-09   | 0.00049   | 0.000759 | other          | 0          |
| <i>CHGA</i>    | Caudate | 4.73E-10   | -0.00076  | 2.62E-09 | decreasing     | 0          |
| <i>CHI3L1</i>  | Caudate | 3.51E-10   | 0.000544  | 0.000132 | other          | 0          |
| <i>CHIC1</i>   | Caudate | 1.50E-09   | -0.00041  | 0.004948 | other          | 0          |
| <i>CHIC2</i>   | Caudate | 5.86E-08   | -0.00074  | 1.55E-08 | decreasing     | 0          |
| <i>CHL1</i>    | Caudate | 1.25E-08   | -0.00056  | 5.25E-05 | decreasing     | 1          |
| <i>CHML</i>    | Caudate | 4.61E-10   | -0.00065  | 2.33E-06 | decreasing     | 0          |
| <i>CHMP1A</i>  | Caudate | 9.09E-08   | 0.000128  | 0.399325 | other          | 0          |
| <i>CHMP4B</i>  | Caudate | 3.51E-11   | 3.72E-05  | 0.799949 | other          | 0          |
| <i>CHMP7</i>   | Caudate | 1.67E-07   | -3.11E-05 | 0.836213 | other          | 0          |
| <i>CHORDC1</i> | Caudate | 5.32E-10   | -0.0004   | 0.006499 | other          | 0          |
| <i>CHP1</i>    | Caudate | 4.29E-09   | -0.00024  | 0.097419 | other          | 0          |
| <i>CHPF2</i>   | Caudate | 1.11E-07   | 0.000352  | 0.018233 | other          | 0          |
| <i>CHRD</i>    | Caudate | 2.06E-10   | 0.000816  | 2.64E-10 | increasing     | 0          |
| <i>CHRD1</i>   | Caudate | 3.49E-08   | -0.00061  | 6.10E-06 | decreasing     | 0          |
| <i>CHRM2</i>   | Caudate | 2.31E-10   | -0.00078  | 3.50E-09 | decreasing     | 0          |
| <i>CHST10</i>  | Caudate | 2.44E-08   | 0.000619  | 1.14E-05 | increasing     | 0          |
| <i>CHST2</i>   | Caudate | 1.21E-07   | -5.17E-05 | 0.727765 | other          | 0          |
| <i>CHST7</i>   | Caudate | 6.81E-12   | 7.05E-05  | 0.637132 | other          | 0          |
| <i>CHTF18</i>  | Caudate | 1.70E-07   | 0.000592  | 2.88E-05 | increasing     | 0          |
| <i>CIR1</i>    | Caudate | 3.16E-08   | -0.00032  | 0.029547 | other          | 0          |
| <i>CISD3</i>   | Caudate | 2.13E-11   | 0.000659  | 1.05E-06 | increasing     | 0          |
| <i>CIT</i>     | Caudate | 1.89E-08   | 0.000721  | 3.01E-08 | increasing     | 0          |
| <i>CKAP2</i>   | Caudate | 7.73E-08   | -0.00073  | 3.87E-08 | decreasing     | 1          |
| <i>CKAP4</i>   | Caudate | 1.07E-08   | -0.00048  | 0.000641 | other          | 0          |
| <i>CKB</i>     | Caudate | 1.67E-09   | 0.000487  | 0.000552 | other          | 0          |
| <i>CKMT1B</i>  | Caudate | 3.97E-09   | 0.000212  | 0.1568   | other          | 0          |
| <i>CLASRP</i>  | Caudate | 6.73E-08   | 0.000703  | 2.83E-07 | increasing     | 0          |
| <i>CLCN2</i>   | Caudate | 3.01E-08   | 0.000733  | 5.60E-08 | increasing     | 0          |
| <i>CLCN7</i>   | Caudate | 1.12E-11   | 0.000253  | 0.085048 | other          | 0          |
| <i>CLDND1</i>  | Caudate | 1.36E-12   | 0.00079   | 6.43E-10 | increasing     | 0          |
| <i>CLEC18C</i> | Caudate | 8.79E-08   | 0.000654  | 2.20E-06 | increasing     | 0          |
| <i>CLIP2</i>   | Caudate | 8.74E-15   | 0.000784  | 2.93E-09 | increasing     | 0          |
| <i>CLMN</i>    | Caudate | 8.30E-08   | 0.000549  | 0.000118 | other          | 0          |
| <i>CLOCK</i>   | Caudate | 7.54E-11   | -0.00078  | 4.45E-09 | decreasing     | 0          |
| <i>CLPB</i>    | Caudate | 4.56E-09   | -3.89E-05 | 0.798648 | other          | 0          |
| <i>CLPP</i>    | Caudate | 1.63E-07   | 0.000296  | 0.048256 | other          | 0          |
| <i>CLPX</i>    | Caudate | 3.43E-09   | -0.00077  | 3.34E-09 | decreasing     | 0          |

**Supplementary Table 9. Genes with a significant age effect from either ANOVA or linear regression. Beta is the regression coefficient, Pval is the p-value for the regression coefficient of expression on age (in days). Effect category is increasing if beta is positive and significant, decreasing if beta is negative and significant, and other if the ANOVA were significant rather than the linear regression. Local eQTL is 1 if the gene had a significant local eQTL**

| Gene            | Tissue  | Anova.pval | Beta      | Pval     | EffectCategory | Local eQTL |
|-----------------|---------|------------|-----------|----------|----------------|------------|
| <i>CLRN2</i>    | Caudate | 5.84E-07   | 0.000686  | 1.82E-07 | increasing     | 1          |
| <i>CLUH</i>     | Caudate | 7.66E-12   | 0.000493  | 0.000738 | other          | 0          |
| <i>CLVS1</i>    | Caudate | 6.58E-08   | -0.00055  | 7.05E-05 | decreasing     | 0          |
| <i>CMPK1</i>    | Caudate | 1.26E-12   | -0.00085  | 2.11E-12 | decreasing     | 0          |
| <i>CMTM2</i>    | Caudate | 9.52E-09   | 0.000719  | 7.14E-08 | increasing     | 0          |
| <i>CMTM7</i>    | Caudate | 1.15E-07   | -0.00053  | 0.000149 | other          | 0          |
| <i>CMTR1</i>    | Caudate | 8.71E-12   | 0.000279  | 0.05605  | other          | 0          |
| <i>CNDP1</i>    | Caudate | 2.30E-19   | 0.000865  | 8.39E-13 | increasing     | 0          |
| <i>CNDP2</i>    | Caudate | 5.89E-06   | 0.000699  | 2.07E-07 | increasing     | 1          |
| <i>CNIH1</i>    | Caudate | 2.24E-07   | -0.00071  | 1.80E-07 | decreasing     | 0          |
| <i>CNOT6L</i>   | Caudate | 5.82E-08   | -0.00072  | 1.24E-07 | decreasing     | 0          |
| <i>CNPPD1</i>   | Caudate | 1.22E-07   | 0.000426  | 0.003844 | other          | 0          |
| <i>CNPY3</i>    | Caudate | 1.74E-07   | 0.000191  | 0.197274 | other          | 0          |
| <i>CNTN2</i>    | Caudate | 1.68E-15   | 0.000849  | 3.97E-12 | increasing     | 0          |
| <i>CNTN3</i>    | Caudate | 7.44E-11   | -0.0008   | 1.17E-09 | decreasing     | 0          |
| <i>CNTN4</i>    | Caudate | 2.33E-10   | -0.00083  | 1.12E-10 | decreasing     | 0          |
| <i>CNTN5</i>    | Caudate | 1.59E-12   | -0.00079  | 1.35E-10 | decreasing     | 0          |
| <i>CNTN6</i>    | Caudate | 3.33E-15   | -0.00085  | 6.69E-12 | decreasing     | 0          |
| <i>CNTROB</i>   | Caudate | 7.35E-08   | 0.000489  | 0.000515 | other          | 0          |
| <i>COBL</i>     | Caudate | 2.64E-08   | 0.000602  | 1.47E-05 | increasing     | 0          |
| <i>COCH</i>     | Caudate | 5.23E-10   | 0.000573  | 3.60E-05 | increasing     | 0          |
| <i>COG4</i>     | Caudate | 1.62E-08   | 7.89E-05  | 0.601369 | other          | 0          |
| <i>COG8</i>     | Caudate | 2.43E-10   | 0.000467  | 0.001475 | other          | 0          |
| <i>COL13A1</i>  | Caudate | 1.72E-09   | 0.00064   | 2.47E-06 | increasing     | 0          |
| <i>COL18A1</i>  | Caudate | 1.86E-08   | -0.00019  | 0.215679 | other          | 0          |
| <i>COL1A2</i>   | Caudate | 7.81E-14   | -0.00065  | 2.43E-06 | decreasing     | 0          |
| <i>COL3A1</i>   | Caudate | 4.33E-13   | -0.00078  | 1.32E-09 | decreasing     | 0          |
| <i>COL4A1</i>   | Caudate | 4.02E-11   | -0.00065  | 2.23E-06 | decreasing     | 0          |
| <i>COL4A2</i>   | Caudate | 6.83E-12   | -8.81E-05 | 0.558443 | other          | 0          |
| <i>COL4A3BP</i> | Caudate | 1.13E-07   | -0.00065  | 3.03E-06 | decreasing     | 0          |
| <i>COL6A1</i>   | Caudate | 3.78E-11   | -0.00023  | 0.120029 | other          | 0          |
| <i>COL6A2</i>   | Caudate | 1.43E-09   | -0.00034  | 0.022375 | other          | 0          |
| <i>COL6A5</i>   | Caudate | 5.40E-08   | -0.00064  | 2.42E-06 | decreasing     | 1          |
| <i>COMMD2</i>   | Caudate | 1.64E-10   | -0.00079  | 2.24E-10 | decreasing     | 0          |
| <i>COMT</i>     | Caudate | 5.11E-11   | 0.000663  | 1.46E-06 | increasing     | 0          |
| <i>COMTD1</i>   | Caudate | 4.06E-08   | 0.000434  | 0.002886 | other          | 0          |
| <i>COPS2</i>    | Caudate | 7.80E-10   | -0.00062  | 9.51E-06 | decreasing     | 0          |
| <i>COPS8</i>    | Caudate | 1.84E-15   | -0.00064  | 3.98E-06 | decreasing     | 0          |
| <i>COQ4</i>     | Caudate | 1.77E-10   | 0.000582  | 2.28E-05 | increasing     | 0          |
| <i>CORO1B</i>   | Caudate | 2.55E-11   | 0.000423  | 0.004248 | other          | 0          |



**Supplementary Table 9. Genes with a significant age effect from either ANOVA or linear regression. Beta is the regression coefficient, Pval is the p-value for the regression coefficient of expression on age (in days). Effect category is increasing if beta is positive and significant, decreasing if beta is negative and significant, and other if the ANOVA were significant rather than the linear regression. Local eQTL is 1 if the gene had a significant local eQTL**

| Gene            | Tissue  | Anova.pval | Beta     | Pval     | EffectCategory | Local eQTL |
|-----------------|---------|------------|----------|----------|----------------|------------|
| <i>CORO2A</i>   | Caudate | 1.90E-07   | -0.00027 | 0.072758 | other          | 0          |
| <i>CORO2B</i>   | Caudate | 1.76E-07   | 0.000585 | 2.01E-05 | increasing     | 0          |
| <i>CORO6</i>    | Caudate | 5.54E-11   | 0.000819 | 2.57E-10 | increasing     | 0          |
| <i>CORO7</i>    | Caudate | 2.50E-10   | 0.000593 | 2.71E-05 | increasing     | 0          |
| <i>CPA3</i>     | Caudate | 2.46E-08   | 0.000795 | 1.37E-09 | increasing     | 0          |
| <i>CPB1</i>     | Caudate | 2.18E-23   | 0.000907 | 8.51E-15 | increasing     | 0          |
| <i>CPEB1</i>    | Caudate | 2.03E-25   | 0.000917 | 2.25E-15 | increasing     | 0          |
| <i>CPNE6</i>    | Caudate | 5.00E-08   | -0.00027 | 0.07121  | other          | 0          |
| <i>CPQ</i>      | Caudate | 9.75E-08   | 0.000689 | 3.75E-07 | increasing     | 0          |
| <i>CPS1</i>     | Caudate | 7.40E-08   | 0.000742 | 3.41E-08 | increasing     | 0          |
| <i>CPSF1</i>    | Caudate | 2.10E-11   | 0.000608 | 1.43E-05 | increasing     | 0          |
| <i>CPSF3L</i>   | Caudate | 7.96E-10   | 0.000333 | 0.022605 | other          | 0          |
| <i>CPSF4</i>    | Caudate | 1.87E-10   | 0.000549 | 0.00013  | other          | 0          |
| <i>CPT1A</i>    | Caudate | 2.03E-07   | -0.00017 | 0.275093 | other          | 0          |
| <i>CPT1C</i>    | Caudate | 4.30E-09   | 0.00045  | 0.002185 | other          | 0          |
| <i>CRAT</i>     | Caudate | 2.21E-09   | 0.000532 | 0.000206 | other          | 0          |
| <i>CRB2</i>     | Caudate | 1.59E-10   | 0.000821 | 1.96E-10 | increasing     | 0          |
| <i>CRB3</i>     | Caudate | 3.22E-10   | 0.000744 | 7.50E-09 | increasing     | 0          |
| <i>CREB1</i>    | Caudate | 3.29E-10   | -0.00075 | 1.90E-08 | decreasing     | 0          |
| <i>CREM</i>     | Caudate | 5.22E-09   | -0.00081 | 3.23E-10 | decreasing     | 0          |
| <i>CRIP2</i>    | Caudate | 1.99E-10   | 0.000113 | 0.447089 | other          | 0          |
| <i>CRISPLD1</i> | Caudate | 4.75E-11   | -0.00065 | 9.32E-07 | decreasing     | 0          |
| <i>CRTAC1</i>   | Caudate | 1.32E-07   | 5.58E-05 | 0.712075 | other          | 0          |
| <i>CRYAB</i>    | Caudate | 3.32E-14   | 0.000456 | 0.001414 | other          | 0          |
| <i>CRYBB1</i>   | Caudate | 2.37E-07   | -0.0007  | 2.47E-07 | decreasing     | 0          |
| <i>CRYL1</i>    | Caudate | 2.82E-11   | 0.000819 | 1.39E-10 | increasing     | 0          |
| <i>CRYZL1</i>   | Caudate | 1.60E-11   | -0.00042 | 0.003941 | other          | 0          |
| <i>CSK</i>      | Caudate | 1.09E-10   | 0.000148 | 0.310466 | other          | 0          |
| <i>CSMD3</i>    | Caudate | 3.96E-08   | -0.00074 | 2.22E-08 | decreasing     | 0          |
| <i>CSNK1G2</i>  | Caudate | 4.42E-08   | 0.000425 | 0.004119 | other          | 0          |
| <i>CSNK1G3</i>  | Caudate | 5.92E-07   | -0.00071 | 1.69E-07 | decreasing     | 0          |
| <i>CSNK2A1</i>  | Caudate | 5.26E-08   | -0.00071 | 1.48E-07 | decreasing     | 0          |
| <i>CSPP1</i>    | Caudate | 1.06E-12   | 8.39E-05 | 0.583555 | other          | 0          |
| <i>CSRNP3</i>   | Caudate | 2.48E-10   | -0.00082 | 1.70E-10 | decreasing     | 0          |
| <i>CSRP1</i>    | Caudate | 2.29E-10   | 0.000638 | 2.15E-06 | increasing     | 0          |
| <i>CST6</i>     | Caudate | 2.18E-08   | 0.000741 | 2.41E-08 | increasing     | 0          |
| <i>CSTB</i>     | Caudate | 1.44E-08   | 9.39E-05 | 0.532831 | other          | 0          |
| <i>CSTF3</i>    | Caudate | 6.25E-09   | -0.00072 | 1.35E-07 | decreasing     | 0          |
| <i>CTBP1</i>    | Caudate | 2.02E-09   | 0.00044  | 0.002847 | other          | 0          |
| <i>CTDP1</i>    | Caudate | 2.67E-09   | 0.000571 | 6.44E-05 | increasing     | 0          |

**Supplementary Table 9. Genes with a significant age effect from either ANOVA or linear regression. Beta is the regression coefficient, Pval is the p-value for the regression coefficient of expression on age (in days). Effect category is increasing if beta is positive and significant, decreasing if beta is negative and significant, and other if the ANOVA were significant rather than the linear regression. Local eQTL is 1 if the gene had a significant local eQTL**

| Gene             | Tissue  | Anova.pval | Beta     | Pval     | EffectCategory | Local eQTL |
|------------------|---------|------------|----------|----------|----------------|------------|
| <i>CTDSPL2</i>   | Caudate | 4.68E-08   | -0.00067 | 7.42E-07 | decreasing     | 0          |
| <i>CTHRC1</i>    | Caudate | 2.48E-07   | -0.00058 | 1.55E-05 | decreasing     | 0          |
| <i>CTNNA1</i>    | Caudate | 1.90E-08   | 0.000506 | 0.000426 | other          | 0          |
| <i>CTNNA2</i>    | Caudate | 5.63E-08   | -0.0006  | 8.07E-06 | decreasing     | 0          |
| <i>CTNNA3</i>    | Caudate | 1.47E-18   | 0.000873 | 6.09E-14 | increasing     | 0          |
| <i>CTNNBIP1</i>  | Caudate | 4.56E-12   | -0.00016 | 0.286034 | other          | 0          |
| <i>CTSD</i>      | Caudate | 1.73E-07   | 0.00071  | 1.14E-07 | increasing     | 0          |
| <i>CTSF</i>      | Caudate | 1.45E-09   | 0.000653 | 2.85E-06 | increasing     | 0          |
| <i>CTTN</i>      | Caudate | 9.67E-09   | 0.000657 | 2.01E-06 | increasing     | 0          |
| <i>CTTNBP2</i>   | Caudate | 4.78E-08   | -0.00017 | 0.234035 | other          | 0          |
| <i>CTTNBP2NL</i> | Caudate | 5.22E-11   | -0.00066 | 1.80E-06 | decreasing     | 0          |
| <i>CTU1</i>      | Caudate | 4.62E-11   | 3.19E-05 | 0.829742 | other          | 0          |
| <i>CTXN1</i>     | Caudate | 8.11E-08   | 0.000596 | 1.30E-05 | increasing     | 0          |
| <i>CUL7</i>      | Caudate | 6.76E-10   | 0.000507 | 0.000447 | other          | 0          |
| <i>CUL9</i>      | Caudate | 3.50E-09   | 0.000809 | 5.57E-10 | increasing     | 0          |
| <i>CWC22</i>     | Caudate | 2.19E-09   | -0.00037 | 0.011143 | other          | 0          |
| <i>CX3CL1</i>    | Caudate | 2.18E-07   | -0.00064 | 5.67E-06 | decreasing     | 0          |
| <i>CXADR</i>     | Caudate | 1.07E-18   | -0.00085 | 3.68E-12 | decreasing     | 0          |
| <i>CXCL14</i>    | Caudate | 2.17E-11   | -0.0007  | 1.10E-07 | decreasing     | 0          |
| <i>CXXC4</i>     | Caudate | 5.66E-08   | -0.00039 | 0.007949 | other          | 0          |
| <i>CYFIP2</i>    | Caudate | 5.90E-08   | 0.000609 | 5.52E-06 | increasing     | 0          |
| <i>CYLD</i>      | Caudate | 1.75E-08   | -0.00057 | 5.09E-05 | decreasing     | 0          |
| <i>CYSLTR1</i>   | Caudate | 1.83E-07   | -0.00077 | 8.13E-09 | decreasing     | 0          |
| <i>D2HGDH</i>    | Caudate | 6.79E-09   | 0.000505 | 0.000458 | other          | 1          |
| <i>DAAM1</i>     | Caudate | 1.40E-17   | -0.00084 | 3.42E-12 | decreasing     | 0          |
| <i>DAAM2</i>     | Caudate | 5.85E-09   | 0.00069  | 2.18E-07 | increasing     | 1          |
| <i>DAB1</i>      | Caudate | 2.05E-09   | -0.0008  | 1.50E-09 | decreasing     | 1          |
| <i>DAB2</i>      | Caudate | 1.69E-11   | -0.0008  | 8.24E-10 | decreasing     | 0          |
| <i>DACH1</i>     | Caudate | 5.96E-15   | -0.00085 | 1.56E-11 | decreasing     | 0          |
| <i>DACT1</i>     | Caudate | 3.39E-09   | -0.00056 | 6.96E-05 | decreasing     | 1          |
| <i>DACT2</i>     | Caudate | 1.87E-09   | 0.000668 | 1.06E-06 | increasing     | 0          |
| <i>DACT3</i>     | Caudate | 1.73E-10   | 0.00031  | 0.036638 | other          | 0          |
| <i>DAGLB</i>     | Caudate | 3.45E-08   | 0.000646 | 4.06E-06 | increasing     | 0          |
| <i>DALRD3</i>    | Caudate | 1.11E-07   | 0.000397 | 0.005731 | other          | 0          |
| <i>DAPK2</i>     | Caudate | 3.37E-07   | 0.000728 | 3.80E-08 | increasing     | 0          |
| <i>DAZAP1</i>    | Caudate | 3.00E-10   | 0.000721 | 1.16E-07 | increasing     | 0          |
| <i>DAZAP2</i>    | Caudate | 4.75E-11   | -0.00027 | 0.063242 | other          | 0          |
| <i>DBNDD1</i>    | Caudate | 3.01E-08   | 0.000668 | 6.71E-07 | increasing     | 1          |
| <i>DBNDD2</i>    | Caudate | 5.54E-08   | 0.000197 | 0.182302 | other          | 0          |
| <i>DBNL</i>      | Caudate | 4.61E-11   | 0.000469 | 0.001399 | other          | 0          |

**Supplementary Table 9. Genes with a significant age effect from either ANOVA or linear regression. Beta is the regression coefficient, Pval is the p-value for the regression coefficient of expression on age (in days). Effect category is increasing if beta is positive and significant, decreasing if beta is negative and significant, and other if the ANOVA were significant rather than the linear regression. Local eQTL is 1 if the gene had a significant local eQTL**

| Gene           | Tissue  | Anova.pval | Beta      | Pval     | EffectCategory | Local eQTL |
|----------------|---------|------------|-----------|----------|----------------|------------|
| <i>DBT</i>     | Caudate | 1.46E-10   | -0.00078  | 3.55E-09 | decreasing     | 0          |
| <i>DCAF12</i>  | Caudate | 2.38E-10   | -0.00055  | 0.00012  | other          | 0          |
| <i>DCAF15</i>  | Caudate | 5.84E-09   | 0.000237  | 0.101568 | other          | 0          |
| <i>DCBLD1</i>  | Caudate | 6.56E-09   | -0.00063  | 2.01E-06 | decreasing     | 0          |
| <i>DCHS1</i>   | Caudate | 2.19E-10   | 0.00019   | 0.202114 | other          | 0          |
| <i>DCK</i>     | Caudate | 2.44E-08   | -0.00074  | 4.82E-08 | decreasing     | 0          |
| <i>DCLK1</i>   | Caudate | 3.54E-23   | -0.00093  | 8.80E-15 | decreasing     | 0          |
| <i>DCP1B</i>   | Caudate | 2.25E-10   | -0.00026  | 0.082636 | other          | 0          |
| <i>DCPS</i>    | Caudate | 2.59E-08   | 0.000206  | 0.168905 | other          | 1          |
| <i>DCST1</i>   | Caudate | 1.55E-08   | 0.000703  | 2.21E-07 | increasing     | 0          |
| <i>DCUN1D1</i> | Caudate | 2.90E-09   | -0.00073  | 5.51E-08 | decreasing     | 0          |
| <i>DCUN1D4</i> | Caudate | 2.24E-08   | -0.00065  | 2.65E-06 | decreasing     | 0          |
| <i>DCX</i>     | Caudate | 5.16E-10   | -0.00073  | 3.31E-08 | decreasing     | 0          |
| <i>DDIT4L</i>  | Caudate | 2.18E-10   | 7.41E-05  | 0.621838 | other          | 0          |
| <i>DDR1</i>    | Caudate | 3.88E-11   | 0.000412  | 0.003598 | other          | 0          |
| <i>DDRGK1</i>  | Caudate | 3.10E-11   | 0.000629  | 5.21E-06 | increasing     | 0          |
| <i>DDX1</i>    | Caudate | 3.48E-09   | -0.00059  | 3.05E-05 | decreasing     | 0          |
| <i>DDX21</i>   | Caudate | 3.07E-11   | -0.0008   | 1.83E-10 | decreasing     | 0          |
| <i>DDX24</i>   | Caudate | 2.79E-08   | 0.00038   | 0.008326 | other          | 0          |
| <i>DDX39A</i>  | Caudate | 3.28E-10   | 0.000169  | 0.257261 | other          | 0          |
| <i>DDX41</i>   | Caudate | 1.82E-09   | 0.000449  | 0.00214  | other          | 0          |
| <i>DDX42</i>   | Caudate | 1.81E-07   | 0.000176  | 0.234015 | other          | 0          |
| <i>DDX49</i>   | Caudate | 3.62E-08   | -3.94E-05 | 0.791066 | other          | 0          |
| <i>DDX51</i>   | Caudate | 3.96E-11   | 0.000523  | 0.000256 | other          | 0          |
| <i>DDX53</i>   | Caudate | 1.08E-08   | -0.00075  | 2.91E-08 | decreasing     | 0          |
| <i>DDX56</i>   | Caudate | 2.97E-09   | 0.000389  | 0.007948 | other          | 0          |
| <i>DEAF1</i>   | Caudate | 8.24E-09   | 0.000389  | 0.00825  | other          | 0          |
| <i>DECR2</i>   | Caudate | 8.63E-08   | 0.000545  | 0.000155 | other          | 0          |
| <i>DEDD2</i>   | Caudate | 5.85E-08   | 0.000676  | 6.31E-07 | increasing     | 0          |
| <i>DEF8</i>    | Caudate | 1.36E-08   | 0.000437  | 0.002909 | other          | 0          |
| <i>DEGS2</i>   | Caudate | 2.53E-12   | 0.000816  | 6.52E-11 | increasing     | 0          |
| <i>DENND1B</i> | Caudate | 6.78E-08   | -0.00037  | 0.010528 | other          | 0          |
| <i>DENND4A</i> | Caudate | 3.68E-11   | -0.00071  | 1.95E-07 | decreasing     | 0          |
| <i>DENND4B</i> | Caudate | 1.25E-07   | 0.000757  | 9.89E-09 | increasing     | 0          |
| <i>DENND6B</i> | Caudate | 6.23E-11   | 0.000354  | 0.01331  | other          | 0          |
| <i>DEPDC5</i>  | Caudate | 1.47E-10   | 0.000846  | 9.32E-12 | increasing     | 0          |
| <i>DERA</i>    | Caudate | 3.66E-09   | -0.00076  | 1.39E-09 | decreasing     | 0          |
| <i>DGCR14</i>  | Caudate | 5.52E-09   | 0.00037   | 0.012481 | other          | 0          |
| <i>DGCR2</i>   | Caudate | 6.06E-11   | 0.000741  | 1.80E-08 | increasing     | 0          |
| <i>DGCR6</i>   | Caudate | 6.44E-13   | 0.000254  | 0.079815 | other          | 0          |

**Supplementary Table 9. Genes with a significant age effect from either ANOVA or linear regression. Beta is the regression coefficient, Pval is the p-value for the regression coefficient of expression on age (in days). Effect category is increasing if beta is positive and significant, decreasing if beta is negative and significant, and other if the ANOVA were significant rather than the linear regression. Local eQTL is 1 if the gene had a significant local eQTL**

| Gene           | Tissue  | Anova.pval | Beta     | Pval     | EffectCategory | Local eQTL |
|----------------|---------|------------|----------|----------|----------------|------------|
| <i>DGKA</i>    | Caudate | 1.09E-15   | 0.000869 | 5.40E-13 | increasing     | 0          |
| <i>DGKB</i>    | Caudate | 1.13E-12   | -0.0003  | 0.035119 | other          | 0          |
| <i>DGKQ</i>    | Caudate | 1.31E-10   | 0.000601 | 2.02E-05 | increasing     | 0          |
| <i>DHCR24</i>  | Caudate | 2.42E-08   | 0.000476 | 0.000828 | other          | 0          |
| <i>DHRS11</i>  | Caudate | 5.90E-10   | 0.000425 | 0.002908 | other          | 0          |
| <i>DHRS13</i>  | Caudate | 1.58E-11   | 0.00011  | 0.457912 | other          | 0          |
| <i>DHTKD1</i>  | Caudate | 2.80E-09   | 0.000384 | 0.009455 | other          | 0          |
| <i>DHX30</i>   | Caudate | 7.42E-12   | 0.000522 | 0.000315 | other          | 0          |
| <i>DHX34</i>   | Caudate | 4.92E-08   | 0.000317 | 0.027236 | other          | 1          |
| <i>DHX35</i>   | Caudate | 3.53E-08   | 0.000605 | 1.82E-05 | increasing     | 0          |
| <i>DHX36</i>   | Caudate | 1.10E-08   | -0.00064 | 4.53E-06 | decreasing     | 0          |
| <i>DHX37</i>   | Caudate | 5.89E-11   | 0.000379 | 0.00945  | other          | 0          |
| <i>DHX38</i>   | Caudate | 1.60E-10   | 0.000536 | 0.000199 | other          | 0          |
| <i>DHX8</i>    | Caudate | 4.37E-11   | -0.00014 | 0.350667 | other          | 0          |
| <i>DIAPH1</i>  | Caudate | 1.98E-08   | 0.000627 | 4.86E-06 | increasing     | 0          |
| <i>DIAPH2</i>  | Caudate | 1.72E-07   | -0.0007  | 3.38E-07 | decreasing     | 0          |
| <i>DIAPH3</i>  | Caudate | 1.84E-07   | -0.00073 | 5.70E-08 | decreasing     | 0          |
| <i>DIP2C</i>   | Caudate | 1.01E-10   | 0.000448 | 0.002295 | other          | 0          |
| <i>DIRAS2</i>  | Caudate | 3.55E-10   | -0.0008  | 7.02E-10 | decreasing     | 0          |
| <i>DKK3</i>    | Caudate | 3.02E-13   | 0.000684 | 3.51E-07 | increasing     | 0          |
| <i>DLC1</i>    | Caudate | 2.74E-06   | -0.00071 | 1.58E-07 | decreasing     | 0          |
| <i>DLD</i>     | Caudate | 5.06E-13   | -0.00061 | 1.58E-05 | decreasing     | 1          |
| <i>DLG1</i>    | Caudate | 2.24E-10   | -0.00036 | 0.011781 | other          | 0          |
| <i>DLG2</i>    | Caudate | 1.23E-11   | -0.00083 | 1.25E-10 | decreasing     | 0          |
| <i>DLG3</i>    | Caudate | 7.53E-10   | -0.00058 | 3.90E-05 | decreasing     | 0          |
| <i>DLK2</i>    | Caudate | 5.34E-08   | 2.29E-05 | 0.879056 | other          | 0          |
| <i>DLX5</i>    | Caudate | 1.35E-10   | -0.00077 | 1.24E-09 | decreasing     | 0          |
| <i>DLX6</i>    | Caudate | 2.00E-07   | -0.00058 | 5.76E-05 | decreasing     | 0          |
| <i>DMAP1</i>   | Caudate | 4.89E-08   | 0.000353 | 0.017833 | other          | 0          |
| <i>DMKN</i>    | Caudate | 9.64E-14   | 0.000809 | 5.12E-11 | increasing     | 0          |
| <i>DNAJA3</i>  | Caudate | 6.57E-09   | 0.000481 | 0.001023 | other          | 0          |
| <i>DNAJB4</i>  | Caudate | 1.97E-09   | -0.00023 | 0.121925 | other          | 0          |
| <i>DNAJB5</i>  | Caudate | 9.89E-15   | -0.00087 | 3.34E-12 | decreasing     | 0          |
| <i>DNAJC13</i> | Caudate | 6.50E-08   | -0.00072 | 1.38E-07 | decreasing     | 0          |
| <i>DNAJC17</i> | Caudate | 1.88E-08   | 0.000268 | 0.063358 | other          | 1          |
| <i>DNAJC27</i> | Caudate | 5.33E-08   | -0.00079 | 1.98E-09 | decreasing     | 0          |
| <i>DNAJC5</i>  | Caudate | 1.15E-09   | 0.000175 | 0.25095  | other          | 0          |
| <i>DNAJC7</i>  | Caudate | 5.87E-11   | 0.000323 | 0.027467 | other          | 0          |
| <i>DNAL1</i>   | Caudate | 3.22E-05   | -0.0007  | 1.13E-07 | decreasing     | 0          |
| <i>DNM1</i>    | Caudate | 1.75E-09   | 0.00077  | 3.70E-09 | increasing     | 0          |

**Supplementary Table 9. Genes with a significant age effect from either ANOVA or linear regression. Beta is the regression coefficient, Pval is the p-value for the regression coefficient of expression on age (in days). Effect category is increasing if beta is positive and significant, decreasing if beta is negative and significant, and other if the ANOVA were significant rather than the linear regression. Local eQTL is 1 if the gene had a significant local eQTL**

| Gene            | Tissue  | Anova.pval | Beta      | Pval     | EffectCategory | Local eQTL |
|-----------------|---------|------------|-----------|----------|----------------|------------|
| <i>DNMBP</i>    | Caudate | 8.66E-11   | 0.000759  | 4.16E-09 | increasing     | 0          |
| <i>DNMT3A</i>   | Caudate | 5.30E-09   | 0.00024   | 0.107266 | other          | 0          |
| <i>DNPB1</i>    | Caudate | 5.86E-08   | 0.000301  | 0.041398 | other          | 0          |
| <i>DNTT</i>     | Caudate | 1.01E-11   | 0.000763  | 1.11E-09 | increasing     | 0          |
| <i>DOC2A</i>    | Caudate | 1.02E-05   | 0.000726  | 8.36E-08 | increasing     | 0          |
| <i>DOCK1</i>    | Caudate | 3.83E-09   | 0.000782  | 1.72E-09 | increasing     | 0          |
| <i>DOCK4</i>    | Caudate | 6.50E-11   | -9.32E-05 | 0.524706 | other          | 0          |
| <i>DOCK5</i>    | Caudate | 9.40E-19   | 0.000876  | 4.19E-14 | increasing     | 0          |
| <i>DOLPP1</i>   | Caudate | 4.45E-09   | -8.23E-05 | 0.584678 | other          | 0          |
| <i>DPH1</i>     | Caudate | 2.54E-08   | 0.000714  | 1.70E-07 | increasing     | 0          |
| <i>DPYSL2</i>   | Caudate | 1.28E-07   | 0.000554  | 9.29E-05 | increasing     | 0          |
| <i>DPYSL4</i>   | Caudate | 7.74E-10   | 7.08E-05  | 0.635635 | other          | 0          |
| <i>DRAM2</i>    | Caudate | 7.71E-12   | -0.00081  | 1.82E-10 | decreasing     | 0          |
| <i>DSP</i>      | Caudate | 1.74E-17   | 0.000891  | 1.14E-13 | increasing     | 0          |
| <i>DSTYK</i>    | Caudate | 5.20E-09   | 2.07E-05  | 0.889845 | other          | 0          |
| <i>DTD1</i>     | Caudate | 8.10E-08   | 0.000627  | 4.98E-06 | increasing     | 0          |
| <i>DTL</i>      | Caudate | 4.08E-09   | -0.00064  | 2.40E-06 | decreasing     | 0          |
| <i>DTNA</i>     | Caudate | 8.00E-09   | -0.00011  | 0.449043 | other          | 0          |
| <i>DTNBP1</i>   | Caudate | 2.61E-12   | 0.000708  | 6.35E-08 | increasing     | 0          |
| <i>DTWD2</i>    | Caudate | 1.71E-11   | -0.00079  | 8.65E-10 | decreasing     | 0          |
| <i>DTX2</i>     | Caudate | 1.29E-09   | 0.000682  | 8.11E-07 | increasing     | 0          |
| <i>DTX3</i>     | Caudate | 5.59E-08   | 4.49E-05  | 0.768747 | other          | 0          |
| <i>DUS1L</i>    | Caudate | 7.01E-11   | 0.000449  | 0.002335 | other          | 0          |
| <i>DUS3L</i>    | Caudate | 2.51E-11   | 0.000521  | 0.000297 | other          | 0          |
| <i>DUSP15</i>   | Caudate | 2.51E-10   | 0.000193  | 0.193311 | other          | 0          |
| <i>DUSP16</i>   | Caudate | 4.07E-09   | 0.000663  | 8.61E-07 | increasing     | 0          |
| <i>DUSP4</i>    | Caudate | 9.63E-08   | -0.00073  | 8.71E-08 | decreasing     | 0          |
| <i>DUSP6</i>    | Caudate | 3.12E-05   | -0.00072  | 1.19E-07 | decreasing     | 0          |
| <i>DUSP9</i>    | Caudate | 4.28E-08   | 0.000642  | 3.63E-06 | increasing     | 0          |
| <i>DVL1</i>     | Caudate | 1.47E-09   | 0.0006    | 2.28E-05 | increasing     | 0          |
| <i>DVL2</i>     | Caudate | 6.99E-10   | 0.000555  | 6.10E-05 | increasing     | 0          |
| <i>DVL3</i>     | Caudate | 5.34E-08   | 0.000593  | 2.81E-05 | increasing     | 0          |
| <i>DYNC1LI1</i> | Caudate | 2.49E-08   | -0.00075  | 9.62E-09 | decreasing     | 0          |
| <i>DYNC1LI2</i> | Caudate | 1.74E-07   | 7.05E-05  | 0.636994 | other          | 0          |
| <i>DYNLL2</i>   | Caudate | 4.33E-08   | 0.000114  | 0.44415  | other          | 0          |
| <i>DYNLRB1</i>  | Caudate | 5.33E-08   | 0.00024   | 0.101855 | other          | 1          |
| <i>DYRK2</i>    | Caudate | 1.15E-14   | -0.00086  | 9.85E-13 | decreasing     | 0          |
| <i>DYSF</i>     | Caudate | 6.57E-08   | 0.00041   | 0.005041 | other          | 0          |
| <i>DZIP3</i>    | Caudate | 1.70E-09   | -0.00057  | 7.85E-05 | decreasing     | 0          |
| <i>E2F2</i>     | Caudate | 8.48E-08   | -0.00043  | 0.001513 | other          | 0          |

**Supplementary Table 9. Genes with a significant age effect from either ANOVA or linear regression. Beta is the regression coefficient, Pval is the p-value for the regression coefficient of expression on age (in days). Effect category is increasing if beta is positive and significant, decreasing if beta is negative and significant, and other if the ANOVA were significant rather than the linear regression. Local eQTL is 1 if the gene had a significant local eQTL**

| Gene           | Tissue  | Anova.pval | Beta      | Pval     | EffectCategory | Local eQTL |
|----------------|---------|------------|-----------|----------|----------------|------------|
| <i>E2F3</i>    | Caudate | 2.17E-09   | -0.00062  | 7.56E-06 | decreasing     | 0          |
| <i>E4F1</i>    | Caudate | 4.50E-10   | 0.000411  | 0.00496  | other          | 0          |
| <i>EBF1</i>    | Caudate | 9.48E-14   | -0.0008   | 6.99E-11 | decreasing     | 0          |
| <i>EDEM3</i>   | Caudate | 4.53E-08   | -0.00074  | 2.23E-08 | decreasing     | 0          |
| <i>EDNRA</i>   | Caudate | 3.94E-08   | -0.00054  | 0.00017  | other          | 0          |
| <i>EDNRB</i>   | Caudate | 4.11E-09   | -0.00072  | 4.83E-08 | decreasing     | 0          |
| <i>EEA1</i>    | Caudate | 7.09E-10   | -0.00037  | 0.01103  | other          | 0          |
| <i>EEF1D</i>   | Caudate | 4.66E-09   | 0.000575  | 5.11E-05 | increasing     | 0          |
| <i>EEF2</i>    | Caudate | 5.91E-11   | 3.68E-05  | 0.807047 | other          | 0          |
| <i>EFHD1</i>   | Caudate | 1.86E-12   | 0.000733  | 1.53E-08 | increasing     | 0          |
| <i>EFNA1</i>   | Caudate | 2.39E-14   | 0.000826  | 3.84E-11 | increasing     | 0          |
| <i>EFNB1</i>   | Caudate | 2.08E-09   | 0.000157  | 0.288358 | other          | 0          |
| <i>EFR3A</i>   | Caudate | 7.36E-09   | -0.00042  | 0.003355 | other          | 0          |
| <i>EGFL6</i>   | Caudate | 8.16E-09   | 6.22E-05  | 0.680417 | other          | 0          |
| <i>EGLN1</i>   | Caudate | 6.50E-08   | 0.000215  | 0.156092 | other          | 0          |
| <i>EGLN2</i>   | Caudate | 5.12E-10   | 0.000515  | 0.000369 | other          | 0          |
| <i>EGR3</i>    | Caudate | 3.54E-08   | -4.41E-05 | 0.763624 | other          | 0          |
| <i>EHBP1</i>   | Caudate | 9.07E-08   | -0.00066  | 2.14E-06 | decreasing     | 0          |
| <i>EHBP1L1</i> | Caudate | 1.31E-09   | 0.000206  | 0.156443 | other          | 0          |
| <i>EHD1</i>    | Caudate | 1.14E-07   | 0.000693  | 4.86E-07 | increasing     | 1          |
| <i>EHMT1</i>   | Caudate | 2.42E-10   | 0.000436  | 0.002804 | other          | 0          |
| <i>EHMT2</i>   | Caudate | 1.28E-08   | 0.000488  | 0.000818 | other          | 0          |
| <i>EIF1B</i>   | Caudate | 2.25E-11   | -9.60E-05 | 0.517554 | other          | 0          |
| <i>EIF3B</i>   | Caudate | 5.24E-13   | 0.000787  | 4.03E-10 | increasing     | 0          |
| <i>ELAC2</i>   | Caudate | 2.02E-12   | 0.000281  | 0.058656 | other          | 0          |
| <i>ELAVL4</i>  | Caudate | 5.47E-09   | -0.00079  | 1.17E-09 | decreasing     | 0          |
| <i>ELK1</i>    | Caudate | 1.04E-07   | 0.000743  | 2.23E-08 | increasing     | 0          |
| <i>ELL</i>     | Caudate | 1.73E-07   | 0.000664  | 1.62E-06 | increasing     | 0          |
| <i>ELMO1</i>   | Caudate | 7.12E-08   | 5.69E-05  | 0.701363 | other          | 0          |
| <i>ELMO3</i>   | Caudate | 5.24E-10   | 0.000637  | 4.99E-06 | increasing     | 0          |
| <i>ELMOD2</i>  | Caudate | 3.73E-09   | -0.00079  | 1.28E-09 | decreasing     | 0          |
| <i>ELN</i>     | Caudate | 2.56E-07   | -0.00031  | 0.033923 | other          | 0          |
| <i>ELOVL2</i>  | Caudate | 2.31E-08   | -0.00062  | 4.48E-06 | decreasing     | 0          |
| <i>ELTD1</i>   | Caudate | 5.66E-08   | -0.00057  | 6.88E-05 | decreasing     | 0          |
| <i>EMB</i>     | Caudate | 4.27E-09   | -0.00066  | 1.92E-06 | decreasing     | 0          |
| <i>EMC10</i>   | Caudate | 1.21E-08   | 0.000326  | 0.029887 | other          | 0          |
| <i>EMCN</i>    | Caudate | 1.60E-12   | -0.0008   | 1.00E-09 | decreasing     | 0          |
| <i>EME2</i>    | Caudate | 2.44E-09   | 0.00054   | 0.000189 | other          | 0          |
| <i>EMILIN1</i> | Caudate | 9.31E-10   | 0.000193  | 0.197788 | other          | 0          |
| <i>EML1</i>    | Caudate | 1.53E-08   | 0.000433  | 0.002428 | other          | 0          |

**Supplementary Table 9. Genes with a significant age effect from either ANOVA or linear regression. Beta is the regression coefficient, Pval is the p-value for the regression coefficient of expression on age (in days). Effect category is increasing if beta is positive and significant, decreasing if beta is negative and significant, and other if the ANOVA were significant rather than the linear regression. Local eQTL is 1 if the gene had a significant local eQTL**

| Gene           | Tissue  | Anova.pval | Beta     | Pval     | EffectCategory | Local eQTL |
|----------------|---------|------------|----------|----------|----------------|------------|
| <i>EML2</i>    | Caudate | 7.27E-13   | 0.000795 | 1.03E-09 | increasing     | 0          |
| <i>EML3</i>    | Caudate | 3.72E-12   | 0.000645 | 3.80E-06 | increasing     | 0          |
| <i>EML5</i>    | Caudate | 9.07E-09   | -0.00073 | 2.37E-08 | decreasing     | 0          |
| <i>ENAH</i>    | Caudate | 5.20E-11   | -0.0008  | 4.81E-11 | decreasing     | 0          |
| <i>ENKD1</i>   | Caudate | 2.49E-08   | 0.000235 | 0.110411 | other          | 0          |
| <i>ENKUR</i>   | Caudate | 6.02E-09   | -0.00069 | 1.40E-07 | decreasing     | 0          |
| <i>ENO2</i>    | Caudate | 4.20E-09   | 0.000618 | 7.06E-06 | increasing     | 0          |
| <i>ENOSF1</i>  | Caudate | 2.58E-07   | 0.00063  | 6.73E-06 | increasing     | 0          |
| <i>ENOX1</i>   | Caudate | 5.95E-10   | -0.00074 | 2.03E-08 | decreasing     | 0          |
| <i>ENPP2</i>   | Caudate | 5.08E-14   | 0.00079  | 4.89E-10 | increasing     | 0          |
| <i>ENPP6</i>   | Caudate | 1.73E-11   | -0.00076 | 5.40E-09 | decreasing     | 0          |
| <i>ENTHD1</i>  | Caudate | 5.99E-10   | -0.00029 | 0.009679 | other          | 0          |
| <i>ENTHD2</i>  | Caudate | 8.62E-08   | 0.000578 | 5.36E-05 | increasing     | 0          |
| <i>EPB41L2</i> | Caudate | 2.38E-09   | -0.00048 | 0.000615 | other          | 1          |
| <i>EPDR1</i>   | Caudate | 4.51E-08   | 0.000499 | 0.000452 | other          | 0          |
| <i>EPHA10</i>  | Caudate | 1.50E-09   | 0.000565 | 8.29E-05 | increasing     | 0          |
| <i>EPHA5</i>   | Caudate | 1.45E-21   | -0.00089 | 7.91E-14 | decreasing     | 0          |
| <i>EPHB2</i>   | Caudate | 1.95E-08   | 4.39E-05 | 0.771399 | other          | 0          |
| <i>EPHB3</i>   | Caudate | 1.39E-09   | 1.69E-05 | 0.909663 | other          | 0          |
| <i>EPHB6</i>   | Caudate | 4.35E-11   | 0.000574 | 5.00E-05 | increasing     | 0          |
| <i>EPHX1</i>   | Caudate | 1.38E-10   | 0.000722 | 7.99E-08 | increasing     | 0          |
| <i>EPN3</i>    | Caudate | 7.37E-08   | 0.000773 | 6.31E-09 | increasing     | 0          |
| <i>EPS15</i>   | Caudate | 1.39E-11   | -0.00061 | 1.38E-05 | decreasing     | 0          |
| <i>EPS8L2</i>  | Caudate | 2.43E-07   | 0.000746 | 3.07E-08 | increasing     | 0          |
| <i>EPT1</i>    | Caudate | 1.17E-07   | -0.00047 | 0.00097  | other          | 0          |
| <i>ERBB2IP</i> | Caudate | 1.33E-08   | 0.000434 | 0.002507 | other          | 0          |
| <i>ERBB3</i>   | Caudate | 4.20E-11   | 0.000795 | 4.32E-10 | increasing     | 0          |
| <i>ERCC2</i>   | Caudate | 9.07E-08   | -0.00026 | 0.078262 | other          | 0          |
| <i>ERLIN1</i>  | Caudate | 5.00E-08   | 0.000534 | 0.000163 | other          | 0          |
| <i>ERMN</i>    | Caudate | 2.78E-14   | 0.000718 | 4.84E-08 | increasing     | 0          |
| <i>ERO1LB</i>  | Caudate | 4.51E-08   | -0.00039 | 0.007641 | other          | 0          |
| <i>ERP44</i>   | Caudate | 7.88E-11   | -0.00045 | 0.001832 | other          | 0          |
| <i>ESRRG</i>   | Caudate | 4.31E-09   | -0.00075 | 3.16E-08 | decreasing     | 0          |
| <i>ESYT1</i>   | Caudate | 6.76E-08   | 0.000515 | 0.000373 | other          | 0          |
| <i>ESYT3</i>   | Caudate | 1.43E-11   | 0.000749 | 5.45E-09 | increasing     | 0          |
| <i>ETNK2</i>   | Caudate | 1.36E-11   | -0.00072 | 8.24E-08 | decreasing     | 0          |
| <i>ETNPPL</i>  | Caudate | 2.78E-09   | 0.000665 | 6.29E-07 | increasing     | 0          |
| <i>ETS1</i>    | Caudate | 3.19E-11   | -0.00071 | 1.31E-07 | decreasing     | 0          |
| <i>ETV5</i>    | Caudate | 1.68E-07   | -0.00045 | 0.001626 | other          | 0          |
| <i>EVA1C</i>   | Caudate | 3.30E-10   | 0.000837 | 6.01E-11 | increasing     | 0          |

**Supplementary Table 9. Genes with a significant age effect from either ANOVA or linear regression. Beta is the regression coefficient, Pval is the p-value for the regression coefficient of expression on age (in days). Effect category is increasing if beta is positive and significant, decreasing if beta is negative and significant, and other if the ANOVA were significant rather than the linear regression. Local eQTL is 1 if the gene had a significant local eQTL**

| Gene            | Tissue  | Anova.pval | Beta     | Pval     | EffectCategory | Local eQTL |
|-----------------|---------|------------|----------|----------|----------------|------------|
| <i>EVC</i>      | Caudate | 6.11E-08   | 0.000289 | 0.054378 | other          | 0          |
| <i>EVI2A</i>    | Caudate | 1.61E-07   | 0.000475 | 0.000908 | other          | 0          |
| <i>EVI5L</i>    | Caudate | 9.92E-10   | 0.000448 | 0.002329 | other          | 0          |
| <i>EVPL</i>     | Caudate | 2.52E-10   | 0.000771 | 1.30E-09 | increasing     | 0          |
| <i>EXD3</i>     | Caudate | 2.43E-08   | 0.000708 | 1.82E-07 | increasing     | 1          |
| <i>EXOC3</i>    | Caudate | 9.04E-08   | 0.000519 | 0.000347 | other          | 0          |
| <i>EXOC3L1</i>  | Caudate | 1.89E-09   | 0.000584 | 4.35E-05 | increasing     | 0          |
| <i>EXOC7</i>    | Caudate | 1.55E-09   | 0.000473 | 0.001125 | other          | 1          |
| <i>EXOSC6</i>   | Caudate | 2.27E-10   | 0.000348 | 0.017976 | other          | 0          |
| <i>EXT1</i>     | Caudate | 2.26E-10   | -0.00055 | 5.89E-05 | decreasing     | 0          |
| <i>EYA1</i>     | Caudate | 4.04E-08   | 0.000296 | 0.046792 | other          | 0          |
| <i>EZH1</i>     | Caudate | 5.68E-14   | 0.000853 | 2.60E-12 | increasing     | 0          |
| <i>EZH2</i>     | Caudate | 5.08E-09   | -0.00052 | 0.000264 | other          | 0          |
| <i>F10</i>      | Caudate | 1.35E-08   | 0.000661 | 1.98E-06 | increasing     | 0          |
| <i>F12</i>      | Caudate | 1.12E-10   | 0.000787 | 2.45E-09 | increasing     | 0          |
| <i>FA2H</i>     | Caudate | 1.19E-07   | 0.000714 | 4.75E-08 | increasing     | 0          |
| <i>FABP7</i>    | Caudate | 4.91E-14   | -0.00083 | 5.89E-12 | decreasing     | 0          |
| <i>FADS3</i>    | Caudate | 1.26E-10   | 0.000385 | 0.008574 | other          | 0          |
| <i>FAHD1</i>    | Caudate | 2.40E-08   | 0.000633 | 3.30E-06 | increasing     | 0          |
| <i>FAM101A</i>  | Caudate | 5.22E-12   | 0.000432 | 0.00213  | other          | 0          |
| <i>FAM101B</i>  | Caudate | 4.56E-09   | 0.000701 | 2.32E-07 | increasing     | 1          |
| <i>FAM102A</i>  | Caudate | 6.98E-08   | 0.000607 | 1.01E-05 | increasing     | 0          |
| <i>FAM102B</i>  | Caudate | 1.38E-11   | -0.00079 | 3.08E-10 | decreasing     | 0          |
| <i>FAM104B</i>  | Caudate | 2.52E-08   | -0.00049 | 0.000726 | other          | 0          |
| <i>FAM109A</i>  | Caudate | 7.15E-08   | 0.000297 | 0.041395 | other          | 0          |
| <i>FAM109B</i>  | Caudate | 2.16E-07   | -0.00034 | 0.021815 | other          | 0          |
| <i>FAM111A</i>  | Caudate | 1.86E-07   | -0.00038 | 0.009751 | other          | 0          |
| <i>FAM115A</i>  | Caudate | 6.52E-10   | 0.000576 | 5.62E-05 | increasing     | 0          |
| <i>FAM117A</i>  | Caudate | 3.00E-11   | 0.000794 | 5.69E-10 | increasing     | 0          |
| <i>FAM131B</i>  | Caudate | 6.70E-11   | 0.000355 | 0.01654  | other          | 0          |
| <i>FAM132B</i>  | Caudate | 3.60E-07   | 0.000728 | 3.94E-08 | increasing     | 0          |
| <i>FAM135A</i>  | Caudate | 7.61E-08   | -0.00067 | 8.36E-07 | decreasing     | 0          |
| <i>FAM13B</i>   | Caudate | 2.58E-08   | -0.00069 | 5.26E-07 | decreasing     | 0          |
| <i>FAM151A</i>  | Caudate | 3.79E-09   | 0.00078  | 3.86E-09 | increasing     | 0          |
| <i>FAM151B</i>  | Caudate | 6.41E-09   | -0.0008  | 1.78E-10 | decreasing     | 0          |
| <i>FAM155A</i>  | Caudate | 4.72E-12   | -0.00081 | 1.98E-10 | decreasing     | 0          |
| <i>FAM160B1</i> | Caudate | 1.06E-09   | -0.00075 | 2.39E-08 | decreasing     | 0          |
| <i>FAM163B</i>  | Caudate | 1.27E-08   | -0.00056 | 5.02E-05 | decreasing     | 0          |
| <i>FAM171A2</i> | Caudate | 2.70E-10   | 0.000236 | 0.116802 | other          | 0          |
| <i>FAM173A</i>  | Caudate | 4.55E-08   | 0.000574 | 5.76E-05 | increasing     | 0          |



**Supplementary Table 9. Genes with a significant age effect from either ANOVA or linear regression. Beta is the regression coefficient, Pval is the p-value for the regression coefficient of expression on age (in days). Effect category is increasing if beta is positive and significant, decreasing if beta is negative and significant, and other if the ANOVA were significant rather than the linear regression. Local eQTL is 1 if the gene had a significant local eQTL**

| Gene           | Tissue  | Anova.pval | Beta     | Pval     | EffectCategory | Local eQTL |
|----------------|---------|------------|----------|----------|----------------|------------|
| <i>FAM181B</i> | Caudate | 1.66E-08   | 0.000124 | 0.395358 | other          | 0          |
| <i>FAM184A</i> | Caudate | 6.49E-10   | -0.00072 | 2.59E-08 | decreasing     | 0          |
| <i>FAM196A</i> | Caudate | 6.38E-09   | -0.00047 | 0.000975 | other          | 0          |
| <i>FAM198B</i> | Caudate | 1.11E-08   | -0.00067 | 4.95E-07 | decreasing     | 0          |
| <i>FAM199X</i> | Caudate | 1.50E-07   | -0.00014 | 0.353048 | other          | 0          |
| <i>FAM19A1</i> | Caudate | 6.35E-10   | -0.00079 | 3.53E-10 | decreasing     | 0          |
| <i>FAM19A2</i> | Caudate | 1.05E-17   | -0.00086 | 2.62E-12 | decreasing     | 0          |
| <i>FAM19A5</i> | Caudate | 8.95E-08   | 6.16E-06 | 0.966911 | other          | 0          |
| <i>FAM207A</i> | Caudate | 1.16E-10   | 0.000789 | 2.23E-09 | increasing     | 0          |
| <i>FAM208A</i> | Caudate | 1.52E-08   | -0.00066 | 1.14E-06 | decreasing     | 0          |
| <i>FAM208B</i> | Caudate | 6.09E-08   | -0.00052 | 0.000299 | other          | 0          |
| <i>FAM20B</i>  | Caudate | 1.27E-08   | 0.000711 | 1.31E-07 | increasing     | 0          |
| <i>FAM214A</i> | Caudate | 1.13E-10   | -0.00072 | 8.54E-08 | decreasing     | 0          |
| <i>FAM3C</i>   | Caudate | 6.17E-14   | -0.00084 | 2.94E-11 | decreasing     | 0          |
| <i>FAM69B</i>  | Caudate | 3.39E-12   | 0.000149 | 0.32212  | other          | 0          |
| <i>FAM71E1</i> | Caudate | 1.57E-07   | 0.000425 | 0.003814 | other          | 0          |
| <i>FAM73A</i>  | Caudate | 5.50E-10   | -0.00042 | 0.003531 | other          | 0          |
| <i>FAM73B</i>  | Caudate | 2.01E-08   | 0.000625 | 9.46E-06 | increasing     | 0          |
| <i>FAM76B</i>  | Caudate | 3.42E-07   | -0.00069 | 2.58E-07 | decreasing     | 0          |
| <i>FAM78A</i>  | Caudate | 3.58E-08   | 0.000325 | 0.027153 | other          | 0          |
| <i>FAM83D</i>  | Caudate | 8.91E-08   | 0.000562 | 6.48E-05 | increasing     | 0          |
| <i>FAM84A</i>  | Caudate | 8.84E-12   | -0.00073 | 3.55E-08 | decreasing     | 0          |
| <i>FAM84B</i>  | Caudate | 6.96E-11   | -0.00079 | 8.54E-10 | decreasing     | 0          |
| <i>FAM89B</i>  | Caudate | 1.14E-08   | 0.000257 | 0.086297 | other          | 0          |
| <i>FAM8A1</i>  | Caudate | 3.60E-10   | -0.00078 | 1.11E-09 | decreasing     | 0          |
| <i>FANCG</i>   | Caudate | 5.80E-09   | 0.000489 | 0.000438 | other          | 0          |
| <i>FAR1</i>    | Caudate | 1.45E-11   | -0.0007  | 2.77E-07 | decreasing     | 0          |
| <i>FARP2</i>   | Caudate | 2.53E-09   | 0.000539 | 0.00012  | other          | 0          |
| <i>FARSB</i>   | Caudate | 4.43E-12   | -0.00057 | 6.84E-05 | decreasing     | 0          |
| <i>FASN</i>    | Caudate | 1.07E-09   | 0.000389 | 0.008904 | other          | 0          |
| <i>FAT3</i>    | Caudate | 2.70E-06   | -0.00072 | 1.51E-07 | decreasing     | 0          |
| <i>FBF1</i>    | Caudate | 7.66E-11   | 0.000681 | 7.88E-07 | increasing     | 0          |
| <i>FBLN2</i>   | Caudate | 1.67E-07   | -0.00041 | 0.005412 | other          | 0          |
| <i>FBN2</i>    | Caudate | 1.31E-10   | -0.00014 | 0.358907 | other          | 0          |
| <i>FBXL15</i>  | Caudate | 1.21E-07   | 0.000493 | 0.000747 | other          | 0          |
| <i>FBXL19</i>  | Caudate | 6.13E-09   | 0.000264 | 0.080956 | other          | 0          |
| <i>FBXL8</i>   | Caudate | 4.75E-11   | 0.000368 | 0.01261  | other          | 0          |
| <i>FBXO11</i>  | Caudate | 2.37E-08   | -0.00073 | 5.05E-08 | decreasing     | 0          |
| <i>FBXO17</i>  | Caudate | 1.65E-09   | 0.000719 | 9.44E-08 | increasing     | 0          |
| <i>FBXO2</i>   | Caudate | 1.11E-17   | 0.000715 | 4.36E-08 | increasing     | 0          |

**Supplementary Table 9. Genes with a significant age effect from either ANOVA or linear regression. Beta is the regression coefficient, Pval is the p-value for the regression coefficient of expression on age (in days). Effect category is increasing if beta is positive and significant, decreasing if beta is negative and significant, and other if the ANOVA were significant rather than the linear regression. Local eQTL is 1 if the gene had a significant local eQTL**

| Gene           | Tissue  | Anova.pval | Beta     | Pval     | EffectCategory | Local eQTL |
|----------------|---------|------------|----------|----------|----------------|------------|
| <i>FBXO31</i>  | Caudate | 1.53E-11   | 0.00083  | 5.87E-11 | increasing     | 0          |
| <i>FBXO46</i>  | Caudate | 2.12E-08   | 0.000504 | 0.000517 | other          | 0          |
| <i>FBXO9</i>   | Caudate | 6.29E-09   | -0.00077 | 9.44E-09 | decreasing     | 0          |
| <i>FBXW4</i>   | Caudate | 6.64E-10   | 0.000702 | 2.36E-07 | increasing     | 1          |
| <i>FBXW5</i>   | Caudate | 2.79E-08   | 0.000275 | 0.069009 | other          | 0          |
| <i>FBXW7</i>   | Caudate | 1.18E-06   | -0.00076 | 1.31E-08 | decreasing     | 0          |
| <i>FBXW9</i>   | Caudate | 9.48E-09   | 9.87E-05 | 0.505849 | other          | 0          |
| <i>FCHO2</i>   | Caudate | 5.36E-11   | -0.0007  | 3.11E-07 | decreasing     | 0          |
| <i>FCHSD2</i>  | Caudate | 1.03E-07   | -0.00055 | 9.55E-05 | decreasing     | 0          |
| <i>FEM1A</i>   | Caudate | 3.26E-12   | 8.53E-05 | 0.573795 | other          | 0          |
| <i>FEM1C</i>   | Caudate | 1.14E-07   | 0.000122 | 0.417561 | other          | 1          |
| <i>FEZF2</i>   | Caudate | 4.86E-10   | 0.000724 | 4.88E-08 | increasing     | 0          |
| <i>FGF12</i>   | Caudate | 4.08E-08   | -0.00058 | 4.41E-05 | decreasing     | 0          |
| <i>FGF22</i>   | Caudate | 1.37E-08   | 0.000645 | 4.08E-06 | increasing     | 0          |
| <i>FGFR2</i>   | Caudate | 1.01E-09   | 0.000696 | 3.88E-07 | increasing     | 0          |
| <i>FGFR3</i>   | Caudate | 1.65E-10   | 0.000559 | 0.000102 | other          | 0          |
| <i>FHDC1</i>   | Caudate | 2.52E-07   | 1.07E-05 | 0.942132 | other          | 0          |
| <i>FHOD1</i>   | Caudate | 2.13E-07   | 0.000742 | 1.45E-08 | increasing     | 0          |
| <i>FHOD3</i>   | Caudate | 4.21E-12   | -0.00073 | 2.54E-08 | decreasing     | 1          |
| <i>FIGNL2</i>  | Caudate | 5.42E-11   | 0.000337 | 0.022509 | other          | 0          |
| <i>FIZ1</i>    | Caudate | 1.70E-07   | 0.000673 | 8.87E-07 | increasing     | 0          |
| <i>FJX1</i>    | Caudate | 5.26E-09   | 0.000177 | 0.230826 | other          | 0          |
| <i>FKBP10</i>  | Caudate | 9.47E-09   | 0.000182 | 0.221032 | other          | 0          |
| <i>FKBP14</i>  | Caudate | 2.70E-08   | -0.0007  | 1.21E-07 | decreasing     | 0          |
| <i>FKBP1A</i>  | Caudate | 1.05E-11   | 0.000106 | 0.468065 | other          | 0          |
| <i>FKBP5</i>   | Caudate | 2.84E-06   | 0.000718 | 1.07E-07 | increasing     | 0          |
| <i>FKBP8</i>   | Caudate | 6.61E-10   | 0.000519 | 0.000248 | other          | 0          |
| <i>FKTN</i>    | Caudate | 8.59E-10   | -0.00077 | 6.26E-09 | decreasing     | 0          |
| <i>FLCN</i>    | Caudate | 1.59E-10   | 0.000713 | 1.67E-07 | increasing     | 0          |
| <i>FLII</i>    | Caudate | 1.47E-10   | 0.000703 | 2.91E-07 | increasing     | 0          |
| <i>FLNA</i>    | Caudate | 3.26E-09   | 0.000294 | 0.043649 | other          | 0          |
| <i>FLNB</i>    | Caudate | 1.02E-10   | 0.000757 | 1.51E-08 | increasing     | 0          |
| <i>FLOT1</i>   | Caudate | 9.66E-09   | 0.000525 | 0.00025  | other          | 0          |
| <i>FLOT2</i>   | Caudate | 1.97E-11   | 0.000759 | 4.98E-09 | increasing     | 0          |
| <i>FLRT2</i>   | Caudate | 8.26E-14   | -0.00087 | 5.36E-13 | decreasing     | 0          |
| <i>FLYWCH1</i> | Caudate | 5.45E-11   | 0.000799 | 7.13E-10 | increasing     | 0          |
| <i>FMNL2</i>   | Caudate | 7.28E-08   | 0.000155 | 0.297303 | other          | 0          |
| <i>FMR1</i>    | Caudate | 5.29E-11   | -0.00073 | 5.90E-08 | decreasing     | 0          |
| <i>FN1</i>     | Caudate | 1.47E-07   | -0.00053 | 0.000243 | other          | 1          |
| <i>FN3KRP</i>  | Caudate | 7.97E-10   | 0.000727 | 8.48E-08 | increasing     | 0          |

**Supplementary Table 9. Genes with a significant age effect from either ANOVA or linear regression. Beta is the regression coefficient, Pval is the p-value for the regression coefficient of expression on age (in days). Effect category is increasing if beta is positive and significant, decreasing if beta is negative and significant, and other if the ANOVA were significant rather than the linear regression. Local eQTL is 1 if the gene had a significant local eQTL**

| Gene            | Tissue  | Anova.pval | Beta     | Pval     | EffectCategory | Local eQTL |
|-----------------|---------|------------|----------|----------|----------------|------------|
| <i>FNBP1L</i>   | Caudate | 8.23E-09   | -0.00076 | 2.99E-09 | decreasing     | 0          |
| <i>FNDC3B</i>   | Caudate | 1.96E-08   | -0.00074 | 4.42E-08 | decreasing     | 0          |
| <i>FOLH1B</i>   | Caudate | 3.15E-13   | 0.000777 | 1.21E-09 | increasing     | 1          |
| <i>FOSB</i>     | Caudate | 9.83E-09   | 0.000671 | 3.06E-07 | increasing     | 0          |
| <i>FOXG1</i>    | Caudate | 6.36E-09   | -0.00073 | 9.02E-08 | decreasing     | 0          |
| <i>FOXI3</i>    | Caudate | 1.68E-14   | -0.00035 | 0.000774 | other          | 0          |
| <i>FOXJ3</i>    | Caudate | 1.31E-07   | -0.00034 | 0.019724 | other          | 0          |
| <i>FOXO4</i>    | Caudate | 8.59E-16   | 0.000796 | 2.05E-10 | increasing     | 0          |
| <i>FOXP1</i>    | Caudate | 7.25E-16   | -0.00085 | 2.12E-11 | decreasing     | 0          |
| <i>FOXP2</i>    | Caudate | 1.64E-20   | -0.00087 | 5.94E-13 | decreasing     | 0          |
| <i>FPGS</i>     | Caudate | 1.62E-08   | 0.000608 | 1.48E-05 | increasing     | 0          |
| <i>FPR1</i>     | Caudate | 8.18E-08   | -0.00056 | 7.18E-05 | decreasing     | 0          |
| <i>FRA10AC1</i> | Caudate | 6.83E-10   | -0.00052 | 0.000325 | other          | 0          |
| <i>FRAS1</i>    | Caudate | 4.11E-13   | -0.00084 | 1.40E-11 | decreasing     | 0          |
| <i>FRMD3</i>    | Caudate | 9.72E-09   | -0.00077 | 2.09E-09 | decreasing     | 0          |
| <i>FRMD5</i>    | Caudate | 2.23E-09   | 0.000312 | 0.036436 | other          | 0          |
| <i>FRMD8</i>    | Caudate | 5.35E-09   | 0.000789 | 6.56E-10 | increasing     | 0          |
| <i>FRMPD1</i>   | Caudate | 6.60E-09   | -0.00054 | 9.77E-05 | decreasing     | 0          |
| <i>FSCN1</i>    | Caudate | 5.22E-12   | 0.000304 | 0.041522 | other          | 0          |
| <i>FST</i>      | Caudate | 1.20E-09   | -0.00077 | 5.12E-09 | decreasing     | 0          |
| <i>FTL</i>      | Caudate | 3.00E-09   | 0.00069  | 4.75E-07 | increasing     | 0          |
| <i>FUK</i>      | Caudate | 8.16E-09   | 0.000607 | 1.89E-05 | increasing     | 0          |
| <i>FUOM</i>     | Caudate | 4.11E-09   | 0.000477 | 0.001142 | other          | 0          |
| <i>FUT1</i>     | Caudate | 1.63E-07   | 0.000771 | 6.58E-09 | increasing     | 0          |
| <i>FUT9</i>     | Caudate | 5.42E-08   | -0.00067 | 1.27E-06 | decreasing     | 0          |
| <i>FUZ</i>      | Caudate | 2.18E-07   | 0.00052  | 0.00034  | other          | 0          |
| <i>FXR1</i>     | Caudate | 2.40E-07   | -0.00012 | 0.434533 | other          | 0          |
| <i>FXYD1</i>    | Caudate | 1.48E-09   | 0.000537 | 0.000115 | other          | 0          |
| <i>FXYD6</i>    | Caudate | 4.29E-09   | -0.00038 | 0.006822 | other          | 0          |
| <i>FYB</i>      | Caudate | 1.59E-07   | -0.00051 | 0.00037  | other          | 0          |
| <i>FZD3</i>     | Caudate | 7.23E-08   | -0.00075 | 1.23E-08 | decreasing     | 0          |
| <i>FZD6</i>     | Caudate | 8.30E-09   | -0.0007  | 1.56E-07 | decreasing     | 0          |
| <i>FZD8</i>     | Caudate | 2.31E-07   | 4.88E-05 | 0.742616 | other          | 0          |
| <i>G2E3</i>     | Caudate | 1.25E-06   | -0.00073 | 4.17E-08 | decreasing     | 0          |
| <i>G3BP1</i>    | Caudate | 1.22E-09   | -0.00053 | 0.000227 | other          | 0          |
| <i>G6PD</i>     | Caudate | 3.49E-10   | 0.000462 | 0.001542 | other          | 0          |
| <i>GAA</i>      | Caudate | 7.90E-08   | 0.000706 | 1.70E-07 | increasing     | 0          |
| <i>GAB1</i>     | Caudate | 1.52E-10   | 0.00044  | 0.002185 | other          | 0          |
| <i>GAB2</i>     | Caudate | 2.94E-11   | 0.000738 | 2.71E-08 | increasing     | 0          |
| <i>GABBR2</i>   | Caudate | 1.46E-08   | -0.00051 | 0.000396 | other          | 0          |

**Supplementary Table 9. Genes with a significant age effect from either ANOVA or linear regression. Beta is the regression coefficient, Pval is the p-value for the regression coefficient of expression on age (in days). Effect category is increasing if beta is positive and significant, decreasing if beta is negative and significant, and other if the ANOVA were significant rather than the linear regression. Local eQTL is 1 if the gene had a significant local eQTL**

| Gene           | Tissue  | Anova.pval | Beta      | Pval     | EffectCategory | Local eQTL |
|----------------|---------|------------|-----------|----------|----------------|------------|
| <i>GABPB2</i>  | Caudate | 1.99E-10   | 0.000751  | 1.95E-08 | increasing     | 0          |
| <i>GABRA1</i>  | Caudate | 2.37E-07   | -0.00054  | 0.000155 | other          | 0          |
| <i>GABRA2</i>  | Caudate | 3.10E-10   | -0.0007   | 2.38E-07 | decreasing     | 0          |
| <i>GABRA3</i>  | Caudate | 2.16E-09   | -0.00062  | 7.76E-06 | decreasing     | 0          |
| <i>GABRA4</i>  | Caudate | 6.04E-10   | -0.00052  | 0.000312 | other          | 0          |
| <i>GADL1</i>   | Caudate | 4.42E-10   | -0.00072  | 6.52E-08 | decreasing     | 0          |
| <i>GAK</i>     | Caudate | 2.62E-11   | 0.000324  | 0.029232 | other          | 0          |
| <i>GAL3ST2</i> | Caudate | 8.74E-09   | 0.000363  | 0.013028 | other          | 0          |
| <i>GAL3ST3</i> | Caudate | 6.38E-10   | 0.000171  | 0.259672 | other          | 0          |
| <i>GALK1</i>   | Caudate | 2.96E-08   | 0.000538  | 0.000183 | other          | 0          |
| <i>GALNT10</i> | Caudate | 8.98E-10   | -0.00044  | 0.001805 | other          | 0          |
| <i>GALNT12</i> | Caudate | 7.00E-10   | -0.00054  | 0.000104 | other          | 0          |
| <i>GALNT13</i> | Caudate | 9.02E-10   | -0.00063  | 1.83E-06 | decreasing     | 1          |
| <i>GALNT14</i> | Caudate | 5.73E-10   | -0.00073  | 1.92E-08 | decreasing     | 0          |
| <i>GALNT15</i> | Caudate | 1.20E-07   | 0.000453  | 0.001419 | other          | 0          |
| <i>GALNT18</i> | Caudate | 9.17E-12   | 0.000421  | 0.004394 | other          | 0          |
| <i>GALNT5</i>  | Caudate | 1.68E-09   | 0.000611  | 7.07E-06 | increasing     | 0          |
| <i>GALNT6</i>  | Caudate | 2.04E-12   | 0.000816  | 6.67E-11 | increasing     | 0          |
| <i>GALNT9</i>  | Caudate | 1.19E-09   | -4.52E-05 | 0.765311 | other          | 0          |
| <i>GALR3</i>   | Caudate | 2.58E-08   | 0.00066   | 2.11E-06 | increasing     | 0          |
| <i>GALT</i>    | Caudate | 1.11E-08   | 0.000349  | 0.018019 | other          | 0          |
| <i>GAMT</i>    | Caudate | 3.59E-10   | 0.000683  | 6.68E-07 | increasing     | 0          |
| <i>GANAB</i>   | Caudate | 9.09E-12   | 0.000191  | 0.210117 | other          | 0          |
| <i>GAR1</i>    | Caudate | 3.84E-08   | -0.00038  | 0.009282 | other          | 0          |
| <i>GARNL3</i>  | Caudate | 1.75E-08   | 0.000695  | 8.43E-08 | increasing     | 0          |
| <i>GAS1</i>    | Caudate | 1.96E-10   | 0.000274  | 0.057814 | other          | 0          |
| <i>GAS2L1</i>  | Caudate | 2.77E-11   | 0.000645  | 3.70E-06 | increasing     | 0          |
| <i>GAS6</i>    | Caudate | 1.00E-09   | 0.000363  | 0.015254 | other          | 0          |
| <i>GATAD1</i>  | Caudate | 2.88E-08   | 0.00044   | 0.002469 | other          | 1          |
| <i>GATAD2A</i> | Caudate | 5.02E-10   | 0.000686  | 4.99E-07 | increasing     | 0          |
| <i>GCC1</i>    | Caudate | 1.46E-10   | 0.000514  | 0.000406 | other          | 0          |
| <i>GCC2</i>    | Caudate | 4.04E-08   | -0.00064  | 4.56E-06 | decreasing     | 0          |
| <i>GCDH</i>    | Caudate | 1.57E-09   | 0.000574  | 6.04E-05 | increasing     | 0          |
| <i>GCH1</i>    | Caudate | 1.99E-07   | 0.000443  | 0.001985 | other          | 0          |
| <i>GCHFR</i>   | Caudate | 2.11E-10   | 0.00082   | 2.56E-10 | increasing     | 0          |
| <i>GCLC</i>    | Caudate | 8.95E-09   | 0.000628  | 3.50E-06 | increasing     | 0          |
| <i>GCN1L1</i>  | Caudate | 4.25E-09   | 0.000414  | 0.004754 | other          | 0          |
| <i>GCNT1</i>   | Caudate | 7.03E-10   | 0.000384  | 0.008344 | other          | 0          |
| <i>GDAP1L1</i> | Caudate | 3.26E-11   | 0.000513  | 0.000345 | other          | 0          |
| <i>GDF2</i>    | Caudate | 1.66E-08   | 0.000725  | 2.00E-08 | increasing     | 0          |

**Supplementary Table 9. Genes with a significant age effect from either ANOVA or linear regression. Beta is the regression coefficient, Pval is the p-value for the regression coefficient of expression on age (in days). Effect category is increasing if beta is positive and significant, decreasing if beta is negative and significant, and other if the ANOVA were significant rather than the linear regression. Local eQTL is 1 if the gene had a significant local eQTL**

| Gene           | Tissue  | Anova.pval | Beta      | Pval     | EffectCategory | Local eQTL |
|----------------|---------|------------|-----------|----------|----------------|------------|
| <i>GDF5</i>    | Caudate | 2.59E-06   | -0.00076  | 1.51E-08 | decreasing     | 0          |
| <i>GDF9</i>    | Caudate | 2.06E-06   | -0.00071  | 1.71E-07 | decreasing     | 0          |
| <i>GDPD1</i>   | Caudate | 6.65E-11   | -0.00077  | 9.42E-09 | decreasing     | 0          |
| <i>GEN1</i>    | Caudate | 1.98E-08   | -0.00066  | 4.87E-07 | decreasing     | 1          |
| <i>GET4</i>    | Caudate | 1.40E-09   | 0.000655  | 2.73E-06 | increasing     | 0          |
| <i>GFER</i>    | Caudate | 4.42E-09   | 0.000545  | 0.000154 | other          | 0          |
| <i>GFOD1</i>   | Caudate | 2.08E-14   | 0.000733  | 8.37E-09 | increasing     | 1          |
| <i>GFOD2</i>   | Caudate | 6.32E-09   | 0.000191  | 0.20706  | other          | 0          |
| <i>GGA2</i>    | Caudate | 7.96E-08   | 0.000719  | 4.72E-08 | increasing     | 0          |
| <i>GGPS1</i>   | Caudate | 2.61E-07   | -0.00076  | 1.11E-08 | decreasing     | 0          |
| <i>GGT7</i>    | Caudate | 4.47E-11   | 0.000435  | 0.003062 | other          | 0          |
| <i>GHDC</i>    | Caudate | 8.59E-08   | 0.000751  | 1.63E-08 | increasing     | 0          |
| <i>GIGYF1</i>  | Caudate | 3.31E-11   | 0.00071   | 2.04E-07 | increasing     | 0          |
| <i>GIPC1</i>   | Caudate | 1.41E-08   | 0.00042   | 0.004598 | other          | 0          |
| <i>GIPC2</i>   | Caudate | 2.37E-07   | 0.000383  | 0.008608 | other          | 0          |
| <i>GJB1</i>    | Caudate | 6.02E-14   | 0.000741  | 9.20E-09 | increasing     | 0          |
| <i>GJB5</i>    | Caudate | 3.20E-10   | 0.000494  | 0.000498 | other          | 0          |
| <i>GJC1</i>    | Caudate | 3.33E-11   | -0.00058  | 4.07E-05 | decreasing     | 0          |
| <i>GJC2</i>    | Caudate | 4.63E-11   | 0.000754  | 1.11E-08 | increasing     | 0          |
| <i>GJD2</i>    | Caudate | 3.70E-15   | -0.00084  | 6.62E-12 | decreasing     | 0          |
| <i>GKAP1</i>   | Caudate | 1.19E-08   | -1.10E-05 | 0.943194 | other          | 0          |
| <i>GLCE</i>    | Caudate | 1.37E-10   | -0.00077  | 2.38E-09 | decreasing     | 0          |
| <i>GLI1</i>    | Caudate | 4.48E-08   | 0.000378  | 0.010426 | other          | 0          |
| <i>GLI4</i>    | Caudate | 6.92E-08   | 0.000498  | 0.000433 | other          | 0          |
| <i>GLMN</i>    | Caudate | 1.34E-08   | -0.00076  | 1.28E-08 | decreasing     | 0          |
| <i>GLRA2</i>   | Caudate | 9.67E-15   | -0.00085  | 5.11E-12 | decreasing     | 0          |
| <i>GLRX</i>    | Caudate | 1.18E-08   | -0.00049  | 0.00071  | other          | 0          |
| <i>GLTPD1</i>  | Caudate | 7.69E-10   | 0.00047   | 0.001244 | other          | 0          |
| <i>GLTSCR2</i> | Caudate | 1.76E-08   | 0.000484  | 0.000856 | other          | 0          |
| <i>GMEB2</i>   | Caudate | 1.14E-11   | 0.000355  | 0.017647 | other          | 0          |
| <i>GMPPB</i>   | Caudate | 7.73E-08   | 0.000267  | 0.070652 | other          | 0          |
| <i>GNA11</i>   | Caudate | 8.51E-08   | 0.000446  | 0.002487 | other          | 0          |
| <i>GNAQ</i>    | Caudate | 4.19E-12   | -0.00084  | 2.18E-11 | decreasing     | 0          |
| <i>GNAZ</i>    | Caudate | 2.41E-12   | -1.72E-05 | 0.908468 | other          | 0          |
| <i>GNB1</i>    | Caudate | 1.84E-08   | -0.00039  | 0.007257 | other          | 0          |
| <i>GNB1L</i>   | Caudate | 2.07E-09   | 0.000487  | 0.000875 | other          | 0          |
| <i>GNB4</i>    | Caudate | 9.78E-16   | -0.00084  | 4.96E-12 | decreasing     | 0          |
| <i>GNG12</i>   | Caudate | 3.40E-06   | -0.00073  | 3.50E-08 | decreasing     | 1          |
| <i>GNG2</i>    | Caudate | 3.83E-15   | -0.00071  | 3.65E-08 | decreasing     | 0          |
| <i>GNG3</i>    | Caudate | 2.30E-08   | -0.00057  | 7.07E-05 | decreasing     | 0          |

**Supplementary Table 9. Genes with a significant age effect from either ANOVA or linear regression. Beta is the regression coefficient, Pval is the p-value for the regression coefficient of expression on age (in days). Effect category is increasing if beta is positive and significant, decreasing if beta is negative and significant, and other if the ANOVA were significant rather than the linear regression. Local eQTL is 1 if the gene had a significant local eQTL**

| Gene           | Tissue  | Anova.pval | Beta     | Pval     | EffectCategory | Local eQTL |
|----------------|---------|------------|----------|----------|----------------|------------|
| <i>GNL1</i>    | Caudate | 4.36E-14   | 0.000812 | 5.91E-11 | increasing     | 0          |
| <i>GNMT</i>    | Caudate | 5.29E-05   | 0.000711 | 1.92E-07 | increasing     | 0          |
| <i>GNPNAT1</i> | Caudate | 5.47E-10   | -0.00077 | 6.92E-09 | decreasing     | 0          |
| <i>GNPTAB</i>  | Caudate | 5.59E-09   | -0.00078 | 3.36E-09 | decreasing     | 0          |
| <i>GNPTG</i>   | Caudate | 2.55E-07   | 0.00041  | 0.005642 | other          | 0          |
| <i>GOLGA3</i>  | Caudate | 7.73E-12   | 0.000477 | 0.001146 | other          | 0          |
| <i>GOLGA4</i>  | Caudate | 2.42E-08   | -0.0006  | 1.39E-05 | decreasing     | 0          |
| <i>GOLT1B</i>  | Caudate | 7.86E-07   | -0.00072 | 1.16E-07 | decreasing     | 0          |
| <i>GOPC</i>    | Caudate | 5.11E-10   | -0.00073 | 3.15E-08 | decreasing     | 0          |
| <i>GORASP1</i> | Caudate | 1.03E-07   | 0.000379 | 0.010964 | other          | 1          |
| <i>GPAA1</i>   | Caudate | 7.43E-10   | 0.000592 | 3.17E-05 | increasing     | 0          |
| <i>GPATCH4</i> | Caudate | 2.22E-08   | 0.000321 | 0.027469 | other          | 0          |
| <i>GPBP1L1</i> | Caudate | 6.52E-11   | -0.00016 | 0.287258 | other          | 0          |
| <i>GPCPD1</i>  | Caudate | 1.13E-07   | -0.00072 | 7.79E-08 | decreasing     | 0          |
| <i>GPHN</i>    | Caudate | 6.34E-11   | -0.0008  | 1.14E-09 | decreasing     | 0          |
| <i>GPKOW</i>   | Caudate | 8.04E-08   | 0.000209 | 0.163117 | other          | 0          |
| <i>GPM6B</i>   | Caudate | 7.54E-10   | -0.00066 | 1.74E-06 | decreasing     | 0          |
| <i>GPN2</i>    | Caudate | 2.26E-09   | 0.000551 | 0.000128 | other          | 0          |
| <i>GPNMB</i>   | Caudate | 1.94E-09   | 0.000592 | 2.16E-05 | increasing     | 0          |
| <i>GPR101</i>  | Caudate | 5.95E-15   | 0.000847 | 6.85E-12 | increasing     | 0          |
| <i>GPR126</i>  | Caudate | 3.60E-12   | -0.00018 | 0.209986 | other          | 0          |
| <i>GPR133</i>  | Caudate | 6.35E-08   | 0.000391 | 0.005827 | other          | 0          |
| <i>GPR143</i>  | Caudate | 1.59E-09   | 0.000813 | 1.96E-10 | increasing     | 0          |
| <i>GPR146</i>  | Caudate | 3.35E-07   | 0.000727 | 6.48E-08 | increasing     | 0          |
| <i>GPR158</i>  | Caudate | 2.23E-08   | -0.00055 | 8.50E-05 | decreasing     | 0          |
| <i>GPR162</i>  | Caudate | 2.34E-14   | 0.000279 | 0.053566 | other          | 0          |
| <i>GPR171</i>  | Caudate | 6.90E-10   | -0.00072 | 1.19E-07 | decreasing     | 0          |
| <i>GPR27</i>   | Caudate | 2.45E-11   | 0.000504 | 0.000531 | other          | 0          |
| <i>GPR37</i>   | Caudate | 7.96E-17   | 0.000793 | 3.77E-10 | increasing     | 0          |
| <i>GPR52</i>   | Caudate | 8.89E-08   | -0.00035 | 0.017634 | other          | 0          |
| <i>GPR62</i>   | Caudate | 2.37E-12   | 0.000824 | 1.90E-10 | increasing     | 0          |
| <i>GPR63</i>   | Caudate | 2.83E-08   | -0.00077 | 3.91E-09 | decreasing     | 0          |
| <i>GPR82</i>   | Caudate | 6.60E-08   | -0.00071 | 1.15E-07 | decreasing     | 0          |
| <i>GPR85</i>   | Caudate | 7.74E-07   | -0.00075 | 1.98E-08 | decreasing     | 0          |
| <i>GPR88</i>   | Caudate | 2.20E-07   | -0.00061 | 1.72E-05 | decreasing     | 0          |
| <i>GPRC5B</i>  | Caudate | 4.52E-15   | 0.000851 | 6.74E-13 | increasing     | 0          |
| <i>GPRIN3</i>  | Caudate | 7.13E-10   | -0.00076 | 1.38E-08 | decreasing     | 0          |
| <i>GPS1</i>    | Caudate | 7.26E-13   | 0.000213 | 0.15245  | other          | 0          |
| <i>GPSM1</i>   | Caudate | 6.81E-11   | 0.00032  | 0.026046 | other          | 0          |
| <i>GPT2</i>    | Caudate | 1.26E-09   | 0.000362 | 0.015247 | other          | 0          |

**Supplementary Table 9. Genes with a significant age effect from either ANOVA or linear regression. Beta is the regression coefficient, Pval is the p-value for the regression coefficient of expression on age (in days). Effect category is increasing if beta is positive and significant, decreasing if beta is negative and significant, and other if the ANOVA were significant rather than the linear regression. Local eQTL is 1 if the gene had a significant local eQTL**

| Gene           | Tissue  | Anova.pval | Beta      | Pval     | EffectCategory | Local eQTL |
|----------------|---------|------------|-----------|----------|----------------|------------|
| <i>GPX1</i>    | Caudate | 4.84E-13   | 0.000797  | 7.86E-10 | increasing     | 0          |
| <i>GPX2</i>    | Caudate | 1.46E-09   | 0.000276  | 0.058944 | other          | 0          |
| <i>GRAMD1A</i> | Caudate | 5.77E-11   | 0.0003    | 0.040983 | other          | 0          |
| <i>GRAMD1C</i> | Caudate | 5.19E-08   | -1.22E-05 | 0.935037 | other          | 1          |
| <i>GRAP</i>    | Caudate | 6.45E-08   | -0.00027  | 0.068746 | other          | 0          |
| <i>GRB2</i>    | Caudate | 2.98E-08   | 4.12E-05  | 0.786185 | other          | 0          |
| <i>GRIA1</i>   | Caudate | 3.37E-12   | -0.00076  | 3.72E-09 | decreasing     | 0          |
| <i>GRIK3</i>   | Caudate | 1.23E-07   | -0.00023  | 0.119683 | other          | 0          |
| <i>GRIN2C</i>  | Caudate | 6.66E-13   | 0.00074   | 5.66E-09 | increasing     | 0          |
| <i>GRIP1</i>   | Caudate | 8.26E-08   | -0.00065  | 2.68E-06 | decreasing     | 0          |
| <i>GRK4</i>    | Caudate | 3.97E-09   | 0.000822  | 6.74E-11 | increasing     | 0          |
| <i>GRK5</i>    | Caudate | 2.19E-08   | 0.000119  | 0.432594 | other          | 0          |
| <i>GRK6</i>    | Caudate | 1.03E-12   | 0.000317  | 0.033335 | other          | 0          |
| <i>GRM1</i>    | Caudate | 3.12E-08   | -0.00041  | 0.00436  | other          | 1          |
| <i>GRM3</i>    | Caudate | 1.74E-13   | -0.00084  | 1.40E-11 | decreasing     | 0          |
| <i>GRM5</i>    | Caudate | 1.65E-06   | -0.0007   | 1.86E-07 | decreasing     | 0          |
| <i>GRM7</i>    | Caudate | 3.44E-09   | -0.00069  | 1.72E-07 | decreasing     | 0          |
| <i>GSTA4</i>   | Caudate | 1.27E-07   | -0.0007   | 7.89E-08 | decreasing     | 0          |
| <i>GSTM5</i>   | Caudate | 1.78E-07   | 0.000111  | 0.466247 | other          | 0          |
| <i>GSTP1</i>   | Caudate | 6.14E-10   | 0.00043   | 0.002778 | other          | 0          |
| <i>GTF2F1</i>  | Caudate | 1.94E-08   | 0.000355  | 0.015979 | other          | 0          |
| <i>GTF2I</i>   | Caudate | 4.39E-08   | -0.00066  | 6.83E-07 | decreasing     | 0          |
| <i>GTF3C5</i>  | Caudate | 1.84E-07   | 0.000627  | 7.59E-06 | increasing     | 0          |
| <i>GTF3C6</i>  | Caudate | 7.42E-08   | -0.00055  | 0.000136 | other          | 0          |
| <i>GTPBP1</i>  | Caudate | 1.79E-10   | 0.000319  | 0.029401 | other          | 0          |
| <i>GUCD1</i>   | Caudate | 1.10E-07   | 0.00024   | 0.108757 | other          | 0          |
| <i>GUCY1A2</i> | Caudate | 6.86E-09   | -0.00078  | 3.83E-09 | decreasing     | 0          |
| <i>GYPC</i>    | Caudate | 2.50E-09   | -0.0002   | 0.195621 | other          | 1          |
| <i>H6PD</i>    | Caudate | 1.13E-10   | 0.000637  | 5.80E-06 | increasing     | 0          |
| <i>HABP4</i>   | Caudate | 3.68E-16   | 0.000692  | 1.53E-07 | increasing     | 0          |
| <i>HAGH</i>    | Caudate | 2.74E-18   | 0.000716  | 7.50E-08 | increasing     | 0          |
| <i>HAGHL</i>   | Caudate | 1.07E-09   | 0.000609  | 1.61E-05 | increasing     | 0          |
| <i>HAP1</i>    | Caudate | 1.13E-08   | 0.000754  | 1.78E-08 | increasing     | 1          |
| <i>HAPLN1</i>  | Caudate | 4.69E-17   | -0.0009   | 3.27E-14 | decreasing     | 0          |
| <i>HAPLN2</i>  | Caudate | 1.72E-18   | 0.000873  | 1.92E-13 | increasing     | 0          |
| <i>HAPLN4</i>  | Caudate | 2.10E-15   | 0.000824  | 8.83E-12 | increasing     | 0          |
| <i>HAS2</i>    | Caudate | 6.28E-07   | -0.0007   | 8.23E-08 | decreasing     | 0          |
| <i>HAUS5</i>   | Caudate | 2.92E-10   | 0.000771  | 5.33E-09 | increasing     | 0          |
| <i>HBM</i>     | Caudate | 7.46E-07   | 0.000705  | 3.36E-08 | increasing     | 0          |
| <i>HCFC1R1</i> | Caudate | 6.01E-12   | -6.76E-05 | 0.644692 | other          | 0          |

**Supplementary Table 9. Genes with a significant age effect from either ANOVA or linear regression. Beta is the regression coefficient, Pval is the p-value for the regression coefficient of expression on age (in days). Effect category is increasing if beta is positive and significant, decreasing if beta is negative and significant, and other if the ANOVA were significant rather than the linear regression. Local eQTL is 1 if the gene had a significant local eQTL**

| Gene             | Tissue  | Anova.pval | Beta     | Pval     | EffectCategory | Local eQTL |
|------------------|---------|------------|----------|----------|----------------|------------|
| <i>HDAC10</i>    | Caudate | 4.78E-08   | 0.000744 | 2.39E-08 | increasing     | 0          |
| <i>HDAC11</i>    | Caudate | 3.12E-12   | 0.000687 | 3.09E-07 | increasing     | 0          |
| <i>HDAC2</i>     | Caudate | 6.18E-09   | -0.00062 | 7.98E-06 | decreasing     | 0          |
| <i>HDAC6</i>     | Caudate | 2.64E-08   | 0.000269 | 0.062444 | other          | 0          |
| <i>HDAC7</i>     | Caudate | 2.89E-08   | 0.000628 | 7.60E-06 | increasing     | 0          |
| <i>HDAC9</i>     | Caudate | 2.16E-14   | -0.00087 | 6.73E-13 | decreasing     | 0          |
| <i>HDLBP</i>     | Caudate | 1.19E-09   | 7.46E-05 | 0.620618 | other          | 0          |
| <i>HECTD2</i>    | Caudate | 1.57E-07   | -0.00066 | 1.49E-06 | decreasing     | 0          |
| <i>HEMK1</i>     | Caudate | 7.67E-07   | 0.000709 | 2.05E-07 | increasing     | 1          |
| <i>HERC2</i>     | Caudate | 7.43E-10   | 0.000713 | 1.80E-07 | increasing     | 0          |
| <i>HES4</i>      | Caudate | 1.60E-08   | 0.000546 | 0.000123 | other          | 0          |
| <i>HES7</i>      | Caudate | 7.09E-06   | 0.000719 | 1.14E-07 | increasing     | 0          |
| <i>HEXA</i>      | Caudate | 7.46E-08   | 0.000374 | 0.008635 | other          | 0          |
| <i>HEXDC</i>     | Caudate | 3.93E-10   | 0.000633 | 4.08E-06 | increasing     | 0          |
| <i>HEYL</i>      | Caudate | 6.19E-08   | 0.00057  | 2.76E-05 | increasing     | 0          |
| <i>HGS</i>       | Caudate | 3.29E-10   | 0.000553 | 0.000122 | other          | 0          |
| <i>HGSNAT</i>    | Caudate | 4.92E-10   | 0.000739 | 5.72E-09 | increasing     | 0          |
| <i>HHAT</i>      | Caudate | 9.74E-10   | 0.000644 | 3.02E-06 | increasing     | 0          |
| <i>HHATL</i>     | Caudate | 4.29E-08   | 0.000559 | 8.45E-05 | increasing     | 0          |
| <i>HHIP</i>      | Caudate | 6.90E-10   | 0.000675 | 4.86E-07 | increasing     | 0          |
| <i>HHIPL1</i>    | Caudate | 2.91E-08   | 0.000534 | 0.000226 | other          | 0          |
| <i>HIC2</i>      | Caudate | 3.51E-08   | 0.000622 | 9.26E-06 | increasing     | 0          |
| <i>HID1</i>      | Caudate | 1.95E-07   | 0.000733 | 4.82E-08 | increasing     | 0          |
| <i>HIF1A</i>     | Caudate | 1.53E-07   | -0.00066 | 2.00E-06 | decreasing     | 0          |
| <i>HIP1R</i>     | Caudate | 4.71E-09   | 0.000663 | 1.84E-06 | increasing     | 0          |
| <i>HIPK4</i>     | Caudate | 7.17E-12   | 0.000679 | 4.53E-07 | increasing     | 0          |
| <i>HIVEP2</i>    | Caudate | 1.58E-09   | -0.00069 | 2.96E-07 | decreasing     | 0          |
| <i>HK1</i>       | Caudate | 5.48E-08   | 0.000417 | 0.004925 | other          | 0          |
| <i>HLF</i>       | Caudate | 8.28E-10   | -0.00017 | 0.23801  | other          | 0          |
| <i>HMCN2</i>     | Caudate | 1.52E-07   | 0.000406 | 0.006211 | other          | 0          |
| <i>HMGCR</i>     | Caudate | 5.29E-07   | -0.00075 | 2.61E-08 | decreasing     | 0          |
| <i>HMGCS1</i>    | Caudate | 4.69E-11   | -0.00058 | 4.38E-05 | decreasing     | 0          |
| <i>HMGXB3</i>    | Caudate | 2.15E-11   | 0.000109 | 0.476876 | other          | 0          |
| <i>HMOX2</i>     | Caudate | 2.16E-08   | 0.00054  | 0.000125 | other          | 0          |
| <i>HN1</i>       | Caudate | 4.66E-11   | -0.00045 | 0.001515 | other          | 0          |
| <i>HNF1A</i>     | Caudate | 7.93E-08   | 0.000422 | 0.004423 | other          | 0          |
| <i>HNRNPA0</i>   | Caudate | 8.54E-09   | -0.00052 | 0.000283 | other          | 0          |
| <i>HNRNPA1</i>   | Caudate | 7.82E-09   | -0.00031 | 0.042445 | other          | 0          |
| <i>HNRNPA2B1</i> | Caudate | 5.40E-12   | -0.00036 | 0.016436 | other          | 0          |
| <i>HNRNPH1</i>   | Caudate | 4.57E-08   | -0.00064 | 2.81E-06 | decreasing     | 0          |



**Supplementary Table 9. Genes with a significant age effect from either ANOVA or linear regression. Beta is the regression coefficient, Pval is the p-value for the regression coefficient of expression on age (in days). Effect category is increasing if beta is positive and significant, decreasing if beta is negative and significant, and other if the ANOVA were significant rather than the linear regression. Local eQTL is 1 if the gene had a significant local eQTL**

| Gene            | Tissue  | Anova.pval | Beta     | Pval     | EffectCategory | Local eQTL |
|-----------------|---------|------------|----------|----------|----------------|------------|
| <i>HNRNPL</i>   | Caudate | 3.49E-08   | 5.65E-05 | 0.70947  | other          | 0          |
| <i>HOGA1</i>    | Caudate | 2.23E-13   | 0.000847 | 1.74E-11 | increasing     | 0          |
| <i>HOMER1</i>   | Caudate | 2.41E-11   | -0.00077 | 6.74E-09 | decreasing     | 0          |
| <i>HOMER3</i>   | Caudate | 2.54E-08   | 0.000411 | 0.005688 | other          | 0          |
| <i>HOXD1</i>    | Caudate | 2.46E-08   | 0.000622 | 2.93E-06 | increasing     | 0          |
| <i>HOXD3</i>    | Caudate | 1.78E-08   | 0.000596 | 9.53E-06 | increasing     | 0          |
| <i>HPCA</i>     | Caudate | 1.72E-12   | -0.00011 | 0.461055 | other          | 0          |
| <i>HPCAL4</i>   | Caudate | 5.76E-11   | 0.00061  | 8.94E-06 | increasing     | 0          |
| <i>HPGD</i>     | Caudate | 1.11E-09   | -0.00081 | 1.04E-10 | decreasing     | 0          |
| <i>HPN</i>      | Caudate | 3.83E-13   | 0.000782 | 5.72E-10 | increasing     | 0          |
| <i>HPRT1</i>    | Caudate | 2.47E-13   | -0.00019 | 0.195952 | other          | 0          |
| <i>HPSE2</i>    | Caudate | 1.26E-08   | 0.000656 | 1.19E-06 | increasing     | 0          |
| <i>HRH3</i>     | Caudate | 8.48E-08   | 0.000672 | 1.32E-06 | increasing     | 0          |
| <i>HS1BP3</i>   | Caudate | 9.01E-11   | 0.000537 | 0.000171 | other          | 0          |
| <i>HS2ST1</i>   | Caudate | 6.43E-11   | -0.00081 | 6.98E-10 | decreasing     | 0          |
| <i>HS3ST5</i>   | Caudate | 1.79E-10   | -0.00072 | 6.82E-08 | decreasing     | 0          |
| <i>HS6ST3</i>   | Caudate | 7.88E-10   | -0.00056 | 8.18E-05 | decreasing     | 0          |
| <i>HSBP1</i>    | Caudate | 1.10E-09   | -0.0008  | 1.42E-10 | decreasing     | 0          |
| <i>HSD11B1L</i> | Caudate | 4.74E-09   | 0.000419 | 0.003818 | other          | 1          |
| <i>HSD17B12</i> | Caudate | 6.16E-08   | -0.00072 | 1.36E-07 | decreasing     | 0          |
| <i>HSF4</i>     | Caudate | 2.59E-18   | 0.000887 | 4.16E-14 | increasing     | 0          |
| <i>HSP90B1</i>  | Caudate | 5.60E-11   | -0.00029 | 0.044656 | other          | 0          |
| <i>HSPA12B</i>  | Caudate | 2.31E-09   | 0.000666 | 1.61E-06 | increasing     | 0          |
| <i>HSPA1B</i>   | Caudate | 1.07E-07   | 0.000579 | 4.25E-05 | increasing     | 0          |
| <i>HSPA6</i>    | Caudate | 9.63E-09   | 0.000696 | 3.97E-07 | increasing     | 0          |
| <i>HSPB8</i>    | Caudate | 4.61E-13   | 0.000811 | 1.00E-10 | increasing     | 0          |
| <i>HSPD1</i>    | Caudate | 7.31E-10   | -0.00025 | 0.097709 | other          | 0          |
| <i>HTRA2</i>    | Caudate | 8.62E-08   | 0.000137 | 0.367931 | other          | 0          |
| <i>HTRA3</i>    | Caudate | 6.74E-09   | -0.00067 | 7.87E-07 | decreasing     | 0          |
| <i>HTRA4</i>    | Caudate | 2.37E-07   | 0.000624 | 2.90E-06 | increasing     | 0          |
| <i>HYOU1</i>    | Caudate | 1.92E-07   | 0.000318 | 0.026644 | other          | 0          |
| <i>IBA57</i>    | Caudate | 2.13E-07   | 0.000524 | 0.000307 | other          | 0          |
| <i>ICAM5</i>    | Caudate | 8.49E-11   | 0.000498 | 0.000556 | other          | 0          |
| <i>IDE</i>      | Caudate | 8.63E-11   | -0.00078 | 9.72E-10 | decreasing     | 0          |
| <i>IDH2</i>     | Caudate | 2.19E-13   | 0.000172 | 0.247847 | other          | 0          |
| <i>IDH3G</i>    | Caudate | 4.38E-08   | 0.000479 | 0.000971 | other          | 0          |
| <i>IFFO1</i>    | Caudate | 9.76E-12   | 0.000707 | 2.47E-07 | increasing     | 0          |
| <i>IFI16</i>    | Caudate | 3.25E-07   | -0.00073 | 6.18E-08 | decreasing     | 0          |
| <i>IFI27L2</i>  | Caudate | 3.85E-09   | 0.000684 | 7.15E-07 | increasing     | 0          |
| <i>IFI44L</i>   | Caudate | 1.71E-09   | -0.00066 | 1.24E-06 | decreasing     | 0          |

**Supplementary Table 9. Genes with a significant age effect from either ANOVA or linear regression. Beta is the regression coefficient, Pval is the p-value for the regression coefficient of expression on age (in days). Effect category is increasing if beta is positive and significant, decreasing if beta is negative and significant, and other if the ANOVA were significant rather than the linear regression. Local eQTL is 1 if the gene had a significant local eQTL**

| Gene           | Tissue  | Anova.pval | Beta      | Pval     | EffectCategory | Local eQTL |
|----------------|---------|------------|-----------|----------|----------------|------------|
| <i>IFNAR1</i>  | Caudate | 3.23E-10   | -0.00078  | 2.85E-09 | decreasing     | 0          |
| <i>IFNAR2</i>  | Caudate | 1.88E-08   | -0.00023  | 0.130845 | other          | 0          |
| <i>IFNGR1</i>  | Caudate | 5.76E-07   | -0.00076  | 1.37E-08 | decreasing     | 0          |
| <i>IFT140</i>  | Caudate | 1.84E-09   | 0.00039   | 0.006023 | other          | 0          |
| <i>IFT74</i>   | Caudate | 3.04E-08   | -0.00073  | 2.33E-08 | decreasing     | 0          |
| <i>IFT80</i>   | Caudate | 9.48E-10   | -0.00076  | 6.01E-09 | decreasing     | 0          |
| <i>IFT81</i>   | Caudate | 9.71E-11   | -0.00079  | 1.95E-10 | decreasing     | 0          |
| <i>IGF1</i>    | Caudate | 1.68E-14   | -0.00081  | 1.23E-10 | decreasing     | 0          |
| <i>IGF2BP2</i> | Caudate | 1.55E-10   | -0.00069  | 4.19E-07 | decreasing     | 0          |
| <i>IGF2BP3</i> | Caudate | 3.39E-08   | -0.00052  | 0.000173 | other          | 0          |
| <i>IGF2R</i>   | Caudate | 1.97E-12   | -0.00012  | 0.41894  | other          | 0          |
| <i>IGFALS</i>  | Caudate | 1.51E-08   | 0.00069   | 2.62E-07 | increasing     | 0          |
| <i>IGFBP2</i>  | Caudate | 1.28E-11   | -0.0005   | 0.000422 | other          | 0          |
| <i>IGFBP3</i>  | Caudate | 2.44E-07   | -0.00039  | 0.00803  | other          | 0          |
| <i>IGFBP6</i>  | Caudate | 6.45E-17   | 0.000693  | 1.89E-07 | increasing     | 0          |
| <i>IGFBP7</i>  | Caudate | 1.46E-09   | -0.00046  | 0.001331 | other          | 0          |
| <i>IGSF1</i>   | Caudate | 3.83E-09   | -0.0007   | 6.81E-08 | decreasing     | 0          |
| <i>IGSF3</i>   | Caudate | 1.00E-09   | -4.35E-05 | 0.769606 | other          | 0          |
| <i>IKZF3</i>   | Caudate | 6.34E-09   | 0.00063   | 3.18E-06 | increasing     | 0          |
| <i>IKZF5</i>   | Caudate | 5.47E-09   | -0.00025  | 0.087942 | other          | 0          |
| <i>IL10RB</i>  | Caudate | 5.25E-10   | -0.00073  | 3.60E-08 | decreasing     | 0          |
| <i>IL11RA</i>  | Caudate | 7.48E-10   | 0.000621  | 6.75E-06 | increasing     | 0          |
| <i>IL15RA</i>  | Caudate | 9.85E-16   | 0.000872  | 6.89E-14 | increasing     | 0          |
| <i>IL17D</i>   | Caudate | 3.40E-11   | 0.000468  | 0.001155 | other          | 0          |
| <i>IL17RC</i>  | Caudate | 1.56E-08   | 0.000761  | 1.30E-08 | increasing     | 0          |
| <i>IL6ST</i>   | Caudate | 2.74E-06   | -0.00075  | 2.29E-08 | decreasing     | 1          |
| <i>ILF3</i>    | Caudate | 4.72E-08   | 0.000421  | 0.004289 | other          | 0          |
| <i>ILVBL</i>   | Caudate | 1.83E-09   | 0.000649  | 3.16E-06 | increasing     | 0          |
| <i>IMP4</i>    | Caudate | 1.06E-09   | 8.84E-05  | 0.559176 | other          | 0          |
| <i>INADL</i>   | Caudate | 1.63E-10   | 0.000728  | 1.17E-08 | increasing     | 0          |
| <i>ING5</i>    | Caudate | 3.31E-11   | 0.000765  | 8.05E-09 | increasing     | 1          |
| <i>INHBA</i>   | Caudate | 1.61E-20   | -0.00088  | 2.17E-13 | decreasing     | 0          |
| <i>INO80B</i>  | Caudate | 3.14E-10   | 0.000661  | 1.86E-06 | increasing     | 0          |
| <i>INPP5A</i>  | Caudate | 3.87E-10   | 0.000514  | 0.000194 | other          | 0          |
| <i>INPP5E</i>  | Caudate | 1.02E-08   | 0.000706  | 2.44E-07 | increasing     | 0          |
| <i>INSIG2</i>  | Caudate | 7.18E-15   | -0.00071  | 1.27E-07 | decreasing     | 0          |
| <i>INTS1</i>   | Caudate | 5.03E-12   | 0.000577  | 5.43E-05 | increasing     | 0          |
| <i>IP6K3</i>   | Caudate | 1.95E-07   | 0.000784  | 2.78E-09 | increasing     | 0          |
| <i>IPMK</i>    | Caudate | 1.73E-10   | -0.00071  | 1.67E-07 | decreasing     | 0          |
| <i>IPO11</i>   | Caudate | 4.36E-08   | -0.00051  | 0.0005   | other          | 0          |

**Supplementary Table 9. Genes with a significant age effect from either ANOVA or linear regression. Beta is the regression coefficient, Pval is the p-value for the regression coefficient of expression on age (in days). Effect category is increasing if beta is positive and significant, decreasing if beta is negative and significant, and other if the ANOVA were significant rather than the linear regression. Local eQTL is 1 if the gene had a significant local eQTL**

| Gene            | Tissue  | Anova.pval | Beta     | Pval     | EffectCategory | Local eQTL |
|-----------------|---------|------------|----------|----------|----------------|------------|
| <i>IPO13</i>    | Caudate | 1.07E-08   | 0.000529 | 0.000209 | other          | 0          |
| <i>IPO9</i>     | Caudate | 1.61E-07   | -0.00028 | 0.058158 | other          | 0          |
| <i>IREB2</i>    | Caudate | 1.10E-09   | -0.00078 | 3.96E-09 | decreasing     | 0          |
| <i>IRF2</i>     | Caudate | 1.37E-14   | 0.000821 | 7.32E-11 | increasing     | 0          |
| <i>IRF2BP1</i>  | Caudate | 1.28E-10   | 0.000569 | 7.16E-05 | increasing     | 0          |
| <i>IRF2BPL</i>  | Caudate | 5.58E-09   | 0.000227 | 0.127481 | other          | 0          |
| <i>IRGQ</i>     | Caudate | 8.34E-08   | 0.000424 | 0.004109 | other          | 0          |
| <i>IRS1</i>     | Caudate | 6.24E-08   | 0.00016  | 0.296242 | other          | 0          |
| <i>ISCU</i>     | Caudate | 5.30E-08   | 0.000471 | 0.001015 | other          | 0          |
| <i>ISM1</i>     | Caudate | 3.54E-08   | -0.00066 | 2.65E-06 | decreasing     | 0          |
| <i>ISYNA1</i>   | Caudate | 2.64E-10   | 0.000617 | 1.17E-05 | increasing     | 0          |
| <i>ITFG3</i>    | Caudate | 8.12E-09   | 0.000434 | 0.003008 | other          | 0          |
| <i>ITGA1</i>    | Caudate | 9.46E-11   | -0.0008  | 9.04E-10 | decreasing     | 0          |
| <i>ITGA2B</i>   | Caudate | 5.04E-09   | 0.000694 | 3.44E-07 | increasing     | 0          |
| <i>ITGA3</i>    | Caudate | 2.41E-11   | 0.000789 | 2.18E-09 | increasing     | 0          |
| <i>ITGA9</i>    | Caudate | 5.41E-08   | -0.00032 | 0.030761 | other          | 0          |
| <i>ITGAV</i>    | Caudate | 1.52E-07   | -0.0008  | 8.16E-10 | decreasing     | 0          |
| <i>ITK</i>      | Caudate | 4.51E-08   | 0.000705 | 4.68E-08 | increasing     | 0          |
| <i>ITM2A</i>    | Caudate | 5.33E-06   | -0.00072 | 8.87E-08 | decreasing     | 0          |
| <i>ITM2B</i>    | Caudate | 4.98E-16   | -0.00035 | 0.018433 | other          | 0          |
| <i>ITPKA</i>    | Caudate | 4.51E-09   | 0.000457 | 0.001804 | other          | 0          |
| <i>ITPR1</i>    | Caudate | 2.21E-09   | 3.95E-05 | 0.790291 | other          | 0          |
| <i>ITPR3</i>    | Caudate | 7.96E-10   | 0.000821 | 7.25E-11 | increasing     | 0          |
| <i>IVNS1ABP</i> | Caudate | 2.12E-08   | -0.00076 | 1.15E-08 | decreasing     | 0          |
| <i>IZUMO4</i>   | Caudate | 2.87E-09   | 0.000524 | 0.000141 | other          | 0          |
| <i>JADE2</i>    | Caudate | 3.77E-16   | 0.000889 | 6.37E-14 | increasing     | 0          |
| <i>JAG2</i>     | Caudate | 2.41E-09   | 0.000511 | 0.000426 | other          | 0          |
| <i>JAK2</i>     | Caudate | 1.04E-07   | -0.00055 | 0.000132 | other          | 0          |
| <i>JAKMIP1</i>  | Caudate | 1.52E-08   | 0.00069  | 5.64E-07 | increasing     | 0          |
| <i>JAKMIP2</i>  | Caudate | 7.80E-12   | -0.00077 | 6.35E-10 | decreasing     | 0          |
| <i>JAKMIP3</i>  | Caudate | 3.34E-08   | 0.000742 | 2.81E-08 | increasing     | 0          |
| <i>JAM3</i>     | Caudate | 2.28E-15   | 0.000792 | 1.28E-10 | increasing     | 0          |
| <i>JAZF1</i>    | Caudate | 2.21E-07   | -0.00073 | 5.33E-08 | decreasing     | 0          |
| <i>JMJD1C</i>   | Caudate | 8.85E-14   | -0.00077 | 4.38E-09 | decreasing     | 0          |
| <i>JMJD4</i>    | Caudate | 1.68E-07   | 0.000327 | 0.026943 | other          | 0          |
| <i>JMJD8</i>    | Caudate | 5.06E-10   | 0.00038  | 0.010814 | other          | 0          |
| <i>JOSD2</i>    | Caudate | 2.46E-07   | 0.000582 | 4.07E-05 | increasing     | 0          |
| <i>JPH1</i>     | Caudate | 6.72E-12   | 0.000611 | 8.26E-06 | increasing     | 0          |
| <i>JRK</i>      | Caudate | 2.64E-12   | 0.000646 | 3.05E-06 | increasing     | 0          |
| <i>JUND</i>     | Caudate | 1.64E-08   | 0.000751 | 1.63E-08 | increasing     | 0          |

**Supplementary Table 9. Genes with a significant age effect from either ANOVA or linear regression. Beta is the regression coefficient, Pval is the p-value for the regression coefficient of expression on age (in days). Effect category is increasing if beta is positive and significant, decreasing if beta is negative and significant, and other if the ANOVA were significant rather than the linear regression. Local eQTL is 1 if the gene had a significant local eQTL**

| Gene           | Tissue  | Anova.pval | Beta      | Pval     | EffectCategory | Local eQTL |
|----------------|---------|------------|-----------|----------|----------------|------------|
| <i>KALRN</i>   | Caudate | 1.84E-10   | -0.00066  | 1.54E-06 | decreasing     | 0          |
| <i>KANK4</i>   | Caudate | 5.51E-10   | 0.00069   | 1.12E-07 | increasing     | 1          |
| <i>KAT6B</i>   | Caudate | 6.91E-08   | -0.0003   | 0.044506 | other          | 0          |
| <i>KATNB1</i>  | Caudate | 1.49E-09   | 0.000503  | 0.000565 | other          | 0          |
| <i>KATNBL1</i> | Caudate | 4.02E-06   | -0.00072  | 1.37E-07 | decreasing     | 0          |
| <i>KBTBD11</i> | Caudate | 7.28E-14   | 0.000763  | 2.24E-09 | increasing     | 0          |
| <i>KCNAB2</i>  | Caudate | 5.62E-10   | 0.000722  | 1.67E-08 | increasing     | 0          |
| <i>KCNB2</i>   | Caudate | 3.95E-15   | -0.00086  | 2.49E-12 | decreasing     | 0          |
| <i>KCND3</i>   | Caudate | 5.34E-07   | 0.000771  | 3.45E-09 | increasing     | 0          |
| <i>KCNG1</i>   | Caudate | 1.89E-09   | -0.00074  | 1.34E-08 | decreasing     | 0          |
| <i>KCNG2</i>   | Caudate | 3.43E-12   | 0.000242  | 0.107658 | other          | 0          |
| <i>KCNH2</i>   | Caudate | 3.10E-10   | 0.00067   | 7.17E-07 | increasing     | 0          |
| <i>KCNH3</i>   | Caudate | 5.21E-09   | 0.000396  | 0.007768 | other          | 0          |
| <i>KCNH5</i>   | Caudate | 2.31E-16   | -0.00087  | 4.51E-13 | decreasing     | 0          |
| <i>KCNH8</i>   | Caudate | 4.55E-12   | 0.000839  | 2.99E-11 | increasing     | 0          |
| <i>KCNIP2</i>  | Caudate | 2.61E-09   | 0.000778  | 2.07E-09 | increasing     | 0          |
| <i>KCNJ12</i>  | Caudate | 2.62E-09   | 0.000585  | 4.13E-05 | increasing     | 0          |
| <i>KCNJ14</i>  | Caudate | 1.60E-09   | 0.00051   | 0.00036  | other          | 1          |
| <i>KCNJ2</i>   | Caudate | 3.80E-11   | 0.000735  | 2.64E-08 | increasing     | 0          |
| <i>KCNJ4</i>   | Caudate | 3.11E-08   | 0.000205  | 0.177213 | other          | 0          |
| <i>KCNJ6</i>   | Caudate | 3.70E-11   | -0.00083  | 2.31E-11 | decreasing     | 0          |
| <i>KCNJ9</i>   | Caudate | 3.46E-09   | 0.000499  | 0.000633 | other          | 0          |
| <i>KCNK12</i>  | Caudate | 8.11E-11   | -6.99E-05 | 0.63358  | other          | 0          |
| <i>KCNK2</i>   | Caudate | 1.01E-07   | -0.00071  | 1.77E-07 | decreasing     | 0          |
| <i>KCNK3</i>   | Caudate | 7.01E-09   | -0.00064  | 3.24E-06 | decreasing     | 0          |
| <i>KCNK9</i>   | Caudate | 1.35E-08   | -0.00068  | 4.66E-07 | decreasing     | 0          |
| <i>KCNN1</i>   | Caudate | 2.49E-08   | 0.000629  | 4.56E-06 | increasing     | 0          |
| <i>KCNQ2</i>   | Caudate | 2.03E-08   | 0.000536  | 0.000194 | other          | 0          |
| <i>KCNT2</i>   | Caudate | 1.97E-12   | -0.00077  | 2.62E-09 | decreasing     | 0          |
| <i>KCTD11</i>  | Caudate | 1.70E-07   | 0.0006    | 1.68E-05 | increasing     | 0          |
| <i>KCTD16</i>  | Caudate | 3.02E-11   | -0.0008   | 7.08E-10 | decreasing     | 0          |
| <i>KCTD2</i>   | Caudate | 9.22E-11   | 0.000761  | 1.25E-08 | increasing     | 0          |
| <i>KCTD3</i>   | Caudate | 2.55E-09   | -0.00076  | 4.07E-09 | decreasing     | 0          |
| <i>KDELR2</i>  | Caudate | 1.17E-10   | -0.00078  | 7.00E-10 | decreasing     | 0          |
| <i>KDM1A</i>   | Caudate | 2.38E-08   | -0.00055  | 7.53E-05 | decreasing     | 0          |
| <i>KDM7A</i>   | Caudate | 3.41E-08   | -0.00037  | 0.010591 | other          | 0          |
| <i>KDR</i>     | Caudate | 6.48E-11   | -0.00079  | 1.09E-09 | decreasing     | 0          |
| <i>KDSR</i>    | Caudate | 4.25E-09   | 0.000758  | 1.58E-09 | increasing     | 0          |
| <i>KEAP1</i>   | Caudate | 1.37E-10   | 0.000462  | 0.001382 | other          | 0          |
| <i>KHK</i>     | Caudate | 5.41E-08   | 0.000573  | 6.39E-05 | increasing     | 0          |

**Supplementary Table 9. Genes with a significant age effect from either ANOVA or linear regression. Beta is the regression coefficient, Pval is the p-value for the regression coefficient of expression on age (in days). Effect category is increasing if beta is positive and significant, decreasing if beta is negative and significant, and other if the ANOVA were significant rather than the linear regression. Local eQTL is 1 if the gene had a significant local eQTL**

| Gene             | Tissue  | Anova.pval | Beta      | Pval     | EffectCategory | Local eQTL |
|------------------|---------|------------|-----------|----------|----------------|------------|
| <i>KHNYN</i>     | Caudate | 4.14E-09   | 0.00074   | 3.59E-08 | increasing     | 0          |
| <i>KIAA0195</i>  | Caudate | 2.85E-12   | 0.000765  | 8.73E-09 | increasing     | 0          |
| <i>KIAA0196</i>  | Caudate | 1.85E-07   | -0.00069  | 5.61E-07 | decreasing     | 0          |
| <i>KIAA0232</i>  | Caudate | 2.05E-07   | -0.00072  | 1.09E-07 | decreasing     | 0          |
| <i>KIAA0368</i>  | Caudate | 2.19E-08   | -0.00032  | 0.026735 | other          | 0          |
| <i>KIAA0513</i>  | Caudate | 6.68E-12   | 0.000826  | 6.06E-11 | increasing     | 0          |
| <i>KIAA0895L</i> | Caudate | 4.53E-09   | 0.00021   | 0.154349 | other          | 0          |
| <i>KIAA0930</i>  | Caudate | 1.24E-08   | 0.000588  | 3.32E-05 | increasing     | 0          |
| <i>KIAA1024</i>  | Caudate | 2.49E-07   | -0.00049  | 0.000525 | other          | 0          |
| <i>KIAA1211L</i> | Caudate | 4.55E-10   | 0.000509  | 0.000452 | other          | 0          |
| <i>KIAA1217</i>  | Caudate | 4.73E-09   | 0.000236  | 0.112597 | other          | 0          |
| <i>KIAA1377</i>  | Caudate | 8.67E-08   | -0.00065  | 2.72E-06 | decreasing     | 0          |
| <i>KIAA1586</i>  | Caudate | 2.05E-06   | -0.00076  | 9.70E-09 | decreasing     | 0          |
| <i>KIAA1598</i>  | Caudate | 5.11E-13   | 0.000751  | 6.63E-09 | increasing     | 0          |
| <i>KIAA2013</i>  | Caudate | 1.83E-07   | 0.000422  | 0.004385 | other          | 0          |
| <i>KIAA2022</i>  | Caudate | 4.83E-09   | -0.00064  | 4.59E-06 | decreasing     | 0          |
| <i>KIAA2026</i>  | Caudate | 2.85E-08   | -0.00013  | 0.389792 | other          | 0          |
| <i>KIDINS220</i> | Caudate | 8.42E-12   | -0.00079  | 8.37E-10 | decreasing     | 1          |
| <i>KIF13B</i>    | Caudate | 2.51E-13   | 0.000829  | 1.36E-11 | increasing     | 0          |
| <i>KIF15</i>     | Caudate | 8.56E-08   | -0.00048  | 0.000823 | other          | 0          |
| <i>KIF18A</i>    | Caudate | 8.84E-08   | -0.00059  | 1.58E-05 | decreasing     | 0          |
| <i>KIF1A</i>     | Caudate | 1.53E-07   | 0.00062   | 1.11E-05 | increasing     | 0          |
| <i>KIF21A</i>    | Caudate | 1.89E-08   | -0.00055  | 9.37E-05 | decreasing     | 0          |
| <i>KIF22</i>     | Caudate | 1.56E-11   | -0.0003   | 0.040422 | other          | 0          |
| <i>KIF23</i>     | Caudate | 1.97E-07   | -0.00043  | 0.002853 | other          | 0          |
| <i>KIF26A</i>    | Caudate | 5.71E-09   | -2.27E-05 | 0.878586 | other          | 0          |
| <i>KIF3A</i>     | Caudate | 6.42E-11   | -0.00064  | 4.26E-06 | decreasing     | 0          |
| <i>KIF3B</i>     | Caudate | 1.77E-08   | -0.00023  | 0.119108 | other          | 0          |
| <i>KIF5A</i>     | Caudate | 4.83E-10   | 0.000779  | 3.57E-10 | increasing     | 0          |
| <i>KIF7</i>      | Caudate | 6.76E-09   | 0.000659  | 2.10E-06 | increasing     | 0          |
| <i>KIFC2</i>     | Caudate | 6.19E-09   | 0.000482  | 0.001005 | other          | 1          |
| <i>KIFC3</i>     | Caudate | 2.59E-10   | 0.000397  | 0.005669 | other          | 0          |
| <i>KIRREL</i>    | Caudate | 7.88E-09   | -0.00045  | 0.001905 | other          | 0          |
| <i>KITLG</i>     | Caudate | 9.17E-15   | -0.00087  | 7.15E-13 | decreasing     | 0          |
| <i>KIZ</i>       | Caudate | 2.92E-13   | 0.000703  | 1.52E-07 | increasing     | 0          |
| <i>KLC2</i>      | Caudate | 4.18E-09   | 0.000763  | 6.33E-09 | increasing     | 0          |
| <i>KLF10</i>     | Caudate | 1.19E-11   | -0.00077  | 2.81E-09 | decreasing     | 0          |
| <i>KLF12</i>     | Caudate | 1.00E-11   | -0.00078  | 1.13E-09 | decreasing     | 0          |
| <i>KLF13</i>     | Caudate | 8.73E-09   | 0.00012   | 0.432892 | other          | 0          |
| <i>KLF9</i>      | Caudate | 1.96E-13   | -0.00084  | 3.89E-11 | decreasing     | 0          |

**Supplementary Table 9. Genes with a significant age effect from either ANOVA or linear regression. Beta is the regression coefficient, Pval is the p-value for the regression coefficient of expression on age (in days). Effect category is increasing if beta is positive and significant, decreasing if beta is negative and significant, and other if the ANOVA were significant rather than the linear regression. Local eQTL is 1 if the gene had a significant local eQTL**

| Gene           | Tissue  | Anova.pval | Beta     | Pval     | EffectCategory | Local eQTL |
|----------------|---------|------------|----------|----------|----------------|------------|
| <i>KLHDC10</i> | Caudate | 2.93E-08   | -0.00068 | 3.84E-07 | decreasing     | 0          |
| <i>KLHDC4</i>  | Caudate | 1.97E-08   | 0.00048  | 0.001052 | other          | 1          |
| <i>KLHDC8B</i> | Caudate | 4.56E-09   | 0.000462 | 0.000954 | other          | 0          |
| <i>KLHL17</i>  | Caudate | 3.74E-08   | 0.000536 | 0.00021  | other          | 0          |
| <i>KLHL21</i>  | Caudate | 7.75E-12   | 0.000662 | 1.14E-06 | increasing     | 0          |
| <i>KLHL22</i>  | Caudate | 1.16E-09   | 0.000516 | 0.00037  | other          | 0          |
| <i>KLHL26</i>  | Caudate | 2.27E-11   | 0.00051  | 0.000384 | other          | 0          |
| <i>KLHL28</i>  | Caudate | 4.70E-07   | -0.00072 | 7.85E-08 | decreasing     | 0          |
| <i>KLHL32</i>  | Caudate | 5.04E-09   | 0.000599 | 2.33E-05 | increasing     | 0          |
| <i>KLHL35</i>  | Caudate | 2.25E-12   | 0.000256 | 0.076628 | other          | 0          |
| <i>KLHL36</i>  | Caudate | 3.94E-09   | 0.000304 | 0.044314 | other          | 1          |
| <i>KLHL4</i>   | Caudate | 1.78E-16   | 0.000788 | 3.71E-10 | increasing     | 0          |
| <i>KLHL40</i>  | Caudate | 8.92E-08   | 0.000778 | 2.41E-09 | increasing     | 0          |
| <i>KLHL7</i>   | Caudate | 2.41E-08   | -0.00068 | 4.38E-07 | decreasing     | 0          |
| <i>KLK6</i>    | Caudate | 1.05E-15   | 0.000849 | 2.23E-12 | increasing     | 0          |
| <i>KPNA2</i>   | Caudate | 1.87E-09   | -0.0007  | 3.17E-07 | decreasing     | 0          |
| <i>KPNA3</i>   | Caudate | 9.93E-08   | -0.00068 | 7.75E-07 | decreasing     | 0          |
| <i>KPNA4</i>   | Caudate | 1.43E-09   | -0.00028 | 0.066223 | other          | 0          |
| <i>KPNA5</i>   | Caudate | 1.37E-06   | -0.00074 | 1.64E-08 | decreasing     | 0          |
| <i>KRAS</i>    | Caudate | 1.23E-10   | -0.00076 | 1.12E-08 | decreasing     | 0          |
| <i>KRBA1</i>   | Caudate | 9.83E-11   | 0.000708 | 2.26E-07 | increasing     | 0          |
| <i>KRBA2</i>   | Caudate | 9.13E-08   | 0.000453 | 0.001863 | other          | 0          |
| <i>KRBOX4</i>  | Caudate | 2.70E-05   | 0.000701 | 1.27E-07 | increasing     | 0          |
| <i>KTN1</i>    | Caudate | 2.66E-11   | -0.0003  | 0.043752 | other          | 0          |
| <i>KY</i>      | Caudate | 3.81E-14   | 0.000871 | 4.29E-12 | increasing     | 0          |
| <i>L3MBTL2</i> | Caudate | 7.79E-08   | 0.000709 | 2.26E-07 | increasing     | 0          |
| <i>LACE1</i>   | Caudate | 3.15E-07   | -0.00074 | 2.53E-08 | decreasing     | 0          |
| <i>LAMA2</i>   | Caudate | 8.49E-12   | -0.00079 | 1.50E-09 | decreasing     | 0          |
| <i>LAMA4</i>   | Caudate | 2.25E-11   | -0.00075 | 9.57E-09 | decreasing     | 0          |
| <i>LAMB3</i>   | Caudate | 1.75E-10   | 0.000413 | 0.00389  | other          | 0          |
| <i>LAMC1</i>   | Caudate | 1.05E-10   | -0.00074 | 1.88E-08 | decreasing     | 0          |
| <i>LARP4</i>   | Caudate | 2.14E-08   | -0.00062 | 1.02E-05 | decreasing     | 0          |
| <i>LARP6</i>   | Caudate | 3.81E-09   | 0.000576 | 4.81E-05 | increasing     | 1          |
| <i>LARS</i>    | Caudate | 1.18E-07   | -0.00068 | 3.66E-07 | decreasing     | 0          |
| <i>LASP1</i>   | Caudate | 4.14E-09   | -0.00058 | 3.32E-05 | decreasing     | 0          |
| <i>LAT</i>     | Caudate | 3.96E-07   | 0.000743 | 2.53E-08 | increasing     | 0          |
| <i>LBH</i>     | Caudate | 6.98E-13   | -0.00086 | 1.33E-12 | decreasing     | 0          |
| <i>LBR</i>     | Caudate | 1.55E-07   | -0.00064 | 2.13E-06 | decreasing     | 0          |
| <i>LCLAT1</i>  | Caudate | 1.20E-12   | -0.00072 | 4.38E-08 | decreasing     | 0          |
| <i>LCORL</i>   | Caudate | 2.68E-13   | -0.00085 | 2.65E-12 | decreasing     | 0          |

**Supplementary Table 9. Genes with a significant age effect from either ANOVA or linear regression. Beta is the regression coefficient, Pval is the p-value for the regression coefficient of expression on age (in days). Effect category is increasing if beta is positive and significant, decreasing if beta is negative and significant, and other if the ANOVA were significant rather than the linear regression. Local eQTL is 1 if the gene had a significant local eQTL**

| Gene                | Tissue  | Anova.pval | Beta      | Pval     | EffectCategory | Local eQTL |
|---------------------|---------|------------|-----------|----------|----------------|------------|
| <i>LDB1</i>         | Caudate | 9.80E-12   | 0.000525  | 0.000285 | other          | 0          |
| <i>LDHD</i>         | Caudate | 9.37E-08   | 0.000674  | 1.15E-06 | increasing     | 0          |
| <i>LEMD2</i>        | Caudate | 3.18E-08   | 0.000219  | 0.14886  | other          | 0          |
| <i>LEPREL1</i>      | Caudate | 4.33E-08   | 0.000656  | 6.47E-07 | increasing     | 1          |
| <i>LEPREL2</i>      | Caudate | 4.20E-10   | 0.000501  | 0.000359 | other          | 0          |
| <i>LEPREL4</i>      | Caudate | 3.01E-10   | 0.000492  | 0.000392 | other          | 0          |
| <i>LEPROTL1</i>     | Caudate | 1.63E-07   | -0.00051  | 0.000406 | other          | 0          |
| <i>LETM1</i>        | Caudate | 3.36E-10   | 0.000463  | 0.00156  | other          | 0          |
| <i>LGALS2</i>       | Caudate | 1.03E-07   | 0.000686  | 4.25E-07 | increasing     | 0          |
| <i>LGALSL</i>       | Caudate | 4.27E-12   | -0.00081  | 1.25E-10 | decreasing     | 0          |
| <i>LGI2</i>         | Caudate | 2.27E-08   | -0.00053  | 0.000158 | other          | 0          |
| <i>LGI3</i>         | Caudate | 3.29E-16   | 0.000884  | 5.78E-14 | increasing     | 0          |
| <i>LHFPL3</i>       | Caudate | 8.88E-11   | -0.00085  | 2.82E-11 | decreasing     | 0          |
| <i>LHFPL4</i>       | Caudate | 1.20E-10   | -5.13E-05 | 0.732965 | other          | 0          |
| <i>LIG1</i>         | Caudate | 1.81E-09   | 0.000345  | 0.015886 | other          | 0          |
| <i>LIMA1</i>        | Caudate | 7.64E-09   | -0.00079  | 1.76E-09 | decreasing     | 0          |
| <i>LIMCH1</i>       | Caudate | 6.46E-09   | 0.00056   | 6.79E-05 | increasing     | 0          |
| <i>LIMD2</i>        | Caudate | 2.45E-07   | 0.000149  | 0.322898 | other          | 0          |
| <i>LIME1</i>        | Caudate | 3.69E-11   | 0.000635  | 5.88E-06 | increasing     | 0          |
| <i>LIMK2</i>        | Caudate | 1.38E-08   | 0.000664  | 1.20E-06 | increasing     | 0          |
| <i>LIN7C</i>        | Caudate | 1.91E-12   | -0.00077  | 1.04E-09 | decreasing     | 0          |
| <i>LINGO2</i>       | Caudate | 1.28E-07   | -0.00066  | 1.72E-06 | decreasing     | 0          |
| <i>LIPE</i>         | Caudate | 1.14E-09   | 0.000784  | 2.47E-09 | increasing     | 0          |
| <i>LIPH</i>         | Caudate | 6.51E-08   | 0.000762  | 9.49E-09 | increasing     | 0          |
| <i>LIX1L</i>        | Caudate | 1.95E-07   | 0.000551  | 0.000126 | other          | 0          |
| <i>LLGL1</i>        | Caudate | 1.19E-10   | 0.000653  | 2.42E-06 | increasing     | 0          |
| <i>LMBRD1</i>       | Caudate | 3.80E-09   | -0.00036  | 0.013569 | other          | 0          |
| <i>LMNA</i>         | Caudate | 1.75E-08   | 0.000404  | 0.00571  | other          | 0          |
| <i>LMNB2</i>        | Caudate | 1.68E-10   | 0.000217  | 0.140311 | other          | 0          |
| <i>LMO3</i>         | Caudate | 1.63E-07   | -0.00075  | 2.13E-08 | decreasing     | 0          |
| <i>LOC103214240</i> | Caudate | 7.06E-08   | -0.00035  | 0.017221 | other          | 1          |
| <i>LOC103214253</i> | Caudate | 3.37E-15   | 0.000852  | 7.65E-12 | increasing     | 0          |
| <i>LOC103214288</i> | Caudate | 3.24E-11   | -7.53E-05 | 0.611734 | other          | 0          |
| <i>LOC103214300</i> | Caudate | 2.34E-07   | -0.0005   | 0.000397 | other          | 0          |
| <i>LOC103214446</i> | Caudate | 2.17E-16   | 0.000873  | 3.84E-13 | increasing     | 0          |
| <i>LOC103214510</i> | Caudate | 3.12E-09   | 0.000601  | 2.35E-05 | increasing     | 0          |
| <i>LOC103214520</i> | Caudate | 1.17E-11   | -0.00042  | 0.000134 | other          | 0          |
| <i>LOC103214531</i> | Caudate | 7.99E-10   | 9.60E-05  | 0.52977  | other          | 0          |
| <i>LOC103214546</i> | Caudate | 9.38E-09   | -0.00066  | 2.35E-06 | decreasing     | 0          |
| <i>LOC103214562</i> | Caudate | 5.34E-08   | -0.00027  | 0.059325 | other          | 0          |

**Supplementary Table 9. Genes with a significant age effect from either ANOVA or linear regression. Beta is the regression coefficient, Pval is the p-value for the regression coefficient of expression on age (in days). Effect category is increasing if beta is positive and significant, decreasing if beta is negative and significant, and other if the ANOVA were significant rather than the linear regression. Local eQTL is 1 if the gene had a significant local eQTL**

| Gene                | Tissue  | Anova.pval | Beta      | Pval     | EffectCategory | Local eQTL |
|---------------------|---------|------------|-----------|----------|----------------|------------|
| <i>LOC103214618</i> | Caudate | 6.41E-08   | -7.55E-05 | 0.617849 | other          | 0          |
| <i>LOC103214728</i> | Caudate | 5.07E-08   | 0.000251  | 0.097158 | other          | 0          |
| <i>LOC103214744</i> | Caudate | 2.06E-07   | 0.000574  | 4.45E-05 | increasing     | 0          |
| <i>LOC103214747</i> | Caudate | 1.34E-07   | 0.000658  | 1.07E-06 | increasing     | 0          |
| <i>LOC103214772</i> | Caudate | 1.56E-09   | -0.0008   | 1.01E-09 | decreasing     | 0          |
| <i>LOC103214785</i> | Caudate | 1.88E-07   | -0.00065  | 2.22E-06 | decreasing     | 0          |
| <i>LOC103214822</i> | Caudate | 1.34E-08   | 0.000546  | 0.00014  | other          | 0          |
| <i>LOC103214824</i> | Caudate | 1.27E-07   | -0.00073  | 8.17E-08 | decreasing     | 0          |
| <i>LOC103214847</i> | Caudate | 1.25E-09   | 0.000689  | 3.36E-07 | increasing     | 0          |
| <i>LOC103214904</i> | Caudate | 2.97E-05   | 0.000721  | 9.44E-08 | increasing     | 0          |
| <i>LOC103215235</i> | Caudate | 4.38E-09   | 0.000541  | 0.000178 | other          | 0          |
| <i>LOC103215277</i> | Caudate | 3.71E-16   | 0.000697  | 1.17E-07 | increasing     | 0          |
| <i>LOC103215364</i> | Caudate | 1.33E-06   | 0.000698  | 2.59E-07 | increasing     | 0          |
| <i>LOC103215370</i> | Caudate | 6.13E-09   | 0.000332  | 0.026308 | other          | 1          |
| <i>LOC103215486</i> | Caudate | 8.68E-06   | 0.000683  | 1.98E-07 | increasing     | 0          |
| <i>LOC103215493</i> | Caudate | 6.67E-08   | -0.00014  | 0.336265 | other          | 0          |
| <i>LOC103215517</i> | Caudate | 2.89E-08   | 0.000675  | 7.26E-07 | increasing     | 0          |
| <i>LOC103215726</i> | Caudate | 4.08E-09   | 0.000263  | 0.07497  | other          | 0          |
| <i>LOC103215734</i> | Caudate | 1.20E-07   | -0.00037  | 0.011655 | other          | 0          |
| <i>LOC103215758</i> | Caudate | 7.18E-09   | -0.00017  | 0.268398 | other          | 0          |
| <i>LOC103215811</i> | Caudate | 1.98E-07   | -0.00019  | 0.217671 | other          | 0          |
| <i>LOC103215843</i> | Caudate | 6.79E-11   | -0.00077  | 2.77E-09 | decreasing     | 0          |
| <i>LOC103215864</i> | Caudate | 5.39E-12   | 0.000791  | 7.10E-10 | increasing     | 0          |
| <i>LOC103215883</i> | Caudate | 1.09E-08   | -0.00072  | 1.78E-08 | decreasing     | 0          |
| <i>LOC103215907</i> | Caudate | 1.37E-08   | 0.000425  | 0.00401  | other          | 0          |
| <i>LOC103215957</i> | Caudate | 3.31E-08   | 0.000698  | 2.48E-07 | increasing     | 0          |
| <i>LOC103215963</i> | Caudate | 3.01E-10   | 0.000275  | 0.068678 | other          | 0          |
| <i>LOC103216023</i> | Caudate | 3.66E-08   | 0.000152  | 0.315903 | other          | 0          |
| <i>LOC103216066</i> | Caudate | 1.93E-09   | 0.000675  | 6.05E-07 | increasing     | 0          |
| <i>LOC103216108</i> | Caudate | 1.41E-07   | 0.000683  | 5.00E-07 | increasing     | 0          |
| <i>LOC103216190</i> | Caudate | 2.64E-12   | -0.00035  | 0.018056 | other          | 0          |
| <i>LOC103216365</i> | Caudate | 1.15E-09   | 0.000643  | 1.24E-06 | increasing     | 0          |
| <i>LOC103216544</i> | Caudate | 1.54E-10   | 0.000706  | 1.46E-07 | increasing     | 0          |
| <i>LOC103216563</i> | Caudate | 2.46E-07   | -0.00027  | 0.064914 | other          | 0          |
| <i>LOC103216688</i> | Caudate | 4.67E-09   | 0.000718  | 1.03E-07 | increasing     | 0          |
| <i>LOC103216690</i> | Caudate | 2.19E-07   | -0.00069  | 2.22E-07 | decreasing     | 0          |
| <i>LOC103216740</i> | Caudate | 5.16E-08   | 0.000683  | 4.57E-07 | increasing     | 0          |
| <i>LOC103216760</i> | Caudate | 8.34E-08   | 0.00033   | 0.025547 | other          | 0          |
| <i>LOC103216779</i> | Caudate | 1.21E-07   | 0.000339  | 0.024094 | other          | 0          |
| <i>LOC103216788</i> | Caudate | 6.06E-08   | 0.000297  | 0.047174 | other          | 0          |



**Supplementary Table 9. Genes with a significant age effect from either ANOVA or linear regression. Beta is the regression coefficient, Pval is the p-value for the regression coefficient of expression on age (in days). Effect category is increasing if beta is positive and significant, decreasing if beta is negative and significant, and other if the ANOVA were significant rather than the linear regression. Local eQTL is 1 if the gene had a significant local eQTL**

| Gene         | Tissue  | Anova.pval | Beta      | Pval     | EffectCategory | Local eQTL |
|--------------|---------|------------|-----------|----------|----------------|------------|
| LOC103216985 | Caudate | 8.05E-09   | -0.00028  | 0.054531 | other          | 0          |
| LOC103217039 | Caudate | 2.65E-17   | 0.00083   | 1.65E-13 | increasing     | 0          |
| LOC103217040 | Caudate | 3.70E-12   | 0.000785  | 7.53E-11 | increasing     | 0          |
| LOC103217121 | Caudate | 9.26E-10   | 0.000208  | 0.171888 | other          | 0          |
| LOC103217195 | Caudate | 1.83E-07   | -0.00048  | 0.000917 | other          | 0          |
| LOC103217276 | Caudate | 7.44E-05   | -0.00069  | 1.91E-07 | decreasing     | 1          |
| LOC103217305 | Caudate | 7.34E-08   | 2.99E-06  | 0.9842   | other          | 0          |
| LOC103217633 | Caudate | 7.25E-08   | 0.000587  | 2.36E-05 | increasing     | 1          |
| LOC103217745 | Caudate | 4.79E-08   | -0.00058  | 4.69E-05 | decreasing     | 0          |
| LOC103217768 | Caudate | 1.35E-07   | -0.00058  | 4.76E-05 | decreasing     | 0          |
| LOC103217882 | Caudate | 1.65E-12   | 0.000682  | 5.20E-07 | increasing     | 0          |
| LOC103217924 | Caudate | 1.67E-07   | -0.00059  | 7.28E-06 | decreasing     | 0          |
| LOC103217926 | Caudate | 1.86E-08   | -0.00027  | 0.023123 | other          | 0          |
| LOC103217978 | Caudate | 4.27E-09   | -0.00076  | 1.31E-08 | decreasing     | 0          |
| LOC103218258 | Caudate | 3.33E-06   | 0.000759  | 1.12E-08 | increasing     | 0          |
| LOC103218260 | Caudate | 4.30E-06   | 0.000718  | 1.38E-07 | increasing     | 0          |
| LOC103218261 | Caudate | 1.09E-09   | 0.000793  | 1.52E-09 | increasing     | 1          |
| LOC103218284 | Caudate | 2.44E-09   | 0.000384  | 0.010031 | other          | 0          |
| LOC103218293 | Caudate | 1.92E-07   | -0.00068  | 9.57E-07 | decreasing     | 0          |
| LOC103218319 | Caudate | 2.59E-09   | -0.00053  | 0.000197 | other          | 0          |
| LOC103218335 | Caudate | 3.70E-08   | 0.000458  | 0.001633 | other          | 0          |
| LOC103218545 | Caudate | 1.70E-07   | 0.000633  | 1.95E-06 | increasing     | 1          |
| LOC103218621 | Caudate | 5.31E-08   | -0.00072  | 6.86E-08 | decreasing     | 0          |
| LOC103218697 | Caudate | 3.80E-13   | -0.00072  | 5.07E-08 | decreasing     | 0          |
| LOC103218711 | Caudate | 1.11E-09   | -0.00029  | 0.050496 | other          | 0          |
| LOC103218764 | Caudate | 1.15E-07   | -0.00058  | 3.67E-05 | decreasing     | 0          |
| LOC103218854 | Caudate | 3.04E-08   | -0.00015  | 0.3107   | other          | 0          |
| LOC103218873 | Caudate | 1.09E-09   | 0.000332  | 0.025619 | other          | 0          |
| LOC103218934 | Caudate | 1.71E-09   | 0.000129  | 0.387994 | other          | 0          |
| LOC103218980 | Caudate | 4.75E-06   | 0.000742  | 3.63E-08 | increasing     | 0          |
| LOC103219243 | Caudate | 7.89E-08   | -7.27E-05 | 0.631314 | other          | 0          |
| LOC103219257 | Caudate | 8.37E-10   | 0.00041   | 0.00473  | other          | 0          |
| LOC103219292 | Caudate | 1.70E-09   | 0.000728  | 6.87E-08 | increasing     | 0          |
| LOC103219355 | Caudate | 8.81E-09   | 0.000449  | 0.001803 | other          | 0          |
| LOC103219361 | Caudate | 9.04E-09   | 0.000697  | 2.10E-07 | increasing     | 0          |
| LOC103219369 | Caudate | 2.42E-06   | 0.000681  | 2.32E-07 | increasing     | 0          |
| LOC103219454 | Caudate | 2.31E-07   | -0.00067  | 1.59E-06 | decreasing     | 0          |
| LOC103219603 | Caudate | 3.42E-05   | 0.000723  | 6.59E-08 | increasing     | 0          |
| LOC103219622 | Caudate | 9.18E-12   | 0.000401  | 0.005519 | other          | 0          |
| LOC103219642 | Caudate | 1.50E-06   | 0.000697  | 1.53E-07 | increasing     | 0          |

**Supplementary Table 9. Genes with a significant age effect from either ANOVA or linear regression. Beta is the regression coefficient, Pval is the p-value for the regression coefficient of expression on age (in days). Effect category is increasing if beta is positive and significant, decreasing if beta is negative and significant, and other if the ANOVA were significant rather than the linear regression. Local eQTL is 1 if the gene had a significant local eQTL**

| Gene                | Tissue  | Anova.pval | Beta      | Pval     | EffectCategory | Local eQTL |
|---------------------|---------|------------|-----------|----------|----------------|------------|
| <i>LOC103219657</i> | Caudate | 1.60E-07   | -0.00057  | 5.25E-05 | decreasing     | 0          |
| <i>LOC103219726</i> | Caudate | 1.19E-05   | 0.000712  | 1.87E-07 | increasing     | 0          |
| <i>LOC103219832</i> | Caudate | 2.28E-16   | 0.000859  | 2.86E-13 | increasing     | 0          |
| <i>LOC103219838</i> | Caudate | 5.15E-06   | 0.000694  | 9.76E-08 | increasing     | 0          |
| <i>LOC103219854</i> | Caudate | 5.05E-11   | 0.000767  | 5.72E-09 | increasing     | 0          |
| <i>LOC103219872</i> | Caudate | 6.89E-08   | 0.000712  | 2.42E-08 | increasing     | 0          |
| <i>LOC103219893</i> | Caudate | 1.94E-10   | 0.000787  | 7.07E-10 | increasing     | 0          |
| <i>LOC103219911</i> | Caudate | 6.85E-06   | 0.00072   | 1.19E-07 | increasing     | 0          |
| <i>LOC103219917</i> | Caudate | 2.25E-08   | -0.00041  | 0.004614 | other          | 0          |
| <i>LOC103219923</i> | Caudate | 1.43E-08   | 0.000476  | 0.000819 | other          | 0          |
| <i>LOC103220009</i> | Caudate | 9.59E-08   | 0.000254  | 0.094332 | other          | 0          |
| <i>LOC103220039</i> | Caudate | 1.40E-07   | 7.90E-05  | 0.601662 | other          | 0          |
| <i>LOC103220051</i> | Caudate | 2.29E-09   | -0.00077  | 3.81E-09 | decreasing     | 0          |
| <i>LOC103220055</i> | Caudate | 4.12E-13   | -0.00076  | 5.50E-09 | decreasing     | 0          |
| <i>LOC103220064</i> | Caudate | 5.44E-11   | 0.00071   | 3.63E-08 | increasing     | 0          |
| <i>LOC103220067</i> | Caudate | 1.50E-12   | 0.000753  | 7.58E-09 | increasing     | 0          |
| <i>LOC103220168</i> | Caudate | 4.78E-08   | -6.89E-05 | 0.647456 | other          | 0          |
| <i>LOC103220250</i> | Caudate | 8.54E-09   | -0.0005   | 0.000534 | other          | 1          |
| <i>LOC103220254</i> | Caudate | 5.24E-08   | 0.000444  | 0.002626 | other          | 0          |
| <i>LOC103220286</i> | Caudate | 5.15E-07   | -0.00071  | 1.91E-07 | decreasing     | 0          |
| <i>LOC103220291</i> | Caudate | 1.62E-09   | -0.00076  | 4.93E-09 | decreasing     | 0          |
| <i>LOC103220292</i> | Caudate | 1.91E-08   | -0.00073  | 1.73E-08 | decreasing     | 0          |
| <i>LOC103220293</i> | Caudate | 9.27E-08   | -0.00068  | 2.69E-07 | decreasing     | 0          |
| <i>LOC103220295</i> | Caudate | 1.73E-09   | -0.0007   | 1.12E-07 | decreasing     | 0          |
| <i>LOC103220316</i> | Caudate | 4.61E-06   | -0.00074  | 4.71E-08 | decreasing     | 0          |
| <i>LOC103220360</i> | Caudate | 2.41E-10   | 0.000684  | 7.52E-09 | increasing     | 0          |
| <i>LOC103220361</i> | Caudate | 2.43E-13   | 0.000828  | 1.08E-12 | increasing     | 0          |
| <i>LOC103220457</i> | Caudate | 9.17E-09   | 0.000622  | 4.50E-06 | increasing     | 0          |
| <i>LOC103220496</i> | Caudate | 1.43E-07   | -0.00072  | 1.32E-07 | decreasing     | 0          |
| <i>LOC103220516</i> | Caudate | 2.30E-07   | 0.000633  | 2.77E-06 | increasing     | 0          |
| <i>LOC103221007</i> | Caudate | 3.49E-22   | 0.000907  | 1.91E-14 | increasing     | 0          |
| <i>LOC103221019</i> | Caudate | 3.46E-08   | -0.00023  | 0.125455 | other          | 0          |
| <i>LOC103221138</i> | Caudate | 6.84E-10   | 0.000834  | 4.45E-11 | increasing     | 1          |
| <i>LOC103221185</i> | Caudate | 4.45E-09   | -0.00055  | 9.06E-05 | decreasing     | 0          |
| <i>LOC103221248</i> | Caudate | 4.53E-09   | -0.0004   | 0.007863 | other          | 0          |
| <i>LOC103221263</i> | Caudate | 1.59E-06   | 0.000706  | 7.39E-08 | increasing     | 0          |
| <i>LOC103221272</i> | Caudate | 5.69E-09   | 6.24E-05  | 0.67629  | other          | 0          |
| <i>LOC103221287</i> | Caudate | 3.45E-12   | -0.0008   | 2.63E-10 | decreasing     | 0          |
| <i>LOC103221288</i> | Caudate | 4.49E-08   | -0.00066  | 1.33E-06 | decreasing     | 0          |
| <i>LOC103221289</i> | Caudate | 1.13E-07   | -0.0007   | 3.63E-07 | decreasing     | 0          |

**Supplementary Table 9. Genes with a significant age effect from either ANOVA or linear regression. Beta is the regression coefficient, Pval is the p-value for the regression coefficient of expression on age (in days). Effect category is increasing if beta is positive and significant, decreasing if beta is negative and significant, and other if the ANOVA were significant rather than the linear regression. Local eQTL is 1 if the gene had a significant local eQTL**

| Gene         | Tissue  | Anova.pval | Beta     | Pval     | EffectCategory | Local eQTL |
|--------------|---------|------------|----------|----------|----------------|------------|
| LOC103221290 | Caudate | 5.72E-11   | -0.00073 | 2.27E-08 | decreasing     | 0          |
| LOC103221330 | Caudate | 2.06E-08   | -0.00056 | 8.68E-05 | decreasing     | 0          |
| LOC103221414 | Caudate | 1.82E-07   | 0.000338 | 0.021972 | other          | 0          |
| LOC103221628 | Caudate | 1.32E-07   | -0.00055 | 0.00011  | other          | 0          |
| LOC103221735 | Caudate | 1.03E-08   | 0.000812 | 3.90E-10 | increasing     | 0          |
| LOC103221855 | Caudate | 5.54E-06   | 0.000696 | 1.65E-07 | increasing     | 0          |
| LOC103221863 | Caudate | 1.39E-07   | 0.000634 | 3.23E-06 | increasing     | 1          |
| LOC103221933 | Caudate | 4.11E-12   | -0.00071 | 4.68E-08 | decreasing     | 0          |
| LOC103221935 | Caudate | 8.06E-09   | -0.00061 | 6.89E-06 | decreasing     | 0          |
| LOC103221937 | Caudate | 3.24E-08   | -0.00051 | 0.000406 | other          | 1          |
| LOC103221943 | Caudate | 1.33E-09   | -0.00067 | 5.69E-07 | decreasing     | 0          |
| LOC103221944 | Caudate | 1.20E-13   | -0.00078 | 7.69E-10 | decreasing     | 0          |
| LOC103221945 | Caudate | 7.75E-09   | -0.00066 | 1.13E-06 | decreasing     | 0          |
| LOC103221946 | Caudate | 1.86E-07   | -0.0005  | 0.00034  | other          | 1          |
| LOC103221996 | Caudate | 2.65E-10   | -0.00071 | 6.84E-08 | decreasing     | 1          |
| LOC103221997 | Caudate | 4.84E-11   | -0.00077 | 2.71E-09 | decreasing     | 0          |
| LOC103221998 | Caudate | 1.88E-12   | -0.0008  | 2.58E-10 | decreasing     | 0          |
| LOC103222001 | Caudate | 3.20E-14   | -0.00087 | 5.08E-13 | decreasing     | 0          |
| LOC103222003 | Caudate | 6.77E-13   | -0.00081 | 1.11E-10 | decreasing     | 0          |
| LOC103222004 | Caudate | 4.98E-09   | -0.0007  | 1.31E-07 | decreasing     | 0          |
| LOC103222006 | Caudate | 8.38E-14   | -0.00083 | 2.69E-11 | decreasing     | 0          |
| LOC103222008 | Caudate | 9.86E-08   | -0.00042 | 0.003396 | other          | 0          |
| LOC103222018 | Caudate | 1.39E-11   | -0.00068 | 4.00E-07 | decreasing     | 0          |
| LOC103222019 | Caudate | 9.81E-08   | -0.00057 | 4.68E-05 | decreasing     | 0          |
| LOC103222069 | Caudate | 1.48E-07   | 0.000649 | 2.89E-06 | increasing     | 0          |
| LOC103222075 | Caudate | 1.36E-17   | -0.00085 | 2.31E-12 | decreasing     | 0          |
| LOC103222076 | Caudate | 6.03E-09   | -0.00071 | 9.29E-08 | decreasing     | 0          |
| LOC103222080 | Caudate | 1.15E-13   | -0.00083 | 5.79E-11 | decreasing     | 0          |
| LOC103222083 | Caudate | 1.18E-15   | 0.000809 | 1.50E-10 | increasing     | 0          |
| LOC103222091 | Caudate | 3.49E-08   | 0.000648 | 3.26E-06 | increasing     | 1          |
| LOC103222183 | Caudate | 1.23E-11   | -0.0008  | 2.95E-10 | decreasing     | 0          |
| LOC103222354 | Caudate | 2.38E-07   | 0.000626 | 5.49E-06 | increasing     | 0          |
| LOC103222369 | Caudate | 1.49E-11   | -0.00062 | 5.77E-06 | decreasing     | 0          |
| LOC103222373 | Caudate | 2.01E-11   | -0.00075 | 4.78E-09 | decreasing     | 0          |
| LOC103222375 | Caudate | 4.46E-10   | 0.0007   | 9.11E-09 | increasing     | 0          |
| LOC103222429 | Caudate | 1.61E-08   | -0.00045 | 0.001477 | other          | 1          |
| LOC103222460 | Caudate | 8.49E-07   | 0.000613 | 1.83E-07 | increasing     | 0          |
| LOC103222548 | Caudate | 6.77E-11   | 0.000793 | 7.39E-10 | increasing     | 0          |
| LOC103222593 | Caudate | 2.05E-09   | 0.000696 | 1.88E-07 | increasing     | 0          |
| LOC103222617 | Caudate | 1.01E-07   | -0.00057 | 3.05E-05 | decreasing     | 0          |

**Supplementary Table 9. Genes with a significant age effect from either ANOVA or linear regression. Beta is the regression coefficient, Pval is the p-value for the regression coefficient of expression on age (in days). Effect category is increasing if beta is positive and significant, decreasing if beta is negative and significant, and other if the ANOVA were significant rather than the linear regression. Local eQTL is 1 if the gene had a significant local eQTL**

| Gene         | Tissue  | Anova.pval | Beta      | Pval     | EffectCategory | Local eQTL |
|--------------|---------|------------|-----------|----------|----------------|------------|
| LOC103222895 | Caudate | 1.02E-08   | 0.000718  | 1.42E-07 | increasing     | 0          |
| LOC103222898 | Caudate | 2.74E-11   | 0.000771  | 6.48E-10 | increasing     | 0          |
| LOC103223006 | Caudate | 5.56E-10   | 0.000163  | 0.277883 | other          | 0          |
| LOC103223027 | Caudate | 2.73E-09   | 1.10E-05  | 0.93661  | other          | 0          |
| LOC103223065 | Caudate | 1.21E-11   | 0.000327  | 0.027338 | other          | 0          |
| LOC103223096 | Caudate | 5.48E-10   | 0.000762  | 9.22E-09 | increasing     | 0          |
| LOC103223099 | Caudate | 3.04E-13   | 0.000804  | 7.78E-10 | increasing     | 0          |
| LOC103223109 | Caudate | 9.06E-14   | -0.00088  | 1.05E-12 | decreasing     | 0          |
| LOC103223177 | Caudate | 4.56E-08   | -0.00061  | 1.86E-05 | decreasing     | 0          |
| LOC103223180 | Caudate | 2.29E-11   | 0.000653  | 1.13E-06 | increasing     | 0          |
| LOC103223222 | Caudate | 9.00E-11   | 0.000496  | 0.000634 | other          | 0          |
| LOC103223292 | Caudate | 3.36E-08   | -0.00048  | 0.000765 | other          | 0          |
| LOC103223382 | Caudate | 1.41E-07   | 0.000508  | 0.000483 | other          | 0          |
| LOC103223422 | Caudate | 4.82E-10   | 0.000154  | 0.311184 | other          | 0          |
| LOC103223510 | Caudate | 9.44E-09   | 0.000739  | 4.54E-08 | increasing     | 0          |
| LOC103223548 | Caudate | 5.61E-12   | 0.000664  | 1.78E-06 | increasing     | 0          |
| LOC103223549 | Caudate | 1.17E-08   | 0.000143  | 0.335261 | other          | 0          |
| LOC103223605 | Caudate | 1.00E-10   | 0.000699  | 3.55E-07 | increasing     | 0          |
| LOC103223633 | Caudate | 3.56E-14   | -0.00074  | 1.87E-08 | decreasing     | 0          |
| LOC103223640 | Caudate | 1.07E-08   | 0.000562  | 9.15E-05 | increasing     | 0          |
| LOC103223656 | Caudate | 1.47E-12   | -0.00072  | 7.37E-08 | decreasing     | 0          |
| LOC103223660 | Caudate | 2.07E-09   | -0.00072  | 8.86E-08 | decreasing     | 0          |
| LOC103223735 | Caudate | 1.09E-07   | -0.00061  | 1.76E-05 | decreasing     | 0          |
| LOC103224173 | Caudate | 1.94E-10   | 0.00034   | 0.020409 | other          | 0          |
| LOC103224231 | Caudate | 3.16E-15   | 0.000786  | 4.29E-10 | increasing     | 0          |
| LOC103224274 | Caudate | 1.93E-09   | 0.000374  | 0.011269 | other          | 0          |
| LOC103224340 | Caudate | 1.94E-07   | -1.99E-06 | 0.989643 | other          | 0          |
| LOC103224381 | Caudate | 1.58E-09   | -0.00059  | 2.88E-05 | decreasing     | 0          |
| LOC103224382 | Caudate | 2.87E-06   | -0.00073  | 7.20E-08 | decreasing     | 0          |
| LOC103224383 | Caudate | 8.28E-14   | -0.00082  | 1.14E-10 | decreasing     | 0          |
| LOC103224393 | Caudate | 3.46E-08   | 8.16E-05  | 0.564841 | other          | 0          |
| LOC103224431 | Caudate | 5.41E-10   | -0.00073  | 2.14E-08 | decreasing     | 0          |
| LOC103224490 | Caudate | 1.12E-08   | -0.00017  | 0.23691  | other          | 0          |
| LOC103224548 | Caudate | 3.58E-12   | -0.00076  | 1.08E-09 | decreasing     | 0          |
| LOC103224550 | Caudate | 1.98E-20   | -0.00088  | 1.54E-14 | decreasing     | 0          |
| LOC103224552 | Caudate | 7.30E-08   | -0.00055  | 7.62E-05 | decreasing     | 0          |
| LOC103224719 | Caudate | 1.60E-07   | 0.000591  | 1.87E-05 | increasing     | 0          |
| LOC103224734 | Caudate | 1.55E-07   | -0.00068  | 9.22E-07 | decreasing     | 0          |
| LOC103224735 | Caudate | 2.91E-08   | -0.0007   | 2.82E-07 | decreasing     | 0          |
| LOC103224769 | Caudate | 2.18E-08   | -0.00012  | 0.402754 | other          | 0          |

**Supplementary Table 9. Genes with a significant age effect from either ANOVA or linear regression. Beta is the regression coefficient, Pval is the p-value for the regression coefficient of expression on age (in days). Effect category is increasing if beta is positive and significant, decreasing if beta is negative and significant, and other if the ANOVA were significant rather than the linear regression. Local eQTL is 1 if the gene had a significant local eQTL**

| Gene         | Tissue  | Anova.pval | Beta     | Pval     | EffectCategory | Local eQTL |
|--------------|---------|------------|----------|----------|----------------|------------|
| LOC103224848 | Caudate | 2.10E-10   | -0.00013 | 0.383788 | other          | 0          |
| LOC103224870 | Caudate | 9.02E-09   | -0.00019 | 0.206668 | other          | 0          |
| LOC103224888 | Caudate | 4.28E-11   | 6.92E-05 | 0.643359 | other          | 0          |
| LOC103225003 | Caudate | 1.04E-07   | -0.00064 | 3.84E-06 | decreasing     | 0          |
| LOC103225074 | Caudate | 3.05E-10   | 0.000516 | 0.00039  | other          | 0          |
| LOC103225095 | Caudate | 3.68E-08   | 0.000379 | 0.009794 | other          | 0          |
| LOC103225256 | Caudate | 2.51E-07   | 0.000127 | 0.4072   | other          | 0          |
| LOC103225445 | Caudate | 2.16E-07   | -0.0004  | 0.007124 | other          | 1          |
| LOC103225645 | Caudate | 6.57E-10   | 0.000755 | 1.78E-08 | increasing     | 0          |
| LOC103225699 | Caudate | 2.60E-08   | 0.00079  | 2.07E-09 | increasing     | 0          |
| LOC103225785 | Caudate | 6.68E-10   | 0.000439 | 0.002787 | other          | 0          |
| LOC103225786 | Caudate | 1.16E-19   | 0.000897 | 1.14E-13 | increasing     | 0          |
| LOC103225793 | Caudate | 5.75E-11   | 0.000799 | 1.07E-09 | increasing     | 0          |
| LOC103225801 | Caudate | 1.03E-08   | 0.000585 | 3.86E-05 | increasing     | 0          |
| LOC103225812 | Caudate | 2.27E-07   | 0.000324 | 0.030715 | other          | 0          |
| LOC103225882 | Caudate | 1.75E-07   | 0.000682 | 8.05E-07 | increasing     | 0          |
| LOC103225898 | Caudate | 5.27E-09   | 0.00074  | 9.55E-09 | increasing     | 0          |
| LOC103225917 | Caudate | 6.09E-09   | -0.00076 | 1.44E-08 | decreasing     | 0          |
| LOC103225923 | Caudate | 5.30E-10   | 0.000457 | 0.001861 | other          | 0          |
| LOC103225931 | Caudate | 4.20E-08   | 0.000782 | 2.55E-09 | increasing     | 0          |
| LOC103225940 | Caudate | 4.28E-10   | 0.000743 | 2.28E-08 | increasing     | 0          |
| LOC103225953 | Caudate | 3.47E-13   | 0.000625 | 9.26E-06 | increasing     | 0          |
| LOC103225995 | Caudate | 1.14E-09   | 0.000486 | 0.000802 | other          | 0          |
| LOC103226072 | Caudate | 3.33E-09   | 0.000664 | 1.37E-06 | increasing     | 0          |
| LOC103226149 | Caudate | 2.20E-10   | 0.000745 | 3.24E-08 | increasing     | 0          |
| LOC103226304 | Caudate | 7.75E-09   | 0.000583 | 4.13E-05 | increasing     | 0          |
| LOC103226393 | Caudate | 1.21E-08   | 0.000217 | 0.151093 | other          | 0          |
| LOC103226462 | Caudate | 1.69E-10   | 0.000202 | 0.15216  | other          | 0          |
| LOC103226606 | Caudate | 8.92E-08   | -0.0005  | 0.00066  | other          | 0          |
| LOC103226616 | Caudate | 3.52E-08   | -0.00072 | 1.41E-07 | decreasing     | 0          |
| LOC103226617 | Caudate | 2.57E-08   | -0.00076 | 1.16E-08 | decreasing     | 0          |
| LOC103226835 | Caudate | 9.04E-10   | -0.0004  | 0.007321 | other          | 0          |
| LOC103226870 | Caudate | 2.73E-13   | 0.000758 | 6.35E-09 | increasing     | 0          |
| LOC103226908 | Caudate | 2.95E-15   | 0.000856 | 1.12E-12 | increasing     | 0          |
| LOC103226909 | Caudate | 2.06E-07   | 0.000643 | 2.39E-06 | increasing     | 0          |
| LOC103226929 | Caudate | 6.20E-07   | 0.00069  | 1.71E-07 | increasing     | 1          |
| LOC103226962 | Caudate | 7.40E-08   | 0.000676 | 7.80E-07 | increasing     | 0          |
| LOC103227009 | Caudate | 6.58E-11   | -0.00052 | 0.000254 | other          | 0          |
| LOC103227062 | Caudate | 2.38E-06   | 0.000696 | 2.19E-07 | increasing     | 0          |
| LOC103227066 | Caudate | 4.39E-08   | 0.000735 | 1.33E-08 | increasing     | 0          |

**Supplementary Table 9. Genes with a significant age effect from either ANOVA or linear regression. Beta is the regression coefficient, Pval is the p-value for the regression coefficient of expression on age (in days). Effect category is increasing if beta is positive and significant, decreasing if beta is negative and significant, and other if the ANOVA were significant rather than the linear regression. Local eQTL is 1 if the gene had a significant local eQTL**

| Gene         | Tissue  | Anova.pval | Beta     | Pval     | EffectCategory | Local eQTL |
|--------------|---------|------------|----------|----------|----------------|------------|
| LOC103227172 | Caudate | 6.96E-09   | -0.0008  | 9.20E-10 | decreasing     | 0          |
| LOC103227190 | Caudate | 2.75E-11   | 0.000401 | 0.005494 | other          | 0          |
| LOC103227191 | Caudate | 3.37E-12   | 0.000399 | 0.005807 | other          | 0          |
| LOC103227289 | Caudate | 7.08E-08   | 0.000577 | 4.93E-05 | increasing     | 0          |
| LOC103227297 | Caudate | 1.18E-12   | -0.00055 | 0.000144 | other          | 0          |
| LOC103227322 | Caudate | 1.11E-09   | 0.00082  | 2.51E-10 | increasing     | 1          |
| LOC103227371 | Caudate | 4.20E-08   | 0.00072  | 6.18E-08 | increasing     | 0          |
| LOC103227383 | Caudate | 2.33E-10   | 0.000304 | 0.043909 | other          | 0          |
| LOC103227384 | Caudate | 1.43E-07   | -0.0006  | 1.12E-05 | decreasing     | 0          |
| LOC103227395 | Caudate | 6.34E-07   | -0.00076 | 9.68E-09 | decreasing     | 0          |
| LOC103227411 | Caudate | 4.48E-10   | 0.000626 | 7.49E-06 | increasing     | 0          |
| LOC103227597 | Caudate | 7.76E-08   | 0.000249 | 0.099012 | other          | 0          |
| LOC103227720 | Caudate | 1.76E-07   | 0.000293 | 0.051403 | other          | 0          |
| LOC103227757 | Caudate | 1.12E-07   | -0.00059 | 2.49E-05 | decreasing     | 0          |
| LOC103227769 | Caudate | 1.63E-09   | -0.00059 | 3.30E-05 | decreasing     | 0          |
| LOC103227802 | Caudate | 7.67E-08   | 0.000561 | 3.85E-05 | increasing     | 0          |
| LOC103227848 | Caudate | 1.51E-08   | 0.000767 | 3.54E-09 | increasing     | 0          |
| LOC103227928 | Caudate | 4.28E-10   | -0.0008  | 6.70E-10 | decreasing     | 0          |
| LOC103227940 | Caudate | 7.75E-08   | -0.00026 | 0.069618 | other          | 0          |
| LOC103227957 | Caudate | 2.73E-06   | 0.000705 | 2.46E-07 | increasing     | 0          |
| LOC103228076 | Caudate | 4.26E-08   | 0.000325 | 0.025375 | other          | 0          |
| LOC103228084 | Caudate | 2.06E-08   | 0.000158 | 0.302488 | other          | 0          |
| LOC103228153 | Caudate | 2.89E-11   | -0.00082 | 2.30E-10 | decreasing     | 0          |
| LOC103228253 | Caudate | 7.59E-07   | -0.0007  | 2.22E-07 | decreasing     | 0          |
| LOC103228260 | Caudate | 2.05E-07   | -0.00072 | 9.89E-08 | decreasing     | 0          |
| LOC103228264 | Caudate | 1.59E-08   | -0.00075 | 2.82E-08 | decreasing     | 0          |
| LOC103228267 | Caudate | 4.39E-10   | -0.00075 | 2.85E-08 | decreasing     | 0          |
| LOC103228268 | Caudate | 3.62E-08   | -0.00065 | 3.32E-06 | decreasing     | 0          |
| LOC103228271 | Caudate | 1.96E-07   | -0.00067 | 1.24E-06 | decreasing     | 0          |
| LOC103228278 | Caudate | 1.25E-07   | -0.00068 | 6.53E-07 | decreasing     | 0          |
| LOC103228401 | Caudate | 2.79E-08   | -0.00071 | 2.24E-07 | decreasing     | 0          |
| LOC103228405 | Caudate | 3.11E-09   | -0.00076 | 1.35E-08 | decreasing     | 0          |
| LOC103228553 | Caudate | 8.09E-10   | -0.00068 | 8.89E-07 | decreasing     | 0          |
| LOC103228595 | Caudate | 1.15E-07   | -0.00076 | 1.55E-08 | decreasing     | 0          |
| LOC103228599 | Caudate | 2.06E-07   | -0.00074 | 4.87E-08 | decreasing     | 0          |
| LOC103228601 | Caudate | 3.05E-08   | -0.00076 | 1.80E-08 | decreasing     | 0          |
| LOC103228603 | Caudate | 2.17E-07   | -0.00071 | 2.47E-07 | decreasing     | 1          |
| LOC103228604 | Caudate | 6.77E-08   | -0.00076 | 1.28E-08 | decreasing     | 0          |
| LOC103228606 | Caudate | 5.03E-08   | -0.00073 | 5.67E-08 | decreasing     | 1          |
| LOC103228607 | Caudate | 2.33E-13   | -0.00084 | 1.82E-11 | decreasing     | 0          |

**Supplementary Table 9. Genes with a significant age effect from either ANOVA or linear regression. Beta is the regression coefficient, Pval is the p-value for the regression coefficient of expression on age (in days). Effect category is increasing if beta is positive and significant, decreasing if beta is negative and significant, and other if the ANOVA were significant rather than the linear regression. Local eQTL is 1 if the gene had a significant local eQTL**

| Gene         | Tissue  | Anova.pval | Beta      | Pval     | EffectCategory | Local eQTL |
|--------------|---------|------------|-----------|----------|----------------|------------|
| LOC103228608 | Caudate | 1.10E-09   | -0.00081  | 2.94E-10 | decreasing     | 0          |
| LOC103228609 | Caudate | 5.05E-10   | -0.00078  | 1.80E-09 | decreasing     | 0          |
| LOC103228627 | Caudate | 1.14E-08   | 0.000153  | 0.316032 | other          | 0          |
| LOC103228672 | Caudate | 2.29E-08   | 0.000203  | 0.16235  | other          | 0          |
| LOC103228761 | Caudate | 1.95E-05   | -0.00072  | 1.18E-07 | decreasing     | 0          |
| LOC103228824 | Caudate | 5.59E-11   | -0.00025  | 0.096298 | other          | 0          |
| LOC103228952 | Caudate | 6.30E-11   | 0.000604  | 1.89E-05 | increasing     | 0          |
| LOC103228978 | Caudate | 2.10E-10   | -6.20E-05 | 0.676121 | other          | 0          |
| LOC103229131 | Caudate | 1.51E-07   | 0.000658  | 1.21E-06 | increasing     | 0          |
| LOC103229137 | Caudate | 9.07E-15   | -0.00085  | 2.67E-12 | decreasing     | 0          |
| LOC103229191 | Caudate | 2.64E-06   | -0.00071  | 9.50E-08 | decreasing     | 0          |
| LOC103229306 | Caudate | 1.86E-10   | -8.39E-05 | 0.57461  | other          | 0          |
| LOC103229364 | Caudate | 3.77E-08   | 2.94E-05  | 0.848308 | other          | 0          |
| LOC103229412 | Caudate | 4.65E-08   | -0.00073  | 8.15E-08 | decreasing     | 0          |
| LOC103229417 | Caudate | 5.60E-08   | -0.00076  | 6.88E-09 | decreasing     | 0          |
| LOC103229418 | Caudate | 1.29E-09   | -0.00081  | 4.46E-10 | decreasing     | 0          |
| LOC103229420 | Caudate | 1.16E-06   | -0.00072  | 1.58E-07 | decreasing     | 0          |
| LOC103229423 | Caudate | 5.37E-07   | -0.0007   | 2.15E-07 | decreasing     | 0          |
| LOC103229426 | Caudate | 1.48E-07   | -0.00058  | 5.81E-05 | decreasing     | 0          |
| LOC103229468 | Caudate | 2.84E-10   | -0.00076  | 5.58E-09 | decreasing     | 0          |
| LOC103229472 | Caudate | 3.07E-09   | -0.0008   | 3.19E-10 | decreasing     | 0          |
| LOC103229682 | Caudate | 5.82E-08   | 0.000568  | 2.94E-05 | increasing     | 0          |
| LOC103229733 | Caudate | 1.13E-09   | 0.000704  | 1.87E-07 | increasing     | 0          |
| LOC103229888 | Caudate | 2.25E-08   | 0.000406  | 0.005783 | other          | 0          |
| LOC103229956 | Caudate | 7.14E-09   | 0.00073   | 2.40E-08 | increasing     | 0          |
| LOC103229957 | Caudate | 8.22E-08   | 0.000669  | 6.29E-07 | increasing     | 0          |
| LOC103229961 | Caudate | 5.17E-08   | 0.000784  | 2.58E-09 | increasing     | 0          |
| LOC103229978 | Caudate | 7.27E-09   | -0.00068  | 3.63E-07 | decreasing     | 0          |
| LOC103230040 | Caudate | 2.90E-09   | -0.00029  | 0.056865 | other          | 0          |
| LOC103230295 | Caudate | 1.18E-10   | 0.000522  | 0.000228 | other          | 0          |
| LOC103230307 | Caudate | 2.83E-08   | 0.00057   | 3.59E-05 | increasing     | 1          |
| LOC103230353 | Caudate | 5.70E-08   | 0.000631  | 4.80E-06 | increasing     | 1          |
| LOC103230361 | Caudate | 1.17E-06   | -0.00071  | 1.27E-07 | decreasing     | 0          |
| LOC103230378 | Caudate | 1.47E-10   | 0.0002    | 0.184948 | other          | 0          |
| LOC103230493 | Caudate | 1.23E-10   | 0.000449  | 0.002064 | other          | 0          |
| LOC103230509 | Caudate | 1.22E-08   | 0.000192  | 0.20852  | other          | 0          |
| LOC103230659 | Caudate | 3.52E-08   | -0.00038  | 0.009592 | other          | 0          |
| LOC103230736 | Caudate | 1.20E-08   | 0.000637  | 3.22E-06 | increasing     | 0          |
| LOC103230770 | Caudate | 5.29E-08   | 0.00052   | 0.000255 | other          | 0          |
| LOC103230800 | Caudate | 4.40E-11   | -0.00073  | 3.87E-08 | decreasing     | 1          |

**Supplementary Table 9. Genes with a significant age effect from either ANOVA or linear regression. Beta is the regression coefficient, Pval is the p-value for the regression coefficient of expression on age (in days). Effect category is increasing if beta is positive and significant, decreasing if beta is negative and significant, and other if the ANOVA were significant rather than the linear regression. Local eQTL is 1 if the gene had a significant local eQTL**

| Gene         | Tissue  | Anova.pval | Beta      | Pval     | EffectCategory | Local eQTL |
|--------------|---------|------------|-----------|----------|----------------|------------|
| LOC103230894 | Caudate | 2.44E-07   | -0.00057  | 5.38E-05 | decreasing     | 0          |
| LOC103230939 | Caudate | 2.31E-07   | 8.58E-05  | 0.565749 | other          | 0          |
| LOC103230993 | Caudate | 1.99E-07   | 0.000653  | 7.42E-07 | increasing     | 1          |
| LOC103231026 | Caudate | 2.62E-10   | 0.000538  | 0.000143 | other          | 0          |
| LOC103231051 | Caudate | 2.38E-10   | -6.99E-05 | 0.643787 | other          | 0          |
| LOC103231081 | Caudate | 1.01E-05   | -0.00074  | 2.89E-08 | decreasing     | 0          |
| LOC103231084 | Caudate | 4.03E-08   | -0.00046  | 0.001609 | other          | 0          |
| LOC103231096 | Caudate | 4.05E-19   | 0.00091   | 3.81E-14 | increasing     | 0          |
| LOC103231101 | Caudate | 7.08E-08   | 0.000741  | 5.26E-09 | increasing     | 0          |
| LOC103231220 | Caudate | 6.87E-10   | 0.000366  | 0.011203 | other          | 0          |
| LOC103231470 | Caudate | 1.82E-08   | 0.000567  | 4.03E-05 | increasing     | 0          |
| LOC103231548 | Caudate | 8.97E-20   | -0.0009   | 3.37E-14 | decreasing     | 0          |
| LOC103231594 | Caudate | 2.72E-11   | -0.00082  | 1.43E-10 | decreasing     | 0          |
| LOC103231695 | Caudate | 9.96E-09   | 0.000509  | 0.000462 | other          | 0          |
| LOC103231767 | Caudate | 2.54E-09   | 0.000569  | 7.33E-05 | increasing     | 0          |
| LOC103231791 | Caudate | 2.62E-08   | -0.00065  | 1.34E-06 | decreasing     | 0          |
| LOC103231911 | Caudate | 8.50E-08   | 0.000556  | 0.000105 | other          | 0          |
| LOC103231930 | Caudate | 8.03E-09   | 0.000726  | 8.13E-08 | increasing     | 0          |
| LOC103231962 | Caudate | 5.25E-09   | 0.000589  | 3.16E-05 | increasing     | 0          |
| LOC103232041 | Caudate | 3.74E-10   | 7.43E-05  | 0.628175 | other          | 0          |
| LOC103232058 | Caudate | 2.85E-08   | -0.00054  | 0.00017  | other          | 0          |
| LOC103232061 | Caudate | 2.84E-10   | -0.00078  | 7.40E-10 | decreasing     | 0          |
| LOC103232102 | Caudate | 1.79E-07   | -0.00011  | 0.444075 | other          | 0          |
| LOC103232103 | Caudate | 1.53E-11   | -0.00038  | 0.010422 | other          | 0          |
| LOC103232182 | Caudate | 2.79E-08   | -0.00013  | 0.408963 | other          | 0          |
| LOC103232225 | Caudate | 9.43E-09   | 0.000477  | 0.000804 | other          | 0          |
| LOC103232226 | Caudate | 3.44E-09   | -0.00012  | 0.408521 | other          | 0          |
| LOC103232235 | Caudate | 1.10E-07   | -0.00036  | 0.016422 | other          | 0          |
| LOC103232291 | Caudate | 3.15E-09   | 0.000333  | 0.025601 | other          | 0          |
| LOC103232311 | Caudate | 1.38E-08   | -0.00066  | 1.31E-06 | decreasing     | 0          |
| LOC103232315 | Caudate | 7.78E-08   | -5.13E-05 | 0.735779 | other          | 0          |
| LOC103232394 | Caudate | 7.16E-16   | 0.000881  | 8.20E-13 | increasing     | 0          |
| LOC103232411 | Caudate | 1.01E-11   | 0.00013   | 0.375566 | other          | 0          |
| LOC103232479 | Caudate | 4.29E-08   | 0.000176  | 0.250353 | other          | 0          |
| LOC103232497 | Caudate | 2.76E-09   | -0.00036  | 0.017485 | other          | 0          |
| LOC103232526 | Caudate | 3.74E-10   | 0.000761  | 5.16E-09 | increasing     | 0          |
| LOC103232528 | Caudate | 1.91E-11   | 0.000388  | 0.009207 | other          | 0          |
| LOC103232553 | Caudate | 2.18E-07   | 0.000581  | 3.78E-05 | increasing     | 0          |
| LOC103232574 | Caudate | 4.20E-10   | -2.65E-05 | 0.859458 | other          | 0          |
| LOC103232592 | Caudate | 1.12E-10   | -0.00076  | 4.44E-09 | decreasing     | 0          |



**Supplementary Table 9. Genes with a significant age effect from either ANOVA or linear regression. Beta is the regression coefficient, Pval is the p-value for the regression coefficient of expression on age (in days). Effect category is increasing if beta is positive and significant, decreasing if beta is negative and significant, and other if the ANOVA were significant rather than the linear regression. Local eQTL is 1 if the gene had a significant local eQTL**

| Gene         | Tissue  | Anova.pval | Beta      | Pval     | EffectCategory | Local eQTL |
|--------------|---------|------------|-----------|----------|----------------|------------|
| LOC103232593 | Caudate | 4.93E-10   | -0.00076  | 8.13E-09 | decreasing     | 0          |
| LOC103232616 | Caudate | 5.15E-13   | 0.000463  | 0.001263 | other          | 0          |
| LOC103232654 | Caudate | 3.26E-09   | 0.000322  | 0.032239 | other          | 0          |
| LOC103232789 | Caudate | 7.44E-08   | 0.00049   | 0.00079  | other          | 0          |
| LOC103232897 | Caudate | 2.46E-08   | 0.000151  | 0.321459 | other          | 0          |
| LOC103232907 | Caudate | 9.13E-09   | 0.000489  | 0.000605 | other          | 0          |
| LOC103232958 | Caudate | 1.32E-07   | 8.17E-05  | 0.582482 | other          | 0          |
| LOC103232974 | Caudate | 1.10E-09   | -0.00074  | 3.05E-08 | decreasing     | 0          |
| LOC103233030 | Caudate | 1.43E-10   | 0.000797  | 1.07E-09 | increasing     | 0          |
| LOC103233032 | Caudate | 1.64E-09   | 0.000725  | 1.74E-08 | increasing     | 0          |
| LOC103233100 | Caudate | 1.62E-07   | -0.00011  | 0.46937  | other          | 0          |
| LOC103233139 | Caudate | 7.33E-13   | 0.000287  | 0.053255 | other          | 0          |
| LOC103233150 | Caudate | 2.06E-07   | 0.000319  | 0.032834 | other          | 0          |
| LOC103233400 | Caudate | 1.25E-13   | -7.82E-05 | 0.600637 | other          | 0          |
| LOC103233443 | Caudate | 1.68E-06   | 0.000631  | 5.92E-08 | increasing     | 0          |
| LOC103233444 | Caudate | 5.22E-15   | 0.000885  | 3.01E-13 | increasing     | 0          |
| LOC103233451 | Caudate | 2.02E-10   | 0.000626  | 8.92E-06 | increasing     | 0          |
| LOC103233496 | Caudate | 1.32E-10   | -0.00029  | 0.049291 | other          | 0          |
| LOC103233501 | Caudate | 8.92E-09   | 0.000626  | 4.56E-06 | increasing     | 0          |
| LOC103233511 | Caudate | 2.01E-07   | 0.000653  | 1.59E-06 | increasing     | 0          |
| LOC103233547 | Caudate | 1.21E-09   | 0.000812  | 9.32E-11 | increasing     | 0          |
| LOC103233554 | Caudate | 1.27E-09   | 0.000795  | 4.58E-10 | increasing     | 0          |
| LOC103233575 | Caudate | 1.54E-10   | 0.000222  | 0.138875 | other          | 0          |
| LOC103233604 | Caudate | 4.07E-11   | 0.000372  | 0.0105   | other          | 0          |
| LOC103233701 | Caudate | 1.25E-08   | 0.000419  | 0.004088 | other          | 0          |
| LOC103233755 | Caudate | 2.53E-07   | 0.000519  | 0.000315 | other          | 0          |
| LOC103233841 | Caudate | 7.43E-08   | 0.000696  | 1.91E-07 | increasing     | 0          |
| LOC103234031 | Caudate | 2.26E-10   | 0.000578  | 2.00E-05 | increasing     | 0          |
| LOC103234124 | Caudate | 6.77E-10   | 0.000518  | 0.000332 | other          | 0          |
| LOC103234134 | Caudate | 1.71E-07   | 0.000481  | 0.001032 | other          | 0          |
| LOC103234241 | Caudate | 1.15E-08   | -0.00059  | 2.25E-05 | decreasing     | 0          |
| LOC103234252 | Caudate | 5.21E-07   | 0.000747  | 3.56E-09 | increasing     | 0          |
| LOC103234255 | Caudate | 9.26E-11   | -0.00075  | 1.12E-08 | decreasing     | 0          |
| LOC103234265 | Caudate | 3.22E-09   | -0.00075  | 1.40E-08 | decreasing     | 0          |
| LOC103234282 | Caudate | 1.22E-05   | 0.000693  | 3.33E-08 | increasing     | 0          |
| LOC103234302 | Caudate | 7.13E-08   | -0.00055  | 8.10E-05 | decreasing     | 0          |
| LOC103234347 | Caudate | 5.69E-08   | -1.73E-05 | 0.908159 | other          | 0          |
| LOC103234348 | Caudate | 6.87E-11   | 0.000664  | 6.47E-07 | increasing     | 0          |
| LOC103234372 | Caudate | 2.62E-07   | 0.000722  | 7.95E-08 | increasing     | 0          |
| LOC103234380 | Caudate | 2.71E-08   | 1.87E-05  | 0.901698 | other          | 0          |

**Supplementary Table 9. Genes with a significant age effect from either ANOVA or linear regression. Beta is the regression coefficient, Pval is the p-value for the regression coefficient of expression on age (in days). Effect category is increasing if beta is positive and significant, decreasing if beta is negative and significant, and other if the ANOVA were significant rather than the linear regression. Local eQTL is 1 if the gene had a significant local eQTL**

| Gene                | Tissue  | Anova.pval | Beta      | Pval     | EffectCategory | Local eQTL |
|---------------------|---------|------------|-----------|----------|----------------|------------|
| <i>LOC103234406</i> | Caudate | 1.21E-08   | -0.00035  | 0.016367 | other          | 0          |
| <i>LOC103234416</i> | Caudate | 1.11E-12   | 0.000819  | 3.35E-11 | increasing     | 0          |
| <i>LOC103234419</i> | Caudate | 1.51E-16   | 0.000841  | 8.11E-12 | increasing     | 0          |
| <i>LOC103234469</i> | Caudate | 1.62E-07   | 0.000746  | 1.33E-08 | increasing     | 0          |
| <i>LOC103234470</i> | Caudate | 8.68E-10   | 0.00065   | 2.99E-06 | increasing     | 0          |
| <i>LOC103234473</i> | Caudate | 2.32E-07   | -0.00071  | 9.61E-08 | decreasing     | 0          |
| <i>LOC103234475</i> | Caudate | 2.23E-07   | -0.00074  | 1.10E-08 | decreasing     | 0          |
| <i>LOC103234505</i> | Caudate | 6.29E-08   | 0.000633  | 4.10E-06 | increasing     | 0          |
| <i>LOC103234618</i> | Caudate | 3.27E-13   | -0.00083  | 2.57E-11 | decreasing     | 0          |
| <i>LOC103234653</i> | Caudate | 5.11E-08   | 0.000189  | 0.208134 | other          | 0          |
| <i>LOC103234898</i> | Caudate | 2.65E-08   | -5.81E-05 | 0.692228 | other          | 0          |
| <i>LOC103234934</i> | Caudate | 1.26E-10   | 1.21E-05  | 0.936815 | other          | 0          |
| <i>LOC103234950</i> | Caudate | 1.82E-06   | 0.000741  | 3.95E-08 | increasing     | 0          |
| <i>LOC103234986</i> | Caudate | 1.22E-09   | 0.000716  | 4.13E-08 | increasing     | 0          |
| <i>LOC103234988</i> | Caudate | 4.56E-12   | 0.000782  | 1.09E-09 | increasing     | 0          |
| <i>LOC103235079</i> | Caudate | 2.61E-09   | 0.00035   | 0.016533 | other          | 0          |
| <i>LOC103235442</i> | Caudate | 2.25E-07   | 0.000228  | 0.126106 | other          | 0          |
| <i>LOC103235452</i> | Caudate | 6.45E-11   | 0.000514  | 0.000404 | other          | 0          |
| <i>LOC103235514</i> | Caudate | 2.50E-07   | -0.0006   | 1.42E-05 | decreasing     | 0          |
| <i>LOC103235525</i> | Caudate | 5.03E-06   | 0.000741  | 4.00E-08 | increasing     | 0          |
| <i>LOC103235590</i> | Caudate | 5.48E-08   | -0.00028  | 0.043795 | other          | 0          |
| <i>LOC103235597</i> | Caudate | 1.58E-09   | -0.00055  | 9.05E-05 | decreasing     | 0          |
| <i>LOC103235629</i> | Caudate | 2.20E-07   | -0.00023  | 0.129523 | other          | 0          |
| <i>LOC103235723</i> | Caudate | 3.10E-09   | 0.000181  | 0.232403 | other          | 0          |
| <i>LOC103235802</i> | Caudate | 4.72E-05   | -0.0007   | 1.60E-07 | decreasing     | 0          |
| <i>LOC103235911</i> | Caudate | 3.99E-08   | 0.000563  | 8.47E-05 | increasing     | 0          |
| <i>LOC103235940</i> | Caudate | 4.59E-08   | 0.000562  | 4.80E-05 | increasing     | 0          |
| <i>LOC103236025</i> | Caudate | 5.46E-08   | 0.000524  | 0.000141 | other          | 0          |
| <i>LOC103236032</i> | Caudate | 3.65E-08   | -0.00038  | 0.008936 | other          | 0          |
| <i>LOC103236037</i> | Caudate | 4.26E-08   | -0.00056  | 9.40E-05 | decreasing     | 0          |
| <i>LOC103236164</i> | Caudate | 3.11E-10   | -0.00021  | 0.161073 | other          | 0          |
| <i>LOC103236167</i> | Caudate | 3.37E-09   | 0.000677  | 6.61E-07 | increasing     | 0          |
| <i>LOC103236536</i> | Caudate | 1.53E-07   | 0.000609  | 1.09E-05 | increasing     | 0          |
| <i>LOC103236776</i> | Caudate | 7.71E-10   | 0.000753  | 1.07E-08 | increasing     | 0          |
| <i>LOC103236781</i> | Caudate | 1.22E-09   | -0.00053  | 0.000188 | other          | 0          |
| <i>LOC103236784</i> | Caudate | 2.31E-12   | 0.0008    | 2.28E-10 | increasing     | 0          |
| <i>LOC103236856</i> | Caudate | 2.13E-08   | 0.000501  | 0.000578 | other          | 0          |
| <i>LOC103236915</i> | Caudate | 5.69E-08   | 0.000524  | 0.000198 | other          | 1          |
| <i>LOC103236916</i> | Caudate | 2.26E-08   | 0.000137  | 0.355118 | other          | 1          |
| <i>LOC103236962</i> | Caudate | 9.84E-10   | -0.00073  | 3.80E-08 | decreasing     | 0          |

**Supplementary Table 9. Genes with a significant age effect from either ANOVA or linear regression. Beta is the regression coefficient, Pval is the p-value for the regression coefficient of expression on age (in days). Effect category is increasing if beta is positive and significant, decreasing if beta is negative and significant, and other if the ANOVA were significant rather than the linear regression. Local eQTL is 1 if the gene had a significant local eQTL**

| Gene                | Tissue  | Anova.pval | Beta      | Pval     | EffectCategory | Local eQTL |
|---------------------|---------|------------|-----------|----------|----------------|------------|
| <i>LOC103236980</i> | Caudate | 1.42E-07   | -1.65E-05 | 0.911363 | other          | 0          |
| <i>LOC103237093</i> | Caudate | 8.40E-12   | -0.00074  | 1.94E-08 | decreasing     | 0          |
| <i>LOC103237228</i> | Caudate | 1.66E-07   | 0.00017   | 0.263    | other          | 0          |
| <i>LOC103237276</i> | Caudate | 5.54E-10   | -7.58E-05 | 0.617955 | other          | 0          |
| <i>LOC103237309</i> | Caudate | 1.71E-07   | -0.00073  | 9.09E-08 | decreasing     | 0          |
| <i>LOC103237319</i> | Caudate | 1.52E-07   | -0.00063  | 6.53E-06 | decreasing     | 0          |
| <i>LOC103237355</i> | Caudate | 4.78E-09   | -0.00063  | 6.41E-06 | decreasing     | 0          |
| <i>LOC103237383</i> | Caudate | 6.33E-11   | -0.00081  | 6.54E-10 | decreasing     | 0          |
| <i>LOC103237511</i> | Caudate | 1.06E-16   | 0.000758  | 5.54E-09 | increasing     | 0          |
| <i>LOC103237514</i> | Caudate | 6.25E-08   | 0.000134  | 0.374881 | other          | 0          |
| <i>LOC103237527</i> | Caudate | 8.39E-09   | 0.000771  | 6.83E-09 | increasing     | 0          |
| <i>LOC103237606</i> | Caudate | 2.16E-07   | 0.000661  | 2.04E-06 | increasing     | 0          |
| <i>LOC103237688</i> | Caudate | 4.75E-08   | -0.00024  | 0.114889 | other          | 0          |
| <i>LOC103237726</i> | Caudate | 1.40E-07   | -0.00034  | 0.019062 | other          | 0          |
| <i>LOC103237731</i> | Caudate | 1.17E-07   | 0.000715  | 1.34E-07 | increasing     | 0          |
| <i>LOC103237740</i> | Caudate | 6.21E-09   | 0.000553  | 0.000109 | other          | 0          |
| <i>LOC103237777</i> | Caudate | 9.64E-11   | 0.000829  | 1.17E-10 | increasing     | 0          |
| <i>LOC103237779</i> | Caudate | 2.31E-13   | 0.000187  | 0.212985 | other          | 0          |
| <i>LOC103237807</i> | Caudate | 4.02E-09   | 0.000159  | 0.284175 | other          | 0          |
| <i>LOC103237843</i> | Caudate | 2.23E-09   | 0.000603  | 1.23E-05 | increasing     | 0          |
| <i>LOC103237998</i> | Caudate | 1.54E-09   | 0.000676  | 3.66E-07 | increasing     | 0          |
| <i>LOC103237999</i> | Caudate | 9.48E-10   | 0.000766  | 3.16E-09 | increasing     | 1          |
| <i>LOC103238059</i> | Caudate | 2.95E-08   | 0.000158  | 0.30101  | other          | 0          |
| <i>LOC103238143</i> | Caudate | 1.78E-10   | 0.000424  | 0.002641 | other          | 0          |
| <i>LOC103238230</i> | Caudate | 5.41E-08   | 9.24E-05  | 0.535992 | other          | 0          |
| <i>LOC103238275</i> | Caudate | 2.34E-10   | 0.000526  | 0.000277 | other          | 0          |
| <i>LOC103238352</i> | Caudate | 4.81E-13   | 0.000751  | 1.20E-13 | increasing     | 0          |
| <i>LOC103238411</i> | Caudate | 1.11E-09   | -0.00081  | 6.60E-10 | decreasing     | 0          |
| <i>LOC103238427</i> | Caudate | 9.01E-07   | 0.000756  | 1.18E-08 | increasing     | 0          |
| <i>LOC103238480</i> | Caudate | 8.27E-08   | 0.00062   | 1.16E-05 | increasing     | 0          |
| <i>LOC103238484</i> | Caudate | 2.32E-08   | 0.000672  | 1.09E-06 | increasing     | 0          |
| <i>LOC103238601</i> | Caudate | 8.52E-08   | 0.000119  | 0.435243 | other          | 0          |
| <i>LOC103238617</i> | Caudate | 5.03E-12   | -0.00077  | 1.83E-09 | decreasing     | 0          |
| <i>LOC103238689</i> | Caudate | 2.81E-11   | -0.00078  | 1.26E-09 | decreasing     | 0          |
| <i>LOC103238753</i> | Caudate | 9.47E-08   | -4.72E-05 | 0.747475 | other          | 0          |
| <i>LOC103238760</i> | Caudate | 5.04E-08   | -0.00034  | 0.023235 | other          | 0          |
| <i>LOC103238816</i> | Caudate | 2.91E-10   | -0.0007   | 1.12E-07 | decreasing     | 0          |
| <i>LOC103238828</i> | Caudate | 6.44E-09   | -0.00038  | 0.011218 | other          | 0          |
| <i>LOC103238839</i> | Caudate | 5.18E-09   | -0.00079  | 2.45E-09 | decreasing     | 0          |
| <i>LOC103238840</i> | Caudate | 5.93E-08   | -0.00073  | 5.90E-08 | decreasing     | 0          |

**Supplementary Table 9. Genes with a significant age effect from either ANOVA or linear regression. Beta is the regression coefficient, Pval is the p-value for the regression coefficient of expression on age (in days). Effect category is increasing if beta is positive and significant, decreasing if beta is negative and significant, and other if the ANOVA were significant rather than the linear regression. Local eQTL is 1 if the gene had a significant local eQTL**

| Gene                | Tissue  | Anova.pval | Beta      | Pval     | EffectCategory | Local eQTL |
|---------------------|---------|------------|-----------|----------|----------------|------------|
| <i>LOC103239108</i> | Caudate | 2.58E-11   | -3.13E-05 | 0.837142 | other          | 0          |
| <i>LOC103239234</i> | Caudate | 2.58E-05   | 0.00068   | 1.88E-07 | increasing     | 1          |
| <i>LOC103239292</i> | Caudate | 6.69E-10   | 0.000282  | 0.055136 | other          | 0          |
| <i>LOC103239363</i> | Caudate | 8.28E-10   | 0.000338  | 0.023917 | other          | 0          |
| <i>LOC103239473</i> | Caudate | 2.88E-10   | -0.00061  | 1.46E-05 | decreasing     | 0          |
| <i>LOC103239626</i> | Caudate | 1.30E-07   | -0.00069  | 1.97E-07 | decreasing     | 0          |
| <i>LOC103239649</i> | Caudate | 5.99E-08   | 0.000703  | 8.13E-08 | increasing     | 0          |
| <i>LOC103239704</i> | Caudate | 2.38E-10   | 0.000752  | 1.80E-08 | increasing     | 0          |
| <i>LOC103239792</i> | Caudate | 1.01E-07   | -6.34E-05 | 0.67471  | other          | 0          |
| <i>LOC103239802</i> | Caudate | 5.07E-08   | 0.000668  | 1.30E-06 | increasing     | 0          |
| <i>LOC103239864</i> | Caudate | 2.29E-10   | -0.00079  | 2.60E-09 | decreasing     | 0          |
| <i>LOC103239908</i> | Caudate | 1.20E-08   | 0.000661  | 7.61E-07 | increasing     | 0          |
| <i>LOC103239946</i> | Caudate | 4.96E-08   | -0.00014  | 0.34375  | other          | 0          |
| <i>LOC103239962</i> | Caudate | 7.47E-11   | 0.000796  | 5.06E-10 | increasing     | 0          |
| <i>LOC103239981</i> | Caudate | 9.96E-08   | 0.000696  | 1.97E-07 | increasing     | 0          |
| <i>LOC103240081</i> | Caudate | 4.91E-09   | 0.000591  | 3.05E-05 | increasing     | 0          |
| <i>LOC103240085</i> | Caudate | 1.12E-08   | 0.000289  | 0.053407 | other          | 0          |
| <i>LOC103240099</i> | Caudate | 1.04E-07   | 1.72E-05  | 0.902767 | other          | 0          |
| <i>LOC103240143</i> | Caudate | 7.34E-09   | -0.00015  | 0.315084 | other          | 0          |
| <i>LOC103240270</i> | Caudate | 1.72E-07   | -0.00033  | 0.024373 | other          | 1          |
| <i>LOC103240400</i> | Caudate | 9.66E-13   | 0.000781  | 1.65E-09 | increasing     | 0          |
| <i>LOC103240479</i> | Caudate | 9.20E-09   | -0.00073  | 3.21E-08 | decreasing     | 0          |
| <i>LOC103240517</i> | Caudate | 2.41E-09   | -0.00016  | 0.285561 | other          | 0          |
| <i>LOC103240632</i> | Caudate | 2.35E-07   | -0.00062  | 1.17E-05 | decreasing     | 0          |
| <i>LOC103240698</i> | Caudate | 2.96E-05   | -0.00073  | 8.02E-08 | decreasing     | 0          |
| <i>LOC103240739</i> | Caudate | 1.24E-07   | -0.00021  | 0.162877 | other          | 0          |
| <i>LOC103240747</i> | Caudate | 3.99E-08   | -0.00067  | 9.42E-07 | decreasing     | 1          |
| <i>LOC103240867</i> | Caudate | 3.88E-10   | -0.00058  | 4.89E-05 | decreasing     | 0          |
| <i>LOC103240892</i> | Caudate | 6.52E-07   | -0.00077  | 8.00E-09 | decreasing     | 0          |
| <i>LOC103240893</i> | Caudate | 6.71E-08   | -0.00076  | 1.55E-08 | decreasing     | 0          |
| <i>LOC103240894</i> | Caudate | 4.07E-09   | -0.0008   | 1.41E-09 | decreasing     | 0          |
| <i>LOC103240895</i> | Caudate | 3.34E-07   | -0.00074  | 3.27E-08 | decreasing     | 0          |
| <i>LOC103240939</i> | Caudate | 1.64E-07   | -0.00046  | 0.001712 | other          | 1          |
| <i>LOC103240941</i> | Caudate | 1.80E-07   | -0.00042  | 0.003507 | other          | 0          |
| <i>LOC103240952</i> | Caudate | 1.73E-07   | 0.00061   | 1.37E-05 | increasing     | 1          |
| <i>LOC103240993</i> | Caudate | 3.81E-05   | 0.000722  | 1.05E-07 | increasing     | 0          |
| <i>LOC103241014</i> | Caudate | 1.41E-07   | -0.00019  | 0.218396 | other          | 0          |
| <i>LOC103241031</i> | Caudate | 1.04E-07   | 0.000435  | 0.00302  | other          | 0          |
| <i>LOC103241038</i> | Caudate | 1.16E-10   | 0.000679  | 1.96E-07 | increasing     | 0          |
| <i>LOC103241174</i> | Caudate | 1.16E-07   | -0.00063  | 3.91E-06 | decreasing     | 0          |

**Supplementary Table 9. Genes with a significant age effect from either ANOVA or linear regression. Beta is the regression coefficient, Pval is the p-value for the regression coefficient of expression on age (in days). Effect category is increasing if beta is positive and significant, decreasing if beta is negative and significant, and other if the ANOVA were significant rather than the linear regression. Local eQTL is 1 if the gene had a significant local eQTL**

| Gene                | Tissue  | Anova.pval | Beta     | Pval     | EffectCategory | Local eQTL |
|---------------------|---------|------------|----------|----------|----------------|------------|
| <i>LOC103241683</i> | Caudate | 1.13E-10   | 0.000786 | 1.43E-09 | increasing     | 0          |
| <i>LOC103241714</i> | Caudate | 9.07E-08   | 0.000139 | 0.36305  | other          | 0          |
| <i>LOC103241820</i> | Caudate | 6.40E-09   | 0.000596 | 2.65E-05 | increasing     | 0          |
| <i>LOC103241899</i> | Caudate | 9.18E-09   | 0.000336 | 0.021319 | other          | 0          |
| <i>LOC103241967</i> | Caudate | 2.03E-08   | 0.000763 | 4.67E-09 | increasing     | 1          |
| <i>LOC103242002</i> | Caudate | 3.90E-09   | 0.000373 | 0.012708 | other          | 0          |
| <i>LOC103242062</i> | Caudate | 1.25E-07   | 0.000417 | 0.004484 | other          | 0          |
| <i>LOC103242120</i> | Caudate | 3.54E-11   | -0.00019 | 0.187827 | other          | 0          |
| <i>LOC103242178</i> | Caudate | 6.40E-08   | 0.000285 | 0.053025 | other          | 0          |
| <i>LOC103242238</i> | Caudate | 8.08E-11   | 0.000676 | 8.75E-07 | increasing     | 0          |
| <i>LOC103242416</i> | Caudate | 1.87E-09   | -0.00069 | 4.40E-07 | decreasing     | 0          |
| <i>LOC103242421</i> | Caudate | 2.13E-07   | 0.000731 | 6.98E-08 | increasing     | 0          |
| <i>LOC103242629</i> | Caudate | 1.16E-08   | 0.000685 | 3.73E-07 | increasing     | 0          |
| <i>LOC103242643</i> | Caudate | 5.39E-14   | 0.000833 | 1.59E-11 | increasing     | 0          |
| <i>LOC103242699</i> | Caudate | 2.24E-10   | 0.000474 | 0.000977 | other          | 0          |
| <i>LOC103242716</i> | Caudate | 3.90E-05   | 0.000701 | 1.47E-07 | increasing     | 1          |
| <i>LOC103242839</i> | Caudate | 1.01E-07   | 0.000485 | 0.000917 | other          | 0          |
| <i>LOC103242925</i> | Caudate | 9.37E-12   | 0.000603 | 7.38E-06 | increasing     | 0          |
| <i>LOC103242949</i> | Caudate | 4.76E-09   | 0.000103 | 0.492218 | other          | 0          |
| <i>LOC103243100</i> | Caudate | 3.02E-12   | 0.000858 | 1.27E-11 | increasing     | 0          |
| <i>LOC103243139</i> | Caudate | 5.65E-09   | 0.000598 | 1.59E-05 | increasing     | 0          |
| <i>LOC103243152</i> | Caudate | 3.72E-08   | 0.000139 | 0.358307 | other          | 0          |
| <i>LOC103243159</i> | Caudate | 3.50E-11   | -0.00061 | 6.04E-06 | decreasing     | 0          |
| <i>LOC103243190</i> | Caudate | 3.50E-09   | 0.000675 | 1.11E-06 | increasing     | 0          |
| <i>LOC103243191</i> | Caudate | 4.99E-08   | 0.000117 | 0.442514 | other          | 0          |
| <i>LOC103243230</i> | Caudate | 1.28E-08   | 0.000677 | 7.84E-07 | increasing     | 0          |
| <i>LOC103243234</i> | Caudate | 7.92E-12   | 0.000575 | 4.76E-05 | increasing     | 0          |
| <i>LOC103243287</i> | Caudate | 1.25E-09   | 0.000723 | 4.39E-08 | increasing     | 0          |
| <i>LOC103243335</i> | Caudate | 7.91E-08   | 0.000599 | 2.25E-05 | increasing     | 0          |
| <i>LOC103243427</i> | Caudate | 1.58E-07   | 0.000621 | 1.02E-05 | increasing     | 0          |
| <i>LOC103243440</i> | Caudate | 1.41E-07   | 0.000739 | 4.64E-08 | increasing     | 1          |
| <i>LOC103243446</i> | Caudate | 2.96E-08   | 0.0007   | 3.01E-07 | increasing     | 0          |
| <i>LOC103243458</i> | Caudate | 3.33E-12   | 0.000822 | 9.47E-11 | increasing     | 0          |
| <i>LOC103243459</i> | Caudate | 7.02E-09   | 0.000781 | 1.68E-11 | increasing     | 0          |
| <i>LOC103243667</i> | Caudate | 1.07E-05   | 0.000728 | 8.09E-08 | increasing     | 0          |
| <i>LOC103243675</i> | Caudate | 1.99E-06   | 0.00075  | 2.34E-08 | increasing     | 0          |
| <i>LOC103243707</i> | Caudate | 2.13E-07   | 0.000702 | 3.00E-07 | increasing     | 0          |
| <i>LOC103243721</i> | Caudate | 1.16E-07   | 0.000158 | 0.285267 | other          | 0          |
| <i>LOC103243722</i> | Caudate | 2.57E-10   | 0.000295 | 0.043098 | other          | 0          |
| <i>LOC103243880</i> | Caudate | 4.93E-08   | 0.000427 | 0.002426 | other          | 0          |

**Supplementary Table 9. Genes with a significant age effect from either ANOVA or linear regression. Beta is the regression coefficient, Pval is the p-value for the regression coefficient of expression on age (in days). Effect category is increasing if beta is positive and significant, decreasing if beta is negative and significant, and other if the ANOVA were significant rather than the linear regression. Local eQTL is 1 if the gene had a significant local eQTL**

| Gene         | Tissue  | Anova.pval | Beta      | Pval     | EffectCategory | Local eQTL |
|--------------|---------|------------|-----------|----------|----------------|------------|
| LOC103243906 | Caudate | 1.79E-08   | -0.00063  | 4.89E-06 | decreasing     | 0          |
| LOC103243907 | Caudate | 5.00E-12   | -0.00023  | 0.116092 | other          | 0          |
| LOC103243909 | Caudate | 3.82E-09   | -0.00036  | 0.014949 | other          | 0          |
| LOC103243940 | Caudate | 2.12E-07   | -0.00057  | 4.56E-05 | decreasing     | 1          |
| LOC103244047 | Caudate | 5.05E-10   | 0.000778  | 1.13E-09 | increasing     | 0          |
| LOC103244172 | Caudate | 8.67E-08   | 2.88E-05  | 0.851313 | other          | 0          |
| LOC103244243 | Caudate | 4.21E-12   | 0.000821  | 2.32E-10 | increasing     | 0          |
| LOC103244257 | Caudate | 1.68E-09   | -0.00013  | 0.386066 | other          | 0          |
| LOC103244355 | Caudate | 2.29E-08   | 0.000384  | 0.009881 | other          | 0          |
| LOC103244555 | Caudate | 1.57E-08   | -0.00073  | 6.35E-08 | decreasing     | 0          |
| LOC103244672 | Caudate | 4.08E-09   | 0.000112  | 0.463269 | other          | 0          |
| LOC103244676 | Caudate | 9.01E-08   | -0.00029  | 0.045042 | other          | 0          |
| LOC103244678 | Caudate | 3.61E-08   | -0.00057  | 4.17E-05 | decreasing     | 0          |
| LOC103244679 | Caudate | 3.14E-09   | -0.00059  | 3.63E-05 | decreasing     | 0          |
| LOC103244683 | Caudate | 1.19E-07   | -0.00056  | 6.38E-05 | decreasing     | 0          |
| LOC103244731 | Caudate | 2.40E-07   | -6.71E-05 | 0.662239 | other          | 0          |
| LOC103244868 | Caudate | 1.10E-15   | 0.000852  | 4.01E-12 | increasing     | 0          |
| LOC103244941 | Caudate | 3.86E-09   | 0.000312  | 0.036787 | other          | 0          |
| LOC103245038 | Caudate | 1.02E-07   | 0.000687  | 2.07E-07 | increasing     | 0          |
| LOC103245076 | Caudate | 3.76E-09   | 0.000287  | 0.049491 | other          | 0          |
| LOC103245173 | Caudate | 6.17E-09   | -0.00074  | 5.83E-09 | decreasing     | 0          |
| LOC103245175 | Caudate | 4.01E-13   | -0.0008   | 1.22E-10 | decreasing     | 0          |
| LOC103245180 | Caudate | 3.41E-10   | -0.0006   | 1.22E-05 | decreasing     | 0          |
| LOC103245191 | Caudate | 1.77E-12   | -0.00082  | 2.75E-10 | decreasing     | 0          |
| LOC103245262 | Caudate | 6.08E-10   | 0.000651  | 2.89E-06 | increasing     | 0          |
| LOC103245291 | Caudate | 2.38E-10   | 0.000774  | 5.51E-09 | increasing     | 0          |
| LOC103245361 | Caudate | 1.70E-08   | 0.00069   | 9.89E-08 | increasing     | 0          |
| LOC103245389 | Caudate | 1.39E-07   | 0.000667  | 5.68E-07 | increasing     | 0          |
| LOC103245450 | Caudate | 3.36E-13   | 0.000518  | 0.000368 | other          | 0          |
| LOC103245600 | Caudate | 7.88E-09   | 0.000185  | 0.220568 | other          | 0          |
| LOC103245736 | Caudate | 8.91E-08   | 0.000662  | 1.16E-06 | increasing     | 1          |
| LOC103245737 | Caudate | 1.73E-18   | 0.000882  | 5.39E-13 | increasing     | 0          |
| LOC103245897 | Caudate | 4.77E-10   | -0.0008   | 3.14E-10 | decreasing     | 0          |
| LOC103245947 | Caudate | 1.27E-08   | 0.000477  | 0.000805 | other          | 0          |
| LOC103246021 | Caudate | 2.81E-09   | 0.000713  | 1.75E-07 | increasing     | 0          |
| LOC103246023 | Caudate | 4.71E-11   | 0.000747  | 2.81E-08 | increasing     | 0          |
| LOC103246025 | Caudate | 3.09E-09   | 0.000716  | 7.43E-08 | increasing     | 0          |
| LOC103246030 | Caudate | 7.61E-13   | 0.000718  | 9.04E-08 | increasing     | 0          |
| LOC103246043 | Caudate | 1.51E-08   | -0.0002   | 0.184473 | other          | 0          |
| LOC103246114 | Caudate | 3.45E-10   | 0.000226  | 0.133048 | other          | 0          |

**Supplementary Table 9. Genes with a significant age effect from either ANOVA or linear regression. Beta is the regression coefficient, Pval is the p-value for the regression coefficient of expression on age (in days). Effect category is increasing if beta is positive and significant, decreasing if beta is negative and significant, and other if the ANOVA were significant rather than the linear regression. Local eQTL is 1 if the gene had a significant local eQTL**

| Gene                | Tissue  | Anova.pval | Beta     | Pval     | EffectCategory | Local eQTL |
|---------------------|---------|------------|----------|----------|----------------|------------|
| <i>LOC103246153</i> | Caudate | 4.77E-09   | -0.00044 | 0.002964 | other          | 0          |
| <i>LOC103246220</i> | Caudate | 1.34E-06   | 0.000727 | 3.56E-08 | increasing     | 0          |
| <i>LOC103246334</i> | Caudate | 3.44E-10   | -0.00075 | 3.16E-09 | decreasing     | 0          |
| <i>LOC103246345</i> | Caudate | 5.73E-08   | 0.000717 | 2.34E-08 | increasing     | 0          |
| <i>LOC103246347</i> | Caudate | 1.20E-06   | 0.000679 | 2.01E-07 | increasing     | 0          |
| <i>LOC103246417</i> | Caudate | 1.20E-09   | 0.000453 | 0.001951 | other          | 0          |
| <i>LOC103246495</i> | Caudate | 1.84E-08   | 0.000529 | 0.000223 | other          | 0          |
| <i>LOC103246522</i> | Caudate | 1.33E-09   | -0.00074 | 1.88E-08 | decreasing     | 0          |
| <i>LOC103246533</i> | Caudate | 2.41E-08   | -0.0001  | 0.497134 | other          | 0          |
| <i>LOC103246546</i> | Caudate | 2.30E-08   | 0.000404 | 0.006294 | other          | 0          |
| <i>LOC103246562</i> | Caudate | 2.54E-06   | 0.000704 | 2.55E-07 | increasing     | 1          |
| <i>LOC103246613</i> | Caudate | 1.27E-07   | 0.000297 | 0.039043 | other          | 0          |
| <i>LOC103246651</i> | Caudate | 2.68E-12   | -0.00087 | 3.57E-12 | decreasing     | 0          |
| <i>LOC103246661</i> | Caudate | 4.74E-08   | 0.000407 | 0.005735 | other          | 0          |
| <i>LOC103246814</i> | Caudate | 6.71E-09   | -0.00014 | 0.361264 | other          | 0          |
| <i>LOC103246838</i> | Caudate | 7.31E-11   | 0.000388 | 0.007452 | other          | 0          |
| <i>LOC103246839</i> | Caudate | 1.10E-08   | 0.000766 | 9.64E-09 | increasing     | 0          |
| <i>LOC103246928</i> | Caudate | 1.38E-13   | 0.000792 | 1.22E-09 | increasing     | 0          |
| <i>LOC103246945</i> | Caudate | 5.95E-11   | 0.000702 | 3.14E-07 | increasing     | 0          |
| <i>LOC103246970</i> | Caudate | 1.79E-10   | 9.97E-06 | 0.94772  | other          | 0          |
| <i>LOC103247226</i> | Caudate | 5.72E-14   | 0.00063  | 2.27E-06 | increasing     | 0          |
| <i>LOC103247904</i> | Caudate | 5.71E-11   | -0.00024 | 0.044942 | other          | 0          |
| <i>LOC103248139</i> | Caudate | 6.39E-10   | -0.00083 | 4.57E-11 | decreasing     | 0          |
| <i>LOC103248140</i> | Caudate | 6.49E-13   | -0.00086 | 4.50E-12 | decreasing     | 0          |
| <i>LOC103248141</i> | Caudate | 2.24E-11   | -0.00083 | 7.19E-11 | decreasing     | 0          |
| <i>LOC103248297</i> | Caudate | 1.31E-11   | -0.00077 | 3.02E-09 | decreasing     | 0          |
| <i>LOC103248300</i> | Caudate | 1.72E-09   | -0.00069 | 1.55E-07 | decreasing     | 0          |
| <i>LOC103248301</i> | Caudate | 2.07E-08   | -0.00074 | 1.28E-08 | decreasing     | 0          |
| <i>LOC103248302</i> | Caudate | 7.61E-13   | -0.00083 | 6.46E-11 | decreasing     | 0          |
| <i>LOC103248307</i> | Caudate | 4.10E-08   | -0.00077 | 3.02E-09 | decreasing     | 0          |
| <i>LOC103248308</i> | Caudate | 6.24E-09   | -0.00073 | 3.05E-08 | decreasing     | 0          |
| <i>LOC103248381</i> | Caudate | 1.55E-08   | -0.0008  | 1.17E-09 | decreasing     | 0          |
| <i>LOC103248471</i> | Caudate | 6.27E-08   | -0.00047 | 0.001247 | other          | 0          |
| <i>LOC103248619</i> | Caudate | 3.58E-08   | 0.000482 | 0.000934 | other          | 0          |
| <i>LOC103248736</i> | Caudate | 6.23E-10   | 8.58E-05 | 0.57002  | other          | 0          |
| <i>LOC103248816</i> | Caudate | 9.97E-07   | 0.000674 | 2.60E-07 | increasing     | 0          |
| <i>LOC103248823</i> | Caudate | 4.99E-10   | -0.00036 | 0.012733 | other          | 0          |
| <i>LOC103248872</i> | Caudate | 2.81E-08   | -0.00074 | 3.32E-08 | decreasing     | 0          |
| <i>LOC103248873</i> | Caudate | 6.69E-09   | -0.00072 | 7.33E-08 | decreasing     | 0          |
| <i>LOC103248881</i> | Caudate | 4.28E-08   | -0.00071 | 2.46E-07 | decreasing     | 0          |

**Supplementary Table 9. Genes with a significant age effect from either ANOVA or linear regression. Beta is the regression coefficient, Pval is the p-value for the regression coefficient of expression on age (in days). Effect category is increasing if beta is positive and significant, decreasing if beta is negative and significant, and other if the ANOVA were significant rather than the linear regression. Local eQTL is 1 if the gene had a significant local eQTL**

| Gene                | Tissue  | Anova.pval | Beta     | Pval     | EffectCategory | Local eQTL |
|---------------------|---------|------------|----------|----------|----------------|------------|
| <i>LOC103248888</i> | Caudate | 5.10E-08   | 0.000749 | 2.51E-08 | increasing     | 0          |
| <i>LOC103248909</i> | Caudate | 1.98E-07   | 0.000572 | 5.38E-05 | increasing     | 0          |
| <i>LOC103248985</i> | Caudate | 5.86E-09   | 0.000711 | 8.81E-08 | increasing     | 0          |
| <i>LOH12CR1</i>     | Caudate | 1.58E-07   | 0.000691 | 3.13E-07 | increasing     | 0          |
| <i>LONP1</i>        | Caudate | 2.08E-10   | 0.000541 | 0.000183 | other          | 0          |
| <i>LONRF2</i>       | Caudate | 7.69E-12   | 0.000804 | 1.11E-10 | increasing     | 0          |
| <i>LOXHD1</i>       | Caudate | 1.27E-07   | -0.00062 | 7.37E-06 | decreasing     | 1          |
| <i>LPAR1</i>        | Caudate | 1.60E-11   | 0.000767 | 2.43E-09 | increasing     | 0          |
| <i>LPCAT4</i>       | Caudate | 5.68E-08   | 0.000585 | 2.35E-05 | increasing     | 0          |
| <i>LPHN2</i>        | Caudate | 5.92E-11   | -0.00074 | 1.63E-08 | decreasing     | 0          |
| <i>LRCH2</i>        | Caudate | 1.74E-09   | -0.00076 | 1.42E-08 | decreasing     | 0          |
| <i>LRCH4</i>        | Caudate | 3.04E-10   | 0.000818 | 2.12E-10 | increasing     | 0          |
| <i>LRFN1</i>        | Caudate | 2.60E-07   | 0.000685 | 6.46E-07 | increasing     | 0          |
| <i>LRFN4</i>        | Caudate | 2.63E-10   | -0.0001  | 0.479848 | other          | 0          |
| <i>LRP3</i>         | Caudate | 1.24E-10   | 0.000482 | 0.000991 | other          | 0          |
| <i>LRP4</i>         | Caudate | 1.21E-08   | 0.000725 | 5.11E-08 | increasing     | 0          |
| <i>LRP8</i>         | Caudate | 4.30E-09   | -0.00071 | 7.08E-08 | decreasing     | 0          |
| <i>LRRC10B</i>      | Caudate | 9.64E-09   | 0.000383 | 0.007743 | other          | 0          |
| <i>LRRC14</i>       | Caudate | 7.96E-12   | 0.000432 | 0.003485 | other          | 0          |
| <i>LRRC20</i>       | Caudate | 8.19E-08   | 0.000436 | 0.003169 | other          | 0          |
| <i>LRRC24</i>       | Caudate | 2.76E-09   | 0.000537 | 0.000204 | other          | 0          |
| <i>LRRC3</i>        | Caudate | 9.58E-14   | 0.000879 | 1.27E-12 | increasing     | 0          |
| <i>LRRC3B</i>       | Caudate | 3.81E-10   | -0.00078 | 1.31E-09 | decreasing     | 0          |
| <i>LRRC40</i>       | Caudate | 2.41E-08   | -0.00079 | 1.22E-09 | decreasing     | 0          |
| <i>LRRC41</i>       | Caudate | 2.01E-08   | 0.000391 | 0.008165 | other          | 0          |
| <i>LRRC47</i>       | Caudate | 8.53E-12   | 0.000652 | 3.03E-06 | increasing     | 0          |
| <i>LRRC49</i>       | Caudate | 9.43E-07   | -0.00074 | 2.07E-08 | decreasing     | 0          |
| <i>LRRC4C</i>       | Caudate | 5.28E-08   | -0.00077 | 8.05E-09 | decreasing     | 0          |
| <i>LRRC55</i>       | Caudate | 1.17E-07   | -0.00043 | 0.002699 | other          | 0          |
| <i>LRRC56</i>       | Caudate | 2.39E-08   | 0.000241 | 0.103778 | other          | 0          |
| <i>LRRC7</i>        | Caudate | 1.33E-09   | -0.00071 | 1.98E-07 | decreasing     | 0          |
| <i>LRRC75A</i>      | Caudate | 9.37E-09   | 0.000769 | 7.62E-09 | increasing     | 0          |
| <i>LRRC8B</i>       | Caudate | 8.62E-09   | -0.00059 | 2.43E-05 | decreasing     | 0          |
| <i>LRRC8C</i>       | Caudate | 1.03E-08   | -0.00063 | 6.39E-06 | decreasing     | 0          |
| <i>LRN1</i>         | Caudate | 2.54E-14   | -0.00082 | 2.19E-10 | decreasing     | 0          |
| <i>LRRTM3</i>       | Caudate | 3.11E-09   | -0.00074 | 3.48E-08 | decreasing     | 0          |
| <i>LRSAM1</i>       | Caudate | 6.00E-10   | 0.000737 | 4.85E-08 | increasing     | 0          |
| <i>LRTM2</i>        | Caudate | 9.39E-09   | 0.000327 | 0.022523 | other          | 0          |
| <i>LRWD1</i>        | Caudate | 6.89E-08   | 0.000193 | 0.18574  | other          | 0          |
| <i>LSM12</i>        | Caudate | 1.34E-08   | -0.00065 | 3.23E-06 | decreasing     | 0          |



**Supplementary Table 9. Genes with a significant age effect from either ANOVA or linear regression. Beta is the regression coefficient, Pval is the p-value for the regression coefficient of expression on age (in days). Effect category is increasing if beta is positive and significant, decreasing if beta is negative and significant, and other if the ANOVA were significant rather than the linear regression. Local eQTL is 1 if the gene had a significant local eQTL**

| Gene            | Tissue  | Anova.pval | Beta     | Pval     | EffectCategory | Local eQTL |
|-----------------|---------|------------|----------|----------|----------------|------------|
| <i>LSM4</i>     | Caudate | 7.42E-08   | 0.000169 | 0.265558 | other          | 0          |
| <i>LSS</i>      | Caudate | 1.06E-10   | 0.00045  | 0.002136 | other          | 0          |
| <i>LTBP1</i>    | Caudate | 4.63E-08   | -0.00062 | 5.88E-06 | decreasing     | 0          |
| <i>LTBP4</i>    | Caudate | 1.06E-07   | 0.000733 | 5.46E-08 | increasing     | 1          |
| <i>LY6E</i>     | Caudate | 2.35E-07   | 0.000611 | 1.53E-05 | increasing     | 1          |
| <i>LYNX1</i>    | Caudate | 1.24E-09   | 0.00044  | 0.002156 | other          | 0          |
| <i>LYPD1</i>    | Caudate | 1.39E-07   | -0.0006  | 1.35E-05 | decreasing     | 0          |
| <i>LYPLA1</i>   | Caudate | 2.80E-06   | -0.00073 | 5.41E-08 | decreasing     | 0          |
| <i>LYVE1</i>    | Caudate | 8.49E-08   | -0.00056 | 8.25E-05 | decreasing     | 0          |
| <i>LZTR1</i>    | Caudate | 3.00E-09   | 0.000739 | 4.03E-08 | increasing     | 0          |
| <i>LZTS2</i>    | Caudate | 7.70E-15   | 0.000839 | 5.97E-11 | increasing     | 0          |
| <i>MACROD1</i>  | Caudate | 2.03E-12   | 0.000748 | 2.20E-08 | increasing     | 0          |
| <i>MAD1L1</i>   | Caudate | 4.70E-11   | 0.000245 | 0.097504 | other          | 0          |
| <i>MAGI3</i>    | Caudate | 4.02E-08   | -0.00071 | 1.62E-07 | decreasing     | 0          |
| <i>MAL</i>      | Caudate | 1.96E-07   | 0.000636 | 2.98E-06 | increasing     | 0          |
| <i>MAN1B1</i>   | Caudate | 2.33E-09   | 0.000366 | 0.014208 | other          | 0          |
| <i>MAN2A1</i>   | Caudate | 8.35E-08   | 0.000106 | 0.47769  | other          | 0          |
| <i>MAN2A2</i>   | Caudate | 4.65E-10   | 0.000818 | 1.16E-10 | increasing     | 0          |
| <i>MAN2B2</i>   | Caudate | 3.72E-07   | 0.000714 | 1.43E-07 | increasing     | 1          |
| <i>MAN2C1</i>   | Caudate | 5.38E-14   | 0.000845 | 8.04E-12 | increasing     | 0          |
| <i>MANEA</i>    | Caudate | 2.67E-05   | -0.0007  | 1.50E-07 | decreasing     | 0          |
| <i>MAP1LC3A</i> | Caudate | 2.50E-07   | 1.19E-05 | 0.9371   | other          | 0          |
| <i>MAP1S</i>    | Caudate | 2.82E-09   | 0.000793 | 7.37E-10 | increasing     | 0          |
| <i>MAP2K2</i>   | Caudate | 3.01E-11   | 0.000495 | 0.000687 | other          | 0          |
| <i>MAP2K3</i>   | Caudate | 7.45E-11   | 0.000819 | 1.40E-10 | increasing     | 0          |
| <i>MAP2K7</i>   | Caudate | 1.00E-10   | 0.000561 | 9.41E-05 | increasing     | 0          |
| <i>MAP3K1</i>   | Caudate | 1.11E-10   | -0.00075 | 1.32E-08 | decreasing     | 0          |
| <i>MAP3K10</i>  | Caudate | 1.68E-08   | 0.000541 | 0.000165 | other          | 0          |
| <i>MAP3K11</i>  | Caudate | 2.81E-10   | 0.000682 | 7.41E-07 | increasing     | 0          |
| <i>MAP3K12</i>  | Caudate | 2.27E-09   | 0.00026  | 0.081972 | other          | 0          |
| <i>MAP3K2</i>   | Caudate | 4.44E-09   | -0.00073 | 6.55E-08 | decreasing     | 0          |
| <i>MAP3K3</i>   | Caudate | 1.07E-08   | 0.000606 | 1.92E-05 | increasing     | 0          |
| <i>MAP3K6</i>   | Caudate | 2.40E-13   | 0.000872 | 1.53E-12 | increasing     | 0          |
| <i>MAP3K7</i>   | Caudate | 6.42E-09   | -0.0006  | 2.55E-05 | decreasing     | 0          |
| <i>MAP4K2</i>   | Caudate | 2.95E-10   | 0.000699 | 3.11E-07 | increasing     | 0          |
| <i>MAP4K3</i>   | Caudate | 1.61E-08   | -0.00074 | 4.30E-08 | decreasing     | 0          |
| <i>MAP6D1</i>   | Caudate | 2.31E-11   | 0.000811 | 2.88E-10 | increasing     | 0          |
| <i>MAP7</i>     | Caudate | 1.91E-08   | 0.00059  | 1.93E-05 | increasing     | 0          |
| <i>MAP7D1</i>   | Caudate | 7.31E-14   | 0.000844 | 2.88E-11 | increasing     | 0          |
| <i>MAPK11</i>   | Caudate | 1.16E-10   | 0.000551 | 0.000123 | other          | 0          |

**Supplementary Table 9. Genes with a significant age effect from either ANOVA or linear regression. Beta is the regression coefficient, Pval is the p-value for the regression coefficient of expression on age (in days). Effect category is increasing if beta is positive and significant, decreasing if beta is negative and significant, and other if the ANOVA were significant rather than the linear regression. Local eQTL is 1 if the gene had a significant local eQTL**

| Gene             | Tissue  | Anova.pval | Beta      | Pval     | EffectCategory | Local eQTL |
|------------------|---------|------------|-----------|----------|----------------|------------|
| <i>MAPK12</i>    | Caudate | 1.22E-07   | 0.00058   | 4.98E-05 | increasing     | 0          |
| <i>MAPK13</i>    | Caudate | 2.56E-08   | 0.0008    | 7.15E-10 | increasing     | 0          |
| <i>MAPK1IP1L</i> | Caudate | 4.16E-10   | -0.00041  | 0.005561 | other          | 0          |
| <i>MAPK3</i>     | Caudate | 1.20E-10   | 0.000683  | 3.11E-07 | increasing     | 0          |
| <i>MAPK8</i>     | Caudate | 8.57E-19   | -0.0009   | 5.02E-14 | decreasing     | 0          |
| <i>MAPK8IP1</i>  | Caudate | 1.63E-11   | 0.000526  | 0.000277 | other          | 0          |
| <i>MAPK8IP2</i>  | Caudate | 7.65E-12   | 0.000711  | 2.00E-07 | increasing     | 0          |
| <i>MAPK8IP3</i>  | Caudate | 1.62E-12   | 0.00068   | 8.61E-07 | increasing     | 0          |
| <i>MAPRE1</i>    | Caudate | 2.38E-13   | -0.00083  | 7.07E-11 | decreasing     | 0          |
| <i>MARCH5</i>    | Caudate | 1.51E-07   | -0.00071  | 1.92E-07 | decreasing     | 0          |
| <i>MARCH8</i>    | Caudate | 1.59E-14   | 0.000865  | 4.68E-13 | increasing     | 0          |
| <i>MARCH9</i>    | Caudate | 1.65E-10   | 4.66E-05  | 0.755236 | other          | 0          |
| <i>MARCKS</i>    | Caudate | 5.65E-14   | -0.0008   | 9.01E-11 | decreasing     | 0          |
| <i>MARCKSL1</i>  | Caudate | 4.43E-09   | -0.00041  | 0.003844 | other          | 0          |
| <i>MARK1</i>     | Caudate | 1.74E-13   | -0.00085  | 2.07E-11 | decreasing     | 0          |
| <i>MARK3</i>     | Caudate | 2.14E-08   | -0.00058  | 3.89E-05 | decreasing     | 0          |
| <i>MARS</i>      | Caudate | 8.33E-08   | 0.000226  | 0.137564 | other          | 0          |
| <i>MAT2A</i>     | Caudate | 4.73E-08   | -0.00024  | 0.113347 | other          | 0          |
| <i>MATN3</i>     | Caudate | 1.14E-07   | -0.00068  | 4.16E-07 | decreasing     | 1          |
| <i>MAU2</i>      | Caudate | 8.45E-12   | 0.000468  | 0.001097 | other          | 0          |
| <i>MAZ</i>       | Caudate | 3.36E-10   | -0.00043  | 0.002747 | other          | 0          |
| <i>MB21D2</i>    | Caudate | 3.16E-08   | -0.00053  | 0.000164 | other          | 0          |
| <i>MBD1</i>      | Caudate | 1.93E-09   | 0.000371  | 0.01269  | other          | 0          |
| <i>MBD3</i>      | Caudate | 5.62E-08   | 0.000468  | 0.001419 | other          | 0          |
| <i>MBIP</i>      | Caudate | 8.07E-09   | -0.00027  | 0.07755  | other          | 1          |
| <i>MBLAC1</i>    | Caudate | 3.53E-09   | 0.000585  | 3.69E-05 | increasing     | 0          |
| <i>MBNL1</i>     | Caudate | 1.23E-08   | -0.00056  | 6.39E-05 | decreasing     | 0          |
| <i>MBNL2</i>     | Caudate | 5.06E-12   | -6.63E-05 | 0.659027 | other          | 0          |
| <i>MBOAT7</i>    | Caudate | 6.11E-12   | 0.000783  | 8.08E-10 | increasing     | 0          |
| <i>MBP</i>       | Caudate | 1.51E-12   | 0.000764  | 2.84E-09 | increasing     | 0          |
| <i>MCC</i>       | Caudate | 5.94E-12   | 0.00027   | 0.069593 | other          | 0          |
| <i>MCF2L</i>     | Caudate | 1.69E-09   | 0.000693  | 4.83E-07 | increasing     | 0          |
| <i>MCF2L2</i>    | Caudate | 2.37E-12   | 0.000801  | 1.45E-10 | increasing     | 1          |
| <i>MCM2</i>      | Caudate | 1.94E-11   | 0.000166  | 0.271787 | other          | 0          |
| <i>MCM3AP</i>    | Caudate | 4.17E-09   | 0.000443  | 0.002687 | other          | 0          |
| <i>MCM7</i>      | Caudate | 1.44E-10   | 0.000248  | 0.087318 | other          | 0          |
| <i>MCTP1</i>     | Caudate | 3.12E-11   | -0.00027  | 0.065714 | other          | 0          |
| <i>MCU</i>       | Caudate | 4.47E-08   | -0.00073  | 3.06E-08 | decreasing     | 0          |
| <i>MEAF6</i>     | Caudate | 6.12E-09   | -0.00021  | 0.16029  | other          | 0          |
| <i>MECR</i>      | Caudate | 6.88E-11   | 0.000161  | 0.277886 | other          | 0          |

**Supplementary Table 9. Genes with a significant age effect from either ANOVA or linear regression. Beta is the regression coefficient, Pval is the p-value for the regression coefficient of expression on age (in days). Effect category is increasing if beta is positive and significant, decreasing if beta is negative and significant, and other if the ANOVA were significant rather than the linear regression. Local eQTL is 1 if the gene had a significant local eQTL**

| Gene           | Tissue  | Anova.pval | Beta     | Pval     | EffectCategory | Local eQTL |
|----------------|---------|------------|----------|----------|----------------|------------|
| <i>MED13</i>   | Caudate | 5.86E-09   | -0.0006  | 2.71E-05 | decreasing     | 0          |
| <i>MED16</i>   | Caudate | 3.39E-10   | 0.000577 | 5.19E-05 | increasing     | 0          |
| <i>MED22</i>   | Caudate | 3.36E-09   | 0.000405 | 0.005576 | other          | 0          |
| <i>MED25</i>   | Caudate | 2.25E-09   | 0.000489 | 0.000438 | other          | 0          |
| <i>MEF2C</i>   | Caudate | 2.93E-18   | -0.00084 | 6.25E-12 | decreasing     | 0          |
| <i>MEGF10</i>  | Caudate | 2.41E-09   | 0.000688 | 2.88E-07 | increasing     | 0          |
| <i>MEGF6</i>   | Caudate | 9.26E-09   | 0.000662 | 2.03E-06 | increasing     | 0          |
| <i>MEGF8</i>   | Caudate | 2.42E-11   | 0.00062  | 1.15E-05 | increasing     | 0          |
| <i>MEIS2</i>   | Caudate | 4.04E-09   | -0.00072 | 3.18E-08 | decreasing     | 0          |
| <i>MEPCE</i>   | Caudate | 2.76E-10   | 0.000773 | 5.72E-09 | increasing     | 0          |
| <i>MEST</i>    | Caudate | 1.71E-11   | -0.00047 | 0.000803 | other          | 0          |
| <i>METRN</i>   | Caudate | 1.02E-08   | 0.000286 | 0.056348 | other          | 0          |
| <i>METTL12</i> | Caudate | 2.67E-09   | 0.000281 | 0.057356 | other          | 0          |
| <i>METTL16</i> | Caudate | 2.97E-10   | 0.000833 | 9.65E-11 | increasing     | 0          |
| <i>METTL7B</i> | Caudate | 2.28E-07   | 0.000676 | 6.99E-07 | increasing     | 0          |
| <i>MEX3A</i>   | Caudate | 6.74E-09   | -0.00064 | 2.86E-06 | decreasing     | 0          |
| <i>MEX3B</i>   | Caudate | 2.03E-08   | -0.00054 | 7.69E-05 | decreasing     | 0          |
| <i>MEX3C</i>   | Caudate | 2.15E-09   | -0.00067 | 5.53E-07 | decreasing     | 0          |
| <i>MEX3D</i>   | Caudate | 3.94E-10   | 0.00017  | 0.252501 | other          | 0          |
| <i>MFAP3</i>   | Caudate | 6.21E-18   | -0.00087 | 1.79E-12 | decreasing     | 0          |
| <i>MFHAS1</i>  | Caudate | 6.56E-08   | 0.000269 | 0.076163 | other          | 0          |
| <i>MFSD10</i>  | Caudate | 8.87E-08   | 0.000314 | 0.032919 | other          | 0          |
| <i>MFSD3</i>   | Caudate | 3.53E-08   | 0.000413 | 0.005424 | other          | 0          |
| <i>MFSD8</i>   | Caudate | 1.23E-07   | -0.00069 | 5.38E-07 | decreasing     | 0          |
| <i>MGAT1</i>   | Caudate | 2.51E-08   | 0.000555 | 0.000114 | other          | 0          |
| <i>MGAT3</i>   | Caudate | 1.54E-07   | 0.000683 | 7.85E-07 | increasing     | 0          |
| <i>MGAT4A</i>  | Caudate | 6.81E-08   | -0.00075 | 2.59E-08 | decreasing     | 0          |
| <i>MGAT4B</i>  | Caudate | 1.09E-11   | 0.000225 | 0.128527 | other          | 0          |
| <i>MGAT4C</i>  | Caudate | 4.56E-13   | -0.00078 | 1.44E-09 | decreasing     | 0          |
| <i>MGAT5</i>   | Caudate | 1.01E-07   | -0.00074 | 3.74E-08 | decreasing     | 0          |
| <i>MGST1</i>   | Caudate | 8.66E-19   | -0.00081 | 3.00E-10 | decreasing     | 0          |
| <i>MIB2</i>    | Caudate | 1.63E-11   | 0.000581 | 4.59E-05 | increasing     | 0          |
| <i>MICAL2</i>  | Caudate | 7.51E-14   | 0.00083  | 2.10E-11 | increasing     | 0          |
| <i>MID1</i>    | Caudate | 1.06E-07   | -0.00044 | 0.003022 | other          | 0          |
| <i>MID1IP1</i> | Caudate | 1.45E-20   | 0.000882 | 3.18E-13 | increasing     | 0          |
| <i>MIEF2</i>   | Caudate | 3.27E-08   | 0.000423 | 0.003706 | other          | 0          |
| <i>MIER1</i>   | Caudate | 2.61E-11   | -0.00033 | 0.024346 | other          | 0          |
| <i>MIIP</i>    | Caudate | 6.99E-08   | 0.000596 | 2.77E-05 | increasing     | 0          |
| <i>MINK1</i>   | Caudate | 2.02E-09   | 0.000708 | 1.14E-07 | increasing     | 0          |
| <i>MKI67</i>   | Caudate | 2.72E-09   | -0.00069 | 2.97E-07 | decreasing     | 0          |

**Supplementary Table 9. Genes with a significant age effect from either ANOVA or linear regression. Beta is the regression coefficient, Pval is the p-value for the regression coefficient of expression on age (in days). Effect category is increasing if beta is positive and significant, decreasing if beta is negative and significant, and other if the ANOVA were significant rather than the linear regression. Local eQTL is 1 if the gene had a significant local eQTL**

| Gene            | Tissue  | Anova.pval | Beta     | Pval     | EffectCategory | Local eQTL |
|-----------------|---------|------------|----------|----------|----------------|------------|
| <i>MKLN1</i>    | Caudate | 3.87E-08   | 0.00014  | 0.344382 | other          | 0          |
| <i>MKRN3</i>    | Caudate | 7.18E-13   | -0.00078 | 1.55E-09 | decreasing     | 0          |
| <i>MLC1</i>     | Caudate | 1.96E-07   | 0.000349 | 0.016717 | other          | 0          |
| <i>MLLT11</i>   | Caudate | 1.14E-10   | -0.00053 | 0.000144 | other          | 0          |
| <i>MLLT4</i>    | Caudate | 3.27E-11   | -0.0007  | 1.37E-07 | decreasing     | 0          |
| <i>MLLT6</i>    | Caudate | 7.07E-06   | 0.000712 | 1.45E-07 | increasing     | 0          |
| <i>MLPH</i>     | Caudate | 2.34E-07   | 0.000756 | 7.94E-09 | increasing     | 0          |
| <i>MLST8</i>    | Caudate | 1.13E-09   | 0.000343 | 0.022406 | other          | 0          |
| <i>MLYCD</i>    | Caudate | 4.50E-12   | 0.000226 | 0.135142 | other          | 0          |
| <i>MMD</i>      | Caudate | 7.99E-13   | -0.00085 | 1.04E-11 | decreasing     | 0          |
| <i>MMGT1</i>    | Caudate | 5.28E-10   | -0.00048 | 0.000968 | other          | 0          |
| <i>MMP16</i>    | Caudate | 1.51E-19   | -0.00088 | 2.76E-13 | decreasing     | 0          |
| <i>MMP2</i>     | Caudate | 1.21E-08   | -0.0007  | 1.96E-07 | decreasing     | 0          |
| <i>MMP23B</i>   | Caudate | 1.80E-07   | 0.000773 | 6.07E-09 | increasing     | 0          |
| <i>MMP24</i>    | Caudate | 7.25E-10   | -0.00016 | 0.291543 | other          | 0          |
| <i>MMRN2</i>    | Caudate | 1.31E-09   | 0.000552 | 6.89E-05 | increasing     | 0          |
| <i>MMS19</i>    | Caudate | 4.28E-07   | 0.000706 | 2.27E-07 | increasing     | 0          |
| <i>MOB1A</i>    | Caudate | 1.01E-10   | -0.00082 | 3.49E-10 | decreasing     | 0          |
| <i>MOB1B</i>    | Caudate | 1.08E-09   | -0.00074 | 4.54E-08 | decreasing     | 0          |
| <i>MOB3B</i>    | Caudate | 6.72E-08   | 2.25E-05 | 0.878382 | other          | 0          |
| <i>MOG</i>      | Caudate | 1.22E-07   | 0.000614 | 6.20E-06 | increasing     | 0          |
| <i>MOGS</i>     | Caudate | 1.24E-09   | 0.000196 | 0.192469 | other          | 0          |
| <i>MOSPD2</i>   | Caudate | 4.43E-11   | -0.00022 | 0.152436 | other          | 0          |
| <i>MOXD1</i>    | Caudate | 1.71E-09   | 0.000648 | 2.86E-06 | increasing     | 0          |
| <i>MPHOSPH8</i> | Caudate | 9.41E-08   | 0.000313 | 0.033557 | other          | 0          |
| <i>MPP2</i>     | Caudate | 1.64E-08   | 0.00069  | 1.10E-07 | increasing     | 0          |
| <i>MPP3</i>     | Caudate | 7.31E-11   | 0.000179 | 0.220786 | other          | 0          |
| <i>MPP6</i>     | Caudate | 2.24E-08   | -0.00022 | 0.146728 | other          | 0          |
| <i>MPPED2</i>   | Caudate | 1.21E-07   | -0.00065 | 3.03E-06 | decreasing     | 0          |
| <i>MRC1</i>     | Caudate | 7.10E-07   | -0.00076 | 1.07E-08 | decreasing     | 0          |
| <i>MRGPRG</i>   | Caudate | 1.63E-09   | -0.00032 | 0.00657  | other          | 0          |
| <i>MRI1</i>     | Caudate | 1.70E-10   | 0.00061  | 1.66E-05 | increasing     | 1          |
| <i>MRM1</i>     | Caudate | 3.69E-08   | 0.000618 | 9.74E-06 | increasing     | 0          |
| <i>MROH1</i>    | Caudate | 4.13E-10   | 0.000642 | 4.39E-06 | increasing     | 0          |
| <i>MROH7</i>    | Caudate | 5.51E-07   | 0.000751 | 1.82E-08 | increasing     | 1          |
| <i>MRPL23</i>   | Caudate | 6.76E-08   | 0.000531 | 0.000191 | other          | 0          |
| <i>MRPL28</i>   | Caudate | 1.96E-07   | 0.000429 | 0.002827 | other          | 0          |
| <i>MRPL42</i>   | Caudate | 7.32E-10   | -0.00079 | 2.28E-09 | decreasing     | 1          |
| <i>MRPS26</i>   | Caudate | 7.75E-09   | 0.000459 | 0.001765 | other          | 0          |
| <i>MRPS34</i>   | Caudate | 1.67E-09   | 0.000542 | 0.000173 | other          | 0          |

**Supplementary Table 9. Genes with a significant age effect from either ANOVA or linear regression. Beta is the regression coefficient, Pval is the p-value for the regression coefficient of expression on age (in days). Effect category is increasing if beta is positive and significant, decreasing if beta is negative and significant, and other if the ANOVA were significant rather than the linear regression. Local eQTL is 1 if the gene had a significant local eQTL**

| Gene           | Tissue  | Anova.pval | Beta     | Pval     | EffectCategory | Local eQTL |
|----------------|---------|------------|----------|----------|----------------|------------|
| <i>MRPS6</i>   | Caudate | 5.14E-08   | 0.000323 | 0.030947 | other          | 0          |
| <i>MSANTD1</i> | Caudate | 2.38E-07   | 7.74E-05 | 0.610773 | other          | 0          |
| <i>MSH6</i>    | Caudate | 1.86E-07   | -0.00044 | 0.00165  | other          | 0          |
| <i>MSL3</i>    | Caudate | 4.59E-09   | -0.00073 | 2.24E-08 | decreasing     | 0          |
| <i>MSLN</i>    | Caudate | 6.44E-07   | 0.000704 | 2.50E-07 | increasing     | 0          |
| <i>MST1</i>    | Caudate | 1.94E-07   | 0.000705 | 2.31E-07 | increasing     | 0          |
| <i>MT1X</i>    | Caudate | 2.17E-11   | 0.000756 | 3.44E-09 | increasing     | 0          |
| <i>MTA2</i>    | Caudate | 4.35E-08   | 9.14E-05 | 0.540523 | other          | 0          |
| <i>MTCH1</i>   | Caudate | 5.51E-09   | 0.000611 | 8.57E-06 | increasing     | 0          |
| <i>MTG1</i>    | Caudate | 3.12E-11   | 8.87E-05 | 0.552736 | other          | 0          |
| <i>MTMR3</i>   | Caudate | 1.41E-15   | 0.000337 | 0.020072 | other          | 0          |
| <i>MTMR4</i>   | Caudate | 2.20E-07   | 0.000373 | 0.011525 | other          | 0          |
| <i>MTPAP</i>   | Caudate | 1.50E-07   | -0.00073 | 5.82E-08 | decreasing     | 1          |
| <i>MTPN</i>    | Caudate | 4.98E-08   | -0.00072 | 8.24E-08 | decreasing     | 0          |
| <i>MTRF1L</i>  | Caudate | 3.74E-11   | -0.0008  | 1.07E-09 | decreasing     | 1          |
| <i>MTRR</i>    | Caudate | 4.88E-08   | -0.00034 | 0.023428 | other          | 0          |
| <i>MTSS1</i>   | Caudate | 2.56E-10   | -0.0005  | 0.000431 | other          | 0          |
| <i>MTURN</i>   | Caudate | 3.52E-08   | 0.000638 | 2.73E-06 | increasing     | 0          |
| <i>MTX3</i>    | Caudate | 7.13E-08   | -0.00075 | 2.07E-08 | decreasing     | 0          |
| <i>MUSK</i>    | Caudate | 1.35E-11   | 0.000762 | 8.97E-09 | increasing     | 0          |
| <i>MUT</i>     | Caudate | 2.50E-07   | -0.00022 | 0.1257   | other          | 0          |
| <i>MUTYH</i>   | Caudate | 8.09E-10   | 0.000425 | 0.002897 | other          | 0          |
| <i>MVB12A</i>  | Caudate | 1.39E-08   | 0.00019  | 0.192605 | other          | 0          |
| <i>MXD4</i>    | Caudate | 6.13E-09   | 0.000544 | 0.000166 | other          | 0          |
| <i>MXRA7</i>   | Caudate | 1.89E-08   | 0.000285 | 0.051362 | other          | 0          |
| <i>MXRA8</i>   | Caudate | 3.85E-08   | 0.000293 | 0.045911 | other          | 0          |
| <i>MYADML2</i> | Caudate | 7.14E-10   | 4.90E-05 | 0.744558 | other          | 0          |
| <i>MYBBP1A</i> | Caudate | 1.89E-10   | 0.000545 | 0.000153 | other          | 0          |
| <i>MYBPC2</i>  | Caudate | 5.89E-09   | 0.000368 | 0.012829 | other          | 0          |
| <i>MYBPH</i>   | Caudate | 1.62E-07   | 0.000542 | 7.72E-05 | increasing     | 1          |
| <i>MYCL</i>    | Caudate | 6.49E-09   | -0.0007  | 1.58E-07 | decreasing     | 0          |
| <i>MYCN</i>    | Caudate | 1.31E-07   | -0.00052 | 0.000142 | other          | 0          |
| <i>MYCT1</i>   | Caudate | 1.81E-07   | -0.00067 | 1.58E-06 | decreasing     | 0          |
| <i>MYEF2</i>   | Caudate | 4.15E-10   | -0.00065 | 2.58E-06 | decreasing     | 0          |
| <i>MYH14</i>   | Caudate | 5.00E-09   | 0.000713 | 1.00E-07 | increasing     | 0          |
| <i>MYH3</i>    | Caudate | 3.84E-10   | -0.00069 | 1.97E-07 | decreasing     | 1          |
| <i>MYH7B</i>   | Caudate | 2.49E-12   | 0.000857 | 7.94E-12 | increasing     | 0          |
| <i>MYH9</i>    | Caudate | 2.06E-10   | 0.000692 | 2.89E-07 | increasing     | 0          |
| <i>MYO15A</i>  | Caudate | 6.28E-06   | 0.000708 | 1.81E-07 | increasing     | 1          |
| <i>MYO16</i>   | Caudate | 3.44E-15   | -0.00074 | 8.08E-09 | decreasing     | 0          |

**Supplementary Table 9. Genes with a significant age effect from either ANOVA or linear regression. Beta is the regression coefficient, Pval is the p-value for the regression coefficient of expression on age (in days). Effect category is increasing if beta is positive and significant, decreasing if beta is negative and significant, and other if the ANOVA were significant rather than the linear regression. Local eQTL is 1 if the gene had a significant local eQTL**

| Gene           | Tissue  | Anova.pval | Beta      | Pval     | EffectCategory | Local eQTL |
|----------------|---------|------------|-----------|----------|----------------|------------|
| <i>MYO18A</i>  | Caudate | 4.98E-12   | 0.000723  | 1.04E-07 | increasing     | 0          |
| <i>MYO1B</i>   | Caudate | 1.13E-13   | -0.00079  | 7.76E-10 | decreasing     | 1          |
| <i>MYO5B</i>   | Caudate | 5.79E-18   | -0.0008   | 6.35E-11 | decreasing     | 0          |
| <i>MYO5C</i>   | Caudate | 1.05E-11   | 0.000771  | 1.83E-09 | increasing     | 0          |
| <i>MYO6</i>    | Caudate | 7.62E-09   | -0.00019  | 0.196571 | other          | 1          |
| <i>MYRF</i>    | Caudate | 6.65E-12   | 0.000815  | 4.48E-11 | increasing     | 0          |
| <i>MYT1L</i>   | Caudate | 6.93E-13   | -0.00079  | 1.41E-09 | decreasing     | 0          |
| <i>MZF1</i>    | Caudate | 7.46E-10   | 0.00055   | 0.000109 | other          | 0          |
| <i>MZT2B</i>   | Caudate | 1.95E-08   | 0.000465  | 0.0015   | other          | 0          |
| <i>N4BP2</i>   | Caudate | 8.24E-09   | 3.71E-05  | 0.800181 | other          | 0          |
| <i>N4BP3</i>   | Caudate | 1.90E-08   | 5.90E-05  | 0.687375 | other          | 0          |
| <i>N6AMT2</i>  | Caudate | 2.20E-08   | -7.89E-05 | 0.594799 | other          | 0          |
| <i>NAA10</i>   | Caudate | 1.75E-08   | 0.000634  | 6.51E-06 | increasing     | 0          |
| <i>NAA15</i>   | Caudate | 3.06E-09   | -0.00069  | 6.39E-07 | decreasing     | 0          |
| <i>NAA40</i>   | Caudate | 2.18E-10   | 0.00026   | 0.071833 | other          | 0          |
| <i>NAA50</i>   | Caudate | 6.51E-11   | -0.00054  | 0.000169 | other          | 0          |
| <i>NAALAD2</i> | Caudate | 1.45E-07   | 0.000765  | 9.79E-09 | increasing     | 1          |
| <i>NACC2</i>   | Caudate | 5.89E-09   | 0.000681  | 6.19E-07 | increasing     | 0          |
| <i>NADK</i>    | Caudate | 7.05E-09   | -0.00035  | 0.018135 | other          | 0          |
| <i>NAGLU</i>   | Caudate | 1.80E-09   | 0.000167  | 0.263147 | other          | 0          |
| <i>NAGPA</i>   | Caudate | 2.35E-08   | 0.000254  | 0.094568 | other          | 0          |
| <i>NAP1L1</i>  | Caudate | 5.28E-12   | -0.00014  | 0.321804 | other          | 0          |
| <i>NARFL</i>   | Caudate | 5.30E-10   | 0.000485  | 0.000935 | other          | 0          |
| <i>NARG2</i>   | Caudate | 2.03E-10   | -0.00054  | 0.000216 | other          | 0          |
| <i>NASP</i>    | Caudate | 5.30E-13   | -0.00076  | 2.87E-09 | decreasing     | 0          |
| <i>NAT8L</i>   | Caudate | 3.98E-08   | 0.000516  | 0.000381 | other          | 0          |
| <i>NAT9</i>    | Caudate | 1.15E-07   | 0.000261  | 0.077694 | other          | 0          |
| <i>NAV3</i>    | Caudate | 8.82E-10   | -0.00055  | 8.59E-05 | decreasing     | 0          |
| <i>NBAS</i>    | Caudate | 2.05E-07   | -0.00026  | 0.075157 | other          | 1          |
| <i>NBL1</i>    | Caudate | 1.35E-09   | -0.00046  | 0.001516 | other          | 0          |
| <i>NCAPD2</i>  | Caudate | 1.09E-08   | 0.00043   | 0.003118 | other          | 0          |
| <i>NCAPG</i>   | Caudate | 2.76E-12   | -0.00079  | 8.75E-10 | decreasing     | 0          |
| <i>NCAPH2</i>  | Caudate | 1.13E-09   | 0.000483  | 0.000817 | other          | 0          |
| <i>NCDN</i>    | Caudate | 4.16E-14   | 0.000643  | 2.16E-06 | increasing     | 0          |
| <i>NCKIPSD</i> | Caudate | 2.09E-12   | 0.000853  | 2.61E-12 | increasing     | 0          |
| <i>NCLN</i>    | Caudate | 4.94E-09   | 0.000455  | 0.002028 | other          | 0          |
| <i>NCOA3</i>   | Caudate | 1.90E-14   | -0.00078  | 1.95E-09 | decreasing     | 0          |
| <i>NCR3LG1</i> | Caudate | 5.72E-09   | 0.000826  | 8.64E-11 | increasing     | 1          |
| <i>NDE1</i>    | Caudate | 6.60E-10   | 0.000837  | 7.57E-11 | increasing     | 0          |
| <i>NDFIP1</i>  | Caudate | 1.21E-09   | -0.00059  | 3.26E-05 | decreasing     | 0          |

**Supplementary Table 9. Genes with a significant age effect from either ANOVA or linear regression. Beta is the regression coefficient, Pval is the p-value for the regression coefficient of expression on age (in days). Effect category is increasing if beta is positive and significant, decreasing if beta is negative and significant, and other if the ANOVA were significant rather than the linear regression. Local eQTL is 1 if the gene had a significant local eQTL**

| Gene           | Tissue  | Anova.pval | Beta      | Pval     | EffectCategory | Local eQTL |
|----------------|---------|------------|-----------|----------|----------------|------------|
| <i>NDRG1</i>   | Caudate | 4.75E-18   | 0.000839  | 5.69E-12 | increasing     | 0          |
| <i>NDRG2</i>   | Caudate | 6.68E-08   | 0.000608  | 1.16E-05 | increasing     | 0          |
| <i>NDRG4</i>   | Caudate | 2.37E-08   | 0.000601  | 1.39E-05 | increasing     | 0          |
| <i>NDST3</i>   | Caudate | 6.65E-09   | -4.08E-05 | 0.786579 | other          | 0          |
| <i>NDUFC1</i>  | Caudate | 2.14E-07   | -0.0003   | 0.042095 | other          | 0          |
| <i>NDUFS7</i>  | Caudate | 6.67E-08   | 0.000436  | 0.003201 | other          | 0          |
| <i>NDUFV1</i>  | Caudate | 2.65E-09   | 0.000295  | 0.050647 | other          | 0          |
| <i>NEBL</i>    | Caudate | 3.65E-10   | -0.0003   | 0.042565 | other          | 0          |
| <i>NEFH</i>    | Caudate | 1.23E-09   | 0.000788  | 2.19E-09 | increasing     | 0          |
| <i>NEGR1</i>   | Caudate | 3.95E-07   | -0.0007   | 2.21E-07 | decreasing     | 0          |
| <i>NEIL1</i>   | Caudate | 1.77E-08   | 0.000498  | 0.000433 | other          | 0          |
| <i>NEK10</i>   | Caudate | 3.87E-10   | -0.00065  | 2.82E-06 | decreasing     | 0          |
| <i>NEK8</i>    | Caudate | 1.75E-09   | 0.00045   | 0.001333 | other          | 0          |
| <i>NELL2</i>   | Caudate | 4.32E-10   | -0.00079  | 9.38E-10 | decreasing     | 0          |
| <i>NEMF</i>    | Caudate | 1.51E-10   | -0.00044  | 0.002818 | other          | 0          |
| <i>NEURL1B</i> | Caudate | 5.46E-14   | -0.00031  | 0.033185 | other          | 0          |
| <i>NEURL4</i>  | Caudate | 3.32E-11   | 0.000538  | 0.000194 | other          | 0          |
| <i>NEXN</i>    | Caudate | 1.17E-08   | -0.00058  | 4.92E-05 | decreasing     | 0          |
| <i>NF2</i>     | Caudate | 1.04E-11   | 0.000642  | 4.67E-06 | increasing     | 0          |
| <i>NFATC3</i>  | Caudate | 3.37E-14   | 0.000221  | 0.135524 | other          | 0          |
| <i>NFE2L1</i>  | Caudate | 9.41E-09   | 0.000156  | 0.286583 | other          | 0          |
| <i>NFE2L2</i>  | Caudate | 1.53E-09   | 0.000169  | 0.265513 | other          | 0          |
| <i>NFYB</i>    | Caudate | 1.77E-07   | -0.00065  | 2.42E-06 | decreasing     | 0          |
| <i>NFYC</i>    | Caudate | 5.98E-09   | -1.18E-05 | 0.937501 | other          | 0          |
| <i>NGEF</i>    | Caudate | 8.34E-08   | -3.41E-05 | 0.823098 | other          | 0          |
| <i>NHS</i>     | Caudate | 6.40E-12   | -0.00076  | 1.42E-09 | decreasing     | 0          |
| <i>NIN</i>     | Caudate | 1.65E-08   | -0.0004   | 0.006271 | other          | 0          |
| <i>NIPAL4</i>  | Caudate | 6.39E-09   | 0.000707  | 1.21E-07 | increasing     | 0          |
| <i>NKAPL</i>   | Caudate | 2.56E-07   | 9.08E-05  | 0.546338 | other          | 0          |
| <i>NKIRAS2</i> | Caudate | 8.56E-08   | -0.00057  | 5.33E-05 | decreasing     | 0          |
| <i>NKPD1</i>   | Caudate | 2.05E-11   | 0.000546  | 0.000132 | other          | 0          |
| <i>NKX2.6</i>  | Caudate | 8.78E-07   | 0.000675  | 5.84E-10 | increasing     | 0          |
| <i>NKX3.1</i>  | Caudate | 6.75E-20   | 0.00088   | 7.76E-13 | increasing     | 0          |
| <i>NKX6.2</i>  | Caudate | 1.95E-11   | 0.000771  | 1.82E-09 | increasing     | 0          |
| <i>NLRX1</i>   | Caudate | 4.48E-10   | 0.000333  | 0.023201 | other          | 0          |
| <i>NMNAT3</i>  | Caudate | 1.30E-05   | 0.000742  | 3.52E-08 | increasing     | 1          |
| <i>NMRAL1</i>  | Caudate | 7.98E-08   | 0.000512  | 0.000426 | other          | 0          |
| <i>NMUR2</i>   | Caudate | 1.75E-08   | -0.00076  | 7.84E-09 | decreasing     | 0          |
| <i>NNT</i>     | Caudate | 1.53E-06   | -0.00076  | 1.41E-08 | decreasing     | 0          |
| <i>NOB1</i>    | Caudate | 9.04E-08   | 0.000713  | 1.75E-07 | increasing     | 1          |

**Supplementary Table 9. Genes with a significant age effect from either ANOVA or linear regression. Beta is the regression coefficient, Pval is the p-value for the regression coefficient of expression on age (in days). Effect category is increasing if beta is positive and significant, decreasing if beta is negative and significant, and other if the ANOVA were significant rather than the linear regression. Local eQTL is 1 if the gene had a significant local eQTL**

| Gene           | Tissue  | Anova.pval | Beta      | Pval     | EffectCategory | Local eQTL |
|----------------|---------|------------|-----------|----------|----------------|------------|
| <i>NOC4L</i>   | Caudate | 3.46E-08   | 0.000589  | 3.03E-05 | increasing     | 0          |
| <i>NOL11</i>   | Caudate | 2.24E-10   | -0.00082  | 7.06E-11 | decreasing     | 0          |
| <i>NOL3</i>    | Caudate | 1.03E-07   | 0.000715  | 1.58E-07 | increasing     | 0          |
| <i>NOL6</i>    | Caudate | 1.35E-11   | 0.000435  | 0.002995 | other          | 0          |
| <i>NONO</i>    | Caudate | 5.33E-09   | -0.00016  | 0.272764 | other          | 0          |
| <i>NOP14</i>   | Caudate | 2.89E-10   | 0.00055   | 8.31E-05 | increasing     | 0          |
| <i>NOTCH1</i>  | Caudate | 1.71E-08   | 0.000369  | 0.009613 | other          | 0          |
| <i>NPC1L1</i>  | Caudate | 2.88E-08   | 0.000702  | 1.44E-07 | increasing     | 0          |
| <i>NPFFR1</i>  | Caudate | 4.84E-08   | 0.00061   | 1.37E-05 | increasing     | 1          |
| <i>NPHP1</i>   | Caudate | 1.96E-08   | -0.00057  | 7.34E-05 | decreasing     | 0          |
| <i>NPHP4</i>   | Caudate | 2.43E-08   | 0.00072   | 8.10E-08 | increasing     | 0          |
| <i>NPHS1</i>   | Caudate | 7.58E-10   | 0.000708  | 1.16E-07 | increasing     | 0          |
| <i>NPLOC4</i>  | Caudate | 1.31E-08   | 0.000637  | 5.70E-06 | increasing     | 0          |
| <i>NPM3</i>    | Caudate | 1.63E-08   | 0.000684  | 5.98E-07 | increasing     | 0          |
| <i>NPTX1</i>   | Caudate | 2.66E-09   | 0.000767  | 8.41E-10 | increasing     | 1          |
| <i>NPTX2</i>   | Caudate | 3.91E-11   | -0.00082  | 1.31E-10 | decreasing     | 0          |
| <i>NQO1</i>    | Caudate | 2.35E-10   | 0.000628  | 5.18E-06 | increasing     | 0          |
| <i>NR1H2</i>   | Caudate | 1.81E-11   | 0.000672  | 9.40E-07 | increasing     | 0          |
| <i>NR2C2AP</i> | Caudate | 1.32E-08   | -0.00019  | 0.20828  | other          | 0          |
| <i>NR2F6</i>   | Caudate | 7.87E-10   | 0.000463  | 0.001567 | other          | 0          |
| <i>NR3C2</i>   | Caudate | 4.42E-13   | -9.09E-05 | 0.534826 | other          | 0          |
| <i>NRAS</i>    | Caudate | 4.61E-11   | -0.00074  | 8.58E-09 | decreasing     | 0          |
| <i>NRCAM</i>   | Caudate | 1.46E-07   | -0.00069  | 3.94E-07 | decreasing     | 0          |
| <i>NRD1</i>    | Caudate | 1.48E-09   | -0.00073  | 5.49E-08 | decreasing     | 0          |
| <i>NREP</i>    | Caudate | 1.04E-22   | -0.00092  | 2.39E-15 | decreasing     | 0          |
| <i>NRG2</i>    | Caudate | 2.23E-11   | 0.000657  | 2.50E-06 | increasing     | 0          |
| <i>NRGN</i>    | Caudate | 7.04E-09   | -5.89E-05 | 0.687797 | other          | 0          |
| <i>NRIP1</i>   | Caudate | 8.95E-11   | -0.00082  | 1.87E-10 | decreasing     | 0          |
| <i>NRP1</i>    | Caudate | 2.14E-11   | -0.00079  | 1.35E-09 | decreasing     | 0          |
| <i>NRXN1</i>   | Caudate | 3.96E-16   | -0.00085  | 4.88E-12 | decreasing     | 0          |
| <i>NRXN2</i>   | Caudate | 6.61E-10   | 4.76E-05  | 0.754153 | other          | 0          |
| <i>NSF</i>     | Caudate | 1.09E-10   | -4.24E-05 | 0.776762 | other          | 0          |
| <i>NSRP1</i>   | Caudate | 7.63E-08   | -0.00034  | 0.024064 | other          | 0          |
| <i>NT5C</i>    | Caudate | 4.47E-08   | 0.000328  | 0.024804 | other          | 0          |
| <i>NT5DC2</i>  | Caudate | 4.73E-10   | 0.000257  | 0.083241 | other          | 0          |
| <i>NT5DC3</i>  | Caudate | 5.54E-10   | 0.000727  | 2.99E-08 | increasing     | 0          |
| <i>NT5M</i>    | Caudate | 3.89E-13   | 0.000338  | 0.019893 | other          | 0          |
| <i>NTHL1</i>   | Caudate | 2.80E-09   | 8.06E-05  | 0.597597 | other          | 0          |
| <i>NTN4</i>    | Caudate | 1.15E-07   | 0.000738  | 3.31E-08 | increasing     | 1          |
| <i>NTSR2</i>   | Caudate | 9.07E-14   | 0.000776  | 2.03E-09 | increasing     | 0          |



**Supplementary Table 9. Genes with a significant age effect from either ANOVA or linear regression. Beta is the regression coefficient, Pval is the p-value for the regression coefficient of expression on age (in days). Effect category is increasing if beta is positive and significant, decreasing if beta is negative and significant, and other if the ANOVA were significant rather than the linear regression. Local eQTL is 1 if the gene had a significant local eQTL**

| Gene          | Tissue  | Anova.pval | Beta      | Pval     | EffectCategory | Local eQTL |
|---------------|---------|------------|-----------|----------|----------------|------------|
| <i>NUBP2</i>  | Caudate | 2.64E-10   | 0.000137  | 0.368745 | other          | 0          |
| <i>NUCB1</i>  | Caudate | 1.18E-10   | 0.000307  | 0.041504 | other          | 0          |
| <i>NUDC</i>   | Caudate | 3.55E-08   | 0.000207  | 0.169471 | other          | 0          |
| <i>NUDCD1</i> | Caudate | 4.12E-07   | -0.00074  | 3.32E-08 | decreasing     | 0          |
| <i>NUDCD3</i> | Caudate | 1.93E-14   | 0.000702  | 1.40E-07 | increasing     | 0          |
| <i>NUDT19</i> | Caudate | 3.96E-08   | -6.36E-05 | 0.668204 | other          | 0          |
| <i>NUDT4</i>  | Caudate | 3.43E-13   | -0.0008   | 6.80E-10 | decreasing     | 0          |
| <i>NUDT9</i>  | Caudate | 1.62E-09   | -0.00032  | 0.02921  | other          | 0          |
| <i>NUFIP1</i> | Caudate | 1.03E-08   | -0.0002   | 0.178459 | other          | 0          |
| <i>NUFIP2</i> | Caudate | 2.43E-08   | -0.00071  | 1.41E-07 | decreasing     | 0          |
| <i>NUMA1</i>  | Caudate | 1.21E-15   | 0.000798  | 1.02E-09 | increasing     | 0          |
| <i>NUMB</i>   | Caudate | 1.54E-12   | -0.00034  | 0.019295 | other          | 0          |
| <i>NUP153</i> | Caudate | 1.26E-07   | -0.00062  | 3.68E-06 | decreasing     | 0          |
| <i>NUP62</i>  | Caudate | 2.28E-09   | 0.000425  | 0.004003 | other          | 0          |
| <i>NUS1</i>   | Caudate | 1.97E-07   | -0.00058  | 4.28E-05 | decreasing     | 0          |
| <i>NXPH1</i>  | Caudate | 8.42E-09   | -0.00066  | 1.31E-06 | decreasing     | 0          |
| <i>NYAP2</i>  | Caudate | 5.16E-21   | -0.00087  | 9.37E-13 | decreasing     | 0          |
| <i>OAF</i>    | Caudate | 2.89E-11   | 0.000161  | 0.276002 | other          | 0          |
| <i>OARD1</i>  | Caudate | 3.22E-09   | 0.000103  | 0.496082 | other          | 1          |
| <i>OBSCN</i>  | Caudate | 1.33E-14   | 0.000845  | 1.22E-11 | increasing     | 1          |
| <i>OBSL1</i>  | Caudate | 7.99E-11   | 0.000424  | 0.002644 | other          | 0          |
| <i>ODF2L</i>  | Caudate | 1.41E-07   | -0.00071  | 7.56E-08 | decreasing     | 1          |
| <i>ODF3</i>   | Caudate | 3.06E-08   | 0.000774  | 3.56E-09 | increasing     | 0          |
| <i>OGDH</i>   | Caudate | 2.79E-10   | 0.000671  | 4.69E-07 | increasing     | 0          |
| <i>OGDHL</i>  | Caudate | 6.22E-12   | 0.000814  | 1.81E-10 | increasing     | 0          |
| <i>OGFOD2</i> | Caudate | 1.36E-07   | 0.000601  | 2.09E-05 | increasing     | 0          |
| <i>OGFR</i>   | Caudate | 3.44E-09   | 0.000428  | 0.003808 | other          | 0          |
| <i>OGFRL1</i> | Caudate | 1.30E-08   | -0.00068  | 5.50E-07 | decreasing     | 0          |
| <i>OPALIN</i> | Caudate | 4.84E-08   | 0.000635  | 2.49E-06 | increasing     | 0          |
| <i>OPCML</i>  | Caudate | 6.49E-12   | -0.00077  | 4.14E-09 | decreasing     | 0          |
| <i>OPLAH</i>  | Caudate | 3.66E-12   | 0.00076   | 1.32E-08 | increasing     | 0          |
| <i>OPRL1</i>  | Caudate | 6.08E-10   | 0.000755  | 1.14E-08 | increasing     | 0          |
| <i>ORAI2</i>  | Caudate | 1.66E-09   | 0.00014   | 0.345192 | other          | 0          |
| <i>ORAOV1</i> | Caudate | 1.95E-05   | 0.000722  | 1.03E-07 | increasing     | 0          |
| <i>OSBPL2</i> | Caudate | 2.25E-08   | 0.000398  | 0.0072   | other          | 0          |
| <i>OSBPL3</i> | Caudate | 2.86E-07   | -0.00076  | 1.66E-08 | decreasing     | 0          |
| <i>OSBPL6</i> | Caudate | 3.07E-08   | -0.00054  | 0.000143 | other          | 0          |
| <i>OSBPL7</i> | Caudate | 1.37E-08   | 0.000604  | 1.68E-05 | increasing     | 0          |
| <i>OSBPL8</i> | Caudate | 1.13E-09   | -0.00043  | 0.002652 | other          | 0          |
| <i>OSGIN1</i> | Caudate | 6.65E-08   | 0.000625  | 3.89E-06 | increasing     | 0          |

**Supplementary Table 9. Genes with a significant age effect from either ANOVA or linear regression. Beta is the regression coefficient, Pval is the p-value for the regression coefficient of expression on age (in days). Effect category is increasing if beta is positive and significant, decreasing if beta is negative and significant, and other if the ANOVA were significant rather than the linear regression. Local eQTL is 1 if the gene had a significant local eQTL**

| Gene            | Tissue  | Anova.pval | Beta     | Pval     | EffectCategory | Local eQTL |
|-----------------|---------|------------|----------|----------|----------------|------------|
| <i>OTOG</i>     | Caudate | 7.08E-13   | 0.000841 | 3.57E-11 | increasing     | 0          |
| <i>OTUD3</i>    | Caudate | 1.17E-14   | -0.00082 | 2.32E-10 | decreasing     | 0          |
| <i>OTUD4</i>    | Caudate | 2.92E-08   | -0.00066 | 1.71E-06 | decreasing     | 0          |
| <i>OTUD6B</i>   | Caudate | 6.70E-08   | -0.00064 | 5.31E-06 | decreasing     | 0          |
| <i>OTUD7A</i>   | Caudate | 5.82E-12   | 0.00047  | 0.001318 | other          | 0          |
| <i>OXCT1</i>    | Caudate | 3.31E-09   | -0.0007  | 4.94E-08 | decreasing     | 0          |
| <i>OXR1</i>     | Caudate | 3.70E-06   | -0.00071 | 2.05E-07 | decreasing     | 0          |
| <i>OXSR1</i>    | Caudate | 7.97E-05   | -0.00071 | 1.90E-07 | decreasing     | 0          |
| <i>P2RY1</i>    | Caudate | 2.31E-10   | -0.00071 | 1.07E-07 | decreasing     | 0          |
| <i>P2RY12</i>   | Caudate | 5.19E-12   | -0.00085 | 3.28E-12 | decreasing     | 0          |
| <i>P2RY13</i>   | Caudate | 7.88E-07   | -0.00071 | 2.38E-07 | decreasing     | 0          |
| <i>P4HTM</i>    | Caudate | 1.52E-09   | 0.000557 | 1.00E-04 | increasing     | 0          |
| <i>PAFAH1B3</i> | Caudate | 3.67E-10   | 0.000369 | 0.011764 | other          | 0          |
| <i>PAK3</i>     | Caudate | 2.57E-07   | -0.00042 | 0.003074 | other          | 0          |
| <i>PALM</i>     | Caudate | 1.24E-07   | 0.000641 | 3.62E-06 | increasing     | 0          |
| <i>PAN2</i>     | Caudate | 1.39E-08   | 0.000454 | 0.001197 | other          | 0          |
| <i>PANK1</i>    | Caudate | 6.58E-12   | -0.00085 | 6.18E-12 | decreasing     | 0          |
| <i>PANK3</i>    | Caudate | 1.06E-13   | -0.00086 | 6.88E-12 | decreasing     | 0          |
| <i>PANK4</i>    | Caudate | 4.95E-09   | 0.000429 | 0.003191 | other          | 0          |
| <i>PAOX</i>     | Caudate | 5.83E-10   | 0.000771 | 4.54E-09 | increasing     | 0          |
| <i>PAPD4</i>    | Caudate | 1.02E-08   | -0.00049 | 0.000774 | other          | 0          |
| <i>PAPLN</i>    | Caudate | 1.68E-09   | 0.000734 | 5.44E-08 | increasing     | 0          |
| <i>PAPOLA</i>   | Caudate | 3.02E-10   | -0.00061 | 1.88E-05 | decreasing     | 0          |
| <i>PAPOLG</i>   | Caudate | 7.69E-10   | -0.00057 | 6.41E-05 | decreasing     | 0          |
| <i>PAPSS1</i>   | Caudate | 1.17E-06   | -0.0007  | 1.41E-07 | decreasing     | 0          |
| <i>PAQR3</i>    | Caudate | 2.60E-10   | -0.00077 | 8.01E-09 | decreasing     | 0          |
| <i>PAQR6</i>    | Caudate | 1.60E-15   | 0.000832 | 1.07E-11 | increasing     | 0          |
| <i>PARP3</i>    | Caudate | 5.26E-08   | 0.000762 | 1.00E-08 | increasing     | 0          |
| <i>PARP6</i>    | Caudate | 3.50E-09   | -0.00059 | 1.95E-05 | decreasing     | 0          |
| <i>PARP8</i>    | Caudate | 4.62E-17   | -0.00083 | 6.52E-12 | decreasing     | 0          |
| <i>PARS2</i>    | Caudate | 2.11E-08   | 0.000133 | 0.370092 | other          | 1          |
| <i>PASK</i>     | Caudate | 5.59E-14   | 0.000638 | 2.64E-06 | increasing     | 0          |
| <i>PATZ1</i>    | Caudate | 7.10E-08   | 0.000275 | 0.060447 | other          | 0          |
| <i>PAXBP1</i>   | Caudate | 8.11E-09   | -0.00068 | 2.09E-07 | decreasing     | 0          |
| <i>PBRM1</i>    | Caudate | 6.82E-11   | -0.00059 | 1.40E-05 | decreasing     | 0          |
| <i>PBX3</i>     | Caudate | 5.35E-08   | -0.00078 | 4.72E-09 | decreasing     | 1          |
| <i>PC</i>       | Caudate | 6.44E-18   | 0.00085  | 3.37E-12 | increasing     | 0          |
| <i>PCBD1</i>    | Caudate | 1.34E-09   | 0.000673 | 1.18E-06 | increasing     | 0          |
| <i>PCBP4</i>    | Caudate | 1.03E-11   | 0.000763 | 9.53E-09 | increasing     | 0          |
| <i>PCDH11X</i>  | Caudate | 1.13E-15   | -0.00084 | 3.21E-11 | decreasing     | 0          |

**Supplementary Table 9. Genes with a significant age effect from either ANOVA or linear regression. Beta is the regression coefficient, Pval is the p-value for the regression coefficient of expression on age (in days). Effect category is increasing if beta is positive and significant, decreasing if beta is negative and significant, and other if the ANOVA were significant rather than the linear regression. Local eQTL is 1 if the gene had a significant local eQTL**

| Gene           | Tissue  | Anova.pval | Beta     | Pval     | EffectCategory | Local eQTL |
|----------------|---------|------------|----------|----------|----------------|------------|
| <i>PCDH15</i>  | Caudate | 2.38E-11   | -0.0008  | 4.04E-10 | decreasing     | 0          |
| <i>PCDH18</i>  | Caudate | 1.34E-09   | -0.00073 | 1.63E-08 | decreasing     | 1          |
| <i>PCDH8</i>   | Caudate | 2.58E-08   | 0.000656 | 2.58E-06 | increasing     | 0          |
| <i>PCDHB13</i> | Caudate | 5.55E-09   | -0.00056 | 6.22E-05 | decreasing     | 1          |
| <i>PCDHB14</i> | Caudate | 6.43E-14   | -0.00072 | 5.74E-08 | decreasing     | 0          |
| <i>PCED1A</i>  | Caudate | 1.75E-07   | 0.000378 | 0.008667 | other          | 0          |
| <i>PCGF3</i>   | Caudate | 9.14E-08   | -0.00068 | 2.80E-07 | decreasing     | 0          |
| <i>PCGF5</i>   | Caudate | 3.40E-12   | -0.00037 | 0.01387  | other          | 0          |
| <i>PCK1</i>    | Caudate | 1.47E-11   | 0.000818 | 2.59E-10 | increasing     | 0          |
| <i>PCMTD1</i>  | Caudate | 6.90E-12   | -0.00083 | 7.25E-11 | decreasing     | 0          |
| <i>PCNP</i>    | Caudate | 5.44E-11   | -0.00049 | 0.000636 | other          | 0          |
| <i>PCNT</i>    | Caudate | 2.03E-12   | 0.000855 | 1.14E-11 | increasing     | 0          |
| <i>PCP4</i>    | Caudate | 3.26E-08   | -0.00043 | 0.002282 | other          | 0          |
| <i>PCP4L1</i>  | Caudate | 1.54E-07   | -0.00049 | 0.000565 | other          | 0          |
| <i>PCSK6</i>   | Caudate | 5.23E-10   | 0.000759 | 1.14E-08 | increasing     | 0          |
| <i>PCSK7</i>   | Caudate | 2.57E-11   | 0.000282 | 0.062089 | other          | 0          |
| <i>PCYT2</i>   | Caudate | 5.22E-10   | 0.000707 | 2.41E-07 | increasing     | 0          |
| <i>PDCD11</i>  | Caudate | 5.76E-11   | 1.69E-05 | 0.910338 | other          | 0          |
| <i>PDCD6IP</i> | Caudate | 2.21E-09   | -0.00048 | 0.000648 | other          | 0          |
| <i>PDDC1</i>   | Caudate | 5.54E-10   | 0.00027  | 0.069996 | other          | 0          |
| <i>PDE10A</i>  | Caudate | 2.65E-08   | -0.00076 | 1.05E-08 | decreasing     | 0          |
| <i>PDE12</i>   | Caudate | 8.37E-07   | -0.00074 | 3.24E-08 | decreasing     | 0          |
| <i>PDE2A</i>   | Caudate | 1.22E-08   | -0.0003  | 0.04641  | other          | 0          |
| <i>PDE3A</i>   | Caudate | 4.12E-09   | -0.00076 | 6.64E-09 | decreasing     | 1          |
| <i>PDE3B</i>   | Caudate | 2.16E-08   | -0.00068 | 4.91E-07 | decreasing     | 0          |
| <i>PDE4B</i>   | Caudate | 2.53E-08   | -0.00011 | 0.449119 | other          | 0          |
| <i>PDE8A</i>   | Caudate | 5.12E-14   | 0.000803 | 1.79E-10 | increasing     | 0          |
| <i>PDF</i>     | Caudate | 2.00E-10   | 0.000498 | 0.000499 | other          | 0          |
| <i>PDGFA</i>   | Caudate | 1.55E-07   | 8.70E-06 | 0.953305 | other          | 0          |
| <i>PDGFRA</i>  | Caudate | 2.37E-14   | -0.00083 | 1.81E-11 | decreasing     | 0          |
| <i>PDHX</i>    | Caudate | 8.37E-07   | -0.00073 | 3.90E-08 | decreasing     | 0          |
| <i>PDIA2</i>   | Caudate | 8.50E-09   | 0.000563 | 3.57E-05 | increasing     | 0          |
| <i>PDK1</i>    | Caudate | 2.52E-08   | 0.000711 | 1.73E-07 | increasing     | 0          |
| <i>PDK2</i>    | Caudate | 1.28E-08   | 0.000616 | 4.14E-06 | increasing     | 0          |
| <i>PDXK</i>    | Caudate | 6.52E-10   | 0.000802 | 2.54E-10 | increasing     | 0          |
| <i>PDYN</i>    | Caudate | 8.19E-08   | -0.00026 | 0.084733 | other          | 0          |
| <i>PDZD11</i>  | Caudate | 5.18E-10   | -0.0001  | 0.498739 | other          | 0          |
| <i>PDZD4</i>   | Caudate | 1.31E-07   | 0.000321 | 0.033339 | other          | 0          |
| <i>PDZD8</i>   | Caudate | 1.07E-09   | -0.00056 | 0.000112 | other          | 0          |
| <i>PEBP1</i>   | Caudate | 3.55E-08   | 0.000577 | 3.91E-05 | increasing     | 0          |

**Supplementary Table 9. Genes with a significant age effect from either ANOVA or linear regression. Beta is the regression coefficient, Pval is the p-value for the regression coefficient of expression on age (in days). Effect category is increasing if beta is positive and significant, decreasing if beta is negative and significant, and other if the ANOVA were significant rather than the linear regression. Local eQTL is 1 if the gene had a significant local eQTL**

| Gene           | Tissue  | Anova.pval | Beta     | Pval     | EffectCategory | Local eQTL |
|----------------|---------|------------|----------|----------|----------------|------------|
| <i>PELI1</i>   | Caudate | 1.81E-09   | -0.00033 | 0.023285 | other          | 0          |
| <i>PELI3</i>   | Caudate | 1.01E-11   | 0.000572 | 3.76E-05 | increasing     | 0          |
| <i>PELP1</i>   | Caudate | 9.60E-08   | 0.000767 | 4.53E-09 | increasing     | 0          |
| <i>PEMT</i>    | Caudate | 3.49E-11   | 1.92E-05 | 0.89872  | other          | 0          |
| <i>PEX13</i>   | Caudate | 4.70E-07   | -0.0007  | 1.07E-07 | decreasing     | 0          |
| <i>PEX16</i>   | Caudate | 1.06E-09   | 0.000386 | 0.00884  | other          | 0          |
| <i>PEX26</i>   | Caudate | 5.04E-11   | 0.000761 | 1.04E-08 | increasing     | 0          |
| <i>PEX6</i>    | Caudate | 1.01E-07   | 0.000528 | 0.000124 | other          | 0          |
| <i>PFAS</i>    | Caudate | 6.57E-09   | 0.000516 | 0.000328 | other          | 0          |
| <i>PFKFB4</i>  | Caudate | 2.61E-11   | 0.000586 | 3.51E-05 | increasing     | 0          |
| <i>PFKL</i>    | Caudate | 1.63E-09   | 0.00059  | 3.43E-05 | increasing     | 0          |
| <i>PFKM</i>    | Caudate | 1.15E-08   | 0.000471 | 0.000862 | other          | 1          |
| <i>PFKP</i>    | Caudate | 1.11E-13   | 0.000745 | 3.20E-08 | increasing     | 0          |
| <i>PFN2</i>    | Caudate | 1.13E-12   | -0.00071 | 1.79E-07 | decreasing     | 0          |
| <i>PGAM5</i>   | Caudate | 5.14E-10   | 0.000343 | 0.020804 | other          | 0          |
| <i>PGAP1</i>   | Caudate | 2.53E-07   | -0.00062 | 8.90E-06 | decreasing     | 0          |
| <i>PGAP3</i>   | Caudate | 1.38E-07   | 0.000491 | 0.000599 | other          | 0          |
| <i>PGBD5</i>   | Caudate | 3.25E-14   | 0.000509 | 0.000234 | other          | 0          |
| <i>PGGT1B</i>  | Caudate | 3.62E-09   | -0.00067 | 8.66E-07 | decreasing     | 0          |
| <i>PGP</i>     | Caudate | 6.80E-09   | 0.000546 | 0.000136 | other          | 0          |
| <i>PGPEP1</i>  | Caudate | 2.40E-13   | 0.000762 | 3.41E-09 | increasing     | 0          |
| <i>PGR</i>     | Caudate | 6.45E-08   | -0.00061 | 1.75E-05 | decreasing     | 0          |
| <i>PGS1</i>    | Caudate | 6.97E-11   | 0.000561 | 9.40E-05 | increasing     | 0          |
| <i>PHC2</i>    | Caudate | 2.08E-10   | 0.000204 | 0.179136 | other          | 0          |
| <i>PHEX</i>    | Caudate | 1.45E-08   | -0.00072 | 1.14E-07 | decreasing     | 0          |
| <i>PHF1</i>    | Caudate | 1.09E-10   | 0.000712 | 9.38E-08 | increasing     | 0          |
| <i>PHF14</i>   | Caudate | 2.62E-13   | -0.00083 | 2.39E-11 | decreasing     | 0          |
| <i>PHF19</i>   | Caudate | 6.14E-09   | 0.000813 | 4.22E-10 | increasing     | 0          |
| <i>PHF20L1</i> | Caudate | 1.76E-07   | -0.00034 | 0.022596 | other          | 0          |
| <i>PHF21A</i>  | Caudate | 6.65E-13   | 0.000181 | 0.221285 | other          | 0          |
| <i>PHF3</i>    | Caudate | 1.06E-07   | -0.0006  | 1.91E-05 | decreasing     | 0          |
| <i>PHF6</i>    | Caudate | 1.58E-07   | -0.00075 | 1.79E-08 | decreasing     | 0          |
| <i>PHGDH</i>   | Caudate | 1.15E-08   | 0.000645 | 3.87E-06 | increasing     | 0          |
| <i>PHKG2</i>   | Caudate | 3.62E-08   | 0.000378 | 0.010308 | other          | 0          |
| <i>PHLDA3</i>  | Caudate | 5.09E-08   | 2.34E-05 | 0.877164 | other          | 0          |
| <i>PHLDB1</i>  | Caudate | 4.55E-11   | 0.000828 | 8.08E-11 | increasing     | 0          |
| <i>PHLPP1</i>  | Caudate | 3.26E-09   | 0.000771 | 1.27E-09 | increasing     | 0          |
| <i>PHRF1</i>   | Caudate | 4.48E-11   | 0.000667 | 1.55E-06 | increasing     | 0          |
| <i>PHTF2</i>   | Caudate | 1.31E-07   | -0.00073 | 7.66E-08 | decreasing     | 0          |
| <i>PHYHD1</i>  | Caudate | 6.06E-07   | 0.000773 | 5.26E-09 | increasing     | 0          |

**Supplementary Table 9. Genes with a significant age effect from either ANOVA or linear regression. Beta is the regression coefficient, Pval is the p-value for the regression coefficient of expression on age (in days). Effect category is increasing if beta is positive and significant, decreasing if beta is negative and significant, and other if the ANOVA were significant rather than the linear regression. Local eQTL is 1 if the gene had a significant local eQTL**

| Gene           | Tissue  | Anova.pval | Beta     | Pval     | EffectCategory | Local eQTL |
|----------------|---------|------------|----------|----------|----------------|------------|
| <i>PHYHIP</i>  | Caudate | 1.04E-14   | 0.00081  | 1.06E-10 | increasing     | 0          |
| <i>PHYHIPL</i> | Caudate | 7.36E-11   | -0.00064 | 2.82E-06 | decreasing     | 0          |
| <i>PHYKPL</i>  | Caudate | 1.77E-07   | 0.000685 | 6.85E-07 | increasing     | 0          |
| <i>PI4KA</i>   | Caudate | 3.83E-06   | 0.000705 | 1.18E-07 | increasing     | 0          |
| <i>PIAS1</i>   | Caudate | 1.07E-09   | -0.00023 | 0.118768 | other          | 0          |
| <i>PIAS2</i>   | Caudate | 1.67E-10   | -0.0006  | 2.09E-05 | decreasing     | 0          |
| <i>PIAS4</i>   | Caudate | 6.26E-08   | 0.000264 | 0.075767 | other          | 0          |
| <i>PICK1</i>   | Caudate | 2.64E-08   | 0.000368 | 0.012666 | other          | 0          |
| <i>PIDD1</i>   | Caudate | 1.14E-07   | 0.000531 | 0.000111 | other          | 1          |
| <i>PIK3C3</i>  | Caudate | 4.70E-09   | -0.00015 | 0.306723 | other          | 0          |
| <i>PIK3CA</i>  | Caudate | 9.55E-11   | -0.00081 | 4.45E-10 | decreasing     | 0          |
| <i>PIKFYVE</i> | Caudate | 6.37E-12   | -0.00077 | 7.04E-09 | decreasing     | 0          |
| <i>PINK1</i>   | Caudate | 4.48E-08   | 0.000516 | 0.000364 | other          | 0          |
| <i>PIP4K2A</i> | Caudate | 1.61E-20   | 0.000877 | 1.23E-13 | increasing     | 0          |
| <i>PIP4K2B</i> | Caudate | 2.61E-13   | 0.000779 | 1.08E-09 | increasing     | 0          |
| <i>PIP4K2C</i> | Caudate | 1.65E-08   | 0.000637 | 4.07E-06 | increasing     | 0          |
| <i>PIR</i>     | Caudate | 5.34E-08   | 0.00067  | 9.55E-07 | increasing     | 0          |
| <i>PITPNC1</i> | Caudate | 2.24E-08   | -0.00068 | 1.12E-06 | decreasing     | 0          |
| <i>PITPNM1</i> | Caudate | 2.14E-11   | 0.000706 | 2.32E-07 | increasing     | 0          |
| <i>PITPNM3</i> | Caudate | 1.21E-09   | 0.000703 | 2.22E-07 | increasing     | 0          |
| <i>PJA2</i>    | Caudate | 1.33E-09   | -0.00037 | 0.008725 | other          | 0          |
| <i>PKD1</i>    | Caudate | 6.32E-12   | 0.000698 | 3.76E-07 | increasing     | 0          |
| <i>PKD1L2</i>  | Caudate | 6.77E-08   | 0.000376 | 0.010741 | other          | 0          |
| <i>PKN1</i>    | Caudate | 8.28E-12   | 0.00028  | 0.058816 | other          | 0          |
| <i>PKN2</i>    | Caudate | 1.69E-09   | -0.00064 | 3.90E-06 | decreasing     | 0          |
| <i>PLA2G16</i> | Caudate | 5.31E-14   | 0.000792 | 7.88E-10 | increasing     | 0          |
| <i>PLA2G4B</i> | Caudate | 1.89E-08   | 0.000595 | 2.48E-05 | increasing     | 0          |
| <i>PLA2G6</i>  | Caudate | 6.84E-11   | 0.000807 | 5.39E-10 | increasing     | 0          |
| <i>PLAC9</i>   | Caudate | 2.01E-09   | 0.000127 | 0.38556  | other          | 0          |
| <i>PLB1</i>    | Caudate | 1.62E-08   | 0.000663 | 9.62E-07 | increasing     | 0          |
| <i>PLCB1</i>   | Caudate | 8.57E-09   | -0.00047 | 0.001139 | other          | 0          |
| <i>PLCB4</i>   | Caudate | 1.02E-09   | -0.00077 | 5.83E-09 | decreasing     | 0          |
| <i>PLCG1</i>   | Caudate | 1.60E-12   | 0.000479 | 0.00059  | other          | 0          |
| <i>PLCXD3</i>  | Caudate | 4.79E-10   | -0.00069 | 3.05E-07 | decreasing     | 0          |
| <i>PLD1</i>    | Caudate | 5.92E-06   | 0.000703 | 1.69E-07 | increasing     | 0          |
| <i>PLD2</i>    | Caudate | 4.45E-08   | 0.00071  | 1.02E-07 | increasing     | 0          |
| <i>PLD3</i>    | Caudate | 3.63E-10   | 0.000498 | 0.000467 | other          | 0          |
| <i>PLD5</i>    | Caudate | 5.79E-14   | -0.00071 | 1.14E-07 | decreasing     | 0          |
| <i>PLD6</i>    | Caudate | 6.18E-07   | 0.00077  | 6.66E-09 | increasing     | 0          |
| <i>PLEC</i>    | Caudate | 2.72E-11   | 0.000659 | 2.18E-06 | increasing     | 0          |

**Supplementary Table 9. Genes with a significant age effect from either ANOVA or linear regression. Beta is the regression coefficient, Pval is the p-value for the regression coefficient of expression on age (in days). Effect category is increasing if beta is positive and significant, decreasing if beta is negative and significant, and other if the ANOVA were significant rather than the linear regression. Local eQTL is 1 if the gene had a significant local eQTL**

| Gene           | Tissue  | Anova.pval | Beta     | Pval     | EffectCategory | Local eQTL |
|----------------|---------|------------|----------|----------|----------------|------------|
| <i>PLEK</i>    | Caudate | 2.12E-07   | 0.000755 | 8.58E-09 | increasing     | 0          |
| <i>PLEKHA2</i> | Caudate | 1.58E-09   | 0.000771 | 6.49E-10 | increasing     | 0          |
| <i>PLEKHA3</i> | Caudate | 4.87E-15   | -0.0002  | 0.176571 | other          | 0          |
| <i>PLEKHA5</i> | Caudate | 9.20E-10   | -0.00059 | 2.97E-05 | decreasing     | 0          |
| <i>PLEKHB1</i> | Caudate | 1.21E-14   | 0.00075  | 2.82E-09 | increasing     | 0          |
| <i>PLEKHF1</i> | Caudate | 7.47E-09   | 0.000723 | 5.84E-08 | increasing     | 0          |
| <i>PLEKHF2</i> | Caudate | 1.08E-06   | -0.00068 | 2.29E-07 | decreasing     | 0          |
| <i>PLEKHG3</i> | Caudate | 3.38E-14   | 0.000866 | 3.89E-12 | increasing     | 0          |
| <i>PLEKHG4</i> | Caudate | 2.69E-11   | 0.000814 | 2.12E-10 | increasing     | 0          |
| <i>PLEKHH1</i> | Caudate | 2.26E-16   | 0.000871 | 2.38E-13 | increasing     | 0          |
| <i>PLEKHJ1</i> | Caudate | 9.53E-09   | 0.000123 | 0.417047 | other          | 0          |
| <i>PLEKHM2</i> | Caudate | 1.31E-09   | 0.000814 | 2.46E-10 | increasing     | 0          |
| <i>PLEKHO2</i> | Caudate | 9.30E-08   | 0.000568 | 4.44E-05 | increasing     | 0          |
| <i>PLGRKT</i>  | Caudate | 1.12E-08   | -0.0007  | 1.43E-07 | decreasing     | 0          |
| <i>PLIN3</i>   | Caudate | 9.69E-12   | 0.000531 | 0.000155 | other          | 0          |
| <i>PLIN4</i>   | Caudate | 6.86E-06   | 0.000727 | 7.31E-08 | increasing     | 0          |
| <i>PLK2</i>    | Caudate | 3.89E-08   | -0.00067 | 6.09E-07 | decreasing     | 0          |
| <i>PLL P</i>   | Caudate | 1.62E-08   | 0.000682 | 3.36E-07 | increasing     | 0          |
| <i>PLN</i>     | Caudate | 8.80E-10   | -0.00077 | 8.18E-09 | decreasing     | 0          |
| <i>PLXNB1</i>  | Caudate | 1.08E-08   | 0.00073  | 6.12E-08 | increasing     | 0          |
| <i>PLXNB3</i>  | Caudate | 7.53E-08   | 0.00073  | 7.42E-08 | increasing     | 0          |
| <i>PMEL</i>    | Caudate | 5.31E-16   | 0.000886 | 1.52E-13 | increasing     | 0          |
| <i>PMEPA1</i>  | Caudate | 5.60E-08   | -0.00074 | 3.48E-08 | decreasing     | 0          |
| <i>PMF1</i>    | Caudate | 3.16E-08   | 0.000307 | 0.039825 | other          | 0          |
| <i>PMP22</i>   | Caudate | 2.11E-10   | 0.000599 | 1.73E-05 | increasing     | 0          |
| <i>PMPCA</i>   | Caudate | 3.06E-08   | 0.000439 | 0.002537 | other          | 0          |
| <i>PMVK</i>    | Caudate | 2.39E-07   | 0.000707 | 2.36E-07 | increasing     | 0          |
| <i>PNCK</i>    | Caudate | 1.09E-09   | 0.000782 | 2.79E-09 | increasing     | 0          |
| <i>PNISR</i>   | Caudate | 9.86E-08   | -0.00065 | 2.38E-06 | decreasing     | 0          |
| <i>PNKD</i>    | Caudate | 3.25E-14   | 0.000688 | 1.22E-07 | increasing     | 0          |
| <i>PNKP</i>    | Caudate | 2.15E-07   | 0.000632 | 5.35E-06 | increasing     | 0          |
| <i>PNMA2</i>   | Caudate | 1.23E-07   | 0.000674 | 7.99E-07 | increasing     | 1          |
| <i>PNMA3</i>   | Caudate | 3.35E-09   | 0.000359 | 0.011863 | other          | 0          |
| <i>PNMAL1</i>  | Caudate | 2.63E-12   | 0.000402 | 0.006463 | other          | 0          |
| <i>PNMAL2</i>  | Caudate | 1.33E-10   | 0.000623 | 9.82E-06 | increasing     | 0          |
| <i>PNPLA2</i>  | Caudate | 9.71E-11   | 0.000779 | 2.17E-09 | increasing     | 0          |
| <i>PNPLA6</i>  | Caudate | 1.28E-10   | 0.000673 | 1.25E-06 | increasing     | 0          |
| <i>PNRC1</i>   | Caudate | 8.82E-09   | 0.000431 | 0.002724 | other          | 0          |
| <i>PNRC2</i>   | Caudate | 2.08E-07   | -0.00055 | 0.000122 | other          | 0          |
| <i>PODXL2</i>  | Caudate | 1.45E-12   | -0.0001  | 0.497241 | other          | 0          |

**Supplementary Table 9. Genes with a significant age effect from either ANOVA or linear regression. Beta is the regression coefficient, Pval is the p-value for the regression coefficient of expression on age (in days). Effect category is increasing if beta is positive and significant, decreasing if beta is negative and significant, and other if the ANOVA were significant rather than the linear regression. Local eQTL is 1 if the gene had a significant local eQTL**

| Gene            | Tissue  | Anova.pval | Beta      | Pval     | EffectCategory | Local eQTL |
|-----------------|---------|------------|-----------|----------|----------------|------------|
| <i>POLA1</i>    | Caudate | 7.00E-08   | -0.00065  | 1.70E-06 | decreasing     | 0          |
| <i>POLD2</i>    | Caudate | 1.63E-07   | -4.81E-06 | 0.974607 | other          | 0          |
| <i>POLG</i>     | Caudate | 7.40E-11   | 0.000497  | 0.000626 | other          | 0          |
| <i>POLG2</i>    | Caudate | 2.15E-08   | -0.00027  | 0.072643 | other          | 0          |
| <i>POLK</i>     | Caudate | 4.78E-09   | -0.00035  | 0.020041 | other          | 0          |
| <i>POLR3E</i>   | Caudate | 1.17E-11   | 0.000379  | 0.009079 | other          | 0          |
| <i>POLR3H</i>   | Caudate | 1.23E-13   | -6.69E-05 | 0.652366 | other          | 0          |
| <i>POLRMT</i>   | Caudate | 1.33E-11   | 0.000504  | 0.000535 | other          | 0          |
| <i>POMT2</i>    | Caudate | 7.02E-08   | 0.000495  | 0.000695 | other          | 0          |
| <i>POPDC3</i>   | Caudate | 1.63E-15   | 0.000873  | 9.50E-13 | increasing     | 0          |
| <i>POU3F1</i>   | Caudate | 6.50E-08   | 3.15E-05  | 0.837424 | other          | 0          |
| <i>POU3F3</i>   | Caudate | 2.41E-11   | 0.000248  | 0.091503 | other          | 0          |
| <i>POU3F4</i>   | Caudate | 4.82E-08   | 0.000508  | 0.000454 | other          | 0          |
| <i>PPAP2C</i>   | Caudate | 1.33E-11   | 0.000794  | 3.59E-10 | increasing     | 0          |
| <i>PPAPDC3</i>  | Caudate | 3.21E-11   | 0.000223  | 0.142317 | other          | 0          |
| <i>PPEF1</i>    | Caudate | 1.28E-07   | -0.00062  | 3.91E-06 | decreasing     | 0          |
| <i>PPFIA2</i>   | Caudate | 1.09E-11   | -0.00079  | 4.45E-10 | decreasing     | 0          |
| <i>PPFIA3</i>   | Caudate | 4.99E-12   | 5.39E-05  | 0.719843 | other          | 0          |
| <i>PPFIA4</i>   | Caudate | 1.69E-14   | 0.000808  | 1.22E-10 | increasing     | 0          |
| <i>PPFIBP2</i>  | Caudate | 9.16E-10   | 0.000739  | 1.44E-08 | increasing     | 0          |
| <i>PPIP5K1</i>  | Caudate | 1.02E-09   | 0.000728  | 1.16E-08 | increasing     | 0          |
| <i>PPL</i>      | Caudate | 2.31E-07   | 0.000741  | 3.31E-08 | increasing     | 0          |
| <i>PPM1A</i>    | Caudate | 3.14E-11   | -0.00056  | 5.86E-05 | decreasing     | 0          |
| <i>PPM1B</i>    | Caudate | 1.70E-13   | -0.00075  | 1.72E-08 | decreasing     | 0          |
| <i>PPM1E</i>    | Caudate | 2.47E-08   | -0.00047  | 0.00094  | other          | 0          |
| <i>PPM1F</i>    | Caudate | 4.64E-10   | 0.000772  | 6.76E-09 | increasing     | 0          |
| <i>PPM1K</i>    | Caudate | 2.45E-07   | 0.000593  | 2.30E-05 | increasing     | 0          |
| <i>PPM1M</i>    | Caudate | 6.37E-13   | 0.000723  | 4.36E-08 | increasing     | 0          |
| <i>PPOX</i>     | Caudate | 1.34E-07   | 0.000226  | 0.129306 | other          | 0          |
| <i>PPP1R12C</i> | Caudate | 5.69E-11   | 0.000637  | 3.44E-06 | increasing     | 0          |
| <i>PPP1R14A</i> | Caudate | 4.88E-10   | 0.000753  | 1.82E-08 | increasing     | 0          |
| <i>PPP1R14B</i> | Caudate | 4.14E-09   | 7.28E-05  | 0.619755 | other          | 0          |
| <i>PPP1R16A</i> | Caudate | 1.10E-08   | 0.000296  | 0.048907 | other          | 1          |
| <i>PPP1R1B</i>  | Caudate | 1.52E-08   | -0.0001   | 0.501057 | other          | 0          |
| <i>PPP1R26</i>  | Caudate | 1.18E-07   | 0.000451  | 0.002055 | other          | 0          |
| <i>PPP1R37</i>  | Caudate | 1.26E-10   | 0.000535  | 0.0002   | other          | 0          |
| <i>PPP1R3C</i>  | Caudate | 7.87E-08   | -8.56E-05 | 0.568674 | other          | 0          |
| <i>PPP1R3E</i>  | Caudate | 2.69E-08   | 0.000775  | 5.31E-09 | increasing     | 0          |
| <i>PPP1R3F</i>  | Caudate | 3.32E-08   | 0.000495  | 0.000687 | other          | 0          |
| <i>PPP2CA</i>   | Caudate | 1.59E-05   | -0.00071  | 1.30E-07 | decreasing     | 0          |

**Supplementary Table 9. Genes with a significant age effect from either ANOVA or linear regression. Beta is the regression coefficient, Pval is the p-value for the regression coefficient of expression on age (in days). Effect category is increasing if beta is positive and significant, decreasing if beta is negative and significant, and other if the ANOVA were significant rather than the linear regression. Local eQTL is 1 if the gene had a significant local eQTL**

| Gene            | Tissue  | Anova.pval | Beta      | Pval     | EffectCategory | Local eQTL |
|-----------------|---------|------------|-----------|----------|----------------|------------|
| <i>PPP2R1A</i>  | Caudate | 2.19E-09   | -3.95E-05 | 0.794753 | other          | 0          |
| <i>PPP2R4</i>   | Caudate | 1.06E-08   | -1.16E-05 | 0.939845 | other          | 0          |
| <i>PPP2R5B</i>  | Caudate | 2.65E-09   | 0.000532  | 0.000214 | other          | 0          |
| <i>PPP2R5E</i>  | Caudate | 5.35E-09   | -0.00074  | 3.37E-08 | decreasing     | 0          |
| <i>PPP3R1</i>   | Caudate | 1.58E-12   | -0.00016  | 0.283824 | other          | 0          |
| <i>PPP4C</i>    | Caudate | 4.84E-08   | 8.50E-05  | 0.575878 | other          | 0          |
| <i>PPP5C</i>    | Caudate | 5.33E-11   | -3.58E-05 | 0.811541 | other          | 0          |
| <i>PPP6C</i>    | Caudate | 1.53E-09   | -0.00028  | 0.058545 | other          | 0          |
| <i>PPP6R2</i>   | Caudate | 1.58E-08   | 9.41E-05  | 0.536701 | other          | 0          |
| <i>PQLC2</i>    | Caudate | 8.07E-09   | 0.000172  | 0.248958 | other          | 0          |
| <i>PREX1</i>    | Caudate | 1.75E-07   | 0.000258  | 0.08908  | other          | 0          |
| <i>PREX2</i>    | Caudate | 6.34E-08   | -0.00032  | 0.025378 | other          | 0          |
| <i>PRICKLE1</i> | Caudate | 2.45E-12   | -0.00069  | 3.53E-07 | decreasing     | 0          |
| <i>PRICKLE2</i> | Caudate | 8.14E-14   | -0.00075  | 1.11E-08 | decreasing     | 0          |
| <i>PRKAA2</i>   | Caudate | 6.59E-11   | -0.00083  | 1.77E-11 | decreasing     | 0          |
| <i>PRKACB</i>   | Caudate | 6.50E-08   | -0.00064  | 4.57E-06 | decreasing     | 0          |
| <i>PRKAG2</i>   | Caudate | 2.66E-12   | -0.00031  | 0.030552 | other          | 0          |
| <i>PRKAR1B</i>  | Caudate | 6.35E-08   | 0.000182  | 0.230575 | other          | 1          |
| <i>PRKAR2B</i>  | Caudate | 4.37E-09   | -0.00073  | 2.57E-08 | decreasing     | 0          |
| <i>PRKCB</i>    | Caudate | 2.36E-07   | -0.00049  | 0.000573 | other          | 0          |
| <i>PRKCDBP</i>  | Caudate | 7.37E-10   | 0.000576  | 3.28E-05 | increasing     | 0          |
| <i>PRKCE</i>    | Caudate | 1.60E-13   | -0.00081  | 2.86E-10 | decreasing     | 0          |
| <i>PRKCQ</i>    | Caudate | 2.95E-20   | 0.000886  | 9.73E-14 | increasing     | 0          |
| <i>PRKCSH</i>   | Caudate | 1.33E-08   | 0.000527  | 0.000278 | other          | 0          |
| <i>PRMT7</i>    | Caudate | 2.38E-09   | 0.000169  | 0.270138 | other          | 0          |
| <i>PRPF19</i>   | Caudate | 4.28E-12   | 0.000841  | 1.83E-12 | increasing     | 0          |
| <i>PRPF38B</i>  | Caudate | 2.02E-08   | -0.00017  | 0.264548 | other          | 0          |
| <i>PRPF40B</i>  | Caudate | 2.29E-08   | 0.000245  | 0.095599 | other          | 0          |
| <i>PRPF4B</i>   | Caudate | 4.69E-08   | -0.00071  | 1.56E-07 | decreasing     | 0          |
| <i>PRPF6</i>    | Caudate | 6.39E-11   | 0.000711  | 1.94E-07 | increasing     | 0          |
| <i>PRPS1</i>    | Caudate | 1.47E-09   | -1.56E-05 | 0.916863 | other          | 0          |
| <i>PRR13</i>    | Caudate | 6.47E-11   | 0.000248  | 0.087338 | other          | 0          |
| <i>PRR18</i>    | Caudate | 1.04E-08   | 0.000739  | 2.47E-08 | increasing     | 0          |
| <i>PRR24</i>    | Caudate | 1.13E-09   | 0.000327  | 0.024594 | other          | 0          |
| <i>PRR5</i>     | Caudate | 9.89E-08   | 0.000176  | 0.243871 | other          | 0          |
| <i>PRR5L</i>    | Caudate | 8.43E-14   | 0.000874  | 2.90E-12 | increasing     | 0          |
| <i>PRRG3</i>    | Caudate | 4.27E-06   | 0.00071   | 2.06E-07 | increasing     | 0          |
| <i>PRRT2</i>    | Caudate | 6.17E-09   | 0.000339  | 0.020827 | other          | 0          |
| <i>PRSS2</i>    | Caudate | 1.95E-08   | 0.000724  | 4.77E-08 | increasing     | 0          |
| <i>PRSS21</i>   | Caudate | 5.77E-11   | 0.00081   | 3.02E-10 | increasing     | 0          |



**Supplementary Table 9. Genes with a significant age effect from either ANOVA or linear regression. Beta is the regression coefficient, Pval is the p-value for the regression coefficient of expression on age (in days). Effect category is increasing if beta is positive and significant, decreasing if beta is negative and significant, and other if the ANOVA were significant rather than the linear regression. Local eQTL is 1 if the gene had a significant local eQTL**

| Gene          | Tissue  | Anova.pval | Beta     | Pval     | EffectCategory | Local eQTL |
|---------------|---------|------------|----------|----------|----------------|------------|
| <i>PRSS41</i> | Caudate | 2.27E-09   | 0.000776 | 4.45E-09 | increasing     | 0          |
| <i>PRUNE2</i> | Caudate | 2.74E-15   | 0.000871 | 2.58E-13 | increasing     | 0          |
| <i>PSD</i>    | Caudate | 6.49E-08   | 0.000594 | 2.80E-05 | increasing     | 0          |
| <i>PSMC5</i>  | Caudate | 1.90E-10   | 0.000132 | 0.373468 | other          | 0          |
| <i>PSMD12</i> | Caudate | 5.80E-09   | -0.00063 | 4.99E-06 | decreasing     | 0          |
| <i>PSME4</i>  | Caudate | 2.37E-09   | -0.00077 | 4.28E-09 | decreasing     | 0          |
| <i>PSRC1</i>  | Caudate | 1.28E-07   | 0.000753 | 1.84E-08 | increasing     | 0          |
| <i>PTAR1</i>  | Caudate | 1.51E-07   | -0.00072 | 5.78E-08 | decreasing     | 0          |
| <i>PTBP3</i>  | Caudate | 2.39E-07   | -0.00066 | 1.77E-06 | decreasing     | 0          |
| <i>PTCD1</i>  | Caudate | 3.76E-08   | 0.000333 | 0.026589 | other          | 0          |
| <i>PTCHD1</i> | Caudate | 1.07E-05   | -0.0007  | 1.13E-07 | decreasing     | 0          |
| <i>PTCHD2</i> | Caudate | 3.38E-12   | 0.000717 | 1.10E-07 | increasing     | 0          |
| <i>PTDSS2</i> | Caudate | 1.99E-08   | 0.000323 | 0.024195 | other          | 0          |
| <i>PTEN</i>   | Caudate | 2.54E-13   | -0.00085 | 4.17E-12 | decreasing     | 0          |
| <i>PTF1A</i>  | Caudate | 6.08E-13   | 0.000749 | 1.24E-08 | increasing     | 0          |
| <i>PTGDS</i>  | Caudate | 7.06E-10   | 0.000509 | 0.000311 | other          | 0          |
| <i>PTGER3</i> | Caudate | 8.67E-08   | -0.00057 | 4.32E-05 | decreasing     | 0          |
| <i>PTGES2</i> | Caudate | 5.28E-09   | 0.000281 | 0.063666 | other          | 0          |
| <i>PTGES3</i> | Caudate | 2.51E-13   | -0.00011 | 0.470677 | other          | 0          |
| <i>PTGFRN</i> | Caudate | 1.94E-09   | -0.00033 | 0.02406  | other          | 0          |
| <i>PTN</i>    | Caudate | 1.17E-11   | -0.00086 | 1.70E-12 | decreasing     | 0          |
| <i>PTOV1</i>  | Caudate | 1.13E-13   | 0.000691 | 4.66E-07 | increasing     | 0          |
| <i>PTP4A1</i> | Caudate | 6.26E-08   | -0.00068 | 8.42E-07 | decreasing     | 0          |
| <i>PTP4A3</i> | Caudate | 6.24E-08   | 8.37E-05 | 0.577278 | other          | 0          |
| <i>PTPDC1</i> | Caudate | 5.32E-13   | 0.000845 | 3.30E-12 | increasing     | 0          |
| <i>PTPN14</i> | Caudate | 2.03E-05   | 0.000704 | 1.73E-07 | increasing     | 0          |
| <i>PTPN4</i>  | Caudate | 2.06E-08   | -0.0008  | 1.08E-09 | decreasing     | 0          |
| <i>PTPN5</i>  | Caudate | 1.87E-14   | 0.000618 | 5.29E-06 | increasing     | 0          |
| <i>PTPN7</i>  | Caudate | 1.73E-11   | 0.000494 | 0.00049  | other          | 0          |
| <i>PTPRB</i>  | Caudate | 1.80E-08   | 0.000481 | 0.000544 | other          | 0          |
| <i>PTPRC</i>  | Caudate | 3.23E-07   | -0.0007  | 2.29E-07 | decreasing     | 0          |
| <i>PTPRD</i>  | Caudate | 7.60E-08   | -0.00063 | 7.02E-06 | decreasing     | 0          |
| <i>PTPRQ</i>  | Caudate | 3.80E-09   | -0.00062 | 1.37E-05 | decreasing     | 0          |
| <i>PTPRT</i>  | Caudate | 1.06E-07   | -0.00059 | 3.02E-05 | decreasing     | 0          |
| <i>PTPRU</i>  | Caudate | 1.34E-11   | 0.000518 | 0.000322 | other          | 1          |
| <i>PTPRZ1</i> | Caudate | 1.51E-08   | -0.00056 | 5.65E-05 | decreasing     | 0          |
| <i>PTRF</i>   | Caudate | 3.75E-08   | 0.000652 | 1.17E-06 | increasing     | 0          |
| <i>PUF60</i>  | Caudate | 1.07E-08   | 0.000356 | 0.015735 | other          | 0          |
| <i>PURB</i>   | Caudate | 9.49E-09   | -0.00067 | 1.30E-06 | decreasing     | 0          |
| <i>PURG</i>   | Caudate | 2.44E-10   | -0.00079 | 1.36E-09 | decreasing     | 0          |

**Supplementary Table 9. Genes with a significant age effect from either ANOVA or linear regression. Beta is the regression coefficient, Pval is the p-value for the regression coefficient of expression on age (in days). Effect category is increasing if beta is positive and significant, decreasing if beta is negative and significant, and other if the ANOVA were significant rather than the linear regression. Local eQTL is 1 if the gene had a significant local eQTL**

| Gene             | Tissue  | Anova.pval | Beta     | Pval     | EffectCategory | Local eQTL |
|------------------|---------|------------|----------|----------|----------------|------------|
| <i>PUSL1</i>     | Caudate | 3.21E-10   | 0.000385 | 0.007492 | other          | 0          |
| <i>PVRL3</i>     | Caudate | 4.70E-15   | -0.00079 | 3.91E-10 | decreasing     | 0          |
| <i>PWP2</i>      | Caudate | 3.48E-09   | 0.000673 | 1.22E-06 | increasing     | 1          |
| <i>PWWP2A</i>    | Caudate | 4.45E-07   | -0.00072 | 1.02E-07 | decreasing     | 0          |
| <i>PWWP2B</i>    | Caudate | 1.32E-09   | 0.000446 | 0.002402 | other          | 0          |
| <i>PXK</i>       | Caudate | 1.95E-13   | 0.000726 | 4.22E-08 | increasing     | 0          |
| <i>PYCR1</i>     | Caudate | 1.15E-09   | 3.97E-05 | 0.795843 | other          | 0          |
| <i>PYGO1</i>     | Caudate | 2.94E-09   | -0.00071 | 7.46E-08 | decreasing     | 0          |
| <i>QARS</i>      | Caudate | 2.05E-08   | 0.000249 | 0.091316 | other          | 0          |
| <i>QDPR</i>      | Caudate | 1.77E-14   | 0.000701 | 5.92E-08 | increasing     | 1          |
| <i>QSOX1</i>     | Caudate | 4.98E-12   | 0.000532 | 0.000203 | other          | 1          |
| <i>QSOX2</i>     | Caudate | 1.48E-10   | 4.42E-05 | 0.770481 | other          | 0          |
| <i>RAB11FIP2</i> | Caudate | 2.41E-09   | -0.00071 | 1.61E-07 | decreasing     | 0          |
| <i>RAB11FIP3</i> | Caudate | 1.41E-08   | 0.000679 | 7.10E-07 | increasing     | 0          |
| <i>RAB11FIP4</i> | Caudate | 2.16E-07   | 0.000426 | 0.003951 | other          | 0          |
| <i>RAB11FIP5</i> | Caudate | 3.51E-10   | 0.000754 | 6.88E-09 | increasing     | 0          |
| <i>RAB18</i>     | Caudate | 8.82E-10   | -0.00071 | 2.39E-07 | decreasing     | 0          |
| <i>RAB26</i>     | Caudate | 5.21E-09   | 0.000605 | 8.97E-06 | increasing     | 0          |
| <i>RAB27B</i>    | Caudate | 4.65E-08   | -0.00079 | 1.35E-09 | decreasing     | 0          |
| <i>RAB35</i>     | Caudate | 4.05E-09   | 0.000152 | 0.313355 | other          | 0          |
| <i>RAB3C</i>     | Caudate | 4.09E-11   | -0.00078 | 2.82E-09 | decreasing     | 0          |
| <i>RAB40C</i>    | Caudate | 8.68E-14   | 0.000246 | 0.102007 | other          | 0          |
| <i>RAB43</i>     | Caudate | 2.41E-09   | 0.000711 | 2.03E-07 | increasing     | 0          |
| <i>RAB5A</i>     | Caudate | 1.99E-06   | -0.00074 | 3.21E-08 | decreasing     | 0          |
| <i>RAB5C</i>     | Caudate | 1.42E-07   | 0.000124 | 0.418782 | other          | 0          |
| <i>RAB6A</i>     | Caudate | 1.38E-10   | -0.00032 | 0.026521 | other          | 0          |
| <i>RABAC1</i>    | Caudate | 3.50E-08   | 0.000378 | 0.011323 | other          | 0          |
| <i>RABEP2</i>    | Caudate | 3.39E-09   | 0.00039  | 0.008605 | other          | 0          |
| <i>RABGGTA</i>   | Caudate | 2.03E-11   | 0.000756 | 9.35E-09 | increasing     | 0          |
| <i>RABL6</i>     | Caudate | 1.16E-09   | 0.000715 | 9.03E-08 | increasing     | 0          |
| <i>RAD17</i>     | Caudate | 1.24E-08   | -0.00062 | 1.17E-05 | decreasing     | 1          |
| <i>RAD21</i>     | Caudate | 1.90E-07   | -0.00038 | 0.008302 | other          | 0          |
| <i>RAD23B</i>    | Caudate | 3.16E-11   | -0.00062 | 1.20E-05 | decreasing     | 0          |
| <i>RAD51D</i>    | Caudate | 5.04E-08   | 0.000641 | 4.82E-06 | increasing     | 0          |
| <i>RAD54L2</i>   | Caudate | 8.37E-08   | 0.00062  | 1.03E-05 | increasing     | 0          |
| <i>RALA</i>      | Caudate | 4.94E-11   | -0.00076 | 1.15E-08 | decreasing     | 0          |
| <i>RALGDS</i>    | Caudate | 1.58E-07   | 0.000707 | 2.22E-07 | increasing     | 0          |
| <i>RALGPS2</i>   | Caudate | 4.88E-11   | -0.0008  | 5.88E-10 | decreasing     | 0          |
| <i>RANGAP1</i>   | Caudate | 3.80E-10   | 0.00066  | 1.11E-06 | increasing     | 0          |
| <i>RAP1A</i>     | Caudate | 2.12E-10   | -0.00069 | 3.85E-07 | decreasing     | 0          |

**Supplementary Table 9. Genes with a significant age effect from either ANOVA or linear regression. Beta is the regression coefficient, Pval is the p-value for the regression coefficient of expression on age (in days). Effect category is increasing if beta is positive and significant, decreasing if beta is negative and significant, and other if the ANOVA were significant rather than the linear regression. Local eQTL is 1 if the gene had a significant local eQTL**

| Gene           | Tissue  | Anova.pval | Beta     | Pval     | EffectCategory | Local eQTL |
|----------------|---------|------------|----------|----------|----------------|------------|
| <i>RAP2C</i>   | Caudate | 5.56E-14   | -0.00045 | 0.00144  | other          | 0          |
| <i>RAPGEF5</i> | Caudate | 5.21E-10   | 0.000689 | 2.70E-07 | increasing     | 0          |
| <i>RARRES2</i> | Caudate | 1.18E-12   | 0.000734 | 1.87E-08 | increasing     | 0          |
| <i>RASA2</i>   | Caudate | 6.31E-09   | -0.00065 | 3.42E-06 | decreasing     | 0          |
| <i>RASA3</i>   | Caudate | 4.05E-09   | 0.000227 | 0.125579 | other          | 0          |
| <i>RASD1</i>   | Caudate | 5.00E-09   | 0.000809 | 1.59E-10 | increasing     | 0          |
| <i>RASEF</i>   | Caudate | 9.62E-10   | 0.000727 | 8.19E-08 | increasing     | 1          |
| <i>RASGRF1</i> | Caudate | 2.00E-10   | -0.00068 | 7.47E-07 | decreasing     | 0          |
| <i>RASGRF2</i> | Caudate | 7.22E-17   | 0.000851 | 5.91E-12 | increasing     | 0          |
| <i>RASGRP2</i> | Caudate | 2.59E-07   | 0.000162 | 0.286995 | other          | 0          |
| <i>RASSF10</i> | Caudate | 2.81E-09   | -0.00058 | 1.64E-05 | decreasing     | 0          |
| <i>RASSF2</i>  | Caudate | 1.89E-09   | 0.000779 | 1.84E-09 | increasing     | 0          |
| <i>RASSF4</i>  | Caudate | 1.78E-08   | 0.000195 | 0.186097 | other          | 0          |
| <i>RB1</i>     | Caudate | 2.81E-09   | -0.00071 | 2.36E-07 | decreasing     | 0          |
| <i>RB1CC1</i>  | Caudate | 1.80E-09   | -0.00062 | 8.80E-06 | decreasing     | 0          |
| <i>RBBP8</i>   | Caudate | 1.89E-07   | -0.00036 | 0.0139   | other          | 0          |
| <i>RBCK1</i>   | Caudate | 7.11E-09   | 0.000743 | 3.22E-08 | increasing     | 0          |
| <i>RBFOX3</i>  | Caudate | 1.74E-07   | 0.000686 | 3.95E-07 | increasing     | 0          |
| <i>RBM15</i>   | Caudate | 8.79E-08   | -0.00018 | 0.234717 | other          | 0          |
| <i>RBM15B</i>  | Caudate | 1.53E-09   | 0.000123 | 0.4179   | other          | 0          |
| <i>RBM18</i>   | Caudate | 1.00E-05   | -0.00073 | 7.49E-08 | decreasing     | 0          |
| <i>RBM20</i>   | Caudate | 7.82E-08   | 0.000762 | 1.15E-08 | increasing     | 0          |
| <i>RBM24</i>   | Caudate | 1.41E-07   | -0.00068 | 7.46E-07 | decreasing     | 0          |
| <i>RBM25</i>   | Caudate | 1.22E-08   | -0.00056 | 8.64E-05 | decreasing     | 0          |
| <i>RBM26</i>   | Caudate | 3.97E-14   | -0.00061 | 1.46E-05 | decreasing     | 0          |
| <i>RBM27</i>   | Caudate | 1.16E-06   | -0.00071 | 1.93E-07 | decreasing     | 0          |
| <i>RBM41</i>   | Caudate | 1.27E-07   | -0.00075 | 2.10E-08 | decreasing     | 0          |
| <i>RBM42</i>   | Caudate | 1.77E-08   | 0.0004   | 0.007084 | other          | 0          |
| <i>RBM7</i>    | Caudate | 1.68E-07   | -0.00064 | 4.39E-06 | decreasing     | 0          |
| <i>RBMS1</i>   | Caudate | 1.55E-07   | -0.00073 | 5.52E-08 | decreasing     | 0          |
| <i>RBMS3</i>   | Caudate | 7.77E-06   | -0.00071 | 1.21E-07 | decreasing     | 0          |
| <i>RBP3</i>    | Caudate | 7.97E-15   | 0.000801 | 1.42E-10 | increasing     | 0          |
| <i>RC3H2</i>   | Caudate | 9.52E-09   | -0.00066 | 1.48E-06 | decreasing     | 0          |
| <i>RCAN2</i>   | Caudate | 1.74E-10   | 0.000415 | 0.003703 | other          | 0          |
| <i>RCBTB2</i>  | Caudate | 6.08E-05   | -0.0007  | 2.19E-07 | decreasing     | 0          |
| <i>RCCD1</i>   | Caudate | 1.92E-08   | 0.000677 | 1.02E-06 | increasing     | 0          |
| <i>RCOR2</i>   | Caudate | 1.43E-08   | 0.00076  | 1.31E-08 | increasing     | 0          |
| <i>RDH13</i>   | Caudate | 2.58E-09   | 9.23E-05 | 0.543192 | other          | 1          |
| <i>RECQL5</i>  | Caudate | 2.50E-07   | 0.000609 | 1.72E-05 | increasing     | 0          |
| <i>REEP5</i>   | Caudate | 9.82E-06   | -0.00071 | 1.80E-07 | decreasing     | 1          |

**Supplementary Table 9. Genes with a significant age effect from either ANOVA or linear regression. Beta is the regression coefficient, Pval is the p-value for the regression coefficient of expression on age (in days). Effect category is increasing if beta is positive and significant, decreasing if beta is negative and significant, and other if the ANOVA were significant rather than the linear regression. Local eQTL is 1 if the gene had a significant local eQTL**

| Gene          | Tissue  | Anova.pval | Beta     | Pval     | EffectCategory | Local eQTL |
|---------------|---------|------------|----------|----------|----------------|------------|
| <i>RELL1</i>  | Caudate | 7.48E-08   | -0.00055 | 0.000128 | other          | 0          |
| <i>RELT</i>   | Caudate | 1.81E-08   | 0.000495 | 0.000513 | other          | 0          |
| <i>REPIN1</i> | Caudate | 4.09E-09   | 0.0005   | 0.000508 | other          | 0          |
| <i>REPS1</i>  | Caudate | 9.48E-08   | 0.000605 | 1.45E-05 | increasing     | 0          |
| <i>REV3L</i>  | Caudate | 1.77E-10   | -0.00054 | 0.000108 | other          | 0          |
| <i>RFFL</i>   | Caudate | 1.63E-09   | 0.000481 | 0.000545 | other          | 0          |
| <i>RFNG</i>   | Caudate | 4.11E-09   | 0.000643 | 4.21E-06 | increasing     | 0          |
| <i>RFPL1</i>  | Caudate | 1.88E-07   | 0.000237 | 0.119142 | other          | 0          |
| <i>RFX3</i>   | Caudate | 5.11E-11   | -0.00072 | 9.68E-08 | decreasing     | 0          |
| <i>RGR</i>    | Caudate | 1.41E-07   | -0.0002  | 0.178259 | other          | 0          |
| <i>RGS11</i>  | Caudate | 2.27E-08   | 0.000737 | 3.34E-08 | increasing     | 0          |
| <i>RGS14</i>  | Caudate | 7.19E-12   | 0.000357 | 0.013616 | other          | 0          |
| <i>RGS17</i>  | Caudate | 1.71E-17   | -0.00088 | 1.94E-13 | decreasing     | 0          |
| <i>RGS19</i>  | Caudate | 1.50E-07   | 0.000617 | 1.21E-05 | increasing     | 0          |
| <i>RGS7BP</i> | Caudate | 1.89E-09   | -0.00064 | 3.21E-06 | decreasing     | 0          |
| <i>RGS9</i>   | Caudate | 1.62E-08   | -0.00063 | 7.68E-06 | decreasing     | 1          |
| <i>RHBDD2</i> | Caudate | 5.94E-08   | 0.000211 | 0.146883 | other          | 0          |
| <i>RHBDD3</i> | Caudate | 1.95E-09   | 0.000381 | 0.008929 | other          | 0          |
| <i>RHBDF1</i> | Caudate | 1.73E-08   | 0.000741 | 3.98E-08 | increasing     | 0          |
| <i>RHBDL1</i> | Caudate | 2.17E-10   | 0.000676 | 9.74E-07 | increasing     | 0          |
| <i>RHOA</i>   | Caudate | 2.88E-10   | -0.00048 | 0.001113 | other          | 0          |
| <i>RHOG</i>   | Caudate | 1.57E-10   | 0.000654 | 1.76E-06 | increasing     | 0          |
| <i>RHOT2</i>  | Caudate | 2.16E-09   | 0.000604 | 2.09E-05 | increasing     | 0          |
| <i>RILP</i>   | Caudate | 1.02E-07   | 0.000691 | 3.97E-07 | increasing     | 0          |
| <i>RILPL1</i> | Caudate | 1.83E-07   | 0.00065  | 1.56E-06 | increasing     | 1          |
| <i>RIMKLA</i> | Caudate | 2.26E-12   | -0.00082 | 3.28E-10 | decreasing     | 0          |
| <i>RIMKLB</i> | Caudate | 7.17E-11   | -0.00074 | 4.72E-09 | decreasing     | 0          |
| <i>RIMS3</i>  | Caudate | 5.54E-06   | 0.000741 | 4.09E-08 | increasing     | 0          |
| <i>RIMS4</i>  | Caudate | 1.65E-10   | 0.000107 | 0.481263 | other          | 0          |
| <i>RIN1</i>   | Caudate | 2.62E-09   | 0.000707 | 1.74E-07 | increasing     | 0          |
| <i>RLTPR</i>  | Caudate | 3.40E-09   | 0.000824 | 1.11E-10 | increasing     | 0          |
| <i>RMND5B</i> | Caudate | 4.26E-09   | 0.000329 | 0.027899 | other          | 0          |
| <i>RNASE6</i> | Caudate | 3.37E-06   | -0.00072 | 1.08E-07 | decreasing     | 0          |
| <i>RND2</i>   | Caudate | 4.57E-08   | 0.000734 | 3.07E-08 | increasing     | 0          |
| <i>RNF112</i> | Caudate | 1.39E-08   | 0.000488 | 0.000581 | other          | 0          |
| <i>RNF125</i> | Caudate | 6.65E-09   | 0.000723 | 2.77E-08 | increasing     | 0          |
| <i>RNF130</i> | Caudate | 1.63E-11   | 0.000689 | 5.74E-07 | increasing     | 0          |
| <i>RNF138</i> | Caudate | 8.07E-11   | -0.00077 | 7.50E-10 | decreasing     | 0          |
| <i>RNF152</i> | Caudate | 4.94E-13   | -0.00076 | 5.12E-09 | decreasing     | 0          |
| <i>RNF165</i> | Caudate | 2.79E-12   | -0.00081 | 1.09E-10 | decreasing     | 0          |

**Supplementary Table 9. Genes with a significant age effect from either ANOVA or linear regression. Beta is the regression coefficient, Pval is the p-value for the regression coefficient of expression on age (in days). Effect category is increasing if beta is positive and significant, decreasing if beta is negative and significant, and other if the ANOVA were significant rather than the linear regression. Local eQTL is 1 if the gene had a significant local eQTL**

| Gene            | Tissue  | Anova.pval | Beta     | Pval     | EffectCategory | Local eQTL |
|-----------------|---------|------------|----------|----------|----------------|------------|
| <i>RNF2</i>     | Caudate | 5.01E-07   | -0.00073 | 3.76E-08 | decreasing     | 0          |
| <i>RNF215</i>   | Caudate | 3.67E-08   | 0.000403 | 0.006395 | other          | 0          |
| <i>RNF26</i>    | Caudate | 1.78E-07   | 0.000439 | 0.001766 | other          | 0          |
| <i>RNF31</i>    | Caudate | 8.09E-09   | 0.000388 | 0.008868 | other          | 0          |
| <i>RNF6</i>     | Caudate | 3.36E-10   | -0.00049 | 0.000611 | other          | 0          |
| <i>RNH1</i>     | Caudate | 1.22E-07   | 0.000592 | 3.20E-05 | increasing     | 0          |
| <i>RNPC3</i>    | Caudate | 3.85E-10   | -0.00022 | 0.14825  | other          | 0          |
| <i>RNPS1</i>    | Caudate | 2.05E-08   | 0.00012  | 0.43467  | other          | 0          |
| <i>ROBO1</i>    | Caudate | 1.01E-13   | -0.00076 | 3.14E-09 | decreasing     | 0          |
| <i>ROBO2</i>    | Caudate | 3.23E-18   | -0.00088 | 4.59E-13 | decreasing     | 0          |
| <i>ROCK1</i>    | Caudate | 1.60E-09   | -0.00036 | 0.01432  | other          | 0          |
| <i>ROCK2</i>    | Caudate | 7.54E-09   | -0.00043 | 0.002754 | other          | 0          |
| <i>ROGDI</i>    | Caudate | 1.81E-11   | 0.000668 | 5.32E-07 | increasing     | 0          |
| <i>RORA</i>     | Caudate | 2.54E-09   | -0.00076 | 1.10E-08 | decreasing     | 0          |
| <i>RP2</i>      | Caudate | 3.38E-09   | -0.0007  | 2.97E-07 | decreasing     | 0          |
| <i>RPAP3</i>    | Caudate | 1.95E-07   | -0.00073 | 3.56E-08 | decreasing     | 0          |
| <i>RPGRIP1L</i> | Caudate | 1.58E-07   | -0.0007  | 3.75E-07 | decreasing     | 0          |
| <i>RPL13A</i>   | Caudate | 1.31E-07   | 0.000247 | 0.09774  | other          | 0          |
| <i>RPL36</i>    | Caudate | 9.05E-11   | 0.000107 | 0.482017 | other          | 0          |
| <i>RPP25</i>    | Caudate | 2.34E-13   | 0.00028  | 0.058144 | other          | 0          |
| <i>RPS15</i>    | Caudate | 4.24E-08   | 0.000369 | 0.013202 | other          | 0          |
| <i>RPS19</i>    | Caudate | 2.70E-08   | 0.000341 | 0.022315 | other          | 0          |
| <i>RPS6KA1</i>  | Caudate | 4.80E-12   | 0.000748 | 1.01E-08 | increasing     | 0          |
| <i>RPS6KA2</i>  | Caudate | 3.25E-09   | 0.000528 | 0.000261 | other          | 0          |
| <i>RPS6KA4</i>  | Caudate | 1.34E-14   | 0.000702 | 9.15E-08 | increasing     | 0          |
| <i>RPS6KB2</i>  | Caudate | 8.51E-08   | 0.000183 | 0.229462 | other          | 0          |
| <i>RPUSD1</i>   | Caudate | 4.39E-08   | 0.000483 | 0.000871 | other          | 0          |
| <i>RRAS2</i>    | Caudate | 7.04E-18   | -0.00088 | 4.27E-13 | decreasing     | 0          |
| <i>RRBP1</i>    | Caudate | 4.14E-08   | 0.0003   | 0.0458   | other          | 0          |
| <i>RRP1</i>     | Caudate | 1.06E-08   | 0.000683 | 7.73E-07 | increasing     | 0          |
| <i>RRP8</i>     | Caudate | 9.38E-10   | 0.000793 | 1.22E-09 | increasing     | 0          |
| <i>RSAD1</i>    | Caudate | 5.55E-17   | 0.000879 | 9.82E-13 | increasing     | 0          |
| <i>RSBN1</i>    | Caudate | 2.20E-08   | -0.00071 | 1.37E-07 | decreasing     | 0          |
| <i>RTEL1</i>    | Caudate | 1.14E-09   | 0.000563 | 7.62E-05 | increasing     | 0          |
| <i>RTKN</i>     | Caudate | 1.18E-12   | 0.000815 | 2.58E-10 | increasing     | 0          |
| <i>RTKN2</i>    | Caudate | 2.63E-09   | -0.00073 | 3.29E-08 | decreasing     | 0          |
| <i>RTN3</i>     | Caudate | 2.19E-08   | -0.00044 | 0.002315 | other          | 0          |
| <i>RUNDC3A</i>  | Caudate | 6.17E-09   | 0.000493 | 0.000508 | other          | 0          |
| <i>RUNDC3B</i>  | Caudate | 1.07E-09   | -0.00064 | 3.38E-06 | decreasing     | 0          |
| <i>RWDD4</i>    | Caudate | 5.88E-06   | -0.00071 | 1.56E-07 | decreasing     | 0          |

**Supplementary Table 9. Genes with a significant age effect from either ANOVA or linear regression. Beta is the regression coefficient, Pval is the p-value for the regression coefficient of expression on age (in days). Effect category is increasing if beta is positive and significant, decreasing if beta is negative and significant, and other if the ANOVA were significant rather than the linear regression. Local eQTL is 1 if the gene had a significant local eQTL**

| Gene           | Tissue  | Anova.pval | Beta     | Pval     | EffectCategory | Local eQTL |
|----------------|---------|------------|----------|----------|----------------|------------|
| <i>RXRA</i>    | Caudate | 3.22E-08   | 0.000607 | 1.37E-05 | increasing     | 0          |
| <i>RXRG</i>    | Caudate | 1.63E-11   | -0.00075 | 1.15E-08 | decreasing     | 0          |
| <i>RYBP</i>    | Caudate | 1.22E-14   | -0.00088 | 5.44E-13 | decreasing     | 0          |
| <i>RYR1</i>    | Caudate | 1.27E-16   | 0.000834 | 4.06E-11 | increasing     | 0          |
| <i>S100A1</i>  | Caudate | 7.88E-09   | 0.000118 | 0.420861 | other          | 0          |
| <i>S1PR3</i>   | Caudate | 1.20E-07   | -0.00048 | 0.000807 | other          | 1          |
| <i>S1PR5</i>   | Caudate | 1.56E-20   | 0.000869 | 5.61E-13 | increasing     | 0          |
| <i>SAC3D1</i>  | Caudate | 2.19E-09   | 0.000419 | 0.002979 | other          | 0          |
| <i>SAFB2</i>   | Caudate | 3.93E-08   | 0.0005   | 0.000554 | other          | 0          |
| <i>SAP25</i>   | Caudate | 1.06E-09   | 0.000828 | 5.02E-11 | increasing     | 0          |
| <i>SART1</i>   | Caudate | 7.57E-11   | 0.000535 | 0.000207 | other          | 0          |
| <i>SAV1</i>    | Caudate | 2.43E-07   | -0.00073 | 8.98E-08 | decreasing     | 0          |
| <i>SBF1</i>    | Caudate | 5.03E-11   | 0.000535 | 0.000211 | other          | 0          |
| <i>SBNO1</i>   | Caudate | 1.08E-09   | -0.00052 | 0.000309 | other          | 0          |
| <i>SC5D</i>    | Caudate | 3.42E-12   | -0.00074 | 4.34E-08 | decreasing     | 0          |
| <i>SCAF1</i>   | Caudate | 9.60E-09   | 0.000744 | 2.56E-08 | increasing     | 0          |
| <i>SCAI</i>    | Caudate | 5.48E-07   | -0.00075 | 1.99E-08 | decreasing     | 0          |
| <i>SCAND1</i>  | Caudate | 1.84E-09   | 0.000316 | 0.035732 | other          | 0          |
| <i>SCAP</i>    | Caudate | 2.59E-11   | 8.10E-05 | 0.587587 | other          | 0          |
| <i>SCARB1</i>  | Caudate | 5.10E-08   | 0.00064  | 1.37E-06 | increasing     | 0          |
| <i>SCARF1</i>  | Caudate | 2.20E-09   | 0.000698 | 3.68E-07 | increasing     | 0          |
| <i>SCARF2</i>  | Caudate | 7.55E-12   | 0.000655 | 2.38E-06 | increasing     | 0          |
| <i>SCD</i>     | Caudate | 1.52E-09   | 0.000605 | 9.06E-06 | increasing     | 0          |
| <i>SCFD1</i>   | Caudate | 4.54E-06   | -0.00073 | 5.59E-08 | decreasing     | 0          |
| <i>SCG3</i>    | Caudate | 4.70E-09   | -0.00037 | 0.009566 | other          | 0          |
| <i>SCGB1C1</i> | Caudate | 1.09E-08   | 0.000782 | 1.67E-09 | increasing     | 0          |
| <i>SCGB3A1</i> | Caudate | 3.05E-07   | 0.000758 | 2.05E-09 | increasing     | 0          |
| <i>SCN1B</i>   | Caudate | 3.56E-20   | 0.000838 | 6.19E-12 | increasing     | 0          |
| <i>SCN3A</i>   | Caudate | 3.86E-10   | -0.00079 | 6.82E-10 | decreasing     | 0          |
| <i>SCN4B</i>   | Caudate | 2.42E-07   | 0.000282 | 0.053929 | other          | 1          |
| <i>SCP2</i>    | Caudate | 2.64E-08   | -0.00069 | 6.19E-07 | decreasing     | 0          |
| <i>SCRIB</i>   | Caudate | 1.61E-12   | 0.000728 | 6.51E-08 | increasing     | 0          |
| <i>SCRN3</i>   | Caudate | 1.87E-07   | -0.00073 | 6.10E-08 | decreasing     | 0          |
| <i>SCXB</i>    | Caudate | 1.08E-06   | 0.000712 | 1.47E-07 | increasing     | 0          |
| <i>SCYL2</i>   | Caudate | 1.05E-10   | -0.00078 | 2.41E-09 | decreasing     | 0          |
| <i>SDCBP2</i>  | Caudate | 4.17E-08   | 0.000702 | 3.01E-07 | increasing     | 0          |
| <i>SDF2L1</i>  | Caudate | 1.45E-08   | 0.000678 | 6.24E-07 | increasing     | 0          |
| <i>SDHC</i>    | Caudate | 3.21E-09   | -0.00039 | 0.007885 | other          | 1          |
| <i>SDK2</i>    | Caudate | 1.62E-07   | 0.000197 | 0.188669 | other          | 0          |
| <i>SEC14L1</i> | Caudate | 5.61E-08   | 0.000725 | 2.45E-08 | increasing     | 0          |

**Supplementary Table 9. Genes with a significant age effect from either ANOVA or linear regression. Beta is the regression coefficient, Pval is the p-value for the regression coefficient of expression on age (in days). Effect category is increasing if beta is positive and significant, decreasing if beta is negative and significant, and other if the ANOVA were significant rather than the linear regression. Local eQTL is 1 if the gene had a significant local eQTL**

| Gene            | Tissue  | Anova.pval | Beta     | Pval     | EffectCategory | Local eQTL |
|-----------------|---------|------------|----------|----------|----------------|------------|
| <i>SEC14L5</i>  | Caudate | 2.27E-09   | 0.000764 | 2.10E-09 | increasing     | 0          |
| <i>SEC24C</i>   | Caudate | 1.33E-07   | 0.0004   | 0.006934 | other          | 0          |
| <i>SEC31B</i>   | Caudate | 5.14E-08   | 0.000791 | 1.40E-09 | increasing     | 0          |
| <i>SEC61A1</i>  | Caudate | 1.64E-12   | -0.0002  | 0.181692 | other          | 0          |
| <i>SEC62</i>    | Caudate | 7.04E-08   | -0.00047 | 0.001131 | other          | 0          |
| <i>SEMA3F</i>   | Caudate | 1.31E-10   | 8.08E-05 | 0.586304 | other          | 0          |
| <i>SEMA4C</i>   | Caudate | 2.33E-07   | 0.000607 | 1.81E-05 | increasing     | 0          |
| <i>SEMA4F</i>   | Caudate | 2.63E-08   | 0.000617 | 9.04E-06 | increasing     | 0          |
| <i>SEMA5B</i>   | Caudate | 9.63E-08   | -0.00052 | 0.000192 | other          | 0          |
| <i>SEMA6B</i>   | Caudate | 8.19E-08   | 0.000404 | 0.00603  | other          | 0          |
| <i>SENP7</i>    | Caudate | 3.96E-09   | -0.00079 | 3.45E-10 | decreasing     | 0          |
| <i>SEPHS1</i>   | Caudate | 6.30E-08   | -0.0005  | 0.000275 | other          | 0          |
| <i>SEPP1</i>    | Caudate | 4.65E-09   | 0.000622 | 6.64E-06 | increasing     | 0          |
| <i>SEPT4</i>    | Caudate | 3.69E-21   | 0.000869 | 3.14E-13 | increasing     | 0          |
| <i>SEPT8</i>    | Caudate | 1.42E-14   | 0.000779 | 1.61E-09 | increasing     | 0          |
| <i>SERBP1</i>   | Caudate | 6.03E-11   | -0.00078 | 1.14E-09 | decreasing     | 0          |
| <i>SERHL2</i>   | Caudate | 1.10E-07   | 0.000174 | 0.242972 | other          | 0          |
| <i>SERINC3</i>  | Caudate | 5.34E-08   | -0.00048 | 0.00099  | other          | 0          |
| <i>SERPIND1</i> | Caudate | 2.32E-09   | 0.000788 | 6.97E-10 | increasing     | 0          |
| <i>SERPINE2</i> | Caudate | 1.37E-11   | -0.00087 | 5.58E-12 | decreasing     | 0          |
| <i>SERPING1</i> | Caudate | 8.26E-08   | 0.000525 | 0.000192 | other          | 0          |
| <i>SF3A2</i>    | Caudate | 1.28E-07   | 0.000526 | 0.000267 | other          | 0          |
| <i>SFMBT1</i>   | Caudate | 1.12E-10   | -0.00078 | 2.81E-10 | decreasing     | 0          |
| <i>SFT2D3</i>   | Caudate | 1.02E-07   | 9.71E-05 | 0.515638 | other          | 0          |
| <i>SFXN3</i>    | Caudate | 2.29E-07   | 0.000593 | 2.92E-05 | increasing     | 1          |
| <i>SFXN4</i>    | Caudate | 1.55E-09   | 0.000666 | 1.47E-06 | increasing     | 0          |
| <i>SGCB</i>     | Caudate | 3.03E-09   | -0.00076 | 8.19E-09 | decreasing     | 0          |
| <i>SGCD</i>     | Caudate | 5.33E-16   | -0.00081 | 2.13E-10 | decreasing     | 0          |
| <i>SGCZ</i>     | Caudate | 5.92E-08   | -0.00066 | 2.61E-06 | decreasing     | 0          |
| <i>SGOL2</i>    | Caudate | 4.19E-08   | -0.00061 | 1.17E-05 | decreasing     | 0          |
| <i>SGPL1</i>    | Caudate | 3.12E-08   | -0.00031 | 0.035173 | other          | 0          |
| <i>SGSM1</i>    | Caudate | 8.65E-11   | 0.00083  | 1.03E-10 | increasing     | 0          |
| <i>SGSM2</i>    | Caudate | 4.64E-09   | 0.000633 | 5.83E-06 | increasing     | 0          |
| <i>SGTB</i>     | Caudate | 1.83E-07   | -0.00027 | 0.073581 | other          | 0          |
| <i>SH2B2</i>    | Caudate | 2.76E-08   | 4.47E-05 | 0.76479  | other          | 0          |
| <i>SH2D5</i>    | Caudate | 5.21E-16   | 0.000762 | 2.33E-09 | increasing     | 0          |
| <i>SH3BGRL3</i> | Caudate | 1.37E-07   | -0.00029 | 0.052025 | other          | 0          |
| <i>SH3BP2</i>   | Caudate | 1.58E-08   | 0.000171 | 0.250352 | other          | 0          |
| <i>SH3GLB2</i>  | Caudate | 1.96E-07   | 0.000532 | 0.000238 | other          | 0          |
| <i>SH3TC1</i>   | Caudate | 2.03E-08   | 0.000341 | 0.022091 | other          | 0          |

**Supplementary Table 9. Genes with a significant age effect from either ANOVA or linear regression. Beta is the regression coefficient, Pval is the p-value for the regression coefficient of expression on age (in days). Effect category is increasing if beta is positive and significant, decreasing if beta is negative and significant, and other if the ANOVA were significant rather than the linear regression. Local eQTL is 1 if the gene had a significant local eQTL**

| Gene            | Tissue  | Anova.pval | Beta      | Pval     | EffectCategory | Local eQTL |
|-----------------|---------|------------|-----------|----------|----------------|------------|
| <i>SH3TC2</i>   | Caudate | 4.97E-10   | 0.000793  | 3.91E-10 | increasing     | 0          |
| <i>SHARPIN</i>  | Caudate | 8.15E-09   | 0.000741  | 3.57E-08 | increasing     | 1          |
| <i>SHF</i>      | Caudate | 4.85E-09   | 0.000171  | 0.255302 | other          | 0          |
| <i>SHH</i>      | Caudate | 2.35E-07   | 0.000406  | 0.006194 | other          | 0          |
| <i>SHPRH</i>    | Caudate | 3.57E-13   | -0.00083  | 1.38E-11 | decreasing     | 0          |
| <i>SHROOM1</i>  | Caudate | 2.62E-08   | 0.000792  | 9.65E-10 | increasing     | 0          |
| <i>SHROOM2</i>  | Caudate | 2.50E-07   | -9.21E-06 | 0.950605 | other          | 0          |
| <i>SIGIRR</i>   | Caudate | 1.34E-09   | 0.000798  | 1.15E-09 | increasing     | 1          |
| <i>SIGLEC1</i>  | Caudate | 2.11E-06   | 0.000711  | 8.53E-08 | increasing     | 0          |
| <i>SIPA1L2</i>  | Caudate | 2.52E-15   | -0.00082  | 6.52E-11 | decreasing     | 0          |
| <i>SIRT2</i>    | Caudate | 1.09E-08   | -2.43E-05 | 0.872054 | other          | 0          |
| <i>SIRT3</i>    | Caudate | 3.17E-09   | 0.000647  | 2.93E-06 | increasing     | 0          |
| <i>SIRT7</i>    | Caudate | 9.39E-08   | 0.000488  | 0.000859 | other          | 0          |
| <i>SKAP1</i>    | Caudate | 7.13E-15   | -0.00085  | 8.87E-12 | decreasing     | 0          |
| <i>SKIL</i>     | Caudate | 3.28E-13   | -0.00086  | 6.06E-12 | decreasing     | 0          |
| <i>SLA</i>      | Caudate | 2.60E-09   | -0.00066  | 7.93E-07 | decreasing     | 0          |
| <i>SLAIN1</i>   | Caudate | 4.02E-08   | 0.000608  | 1.18E-05 | increasing     | 0          |
| <i>SLAIN2</i>   | Caudate | 3.38E-12   | -0.00061  | 1.42E-05 | decreasing     | 0          |
| <i>SLC10A3</i>  | Caudate | 2.06E-08   | 0.000578  | 3.97E-05 | increasing     | 0          |
| <i>SLC12A2</i>  | Caudate | 3.35E-09   | 0.000386  | 0.007776 | other          | 0          |
| <i>SLC12A3</i>  | Caudate | 4.42E-09   | 0.00053   | 0.000164 | other          | 0          |
| <i>SLC12A5</i>  | Caudate | 5.94E-10   | 0.000462  | 0.001691 | other          | 0          |
| <i>SLC12A8</i>  | Caudate | 2.38E-08   | -0.00025  | 0.089704 | other          | 0          |
| <i>SLC12A9</i>  | Caudate | 1.32E-08   | 0.000374  | 0.011695 | other          | 0          |
| <i>SLC16A1</i>  | Caudate | 1.40E-13   | -0.00082  | 6.01E-11 | decreasing     | 0          |
| <i>SLC16A11</i> | Caudate | 7.30E-17   | 0.000863  | 1.95E-12 | increasing     | 0          |
| <i>SLC16A14</i> | Caudate | 3.22E-10   | -0.00075  | 1.04E-08 | decreasing     | 0          |
| <i>SLC16A4</i>  | Caudate | 8.48E-08   | -0.00063  | 3.56E-06 | decreasing     | 0          |
| <i>SLC16A7</i>  | Caudate | 2.02E-10   | -0.00079  | 1.66E-09 | decreasing     | 0          |
| <i>SLC17A2</i>  | Caudate | 1.10E-13   | 0.000822  | 1.01E-11 | increasing     | 0          |
| <i>SLC17A3</i>  | Caudate | 1.33E-11   | 0.000796  | 3.63E-10 | increasing     | 0          |
| <i>SLC17A5</i>  | Caudate | 8.00E-08   | 0.000569  | 5.37E-05 | increasing     | 0          |
| <i>SLC18A2</i>  | Caudate | 1.07E-07   | -0.00075  | 1.45E-08 | decreasing     | 0          |
| <i>SLC1A6</i>   | Caudate | 2.76E-09   | -0.0001   | 0.50221  | other          | 0          |
| <i>SLC20A2</i>  | Caudate | 3.24E-14   | 0.000814  | 4.74E-11 | increasing     | 0          |
| <i>SLC22A17</i> | Caudate | 1.47E-09   | 0.000751  | 2.05E-08 | increasing     | 0          |
| <i>SLC24A3</i>  | Caudate | 2.48E-07   | -0.00061  | 1.21E-05 | decreasing     | 0          |
| <i>SLC24A5</i>  | Caudate | 1.48E-08   | -0.00077  | 7.47E-09 | decreasing     | 0          |
| <i>SLC25A1</i>  | Caudate | 4.29E-08   | 0.000577  | 5.40E-05 | increasing     | 0          |
| <i>SLC25A10</i> | Caudate | 1.60E-10   | 0.000493  | 0.000707 | other          | 0          |



**Supplementary Table 9. Genes with a significant age effect from either ANOVA or linear regression. Beta is the regression coefficient, Pval is the p-value for the regression coefficient of expression on age (in days). Effect category is increasing if beta is positive and significant, decreasing if beta is negative and significant, and other if the ANOVA were significant rather than the linear regression. Local eQTL is 1 if the gene had a significant local eQTL**

| Gene            | Tissue  | Anova.pval | Beta     | Pval     | EffectCategory | Local eQTL |
|-----------------|---------|------------|----------|----------|----------------|------------|
| <i>SLC25A13</i> | Caudate | 6.55E-08   | 0.000734 | 3.35E-08 | increasing     | 0          |
| <i>SLC25A28</i> | Caudate | 6.03E-08   | 0.000761 | 3.65E-09 | increasing     | 0          |
| <i>SLC25A34</i> | Caudate | 1.95E-07   | 0.000652 | 3.05E-06 | increasing     | 0          |
| <i>SLC25A39</i> | Caudate | 3.76E-10   | 0.000277 | 0.060228 | other          | 0          |
| <i>SLC25A40</i> | Caudate | 7.34E-12   | -0.00043 | 0.003443 | other          | 0          |
| <i>SLC25A42</i> | Caudate | 5.60E-08   | 0.000743 | 3.61E-08 | increasing     | 0          |
| <i>SLC25A45</i> | Caudate | 2.02E-12   | 0.000784 | 5.16E-10 | increasing     | 0          |
| <i>SLC26A1</i>  | Caudate | 3.99E-09   | 0.000735 | 5.57E-08 | increasing     | 0          |
| <i>SLC26A11</i> | Caudate | 1.13E-11   | 0.000819 | 2.78E-10 | increasing     | 0          |
| <i>SLC26A5</i>  | Caudate | 2.72E-13   | 0.000847 | 9.92E-13 | increasing     | 0          |
| <i>SLC26A6</i>  | Caudate | 2.19E-07   | 0.000403 | 0.005897 | other          | 0          |
| <i>SLC27A1</i>  | Caudate | 1.92E-07   | 0.000603 | 1.96E-05 | increasing     | 0          |
| <i>SLC27A4</i>  | Caudate | 4.44E-09   | 0.00061  | 1.15E-05 | increasing     | 0          |
| <i>SLC29A2</i>  | Caudate | 3.75E-11   | 0.000415 | 0.004863 | other          | 0          |
| <i>SLC29A4</i>  | Caudate | 5.08E-08   | 0.000466 | 0.000863 | other          | 0          |
| <i>SLC2A12</i>  | Caudate | 1.91E-07   | 0.000532 | 0.000135 | other          | 0          |
| <i>SLC2A6</i>   | Caudate | 2.05E-11   | 0.000461 | 0.001657 | other          | 0          |
| <i>SLC2A8</i>   | Caudate | 5.61E-12   | 0.000474 | 0.000803 | other          | 0          |
| <i>SLC30A10</i> | Caudate | 1.81E-08   | -0.00073 | 1.92E-08 | decreasing     | 0          |
| <i>SLC30A4</i>  | Caudate | 2.91E-08   | -0.00061 | 1.45E-05 | decreasing     | 0          |
| <i>SLC30A6</i>  | Caudate | 1.90E-07   | -0.00073 | 5.74E-08 | decreasing     | 0          |
| <i>SLC30A7</i>  | Caudate | 2.95E-05   | -0.00071 | 2.23E-07 | decreasing     | 0          |
| <i>SLC35A1</i>  | Caudate | 2.06E-06   | -0.00071 | 1.32E-07 | decreasing     | 0          |
| <i>SLC35B2</i>  | Caudate | 2.61E-09   | 0.00033  | 0.02788  | other          | 0          |
| <i>SLC35B3</i>  | Caudate | 1.96E-10   | -0.00084 | 3.39E-11 | decreasing     | 0          |
| <i>SLC35C2</i>  | Caudate | 6.51E-10   | 0.00016  | 0.288595 | other          | 0          |
| <i>SLC35D2</i>  | Caudate | 4.69E-06   | 0.000711 | 1.65E-07 | increasing     | 0          |
| <i>SLC35E1</i>  | Caudate | 1.75E-13   | 0.000465 | 0.001548 | other          | 0          |
| <i>SLC35F1</i>  | Caudate | 8.63E-16   | -0.00086 | 3.20E-12 | decreasing     | 1          |
| <i>SLC35F3</i>  | Caudate | 1.50E-08   | 0.000496 | 0.000351 | other          | 1          |
| <i>SLC36A1</i>  | Caudate | 1.59E-09   | -0.00069 | 3.10E-07 | decreasing     | 0          |
| <i>SLC38A1</i>  | Caudate | 4.70E-10   | -0.00079 | 1.34E-09 | decreasing     | 0          |
| <i>SLC38A10</i> | Caudate | 1.60E-07   | 0.000265 | 0.078611 | other          | 0          |
| <i>SLC39A11</i> | Caudate | 4.45E-06   | 0.000724 | 1.02E-07 | increasing     | 0          |
| <i>SLC39A6</i>  | Caudate | 1.28E-08   | -0.00062 | 1.12E-05 | decreasing     | 0          |
| <i>SLC40A1</i>  | Caudate | 1.05E-10   | -0.00075 | 9.95E-09 | decreasing     | 0          |
| <i>SLC43A2</i>  | Caudate | 9.13E-09   | 9.68E-05 | 0.524475 | other          | 0          |
| <i>SLC44A1</i>  | Caudate | 9.92E-10   | 0.000726 | 2.35E-08 | increasing     | 0          |
| <i>SLC4A11</i>  | Caudate | 2.12E-15   | 0.000879 | 1.14E-12 | increasing     | 0          |
| <i>SLC4A3</i>   | Caudate | 7.15E-10   | 0.000601 | 1.68E-05 | increasing     | 0          |

**Supplementary Table 9. Genes with a significant age effect from either ANOVA or linear regression. Beta is the regression coefficient, Pval is the p-value for the regression coefficient of expression on age (in days). Effect category is increasing if beta is positive and significant, decreasing if beta is negative and significant, and other if the ANOVA were significant rather than the linear regression. Local eQTL is 1 if the gene had a significant local eQTL**

| Gene           | Tissue  | Anova.pval | Beta     | Pval     | EffectCategory | Local eQTL |
|----------------|---------|------------|----------|----------|----------------|------------|
| <i>SLC4A4</i>  | Caudate | 1.73E-07   | -0.00076 | 9.40E-09 | decreasing     | 0          |
| <i>SLC52A2</i> | Caudate | 1.64E-07   | 1.50E-05 | 0.9208   | other          | 0          |
| <i>SLC5A11</i> | Caudate | 3.14E-17   | 0.000848 | 9.29E-13 | increasing     | 0          |
| <i>SLC5A3</i>  | Caudate | 9.89E-09   | 0.000516 | 0.000325 | other          | 0          |
| <i>SLC6A1</i>  | Caudate | 9.83E-13   | 0.000181 | 0.229462 | other          | 0          |
| <i>SLC6A11</i> | Caudate | 1.26E-09   | 0.000113 | 0.451416 | other          | 0          |
| <i>SLC6A6</i>  | Caudate | 1.46E-08   | -0.0002  | 0.198838 | other          | 0          |
| <i>SLC6A8</i>  | Caudate | 4.34E-06   | 0.000721 | 9.35E-08 | increasing     | 0          |
| <i>SLC8A2</i>  | Caudate | 1.23E-08   | 2.82E-05 | 0.852191 | other          | 0          |
| <i>SLC8A3</i>  | Caudate | 4.33E-11   | -0.00073 | 5.22E-08 | decreasing     | 0          |
| <i>SLC9A3</i>  | Caudate | 9.46E-11   | 0.000566 | 7.87E-05 | increasing     | 0          |
| <i>SLC9A5</i>  | Caudate | 1.23E-08   | 0.000721 | 5.73E-08 | increasing     | 0          |
| <i>SLC9A7</i>  | Caudate | 5.76E-16   | 0.000827 | 6.59E-12 | increasing     | 0          |
| <i>SLC9A8</i>  | Caudate | 1.28E-07   | 0.000287 | 0.049113 | other          | 0          |
| <i>SLCO1A2</i> | Caudate | 8.37E-08   | 0.000507 | 0.000374 | other          | 0          |
| <i>SLCO1C1</i> | Caudate | 4.18E-06   | -0.00072 | 9.05E-08 | decreasing     | 0          |
| <i>SLCO5A1</i> | Caudate | 1.67E-08   | 4.62E-05 | 0.759119 | other          | 0          |
| <i>SLITRK4</i> | Caudate | 3.79E-11   | -0.00076 | 1.04E-08 | decreasing     | 0          |
| <i>SMAD3</i>   | Caudate | 2.21E-08   | 4.52E-05 | 0.762465 | other          | 0          |
| <i>SMAD7</i>   | Caudate | 1.27E-07   | -0.00046 | 0.001602 | other          | 0          |
| <i>SMARCA1</i> | Caudate | 9.79E-08   | -0.00076 | 3.13E-09 | decreasing     | 0          |
| <i>SMARCA4</i> | Caudate | 5.76E-10   | 0.00038  | 0.009113 | other          | 0          |
| <i>SMARCA5</i> | Caudate | 1.86E-08   | -0.00024 | 0.111881 | other          | 0          |
| <i>SMARCE1</i> | Caudate | 3.08E-08   | -0.00065 | 2.92E-06 | decreasing     | 0          |
| <i>SMC4</i>    | Caudate | 1.91E-08   | -0.00064 | 6.03E-06 | decreasing     | 0          |
| <i>SMC6</i>    | Caudate | 7.16E-11   | -0.00074 | 2.17E-08 | decreasing     | 0          |
| <i>SMCR8</i>   | Caudate | 8.33E-07   | 0.000715 | 4.31E-08 | increasing     | 0          |
| <i>SMEK2</i>   | Caudate | 1.46E-11   | -0.00082 | 5.32E-11 | decreasing     | 0          |
| <i>SMG5</i>    | Caudate | 1.74E-09   | 0.000451 | 0.002188 | other          | 0          |
| <i>SMG6</i>    | Caudate | 1.39E-08   | 0.000709 | 1.92E-07 | increasing     | 0          |
| <i>SMIM13</i>  | Caudate | 6.10E-06   | -0.00071 | 2.45E-07 | decreasing     | 0          |
| <i>SMIM15</i>  | Caudate | 7.79E-07   | -0.00071 | 2.39E-07 | decreasing     | 0          |
| <i>SMIM17</i>  | Caudate | 7.19E-09   | -0.00079 | 3.62E-10 | decreasing     | 0          |
| <i>SMIM2</i>   | Caudate | 1.24E-09   | 0.000764 | 4.92E-09 | increasing     | 0          |
| <i>SMIM5</i>   | Caudate | 1.05E-09   | 0.000765 | 1.01E-08 | increasing     | 0          |
| <i>SMOC2</i>   | Caudate | 2.15E-07   | -0.00044 | 0.002977 | other          | 0          |
| <i>SMPD3</i>   | Caudate | 2.57E-07   | -0.00041 | 0.005719 | other          | 0          |
| <i>SMPD4</i>   | Caudate | 5.77E-08   | 0.000623 | 9.91E-06 | increasing     | 0          |
| <i>SMPDL3A</i> | Caudate | 7.90E-10   | -0.00073 | 9.82E-09 | decreasing     | 0          |
| <i>SMS</i>     | Caudate | 7.14E-07   | -0.0007  | 1.57E-07 | decreasing     | 0          |

**Supplementary Table 9. Genes with a significant age effect from either ANOVA or linear regression. Beta is the regression coefficient, Pval is the p-value for the regression coefficient of expression on age (in days). Effect category is increasing if beta is positive and significant, decreasing if beta is negative and significant, and other if the ANOVA were significant rather than the linear regression. Local eQTL is 1 if the gene had a significant local eQTL**

| Gene           | Tissue  | Anova.pval | Beta     | Pval     | EffectCategory | Local eQTL |
|----------------|---------|------------|----------|----------|----------------|------------|
| <i>SMYD2</i>   | Caudate | 3.68E-08   | 9.43E-05 | 0.519741 | other          | 0          |
| <i>SNAP25</i>  | Caudate | 3.10E-14   | 9.23E-05 | 0.528526 | other          | 0          |
| <i>SNAP47</i>  | Caudate | 4.91E-08   | 0.000181 | 0.228318 | other          | 0          |
| <i>SNAPC4</i>  | Caudate | 2.16E-08   | 0.000663 | 1.48E-06 | increasing     | 0          |
| <i>SNED1</i>   | Caudate | 6.07E-12   | 0.00081  | 3.13E-10 | increasing     | 0          |
| <i>SNN</i>     | Caudate | 7.37E-10   | 0.00053  | 0.000176 | other          | 0          |
| <i>SNPH</i>    | Caudate | 5.25E-09   | 0.000743 | 8.37E-09 | increasing     | 0          |
| <i>SNRK</i>    | Caudate | 5.23E-07   | -0.00073 | 3.09E-08 | decreasing     | 0          |
| <i>SNRNP70</i> | Caudate | 8.30E-09   | 0.000376 | 0.009908 | other          | 0          |
| <i>SNTA1</i>   | Caudate | 3.63E-10   | 0.000677 | 8.53E-07 | increasing     | 0          |
| <i>SNTG2</i>   | Caudate | 2.98E-07   | 0.00076  | 1.37E-08 | increasing     | 1          |
| <i>SNX10</i>   | Caudate | 9.73E-08   | -0.00076 | 1.43E-08 | decreasing     | 0          |
| <i>SNX13</i>   | Caudate | 6.18E-11   | -0.00081 | 5.05E-10 | decreasing     | 0          |
| <i>SNX14</i>   | Caudate | 6.34E-11   | -0.00059 | 3.28E-05 | decreasing     | 0          |
| <i>SNX2</i>    | Caudate | 4.10E-08   | -0.00066 | 1.92E-06 | decreasing     | 0          |
| <i>SNX21</i>   | Caudate | 9.11E-12   | 0.000773 | 5.79E-09 | increasing     | 0          |
| <i>SNX30</i>   | Caudate | 4.98E-08   | 0.000771 | 6.61E-10 | increasing     | 0          |
| <i>SOCS2</i>   | Caudate | 8.01E-14   | -0.00082 | 6.01E-11 | decreasing     | 0          |
| <i>SOCS4</i>   | Caudate | 9.43E-08   | -0.00074 | 2.11E-08 | decreasing     | 0          |
| <i>SOCS5</i>   | Caudate | 4.85E-08   | -0.00071 | 2.01E-07 | decreasing     | 0          |
| <i>SOGA1</i>   | Caudate | 1.09E-09   | 0.000269 | 0.070719 | other          | 0          |
| <i>SOGA3</i>   | Caudate | 4.51E-13   | 0.000456 | 0.001906 | other          | 0          |
| <i>SORT1</i>   | Caudate | 2.95E-09   | 0.000719 | 3.56E-08 | increasing     | 0          |
| <i>SOS2</i>    | Caudate | 3.24E-09   | -0.00058 | 5.60E-05 | decreasing     | 0          |
| <i>SOWAHA</i>  | Caudate | 5.86E-15   | 0.000765 | 6.12E-09 | increasing     | 0          |
| <i>SOX10</i>   | Caudate | 2.30E-07   | 0.000644 | 4.33E-06 | increasing     | 0          |
| <i>SOX11</i>   | Caudate | 1.54E-13   | -0.00078 | 8.98E-10 | decreasing     | 0          |
| <i>SOX4</i>    | Caudate | 8.80E-16   | -0.00086 | 2.20E-13 | decreasing     | 0          |
| <i>SOX6</i>    | Caudate | 4.44E-11   | -0.00071 | 8.39E-08 | decreasing     | 0          |
| <i>SOX8</i>    | Caudate | 1.04E-08   | 0.000509 | 0.0004   | other          | 0          |
| <i>SP4</i>     | Caudate | 3.73E-08   | -0.00072 | 9.13E-08 | decreasing     | 0          |
| <i>SPAST</i>   | Caudate | 1.76E-08   | -0.00067 | 6.22E-07 | decreasing     | 0          |
| <i>SPATA13</i> | Caudate | 2.79E-10   | 0.000621 | 7.62E-06 | increasing     | 1          |
| <i>SPATA20</i> | Caudate | 6.86E-09   | 0.000466 | 0.001449 | other          | 0          |
| <i>SPATA2L</i> | Caudate | 4.48E-09   | -0.00032 | 0.031834 | other          | 0          |
| <i>SPATA7</i>  | Caudate | 3.64E-08   | -0.00052 | 0.000306 | other          | 0          |
| <i>SPCS2</i>   | Caudate | 7.12E-12   | -0.0002  | 0.175045 | other          | 0          |
| <i>SPCS3</i>   | Caudate | 2.92E-09   | -0.00079 | 1.84E-09 | decreasing     | 0          |
| <i>SPDEF</i>   | Caudate | 5.61E-08   | 0.000588 | 2.66E-05 | increasing     | 0          |
| <i>SPDYC</i>   | Caudate | 3.70E-07   | 0.000729 | 7.54E-08 | increasing     | 0          |

**Supplementary Table 9. Genes with a significant age effect from either ANOVA or linear regression. Beta is the regression coefficient, Pval is the p-value for the regression coefficient of expression on age (in days). Effect category is increasing if beta is positive and significant, decreasing if beta is negative and significant, and other if the ANOVA were significant rather than the linear regression. Local eQTL is 1 if the gene had a significant local eQTL**

| Gene            | Tissue  | Anova.pval | Beta      | Pval     | EffectCategory | Local eQTL |
|-----------------|---------|------------|-----------|----------|----------------|------------|
| <i>SPECC1</i>   | Caudate | 2.07E-07   | 0.000551  | 7.10E-05 | increasing     | 0          |
| <i>SPICE1</i>   | Caudate | 4.15E-08   | -0.00071  | 4.93E-08 | decreasing     | 0          |
| <i>SPIN1</i>    | Caudate | 8.71E-08   | -0.00043  | 0.003458 | other          | 0          |
| <i>SPIN4</i>    | Caudate | 4.08E-09   | -0.00053  | 0.000106 | other          | 0          |
| <i>SPIRE1</i>   | Caudate | 1.38E-07   | 0.000566  | 7.07E-05 | increasing     | 0          |
| <i>SPIRE2</i>   | Caudate | 2.83E-10   | 0.000307  | 0.03306  | other          | 0          |
| <i>SPNS1</i>    | Caudate | 4.22E-11   | 6.13E-05  | 0.682986 | other          | 0          |
| <i>SPNS2</i>    | Caudate | 9.41E-08   | 0.000489  | 0.00083  | other          | 0          |
| <i>SPOCK2</i>   | Caudate | 1.49E-09   | 0.000671  | 4.50E-07 | increasing     | 0          |
| <i>SPON1</i>    | Caudate | 1.60E-09   | -0.00027  | 0.071856 | other          | 0          |
| <i>SPOPL</i>    | Caudate | 1.21E-10   | -0.00023  | 0.125978 | other          | 0          |
| <i>SPP1</i>     | Caudate | 2.18E-12   | 0.000752  | 7.74E-09 | increasing     | 0          |
| <i>SPPL2B</i>   | Caudate | 1.38E-08   | 0.00048   | 0.000938 | other          | 0          |
| <i>SPRY3</i>    | Caudate | 9.32E-11   | -7.98E-05 | 0.59352  | other          | 0          |
| <i>SPRYD3</i>   | Caudate | 3.75E-11   | 0.00071   | 3.54E-08 | increasing     | 0          |
| <i>SPSB1</i>    | Caudate | 2.67E-13   | 0.000843  | 9.34E-12 | increasing     | 0          |
| <i>SPSB3</i>    | Caudate | 6.48E-09   | 0.000433  | 0.002949 | other          | 0          |
| <i>SPTAN1</i>   | Caudate | 5.67E-10   | 0.000408  | 0.00598  | other          | 0          |
| <i>SPTB</i>     | Caudate | 1.31E-12   | 6.66E-05  | 0.657246 | other          | 0          |
| <i>SPTBN2</i>   | Caudate | 5.70E-12   | 0.000591  | 2.35E-05 | increasing     | 0          |
| <i>SPTBN4</i>   | Caudate | 1.60E-11   | 0.000586  | 3.73E-05 | increasing     | 0          |
| <i>SPTSSB</i>   | Caudate | 6.63E-06   | -0.00072  | 1.30E-07 | decreasing     | 0          |
| <i>SQSTM1</i>   | Caudate | 1.07E-09   | 0.000703  | 2.82E-07 | increasing     | 0          |
| <i>SRA1</i>     | Caudate | 4.19E-09   | 0.000168  | 0.269608 | other          | 0          |
| <i>SRCIN1</i>   | Caudate | 6.20E-10   | 0.00063   | 7.68E-06 | increasing     | 0          |
| <i>SREBF1</i>   | Caudate | 7.25E-12   | 0.000836  | 5.30E-11 | increasing     | 0          |
| <i>SREK1</i>    | Caudate | 3.71E-11   | -0.00079  | 6.92E-10 | decreasing     | 0          |
| <i>SREK1IP1</i> | Caudate | 1.38E-09   | -0.00076  | 1.50E-08 | decreasing     | 0          |
| <i>SRP72</i>    | Caudate | 5.10E-08   | -0.0003   | 0.042149 | other          | 0          |
| <i>SRPK3</i>    | Caudate | 1.66E-09   | 0.000784  | 3.15E-09 | increasing     | 0          |
| <i>SRRM3</i>    | Caudate | 2.32E-07   | 0.000636  | 5.11E-06 | increasing     | 0          |
| <i>SRSF10</i>   | Caudate | 1.03E-08   | -0.00065  | 3.27E-06 | decreasing     | 0          |
| <i>SS18L1</i>   | Caudate | 9.84E-12   | 0.0004    | 0.006628 | other          | 0          |
| <i>SSBP2</i>    | Caudate | 3.32E-15   | -0.00083  | 1.63E-11 | decreasing     | 0          |
| <i>SSBP4</i>    | Caudate | 1.43E-09   | 0.000647  | 3.82E-06 | increasing     | 0          |
| <i>SSH3</i>     | Caudate | 2.91E-08   | 0.000661  | 1.96E-06 | increasing     | 0          |
| <i>SSR1</i>     | Caudate | 9.81E-10   | -0.00061  | 1.24E-05 | decreasing     | 0          |
| <i>SSX2IP</i>   | Caudate | 1.84E-08   | -0.00067  | 1.58E-06 | decreasing     | 0          |
| <i>ST18</i>     | Caudate | 4.70E-08   | 0.000733  | 2.06E-08 | increasing     | 0          |
| <i>ST3GAL2</i>  | Caudate | 1.08E-10   | 0.000196  | 0.19994  | other          | 0          |

**Supplementary Table 9. Genes with a significant age effect from either ANOVA or linear regression. Beta is the regression coefficient, Pval is the p-value for the regression coefficient of expression on age (in days). Effect category is increasing if beta is positive and significant, decreasing if beta is negative and significant, and other if the ANOVA were significant rather than the linear regression. Local eQTL is 1 if the gene had a significant local eQTL**

| Gene            | Tissue  | Anova.pval | Beta      | Pval     | EffectCategory | Local eQTL |
|-----------------|---------|------------|-----------|----------|----------------|------------|
| <i>ST8SIA2</i>  | Caudate | 7.89E-12   | -0.00075  | 9.70E-09 | decreasing     | 0          |
| <i>STAB1</i>    | Caudate | 1.91E-07   | -0.00057  | 4.32E-05 | decreasing     | 0          |
| <i>STAM</i>     | Caudate | 2.74E-09   | -0.00041  | 0.005476 | other          | 0          |
| <i>STAM2</i>    | Caudate | 7.52E-08   | -0.00059  | 3.00E-05 | decreasing     | 0          |
| <i>STAMBPL1</i> | Caudate | 5.97E-08   | 0.00048   | 0.00079  | other          | 0          |
| <i>STARD10</i>  | Caudate | 3.80E-13   | 0.000641  | 1.93E-06 | increasing     | 0          |
| <i>STARD3</i>   | Caudate | 5.48E-10   | 0.000751  | 1.74E-08 | increasing     | 0          |
| <i>STAT2</i>    | Caudate | 1.82E-07   | 0.000276  | 0.066385 | other          | 0          |
| <i>STAT3</i>    | Caudate | 8.02E-10   | 0.000203  | 0.168726 | other          | 0          |
| <i>STAT4</i>    | Caudate | 7.26E-08   | -0.0001   | 0.488534 | other          | 0          |
| <i>STAT5A</i>   | Caudate | 9.55E-10   | 0.000709  | 6.13E-08 | increasing     | 0          |
| <i>STAT6</i>    | Caudate | 4.08E-13   | 0.00074   | 1.34E-08 | increasing     | 0          |
| <i>STC1</i>     | Caudate | 1.86E-09   | -0.00079  | 1.13E-09 | decreasing     | 0          |
| <i>STK11</i>    | Caudate | 7.76E-12   | 0.000538  | 0.000194 | other          | 0          |
| <i>STK11IP</i>  | Caudate | 1.48E-08   | 0.000598  | 2.17E-05 | increasing     | 0          |
| <i>STK39</i>    | Caudate | 1.63E-07   | 0.000354  | 0.015994 | other          | 0          |
| <i>STMN2</i>    | Caudate | 1.29E-12   | -0.00083  | 1.16E-11 | decreasing     | 0          |
| <i>STMN3</i>    | Caudate | 1.60E-07   | 0.000322  | 0.032265 | other          | 1          |
| <i>STOML1</i>   | Caudate | 3.72E-08   | 8.09E-05  | 0.595345 | other          | 0          |
| <i>STRADB</i>   | Caudate | 3.68E-12   | -0.0008   | 1.89E-10 | decreasing     | 0          |
| <i>STRBP</i>    | Caudate | 2.83E-10   | -0.00076  | 8.10E-09 | decreasing     | 1          |
| <i>STRC</i>     | Caudate | 3.76E-13   | 0.000833  | 2.26E-11 | increasing     | 0          |
| <i>STRIP2</i>   | Caudate | 7.39E-10   | -0.00074  | 2.92E-08 | decreasing     | 1          |
| <i>STRN</i>     | Caudate | 6.05E-10   | -0.00084  | 2.45E-11 | decreasing     | 0          |
| <i>STRN4</i>    | Caudate | 4.07E-09   | -6.39E-05 | 0.672532 | other          | 0          |
| <i>STT3B</i>    | Caudate | 1.95E-08   | -0.00077  | 7.34E-09 | decreasing     | 0          |
| <i>STUB1</i>    | Caudate | 5.44E-08   | 0.000481  | 0.000956 | other          | 0          |
| <i>STX7</i>     | Caudate | 2.61E-06   | -0.00071  | 2.18E-07 | decreasing     | 0          |
| <i>STXBP3</i>   | Caudate | 1.24E-08   | 9.60E-05  | 0.523504 | other          | 0          |
| <i>STXBP5</i>   | Caudate | 5.78E-07   | -0.00071  | 1.71E-07 | decreasing     | 0          |
| <i>STXBP5L</i>  | Caudate | 2.40E-08   | -0.00023  | 0.112936 | other          | 0          |
| <i>STXBP6</i>   | Caudate | 1.64E-11   | -0.00084  | 5.94E-11 | decreasing     | 0          |
| <i>STYX</i>     | Caudate | 1.44E-09   | -0.00075  | 3.04E-08 | decreasing     | 0          |
| <i>SUCO</i>     | Caudate | 2.32E-07   | -0.00032  | 0.032096 | other          | 0          |
| <i>SUGP2</i>    | Caudate | 5.11E-10   | 0.000248  | 0.098183 | other          | 0          |
| <i>SUGT1</i>    | Caudate | 8.52E-10   | -0.00051  | 0.000471 | other          | 0          |
| <i>SULT1E1</i>  | Caudate | 8.35E-11   | -0.00073  | 3.18E-08 | decreasing     | 0          |
| <i>SUN2</i>     | Caudate | 1.92E-16   | 0.000847  | 9.82E-13 | increasing     | 0          |
| <i>SUPT20H</i>  | Caudate | 4.73E-10   | -0.00026  | 0.085278 | other          | 0          |
| <i>SUPT5H</i>   | Caudate | 3.78E-08   | 0.000291  | 0.049936 | other          | 0          |

**Supplementary Table 9. Genes with a significant age effect from either ANOVA or linear regression. Beta is the regression coefficient, Pval is the p-value for the regression coefficient of expression on age (in days). Effect category is increasing if beta is positive and significant, decreasing if beta is negative and significant, and other if the ANOVA were significant rather than the linear regression. Local eQTL is 1 if the gene had a significant local eQTL**

| Gene            | Tissue  | Anova.pval | Beta      | Pval     | EffectCategory | Local eQTL |
|-----------------|---------|------------|-----------|----------|----------------|------------|
| <i>SURF4</i>    | Caudate | 4.75E-08   | 0.000559  | 0.000103 | other          | 0          |
| <i>SUV420H1</i> | Caudate | 6.49E-10   | -0.00065  | 1.88E-06 | decreasing     | 0          |
| <i>SUV420H2</i> | Caudate | 2.39E-07   | 0.000263  | 0.076033 | other          | 0          |
| <i>SUZ12</i>    | Caudate | 6.87E-08   | -0.0006   | 2.12E-05 | decreasing     | 0          |
| <i>SVEP1</i>    | Caudate | 1.02E-11   | 0.000834  | 5.15E-11 | increasing     | 0          |
| <i>SVIP</i>     | Caudate | 2.20E-07   | 3.57E-05  | 0.81245  | other          | 0          |
| <i>SWT1</i>     | Caudate | 9.92E-08   | -8.87E-05 | 0.560996 | other          | 0          |
| <i>SYMPK</i>    | Caudate | 5.05E-09   | 0.000719  | 9.07E-08 | increasing     | 0          |
| <i>SYN2</i>     | Caudate | 4.55E-08   | 0.000772  | 6.64E-09 | increasing     | 0          |
| <i>SYNCRIP</i>  | Caudate | 1.18E-14   | -0.00083  | 3.24E-11 | decreasing     | 0          |
| <i>SYNDIG1</i>  | Caudate | 8.16E-08   | -0.00061  | 1.58E-05 | decreasing     | 0          |
| <i>SYNDIG1L</i> | Caudate | 2.97E-10   | -0.00073  | 7.44E-08 | decreasing     | 0          |
| <i>SYNE2</i>    | Caudate | 4.52E-09   | -0.00062  | 6.19E-06 | decreasing     | 0          |
| <i>SYNGR3</i>   | Caudate | 1.20E-07   | 0.000491  | 0.000697 | other          | 0          |
| <i>SYNJ1</i>    | Caudate | 4.53E-08   | -0.00012  | 0.401754 | other          | 0          |
| <i>SYNJ2</i>    | Caudate | 1.12E-08   | 0.000805  | 3.76E-10 | increasing     | 0          |
| <i>SYNJ2BP</i>  | Caudate | 1.45E-07   | -0.00065  | 2.81E-06 | decreasing     | 0          |
| <i>SYNM</i>     | Caudate | 3.84E-12   | 0.000622  | 9.90E-06 | increasing     | 1          |
| <i>SYNPO</i>    | Caudate | 1.12E-09   | 0.000198  | 0.173118 | other          | 0          |
| <i>SYP</i>      | Caudate | 5.90E-08   | -0.00058  | 3.86E-05 | decreasing     | 0          |
| <i>SYPL1</i>    | Caudate | 1.68E-10   | -0.00056  | 8.73E-05 | decreasing     | 0          |
| <i>SYT10</i>    | Caudate | 1.03E-10   | -0.00062  | 5.24E-06 | decreasing     | 0          |
| <i>SYT12</i>    | Caudate | 2.24E-10   | 0.00054   | 8.28E-05 | increasing     | 0          |
| <i>SYT17</i>    | Caudate | 8.48E-13   | -0.00073  | 3.63E-08 | decreasing     | 0          |
| <i>SYT2</i>     | Caudate | 4.15E-11   | 0.000622  | 5.25E-06 | increasing     | 1          |
| <i>SYTL1</i>    | Caudate | 3.76E-20   | 0.000881  | 2.40E-13 | increasing     | 0          |
| <i>TAB1</i>     | Caudate | 2.16E-14   | 0.000261  | 0.0791   | other          | 0          |
| <i>TACC3</i>    | Caudate | 2.46E-09   | -1.90E-05 | 0.899561 | other          | 0          |
| <i>TADA2B</i>   | Caudate | 1.48E-11   | 0.000362  | 0.014444 | other          | 0          |
| <i>TAF1B</i>    | Caudate | 1.18E-08   | -0.00074  | 1.48E-08 | decreasing     | 0          |
| <i>TAF2</i>     | Caudate | 5.68E-09   | -0.00075  | 1.20E-08 | decreasing     | 0          |
| <i>TAF3</i>     | Caudate | 2.55E-07   | -1.11E-05 | 0.940878 | other          | 0          |
| <i>TAF6L</i>    | Caudate | 9.32E-11   | 0.000529  | 0.000222 | other          | 0          |
| <i>TAF9B</i>    | Caudate | 4.88E-08   | -0.00052  | 0.000365 | other          | 0          |
| <i>TANGO2</i>   | Caudate | 6.87E-09   | 0.000745  | 3.02E-08 | increasing     | 0          |
| <i>TANGO6</i>   | Caudate | 1.82E-12   | 0.000448  | 0.001987 | other          | 0          |
| <i>TANK</i>     | Caudate | 8.49E-07   | -0.00072  | 5.33E-08 | decreasing     | 0          |
| <i>TAOK2</i>    | Caudate | 8.26E-12   | 1.14E-05  | 0.939271 | other          | 0          |
| <i>TAP2</i>     | Caudate | 4.69E-10   | 0.000773  | 5.71E-09 | increasing     | 0          |
| <i>TARSL2</i>   | Caudate | 2.93E-13   | 0.000709  | 1.11E-07 | increasing     | 0          |

**Supplementary Table 9. Genes with a significant age effect from either ANOVA or linear regression. Beta is the regression coefficient, Pval is the p-value for the regression coefficient of expression on age (in days). Effect category is increasing if beta is positive and significant, decreasing if beta is negative and significant, and other if the ANOVA were significant rather than the linear regression. Local eQTL is 1 if the gene had a significant local eQTL**

| Gene            | Tissue  | Anova.pval | Beta      | Pval     | EffectCategory | Local eQTL |
|-----------------|---------|------------|-----------|----------|----------------|------------|
| <i>TATDN2</i>   | Caudate | 3.80E-08   | -4.21E-05 | 0.77818  | other          | 0          |
| <i>TAX1BP1</i>  | Caudate | 7.75E-11   | -0.00026  | 0.06882  | other          | 0          |
| <i>TBC1D1</i>   | Caudate | 7.29E-16   | 0.000874  | 6.81E-13 | increasing     | 0          |
| <i>TBC1D10B</i> | Caudate | 9.04E-12   | 0.000459  | 0.001795 | other          | 0          |
| <i>TBC1D13</i>  | Caudate | 6.85E-09   | 0.000788  | 2.23E-09 | increasing     | 0          |
| <i>TBC1D14</i>  | Caudate | 5.77E-10   | -2.96E-05 | 0.843063 | other          | 0          |
| <i>TBC1D15</i>  | Caudate | 8.91E-09   | -0.00023  | 0.131269 | other          | 0          |
| <i>TBC1D16</i>  | Caudate | 1.55E-08   | 0.000329  | 0.027346 | other          | 0          |
| <i>TBC1D17</i>  | Caudate | 9.03E-11   | 0.000804  | 4.56E-10 | increasing     | 0          |
| <i>TBC1D22A</i> | Caudate | 7.61E-10   | 0.000708  | 2.22E-07 | increasing     | 0          |
| <i>TBC1D2B</i>  | Caudate | 2.70E-07   | 0.000774  | 5.63E-09 | increasing     | 0          |
| <i>TBC1D4</i>   | Caudate | 1.72E-17   | 0.000808  | 2.10E-10 | increasing     | 0          |
| <i>TBC1D8B</i>  | Caudate | 3.90E-08   | -0.00037  | 0.011168 | other          | 0          |
| <i>TBC1D9</i>   | Caudate | 3.66E-09   | -0.00061  | 1.05E-05 | decreasing     | 0          |
| <i>TBC1D9B</i>  | Caudate | 7.17E-11   | 0.000614  | 1.41E-05 | increasing     | 0          |
| <i>TBCB</i>     | Caudate | 3.78E-09   | 0.000219  | 0.146353 | other          | 0          |
| <i>TBCEL</i>    | Caudate | 4.87E-07   | -0.00079  | 1.14E-09 | decreasing     | 0          |
| <i>TBL1XR1</i>  | Caudate | 1.79E-10   | -0.00082  | 1.95E-10 | decreasing     | 0          |
| <i>TBL2</i>     | Caudate | 1.17E-08   | 0.000135  | 0.369664 | other          | 0          |
| <i>TBL3</i>     | Caudate | 4.95E-09   | 0.000584  | 4.28E-05 | increasing     | 0          |
| <i>TBRG4</i>    | Caudate | 4.25E-08   | 0.000214  | 0.158576 | other          | 0          |
| <i>TCAP</i>     | Caudate | 7.71E-07   | 0.000726  | 8.99E-08 | increasing     | 0          |
| <i>TCEAL6</i>   | Caudate | 1.46E-07   | 0.000171  | 0.251493 | other          | 0          |
| <i>TCEB1</i>    | Caudate | 2.62E-10   | -0.00058  | 3.30E-05 | decreasing     | 0          |
| <i>TCERG1</i>   | Caudate | 2.49E-09   | -0.00077  | 8.17E-09 | decreasing     | 0          |
| <i>TCF25</i>    | Caudate | 4.74E-10   | 0.000467  | 0.001454 | other          | 0          |
| <i>TCF3</i>     | Caudate | 1.98E-09   | 0.000234  | 0.117356 | other          | 0          |
| <i>TCF4</i>     | Caudate | 2.42E-08   | -0.0007   | 1.19E-07 | decreasing     | 0          |
| <i>TCHP</i>     | Caudate | 3.79E-09   | 0.000794  | 1.45E-09 | increasing     | 0          |
| <i>TDG</i>      | Caudate | 7.76E-13   | -0.00079  | 6.82E-10 | decreasing     | 0          |
| <i>TECPR1</i>   | Caudate | 2.03E-08   | 0.000501  | 0.000589 | other          | 0          |
| <i>TECR</i>     | Caudate | 1.85E-12   | 0.000756  | 7.23E-09 | increasing     | 0          |
| <i>TELO2</i>    | Caudate | 4.73E-11   | 0.000461  | 0.00116  | other          | 0          |
| <i>TENC1</i>    | Caudate | 3.50E-07   | 0.00074   | 2.11E-08 | increasing     | 0          |
| <i>TENM3</i>    | Caudate | 9.53E-11   | -0.00058  | 2.50E-05 | decreasing     | 0          |
| <i>TEP1</i>     | Caudate | 4.48E-09   | 0.000695  | 4.36E-07 | increasing     | 0          |
| <i>TEPP</i>     | Caudate | 9.72E-08   | 0.000713  | 1.54E-07 | increasing     | 0          |
| <i>TERF1</i>    | Caudate | 1.43E-09   | -0.00053  | 0.000274 | other          | 0          |
| <i>TERF2</i>    | Caudate | 1.04E-12   | 0.000122  | 0.402905 | other          | 0          |
| <i>TERT</i>     | Caudate | 1.36E-12   | 0.000752  | 1.08E-08 | increasing     | 0          |

**Supplementary Table 9. Genes with a significant age effect from either ANOVA or linear regression. Beta is the regression coefficient, Pval is the p-value for the regression coefficient of expression on age (in days). Effect category is increasing if beta is positive and significant, decreasing if beta is negative and significant, and other if the ANOVA were significant rather than the linear regression. Local eQTL is 1 if the gene had a significant local eQTL**

| Gene            | Tissue  | Anova.pval | Beta      | Pval     | EffectCategory | Local eQTL |
|-----------------|---------|------------|-----------|----------|----------------|------------|
| <i>TESK1</i>    | Caudate | 2.56E-09   | 0.000617  | 1.14E-05 | increasing     | 0          |
| <i>TESK2</i>    | Caudate | 1.06E-16   | 0.000838  | 6.14E-12 | increasing     | 0          |
| <i>TET1</i>     | Caudate | 7.59E-13   | -0.00072  | 3.33E-08 | decreasing     | 0          |
| <i>TET2</i>     | Caudate | 1.14E-11   | -0.00059  | 2.72E-05 | decreasing     | 0          |
| <i>TET3</i>     | Caudate | 8.26E-08   | -0.00074  | 5.10E-08 | decreasing     | 0          |
| <i>TEX2</i>     | Caudate | 7.84E-09   | 0.00062   | 4.81E-06 | increasing     | 0          |
| <i>TEX264</i>   | Caudate | 5.74E-08   | 0.000645  | 3.92E-06 | increasing     | 0          |
| <i>TEX37</i>    | Caudate | 5.62E-13   | -0.00026  | 0.010805 | other          | 0          |
| <i>TFAP4</i>    | Caudate | 4.26E-13   | 0.000829  | 1.34E-10 | increasing     | 0          |
| <i>TFDP1</i>    | Caudate | 2.66E-08   | -0.0007   | 1.39E-07 | decreasing     | 0          |
| <i>TFE3</i>     | Caudate | 7.90E-10   | 0.000719  | 6.33E-08 | increasing     | 0          |
| <i>TFG</i>      | Caudate | 5.72E-10   | -0.00058  | 5.26E-05 | decreasing     | 0          |
| <i>TFRC</i>     | Caudate | 3.83E-09   | -0.00072  | 1.48E-07 | decreasing     | 0          |
| <i>TGFA</i>     | Caudate | 1.66E-07   | -0.00067  | 5.17E-07 | decreasing     | 1          |
| <i>TGFBR1</i>   | Caudate | 1.31E-08   | -0.00074  | 2.53E-08 | decreasing     | 1          |
| <i>TGFBRAP1</i> | Caudate | 6.17E-12   | 9.02E-05  | 0.550366 | other          | 0          |
| <i>THAP4</i>    | Caudate | 1.39E-08   | 0.000674  | 9.02E-07 | increasing     | 0          |
| <i>THEM6</i>    | Caudate | 2.07E-08   | 0.000498  | 0.000604 | other          | 1          |
| <i>THOC5</i>    | Caudate | 4.13E-09   | 0.00016   | 0.282662 | other          | 0          |
| <i>THOP1</i>    | Caudate | 1.37E-11   | 0.00058   | 4.80E-05 | increasing     | 0          |
| <i>THPO</i>     | Caudate | 1.79E-07   | 0.00073   | 5.67E-08 | increasing     | 0          |
| <i>THRA</i>     | Caudate | 1.69E-13   | 0.000759  | 1.34E-08 | increasing     | 0          |
| <i>THSD7A</i>   | Caudate | 5.24E-06   | -0.00072  | 4.66E-08 | decreasing     | 0          |
| <i>THY1</i>     | Caudate | 1.02E-08   | -9.07E-05 | 0.543841 | other          | 0          |
| <i>TIAM2</i>    | Caudate | 3.52E-08   | -0.0006   | 1.97E-05 | decreasing     | 0          |
| <i>TIGD5</i>    | Caudate | 3.70E-10   | 0.000429  | 0.003295 | other          | 0          |
| <i>TIMM13</i>   | Caudate | 1.64E-09   | 1.16E-05  | 0.939074 | other          | 0          |
| <i>TIMM17B</i>  | Caudate | 5.78E-08   | 0.000262  | 0.083578 | other          | 0          |
| <i>TIMP2</i>    | Caudate | 4.65E-09   | 0.000369  | 0.01057  | other          | 0          |
| <i>TJAP1</i>    | Caudate | 3.42E-14   | 0.000857  | 9.00E-12 | increasing     | 0          |
| <i>TJP1</i>     | Caudate | 5.85E-12   | 0.000417  | 0.003845 | other          | 0          |
| <i>TJP2</i>     | Caudate | 4.79E-09   | 0.000667  | 1.12E-06 | increasing     | 0          |
| <i>TK2</i>      | Caudate | 1.77E-07   | 0.000483  | 0.000892 | other          | 0          |
| <i>TKT</i>      | Caudate | 6.31E-09   | 0.000456  | 0.001874 | other          | 0          |
| <i>TLK1</i>     | Caudate | 1.74E-10   | -0.00037  | 0.010627 | other          | 0          |
| <i>TLN2</i>     | Caudate | 4.01E-11   | -0.00051  | 0.000403 | other          | 0          |
| <i>TLR1</i>     | Caudate | 5.19E-07   | -0.00074  | 2.89E-08 | decreasing     | 0          |
| <i>TM6SF2</i>   | Caudate | 9.77E-07   | 0.000779  | 3.78E-09 | increasing     | 0          |
| <i>TM7SF2</i>   | Caudate | 4.94E-08   | -0.00022  | 0.141244 | other          | 0          |
| <i>TM9SF2</i>   | Caudate | 4.60E-08   | -0.00077  | 9.13E-09 | decreasing     | 0          |



**Supplementary Table 9. Genes with a significant age effect from either ANOVA or linear regression. Beta is the regression coefficient, Pval is the p-value for the regression coefficient of expression on age (in days). Effect category is increasing if beta is positive and significant, decreasing if beta is negative and significant, and other if the ANOVA were significant rather than the linear regression. Local eQTL is 1 if the gene had a significant local eQTL**

| Gene            | Tissue  | Anova.pval | Beta      | Pval     | EffectCategory | Local eQTL |
|-----------------|---------|------------|-----------|----------|----------------|------------|
| <i>TM9SF3</i>   | Caudate | 7.41E-08   | -0.00076  | 1.76E-08 | decreasing     | 0          |
| <i>TMBIM1</i>   | Caudate | 3.67E-13   | 0.000777  | 1.23E-09 | increasing     | 0          |
| <i>TMC6</i>     | Caudate | 9.46E-15   | 0.000841  | 7.70E-12 | increasing     | 0          |
| <i>TMC7</i>     | Caudate | 5.43E-07   | 0.000735  | 1.37E-08 | increasing     | 0          |
| <i>TMCC2</i>    | Caudate | 2.92E-10   | 0.000799  | 7.37E-11 | increasing     | 0          |
| <i>TMED7</i>    | Caudate | 1.68E-09   | -0.00058  | 4.96E-05 | decreasing     | 0          |
| <i>TMEM106B</i> | Caudate | 4.63E-08   | -0.00066  | 2.68E-06 | decreasing     | 0          |
| <i>TMEM108</i>  | Caudate | 3.18E-08   | -0.00056  | 6.47E-05 | decreasing     | 0          |
| <i>TMEM109</i>  | Caudate | 1.04E-12   | 0.000818  | 3.62E-11 | increasing     | 0          |
| <i>TMEM115</i>  | Caudate | 1.51E-07   | 0.000163  | 0.280032 | other          | 0          |
| <i>TMEM117</i>  | Caudate | 6.49E-06   | -0.00072  | 1.23E-07 | decreasing     | 0          |
| <i>TMEM120A</i> | Caudate | 5.69E-08   | 0.000309  | 0.034927 | other          | 0          |
| <i>TMEM121</i>  | Caudate | 4.56E-10   | 0.000271  | 0.068836 | other          | 0          |
| <i>TMEM125</i>  | Caudate | 1.95E-15   | 0.000821  | 4.47E-11 | increasing     | 0          |
| <i>TMEM132A</i> | Caudate | 2.59E-10   | 0.000243  | 0.104598 | other          | 0          |
| <i>TMEM132C</i> | Caudate | 2.60E-07   | 0.000723  | 5.67E-08 | increasing     | 0          |
| <i>TMEM132D</i> | Caudate | 1.39E-07   | 0.000569  | 2.83E-05 | increasing     | 0          |
| <i>TMEM134</i>  | Caudate | 4.88E-08   | 0.000563  | 8.91E-05 | increasing     | 0          |
| <i>TMEM135</i>  | Caudate | 5.18E-08   | -0.00072  | 1.55E-07 | decreasing     | 0          |
| <i>TMEM144</i>  | Caudate | 3.21E-09   | 0.000622  | 6.60E-06 | increasing     | 0          |
| <i>TMEM145</i>  | Caudate | 9.56E-08   | 0.000324  | 0.029793 | other          | 0          |
| <i>TMEM150C</i> | Caudate | 5.49E-11   | -0.0008   | 4.93E-10 | decreasing     | 1          |
| <i>TMEM151B</i> | Caudate | 1.03E-09   | -0.00018  | 0.232428 | other          | 0          |
| <i>TMEM161A</i> | Caudate | 2.46E-07   | 0.000421  | 0.003616 | other          | 0          |
| <i>TMEM161B</i> | Caudate | 1.54E-06   | -0.00072  | 3.31E-08 | decreasing     | 0          |
| <i>TMEM163</i>  | Caudate | 7.45E-18   | -0.0009   | 8.79E-14 | decreasing     | 0          |
| <i>TMEM168</i>  | Caudate | 2.83E-10   | -0.00076  | 1.21E-09 | decreasing     | 1          |
| <i>TMEM169</i>  | Caudate | 1.26E-08   | -0.00052  | 0.000194 | other          | 0          |
| <i>TMEM170B</i> | Caudate | 3.56E-08   | -0.00068  | 6.86E-07 | decreasing     | 0          |
| <i>TMEM175</i>  | Caudate | 1.28E-08   | 0.000355  | 0.016117 | other          | 0          |
| <i>TMEM178B</i> | Caudate | 1.79E-07   | -0.00044  | 0.002242 | other          | 0          |
| <i>TMEM185B</i> | Caudate | 9.46E-08   | 8.94E-05  | 0.551494 | other          | 0          |
| <i>TMEM191C</i> | Caudate | 1.47E-12   | 0.000642  | 2.57E-06 | increasing     | 0          |
| <i>TMEM196</i>  | Caudate | 1.29E-09   | -0.00077  | 6.70E-09 | decreasing     | 1          |
| <i>TMEM203</i>  | Caudate | 2.40E-07   | -4.44E-05 | 0.770925 | other          | 0          |
| <i>TMEM235</i>  | Caudate | 3.48E-18   | 0.000857  | 3.44E-12 | increasing     | 0          |
| <i>TMEM240</i>  | Caudate | 1.66E-09   | 0.000134  | 0.378994 | other          | 0          |
| <i>TMEM246</i>  | Caudate | 2.69E-06   | 0.000759  | 2.85E-09 | increasing     | 0          |
| <i>TMEM257</i>  | Caudate | 2.38E-07   | -0.00069  | 4.70E-07 | decreasing     | 0          |
| <i>TMEM259</i>  | Caudate | 4.84E-11   | 0.000378  | 0.0096   | other          | 0          |

**Supplementary Table 9. Genes with a significant age effect from either ANOVA or linear regression. Beta is the regression coefficient, Pval is the p-value for the regression coefficient of expression on age (in days). Effect category is increasing if beta is positive and significant, decreasing if beta is negative and significant, and other if the ANOVA were significant rather than the linear regression. Local eQTL is 1 if the gene had a significant local eQTL**

| Gene            | Tissue  | Anova.pval | Beta     | Pval     | EffectCategory | Local eQTL |
|-----------------|---------|------------|----------|----------|----------------|------------|
| <i>TMEM263</i>  | Caudate | 1.98E-08   | -0.00061 | 1.59E-05 | decreasing     | 0          |
| <i>TMEM30B</i>  | Caudate | 1.92E-09   | 0.000786 | 2.46E-09 | increasing     | 0          |
| <i>TMEM33</i>   | Caudate | 3.17E-09   | -0.00067 | 1.63E-06 | decreasing     | 0          |
| <i>TMEM43</i>   | Caudate | 7.68E-08   | 0.000536 | 0.00016  | other          | 0          |
| <i>TMEM45A</i>  | Caudate | 4.96E-08   | 3.85E-05 | 0.798565 | other          | 0          |
| <i>TMEM55A</i>  | Caudate | 1.23E-07   | -0.00017 | 0.264308 | other          | 0          |
| <i>TMEM63C</i>  | Caudate | 1.89E-07   | 0.000716 | 5.53E-08 | increasing     | 0          |
| <i>TMEM65</i>   | Caudate | 9.21E-12   | -0.00081 | 2.98E-10 | decreasing     | 0          |
| <i>TMEM68</i>   | Caudate | 1.58E-05   | -0.00072 | 4.60E-08 | decreasing     | 0          |
| <i>TMEM74B</i>  | Caudate | 7.32E-16   | 0.00083  | 5.08E-11 | increasing     | 0          |
| <i>TMEM87B</i>  | Caudate | 2.69E-08   | -0.00034 | 0.022503 | other          | 0          |
| <i>TMEM88B</i>  | Caudate | 4.87E-14   | 0.000791 | 9.57E-10 | increasing     | 0          |
| <i>TMEM91</i>   | Caudate | 4.83E-10   | 0.000664 | 1.48E-06 | increasing     | 0          |
| <i>TMF1</i>     | Caudate | 1.31E-07   | -0.0006  | 2.25E-05 | decreasing     | 0          |
| <i>TMOD1</i>    | Caudate | 2.02E-07   | 0.000469 | 0.00078  | other          | 0          |
| <i>TMPRSS5</i>  | Caudate | 5.45E-10   | 0.000807 | 5.75E-10 | increasing     | 0          |
| <i>TNFAIP2</i>  | Caudate | 8.52E-10   | 0.000565 | 5.37E-05 | increasing     | 0          |
| <i>TNFAIP6</i>  | Caudate | 1.62E-09   | 0.000686 | 3.15E-07 | increasing     | 0          |
| <i>TNFRSF14</i> | Caudate | 4.21E-08   | 0.000735 | 4.98E-08 | increasing     | 0          |
| <i>TNFRSF21</i> | Caudate | 1.50E-12   | -0.00082 | 9.54E-11 | decreasing     | 0          |
| <i>TNFSF9</i>   | Caudate | 3.06E-11   | 0.000729 | 4.00E-08 | increasing     | 1          |
| <i>TNIP1</i>    | Caudate | 4.71E-13   | 0.00078  | 6.66E-10 | increasing     | 0          |
| <i>TNK2</i>     | Caudate | 2.34E-10   | 0.000759 | 1.28E-08 | increasing     | 0          |
| <i>TNKS1BP1</i> | Caudate | 8.88E-11   | 0.000553 | 0.000113 | other          | 0          |
| <i>TNKS2</i>    | Caudate | 9.07E-08   | -0.00042 | 0.004208 | other          | 1          |
| <i>TNNC2</i>    | Caudate | 2.48E-10   | 0.000763 | 6.10E-09 | increasing     | 0          |
| <i>TNXB</i>     | Caudate | 5.52E-11   | 0.000808 | 5.04E-10 | increasing     | 0          |
| <i>TOB1</i>     | Caudate | 4.72E-09   | 0.000141 | 0.356477 | other          | 0          |
| <i>TOLLIP</i>   | Caudate | 8.90E-09   | 0.000653 | 2.20E-06 | increasing     | 0          |
| <i>TOM1</i>     | Caudate | 8.14E-08   | 0.00029  | 0.05541  | other          | 0          |
| <i>TOMM34</i>   | Caudate | 1.03E-09   | 0.000473 | 0.000828 | other          | 0          |
| <i>TOMM40</i>   | Caudate | 1.83E-07   | 3.11E-05 | 0.838812 | other          | 0          |
| <i>TOP1</i>     | Caudate | 1.54E-07   | -0.00067 | 1.26E-06 | decreasing     | 0          |
| <i>TOP2B</i>    | Caudate | 8.58E-15   | -0.00086 | 7.53E-12 | decreasing     | 0          |
| <i>TOP3B</i>    | Caudate | 1.98E-08   | 0.000405 | 0.006347 | other          | 0          |
| <i>TOPBP1</i>   | Caudate | 2.51E-09   | -0.00065 | 2.70E-06 | decreasing     | 0          |
| <i>TOX</i>      | Caudate | 6.59E-09   | -0.00046 | 0.001126 | other          | 0          |
| <i>TOX3</i>     | Caudate | 9.94E-11   | -0.00051 | 0.000427 | other          | 0          |
| <i>TP53BP2</i>  | Caudate | 5.78E-08   | 0.000103 | 0.498628 | other          | 0          |
| <i>TPCN1</i>    | Caudate | 3.99E-09   | 0.000798 | 7.74E-10 | increasing     | 0          |

**Supplementary Table 9. Genes with a significant age effect from either ANOVA or linear regression. Beta is the regression coefficient, Pval is the p-value for the regression coefficient of expression on age (in days). Effect category is increasing if beta is positive and significant, decreasing if beta is negative and significant, and other if the ANOVA were significant rather than the linear regression. Local eQTL is 1 if the gene had a significant local eQTL**

| Gene            | Tissue  | Anova.pval | Beta     | Pval     | EffectCategory | Local eQTL |
|-----------------|---------|------------|----------|----------|----------------|------------|
| <i>TPD52L1</i>  | Caudate | 1.56E-07   | 0.000216 | 0.143107 | other          | 0          |
| <i>TPD52L2</i>  | Caudate | 1.11E-13   | 0.000723 | 7.84E-08 | increasing     | 0          |
| <i>TPGS1</i>    | Caudate | 5.66E-10   | 0.000151 | 0.322672 | other          | 0          |
| <i>TPP2</i>     | Caudate | 1.89E-06   | -0.00076 | 8.75E-09 | decreasing     | 0          |
| <i>TPPP</i>     | Caudate | 4.12E-09   | 0.000801 | 3.44E-10 | increasing     | 0          |
| <i>TPRA1</i>    | Caudate | 3.10E-09   | 0.000443 | 0.002559 | other          | 0          |
| <i>TPRG1L</i>   | Caudate | 5.64E-15   | 0.000718 | 4.79E-08 | increasing     | 0          |
| <i>TPRN</i>     | Caudate | 1.21E-12   | 0.000817 | 1.36E-10 | increasing     | 0          |
| <i>TRADD</i>    | Caudate | 6.43E-09   | 0.000547 | 0.000149 | other          | 0          |
| <i>TRAF3</i>    | Caudate | 8.93E-10   | -0.00054 | 0.000114 | other          | 0          |
| <i>TRAF7</i>    | Caudate | 1.10E-07   | 0.000378 | 0.010897 | other          | 0          |
| <i>TRAM1</i>    | Caudate | 1.18E-07   | -0.00074 | 4.52E-09 | decreasing     | 0          |
| <i>TRANK1</i>   | Caudate | 1.41E-09   | 0.00024  | 0.107177 | other          | 0          |
| <i>TRAP1</i>    | Caudate | 5.35E-09   | 0.000452 | 0.002154 | other          | 0          |
| <i>TRAPPC10</i> | Caudate | 3.22E-11   | 0.000696 | 1.64E-07 | increasing     | 1          |
| <i>TRAPPC12</i> | Caudate | 1.56E-12   | 0.000778 | 4.64E-09 | increasing     | 0          |
| <i>TRAPPC5</i>  | Caudate | 3.79E-10   | 0.000468 | 0.001426 | other          | 0          |
| <i>TRDMT1</i>   | Caudate | 9.16E-09   | -0.00069 | 3.06E-07 | decreasing     | 0          |
| <i>TRIB1</i>    | Caudate | 4.91E-08   | -0.00033 | 0.025982 | other          | 0          |
| <i>TRIB2</i>    | Caudate | 2.44E-19   | -0.0009  | 1.57E-14 | decreasing     | 0          |
| <i>TRIM24</i>   | Caudate | 1.20E-11   | -0.00078 | 3.15E-09 | decreasing     | 0          |
| <i>TRIM26</i>   | Caudate | 1.01E-05   | 0.000724 | 9.71E-08 | increasing     | 0          |
| <i>TRIM27</i>   | Caudate | 4.13E-10   | 5.13E-05 | 0.729583 | other          | 0          |
| <i>TRIM28</i>   | Caudate | 8.17E-12   | 0.000313 | 0.031577 | other          | 0          |
| <i>TRIM3</i>    | Caudate | 6.67E-10   | 0.000796 | 1.44E-09 | increasing     | 0          |
| <i>TRIM35</i>   | Caudate | 1.84E-11   | 0.000576 | 5.25E-05 | increasing     | 0          |
| <i>TRIM54</i>   | Caudate | 3.40E-08   | -0.00035 | 0.018128 | other          | 0          |
| <i>TRIM65</i>   | Caudate | 1.07E-05   | 0.000739 | 4.53E-08 | increasing     | 1          |
| <i>TRIO</i>     | Caudate | 1.80E-10   | -0.00025 | 0.091196 | other          | 0          |
| <i>TRIP11</i>   | Caudate | 3.45E-08   | -0.00036 | 0.015864 | other          | 0          |
| <i>TRIP12</i>   | Caudate | 1.23E-08   | -0.00023 | 0.107592 | other          | 0          |
| <i>TRMT1</i>    | Caudate | 1.20E-09   | 0.000339 | 0.022202 | other          | 0          |
| <i>TRMT10A</i>  | Caudate | 7.53E-08   | -0.00024 | 0.108597 | other          | 0          |
| <i>TRMT13</i>   | Caudate | 3.18E-08   | -0.00049 | 0.000742 | other          | 0          |
| <i>TRMT2A</i>   | Caudate | 9.09E-09   | 0.00026  | 0.078431 | other          | 0          |
| <i>TRMT61A</i>  | Caudate | 5.31E-09   | 0.000358 | 0.01571  | other          | 0          |
| <i>TRNT1</i>    | Caudate | 2.33E-12   | -0.00087 | 2.30E-12 | decreasing     | 0          |
| <i>TROVE2</i>   | Caudate | 2.42E-11   | -0.00078 | 3.18E-09 | decreasing     | 0          |
| <i>TRPC1</i>    | Caudate | 1.46E-07   | -0.00071 | 3.33E-08 | decreasing     | 0          |
| <i>TRPC4</i>    | Caudate | 1.36E-10   | -0.00077 | 6.55E-09 | decreasing     | 0          |

**Supplementary Table 9. Genes with a significant age effect from either ANOVA or linear regression. Beta is the regression coefficient, Pval is the p-value for the regression coefficient of expression on age (in days). Effect category is increasing if beta is positive and significant, decreasing if beta is negative and significant, and other if the ANOVA were significant rather than the linear regression. Local eQTL is 1 if the gene had a significant local eQTL**

| Gene           | Tissue  | Anova.pval | Beta      | Pval     | EffectCategory | Local eQTL |
|----------------|---------|------------|-----------|----------|----------------|------------|
| <i>TRPC4AP</i> | Caudate | 8.46E-08   | 0.000322  | 0.031064 | other          | 0          |
| <i>TRPC5</i>   | Caudate | 2.47E-17   | -0.0008   | 3.70E-10 | decreasing     | 0          |
| <i>TRPC5OS</i> | Caudate | 2.00E-11   | -0.00057  | 4.27E-05 | decreasing     | 0          |
| <i>TRPM1</i>   | Caudate | 7.60E-08   | 0.000797  | 1.17E-09 | increasing     | 0          |
| <i>TRPT1</i>   | Caudate | 1.50E-07   | 0.000557  | 0.000107 | other          | 0          |
| <i>TRUB1</i>   | Caudate | 6.90E-07   | -0.00073  | 3.49E-08 | decreasing     | 0          |
| <i>TSC2</i>    | Caudate | 1.31E-11   | 0.000535  | 0.000208 | other          | 0          |
| <i>TSC22D4</i> | Caudate | 4.14E-09   | 0.000719  | 8.32E-08 | increasing     | 0          |
| <i>TSG101</i>  | Caudate | 6.38E-09   | -0.0003   | 0.041779 | other          | 0          |
| <i>TSNARE1</i> | Caudate | 1.62E-07   | 0.000673  | 1.17E-06 | increasing     | 0          |
| <i>TSPAN12</i> | Caudate | 5.16E-11   | -0.00081  | 4.40E-11 | decreasing     | 0          |
| <i>TSPAN13</i> | Caudate | 9.81E-11   | -0.00072  | 1.40E-07 | decreasing     | 0          |
| <i>TSPAN15</i> | Caudate | 2.32E-11   | 0.00077   | 3.49E-09 | increasing     | 0          |
| <i>TSPAN17</i> | Caudate | 2.62E-08   | 0.000694  | 4.66E-07 | increasing     | 0          |
| <i>TSPAN2</i>  | Caudate | 5.84E-10   | -0.00068  | 5.38E-07 | decreasing     | 0          |
| <i>TSPAN7</i>  | Caudate | 8.06E-11   | -0.0004   | 0.006013 | other          | 0          |
| <i>TSPAN9</i>  | Caudate | 8.59E-09   | -0.00056  | 8.55E-05 | decreasing     | 0          |
| <i>TSPEAR</i>  | Caudate | 2.30E-10   | 0.000806  | 9.15E-11 | increasing     | 0          |
| <i>TSPYL1</i>  | Caudate | 1.13E-08   | 0.000618  | 6.26E-06 | increasing     | 0          |
| <i>TSPYL2</i>  | Caudate | 5.16E-09   | 0.000691  | 2.14E-07 | increasing     | 0          |
| <i>TSR1</i>    | Caudate | 3.36E-09   | -4.03E-05 | 0.789205 | other          | 1          |
| <i>TSR3</i>    | Caudate | 1.11E-09   | 0.000422  | 0.00439  | other          | 0          |
| <i>TTBK2</i>   | Caudate | 8.60E-09   | 0.000171  | 0.247467 | other          | 0          |
| <i>TTC1</i>    | Caudate | 2.85E-08   | -2.33E-05 | 0.877108 | other          | 0          |
| <i>TTC3</i>    | Caudate | 2.16E-08   | -0.00055  | 0.000108 | other          | 0          |
| <i>TTC37</i>   | Caudate | 6.21E-07   | -0.00073  | 3.70E-08 | decreasing     | 0          |
| <i>TTC38</i>   | Caudate | 2.29E-13   | 0.000216  | 0.142027 | other          | 0          |
| <i>TPPAL</i>   | Caudate | 6.69E-09   | -0.00066  | 1.12E-06 | decreasing     | 0          |
| <i>TTYH2</i>   | Caudate | 1.57E-14   | 0.000846  | 2.98E-12 | increasing     | 0          |
| <i>TUB</i>     | Caudate | 6.98E-10   | 0.000639  | 3.92E-06 | increasing     | 0          |
| <i>TUBA1A</i>  | Caudate | 1.20E-07   | -0.00068  | 3.19E-07 | decreasing     | 0          |
| <i>TUBG1</i>   | Caudate | 2.55E-07   | -0.00055  | 0.00012  | other          | 0          |
| <i>TUBGCP2</i> | Caudate | 4.06E-10   | 0.000516  | 0.000356 | other          | 0          |
| <i>TUBGCP6</i> | Caudate | 3.20E-11   | 0.000742  | 3.51E-08 | increasing     | 0          |
| <i>TUFT1</i>   | Caudate | 1.17E-07   | 0.000766  | 4.40E-09 | increasing     | 1          |
| <i>TULP4</i>   | Caudate | 8.01E-08   | 0.000371  | 0.010751 | other          | 0          |
| <i>TUSC1</i>   | Caudate | 2.95E-09   | 7.30E-05  | 0.623042 | other          | 0          |
| <i>TXLNA</i>   | Caudate | 1.76E-08   | -0.00016  | 0.265698 | other          | 0          |
| <i>TXNDC5</i>  | Caudate | 3.44E-10   | 0.000804  | 7.66E-10 | increasing     | 0          |
| <i>TXNL1</i>   | Caudate | 1.78E-08   | -0.00044  | 0.002568 | other          | 0          |

**Supplementary Table 9. Genes with a significant age effect from either ANOVA or linear regression. Beta is the regression coefficient, Pval is the p-value for the regression coefficient of expression on age (in days). Effect category is increasing if beta is positive and significant, decreasing if beta is negative and significant, and other if the ANOVA were significant rather than the linear regression. Local eQTL is 1 if the gene had a significant local eQTL**

| Gene             | Tissue  | Anova.pval | Beta      | Pval     | EffectCategory | Local eQTL |
|------------------|---------|------------|-----------|----------|----------------|------------|
| <i>TYRO3</i>     | Caudate | 1.07E-13   | 0.000808  | 8.24E-11 | increasing     | 0          |
| <i>TYSND1</i>    | Caudate | 1.84E-11   | 0.00068   | 8.61E-07 | increasing     | 0          |
| <i>U2AF1</i>     | Caudate | 2.40E-08   | 0.000165  | 0.279351 | other          | 0          |
| <i>U2AF1L4</i>   | Caudate | 1.30E-08   | -0.00044  | 0.002377 | other          | 0          |
| <i>U2AF2</i>     | Caudate | 1.20E-08   | 0.000221  | 0.138907 | other          | 0          |
| <i>U2SURP</i>    | Caudate | 3.62E-09   | -0.00058  | 5.03E-05 | decreasing     | 0          |
| <i>UAP1L1</i>    | Caudate | 1.22E-06   | 0.000723  | 1.06E-07 | increasing     | 0          |
| <i>UBAC1</i>     | Caudate | 2.54E-07   | 0.000515  | 0.000383 | other          | 0          |
| <i>UBASH3B</i>   | Caudate | 1.81E-08   | -0.00069  | 4.36E-07 | decreasing     | 0          |
| <i>UBE2B</i>     | Caudate | 8.89E-11   | -0.00046  | 0.001513 | other          | 0          |
| <i>UBE2E1</i>    | Caudate | 6.62E-11   | -0.0006   | 2.40E-05 | decreasing     | 0          |
| <i>UBE2E2</i>    | Caudate | 1.51E-11   | -0.00062  | 1.21E-05 | decreasing     | 0          |
| <i>UBE2E3</i>    | Caudate | 1.36E-07   | -0.00066  | 1.42E-06 | decreasing     | 0          |
| <i>UBE2G1</i>    | Caudate | 4.46E-10   | -0.00067  | 1.26E-06 | decreasing     | 0          |
| <i>UBE2K</i>     | Caudate | 4.70E-10   | -0.00075  | 2.23E-08 | decreasing     | 0          |
| <i>UBE2O</i>     | Caudate | 2.62E-12   | 0.000191  | 0.208784 | other          | 0          |
| <i>UBE2V1</i>    | Caudate | 4.75E-09   | -0.00032  | 0.034389 | other          | 0          |
| <i>UBE2V2</i>    | Caudate | 1.21E-09   | -0.00063  | 7.66E-06 | decreasing     | 0          |
| <i>UBE2W</i>     | Caudate | 3.64E-06   | -0.00073  | 7.61E-08 | decreasing     | 0          |
| <i>UBE3A</i>     | Caudate | 1.59E-08   | -0.00066  | 2.18E-06 | decreasing     | 0          |
| <i>UBFD1</i>     | Caudate | 5.80E-10   | -0.00061  | 8.99E-06 | decreasing     | 0          |
| <i>UBL4A</i>     | Caudate | 1.88E-07   | -1.74E-05 | 0.906648 | other          | 0          |
| <i>UBLCP1</i>    | Caudate | 5.82E-12   | -0.00067  | 1.49E-06 | decreasing     | 0          |
| <i>UBN1</i>      | Caudate | 1.07E-07   | 0.000417  | 0.004796 | other          | 0          |
| <i>UBOX5</i>     | Caudate | 1.89E-07   | 0.000736  | 2.14E-08 | increasing     | 0          |
| <i>UBP1</i>      | Caudate | 9.75E-08   | 0.000247  | 0.087859 | other          | 0          |
| <i>UBR3</i>      | Caudate | 1.70E-08   | -0.00069  | 5.98E-07 | decreasing     | 0          |
| <i>UBR7</i>      | Caudate | 1.11E-09   | -0.00023  | 0.127767 | other          | 0          |
| <i>UBTD2</i>     | Caudate | 4.33E-10   | -0.0007   | 8.48E-08 | decreasing     | 0          |
| <i>UBXN2B</i>    | Caudate | 2.89E-17   | -0.00086  | 5.99E-12 | decreasing     | 0          |
| <i>UBXN6</i>     | Caudate | 1.25E-10   | 0.000643  | 2.90E-06 | increasing     | 0          |
| <i>UCK1</i>      | Caudate | 1.38E-08   | 0.000484  | 0.000916 | other          | 0          |
| <i>UCK2</i>      | Caudate | 5.45E-09   | -0.00045  | 0.00197  | other          | 0          |
| <i>UCKL1</i>     | Caudate | 7.42E-12   | 0.00059   | 3.19E-05 | increasing     | 0          |
| <i>UFM1</i>      | Caudate | 1.98E-07   | -0.00077  | 8.94E-09 | decreasing     | 0          |
| <i>UGDH</i>      | Caudate | 1.43E-07   | -0.00061  | 1.39E-05 | decreasing     | 0          |
| <i>UGGT2</i>     | Caudate | 1.01E-09   | -0.00072  | 6.21E-08 | decreasing     | 0          |
| <i>UHMK1</i>     | Caudate | 2.15E-07   | -0.0006   | 1.81E-05 | decreasing     | 0          |
| <i>UHRF1BP1L</i> | Caudate | 2.20E-10   | -0.00081  | 4.08E-10 | decreasing     | 0          |
| <i>UNC13B</i>    | Caudate | 7.17E-09   | 0.000489  | 0.000515 | other          | 0          |

**Supplementary Table 9. Genes with a significant age effect from either ANOVA or linear regression. Beta is the regression coefficient, Pval is the p-value for the regression coefficient of expression on age (in days). Effect category is increasing if beta is positive and significant, decreasing if beta is negative and significant, and other if the ANOVA were significant rather than the linear regression. Local eQTL is 1 if the gene had a significant local eQTL**

| Gene          | Tissue  | Anova.pval | Beta     | Pval     | EffectCategory | Local eQTL |
|---------------|---------|------------|----------|----------|----------------|------------|
| <i>UNC13D</i> | Caudate | 8.42E-08   | 0.000785 | 2.59E-09 | increasing     | 0          |
| <i>UNC45A</i> | Caudate | 2.57E-11   | 0.000363 | 0.012531 | other          | 0          |
| <i>UNC5D</i>  | Caudate | 2.06E-08   | 0.000588 | 3.08E-05 | increasing     | 1          |
| <i>UNC80</i>  | Caudate | 1.03E-09   | 0.000711 | 5.55E-08 | increasing     | 0          |
| <i>UPF1</i>   | Caudate | 1.58E-13   | 0.000713 | 1.74E-07 | increasing     | 0          |
| <i>URI1</i>   | Caudate | 4.69E-08   | -0.00041 | 0.005277 | other          | 0          |
| <i>URM1</i>   | Caudate | 4.38E-08   | -0.00031 | 0.034515 | other          | 0          |
| <i>UROD</i>   | Caudate | 8.10E-09   | 0.000632 | 4.03E-06 | increasing     | 0          |
| <i>USF1</i>   | Caudate | 1.30E-08   | -0.00017 | 0.257732 | other          | 0          |
| <i>USH1C</i>  | Caudate | 8.26E-07   | 0.000749 | 2.53E-08 | increasing     | 1          |
| <i>USP11</i>  | Caudate | 2.06E-10   | 0.00081  | 1.07E-10 | increasing     | 0          |
| <i>USP12</i>  | Caudate | 1.81E-08   | -0.00039 | 0.005532 | other          | 0          |
| <i>USP15</i>  | Caudate | 2.12E-10   | -0.00083 | 3.32E-11 | decreasing     | 0          |
| <i>USP19</i>  | Caudate | 1.09E-08   | 0.000251 | 0.094058 | other          | 0          |
| <i>USP20</i>  | Caudate | 2.21E-11   | 0.000806 | 6.47E-10 | increasing     | 0          |
| <i>USP22</i>  | Caudate | 2.12E-11   | 0.000333 | 0.02523  | other          | 0          |
| <i>USP24</i>  | Caudate | 7.03E-08   | -0.00072 | 1.04E-07 | decreasing     | 0          |
| <i>USP35</i>  | Caudate | 5.20E-10   | 0.000667 | 8.91E-07 | increasing     | 0          |
| <i>USP38</i>  | Caudate | 1.37E-10   | -0.00076 | 2.91E-09 | decreasing     | 0          |
| <i>USP46</i>  | Caudate | 5.13E-11   | -0.00071 | 1.76E-07 | decreasing     | 0          |
| <i>USP5</i>   | Caudate | 1.71E-08   | 0.000314 | 0.036974 | other          | 0          |
| <i>USP53</i>  | Caudate | 2.57E-10   | -0.00055 | 8.64E-05 | decreasing     | 0          |
| <i>USP54</i>  | Caudate | 5.40E-12   | 0.000839 | 2.79E-11 | increasing     | 0          |
| <i>USP8</i>   | Caudate | 1.72E-07   | -0.00043 | 0.003282 | other          | 0          |
| <i>VAMP1</i>  | Caudate | 2.60E-07   | 0.000526 | 0.000197 | other          | 1          |
| <i>VAMP4</i>  | Caudate | 1.58E-07   | -0.0006  | 1.59E-05 | decreasing     | 0          |
| <i>VAPB</i>   | Caudate | 2.52E-08   | -0.0005  | 0.000582 | other          | 0          |
| <i>VAR5</i>   | Caudate | 3.54E-13   | 0.000289 | 0.052095 | other          | 0          |
| <i>VAR52</i>  | Caudate | 4.64E-09   | 0.000268 | 0.068718 | other          | 0          |
| <i>VAT1</i>   | Caudate | 3.10E-11   | 0.000309 | 0.035819 | other          | 0          |
| <i>VAT1L</i>  | Caudate | 2.21E-09   | 0.000113 | 0.44563  | other          | 0          |
| <i>VCAN</i>   | Caudate | 8.07E-11   | -0.0006  | 1.76E-05 | decreasing     | 0          |
| <i>VCPIP1</i> | Caudate | 2.09E-07   | -0.00032 | 0.024837 | other          | 0          |
| <i>VDAC1</i>  | Caudate | 1.11E-10   | -0.00071 | 1.25E-07 | decreasing     | 0          |
| <i>VEGFB</i>  | Caudate | 8.08E-10   | 0.000379 | 0.008573 | other          | 0          |
| <i>VEPH1</i>  | Caudate | 2.07E-08   | -0.00079 | 3.22E-10 | decreasing     | 0          |
| <i>VEZT</i>   | Caudate | 1.62E-08   | -0.00076 | 5.17E-09 | decreasing     | 0          |
| <i>VIPR2</i>  | Caudate | 2.73E-07   | 0.000768 | 8.58E-09 | increasing     | 1          |
| <i>VPS13A</i> | Caudate | 3.83E-08   | -0.00037 | 0.013161 | other          | 0          |
| <i>VPS16</i>  | Caudate | 7.95E-11   | 0.000227 | 0.12262  | other          | 0          |

**Supplementary Table 9. Genes with a significant age effect from either ANOVA or linear regression. Beta is the regression coefficient, Pval is the p-value for the regression coefficient of expression on age (in days). Effect category is increasing if beta is positive and significant, decreasing if beta is negative and significant, and other if the ANOVA were significant rather than the linear regression. Local eQTL is 1 if the gene had a significant local eQTL**

| Gene           | Tissue  | Anova.pval | Beta     | Pval     | EffectCategory | Local eQTL |
|----------------|---------|------------|----------|----------|----------------|------------|
| <i>VPS18</i>   | Caudate | 2.03E-08   | 0.000481 | 0.001015 | other          | 0          |
| <i>VPS26A</i>  | Caudate | 4.04E-08   | -0.00047 | 0.001331 | other          | 1          |
| <i>VPS26B</i>  | Caudate | 3.47E-11   | 0.000332 | 0.026986 | other          | 0          |
| <i>VPS28</i>   | Caudate | 2.83E-08   | 0.000424 | 0.003888 | other          | 0          |
| <i>VPS37A</i>  | Caudate | 1.63E-08   | -0.00073 | 6.30E-08 | decreasing     | 0          |
| <i>VPS37D</i>  | Caudate | 2.29E-07   | 0.000487 | 0.000753 | other          | 0          |
| <i>VPS4A</i>   | Caudate | 1.05E-11   | 0.000344 | 0.021142 | other          | 0          |
| <i>VPS51</i>   | Caudate | 1.01E-10   | 0.000362 | 0.013911 | other          | 0          |
| <i>VPS9D1</i>  | Caudate | 2.91E-09   | 0.000579 | 4.55E-05 | increasing     | 0          |
| <i>VSNL1</i>   | Caudate | 1.81E-10   | -0.00066 | 9.65E-07 | decreasing     | 1          |
| <i>VSTM2A</i>  | Caudate | 3.41E-14   | -0.00077 | 1.87E-09 | decreasing     | 0          |
| <i>VSTM2B</i>  | Caudate | 1.50E-19   | 0.0009   | 1.06E-13 | increasing     | 0          |
| <i>VWA1</i>    | Caudate | 1.50E-11   | 0.000594 | 2.95E-05 | increasing     | 0          |
| <i>VWF</i>     | Caudate | 1.36E-09   | 0.000728 | 1.16E-08 | increasing     | 0          |
| <i>WAC</i>     | Caudate | 3.20E-12   | -0.00034 | 0.019778 | other          | 0          |
| <i>WASH1</i>   | Caudate | 1.37E-07   | 0.000415 | 0.005152 | other          | 0          |
| <i>WASL</i>    | Caudate | 1.36E-08   | -0.00032 | 0.028838 | other          | 0          |
| <i>WBP2</i>    | Caudate | 2.06E-10   | 0.000498 | 0.000333 | other          | 0          |
| <i>WBP5</i>    | Caudate | 5.13E-09   | -0.00052 | 0.000325 | other          | 0          |
| <i>WBSCR16</i> | Caudate | 1.47E-07   | 0.000429 | 0.003672 | other          | 0          |
| <i>WDR1</i>    | Caudate | 1.17E-08   | -0.00022 | 0.136223 | other          | 0          |
| <i>WDR12</i>   | Caudate | 1.87E-07   | -0.00073 | 5.06E-08 | decreasing     | 0          |
| <i>WDR13</i>   | Caudate | 4.65E-10   | 0.000443 | 0.002683 | other          | 0          |
| <i>WDR18</i>   | Caudate | 8.35E-09   | 0.000102 | 0.50389  | other          | 0          |
| <i>WDR24</i>   | Caudate | 3.58E-11   | 0.000442 | 0.002558 | other          | 0          |
| <i>WDR34</i>   | Caudate | 2.41E-11   | 0.000294 | 0.041247 | other          | 0          |
| <i>WDR4</i>    | Caudate | 7.35E-06   | 0.000695 | 2.04E-07 | increasing     | 0          |
| <i>WDR6</i>    | Caudate | 2.35E-12   | 0.000228 | 0.121278 | other          | 0          |
| <i>WDR74</i>   | Caudate | 1.41E-07   | 0.000157 | 0.290081 | other          | 0          |
| <i>WDR81</i>   | Caudate | 7.36E-12   | 0.000442 | 0.002678 | other          | 0          |
| <i>WDR91</i>   | Caudate | 9.06E-09   | 0.000742 | 3.63E-08 | increasing     | 0          |
| <i>WDSUB1</i>  | Caudate | 2.02E-07   | 0.000556 | 8.30E-05 | increasing     | 0          |
| <i>WDTC1</i>   | Caudate | 1.79E-07   | 0.000733 | 8.62E-09 | increasing     | 0          |
| <i>WFS1</i>    | Caudate | 3.73E-12   | 0.000833 | 4.00E-11 | increasing     | 0          |
| <i>WIF1</i>    | Caudate | 8.74E-09   | -0.00023 | 0.128637 | other          | 0          |
| <i>WNK3</i>    | Caudate | 4.82E-08   | -0.00039 | 0.007341 | other          | 0          |
| <i>WNT1</i>    | Caudate | 1.36E-08   | 0.000641 | 4.87E-06 | increasing     | 0          |
| <i>WNT10B</i>  | Caudate | 8.56E-09   | 0.000668 | 1.57E-06 | increasing     | 0          |
| <i>WNT11</i>   | Caudate | 2.46E-06   | 0.000741 | 4.01E-08 | increasing     | 0          |
| <i>WNT16</i>   | Caudate | 2.06E-11   | -0.00078 | 3.30E-09 | decreasing     | 0          |

**Supplementary Table 9. Genes with a significant age effect from either ANOVA or linear regression. Beta is the regression coefficient, Pval is the p-value for the regression coefficient of expression on age (in days). Effect category is increasing if beta is positive and significant, decreasing if beta is negative and significant, and other if the ANOVA were significant rather than the linear regression. Local eQTL is 1 if the gene had a significant local eQTL**

| Gene           | Tissue  | Anova.pval | Beta     | Pval     | EffectCategory | Local eQTL |
|----------------|---------|------------|----------|----------|----------------|------------|
| <i>WNT5B</i>   | Caudate | 6.80E-13   | -0.00071 | 7.35E-08 | decreasing     | 0          |
| <i>WNT6</i>    | Caudate | 1.09E-10   | 0.000573 | 2.46E-05 | increasing     | 0          |
| <i>WRN</i>     | Caudate | 3.39E-07   | -0.00071 | 1.28E-07 | decreasing     | 1          |
| <i>WRNIP1</i>  | Caudate | 3.92E-08   | 0.000273 | 0.068821 | other          | 0          |
| <i>WSB2</i>    | Caudate | 2.39E-10   | -0.00075 | 1.04E-08 | decreasing     | 0          |
| <i>WWP1</i>    | Caudate | 9.08E-09   | -0.00054 | 0.000128 | other          | 0          |
| <i>WWP2</i>    | Caudate | 5.02E-09   | 0.000787 | 9.61E-10 | increasing     | 0          |
| <i>XAB2</i>    | Caudate | 2.43E-08   | 0.000658 | 2.42E-06 | increasing     | 0          |
| <i>XKR4</i>    | Caudate | 6.05E-13   | -0.0001  | 0.500679 | other          | 0          |
| <i>XPC</i>     | Caudate | 3.66E-08   | 0.000699 | 3.19E-07 | increasing     | 0          |
| <i>XPNPEP1</i> | Caudate | 1.37E-07   | -0.00042 | 0.004316 | other          | 0          |
| <i>XPO6</i>    | Caudate | 1.25E-10   | 0.000494 | 0.000522 | other          | 0          |
| <i>XPOT</i>    | Caudate | 5.30E-08   | -0.00072 | 5.92E-08 | decreasing     | 0          |
| <i>XPR1</i>    | Caudate | 4.70E-18   | -0.0009  | 3.84E-14 | decreasing     | 0          |
| <i>XRN2</i>    | Caudate | 2.01E-08   | -0.00072 | 4.31E-08 | decreasing     | 0          |
| <i>XXYLT1</i>  | Caudate | 1.24E-08   | 0.000156 | 0.290839 | other          | 1          |
| <i>XYLT2</i>   | Caudate | 1.85E-11   | 0.000721 | 1.17E-07 | increasing     | 0          |
| <i>YBX1</i>    | Caudate | 4.44E-08   | -0.00042 | 0.003875 | other          | 0          |
| <i>YDJC</i>    | Caudate | 9.61E-09   | 0.000482 | 0.000985 | other          | 0          |
| <i>YES1</i>    | Caudate | 5.93E-10   | -0.00081 | 2.17E-10 | decreasing     | 0          |
| <i>YIF1B</i>   | Caudate | 1.28E-08   | -0.00028 | 0.055403 | other          | 0          |
| <i>YIPF4</i>   | Caudate | 4.45E-10   | -0.00075 | 2.89E-08 | decreasing     | 0          |
| <i>YPEL1</i>   | Caudate | 3.66E-09   | 0.000102 | 0.497153 | other          | 0          |
| <i>YPEL3</i>   | Caudate | 1.14E-14   | 0.000862 | 2.25E-12 | increasing     | 0          |
| <i>YTHDC2</i>  | Caudate | 6.32E-09   | -0.00056 | 6.94E-05 | decreasing     | 0          |
| <i>YTHDF3</i>  | Caudate | 2.09E-10   | -0.00066 | 1.59E-06 | decreasing     | 0          |
| <i>YWHAE</i>   | Caudate | 1.51E-08   | -0.00046 | 0.00192  | other          | 0          |
| <i>YWHAG</i>   | Caudate | 2.55E-07   | -0.00019 | 0.182491 | other          | 0          |
| <i>YWHAZ</i>   | Caudate | 6.70E-08   | -0.00071 | 1.67E-07 | decreasing     | 0          |
| <i>ZBTB12</i>  | Caudate | 5.39E-08   | 0.000697 | 2.92E-07 | increasing     | 0          |
| <i>ZBTB16</i>  | Caudate | 8.53E-07   | 0.000732 | 4.59E-08 | increasing     | 0          |
| <i>ZBTB17</i>  | Caudate | 2.63E-09   | 0.000295 | 0.049886 | other          | 0          |
| <i>ZBTB21</i>  | Caudate | 7.42E-12   | -0.00058 | 4.95E-05 | decreasing     | 0          |
| <i>ZBTB41</i>  | Caudate | 4.88E-09   | -0.00076 | 3.55E-09 | decreasing     | 0          |
| <i>ZBTB44</i>  | Caudate | 2.68E-08   | 0.000763 | 2.26E-09 | increasing     | 0          |
| <i>ZBTB46</i>  | Caudate | 1.85E-15   | 0.000768 | 1.58E-09 | increasing     | 0          |
| <i>ZBTB47</i>  | Caudate | 8.21E-10   | 0.000682 | 7.34E-07 | increasing     | 0          |
| <i>ZBTB8A</i>  | Caudate | 2.37E-09   | -0.00035 | 0.014468 | other          | 0          |
| <i>ZC2HC1A</i> | Caudate | 4.30E-12   | -0.00044 | 0.002911 | other          | 0          |
| <i>ZC3H11A</i> | Caudate | 1.41E-07   | -0.00036 | 0.016449 | other          | 0          |



**Supplementary Table 9. Genes with a significant age effect from either ANOVA or linear regression. Beta is the regression coefficient, Pval is the p-value for the regression coefficient of expression on age (in days). Effect category is increasing if beta is positive and significant, decreasing if beta is negative and significant, and other if the ANOVA were significant rather than the linear regression. Local eQTL is 1 if the gene had a significant local eQTL**

| Gene    | Tissue  | Anova.pval | Beta      | Pval     | EffectCategory | Local eQTL |
|---------|---------|------------|-----------|----------|----------------|------------|
| ZC3H12C | Caudate | 8.03E-07   | -0.00077  | 6.94E-09 | decreasing     | 0          |
| ZC3H14  | Caudate | 1.26E-07   | -0.00053  | 0.000264 | other          | 0          |
| ZC4H2   | Caudate | 1.09E-08   | -0.00057  | 5.70E-05 | decreasing     | 0          |
| ZCCHC10 | Caudate | 1.88E-11   | -0.00057  | 6.43E-05 | decreasing     | 0          |
| ZCCHC16 | Caudate | 9.06E-08   | -0.00047  | 0.001079 | other          | 0          |
| ZCCHC24 | Caudate | 2.17E-08   | 0.000705  | 2.41E-07 | increasing     | 0          |
| ZCCHC7  | Caudate | 7.91E-08   | -8.19E-05 | 0.589128 | other          | 0          |
| ZCWPW1  | Caudate | 3.94E-08   | 0.000747  | 1.23E-08 | increasing     | 0          |
| ZDHHC1  | Caudate | 2.01E-07   | 0.000656  | 1.81E-06 | increasing     | 0          |
| ZDHHC2  | Caudate | 3.87E-16   | -0.0009   | 6.39E-14 | decreasing     | 0          |
| ZDHHC24 | Caudate | 1.08E-09   | 0.000538  | 0.000199 | other          | 0          |
| ZEB1    | Caudate | 1.01E-11   | -0.00075  | 2.62E-08 | decreasing     | 0          |
| ZEB2    | Caudate | 1.28E-08   | 0.000618  | 5.34E-06 | increasing     | 0          |
| ZFP37   | Caudate | 4.14E-15   | -0.0008   | 5.68E-10 | decreasing     | 0          |
| ZFP62   | Caudate | 1.16E-10   | 0.000762  | 1.23E-08 | increasing     | 0          |
| ZFPL1   | Caudate | 8.72E-08   | 0.000512  | 0.000374 | other          | 0          |
| ZFPM1   | Caudate | 6.45E-10   | 0.000662  | 1.47E-06 | increasing     | 0          |
| ZFYVE20 | Caudate | 1.64E-08   | 0.000743  | 3.63E-08 | increasing     | 0          |
| ZFYVE26 | Caudate | 7.36E-07   | 0.000727  | 7.23E-08 | increasing     | 0          |
| ZFYVE28 | Caudate | 6.35E-08   | 0.000654  | 1.90E-06 | increasing     | 0          |
| ZG16B   | Caudate | 1.47E-12   | 0.000808  | 2.50E-10 | increasing     | 0          |
| ZGPAT   | Caudate | 1.03E-10   | 0.00061   | 1.64E-05 | increasing     | 0          |
| ZIC3    | Caudate | 8.65E-09   | -0.00073  | 5.73E-08 | decreasing     | 0          |
| ZKSCAN7 | Caudate | 4.08E-09   | -0.00038  | 0.007918 | other          | 0          |
| ZMAT3   | Caudate | 2.07E-09   | -0.00029  | 0.043773 | other          | 0          |
| ZMYM2   | Caudate | 5.16E-08   | -0.00076  | 1.18E-08 | decreasing     | 0          |
| ZMYM4   | Caudate | 6.23E-09   | -0.00064  | 4.54E-06 | decreasing     | 0          |
| ZMYND11 | Caudate | 5.12E-05   | -0.0007   | 2.26E-07 | decreasing     | 0          |
| ZNF12   | Caudate | 3.42E-08   | -0.00068  | 9.49E-07 | decreasing     | 0          |
| ZNF140  | Caudate | 3.51E-10   | -0.00077  | 4.68E-09 | decreasing     | 0          |
| ZNF177  | Caudate | 1.12E-08   | -0.00066  | 6.05E-07 | decreasing     | 0          |
| ZNF205  | Caudate | 2.56E-07   | 0.00033   | 0.02824  | other          | 0          |
| ZNF213  | Caudate | 4.11E-09   | 0.000479  | 0.001033 | other          | 0          |
| ZNF263  | Caudate | 2.60E-07   | 0.000274  | 0.068658 | other          | 0          |
| ZNF266  | Caudate | 4.00E-08   | -0.0004   | 0.00607  | other          | 0          |
| ZNF276  | Caudate | 2.23E-10   | 0.000514  | 0.000304 | other          | 0          |
| ZNF282  | Caudate | 1.75E-13   | 0.000294  | 0.045726 | other          | 0          |
| ZNF283  | Caudate | 1.68E-09   | -0.00073  | 4.54E-08 | decreasing     | 1          |
| ZNF292  | Caudate | 2.06E-08   | -0.00062  | 8.51E-06 | decreasing     | 0          |
| ZNF300  | Caudate | 2.57E-09   | -0.00069  | 2.20E-07 | decreasing     | 1          |

**Supplementary Table 9. Genes with a significant age effect from either ANOVA or linear regression. Beta is the regression coefficient, Pval is the p-value for the regression coefficient of expression on age (in days). Effect category is increasing if beta is positive and significant, decreasing if beta is negative and significant, and other if the ANOVA were significant rather than the linear regression. Local eQTL is 1 if the gene had a significant local eQTL**

| Gene    | Tissue  | Anova.pval | Beta      | Pval     | EffectCategory | Local eQTL |
|---------|---------|------------|-----------|----------|----------------|------------|
| ZNF316  | Caudate | 2.61E-09   | 0.00059   | 3.35E-05 | increasing     | 0          |
| ZNF317  | Caudate | 1.73E-08   | 0.000127  | 0.396911 | other          | 0          |
| ZNF326  | Caudate | 4.08E-10   | -0.00042  | 0.005011 | other          | 0          |
| ZNF335  | Caudate | 3.68E-08   | 0.0005    | 0.000304 | other          | 0          |
| ZNF385B | Caudate | 5.18E-08   | -8.68E-05 | 0.553685 | other          | 0          |
| ZNF395  | Caudate | 4.72E-07   | 0.000762  | 8.16E-09 | increasing     | 0          |
| ZNF41   | Caudate | 3.63E-07   | -0.00073  | 6.09E-08 | decreasing     | 0          |
| ZNF428  | Caudate | 2.40E-09   | 5.32E-05  | 0.725117 | other          | 0          |
| ZNF446  | Caudate | 3.32E-09   | 0.000491  | 0.000739 | other          | 0          |
| ZNF48   | Caudate | 3.17E-09   | 7.86E-05  | 0.603474 | other          | 0          |
| ZNF483  | Caudate | 5.23E-10   | 0.000605  | 1.19E-05 | increasing     | 0          |
| ZNF496  | Caudate | 1.36E-09   | 0.000253  | 0.084763 | other          | 0          |
| ZNF497  | Caudate | 6.38E-10   | 0.000221  | 0.132978 | other          | 0          |
| ZNF500  | Caudate | 5.00E-10   | 0.000503  | 0.000471 | other          | 0          |
| ZNF512B | Caudate | 2.16E-12   | 0.000195  | 0.194344 | other          | 0          |
| ZNF517  | Caudate | 9.31E-09   | 0.000331  | 0.023506 | other          | 1          |
| ZNF518A | Caudate | 1.24E-08   | -0.00073  | 2.95E-08 | decreasing     | 0          |
| ZNF521  | Caudate | 6.10E-13   | -0.00077  | 3.52E-09 | decreasing     | 0          |
| ZNF526  | Caudate | 3.82E-06   | 0.000718  | 1.43E-07 | increasing     | 0          |
| ZNF528  | Caudate | 5.07E-09   | -0.00076  | 1.45E-09 | decreasing     | 0          |
| ZNF536  | Caudate | 9.37E-14   | 0.000819  | 1.36E-11 | increasing     | 0          |
| ZNF558  | Caudate | 2.69E-11   | -0.00057  | 3.99E-05 | decreasing     | 0          |
| ZNF565  | Caudate | 1.86E-08   | 0.000796  | 1.32E-09 | increasing     | 0          |
| ZNF566  | Caudate | 2.91E-08   | -0.00042  | 0.004156 | other          | 0          |
| ZNF569  | Caudate | 1.27E-09   | -0.00075  | 9.53E-09 | decreasing     | 0          |
| ZNF570  | Caudate | 1.97E-08   | -0.00055  | 6.79E-05 | decreasing     | 0          |
| ZNF598  | Caudate | 6.43E-12   | 0.000748  | 2.75E-08 | increasing     | 0          |
| ZNF623  | Caudate | 1.55E-07   | 0.000222  | 0.142286 | other          | 0          |
| ZNF627  | Caudate | 1.18E-07   | -0.00044  | 0.002273 | other          | 0          |
| ZNF629  | Caudate | 2.06E-08   | 4.55E-06  | 0.975974 | other          | 0          |
| ZNF641  | Caudate | 2.12E-07   | -0.00056  | 7.55E-05 | decreasing     | 0          |
| ZNF644  | Caudate | 5.24E-09   | -0.00078  | 1.59E-09 | decreasing     | 0          |
| ZNF646  | Caudate | 2.57E-08   | 0.000538  | 0.000142 | other          | 0          |
| ZNF668  | Caudate | 1.51E-08   | 0.000378  | 0.010817 | other          | 0          |
| ZNF672  | Caudate | 8.38E-08   | 0.000312  | 0.036138 | other          | 0          |
| ZNF680  | Caudate | 2.77E-08   | -0.00075  | 1.11E-08 | decreasing     | 0          |
| ZNF682  | Caudate | 1.25E-08   | -0.00073  | 2.16E-08 | decreasing     | 0          |
| ZNF687  | Caudate | 6.38E-07   | 0.000726  | 8.35E-08 | increasing     | 0          |
| ZNF691  | Caudate | 2.22E-07   | 0.000442  | 0.002647 | other          | 0          |
| ZNF696  | Caudate | 9.14E-09   | 0.000621  | 1.04E-05 | increasing     | 1          |

**Supplementary Table 9. Genes with a significant age effect from either ANOVA or linear regression. Beta is the regression coefficient, Pval is the p-value for the regression coefficient of expression on age (in days). Effect category is increasing if beta is positive and significant, decreasing if beta is negative and significant, and other if the ANOVA were significant rather than the linear regression. Local eQTL is 1 if the gene had a significant local eQTL**

| Gene       | Tissue     | Anova.pval | Beta      | Pval     | EffectCategory | Local eQTL |
|------------|------------|------------|-----------|----------|----------------|------------|
| ZNF706     | Caudate    | 4.52E-11   | -0.00034  | 0.021384 | other          | 0          |
| ZNF709     | Caudate    | 3.55E-08   | -0.00062  | 3.95E-06 | decreasing     | 0          |
| ZNF710     | Caudate    | 3.60E-09   | 0.000297  | 0.047961 | other          | 0          |
| ZNF711     | Caudate    | 2.28E-08   | -0.00073  | 3.04E-08 | decreasing     | 0          |
| ZNF721     | Caudate    | 2.26E-10   | -0.00072  | 6.89E-08 | decreasing     | 0          |
| ZNF74      | Caudate    | 1.19E-08   | 0.000184  | 0.212765 | other          | 0          |
| ZNF740     | Caudate    | 2.16E-10   | 0.000206  | 0.162823 | other          | 0          |
| ZNF746     | Caudate    | 3.01E-10   | 0.000583  | 4.29E-05 | increasing     | 0          |
| ZNF76      | Caudate    | 3.92E-08   | 0.000476  | 0.001187 | other          | 0          |
| ZNF771     | Caudate    | 2.49E-09   | 0.000462  | 0.001646 | other          | 0          |
| ZNF775     | Caudate    | 2.01E-10   | 0.000643  | 4.28E-06 | increasing     | 0          |
| ZNF787     | Caudate    | 1.66E-10   | 0.000521  | 0.000329 | other          | 0          |
| ZNF79      | Caudate    | 1.71E-07   | 0.000684  | 7.42E-07 | increasing     | 0          |
| ZNF800     | Caudate    | 1.35E-09   | -0.00026  | 0.074338 | other          | 0          |
| ZNF804B    | Caudate    | 3.07E-14   | -0.00081  | 3.41E-10 | decreasing     | 0          |
| ZNF821     | Caudate    | 1.13E-08   | 0.000115  | 0.442449 | other          | 0          |
| ZNF835     | Caudate    | 5.07E-08   | 0.000507  | 0.000394 | other          | 0          |
| ZNF853     | Caudate    | 3.04E-11   | 0.000252  | 0.09201  | other          | 0          |
| ZNF883     | Caudate    | 3.68E-10   | -0.00079  | 5.55E-10 | decreasing     | 0          |
| ZNF888     | Caudate    | 2.55E-07   | -0.00033  | 0.023208 | other          | 0          |
| ZNHIT1     | Caudate    | 3.62E-08   | 0.000355  | 0.017715 | other          | 0          |
| ZNHIT2     | Caudate    | 8.18E-10   | 0.000221  | 0.139168 | other          | 0          |
| ZPLD1      | Caudate    | 5.75E-09   | -0.00073  | 2.95E-08 | decreasing     | 0          |
| ZSCAN25    | Caudate    | 1.49E-07   | 0.000296  | 0.048143 | other          | 0          |
| ZSWIM6     | Caudate    | 1.50E-15   | -0.00082  | 1.76E-10 | decreasing     | 0          |
| ZSWIM8     | Caudate    | 5.71E-11   | 0.000649  | 2.97E-06 | increasing     | 0          |
| ZXDC       | Caudate    | 6.47E-08   | 0.000439  | 0.002245 | other          | 0          |
| ZYG11B     | Caudate    | 3.70E-09   | -0.00072  | 7.86E-08 | decreasing     | 0          |
| ZYX        | Caudate    | 5.24E-09   | 0.000622  | 7.91E-06 | increasing     | 0          |
| ALAS2      | Fibroblast | 3.19E-08   | 0.000355  | 0.005256 | other          | 0          |
| ARID3A     | Fibroblast | 9.27E-09   | -0.00026  | 0.083927 | other          | 0          |
| C6H19orf52 | Fibroblast | 1.68E-07   | 0.000217  | 0.15343  | other          | 0          |
| CDH10      | Fibroblast | 1.08E-07   | -0.00049  | 0.000505 | other          | 0          |
| CDK19      | Fibroblast | 3.68E-09   | -0.00022  | 0.136052 | other          | 0          |
| CPNE3      | Fibroblast | 6.72E-08   | -5.81E-05 | 0.697382 | other          | 0          |
| EBF3       | Fibroblast | 1.47E-09   | -0.00059  | 2.58E-05 | decreasing     | 0          |
| ELAC1      | Fibroblast | 1.85E-07   | 0.000219  | 0.143263 | other          | 0          |
| FAM173A    | Fibroblast | 2.72E-08   | 0.000351  | 0.019149 | other          | 0          |
| FER        | Fibroblast | 1.90E-07   | -0.00024  | 0.101076 | other          | 0          |
| GPC6       | Fibroblast | 2.22E-07   | -0.00049  | 0.000773 | other          | 0          |

**Supplementary Table 9. Genes with a significant age effect from either ANOVA or linear regression. Beta is the regression coefficient, Pval is the p-value for the regression coefficient of expression on age (in days). Effect category is increasing if beta is positive and significant, decreasing if beta is negative and significant, and other if the ANOVA were significant rather than the linear regression. Local eQTL is 1 if the gene had a significant local eQTL**

| Gene                | Tissue     | Anova.pval | Beta      | Pval     | EffectCategory | Local eQTL |
|---------------------|------------|------------|-----------|----------|----------------|------------|
| <i>KRT10</i>        | Fibroblast | 2.44E-07   | 0.000304  | 0.042895 | other          | 0          |
| <i>LOC103214331</i> | Fibroblast | 3.90E-08   | -0.0002   | 0.186877 | other          | 0          |
| <i>LOC103214661</i> | Fibroblast | 1.51E-08   | -5.01E-05 | 0.744469 | other          | 0          |
| <i>LOC103214700</i> | Fibroblast | 2.48E-08   | -4.68E-05 | 0.722357 | other          | 0          |
| <i>LOC103218257</i> | Fibroblast | 1.47E-07   | -0.00031  | 0.04008  | other          | 0          |
| <i>LOC103220999</i> | Fibroblast | 3.37E-08   | 0.000164  | 0.180218 | other          | 0          |
| <i>LOC103221358</i> | Fibroblast | 1.47E-07   | -0.00016  | 0.234354 | other          | 0          |
| <i>LOC103221731</i> | Fibroblast | 1.69E-07   | -3.61E-05 | 0.81165  | other          | 0          |
| <i>LOC103222287</i> | Fibroblast | 1.93E-08   | 0.000441  | 0.002225 | other          | 0          |
| <i>LOC103222891</i> | Fibroblast | 1.45E-07   | -0.00025  | 0.09634  | other          | 0          |
| <i>LOC103224472</i> | Fibroblast | 2.23E-08   | -0.00019  | 0.203822 | other          | 0          |
| <i>LOC103224638</i> | Fibroblast | 1.86E-07   | -0.00023  | 0.135438 | other          | 0          |
| <i>LOC103225092</i> | Fibroblast | 2.36E-07   | 4.05E-05  | 0.790973 | other          | 0          |
| <i>LOC103225256</i> | Fibroblast | 1.03E-07   | 5.39E-05  | 0.723859 | other          | 0          |
| <i>LOC103225416</i> | Fibroblast | 1.18E-07   | -0.00012  | 0.448523 | other          | 0          |
| <i>LOC103225891</i> | Fibroblast | 6.03E-08   | -4.17E-06 | 0.978324 | other          | 0          |
| <i>LOC103226410</i> | Fibroblast | 3.36E-08   | 0.000166  | 0.278539 | other          | 0          |
| <i>LOC103227129</i> | Fibroblast | 5.68E-08   | -5.58E-05 | 0.713055 | other          | 0          |
| <i>LOC103227227</i> | Fibroblast | 4.17E-08   | -0.00011  | 0.480189 | other          | 0          |
| <i>LOC103227336</i> | Fibroblast | 7.84E-08   | -0.00035  | 0.018757 | other          | 0          |
| <i>LOC103229008</i> | Fibroblast | 7.17E-08   | -0.00026  | 0.083738 | other          | 0          |
| <i>LOC103230997</i> | Fibroblast | 2.53E-07   | -0.00012  | 0.420695 | other          | 0          |
| <i>LOC103231822</i> | Fibroblast | 6.15E-08   | -0.00035  | 0.018266 | other          | 0          |
| <i>LOC103231835</i> | Fibroblast | 7.84E-09   | -0.00036  | 0.015657 | other          | 0          |
| <i>LOC103231865</i> | Fibroblast | 1.03E-07   | 6.93E-05  | 0.600669 | other          | 0          |
| <i>LOC103232066</i> | Fibroblast | 1.07E-07   | -0.00011  | 0.466253 | other          | 0          |
| <i>LOC103232079</i> | Fibroblast | 9.82E-08   | -7.35E-05 | 0.632111 | other          | 0          |
| <i>LOC103232122</i> | Fibroblast | 6.10E-09   | -0.00027  | 0.074128 | other          | 0          |
| <i>LOC103232333</i> | Fibroblast | 1.09E-07   | -0.00022  | 0.156932 | other          | 0          |
| <i>LOC103232529</i> | Fibroblast | 1.91E-07   | -9.15E-05 | 0.550591 | other          | 0          |
| <i>LOC103232530</i> | Fibroblast | 1.63E-07   | -8.41E-05 | 0.573586 | other          | 0          |
| <i>LOC103232946</i> | Fibroblast | 2.08E-07   | -0.00015  | 0.328686 | other          | 0          |
| <i>LOC103232961</i> | Fibroblast | 1.38E-07   | -0.00023  | 0.136092 | other          | 0          |
| <i>LOC103234293</i> | Fibroblast | 8.94E-08   | -0.00022  | 0.145375 | other          | 0          |
| <i>LOC103234898</i> | Fibroblast | 1.50E-07   | -0.0004   | 0.00664  | other          | 0          |
| <i>LOC103236406</i> | Fibroblast | 2.52E-08   | -0.00016  | 0.286022 | other          | 0          |
| <i>LOC103236458</i> | Fibroblast | 1.94E-07   | -0.00015  | 0.332044 | other          | 0          |
| <i>LOC103236696</i> | Fibroblast | 1.82E-07   | -0.00016  | 0.304473 | other          | 0          |
| <i>LOC103237688</i> | Fibroblast | 1.62E-08   | -0.00029  | 0.053866 | other          | 0          |
| <i>LOC103238094</i> | Fibroblast | 2.26E-07   | -8.34E-05 | 0.58654  | other          | 0          |

**Supplementary Table 9. Genes with a significant age effect from either ANOVA or linear regression. Beta is the regression coefficient, Pval is the p-value for the regression coefficient of expression on age (in days). Effect category is increasing if beta is positive and significant, decreasing if beta is negative and significant, and other if the ANOVA were significant rather than the linear regression. Local eQTL is 1 if the gene had a significant local eQTL**

| Gene                | Tissue      | Anova.pval | Beta      | Pval     | EffectCategory | Local eQTL |
|---------------------|-------------|------------|-----------|----------|----------------|------------|
| <i>LOC103238464</i> | Fibroblast  | 1.85E-09   | 1.17E-06  | 0.993617 | other          | 0          |
| <i>LOC103239503</i> | Fibroblast  | 3.96E-08   | -6.94E-05 | 0.643512 | other          | 0          |
| <i>LOC103239517</i> | Fibroblast  | 2.14E-07   | -0.00014  | 0.34388  | other          | 0          |
| <i>LOC103240032</i> | Fibroblast  | 1.23E-07   | 0.000151  | 0.278815 | other          | 0          |
| <i>LOC103240114</i> | Fibroblast  | 6.60E-08   | -0.00012  | 0.410395 | other          | 0          |
| <i>LOC103240394</i> | Fibroblast  | 1.34E-07   | 0.000104  | 0.477606 | other          | 0          |
| <i>LOC103241006</i> | Fibroblast  | 1.24E-07   | -6.68E-05 | 0.65288  | other          | 0          |
| <i>LOC103241328</i> | Fibroblast  | 2.14E-08   | -7.96E-05 | 0.594518 | other          | 0          |
| <i>LOC103241507</i> | Fibroblast  | 2.13E-08   | -0.00022  | 0.146026 | other          | 0          |
| <i>LOC103241784</i> | Fibroblast  | 2.59E-08   | -0.00016  | 0.305373 | other          | 0          |
| <i>LOC103242353</i> | Fibroblast  | 6.45E-09   | 0.000179  | 0.237463 | other          | 0          |
| <i>LOC103243126</i> | Fibroblast  | 4.13E-08   | -0.0001   | 0.499007 | other          | 0          |
| <i>LOC103244321</i> | Fibroblast  | 1.86E-07   | -0.00017  | 0.276751 | other          | 0          |
| <i>LOC103247904</i> | Fibroblast  | 5.97E-10   | -7.86E-05 | 0.520463 | other          | 0          |
| <i>LOC103248166</i> | Fibroblast  | 6.52E-08   | -0.00011  | 0.467286 | other          | 0          |
| <i>LOC103249061</i> | Fibroblast  | 1.81E-07   | -0.0002   | 0.18101  | other          | 0          |
| <i>MAP2K2</i>       | Fibroblast  | 1.54E-07   | 0.000293  | 0.049596 | other          | 0          |
| <i>MYPOP</i>        | Fibroblast  | 7.41E-09   | -0.00017  | 0.239244 | other          | 0          |
| <i>PXDN</i>         | Fibroblast  | 1.03E-07   | -0.00068  | 9.29E-07 | decreasing     | 0          |
| <i>REPS2</i>        | Fibroblast  | 1.49E-09   | -0.00044  | 0.002237 | other          | 0          |
| <i>S100A9</i>       | Fibroblast  | 1.22E-08   | -0.00022  | 0.036347 | other          | 0          |
| <i>SLC25A28</i>     | Fibroblast  | 7.89E-08   | 0.00035   | 0.019567 | other          | 0          |
| <i>STUB1</i>        | Fibroblast  | 1.68E-07   | 0.000473  | 0.001208 | other          | 0          |
| <i>TRHDE</i>        | Fibroblast  | 8.93E-08   | -0.00048  | 0.000752 | other          | 0          |
| <i>ZNF280B</i>      | Fibroblast  | 6.12E-08   | -0.00059  | 2.47E-05 | decreasing     | 0          |
| <i>AASS</i>         | Hippocampus | 1.02E-07   | -0.00028  | 0.06595  | other          | 0          |
| <i>ABCA8</i>        | Hippocampus | 5.49E-10   | 0.000697  | 3.17E-07 | increasing     | 0          |
| <i>ACOT11</i>       | Hippocampus | 4.85E-08   | 0.000565  | 7.19E-05 | increasing     | 0          |
| <i>ACSM5</i>        | Hippocampus | 1.74E-07   | 0.000609  | 1.46E-05 | increasing     | 0          |
| <i>ADAMTS18</i>     | Hippocampus | 1.72E-11   | -0.00076  | 1.29E-08 | decreasing     | 0          |
| <i>ADIPOR2</i>      | Hippocampus | 3.95E-08   | 0.000532  | 0.000211 | other          | 0          |
| <i>AIDA</i>         | Hippocampus | 1.23E-07   | -0.00049  | 0.000771 | other          | 0          |
| <i>ALDH1A3</i>      | Hippocampus | 5.52E-07   | 0.000745  | 2.41E-08 | increasing     | 0          |
| <i>ALPL</i>         | Hippocampus | 7.21E-08   | -0.00061  | 1.59E-05 | decreasing     | 0          |
| <i>AMER1</i>        | Hippocampus | 1.24E-07   | -0.00046  | 0.001752 | other          | 0          |
| <i>AMER2</i>        | Hippocampus | 1.53E-07   | 0.000653  | 2.44E-06 | increasing     | 0          |
| <i>ANGEL1</i>       | Hippocampus | 8.78E-09   | 0.000632  | 5.84E-06 | increasing     | 0          |
| <i>ANKRD13C</i>     | Hippocampus | 1.67E-08   | 0.000118  | 0.435334 | other          | 0          |
| <i>ANKRD50</i>      | Hippocampus | 3.81E-09   | -0.00064  | 4.39E-06 | decreasing     | 0          |
| <i>APC</i>          | Hippocampus | 2.82E-08   | -0.0007   | 2.32E-07 | decreasing     | 0          |

**Supplementary Table 9. Genes with a significant age effect from either ANOVA or linear regression. Beta is the regression coefficient, Pval is the p-value for the regression coefficient of expression on age (in days). Effect category is increasing if beta is positive and significant, decreasing if beta is negative and significant, and other if the ANOVA were significant rather than the linear regression. Local eQTL is 1 if the gene had a significant local eQTL**

| Gene              | Tissue      | Anova.pval | Beta     | Pval     | EffectCategory | Local eQTL |
|-------------------|-------------|------------|----------|----------|----------------|------------|
| <i>ARHGEF37</i>   | Hippocampus | 8.28E-08   | 0.00065  | 2.73E-06 | increasing     | 1          |
| <i>ARHGEF38</i>   | Hippocampus | 2.14E-08   | 0.00076  | 9.84E-09 | increasing     | 0          |
| <i>ARL4C</i>      | Hippocampus | 8.94E-08   | -0.00045 | 0.002089 | other          | 0          |
| <i>ASIC2</i>      | Hippocampus | 5.06E-08   | -0.00061 | 1.51E-05 | decreasing     | 0          |
| <i>ASPM</i>       | Hippocampus | 4.99E-08   | -0.00055 | 0.00012  | other          | 0          |
| <i>ATF7IP</i>     | Hippocampus | 1.29E-07   | -0.00042 | 0.004621 | other          | 0          |
| <i>ATG4C</i>      | Hippocampus | 3.99E-08   | 0.000635 | 5.10E-06 | increasing     | 0          |
| <i>ATPAF1</i>     | Hippocampus | 1.39E-08   | 0.000649 | 2.87E-06 | increasing     | 0          |
| <i>B3GNT7</i>     | Hippocampus | 8.86E-08   | -0.00057 | 6.14E-05 | decreasing     | 0          |
| <i>BAMBI</i>      | Hippocampus | 4.59E-10   | -0.00063 | 6.34E-06 | decreasing     | 0          |
| <i>BBX</i>        | Hippocampus | 2.23E-08   | 0.000727 | 6.76E-08 | increasing     | 0          |
| <i>BCAN</i>       | Hippocampus | 2.28E-08   | -0.00061 | 1.40E-05 | decreasing     | 0          |
| <i>BHLHE41</i>    | Hippocampus | 1.31E-08   | 0.000668 | 1.24E-06 | increasing     | 0          |
| <i>BZW2</i>       | Hippocampus | 1.35E-07   | -0.00045 | 0.00226  | other          | 0          |
| <i>C1QTNF1</i>    | Hippocampus | 8.61E-10   | -0.00065 | 3.25E-06 | decreasing     | 0          |
| <i>C9H10orf11</i> | Hippocampus | 5.12E-07   | 0.000719 | 9.92E-08 | increasing     | 0          |
| <i>CALCOCO2</i>   | Hippocampus | 9.04E-09   | 0.000685 | 5.62E-07 | increasing     | 0          |
| <i>CAMKK1</i>     | Hippocampus | 6.45E-09   | 0.000573 | 5.42E-05 | increasing     | 0          |
| <i>CBX7</i>       | Hippocampus | 7.38E-09   | 0.000618 | 1.01E-05 | increasing     | 0          |
| <i>CENPE</i>      | Hippocampus | 1.77E-07   | -0.00014 | 0.366224 | other          | 0          |
| <i>CEP170</i>     | Hippocampus | 9.12E-09   | -0.00036 | 0.01438  | other          | 0          |
| <i>CETP</i>       | Hippocampus | 1.13E-12   | -0.00082 | 1.67E-10 | decreasing     | 0          |
| <i>CHL1</i>       | Hippocampus | 2.61E-07   | -0.00018 | 0.229705 | other          | 0          |
| <i>CLDN11</i>     | Hippocampus | 1.91E-07   | -0.00048 | 0.000864 | other          | 0          |
| <i>CLDND1</i>     | Hippocampus | 1.83E-10   | 0.000816 | 2.41E-10 | increasing     | 0          |
| <i>CLIP4</i>      | Hippocampus | 5.68E-07   | 0.000708 | 1.81E-07 | increasing     | 0          |
| <i>CNDP1</i>      | Hippocampus | 4.35E-12   | 0.000778 | 3.26E-09 | increasing     | 0          |
| <i>COL15A1</i>    | Hippocampus | 9.30E-10   | -0.00077 | 4.29E-09 | decreasing     | 1          |
| <i>COL4A1</i>     | Hippocampus | 3.47E-10   | -0.00073 | 6.97E-08 | decreasing     | 0          |
| <i>COL8A1</i>     | Hippocampus | 3.60E-06   | 0.00072  | 9.71E-08 | increasing     | 0          |
| <i>CPB1</i>       | Hippocampus | 1.69E-20   | 0.000894 | 2.50E-13 | increasing     | 0          |
| <i>CREBRF</i>     | Hippocampus | 1.15E-14   | 0.000857 | 9.04E-12 | increasing     | 0          |
| <i>CRISPLD1</i>   | Hippocampus | 1.85E-09   | -0.00063 | 7.46E-06 | decreasing     | 0          |
| <i>CRYBG3</i>     | Hippocampus | 6.34E-09   | 0.000714 | 1.35E-07 | increasing     | 0          |
| <i>CTNNA3</i>     | Hippocampus | 3.27E-08   | 0.00068  | 7.06E-07 | increasing     | 0          |
| <i>CWF19L2</i>    | Hippocampus | 3.44E-09   | 0.000752 | 1.58E-08 | increasing     | 0          |
| <i>CX3CL1</i>     | Hippocampus | 7.69E-06   | -0.00073 | 6.28E-08 | decreasing     | 0          |
| <i>CXADR</i>      | Hippocampus | 4.86E-10   | -0.00073 | 5.67E-08 | decreasing     | 0          |
| <i>DAB2</i>       | Hippocampus | 8.41E-08   | -0.0005  | 0.000478 | other          | 0          |
| <i>DAG1</i>       | Hippocampus | 6.24E-09   | -0.00072 | 7.66E-08 | decreasing     | 0          |

**Supplementary Table 9. Genes with a significant age effect from either ANOVA or linear regression. Beta is the regression coefficient, Pval is the p-value for the regression coefficient of expression on age (in days). Effect category is increasing if beta is positive and significant, decreasing if beta is negative and significant, and other if the ANOVA were significant rather than the linear regression. Local eQTL is 1 if the gene had a significant local eQTL**

| Gene           | Tissue      | Anova.pval | Beta     | Pval     | EffectCategory | Local eQTL |
|----------------|-------------|------------|----------|----------|----------------|------------|
| <i>DCX</i>     | Hippocampus | 1.06E-10   | -0.0007  | 2.71E-07 | decreasing     | 0          |
| <i>DLGAP5</i>  | Hippocampus | 3.03E-08   | -0.00058 | 2.44E-05 | decreasing     | 0          |
| <i>DMRTA2</i>  | Hippocampus | 2.51E-07   | -0.00058 | 4.54E-05 | decreasing     | 0          |
| <i>DNAJB5</i>  | Hippocampus | 1.12E-10   | -0.00078 | 3.15E-09 | decreasing     | 0          |
| <i>DNER</i>    | Hippocampus | 7.67E-08   | -0.00067 | 1.20E-06 | decreasing     | 0          |
| <i>DOCK5</i>   | Hippocampus | 3.88E-13   | 0.000834 | 6.05E-11 | increasing     | 0          |
| <i>DPYSL3</i>  | Hippocampus | 1.76E-15   | -0.00087 | 2.47E-12 | decreasing     | 0          |
| <i>DRAXIN</i>  | Hippocampus | 1.17E-09   | -0.0005  | 0.000541 | other          | 0          |
| <i>EBF4</i>    | Hippocampus | 4.20E-08   | -0.00054 | 0.00018  | other          | 0          |
| <i>EDIL3</i>   | Hippocampus | 2.47E-07   | 0.000598 | 2.16E-05 | increasing     | 0          |
| <i>EGFR</i>    | Hippocampus | 1.91E-07   | -0.00062 | 1.01E-05 | decreasing     | 0          |
| <i>EMCN</i>    | Hippocampus | 5.03E-09   | -0.00055 | 0.000115 | other          | 0          |
| <i>ENO4</i>    | Hippocampus | 1.26E-07   | 0.00052  | 0.000305 | other          | 0          |
| <i>ENOX1</i>   | Hippocampus | 6.26E-09   | -0.00066 | 1.61E-06 | decreasing     | 0          |
| <i>ENPP6</i>   | Hippocampus | 9.77E-08   | -0.00054 | 0.000149 | other          | 0          |
| <i>ERGIC1</i>  | Hippocampus | 4.12E-08   | -0.00063 | 5.78E-06 | decreasing     | 0          |
| <i>ETS1</i>    | Hippocampus | 9.95E-09   | -0.00064 | 3.58E-06 | decreasing     | 0          |
| <i>EVI2A</i>   | Hippocampus | 1.79E-08   | 0.000604 | 1.75E-05 | increasing     | 0          |
| <i>EZH1</i>    | Hippocampus | 1.61E-10   | 0.000739 | 3.44E-08 | increasing     | 0          |
| <i>FABP7</i>   | Hippocampus | 1.04E-07   | -0.0005  | 0.000524 | other          | 0          |
| <i>FAM110B</i> | Hippocampus | 6.56E-08   | -0.00062 | 1.02E-05 | decreasing     | 0          |
| <i>FAM188A</i> | Hippocampus | 1.15E-07   | 0.000638 | 4.47E-06 | increasing     | 0          |
| <i>FAM81A</i>  | Hippocampus | 1.53E-08   | -0.00038 | 0.00989  | other          | 0          |
| <i>FBXL13</i>  | Hippocampus | 1.17E-06   | 0.000746 | 2.31E-08 | increasing     | 0          |
| <i>FERD3L</i>  | Hippocampus | 3.19E-13   | 0.000813 | 6.35E-11 | increasing     | 0          |
| <i>FGF1</i>    | Hippocampus | 4.35E-08   | 0.000712 | 1.48E-07 | increasing     | 0          |
| <i>FRMD3</i>   | Hippocampus | 2.10E-08   | -0.0006  | 2.00E-05 | decreasing     | 1          |
| <i>FXYP1</i>   | Hippocampus | 6.93E-08   | 0.000369 | 0.012817 | other          | 0          |
| <i>FYN</i>     | Hippocampus | 9.82E-11   | -0.00076 | 1.03E-08 | decreasing     | 0          |
| <i>GALNTL6</i> | Hippocampus | 7.59E-12   | -0.00081 | 5.22E-10 | decreasing     | 0          |
| <i>GAP43</i>   | Hippocampus | 1.75E-07   | -0.00059 | 2.96E-05 | decreasing     | 0          |
| <i>GPC2</i>    | Hippocampus | 2.53E-07   | -0.00061 | 1.48E-05 | decreasing     | 0          |
| <i>GPC5</i>    | Hippocampus | 6.90E-10   | 0.000671 | 1.07E-06 | increasing     | 1          |
| <i>GPNMB</i>   | Hippocampus | 8.77E-09   | 0.00066  | 1.80E-06 | increasing     | 0          |
| <i>GPR143</i>  | Hippocampus | 9.85E-06   | 0.000739 | 2.75E-08 | increasing     | 0          |
| <i>GPR17</i>   | Hippocampus | 7.60E-13   | -0.00076 | 1.16E-08 | decreasing     | 0          |
| <i>GPRASP1</i> | Hippocampus | 1.41E-07   | 0.000393 | 0.007802 | other          | 0          |
| <i>GPRC5B</i>  | Hippocampus | 4.06E-08   | 0.00057  | 6.11E-05 | increasing     | 0          |
| <i>GUCY1A3</i> | Hippocampus | 1.14E-07   | 0.000586 | 3.43E-05 | increasing     | 0          |
| <i>HAPLN1</i>  | Hippocampus | 3.44E-11   | -0.00068 | 6.88E-07 | decreasing     | 0          |

**Supplementary Table 9. Genes with a significant age effect from either ANOVA or linear regression. Beta is the regression coefficient, Pval is the p-value for the regression coefficient of expression on age (in days). Effect category is increasing if beta is positive and significant, decreasing if beta is negative and significant, and other if the ANOVA were significant rather than the linear regression. Local eQTL is 1 if the gene had a significant local eQTL**

| Gene                | Tissue      | Anova.pval | Beta     | Pval     | EffectCategory | Local eQTL |
|---------------------|-------------|------------|----------|----------|----------------|------------|
| <i>HAPLN2</i>       | Hippocampus | 1.82E-09   | 0.000649 | 2.86E-06 | increasing     | 0          |
| <i>HERPUD2</i>      | Hippocampus | 3.81E-05   | 0.000708 | 1.81E-07 | increasing     | 0          |
| <i>HIPK3</i>        | Hippocampus | 8.49E-08   | 0.00071  | 1.58E-07 | increasing     | 0          |
| <i>HSF2</i>         | Hippocampus | 7.84E-08   | 1.88E-05 | 0.901619 | other          | 0          |
| <i>HSPA1A</i>       | Hippocampus | 2.22E-07   | 0.000571 | 5.71E-05 | increasing     | 0          |
| <i>IFI44L</i>       | Hippocampus | 1.80E-08   | -0.00051 | 0.00043  | other          | 0          |
| <i>IGF2BP2</i>      | Hippocampus | 1.88E-12   | -0.0008  | 9.96E-10 | decreasing     | 0          |
| <i>IGFBPL1</i>      | Hippocampus | 5.21E-09   | -0.00057 | 6.49E-05 | decreasing     | 0          |
| <i>IGSF11</i>       | Hippocampus | 6.99E-08   | 0.000547 | 0.000129 | other          | 0          |
| <i>IGSF9</i>        | Hippocampus | 3.56E-09   | -0.00064 | 4.45E-06 | decreasing     | 0          |
| <i>INF2</i>         | Hippocampus | 8.17E-08   | 8.85E-05 | 0.560793 | other          | 0          |
| <i>ITGA1</i>        | Hippocampus | 1.81E-08   | -0.00052 | 0.000318 | other          | 0          |
| <i>JADE2</i>        | Hippocampus | 4.00E-11   | 0.000755 | 1.35E-08 | increasing     | 0          |
| <i>JARID2</i>       | Hippocampus | 5.93E-07   | -0.00071 | 1.33E-07 | decreasing     | 0          |
| <i>KCNA6</i>        | Hippocampus | 1.99E-07   | -0.00073 | 4.27E-08 | decreasing     | 0          |
| <i>KCNJ2</i>        | Hippocampus | 1.67E-08   | 0.000647 | 3.11E-06 | increasing     | 0          |
| <i>KIZ</i>          | Hippocampus | 2.10E-07   | 0.000479 | 0.000977 | other          | 0          |
| <i>KLF12</i>        | Hippocampus | 4.88E-08   | -0.00073 | 5.27E-08 | decreasing     | 0          |
| <i>KLK6</i>         | Hippocampus | 1.09E-07   | 0.000656 | 2.14E-06 | increasing     | 0          |
| <i>LAMA2</i>        | Hippocampus | 1.32E-07   | -0.00052 | 0.000285 | other          | 0          |
| <i>LAMA4</i>        | Hippocampus | 9.29E-08   | -0.00053 | 0.000247 | other          | 0          |
| <i>LAMC1</i>        | Hippocampus | 1.76E-11   | -0.00076 | 7.37E-09 | decreasing     | 0          |
| <i>LGALS1</i>       | Hippocampus | 3.41E-08   | -0.00041 | 0.005281 | other          | 0          |
| <i>LHFPL3</i>       | Hippocampus | 3.64E-08   | -0.00053 | 0.000212 | other          | 0          |
| <i>LIMA1</i>        | Hippocampus | 1.30E-07   | -0.00056 | 9.72E-05 | decreasing     | 0          |
| <i>LOC103216135</i> | Hippocampus | 8.34E-08   | 0.000645 | 3.44E-06 | increasing     | 0          |
| <i>LOC103217882</i> | Hippocampus | 1.67E-08   | 0.000605 | 1.69E-05 | increasing     | 0          |
| <i>LOC103218181</i> | Hippocampus | 2.50E-07   | -0.00041 | 0.005911 | other          | 0          |
| <i>LOC103219120</i> | Hippocampus | 1.60E-09   | -0.00066 | 1.62E-06 | decreasing     | 0          |
| <i>LOC103221933</i> | Hippocampus | 7.26E-11   | -0.00069 | 3.26E-07 | decreasing     | 0          |
| <i>LOC103221935</i> | Hippocampus | 7.68E-10   | -0.00071 | 1.49E-07 | decreasing     | 0          |
| <i>LOC103221936</i> | Hippocampus | 5.25E-08   | -0.00054 | 0.000188 | other          | 0          |
| <i>LOC103221937</i> | Hippocampus | 9.30E-08   | -0.00053 | 0.000205 | other          | 0          |
| <i>LOC103221943</i> | Hippocampus | 2.28E-10   | -0.0007  | 1.88E-07 | decreasing     | 0          |
| <i>LOC103221944</i> | Hippocampus | 1.26E-17   | -0.00085 | 1.16E-11 | decreasing     | 0          |
| <i>LOC103221945</i> | Hippocampus | 2.19E-09   | -0.00065 | 2.72E-06 | decreasing     | 0          |
| <i>LOC103221970</i> | Hippocampus | 1.69E-08   | -0.00066 | 2.10E-06 | decreasing     | 0          |
| <i>LOC103221996</i> | Hippocampus | 1.42E-07   | -0.00054 | 0.000179 | other          | 0          |
| <i>LOC103222001</i> | Hippocampus | 1.35E-07   | -0.00067 | 1.18E-06 | decreasing     | 0          |
| <i>LOC103222003</i> | Hippocampus | 1.08E-08   | -0.00065 | 2.25E-06 | decreasing     | 0          |



**Supplementary Table 9. Genes with a significant age effect from either ANOVA or linear regression. Beta is the regression coefficient, Pval is the p-value for the regression coefficient of expression on age (in days). Effect category is increasing if beta is positive and significant, decreasing if beta is negative and significant, and other if the ANOVA were significant rather than the linear regression. Local eQTL is 1 if the gene had a significant local eQTL**

| Gene                | Tissue      | Anova.pval | Beta     | Pval     | EffectCategory | Local eQTL |
|---------------------|-------------|------------|----------|----------|----------------|------------|
| <i>LOC103222004</i> | Hippocampus | 2.38E-07   | -0.00069 | 5.52E-07 | decreasing     | 0          |
| <i>LOC103222006</i> | Hippocampus | 7.32E-11   | -0.0007  | 2.63E-07 | decreasing     | 0          |
| <i>LOC103222080</i> | Hippocampus | 4.53E-08   | -0.00041 | 0.004938 | other          | 0          |
| <i>LOC103222083</i> | Hippocampus | 9.93E-12   | 0.000782 | 2.59E-09 | increasing     | 0          |
| <i>LOC103222369</i> | Hippocampus | 2.09E-08   | -0.00047 | 0.001217 | other          | 0          |
| <i>LOC103222373</i> | Hippocampus | 1.54E-07   | -0.00064 | 3.84E-06 | decreasing     | 0          |
| <i>LOC103222375</i> | Hippocampus | 6.37E-11   | 0.000784 | 1.77E-11 | increasing     | 0          |
| <i>LOC103224456</i> | Hippocampus | 5.75E-11   | 0.000746 | 2.28E-08 | increasing     | 0          |
| <i>LOC103226908</i> | Hippocampus | 6.58E-13   | 0.000818 | 2.10E-10 | increasing     | 0          |
| <i>LOC103229779</i> | Hippocampus | 7.79E-08   | 0.000713 | 1.39E-07 | increasing     | 0          |
| <i>LOC103230353</i> | Hippocampus | 2.90E-08   | 0.000641 | 3.99E-06 | increasing     | 0          |
| <i>LOC103230650</i> | Hippocampus | 5.79E-08   | -0.00052 | 0.000331 | other          | 0          |
| <i>LOC103230800</i> | Hippocampus | 1.24E-07   | -0.00053 | 0.000257 | other          | 0          |
| <i>LOC103231153</i> | Hippocampus | 1.98E-08   | -0.00061 | 1.46E-05 | decreasing     | 0          |
| <i>LOC103231593</i> | Hippocampus | 5.25E-09   | 0.000739 | 3.44E-08 | increasing     | 0          |
| <i>LOC103232525</i> | Hippocampus | 1.25E-08   | 0.000654 | 2.30E-06 | increasing     | 0          |
| <i>LOC103232526</i> | Hippocampus | 7.55E-09   | 0.000674 | 9.56E-07 | increasing     | 0          |
| <i>LOC103232983</i> | Hippocampus | 7.84E-08   | -0.00037 | 0.012755 | other          | 0          |
| <i>LOC103233496</i> | Hippocampus | 1.18E-08   | -0.00052 | 0.000271 | other          | 0          |
| <i>LOC103233517</i> | Hippocampus | 8.67E-07   | 0.000633 | 2.41E-07 | increasing     | 0          |
| <i>LOC103234252</i> | Hippocampus | 8.16E-11   | 0.000759 | 1.03E-08 | increasing     | 0          |
| <i>LOC103234282</i> | Hippocampus | 3.96E-11   | 0.000692 | 2.63E-07 | increasing     | 0          |
| <i>LOC103234347</i> | Hippocampus | 1.29E-07   | -0.00062 | 1.01E-05 | decreasing     | 0          |
| <i>LOC103235597</i> | Hippocampus | 5.51E-09   | -0.00055 | 0.000106 | other          | 0          |
| <i>LOC103236607</i> | Hippocampus | 8.18E-09   | -0.00073 | 5.26E-08 | decreasing     | 0          |
| <i>LOC103236784</i> | Hippocampus | 1.38E-07   | 0.000567 | 6.75E-05 | increasing     | 0          |
| <i>LOC103237777</i> | Hippocampus | 3.26E-07   | 0.000758 | 1.09E-08 | increasing     | 0          |
| <i>LOC103237807</i> | Hippocampus | 2.06E-08   | 0.000668 | 1.22E-06 | increasing     | 0          |
| <i>LOC103239962</i> | Hippocampus | 4.22E-11   | 0.000741 | 1.86E-08 | increasing     | 0          |
| <i>LOC103240459</i> | Hippocampus | 4.66E-06   | 0.000707 | 3.13E-09 | increasing     | 0          |
| <i>LOC103241513</i> | Hippocampus | 5.23E-06   | 0.000619 | 1.26E-07 | increasing     | 0          |
| <i>LOC103243139</i> | Hippocampus | 6.56E-09   | 0.000646 | 3.20E-06 | increasing     | 0          |
| <i>LONP2</i>        | Hippocampus | 7.30E-08   | 0.000636 | 5.03E-06 | increasing     | 0          |
| <i>LPCAT1</i>       | Hippocampus | 1.28E-09   | -0.00077 | 4.38E-09 | decreasing     | 0          |
| <i>LRRK2</i>        | Hippocampus | 2.80E-09   | 0.00074  | 3.16E-08 | increasing     | 0          |
| <i>LTBP1</i>        | Hippocampus | 4.99E-11   | -0.00076 | 1.10E-08 | decreasing     | 0          |
| <i>LY86</i>         | Hippocampus | 2.22E-07   | 0.000572 | 5.57E-05 | increasing     | 0          |
| <i>MARVELD1</i>     | Hippocampus | 3.68E-09   | -0.00067 | 1.37E-06 | decreasing     | 0          |
| <i>MATN3</i>        | Hippocampus | 1.37E-08   | -0.00063 | 5.63E-06 | decreasing     | 0          |
| <i>MAZ</i>          | Hippocampus | 3.27E-08   | -0.00075 | 1.80E-08 | decreasing     | 0          |

**Supplementary Table 9. Genes with a significant age effect from either ANOVA or linear regression. Beta is the regression coefficient, Pval is the p-value for the regression coefficient of expression on age (in days). Effect category is increasing if beta is positive and significant, decreasing if beta is negative and significant, and other if the ANOVA were significant rather than the linear regression. Local eQTL is 1 if the gene had a significant local eQTL**

| Gene           | Tissue      | Anova.pval | Beta     | Pval     | EffectCategory | Local eQTL |
|----------------|-------------|------------|----------|----------|----------------|------------|
| <i>MBL2</i>    | Hippocampus | 8.29E-07   | 0.000638 | 6.83E-08 | increasing     | 0          |
| <i>MBNL2</i>   | Hippocampus | 2.22E-09   | 0.000736 | 4.05E-08 | increasing     | 0          |
| <i>MEX3A</i>   | Hippocampus | 2.38E-10   | -0.00062 | 7.95E-06 | decreasing     | 0          |
| <i>MEX3B</i>   | Hippocampus | 1.18E-09   | -0.0007  | 2.09E-07 | decreasing     | 0          |
| <i>MID1IP1</i> | Hippocampus | 2.62E-08   | 0.000673 | 9.89E-07 | increasing     | 0          |
| <i>MKI67</i>   | Hippocampus | 2.90E-08   | -0.00055 | 0.000106 | other          | 0          |
| <i>MKRN3</i>   | Hippocampus | 8.80E-13   | -0.00063 | 5.22E-06 | decreasing     | 0          |
| <i>MPZL2</i>   | Hippocampus | 9.19E-08   | 0.000655 | 2.19E-06 | increasing     | 0          |
| <i>MRC2</i>    | Hippocampus | 1.51E-07   | -0.00072 | 7.55E-08 | decreasing     | 0          |
| <i>MYC</i>     | Hippocampus | 3.22E-09   | -0.00063 | 5.92E-06 | decreasing     | 0          |
| <i>MYO16</i>   | Hippocampus | 2.22E-09   | -0.00068 | 5.86E-07 | decreasing     | 0          |
| <i>NAPEPLD</i> | Hippocampus | 1.34E-10   | 0.000697 | 3.10E-07 | increasing     | 0          |
| <i>NASP</i>    | Hippocampus | 9.45E-09   | -0.00056 | 8.84E-05 | decreasing     | 0          |
| <i>NAV1</i>    | Hippocampus | 1.26E-07   | -0.00069 | 4.42E-07 | decreasing     | 0          |
| <i>NCAPG</i>   | Hippocampus | 1.91E-07   | -0.00049 | 0.000764 | other          | 0          |
| <i>NCKIPSD</i> | Hippocampus | 1.69E-08   | 0.000457 | 0.00175  | other          | 0          |
| <i>NCS1</i>    | Hippocampus | 2.61E-07   | 0.000518 | 0.000324 | other          | 0          |
| <i>NDC80</i>   | Hippocampus | 7.59E-09   | -0.00056 | 4.60E-05 | decreasing     | 0          |
| <i>NDRG1</i>   | Hippocampus | 7.70E-10   | 0.000665 | 1.42E-06 | increasing     | 0          |
| <i>NDRG2</i>   | Hippocampus | 2.53E-07   | 0.000505 | 0.000475 | other          | 0          |
| <i>NETO2</i>   | Hippocampus | 2.17E-09   | -0.00066 | 1.59E-06 | decreasing     | 0          |
| <i>NFATC3</i>  | Hippocampus | 5.82E-09   | 0.000674 | 9.47E-07 | increasing     | 0          |
| <i>NID1</i>    | Hippocampus | 1.34E-08   | -0.00063 | 5.57E-06 | decreasing     | 0          |
| <i>NID2</i>    | Hippocampus | 7.49E-09   | -0.00046 | 0.001514 | other          | 0          |
| <i>NKIRAS2</i> | Hippocampus | 4.91E-08   | -0.00071 | 1.38E-07 | decreasing     | 0          |
| <i>NQO1</i>    | Hippocampus | 2.49E-12   | 0.000848 | 2.01E-11 | increasing     | 0          |
| <i>NRAS</i>    | Hippocampus | 8.02E-08   | -0.00043 | 0.003334 | other          | 0          |
| <i>NREP</i>    | Hippocampus | 9.57E-08   | -0.00068 | 7.63E-07 | decreasing     | 0          |
| <i>NRXN1</i>   | Hippocampus | 9.60E-09   | -0.00044 | 0.002442 | other          | 0          |
| <i>NT5DC2</i>  | Hippocampus | 1.07E-08   | -0.00019 | 0.208959 | other          | 0          |
| <i>NTS</i>     | Hippocampus | 1.42E-07   | -0.00013 | 0.374183 | other          | 0          |
| <i>NTSR2</i>   | Hippocampus | 6.48E-11   | 0.000748 | 2.08E-08 | increasing     | 0          |
| <i>NWD2</i>    | Hippocampus | 9.50E-09   | -0.00073 | 5.79E-08 | decreasing     | 0          |
| <i>OTOG</i>    | Hippocampus | 1.84E-05   | 0.000721 | 9.01E-08 | increasing     | 0          |
| <i>PAMR1</i>   | Hippocampus | 8.79E-08   | 0.000577 | 4.68E-05 | increasing     | 0          |
| <i>PCDH15</i>  | Hippocampus | 3.27E-12   | -0.00079 | 1.34E-09 | decreasing     | 0          |
| <i>PCGF5</i>   | Hippocampus | 1.13E-08   | 0.000674 | 9.48E-07 | increasing     | 0          |
| <i>PDE8A</i>   | Hippocampus | 2.47E-08   | 0.000646 | 3.28E-06 | increasing     | 0          |
| <i>PDGFRA</i>  | Hippocampus | 3.03E-09   | -0.00064 | 3.85E-06 | decreasing     | 0          |
| <i>PFKP</i>    | Hippocampus | 5.17E-11   | 0.000731 | 5.29E-08 | increasing     | 0          |

**Supplementary Table 9. Genes with a significant age effect from either ANOVA or linear regression. Beta is the regression coefficient, Pval is the p-value for the regression coefficient of expression on age (in days). Effect category is increasing if beta is positive and significant, decreasing if beta is negative and significant, and other if the ANOVA were significant rather than the linear regression. Local eQTL is 1 if the gene had a significant local eQTL**

| Gene            | Tissue      | Anova.pval | Beta     | Pval     | EffectCategory | Local eQTL |
|-----------------|-------------|------------|----------|----------|----------------|------------|
| <i>PIP4K2A</i>  | Hippocampus | 1.60E-07   | 0.000659 | 1.84E-06 | increasing     | 0          |
| <i>PIR</i>      | Hippocampus | 9.48E-08   | 0.000634 | 5.30E-06 | increasing     | 0          |
| <i>PKP1</i>     | Hippocampus | 3.38E-08   | -0.00076 | 1.15E-08 | decreasing     | 0          |
| <i>PLEKHB1</i>  | Hippocampus | 1.87E-09   | 0.000679 | 7.38E-07 | increasing     | 0          |
| <i>PMP22</i>    | Hippocampus | 4.47E-10   | 0.000731 | 5.41E-08 | increasing     | 0          |
| <i>PNRC1</i>    | Hippocampus | 1.47E-10   | 0.000759 | 1.08E-08 | increasing     | 0          |
| <i>PPL</i>      | Hippocampus | 5.47E-09   | 0.00072  | 9.42E-08 | increasing     | 0          |
| <i>PTK7</i>     | Hippocampus | 5.88E-08   | -0.00056 | 7.46E-05 | decreasing     | 0          |
| <i>PTN</i>      | Hippocampus | 4.48E-09   | -0.00065 | 2.63E-06 | decreasing     | 0          |
| <i>PTPRO</i>    | Hippocampus | 9.62E-08   | -0.00047 | 0.001213 | other          | 0          |
| <i>PTX3</i>     | Hippocampus | 9.93E-08   | -0.00066 | 2.18E-06 | decreasing     | 0          |
| <i>PXK</i>      | Hippocampus | 2.12E-08   | 0.000681 | 6.76E-07 | increasing     | 0          |
| <i>RAB7B</i>    | Hippocampus | 1.59E-11   | -0.0007  | 2.18E-07 | decreasing     | 0          |
| <i>RASEF</i>    | Hippocampus | 1.06E-07   | 0.000661 | 1.71E-06 | increasing     | 0          |
| <i>RASGRF2</i>  | Hippocampus | 2.12E-07   | 0.000424 | 0.003889 | other          | 0          |
| <i>RASSF10</i>  | Hippocampus | 1.86E-07   | -0.00054 | 0.000156 | other          | 0          |
| <i>RBP1</i>     | Hippocampus | 6.40E-08   | -0.00061 | 1.37E-05 | decreasing     | 0          |
| <i>RHOQ</i>     | Hippocampus | 6.45E-07   | 0.000758 | 1.11E-08 | increasing     | 0          |
| <i>RIF1</i>     | Hippocampus | 7.88E-11   | 0.000794 | 1.14E-09 | increasing     | 0          |
| <i>RNF152</i>   | Hippocampus | 1.82E-07   | -0.00066 | 1.78E-06 | decreasing     | 0          |
| <i>RPE65</i>    | Hippocampus | 1.67E-09   | 0.00064  | 4.21E-06 | increasing     | 0          |
| <i>RPRM</i>     | Hippocampus | 1.27E-07   | -0.00065 | 3.26E-06 | decreasing     | 0          |
| <i>RRAS2</i>    | Hippocampus | 6.76E-10   | -0.00058 | 4.24E-05 | decreasing     | 0          |
| <i>SCRG1</i>    | Hippocampus | 1.59E-07   | -0.00053 | 0.000196 | other          | 0          |
| <i>SEL1L3</i>   | Hippocampus | 6.99E-08   | -0.00057 | 5.17E-05 | decreasing     | 0          |
| <i>SEMA3C</i>   | Hippocampus | 6.12E-12   | -0.00083 | 1.06E-10 | decreasing     | 0          |
| <i>SH2D5</i>    | Hippocampus | 6.72E-11   | 0.000665 | 1.40E-06 | increasing     | 0          |
| <i>SH3RF3</i>   | Hippocampus | 1.38E-08   | -0.00075 | 1.91E-08 | decreasing     | 0          |
| <i>SIRT2</i>    | Hippocampus | 6.94E-08   | -0.00046 | 0.001623 | other          | 0          |
| <i>SLC16A1</i>  | Hippocampus | 8.91E-08   | -0.00039 | 0.00896  | other          | 0          |
| <i>SLC16A14</i> | Hippocampus | 7.41E-08   | -0.0004  | 0.006644 | other          | 0          |
| <i>SLC17A2</i>  | Hippocampus | 1.19E-10   | 0.000804 | 2.29E-10 | increasing     | 0          |
| <i>SLC17A3</i>  | Hippocampus | 7.36E-10   | 0.000817 | 1.69E-10 | increasing     | 0          |
| <i>SLC26A11</i> | Hippocampus | 9.08E-08   | 0.000584 | 3.63E-05 | increasing     | 0          |
| <i>SLC36A1</i>  | Hippocampus | 8.61E-08   | -0.00067 | 1.14E-06 | decreasing     | 0          |
| <i>SLC38A1</i>  | Hippocampus | 7.05E-08   | -0.0005  | 0.000511 | other          | 0          |
| <i>SLC4A11</i>  | Hippocampus | 1.58E-08   | 0.000658 | 1.90E-06 | increasing     | 0          |
| <i>SLC5A11</i>  | Hippocampus | 5.60E-08   | 0.000564 | 7.28E-05 | increasing     | 0          |
| <i>SLCO1A2</i>  | Hippocampus | 5.35E-10   | 0.000728 | 6.19E-08 | increasing     | 0          |
| <i>SNCAIP</i>   | Hippocampus | 1.13E-09   | -0.00067 | 1.29E-06 | decreasing     | 0          |

**Supplementary Table 9. Genes with a significant age effect from either ANOVA or linear regression. Beta is the regression coefficient, Pval is the p-value for the regression coefficient of expression on age (in days). Effect category is increasing if beta is positive and significant, decreasing if beta is negative and significant, and other if the ANOVA were significant rather than the linear regression. Local eQTL is 1 if the gene had a significant local eQTL**

| Gene           | Tissue      | Anova.pval | Beta     | Pval     | EffectCategory | Local eQTL |
|----------------|-------------|------------|----------|----------|----------------|------------|
| <i>SNED1</i>   | Hippocampus | 2.56E-07   | 0.000335 | 0.024616 | other          | 0          |
| <i>SOX11</i>   | Hippocampus | 1.40E-08   | -0.00049 | 0.000762 | other          | 0          |
| <i>SOX4</i>    | Hippocampus | 3.22E-16   | -0.00086 | 8.29E-12 | decreasing     | 0          |
| <i>SPOCK3</i>  | Hippocampus | 1.01E-06   | 0.000713 | 1.40E-07 | increasing     | 0          |
| <i>SPP1</i>    | Hippocampus | 1.06E-09   | 0.000753 | 1.54E-08 | increasing     | 0          |
| <i>SRD5A1</i>  | Hippocampus | 9.66E-09   | -0.00066 | 1.68E-06 | decreasing     | 0          |
| <i>SSTR1</i>   | Hippocampus | 2.14E-09   | -0.00065 | 2.64E-06 | decreasing     | 0          |
| <i>SULT1E1</i> | Hippocampus | 2.46E-07   | -0.00045 | 0.001943 | other          | 0          |
| <i>SVEP1</i>   | Hippocampus | 1.98E-08   | 0.000615 | 1.15E-05 | increasing     | 0          |
| <i>SYNE2</i>   | Hippocampus | 6.06E-08   | -0.00052 | 0.000319 | other          | 0          |
| <i>TAGLN2</i>  | Hippocampus | 1.20E-07   | -0.00042 | 0.004141 | other          | 0          |
| <i>TBX3</i>    | Hippocampus | 1.56E-07   | -0.00061 | 1.22E-05 | decreasing     | 0          |
| <i>TCF4</i>    | Hippocampus | 1.50E-07   | -0.00062 | 9.01E-06 | decreasing     | 0          |
| <i>TET3</i>    | Hippocampus | 1.43E-08   | -0.0007  | 3.08E-07 | decreasing     | 0          |
| <i>THBS1</i>   | Hippocampus | 2.64E-08   | -0.00061 | 1.17E-05 | decreasing     | 0          |
| <i>TMEM144</i> | Hippocampus | 2.44E-07   | 0.000611 | 1.35E-05 | increasing     | 0          |
| <i>TMEM169</i> | Hippocampus | 4.30E-10   | -0.00076 | 9.08E-09 | decreasing     | 0          |
| <i>TMEM235</i> | Hippocampus | 1.31E-08   | 0.000606 | 1.63E-05 | increasing     | 0          |
| <i>TNC</i>     | Hippocampus | 4.13E-09   | -0.00071 | 1.55E-07 | decreasing     | 0          |
| <i>TNFAIP6</i> | Hippocampus | 4.80E-09   | 0.000715 | 1.27E-07 | increasing     | 0          |
| <i>TNFSF13</i> | Hippocampus | 5.01E-08   | 0.000682 | 6.30E-07 | increasing     | 0          |
| <i>TPD52L1</i> | Hippocampus | 3.74E-06   | 0.000733 | 4.72E-08 | increasing     | 0          |
| <i>TRAF3</i>   | Hippocampus | 3.32E-08   | -0.00068 | 8.86E-07 | decreasing     | 0          |
| <i>TRIB2</i>   | Hippocampus | 3.67E-09   | -0.00072 | 1.08E-07 | decreasing     | 0          |
| <i>TRIO</i>    | Hippocampus | 3.29E-08   | -0.00072 | 1.01E-07 | decreasing     | 0          |
| <i>TSPAN11</i> | Hippocampus | 9.49E-08   | -0.00063 | 5.45E-06 | decreasing     | 0          |
| <i>TSPAN2</i>  | Hippocampus | 2.55E-09   | -0.00054 | 0.000189 | other          | 0          |
| <i>TUBB</i>    | Hippocampus | 6.15E-11   | -0.0007  | 3.02E-07 | decreasing     | 0          |
| <i>UHRF1</i>   | Hippocampus | 4.69E-08   | -0.00037 | 0.011886 | other          | 0          |
| <i>VAV2</i>    | Hippocampus | 7.64E-08   | -0.0006  | 2.42E-05 | decreasing     | 0          |
| <i>YBX1</i>    | Hippocampus | 2.68E-11   | -0.00073 | 4.31E-08 | decreasing     | 0          |
| <i>ZDHHC2</i>  | Hippocampus | 1.74E-07   | -0.00049 | 0.000811 | other          | 0          |
| <i>ZDHHC20</i> | Hippocampus | 6.05E-10   | 0.000737 | 3.81E-08 | increasing     | 0          |
| <i>ZNF483</i>  | Hippocampus | 1.19E-12   | 0.000705 | 2.07E-07 | increasing     | 0          |
| <i>AARD</i>    | Pituitary   | 2.16E-08   | -0.00059 | 1.12E-05 | decreasing     | 0          |
| <i>ABCA6</i>   | Pituitary   | 2.68E-10   | -0.00038 | 0.007225 | other          | 0          |
| <i>ABCA8</i>   | Pituitary   | 1.66E-07   | -0.00038 | 0.008439 | other          | 0          |
| <i>ACO1</i>    | Pituitary   | 2.72E-10   | 0.000714 | 4.99E-08 | increasing     | 1          |
| <i>ADAM10</i>  | Pituitary   | 8.13E-08   | -0.00019 | 0.193038 | other          | 0          |
| <i>ADAM32</i>  | Pituitary   | 1.14E-08   | 0.000447 | 0.002044 | other          | 0          |

**Supplementary Table 9. Genes with a significant age effect from either ANOVA or linear regression. Beta is the regression coefficient, Pval is the p-value for the regression coefficient of expression on age (in days). Effect category is increasing if beta is positive and significant, decreasing if beta is negative and significant, and other if the ANOVA were significant rather than the linear regression. Local eQTL is 1 if the gene had a significant local eQTL**

| Gene              | Tissue    | Anova.pval | Beta     | Pval     | EffectCategory | Local eQTL |
|-------------------|-----------|------------|----------|----------|----------------|------------|
| <i>ADAMTS9</i>    | Pituitary | 1.28E-08   | -0.0007  | 2.06E-07 | decreasing     | 0          |
| <i>ADD2</i>       | Pituitary | 8.29E-07   | 0.000745 | 4.55E-09 | increasing     | 0          |
| <i>ADSSL1</i>     | Pituitary | 1.16E-07   | 0.000562 | 9.24E-05 | increasing     | 0          |
| <i>AGAP3</i>      | Pituitary | 3.38E-08   | 0.000494 | 0.000381 | other          | 1          |
| <i>AGFG2</i>      | Pituitary | 2.47E-08   | 0.00066  | 1.34E-06 | increasing     | 0          |
| <i>ALAD</i>       | Pituitary | 6.49E-08   | 0.000602 | 1.90E-05 | increasing     | 0          |
| <i>AMICA1</i>     | Pituitary | 7.07E-11   | -0.00081 | 2.40E-10 | decreasing     | 0          |
| <i>AMMECR1</i>    | Pituitary | 8.61E-08   | -0.00029 | 0.047845 | other          | 0          |
| <i>ANGEL1</i>     | Pituitary | 1.23E-11   | 0.00057  | 5.37E-05 | increasing     | 0          |
| <i>ANKEF1</i>     | Pituitary | 7.99E-08   | 0.000311 | 0.030649 | other          | 0          |
| <i>ANKRD34C</i>   | Pituitary | 1.75E-08   | 0.000678 | 2.24E-07 | increasing     | 0          |
| <i>ANKS1B</i>     | Pituitary | 5.80E-11   | 0.000597 | 2.61E-05 | increasing     | 0          |
| <i>ANLN</i>       | Pituitary | 5.19E-12   | -0.0007  | 7.81E-08 | decreasing     | 0          |
| <i>ANXA11</i>     | Pituitary | 7.55E-08   | 0.000724 | 1.72E-08 | increasing     | 1          |
| <i>ANXA5</i>      | Pituitary | 4.91E-06   | -0.00071 | 4.73E-08 | decreasing     | 0          |
| <i>APBA2</i>      | Pituitary | 1.33E-07   | -0.00055 | 0.000144 | other          | 0          |
| <i>ARFGAP1</i>    | Pituitary | 1.02E-07   | 0.000396 | 0.006209 | other          | 0          |
| <i>ARHGAP11A</i>  | Pituitary | 2.07E-12   | -0.00068 | 1.70E-07 | decreasing     | 0          |
| <i>ARHGEF17</i>   | Pituitary | 3.76E-08   | 0.000609 | 1.48E-05 | increasing     | 0          |
| <i>ARPP21</i>     | Pituitary | 5.46E-10   | 0.00031  | 0.031481 | other          | 0          |
| <i>ARX</i>        | Pituitary | 1.28E-11   | 0.00074  | 6.48E-09 | increasing     | 0          |
| <i>ASAP3</i>      | Pituitary | 9.52E-06   | -0.00072 | 2.46E-08 | decreasing     | 0          |
| <i>ASPM</i>       | Pituitary | 8.98E-10   | -0.00063 | 2.20E-06 | decreasing     | 0          |
| <i>ATP6VOA1</i>   | Pituitary | 2.00E-07   | 0.000607 | 6.51E-06 | increasing     | 0          |
| <i>AUH</i>        | Pituitary | 4.64E-08   | 0.000277 | 0.059605 | other          | 0          |
| <i>AURKB</i>      | Pituitary | 2.47E-09   | -0.00065 | 2.06E-06 | decreasing     | 0          |
| <i>B4GALNT1</i>   | Pituitary | 1.26E-07   | 0.000566 | 6.26E-05 | increasing     | 0          |
| <i>BAHD1</i>      | Pituitary | 2.33E-10   | 0.000481 | 0.000736 | other          | 0          |
| <i>BAI1</i>       | Pituitary | 7.94E-08   | 0.000403 | 0.006436 | other          | 0          |
| <i>BARD1</i>      | Pituitary | 6.36E-09   | -0.00062 | 9.99E-06 | decreasing     | 0          |
| <i>BBIP1</i>      | Pituitary | 7.78E-08   | -0.00015 | 0.329145 | other          | 0          |
| <i>BHMT2</i>      | Pituitary | 4.78E-14   | 0.000789 | 1.39E-09 | increasing     | 0          |
| <i>BIRC5</i>      | Pituitary | 4.87E-11   | -0.0007  | 7.82E-08 | decreasing     | 0          |
| <i>BIVM</i>       | Pituitary | 4.55E-08   | -0.00058 | 4.15E-05 | decreasing     | 0          |
| <i>BMF</i>        | Pituitary | 7.78E-07   | -0.0007  | 9.21E-08 | decreasing     | 0          |
| <i>BMP6</i>       | Pituitary | 4.77E-08   | -0.00076 | 2.09E-09 | decreasing     | 0          |
| <i>BUB1</i>       | Pituitary | 1.05E-11   | -0.00068 | 2.79E-07 | decreasing     | 0          |
| <i>BUB1B</i>      | Pituitary | 2.38E-12   | -0.0007  | 1.40E-07 | decreasing     | 0          |
| <i>C18H18orf8</i> | Pituitary | 2.79E-05   | 0.000678 | 2.33E-07 | increasing     | 0          |
| <i>C1H11orf53</i> | Pituitary | 1.60E-11   | -0.00083 | 1.17E-10 | decreasing     | 0          |

**Supplementary Table 9. Genes with a significant age effect from either ANOVA or linear regression. Beta is the regression coefficient, Pval is the p-value for the regression coefficient of expression on age (in days). Effect category is increasing if beta is positive and significant, decreasing if beta is negative and significant, and other if the ANOVA were significant rather than the linear regression. Local eQTL is 1 if the gene had a significant local eQTL**

| Gene               | Tissue    | Anova.pval | Beta     | Pval     | EffectCategory | Local eQTL |
|--------------------|-----------|------------|----------|----------|----------------|------------|
| <i>C23H5orf15</i>  | Pituitary | 3.55E-08   | -0.00056 | 6.00E-05 | decreasing     | 0          |
| <i>C26H15orf27</i> | Pituitary | 8.87E-08   | 0.000678 | 2.34E-07 | increasing     | 0          |
| <i>C5H16orf87</i>  | Pituitary | 7.59E-08   | -0.00049 | 0.000836 | other          | 0          |
| <i>CA10</i>        | Pituitary | 3.12E-08   | -0.00076 | 2.02E-09 | decreasing     | 0          |
| <i>CACNA1C</i>     | Pituitary | 3.02E-06   | 0.000708 | 7.25E-08 | increasing     | 0          |
| <i>CACNG4</i>      | Pituitary | 2.01E-07   | -0.00063 | 3.98E-06 | decreasing     | 0          |
| <i>CALCR</i>       | Pituitary | 1.16E-08   | 0.000741 | 6.00E-09 | increasing     | 0          |
| <i>CAMK1G</i>      | Pituitary | 9.39E-11   | -0.00061 | 1.86E-05 | decreasing     | 0          |
| <i>CAMKV</i>       | Pituitary | 7.64E-10   | 0.000648 | 1.03E-06 | increasing     | 0          |
| <i>CAPN6</i>       | Pituitary | 1.26E-07   | -0.00066 | 2.50E-06 | decreasing     | 0          |
| <i>CASC5</i>       | Pituitary | 1.30E-07   | -0.00056 | 4.70E-05 | decreasing     | 0          |
| <i>CASK</i>        | Pituitary | 3.70E-11   | -0.00014 | 0.336776 | other          | 0          |
| <i>CAT</i>         | Pituitary | 4.69E-10   | -0.00074 | 4.85E-08 | decreasing     | 0          |
| <i>CBFB</i>        | Pituitary | 1.39E-07   | -0.00041 | 0.005438 | other          | 0          |
| <i>CBX2</i>        | Pituitary | 4.84E-08   | -0.00073 | 9.72E-09 | decreasing     | 0          |
| <i>CBX7</i>        | Pituitary | 5.93E-10   | 0.000678 | 5.65E-07 | increasing     | 0          |
| <i>CCNB2</i>       | Pituitary | 2.69E-12   | -0.00076 | 2.89E-09 | decreasing     | 0          |
| <i>CDC25C</i>      | Pituitary | 7.32E-10   | -0.00058 | 2.87E-05 | decreasing     | 0          |
| <i>CDC42SE2</i>    | Pituitary | 1.12E-07   | -0.00017 | 0.275365 | other          | 0          |
| <i>CDC45</i>       | Pituitary | 2.64E-09   | -0.00068 | 1.76E-07 | decreasing     | 1          |
| <i>CDC6</i>        | Pituitary | 7.60E-12   | -0.00061 | 9.20E-06 | decreasing     | 0          |
| <i>CDCA2</i>       | Pituitary | 4.54E-09   | -0.00063 | 3.90E-06 | decreasing     | 0          |
| <i>CDCA3</i>       | Pituitary | 9.03E-08   | -0.00058 | 3.26E-05 | decreasing     | 0          |
| <i>CDCA5</i>       | Pituitary | 1.47E-10   | -0.00064 | 1.71E-06 | decreasing     | 0          |
| <i>CDCA7L</i>      | Pituitary | 3.65E-12   | -0.00071 | 3.93E-08 | decreasing     | 1          |
| <i>CDCA8</i>       | Pituitary | 1.65E-12   | -0.00074 | 1.34E-08 | decreasing     | 0          |
| <i>CDH13</i>       | Pituitary | 1.92E-08   | -0.00079 | 3.04E-09 | decreasing     | 0          |
| <i>CDH26</i>       | Pituitary | 3.03E-10   | 0.000729 | 1.26E-08 | increasing     | 0          |
| <i>CDH7</i>        | Pituitary | 5.94E-08   | -0.00056 | 4.44E-05 | decreasing     | 0          |
| <i>CDK1</i>        | Pituitary | 1.91E-12   | -0.00064 | 3.48E-06 | decreasing     | 0          |
| <i>CDK19</i>       | Pituitary | 1.15E-07   | -0.00024 | 0.091842 | other          | 0          |
| <i>CDT1</i>        | Pituitary | 5.45E-11   | -0.00064 | 2.21E-06 | decreasing     | 0          |
| <i>CEACAM16</i>    | Pituitary | 8.15E-14   | -0.00081 | 5.94E-11 | decreasing     | 0          |
| <i>CELF6</i>       | Pituitary | 2.55E-07   | 0.000551 | 5.79E-05 | increasing     | 0          |
| <i>CENPA</i>       | Pituitary | 3.80E-10   | -0.0006  | 1.21E-05 | decreasing     | 0          |
| <i>CENPF</i>       | Pituitary | 1.27E-09   | -0.00068 | 1.65E-07 | decreasing     | 0          |
| <i>CENPM</i>       | Pituitary | 6.52E-11   | -0.00061 | 7.78E-06 | decreasing     | 0          |
| <i>CENPT</i>       | Pituitary | 5.60E-08   | -0.00066 | 6.81E-07 | decreasing     | 0          |
| <i>CENPU</i>       | Pituitary | 2.84E-09   | -0.00061 | 7.01E-06 | decreasing     | 0          |
| <i>CENPW</i>       | Pituitary | 1.85E-10   | -0.00069 | 2.29E-07 | decreasing     | 0          |

**Supplementary Table 9. Genes with a significant age effect from either ANOVA or linear regression. Beta is the regression coefficient, Pval is the p-value for the regression coefficient of expression on age (in days). Effect category is increasing if beta is positive and significant, decreasing if beta is negative and significant, and other if the ANOVA were significant rather than the linear regression. Local eQTL is 1 if the gene had a significant local eQTL**

| Gene            | Tissue    | Anova.pval | Beta      | Pval     | EffectCategory | Local eQTL |
|-----------------|-----------|------------|-----------|----------|----------------|------------|
| <i>CEP55</i>    | Pituitary | 6.06E-12   | -0.00064  | 2.10E-06 | decreasing     | 0          |
| <i>CHAF1B</i>   | Pituitary | 7.59E-08   | -0.00025  | 0.094812 | other          | 0          |
| <i>CHL1</i>     | Pituitary | 2.20E-07   | 0.000434  | 0.003312 | other          | 0          |
| <i>CHPF2</i>    | Pituitary | 2.96E-08   | 0.000381  | 0.009382 | other          | 0          |
| <i>CHRNB1</i>   | Pituitary | 2.24E-06   | -0.00069  | 1.54E-07 | decreasing     | 0          |
| <i>CKAP2</i>    | Pituitary | 1.43E-09   | -0.00068  | 2.58E-07 | decreasing     | 0          |
| <i>CKS2</i>     | Pituitary | 8.49E-08   | -0.00064  | 2.29E-06 | decreasing     | 0          |
| <i>CLDN1</i>    | Pituitary | 4.61E-07   | -0.00069  | 1.18E-07 | decreasing     | 0          |
| <i>CLDN6</i>    | Pituitary | 1.66E-07   | -0.00058  | 1.63E-05 | decreasing     | 0          |
| <i>CLIC4</i>    | Pituitary | 1.26E-07   | -0.00063  | 2.23E-06 | decreasing     | 0          |
| <i>CLSPN</i>    | Pituitary | 1.50E-08   | -0.00058  | 2.50E-05 | decreasing     | 0          |
| <i>CLTCL1</i>   | Pituitary | 8.20E-08   | 0.000674  | 2.83E-07 | increasing     | 0          |
| <i>CNOT2</i>    | Pituitary | 2.16E-07   | -0.0003   | 0.03881  | other          | 0          |
| <i>COBL</i>     | Pituitary | 9.80E-06   | 0.000686  | 1.48E-07 | increasing     | 0          |
| <i>COL15A1</i>  | Pituitary | 8.57E-06   | -0.00068  | 2.14E-07 | decreasing     | 0          |
| <i>COMMD2</i>   | Pituitary | 1.01E-09   | -0.00058  | 2.86E-05 | decreasing     | 0          |
| <i>CPT1A</i>    | Pituitary | 4.62E-09   | -0.00064  | 1.43E-06 | decreasing     | 0          |
| <i>CPXM1</i>    | Pituitary | 4.44E-10   | -0.00067  | 3.22E-07 | decreasing     | 0          |
| <i>CRISPLD1</i> | Pituitary | 1.06E-07   | -0.00054  | 0.00012  | other          | 1          |
| <i>CST6</i>     | Pituitary | 1.94E-07   | 0.000205  | 0.171864 | other          | 0          |
| <i>CTDSPL2</i>  | Pituitary | 5.32E-08   | -6.58E-05 | 0.663123 | other          | 0          |
| <i>CXCR4</i>    | Pituitary | 1.86E-07   | -0.00074  | 5.13E-08 | decreasing     | 0          |
| <i>DAG1</i>     | Pituitary | 9.40E-08   | -0.00053  | 0.000138 | other          | 0          |
| <i>DCBLD2</i>   | Pituitary | 7.70E-08   | -0.00059  | 1.35E-05 | decreasing     | 0          |
| <i>DCTN1</i>    | Pituitary | 1.27E-07   | 0.000595  | 1.06E-05 | increasing     | 0          |
| <i>DDX24</i>    | Pituitary | 1.59E-07   | 0.000528  | 0.000128 | other          | 0          |
| <i>DDX27</i>    | Pituitary | 7.21E-08   | 0.00032   | 0.030538 | other          | 0          |
| <i>DDX6</i>     | Pituitary | 1.66E-07   | -2.32E-05 | 0.879538 | other          | 1          |
| <i>DENND2D</i>  | Pituitary | 5.00E-09   | 0.000668  | 3.84E-07 | increasing     | 0          |
| <i>DENND3</i>   | Pituitary | 1.29E-09   | 0.000705  | 8.30E-08 | increasing     | 0          |
| <i>DENND5A</i>  | Pituitary | 8.42E-08   | -0.00061  | 6.31E-06 | decreasing     | 0          |
| <i>DENND6A</i>  | Pituitary | 4.48E-10   | -0.00033  | 0.025838 | other          | 0          |
| <i>DGKD</i>     | Pituitary | 9.80E-08   | 0.000646  | 4.04E-06 | increasing     | 0          |
| <i>DGKI</i>     | Pituitary | 2.89E-08   | 0.000701  | 6.67E-08 | increasing     | 0          |
| <i>DGKK</i>     | Pituitary | 4.96E-12   | -0.00078  | 5.47E-10 | decreasing     | 0          |
| <i>DIAPH3</i>   | Pituitary | 2.44E-10   | -0.00066  | 1.56E-06 | decreasing     | 0          |
| <i>DLGAP3</i>   | Pituitary | 5.65E-08   | 0.000729  | 1.23E-08 | increasing     | 0          |
| <i>DLGAP5</i>   | Pituitary | 1.57E-13   | -0.00072  | 1.66E-08 | decreasing     | 0          |
| <i>DMGDH</i>    | Pituitary | 6.17E-13   | 0.000831  | 9.29E-11 | increasing     | 0          |
| <i>DNAJB13</i>  | Pituitary | 7.13E-08   | -0.00067  | 4.18E-07 | decreasing     | 0          |

**Supplementary Table 9. Genes with a significant age effect from either ANOVA or linear regression. Beta is the regression coefficient, Pval is the p-value for the regression coefficient of expression on age (in days). Effect category is increasing if beta is positive and significant, decreasing if beta is negative and significant, and other if the ANOVA were significant rather than the linear regression. Local eQTL is 1 if the gene had a significant local eQTL**

| Gene            | Tissue    | Anova.pval | Beta      | Pval     | EffectCategory | Local eQTL |
|-----------------|-----------|------------|-----------|----------|----------------|------------|
| <i>DOC2A</i>    | Pituitary | 1.94E-08   | 0.000537  | 0.000197 | other          | 0          |
| <i>DOCK3</i>    | Pituitary | 2.37E-09   | 0.000525  | 0.000207 | other          | 0          |
| <i>DOK6</i>     | Pituitary | 5.00E-08   | -0.00062  | 8.53E-06 | decreasing     | 0          |
| <i>DSG2</i>     | Pituitary | 2.83E-09   | -0.00068  | 5.66E-07 | decreasing     | 0          |
| <i>DTX4</i>     | Pituitary | 3.63E-07   | -0.00073  | 1.27E-08 | decreasing     | 0          |
| <i>DUSP10</i>   | Pituitary | 2.73E-13   | -0.0007   | 4.17E-07 | decreasing     | 0          |
| <i>E2F1</i>     | Pituitary | 3.04E-12   | -0.00069  | 2.36E-07 | decreasing     | 0          |
| <i>E2F3</i>     | Pituitary | 1.80E-08   | -0.00013  | 0.385425 | other          | 0          |
| <i>E2F8</i>     | Pituitary | 8.94E-11   | -0.00071  | 4.07E-08 | decreasing     | 0          |
| <i>EBF4</i>     | Pituitary | 7.84E-08   | -0.00062  | 7.67E-06 | decreasing     | 0          |
| <i>ELOVL2</i>   | Pituitary | 3.60E-09   | -0.0007   | 7.06E-08 | decreasing     | 0          |
| <i>EME2</i>     | Pituitary | 1.24E-07   | 0.000414  | 0.003411 | other          | 0          |
| <i>EMP1</i>     | Pituitary | 7.36E-10   | -0.00074  | 6.78E-09 | decreasing     | 0          |
| <i>ENPP2</i>    | Pituitary | 2.38E-09   | -0.00077  | 1.40E-09 | decreasing     | 0          |
| <i>EPC1</i>     | Pituitary | 7.92E-08   | -0.00037  | 0.014335 | other          | 0          |
| <i>EPDR1</i>    | Pituitary | 5.31E-08   | 0.000313  | 0.029777 | other          | 0          |
| <i>EPHA1</i>    | Pituitary | 1.06E-07   | 0.000653  | 7.89E-07 | increasing     | 0          |
| <i>ERGIC3</i>   | Pituitary | 2.38E-07   | -0.00055  | 5.99E-05 | decreasing     | 0          |
| <i>ESPL1</i>    | Pituitary | 8.82E-08   | -0.00056  | 5.53E-05 | decreasing     | 0          |
| <i>ESYT3</i>    | Pituitary | 2.14E-09   | 0.000511  | 0.000225 | other          | 0          |
| <i>EXO1</i>     | Pituitary | 1.62E-11   | -0.00056  | 5.53E-05 | decreasing     | 0          |
| <i>EXOC2</i>    | Pituitary | 1.79E-05   | 0.000696  | 8.67E-08 | increasing     | 0          |
| <i>EZH1</i>     | Pituitary | 2.53E-08   | 0.0002    | 0.180289 | other          | 0          |
| <i>EZH2</i>     | Pituitary | 8.99E-10   | -0.00077  | 8.92E-09 | decreasing     | 0          |
| <i>FADS2</i>    | Pituitary | 1.99E-07   | -0.00068  | 2.14E-07 | decreasing     | 0          |
| <i>FAM107B</i>  | Pituitary | 4.93E-09   | -0.00078  | 3.59E-10 | decreasing     | 0          |
| <i>FAM171A1</i> | Pituitary | 2.24E-07   | -0.00025  | 0.08909  | other          | 0          |
| <i>FAM49A</i>   | Pituitary | 1.86E-07   | -8.63E-05 | 0.571467 | other          | 0          |
| <i>FAM64A</i>   | Pituitary | 3.49E-09   | -0.00057  | 4.34E-05 | decreasing     | 0          |
| <i>FANCI</i>    | Pituitary | 3.49E-08   | -0.00052  | 0.000236 | other          | 0          |
| <i>FBN2</i>     | Pituitary | 3.29E-10   | -0.00068  | 1.64E-07 | decreasing     | 1          |
| <i>FBXL7</i>    | Pituitary | 2.19E-14   | -0.00086  | 3.25E-13 | decreasing     | 0          |
| <i>FCHSD2</i>   | Pituitary | 1.43E-09   | 0.000549  | 0.000133 | other          | 0          |
| <i>FGF1</i>     | Pituitary | 7.71E-08   | 0.000152  | 0.299614 | other          | 0          |
| <i>FGF9</i>     | Pituitary | 9.34E-08   | -0.00047  | 0.00145  | other          | 0          |
| <i>FILIP1</i>   | Pituitary | 5.10E-08   | 9.96E-05  | 0.512384 | other          | 0          |
| <i>FLRT3</i>    | Pituitary | 9.49E-08   | -0.00029  | 0.044883 | other          | 0          |
| <i>FOXP2</i>    | Pituitary | 1.25E-09   | -0.0002   | 0.185594 | other          | 0          |
| <i>FOXP1</i>    | Pituitary | 6.05E-10   | 0.000186  | 0.216935 | other          | 1          |
| <i>FRMD4A</i>   | Pituitary | 2.66E-07   | -0.00072  | 1.97E-08 | decreasing     | 0          |



**Supplementary Table 9. Genes with a significant age effect from either ANOVA or linear regression. Beta is the regression coefficient, Pval is the p-value for the regression coefficient of expression on age (in days). Effect category is increasing if beta is positive and significant, decreasing if beta is negative and significant, and other if the ANOVA were significant rather than the linear regression. Local eQTL is 1 if the gene had a significant local eQTL**

| Gene           | Tissue    | Anova.pval | Beta     | Pval     | EffectCategory | Local eQTL |
|----------------|-----------|------------|----------|----------|----------------|------------|
| <i>FRRS1L</i>  | Pituitary | 1.93E-07   | 0.000557 | 4.57E-05 | increasing     | 0          |
| <i>FSTL1</i>   | Pituitary | 1.94E-12   | -0.00064 | 1.29E-06 | decreasing     | 0          |
| <i>FUT8</i>    | Pituitary | 8.11E-10   | -0.00063 | 6.41E-06 | decreasing     | 0          |
| <i>FUT9</i>    | Pituitary | 2.77E-09   | -0.00077 | 6.20E-10 | decreasing     | 0          |
| <i>GABRD</i>   | Pituitary | 5.96E-07   | 0.000761 | 1.09E-08 | increasing     | 0          |
| <i>GAREML</i>  | Pituitary | 5.17E-08   | -0.00066 | 1.24E-06 | decreasing     | 0          |
| <i>GBE1</i>    | Pituitary | 8.28E-09   | 0.000652 | 2.72E-06 | increasing     | 0          |
| <i>GBGT1</i>   | Pituitary | 1.04E-09   | 0.000651 | 1.95E-06 | increasing     | 0          |
| <i>GDPD1</i>   | Pituitary | 7.59E-09   | -0.00054 | 8.96E-05 | decreasing     | 0          |
| <i>GFOD1</i>   | Pituitary | 9.88E-06   | 0.00072  | 9.25E-08 | increasing     | 0          |
| <i>GHR</i>     | Pituitary | 5.18E-12   | -0.00074 | 7.62E-09 | decreasing     | 0          |
| <i>GML</i>     | Pituitary | 1.58E-07   | -0.00055 | 6.59E-05 | decreasing     | 0          |
| <i>GNAL</i>    | Pituitary | 1.04E-09   | 0.000736 | 8.32E-09 | increasing     | 0          |
| <i>GOLGA2</i>  | Pituitary | 3.83E-08   | 0.000472 | 0.00074  | other          | 0          |
| <i>GPC3</i>    | Pituitary | 9.32E-07   | -0.00073 | 9.47E-09 | decreasing     | 0          |
| <i>GPNMB</i>   | Pituitary | 1.11E-07   | 0.000329 | 0.028274 | other          | 0          |
| <i>GPR37</i>   | Pituitary | 3.41E-08   | -0.00064 | 1.82E-06 | decreasing     | 0          |
| <i>GPR61</i>   | Pituitary | 1.45E-10   | 0.000744 | 5.01E-09 | increasing     | 0          |
| <i>GPR64</i>   | Pituitary | 2.43E-07   | -0.00068 | 1.70E-07 | decreasing     | 0          |
| <i>GPRASP1</i> | Pituitary | 1.67E-07   | 0.000583 | 2.87E-05 | increasing     | 0          |
| <i>GPSM2</i>   | Pituitary | 1.31E-09   | -0.00063 | 2.68E-06 | decreasing     | 0          |
| <i>GPX7</i>    | Pituitary | 8.63E-10   | -0.0007  | 8.81E-08 | decreasing     | 0          |
| <i>GRB7</i>    | Pituitary | 1.29E-09   | -0.00082 | 1.91E-10 | decreasing     | 0          |
| <i>GRIN1</i>   | Pituitary | 1.35E-07   | 0.00036  | 0.014831 | other          | 0          |
| <i>GTDC1</i>   | Pituitary | 1.77E-13   | -0.00077 | 5.19E-09 | decreasing     | 0          |
| <i>GTSE1</i>   | Pituitary | 1.13E-08   | -0.00035 | 0.018126 | other          | 0          |
| <i>H3F3B</i>   | Pituitary | 8.42E-07   | -0.0007  | 2.06E-07 | decreasing     | 0          |
| <i>HERC3</i>   | Pituitary | 5.16E-08   | 0.000618 | 1.10E-05 | increasing     | 0          |
| <i>HEY1</i>    | Pituitary | 4.36E-06   | -0.00069 | 1.04E-07 | decreasing     | 1          |
| <i>HIF1AN</i>  | Pituitary | 1.18E-07   | 0.000579 | 2.02E-05 | increasing     | 0          |
| <i>HJURP</i>   | Pituitary | 1.38E-11   | -0.00079 | 1.40E-10 | decreasing     | 0          |
| <i>HMGA2</i>   | Pituitary | 1.02E-11   | -0.00055 | 9.95E-05 | decreasing     | 0          |
| <i>HMGB2</i>   | Pituitary | 8.34E-10   | -0.00071 | 5.42E-08 | decreasing     | 0          |
| <i>HMMR</i>    | Pituitary | 9.97E-10   | -0.00064 | 2.60E-06 | decreasing     | 0          |
| <i>HPGD</i>    | Pituitary | 1.78E-08   | 0.000453 | 0.00146  | other          | 0          |
| <i>HPSE2</i>   | Pituitary | 1.40E-13   | 0.00084  | 1.12E-11 | increasing     | 0          |
| <i>HS6ST3</i>  | Pituitary | 2.86E-08   | 0.000774 | 6.30E-10 | increasing     | 0          |
| <i>HSF4</i>    | Pituitary | 7.76E-10   | 0.000579 | 1.97E-05 | increasing     | 0          |
| <i>HSPA12A</i> | Pituitary | 1.31E-09   | 0.000709 | 2.13E-07 | increasing     | 0          |
| <i>HSPA12B</i> | Pituitary | 2.07E-07   | 4.90E-05 | 0.748949 | other          | 0          |

**Supplementary Table 9. Genes with a significant age effect from either ANOVA or linear regression. Beta is the regression coefficient, Pval is the p-value for the regression coefficient of expression on age (in days). Effect category is increasing if beta is positive and significant, decreasing if beta is negative and significant, and other if the ANOVA were significant rather than the linear regression. Local eQTL is 1 if the gene had a significant local eQTL**

| Gene            | Tissue    | Anova.pval | Beta     | Pval     | EffectCategory | Local eQTL |
|-----------------|-----------|------------|----------|----------|----------------|------------|
| <i>HTR2C</i>    | Pituitary | 3.36E-09   | -0.00067 | 2.83E-07 | decreasing     | 0          |
| <i>ID2</i>      | Pituitary | 3.96E-07   | -0.00072 | 1.45E-07 | decreasing     | 0          |
| <i>IDH2</i>     | Pituitary | 3.87E-06   | -0.0007  | 7.38E-08 | decreasing     | 0          |
| <i>IGF2BP2</i>  | Pituitary | 3.89E-19   | -0.00074 | 1.89E-08 | decreasing     | 0          |
| <i>IGF2BP3</i>  | Pituitary | 8.72E-14   | -0.00071 | 1.51E-07 | decreasing     | 1          |
| <i>IGSF9</i>    | Pituitary | 3.17E-08   | -0.00073 | 1.35E-08 | decreasing     | 0          |
| <i>IL12RB2</i>  | Pituitary | 1.73E-10   | 0.000669 | 3.67E-07 | increasing     | 0          |
| <i>IMPAD1</i>   | Pituitary | 2.31E-07   | 0.000108 | 0.478114 | other          | 0          |
| <i>INPP5B</i>   | Pituitary | 8.39E-08   | 0.000625 | 8.67E-06 | increasing     | 0          |
| <i>INSM2</i>    | Pituitary | 3.80E-08   | -0.00047 | 0.000706 | other          | 0          |
| <i>IQGAP3</i>   | Pituitary | 1.75E-14   | -0.00069 | 1.25E-07 | decreasing     | 0          |
| <i>IQSEC1</i>   | Pituitary | 6.79E-06   | 0.000699 | 1.54E-07 | increasing     | 0          |
| <i>IRAK1BP1</i> | Pituitary | 2.82E-09   | -0.00033 | 0.025494 | other          | 0          |
| <i>IVD</i>      | Pituitary | 2.30E-07   | 0.00049  | 0.000784 | other          | 0          |
| <i>JADE2</i>    | Pituitary | 1.80E-10   | 0.000765 | 3.86E-09 | increasing     | 0          |
| <i>KCNJ16</i>   | Pituitary | 1.57E-08   | -0.00058 | 1.88E-05 | decreasing     | 0          |
| <i>KCNK4</i>    | Pituitary | 4.04E-09   | 8.03E-05 | 0.597249 | other          | 0          |
| <i>KCNMB2</i>   | Pituitary | 2.27E-07   | -0.00057 | 3.16E-05 | decreasing     | 1          |
| <i>KCNMB4</i>   | Pituitary | 7.91E-08   | -0.00074 | 4.57E-08 | decreasing     | 0          |
| <i>KIAA0101</i> | Pituitary | 1.49E-10   | -0.00065 | 1.39E-06 | decreasing     | 0          |
| <i>KIF11</i>    | Pituitary | 3.68E-09   | -0.00066 | 1.01E-06 | decreasing     | 0          |
| <i>KIF14</i>    | Pituitary | 1.33E-12   | -0.00066 | 1.02E-06 | decreasing     | 0          |
| <i>KIF15</i>    | Pituitary | 7.87E-11   | -0.00065 | 1.28E-06 | decreasing     | 0          |
| <i>KIF18A</i>   | Pituitary | 3.70E-09   | -0.00065 | 1.69E-06 | decreasing     | 0          |
| <i>KIF18B</i>   | Pituitary | 1.01E-10   | -0.00063 | 4.46E-06 | decreasing     | 0          |
| <i>KIF20A</i>   | Pituitary | 7.11E-12   | -0.0007  | 5.52E-08 | decreasing     | 0          |
| <i>KIF22</i>    | Pituitary | 2.40E-07   | -0.00032 | 0.030378 | other          | 0          |
| <i>KIF23</i>    | Pituitary | 4.40E-12   | -0.00076 | 1.43E-09 | decreasing     | 0          |
| <i>KIF24</i>    | Pituitary | 2.47E-08   | -0.00063 | 3.31E-06 | decreasing     | 0          |
| <i>KIF4A</i>    | Pituitary | 5.40E-08   | -0.00049 | 0.000419 | other          | 0          |
| <i>KIFC1</i>    | Pituitary | 3.81E-12   | -0.00073 | 1.32E-08 | decreasing     | 0          |
| <i>KLF11</i>    | Pituitary | 6.24E-09   | -0.00072 | 7.62E-08 | decreasing     | 0          |
| <i>KLF9</i>     | Pituitary | 4.08E-07   | -0.0007  | 2.24E-07 | decreasing     | 0          |
| <i>KLHL35</i>   | Pituitary | 3.38E-08   | 9.22E-06 | 0.949937 | other          | 0          |
| <i>KNSTRN</i>   | Pituitary | 5.95E-08   | -0.00053 | 0.000227 | other          | 0          |
| <i>KRT222</i>   | Pituitary | 1.44E-08   | 0.000616 | 4.32E-06 | increasing     | 0          |
| <i>L3MBTL4</i>  | Pituitary | 3.11E-06   | 0.000691 | 1.16E-07 | increasing     | 0          |
| <i>LAMP5</i>    | Pituitary | 1.21E-07   | 0.000655 | 7.23E-07 | increasing     | 0          |
| <i>LARGE</i>    | Pituitary | 1.96E-07   | 0.000133 | 0.37348  | other          | 0          |
| <i>LCTL</i>     | Pituitary | 6.70E-09   | 0.000566 | 7.12E-05 | increasing     | 0          |

**Supplementary Table 9. Genes with a significant age effect from either ANOVA or linear regression. Beta is the regression coefficient, Pval is the p-value for the regression coefficient of expression on age (in days). Effect category is increasing if beta is positive and significant, decreasing if beta is negative and significant, and other if the ANOVA were significant rather than the linear regression. Local eQTL is 1 if the gene had a significant local eQTL**

| Gene                | Tissue    | Anova.pval | Beta      | Pval     | EffectCategory | Local eQTL |
|---------------------|-----------|------------|-----------|----------|----------------|------------|
| <i>LEPRE1</i>       | Pituitary | 1.89E-07   | 0.000109  | 0.473458 | other          | 0          |
| <i>LHB</i>          | Pituitary | 9.19E-09   | 0.000586  | 2.04E-05 | increasing     | 0          |
| <i>LHX1</i>         | Pituitary | 9.37E-11   | 0.000777  | 5.69E-10 | increasing     | 0          |
| <i>LMNB1</i>        | Pituitary | 1.54E-10   | -0.00073  | 2.82E-08 | decreasing     | 0          |
| <i>LOC103214618</i> | Pituitary | 1.50E-07   | -8.53E-05 | 0.574564 | other          | 0          |
| <i>LOC103214631</i> | Pituitary | 1.42E-11   | -0.00076  | 2.09E-09 | decreasing     | 0          |
| <i>LOC103214728</i> | Pituitary | 1.96E-07   | -0.00019  | 0.201796 | other          | 0          |
| <i>LOC103215200</i> | Pituitary | 3.20E-08   | 0.000771  | 2.09E-09 | increasing     | 0          |
| <i>LOC103216175</i> | Pituitary | 1.78E-10   | -0.00071  | 4.31E-08 | decreasing     | 0          |
| <i>LOC103217048</i> | Pituitary | 1.98E-07   | -0.00019  | 0.195206 | other          | 0          |
| <i>LOC103217216</i> | Pituitary | 2.21E-07   | -0.00068  | 4.96E-07 | decreasing     | 0          |
| <i>LOC103217305</i> | Pituitary | 8.86E-09   | 0.000221  | 0.146041 | other          | 0          |
| <i>LOC103218075</i> | Pituitary | 8.60E-11   | 0.000589  | 1.78E-05 | increasing     | 0          |
| <i>LOC103218076</i> | Pituitary | 3.13E-10   | 0.000486  | 0.00048  | other          | 0          |
| <i>LOC103218277</i> | Pituitary | 1.71E-07   | 0.000512  | 0.000367 | other          | 0          |
| <i>LOC103218335</i> | Pituitary | 3.34E-11   | 0.000442  | 0.001678 | other          | 0          |
| <i>LOC103218411</i> | Pituitary | 2.94E-16   | -0.00086  | 2.83E-13 | decreasing     | 0          |
| <i>LOC103218542</i> | Pituitary | 2.63E-08   | 0.000589  | 3.08E-05 | increasing     | 0          |
| <i>LOC103219103</i> | Pituitary | 3.54E-08   | 8.92E-05  | 0.495257 | other          | 0          |
| <i>LOC103219120</i> | Pituitary | 3.54E-10   | -0.00068  | 7.66E-07 | decreasing     | 0          |
| <i>LOC103219315</i> | Pituitary | 1.14E-07   | -0.00018  | 0.238379 | other          | 0          |
| <i>LOC103219354</i> | Pituitary | 3.44E-11   | 0.000795  | 1.26E-10 | increasing     | 0          |
| <i>LOC103219428</i> | Pituitary | 2.13E-07   | 0.000403  | 0.005925 | other          | 0          |
| <i>LOC103219460</i> | Pituitary | 1.28E-09   | -0.00069  | 2.14E-07 | decreasing     | 0          |
| <i>LOC103219462</i> | Pituitary | 5.11E-08   | 5.09E-05  | 0.73726  | other          | 0          |
| <i>LOC103219590</i> | Pituitary | 1.77E-07   | -0.00037  | 0.001841 | other          | 0          |
| <i>LOC103219792</i> | Pituitary | 1.09E-06   | 0.000687  | 1.41E-07 | increasing     | 0          |
| <i>LOC103219855</i> | Pituitary | 4.87E-08   | -0.00074  | 5.39E-09 | decreasing     | 0          |
| <i>LOC103219911</i> | Pituitary | 1.02E-07   | 0.000627  | 8.85E-06 | increasing     | 0          |
| <i>LOC103219975</i> | Pituitary | 1.79E-07   | -1.01E-05 | 0.945764 | other          | 0          |
| <i>LOC103220165</i> | Pituitary | 3.31E-08   | -2.11E-05 | 0.889454 | other          | 0          |
| <i>LOC103220998</i> | Pituitary | 4.00E-08   | -9.57E-05 | 0.531582 | other          | 0          |
| <i>LOC103221024</i> | Pituitary | 1.05E-07   | -0.0006   | 2.14E-05 | decreasing     | 0          |
| <i>LOC103221138</i> | Pituitary | 4.79E-09   | 0.000604  | 1.55E-05 | increasing     | 1          |
| <i>LOC103221174</i> | Pituitary | 7.60E-08   | -9.88E-05 | 0.51972  | other          | 0          |
| <i>LOC103221872</i> | Pituitary | 6.93E-08   | -6.92E-05 | 0.651738 | other          | 0          |
| <i>LOC103221955</i> | Pituitary | 1.78E-06   | -0.00071  | 2.47E-07 | decreasing     | 0          |
| <i>LOC103222369</i> | Pituitary | 3.34E-08   | -0.00038  | 0.011209 | other          | 0          |
| <i>LOC103222606</i> | Pituitary | 3.32E-08   | 0.000158  | 0.278407 | other          | 0          |
| <i>LOC103222782</i> | Pituitary | 2.19E-07   | -0.00055  | 8.81E-05 | decreasing     | 0          |

**Supplementary Table 9. Genes with a significant age effect from either ANOVA or linear regression. Beta is the regression coefficient, Pval is the p-value for the regression coefficient of expression on age (in days). Effect category is increasing if beta is positive and significant, decreasing if beta is negative and significant, and other if the ANOVA were significant rather than the linear regression. Local eQTL is 1 if the gene had a significant local eQTL**

| Gene         | Tissue    | Anova.pval | Beta      | Pval     | EffectCategory | Local eQTL |
|--------------|-----------|------------|-----------|----------|----------------|------------|
| LOC103222981 | Pituitary | 2.47E-09   | 0.000738  | 4.26E-08 | increasing     | 0          |
| LOC103222983 | Pituitary | 4.55E-09   | 0.000764  | 1.09E-08 | increasing     | 0          |
| LOC103223289 | Pituitary | 8.27E-08   | -0.00067  | 1.77E-06 | decreasing     | 0          |
| LOC103223587 | Pituitary | 9.21E-08   | -0.00073  | 5.96E-08 | decreasing     | 0          |
| LOC103224129 | Pituitary | 2.46E-07   | -0.00055  | 7.53E-05 | decreasing     | 0          |
| LOC103224287 | Pituitary | 3.04E-08   | 0.000694  | 9.53E-08 | increasing     | 0          |
| LOC103224472 | Pituitary | 7.86E-08   | 9.61E-05  | 0.527648 | other          | 0          |
| LOC103225055 | Pituitary | 2.71E-08   | -0.00014  | 0.345271 | other          | 0          |
| LOC103225142 | Pituitary | 9.18E-09   | 0.000201  | 0.180355 | other          | 0          |
| LOC103225340 | Pituitary | 6.65E-09   | -0.00016  | 0.296274 | other          | 0          |
| LOC103225920 | Pituitary | 2.65E-08   | 0.000628  | 2.60E-06 | increasing     | 0          |
| LOC103225927 | Pituitary | 1.53E-08   | 0.000536  | 0.00021  | other          | 0          |
| LOC103226240 | Pituitary | 1.76E-09   | -0.00069  | 1.32E-07 | decreasing     | 1          |
| LOC103226832 | Pituitary | 7.26E-08   | -0.00019  | 0.19036  | other          | 0          |
| LOC103227289 | Pituitary | 1.28E-07   | -0.00036  | 0.010676 | other          | 0          |
| LOC103227374 | Pituitary | 2.06E-09   | -2.63E-05 | 0.860944 | other          | 0          |
| LOC103227574 | Pituitary | 6.38E-08   | 5.42E-05  | 0.722817 | other          | 0          |
| LOC103227729 | Pituitary | 1.88E-07   | 9.88E-05  | 0.518053 | other          | 0          |
| LOC103228401 | Pituitary | 3.93E-12   | -0.00026  | 0.081612 | other          | 0          |
| LOC103228968 | Pituitary | 6.43E-09   | -0.00055  | 5.62E-05 | decreasing     | 0          |
| LOC103229111 | Pituitary | 1.34E-07   | -0.00051  | 0.000396 | other          | 0          |
| LOC103229159 | Pituitary | 7.55E-08   | 8.33E-05  | 0.587156 | other          | 0          |
| LOC103229280 | Pituitary | 8.16E-08   | -0.00024  | 0.107457 | other          | 0          |
| LOC103229506 | Pituitary | 6.06E-08   | -0.00041  | 0.00589  | other          | 0          |
| LOC103230251 | Pituitary | 6.26E-08   | -0.00012  | 0.436205 | other          | 0          |
| LOC103230509 | Pituitary | 1.83E-07   | 0.000206  | 0.156064 | other          | 0          |
| LOC103231548 | Pituitary | 6.61E-15   | -0.00081  | 4.56E-11 | decreasing     | 0          |
| LOC103231594 | Pituitary | 7.50E-09   | -0.00076  | 1.34E-09 | decreasing     | 0          |
| LOC103231881 | Pituitary | 1.45E-07   | -0.00028  | 0.06546  | other          | 0          |
| LOC103231992 | Pituitary | 4.28E-09   | -0.00056  | 5.97E-05 | decreasing     | 0          |
| LOC103232002 | Pituitary | 1.18E-07   | -0.00064  | 1.28E-06 | decreasing     | 0          |
| LOC103232225 | Pituitary | 4.77E-09   | 0.000542  | 7.95E-05 | increasing     | 0          |
| LOC103232226 | Pituitary | 2.34E-08   | -0.0003   | 0.038708 | other          | 0          |
| LOC103232245 | Pituitary | 8.52E-08   | -0.00031  | 0.035828 | other          | 0          |
| LOC103232333 | Pituitary | 1.47E-07   | -9.65E-05 | 0.529292 | other          | 0          |
| LOC103232555 | Pituitary | 7.00E-08   | 0.000164  | 0.284849 | other          | 0          |
| LOC103232871 | Pituitary | 1.19E-07   | 2.79E-06  | 0.98538  | other          | 0          |
| LOC103232947 | Pituitary | 1.15E-07   | -0.00019  | 0.197767 | other          | 0          |
| LOC103232983 | Pituitary | 2.34E-07   | -0.00066  | 8.95E-07 | decreasing     | 0          |
| LOC103233707 | Pituitary | 6.64E-08   | -0.0008   | 1.19E-09 | decreasing     | 0          |

**Supplementary Table 9. Genes with a significant age effect from either ANOVA or linear regression. Beta is the regression coefficient, Pval is the p-value for the regression coefficient of expression on age (in days). Effect category is increasing if beta is positive and significant, decreasing if beta is negative and significant, and other if the ANOVA were significant rather than the linear regression. Local eQTL is 1 if the gene had a significant local eQTL**

| Gene         | Tissue    | Anova.pval | Beta      | Pval     | EffectCategory | Local eQTL |
|--------------|-----------|------------|-----------|----------|----------------|------------|
| LOC103234108 | Pituitary | 1.09E-07   | 0.000535  | 3.96E-08 | increasing     | 0          |
| LOC103234274 | Pituitary | 8.56E-11   | -0.00068  | 1.63E-07 | decreasing     | 0          |
| LOC103234284 | Pituitary | 1.32E-07   | -0.00069  | 3.88E-07 | decreasing     | 0          |
| LOC103235307 | Pituitary | 8.57E-07   | -0.00074  | 1.99E-08 | decreasing     | 0          |
| LOC103235309 | Pituitary | 9.64E-08   | -0.00059  | 1.46E-05 | decreasing     | 0          |
| LOC103235467 | Pituitary | 1.39E-07   | 0.000171  | 0.261698 | other          | 0          |
| LOC103236002 | Pituitary | 1.17E-07   | -0.00028  | 0.057752 | other          | 0          |
| LOC103236199 | Pituitary | 9.03E-13   | -0.0008   | 1.41E-10 | decreasing     | 0          |
| LOC103236243 | Pituitary | 3.37E-09   | -0.00015  | 0.317606 | other          | 0          |
| LOC103236840 | Pituitary | 6.21E-08   | 0.000354  | 0.013291 | other          | 0          |
| LOC103236916 | Pituitary | 2.49E-07   | 0.00045   | 0.001552 | other          | 0          |
| LOC103237276 | Pituitary | 9.40E-08   | 0.000171  | 0.2624   | other          | 0          |
| LOC103237807 | Pituitary | 1.39E-07   | 0.000276  | 0.066719 | other          | 1          |
| LOC103238262 | Pituitary | 7.66E-07   | -0.00069  | 2.40E-07 | decreasing     | 1          |
| LOC103238634 | Pituitary | 1.63E-07   | -3.22E-05 | 0.826266 | other          | 0          |
| LOC103238842 | Pituitary | 8.91E-09   | -7.52E-05 | 0.620709 | other          | 0          |
| LOC103238939 | Pituitary | 1.43E-07   | -2.02E-05 | 0.893057 | other          | 0          |
| LOC103239026 | Pituitary | 2.43E-07   | -0.00051  | 0.000473 | other          | 0          |
| LOC103239517 | Pituitary | 1.75E-07   | 7.52E-05  | 0.622125 | other          | 0          |
| LOC103239658 | Pituitary | 2.44E-09   | 0.00016   | 0.280692 | other          | 0          |
| LOC103239792 | Pituitary | 3.44E-09   | 4.13E-05  | 0.785355 | other          | 0          |
| LOC103239878 | Pituitary | 2.21E-09   | -6.47E-05 | 0.670011 | other          | 0          |
| LOC103240211 | Pituitary | 1.21E-07   | 3.83E-05  | 0.803313 | other          | 0          |
| LOC103240224 | Pituitary | 1.63E-07   | -0.0002   | 0.163017 | other          | 0          |
| LOC103240328 | Pituitary | 5.79E-08   | -9.03E-05 | 0.551426 | other          | 0          |
| LOC103240641 | Pituitary | 1.77E-11   | -0.00064  | 1.56E-06 | decreasing     | 0          |
| LOC103240855 | Pituitary | 2.52E-08   | 0.000142  | 0.331933 | other          | 0          |
| LOC103241031 | Pituitary | 3.81E-08   | 9.78E-05  | 0.522686 | other          | 0          |
| LOC103241174 | Pituitary | 3.20E-08   | -0.00049  | 0.000392 | other          | 0          |
| LOC103241267 | Pituitary | 4.04E-08   | 0.000723  | 1.84E-08 | increasing     | 0          |
| LOC103241849 | Pituitary | 6.15E-08   | -0.00057  | 2.94E-05 | decreasing     | 0          |
| LOC103241853 | Pituitary | 2.76E-08   | 0.00039   | 0.006704 | other          | 0          |
| LOC103241917 | Pituitary | 5.03E-08   | 4.72E-05  | 0.758372 | other          | 0          |
| LOC103242103 | Pituitary | 1.17E-09   | 0.000454  | 0.001522 | other          | 0          |
| LOC103242222 | Pituitary | 9.12E-08   | -0.00051  | 0.000509 | other          | 0          |
| LOC103242242 | Pituitary | 1.84E-07   | 0.000699  | 7.38E-08 | increasing     | 1          |
| LOC103242515 | Pituitary | 1.52E-09   | 0.00069   | 5.09E-07 | increasing     | 0          |
| LOC103243079 | Pituitary | 4.22E-10   | 0.000743  | 2.37E-08 | increasing     | 0          |
| LOC103243406 | Pituitary | 4.49E-08   | -0.00018  | 0.227996 | other          | 0          |
| LOC103243446 | Pituitary | 3.31E-08   | -0.00071  | 1.46E-07 | decreasing     | 0          |

**Supplementary Table 9. Genes with a significant age effect from either ANOVA or linear regression. Beta is the regression coefficient, Pval is the p-value for the regression coefficient of expression on age (in days). Effect category is increasing if beta is positive and significant, decreasing if beta is negative and significant, and other if the ANOVA were significant rather than the linear regression. Local eQTL is 1 if the gene had a significant local eQTL**

| Gene                | Tissue    | Anova.pval | Beta      | Pval     | EffectCategory | Local eQTL |
|---------------------|-----------|------------|-----------|----------|----------------|------------|
| <i>LOC103243499</i> | Pituitary | 4.51E-08   | 0.000253  | 0.081332 | other          | 0          |
| <i>LOC103243892</i> | Pituitary | 6.62E-08   | -0.00075  | 2.50E-08 | decreasing     | 0          |
| <i>LOC103243906</i> | Pituitary | 2.45E-08   | -0.00018  | 0.212245 | other          | 0          |
| <i>LOC103243977</i> | Pituitary | 1.22E-07   | -0.00061  | 1.48E-05 | decreasing     | 0          |
| <i>LOC103244172</i> | Pituitary | 8.41E-09   | -8.62E-05 | 0.571624 | other          | 0          |
| <i>LOC103244309</i> | Pituitary | 8.66E-09   | -4.57E-05 | 0.764355 | other          | 0          |
| <i>LOC103244593</i> | Pituitary | 2.60E-07   | -0.00026  | 0.068328 | other          | 0          |
| <i>LOC103244645</i> | Pituitary | 5.48E-10   | 0.000742  | 5.57E-09 | increasing     | 0          |
| <i>LOC103244685</i> | Pituitary | 5.89E-08   | 0.000685  | 2.40E-07 | increasing     | 0          |
| <i>LOC103244696</i> | Pituitary | 5.59E-10   | 0.000788  | 1.20E-09 | increasing     | 0          |
| <i>LOC103245138</i> | Pituitary | 1.36E-12   | 0.000698  | 2.97E-07 | increasing     | 0          |
| <i>LOC103245179</i> | Pituitary | 2.10E-07   | 0.000554  | 0.000114 | other          | 1          |
| <i>LOC103245450</i> | Pituitary | 2.28E-08   | 5.80E-05  | 0.705125 | other          | 0          |
| <i>LOC103245680</i> | Pituitary | 9.49E-08   | -0.00027  | 0.071303 | other          | 0          |
| <i>LOC103246064</i> | Pituitary | 7.73E-08   | -0.00068  | 2.17E-07 | decreasing     | 0          |
| <i>LOC103246132</i> | Pituitary | 6.84E-08   | -5.32E-05 | 0.728237 | other          | 0          |
| <i>LOC103246527</i> | Pituitary | 3.32E-08   | -0.0002   | 0.170428 | other          | 1          |
| <i>LOC103246578</i> | Pituitary | 1.33E-07   | 0.000607  | 1.13E-05 | increasing     | 0          |
| <i>LOC103246876</i> | Pituitary | 8.57E-08   | -0.00063  | 7.47E-06 | decreasing     | 0          |
| <i>LOC103248222</i> | Pituitary | 7.68E-08   | -4.11E-05 | 0.788388 | other          | 0          |
| <i>LPAR4</i>        | Pituitary | 7.98E-09   | -0.00074  | 8.28E-09 | decreasing     | 0          |
| <i>LPIN1</i>        | Pituitary | 1.27E-07   | 0.000594  | 1.74E-05 | increasing     | 0          |
| <i>LRAT</i>         | Pituitary | 7.08E-08   | 0.000532  | 0.000242 | other          | 0          |
| <i>LRRC10B</i>      | Pituitary | 1.51E-07   | 0.000469  | 0.000807 | other          | 0          |
| <i>LRRC48</i>       | Pituitary | 1.37E-07   | 0.000225  | 0.132195 | other          | 0          |
| <i>LRRC4C</i>       | Pituitary | 4.34E-10   | -0.00047  | 0.00096  | other          | 0          |
| <i>LUZP2</i>        | Pituitary | 7.34E-09   | -0.00073  | 6.25E-08 | decreasing     | 1          |
| <i>MAP1A</i>        | Pituitary | 4.96E-06   | 0.000725  | 5.13E-08 | increasing     | 0          |
| <i>MAP2K6</i>       | Pituitary | 5.89E-10   | -0.00062  | 3.75E-06 | decreasing     | 0          |
| <i>MARCH1</i>       | Pituitary | 1.84E-07   | 0.00078   | 2.83E-09 | increasing     | 0          |
| <i>MARCKSL1</i>     | Pituitary | 1.30E-07   | -0.00075  | 2.79E-09 | decreasing     | 0          |
| <i>MCM3</i>         | Pituitary | 8.26E-08   | -0.00055  | 6.60E-05 | decreasing     | 0          |
| <i>MCM5</i>         | Pituitary | 8.97E-08   | -0.00056  | 5.37E-05 | decreasing     | 0          |
| <i>MCTP2</i>        | Pituitary | 8.07E-06   | 0.000696  | 8.59E-08 | increasing     | 0          |
| <i>MEGF10</i>       | Pituitary | 1.22E-07   | 0.0003    | 0.037269 | other          | 0          |
| <i>MELK</i>         | Pituitary | 1.29E-10   | -0.00069  | 1.21E-07 | decreasing     | 0          |
| <i>MFAP2</i>        | Pituitary | 6.58E-11   | -0.00079  | 1.99E-10 | decreasing     | 0          |
| <i>MIS18BP1</i>     | Pituitary | 3.41E-08   | -0.00042  | 0.003531 | other          | 0          |
| <i>MKI67</i>        | Pituitary | 2.07E-10   | -0.00068  | 3.55E-07 | decreasing     | 0          |
| <i>MKRN3</i>        | Pituitary | 6.84E-09   | -0.00062  | 1.07E-05 | decreasing     | 0          |

**Supplementary Table 9. Genes with a significant age effect from either ANOVA or linear regression. Beta is the regression coefficient, Pval is the p-value for the regression coefficient of expression on age (in days). Effect category is increasing if beta is positive and significant, decreasing if beta is negative and significant, and other if the ANOVA were significant rather than the linear regression. Local eQTL is 1 if the gene had a significant local eQTL**

| Gene           | Tissue    | Anova.pval | Beta     | Pval     | EffectCategory | Local eQTL |
|----------------|-----------|------------|----------|----------|----------------|------------|
| <i>MMP14</i>   | Pituitary | 4.24E-06   | -0.00071 | 4.10E-08 | decreasing     | 0          |
| <i>MMP16</i>   | Pituitary | 3.48E-08   | -0.00054 | 8.44E-05 | decreasing     | 0          |
| <i>MOXD1</i>   | Pituitary | 1.63E-07   | -0.00069 | 9.53E-08 | decreasing     | 0          |
| <i>MPPED2</i>  | Pituitary | 3.38E-10   | -0.00078 | 2.56E-09 | decreasing     | 0          |
| <i>MSI1</i>    | Pituitary | 2.00E-06   | -0.00072 | 2.07E-08 | decreasing     | 0          |
| <i>MUC15</i>   | Pituitary | 3.01E-11   | -0.00073 | 2.24E-08 | decreasing     | 0          |
| <i>MXD3</i>    | Pituitary | 1.61E-07   | -0.00049 | 0.000371 | other          | 0          |
| <i>MYADML2</i> | Pituitary | 1.32E-09   | -0.00042 | 0.004321 | other          | 0          |
| <i>MYBL2</i>   | Pituitary | 2.77E-12   | -0.00074 | 5.86E-09 | decreasing     | 0          |
| <i>MYCN</i>    | Pituitary | 1.79E-10   | -0.00074 | 2.16E-08 | decreasing     | 0          |
| <i>NASP</i>    | Pituitary | 6.80E-10   | -0.00071 | 1.70E-07 | decreasing     | 0          |
| <i>NAT16</i>   | Pituitary | 2.30E-07   | 0.000444 | 0.001584 | other          | 0          |
| <i>NCAPG</i>   | Pituitary | 8.37E-08   | -0.00077 | 3.81E-09 | decreasing     | 0          |
| <i>NDC80</i>   | Pituitary | 3.99E-11   | -0.00072 | 1.88E-08 | decreasing     | 0          |
| <i>NECAB1</i>  | Pituitary | 3.60E-08   | 0.000673 | 1.23E-06 | increasing     | 0          |
| <i>NEFH</i>    | Pituitary | 3.55E-15   | 0.000774 | 6.06E-10 | increasing     | 0          |
| <i>NEFL</i>    | Pituitary | 4.41E-18   | 0.000855 | 6.10E-13 | increasing     | 0          |
| <i>NEFM</i>    | Pituitary | 6.64E-11   | 0.00066  | 5.61E-07 | increasing     | 0          |
| <i>NEIL3</i>   | Pituitary | 3.47E-08   | -0.00055 | 6.86E-05 | decreasing     | 0          |
| <i>NEK2</i>    | Pituitary | 1.41E-08   | -0.00061 | 8.48E-06 | decreasing     | 0          |
| <i>NFIA</i>    | Pituitary | 3.06E-08   | -0.00041 | 0.003857 | other          | 0          |
| <i>NHSL1</i>   | Pituitary | 9.63E-08   | -0.00077 | 1.11E-08 | decreasing     | 0          |
| <i>NKX2.8</i>  | Pituitary | 2.33E-07   | 0.000782 | 1.55E-09 | increasing     | 0          |
| <i>NLGN3</i>   | Pituitary | 5.56E-08   | -0.00073 | 9.77E-09 | decreasing     | 0          |
| <i>NOP9</i>    | Pituitary | 2.88E-08   | 0.000278 | 0.066323 | other          | 0          |
| <i>NPW</i>     | Pituitary | 6.13E-08   | 0.000455 | 0.001974 | other          | 0          |
| <i>NREP</i>    | Pituitary | 2.23E-19   | -0.00089 | 1.11E-14 | decreasing     | 0          |
| <i>NRG2</i>    | Pituitary | 5.41E-10   | 0.000699 | 1.14E-07 | increasing     | 0          |
| <i>NRTN</i>    | Pituitary | 1.52E-08   | -0.00075 | 4.68E-09 | decreasing     | 0          |
| <i>NT5DC2</i>  | Pituitary | 5.93E-08   | -0.00053 | 0.0002   | other          | 0          |
| <i>NTF3</i>    | Pituitary | 1.21E-09   | -0.00068 | 1.79E-07 | decreasing     | 0          |
| <i>NTM</i>     | Pituitary | 1.87E-07   | -0.0003  | 0.045251 | other          | 0          |
| <i>NUCKS1</i>  | Pituitary | 2.27E-07   | 8.24E-06 | 0.95526  | other          | 0          |
| <i>NUF2</i>    | Pituitary | 2.66E-11   | -0.00071 | 4.95E-08 | decreasing     | 0          |
| <i>NUP155</i>  | Pituitary | 1.02E-07   | 3.94E-05 | 0.796819 | other          | 0          |
| <i>NUSAP1</i>  | Pituitary | 8.59E-12   | -0.00078 | 1.45E-09 | decreasing     | 0          |
| <i>NXPE3</i>   | Pituitary | 6.21E-08   | 0.000537 | 9.36E-05 | increasing     | 0          |
| <i>ODC1</i>    | Pituitary | 2.62E-09   | -0.00075 | 1.10E-08 | decreasing     | 0          |
| <i>OSBPL2</i>  | Pituitary | 9.30E-10   | 0.000752 | 2.88E-09 | increasing     | 0          |
| <i>P2RY1</i>   | Pituitary | 1.04E-11   | -0.00077 | 9.31E-10 | decreasing     | 0          |

**Supplementary Table 9. Genes with a significant age effect from either ANOVA or linear regression. Beta is the regression coefficient, Pval is the p-value for the regression coefficient of expression on age (in days). Effect category is increasing if beta is positive and significant, decreasing if beta is negative and significant, and other if the ANOVA were significant rather than the linear regression. Local eQTL is 1 if the gene had a significant local eQTL**

| Gene            | Tissue    | Anova.pval | Beta      | Pval     | EffectCategory | Local eQTL |
|-----------------|-----------|------------|-----------|----------|----------------|------------|
| <i>PADI2</i>    | Pituitary | 1.26E-08   | -0.00067  | 3.05E-07 | decreasing     | 0          |
| <i>PARP4</i>    | Pituitary | 8.74E-08   | 0.000713  | 1.63E-07 | increasing     | 1          |
| <i>PBK</i>      | Pituitary | 1.18E-13   | -0.0007   | 1.28E-07 | decreasing     | 0          |
| <i>PCCB</i>     | Pituitary | 2.04E-08   | 0.000433  | 0.002132 | other          | 0          |
| <i>PCDH11X</i>  | Pituitary | 6.15E-08   | -0.00073  | 1.49E-08 | decreasing     | 0          |
| <i>PCDH20</i>   | Pituitary | 4.06E-10   | -8.35E-05 | 0.581363 | other          | 0          |
| <i>PCDH8</i>    | Pituitary | 4.87E-10   | 0.000464  | 0.001592 | other          | 0          |
| <i>PCDH9</i>    | Pituitary | 3.49E-09   | -0.00047  | 0.00078  | other          | 0          |
| <i>PCLO</i>     | Pituitary | 2.13E-06   | 0.000693  | 1.00E-07 | increasing     | 0          |
| <i>PDCD1</i>    | Pituitary | 9.98E-08   | 0.000482  | 0.000986 | other          | 0          |
| <i>PDF</i>      | Pituitary | 9.23E-08   | 0.000131  | 0.388336 | other          | 0          |
| <i>PDPN</i>     | Pituitary | 2.42E-08   | -0.00071  | 3.47E-08 | decreasing     | 0          |
| <i>PGBD5</i>    | Pituitary | 4.95E-10   | 0.000756  | 2.20E-09 | increasing     | 0          |
| <i>PHGDH</i>    | Pituitary | 3.11E-10   | -0.00079  | 9.71E-10 | decreasing     | 0          |
| <i>PI4KA</i>    | Pituitary | 2.52E-10   | 0.000801  | 2.53E-10 | increasing     | 0          |
| <i>PIBF1</i>    | Pituitary | 2.35E-07   | -0.00043  | 0.002455 | other          | 0          |
| <i>PINLYP</i>   | Pituitary | 1.20E-07   | 0.000586  | 1.50E-05 | increasing     | 0          |
| <i>PLD2</i>     | Pituitary | 4.25E-06   | -0.00072  | 1.92E-08 | decreasing     | 0          |
| <i>PLEKHA5</i>  | Pituitary | 2.06E-07   | -0.00043  | 0.00203  | other          | 0          |
| <i>PLS1</i>     | Pituitary | 1.22E-08   | 0.0006    | 8.50E-06 | increasing     | 0          |
| <i>PNOC</i>     | Pituitary | 2.51E-08   | -0.00068  | 1.98E-07 | decreasing     | 0          |
| <i>PNPLA5</i>   | Pituitary | 1.60E-07   | 0.000349  | 0.014724 | other          | 0          |
| <i>PNPO</i>     | Pituitary | 6.31E-08   | 0.000277  | 0.055606 | other          | 0          |
| <i>POC1A</i>    | Pituitary | 2.03E-08   | -0.00068  | 1.93E-07 | decreasing     | 0          |
| <i>POLE2</i>    | Pituitary | 1.23E-08   | -0.00055  | 9.79E-05 | decreasing     | 0          |
| <i>POU6F2</i>   | Pituitary | 3.55E-12   | 0.000631  | 2.29E-06 | increasing     | 0          |
| <i>PPARGC1A</i> | Pituitary | 2.24E-07   | -0.00057  | 2.44E-05 | decreasing     | 0          |
| <i>PPP2R2C</i>  | Pituitary | 4.72E-07   | 0.000702  | 6.29E-08 | increasing     | 0          |
| <i>PRICKLE1</i> | Pituitary | 1.33E-09   | -1.49E-06 | 0.992032 | other          | 0          |
| <i>PRLHR</i>    | Pituitary | 1.07E-05   | 0.00068   | 2.08E-07 | increasing     | 0          |
| <i>PRRT4</i>    | Pituitary | 6.87E-07   | -0.00073  | 8.53E-08 | decreasing     | 0          |
| <i>PTCHD4</i>   | Pituitary | 2.58E-08   | 0.000514  | 0.000204 | other          | 0          |
| <i>PTGFRN</i>   | Pituitary | 1.98E-08   | -0.00056  | 4.82E-05 | decreasing     | 1          |
| <i>PVRL3</i>    | Pituitary | 9.96E-08   | -0.00053  | 0.000107 | other          | 0          |
| <i>QRFPR</i>    | Pituitary | 1.29E-12   | -0.00076  | 1.71E-09 | decreasing     | 0          |
| <i>QSOX2</i>    | Pituitary | 3.72E-08   | 0.000372  | 0.008981 | other          | 0          |
| <i>RAB29</i>    | Pituitary | 2.57E-07   | 0.000512  | 0.000387 | other          | 0          |
| <i>RAI1</i>     | Pituitary | 2.85E-07   | 0.000712  | 1.20E-07 | increasing     | 0          |
| <i>RALGPS2</i>  | Pituitary | 1.66E-06   | 0.000721  | 2.01E-08 | increasing     | 0          |
| <i>RBBP8</i>    | Pituitary | 7.33E-12   | -0.00068  | 8.76E-07 | decreasing     | 0          |



**Supplementary Table 9. Genes with a significant age effect from either ANOVA or linear regression. Beta is the regression coefficient, Pval is the p-value for the regression coefficient of expression on age (in days). Effect category is increasing if beta is positive and significant, decreasing if beta is negative and significant, and other if the ANOVA were significant rather than the linear regression. Local eQTL is 1 if the gene had a significant local eQTL**

| Gene            | Tissue    | Anova.pval | Beta      | Pval     | EffectCategory | Local eQTL |
|-----------------|-----------|------------|-----------|----------|----------------|------------|
| <i>RBM20</i>    | Pituitary | 2.48E-11   | 0.000805  | 8.83E-10 | increasing     | 0          |
| <i>RBM7</i>     | Pituitary | 8.24E-08   | -7.36E-05 | 0.624091 | other          | 0          |
| <i>RBMS1</i>    | Pituitary | 2.27E-07   | -0.00065  | 1.03E-06 | decreasing     | 0          |
| <i>RBP4</i>     | Pituitary | 1.39E-11   | 0.000279  | 0.053863 | other          | 0          |
| <i>RCN1</i>     | Pituitary | 5.73E-10   | -0.00071  | 3.20E-08 | decreasing     | 0          |
| <i>RCN2</i>     | Pituitary | 2.85E-07   | -0.00075  | 4.23E-09 | decreasing     | 0          |
| <i>RGS13</i>    | Pituitary | 6.22E-08   | -0.00073  | 2.27E-08 | decreasing     | 0          |
| <i>RHOU</i>     | Pituitary | 5.74E-10   | -0.0006   | 1.40E-05 | decreasing     | 0          |
| <i>RIMS2</i>    | Pituitary | 1.55E-05   | 0.00069   | 1.22E-07 | increasing     | 0          |
| <i>RIMS4</i>    | Pituitary | 4.48E-08   | 0.000481  | 0.000891 | other          | 0          |
| <i>RIN1</i>     | Pituitary | 4.49E-09   | 0.000618  | 1.15E-05 | increasing     | 0          |
| <i>RIT1</i>     | Pituitary | 2.44E-07   | -0.00038  | 0.008693 | other          | 0          |
| <i>RMI1</i>     | Pituitary | 1.08E-08   | -0.00027  | 0.05804  | other          | 0          |
| <i>RMI2</i>     | Pituitary | 8.12E-09   | -0.00062  | 5.77E-06 | decreasing     | 0          |
| <i>RRP12</i>    | Pituitary | 3.28E-08   | 0.000292  | 0.045528 | other          | 0          |
| <i>RSPO2</i>    | Pituitary | 1.33E-05   | 0.000713  | 1.84E-07 | increasing     | 0          |
| <i>RTKN2</i>    | Pituitary | 3.83E-08   | 0.000128  | 0.401169 | other          | 0          |
| <i>RUNX3</i>    | Pituitary | 3.24E-09   | 0.000544  | 0.000122 | other          | 0          |
| <i>SCARB2</i>   | Pituitary | 7.41E-08   | -0.00069  | 1.14E-07 | decreasing     | 0          |
| <i>SCN2A</i>    | Pituitary | 2.33E-07   | 0.000721  | 2.10E-08 | increasing     | 0          |
| <i>SEC16B</i>   | Pituitary | 7.27E-10   | 0.000471  | 0.000747 | other          | 0          |
| <i>SEPT8</i>    | Pituitary | 2.57E-09   | 0.000346  | 0.020116 | other          | 0          |
| <i>SERINC2</i>  | Pituitary | 5.48E-10   | -0.00072  | 8.62E-08 | decreasing     | 0          |
| <i>SGOL1</i>    | Pituitary | 4.68E-11   | -0.00064  | 3.27E-06 | decreasing     | 0          |
| <i>SGOL2</i>    | Pituitary | 7.37E-10   | -0.00067  | 5.02E-07 | decreasing     | 0          |
| <i>SHH</i>      | Pituitary | 1.67E-08   | -0.00051  | 0.000223 | other          | 0          |
| <i>SKA2</i>     | Pituitary | 7.83E-09   | -0.00043  | 0.003094 | other          | 0          |
| <i>SKA3</i>     | Pituitary | 1.11E-07   | -0.00043  | 0.002514 | other          | 0          |
| <i>SKAP2</i>    | Pituitary | 1.17E-15   | 0.000831  | 3.22E-11 | increasing     | 1          |
| <i>SLC15A1</i>  | Pituitary | 6.02E-09   | -0.00076  | 1.01E-08 | decreasing     | 0          |
| <i>SLC16A9</i>  | Pituitary | 5.76E-08   | -0.00066  | 1.20E-06 | decreasing     | 0          |
| <i>SLC25A45</i> | Pituitary | 2.04E-10   | 0.000546  | 0.000112 | other          | 0          |
| <i>SLC39A10</i> | Pituitary | 1.11E-07   | -0.0006   | 7.55E-06 | decreasing     | 0          |
| <i>SLC46A3</i>  | Pituitary | 7.93E-08   | 0.0007    | 2.74E-07 | increasing     | 1          |
| <i>SLC6A5</i>   | Pituitary | 6.51E-08   | 0.000567  | 4.03E-05 | increasing     | 0          |
| <i>SLC8A2</i>   | Pituitary | 1.28E-06   | 0.000706  | 4.95E-08 | increasing     | 0          |
| <i>SLC9A6</i>   | Pituitary | 1.95E-07   | -0.00057  | 2.99E-05 | decreasing     | 0          |
| <i>SLCO1C1</i>  | Pituitary | 3.07E-10   | -0.00071  | 4.48E-08 | decreasing     | 0          |
| <i>SLITRK1</i>  | Pituitary | 3.10E-10   | -0.00074  | 8.00E-09 | decreasing     | 0          |
| <i>SLITRK5</i>  | Pituitary | 1.71E-07   | -0.00055  | 0.000134 | other          | 0          |

**Supplementary Table 9. Genes with a significant age effect from either ANOVA or linear regression. Beta is the regression coefficient, Pval is the p-value for the regression coefficient of expression on age (in days). Effect category is increasing if beta is positive and significant, decreasing if beta is negative and significant, and other if the ANOVA were significant rather than the linear regression. Local eQTL is 1 if the gene had a significant local eQTL**

| Gene            | Tissue    | Anova.pval | Beta      | Pval     | EffectCategory | Local eQTL |
|-----------------|-----------|------------|-----------|----------|----------------|------------|
| <i>SMARCA2</i>  | Pituitary | 2.68E-05   | 0.000696  | 8.52E-08 | increasing     | 0          |
| <i>SMEK2</i>    | Pituitary | 1.66E-07   | -0.00022  | 0.149273 | other          | 0          |
| <i>SMPDL3A</i>  | Pituitary | 4.48E-09   | -0.00063  | 2.85E-06 | decreasing     | 0          |
| <i>SNRPA1</i>   | Pituitary | 1.38E-07   | -0.00056  | 4.98E-05 | decreasing     | 0          |
| <i>SNX1</i>     | Pituitary | 4.03E-08   | 0.000235  | 0.122224 | other          | 0          |
| <i>SOX11</i>    | Pituitary | 1.38E-12   | -0.00072  | 2.70E-08 | decreasing     | 1          |
| <i>SPARC</i>    | Pituitary | 4.93E-08   | -0.00063  | 1.91E-06 | decreasing     | 0          |
| <i>SPATS2L</i>  | Pituitary | 1.80E-08   | -0.00068  | 2.67E-07 | decreasing     | 0          |
| <i>SPC25</i>    | Pituitary | 1.78E-12   | -0.00073  | 1.57E-08 | decreasing     | 0          |
| <i>SPINK2</i>   | Pituitary | 1.06E-10   | -0.00071  | 8.91E-08 | decreasing     | 0          |
| <i>SPR</i>      | Pituitary | 7.17E-08   | 0.000116  | 0.446065 | other          | 0          |
| <i>SPTBN4</i>   | Pituitary | 3.03E-08   | 0.000607  | 6.50E-06 | increasing     | 0          |
| <i>SPTSSA</i>   | Pituitary | 5.44E-09   | -0.00064  | 1.76E-06 | decreasing     | 0          |
| <i>SREK1IP1</i> | Pituitary | 1.39E-08   | -1.79E-05 | 0.906728 | other          | 0          |
| <i>ST6GAL2</i>  | Pituitary | 1.55E-08   | -0.00055  | 5.12E-05 | decreasing     | 0          |
| <i>ST8SIA4</i>  | Pituitary | 2.24E-07   | -0.00057  | 3.52E-05 | decreasing     | 0          |
| <i>STAT4</i>    | Pituitary | 1.94E-08   | 0.000726  | 1.48E-08 | increasing     | 0          |
| <i>STAT5B</i>   | Pituitary | 1.13E-07   | 0.000472  | 0.000722 | other          | 0          |
| <i>STEAP2</i>   | Pituitary | 1.86E-07   | 0.000722  | 3.26E-08 | increasing     | 0          |
| <i>STMN4</i>    | Pituitary | 6.68E-09   | -0.00072  | 1.48E-07 | decreasing     | 0          |
| <i>SWAP70</i>   | Pituitary | 3.10E-08   | -0.00039  | 0.00561  | other          | 0          |
| <i>SYCE3</i>    | Pituitary | 1.12E-07   | -0.00061  | 5.61E-06 | decreasing     | 0          |
| <i>SYNE1</i>    | Pituitary | 5.54E-09   | 0.000761  | 1.53E-09 | increasing     | 0          |
| <i>SYT7</i>     | Pituitary | 2.79E-08   | 0.000612  | 5.25E-06 | increasing     | 0          |
| <i>TAC1</i>     | Pituitary | 4.31E-11   | 0.000233  | 0.117846 | other          | 0          |
| <i>TACC3</i>    | Pituitary | 5.40E-10   | -0.00053  | 0.000158 | other          | 0          |
| <i>TBC1D1</i>   | Pituitary | 3.59E-10   | 0.000643  | 3.09E-06 | increasing     | 0          |
| <i>TBX1</i>     | Pituitary | 2.63E-08   | 0.00014   | 0.360831 | other          | 0          |
| <i>TBX20</i>    | Pituitary | 2.40E-09   | -0.00067  | 5.99E-07 | decreasing     | 0          |
| <i>TCF19</i>    | Pituitary | 2.22E-07   | -0.00058  | 2.84E-05 | decreasing     | 0          |
| <i>TEX40</i>    | Pituitary | 1.34E-07   | -2.35E-05 | 0.876543 | other          | 0          |
| <i>TICRR</i>    | Pituitary | 1.45E-07   | -0.0006   | 1.12E-05 | decreasing     | 0          |
| <i>TK1</i>      | Pituitary | 1.68E-07   | -0.00063  | 2.45E-06 | decreasing     | 0          |
| <i>TMEFF1</i>   | Pituitary | 2.46E-09   | -0.00063  | 4.98E-06 | decreasing     | 0          |
| <i>TMEM114</i>  | Pituitary | 6.53E-08   | 0.000364  | 0.010832 | other          | 0          |
| <i>TMEM155</i>  | Pituitary | 2.03E-09   | -0.00075  | 2.40E-09 | decreasing     | 0          |
| <i>TMEM191C</i> | Pituitary | 2.39E-08   | 0.000291  | 0.046088 | other          | 0          |
| <i>TMEM238</i>  | Pituitary | 3.96E-09   | 0.000149  | 0.327797 | other          | 0          |
| <i>TMEM257</i>  | Pituitary | 3.08E-08   | -0.00066  | 4.96E-07 | decreasing     | 0          |
| <i>TMEM74</i>   | Pituitary | 2.14E-08   | -0.00068  | 3.12E-07 | decreasing     | 0          |

**Supplementary Table 9. Genes with a significant age effect from either ANOVA or linear regression. Beta is the regression coefficient, Pval is the p-value for the regression coefficient of expression on age (in days). Effect category is increasing if beta is positive and significant, decreasing if beta is negative and significant, and other if the ANOVA were significant rather than the linear regression. Local eQTL is 1 if the gene had a significant local eQTL**

| Gene             | Tissue    | Anova.pval | Beta      | Pval     | EffectCategory | Local eQTL |
|------------------|-----------|------------|-----------|----------|----------------|------------|
| <i>TMEM86B</i>   | Pituitary | 1.84E-07   | 0.000469  | 0.001153 | other          | 0          |
| <i>TMOD1</i>     | Pituitary | 9.91E-08   | 0.000608  | 6.20E-06 | increasing     | 0          |
| <i>TMPO</i>      | Pituitary | 1.59E-08   | -0.00058  | 1.97E-05 | decreasing     | 0          |
| <i>TMSB15A</i>   | Pituitary | 2.82E-09   | -0.00043  | 0.002583 | other          | 0          |
| <i>TMSB15B</i>   | Pituitary | 1.61E-11   | -0.00079  | 6.92E-10 | decreasing     | 0          |
| <i>TNFRSF10B</i> | Pituitary | 1.94E-09   | 0.000429  | 0.003745 | other          | 0          |
| <i>TNFRSF19</i>  | Pituitary | 5.46E-09   | -0.00069  | 1.22E-07 | decreasing     | 0          |
| <i>TOP2A</i>     | Pituitary | 8.71E-12   | -0.00072  | 1.87E-08 | decreasing     | 0          |
| <i>TPH2</i>      | Pituitary | 4.67E-09   | 0.000401  | 0.004683 | other          | 0          |
| <i>TPX2</i>      | Pituitary | 2.36E-11   | -0.00076  | 1.21E-09 | decreasing     | 0          |
| <i>TRADD</i>     | Pituitary | 1.70E-07   | 0.000322  | 0.029594 | other          | 0          |
| <i>TROAP</i>     | Pituitary | 4.05E-13   | -0.00067  | 6.64E-07 | decreasing     | 0          |
| <i>TRPV3</i>     | Pituitary | 2.41E-07   | 0.000678  | 9.63E-07 | increasing     | 0          |
| <i>TSHB</i>      | Pituitary | 6.78E-08   | 6.48E-05  | 0.658726 | other          | 0          |
| <i>TSHZ3</i>     | Pituitary | 1.44E-09   | 0.000828  | 1.68E-10 | increasing     | 0          |
| <i>TSPAN2</i>    | Pituitary | 4.99E-06   | -0.00071  | 1.68E-07 | decreasing     | 0          |
| <i>TSPYL1</i>    | Pituitary | 1.01E-07   | 0.000618  | 6.52E-06 | increasing     | 1          |
| <i>TSPYL2</i>    | Pituitary | 1.38E-08   | 0.000657  | 6.73E-07 | increasing     | 0          |
| <i>TTC39A</i>    | Pituitary | 1.08E-08   | 0.000649  | 9.57E-07 | increasing     | 0          |
| <i>TTK</i>       | Pituitary | 2.81E-08   | -0.00058  | 3.08E-05 | decreasing     | 0          |
| <i>TUBA8</i>     | Pituitary | 5.80E-06   | 0.000689  | 1.28E-07 | increasing     | 1          |
| <i>TUBB1</i>     | Pituitary | 5.06E-08   | -0.00034  | 0.022517 | other          | 0          |
| <i>UBE2C</i>     | Pituitary | 8.73E-10   | -0.00066  | 1.33E-06 | decreasing     | 0          |
| <i>UCP3</i>      | Pituitary | 5.63E-08   | -0.00043  | 0.002436 | other          | 0          |
| <i>UGCG</i>      | Pituitary | 1.55E-07   | -0.00023  | 0.111464 | other          | 0          |
| <i>UHRF1</i>     | Pituitary | 7.38E-10   | -0.00077  | 1.08E-09 | decreasing     | 0          |
| <i>USP11</i>     | Pituitary | 9.94E-08   | 0.000747  | 7.36E-09 | increasing     | 0          |
| <i>VEGFC</i>     | Pituitary | 7.34E-08   | -0.00071  | 3.16E-08 | decreasing     | 0          |
| <i>VSIG1</i>     | Pituitary | 3.26E-12   | -0.00068  | 7.33E-07 | decreasing     | 0          |
| <i>VSNL1</i>     | Pituitary | 2.27E-07   | 0.000689  | 4.70E-07 | increasing     | 0          |
| <i>VSTM2A</i>    | Pituitary | 7.20E-12   | -0.0008   | 8.85E-10 | decreasing     | 0          |
| <i>WEE1</i>      | Pituitary | 5.58E-08   | -0.00068  | 5.53E-07 | decreasing     | 0          |
| <i>WFS1</i>      | Pituitary | 6.83E-08   | 0.00062   | 3.74E-06 | increasing     | 0          |
| <i>WNT1</i>      | Pituitary | 1.25E-09   | -0.00019  | 0.191262 | other          | 0          |
| <i>WNT10B</i>    | Pituitary | 3.74E-10   | -0.00016  | 0.273472 | other          | 0          |
| <i>WNT5A</i>     | Pituitary | 6.07E-12   | -0.0008   | 1.00E-09 | decreasing     | 0          |
| <i>XPC</i>       | Pituitary | 1.91E-07   | -1.19E-05 | 0.937335 | other          | 0          |
| <i>XPR1</i>      | Pituitary | 1.87E-07   | -0.00038  | 0.00817  | other          | 0          |
| <i>ZFP42</i>     | Pituitary | 1.61E-10   | -0.00071  | 1.95E-07 | decreasing     | 1          |
| <i>ZNF185</i>    | Pituitary | 1.05E-07   | -0.00072  | 1.38E-07 | decreasing     | 0          |

**Supplementary Table 9. Genes with a significant age effect from either ANOVA or linear regression. Beta is the regression coefficient, Pval is the p-value for the regression coefficient of expression on age (in days). Effect category is increasing if beta is positive and significant, decreasing if beta is negative and significant, and other if the ANOVA were significant rather than the linear regression. Local eQTL is 1 if the gene had a significant local eQTL**

| Gene          | Tissue    | Anova.pval | Beta     | Pval     | EffectCategory | Local eQTL |
|---------------|-----------|------------|----------|----------|----------------|------------|
| <i>ZNF22</i>  | Pituitary | 1.25E-08   | -0.00064 | 3.80E-06 | decreasing     | 0          |
| <i>ZNF311</i> | Pituitary | 1.68E-06   | -0.00073 | 1.48E-08 | decreasing     | 0          |
| <i>ZNF367</i> | Pituitary | 1.25E-10   | -0.00053 | 0.000104 | other          | 0          |
| <i>ZNF521</i> | Pituitary | 5.28E-17   | -0.00083 | 4.53E-12 | decreasing     | 0          |
| <i>ZNF543</i> | Pituitary | 5.74E-09   | 7.94E-05 | 0.604762 | other          | 0          |
| <i>ZNF596</i> | Pituitary | 1.77E-07   | -0.00029 | 0.041848 | other          | 0          |
| <i>ZNF711</i> | Pituitary | 4.03E-09   | -0.00069 | 2.27E-07 | decreasing     | 0          |
| <i>ZWINT</i>  | Pituitary | 4.86E-08   | -0.00044 | 0.00228  | other          | 0          |

**Supplementary Table 10. The proportion of Bonferroni-significant eQTL from Dataset 2 to fall in four SNP MAF bins**

|                     | eQTL MAF bin |        |        |        |
|---------------------|--------------|--------|--------|--------|
|                     | 10-20%       | 20-30% | 30-40% | 40-50% |
| <b>Local eQTL</b>   |              |        |        |        |
| Adrenal             | 0.018        | 0.172  | 0.354  | 0.456  |
| BA46                | 0.021        | 0.191  | 0.359  | 0.429  |
| Blood               | 0.004        | 0.248  | 0.312  | 0.435  |
| Caudate             | 0.015        | 0.158  | 0.354  | 0.472  |
| Fibroblast          | 0.025        | 0.175  | 0.347  | 0.453  |
| Hippocampus         | 0.02         | 0.16   | 0.351  | 0.468  |
| Pituitary           | 0.017        | 0.182  | 0.389  | 0.412  |
| <b>Distant eQTL</b> |              |        |        |        |
| Adrenal             | 0.003        | 0.283  | 0.387  | 0.327  |
| BA46                | 0.007        | 0.262  | 0.51   | 0.222  |
| Blood               | 0            | 0.5    | 0.333  | 0.167  |
| Caudate             | 0.014        | 0.161  | 0.437  | 0.388  |
| Fibroblast          | 0.018        | 0.125  | 0.539  | 0.318  |
| Hippocampus         | 0.018        | 0.246  | 0.294  | 0.441  |
| Pituitary           | 0.067        | 0.143  | 0.258  | 0.532  |

**Supplementary Table 11. Investigation of enrichment of local eQTL in genes with significant age effect**

| Tissue    | EffectCategory | OR   | Pval     |
|-----------|----------------|------|----------|
| Adrenal   | decreasing     | 0.25 | 3.33E-08 |
| Adrenal   | increasing     | 0.38 | 0.001864 |
| Adrenal   | other          | 0.27 | 1.56E-08 |
| BA46      | decreasing     | 0.55 | 8.38E-05 |
| BA46      | increasing     | 0.48 | 2.47E-05 |
| BA46      | other          | 0.63 | 0.050519 |
| Caudate   | decreasing     | 0.35 | 6.97E-17 |
| Caudate   | increasing     | 0.53 | 2.26E-09 |
| Caudate   | other          | 0.30 | 1.36E-27 |
| Pituitary | decreasing     | 0.34 | 2.82E-05 |
| Pituitary | increasing     | 0.53 | 0.07869  |
| Pituitary | other          | 0.23 | 2.70E-06 |

**Supplementary Table 12. Comparison of specific genes with local eQTL in Vervet Dataset 2 to GTEx. The number of genes with at least one significant local eQTL in Vervet (at Bonferroni thresholds) are presented**

| Tissue      | # Local eQTL Vervet Genes <sup>a</sup> | # Vervet Genes with Human Ortholog | # Genes Tested in GTEx <sup>b</sup> | % Tested Genes p<0.05 | % Tested Genes p<0.05/#tested Genes | % Tested Genes significant genome-wide in GTEx <sup>d</sup> |
|-------------|----------------------------------------|------------------------------------|-------------------------------------|-----------------------|-------------------------------------|-------------------------------------------------------------|
| Adrenal     | 555                                    | 317                                | 279                                 | 100%                  | 49.10%                              | 25.80%                                                      |
| Blood       | 60                                     | 16                                 | 14                                  | 100%                  | 100%                                | 35.70%                                                      |
| Caudate     | 441                                    | 225                                | 196                                 | 100%                  | 50.00%                              | 18.40%                                                      |
| Hippocampus | 361                                    | 187                                | 168                                 | 100%                  | 49.40%                              | 14.30%                                                      |
| Pituitary   | 596                                    | 303                                | 282                                 | 100%                  | 45.00%                              | 18.70%                                                      |

<sup>a</sup>The number of genes with at least one significant local eQTL in Vervet, at Bonferroni corrected threshold ( $p < 6.5 \times 10^{-10}$ )

<sup>b</sup>Vervet genes with a human ortholog that were not tested in GTEx were filtered by their QC procedures

<sup>c</sup>The threshold for significance corrected for the number of genes compared between Vervet and GTEx (column 4).

<sup>d</sup>Genes were declared significant in GTEx at an FDR of 0.05

**Supplementary Table 13. Comparison of Vervet eQTL with Common Mind Consortium (CMC)****Vervet local eQTL at Bonferroni  
Thresholds**

| Tissue      | # Local eQTL<br>Vervet Genes | # Vervet Genes<br>with Human<br>Ortholog | # Genes Tested<br>in CMC | % Tested Genes<br>CMC FDR<0.20 | % Tested Genes<br>significant genome-<br>wide in CMC |
|-------------|------------------------------|------------------------------------------|--------------------------|--------------------------------|------------------------------------------------------|
| BA46        | 307                          | 183                                      | 130                      | 100%                           | 90.77%                                               |
| Caudate     | 441                          | 225                                      | 151                      | 100%                           | 87.42%                                               |
| Hippocampus | 361                          | 187                                      | 137                      | 99%                            | 87.59%                                               |

**Vervet eQTL at FDR thresholds**

|             |      |      |      |     |        |
|-------------|------|------|------|-----|--------|
| BA46        | 2251 | 1346 | 1079 | 99% | 88.60% |
| Caudate     | 3079 | 1712 | 1316 | 99% | 87.61% |
| Hippocampus | 2377 | 1391 | 1115 | 99% | 88.25% |



**Supplementary Table 14. Counts of local eQTL in regions indicated by regulatory regions/features**

| <b>Feature</b>                    | <b>Local+/Feature+</b> | <b>Local+/Feature-</b> | <b>Local-/Feature+</b> | <b>Local-/Feature-</b> |
|-----------------------------------|------------------------|------------------------|------------------------|------------------------|
| Exon                              | 44                     | 1158                   | 433                    | 16829                  |
| Intron                            | 587                    | 615                    | 6879                   | 10383                  |
| Flank                             | 52                     | 1150                   | 448                    | 16814                  |
| Intergenic                        | 519                    | 683                    | 9501                   | 7761                   |
| Liver Me <sup>a</sup>             | 7                      | 1195                   | 32                     | 17230                  |
| Liver Ac <sup>b</sup>             | 78                     | 1124                   | 582                    | 16680                  |
| Rhesus caudate Ac <sup>c</sup>    | 60                     | 1142                   | 391                    | 16871                  |
| Rhesus prefrontal Ac <sup>d</sup> | 41                     | 1161                   | 308                    | 16954                  |

<sup>a</sup>H3K4me3 marks in vervet liver

<sup>b</sup>H3K27ac marks in vervet liver

<sup>c</sup>vervet orthologous location of HDK27ac epigenetic marks in rhesus macaque caudate

<sup>d</sup>vervet orthologous location of HDK27ac epigenetic marks in rhesus macaque prefrontal cortex

Supplementary Table 15. Genes with distant eQTL on vervet chromosome 9. Gene position is given as the start of the probe that interrogates the gene, in base pairs (bp). N.distant.eQTL=number of distant eQTL for each gene in Dataset 1. SNPStart (bp) and SNPEnd (bp) present the range of positions for the associated SNPs. MinP.RNASeq.Blood is the minimum p-value obtained in evaluating association of SNPs and gene expression in Dataset 2 (RNA-Seq data). N.p<0.05 are the number of N.distant.eQTL SNPs with p<0.05 in RNA Seq analysis of gene expression in blood in Dataset 2. Pct Var is the range of percent variance in gene expression explained by SNPs in Dataset 1

| VervetGeneSymbol | GeneChr | GeneStart (bp) | N.distant.eQTL | SNPChr | SNPStart (bp) | SNPEnd (bp) | MinP.RNASeq.Blood | N.p<0.05 | Pct Var |
|------------------|---------|----------------|----------------|--------|---------------|-------------|-------------------|----------|---------|
| <i>LCMT1</i>     | chr5    | 22869269       | 76             | chr9   | 82109236      | 83568492    | 9.90E-03          | 15       | 18%-35% |
| <i>UQCR10</i>    | chr19   | 12644416       | 76             | chr9   | 82109236      | 83568492    | 9.61E-02          | 0        | 15%-34% |
| <i>ST7</i>       | chr21   | 85897845       | 152            | chr9   | 82109236      | 83568492    | 8.28E-06          | 150      | 17%-33% |
| <i>YPEL4</i>     | chr1    | 15584795       | 61             | chr9   | 82109236      | 83568492    | 1.97E-06          | 61       | 16%-37% |
| <i>TMEM57</i>    | chr20   | 107272832      | 15             | chr9   | 82159100      | 83514443    | 8.92E-03          | 8        | 18%-25% |
| <i>UBALD1</i>    | chr5    | 4295792        | 19             | chr9   | 82159100      | 83514443    | 1.46E-01          | 0        | 18%-24% |
| <i>RANBP10</i>   | chr5    | 59710718       | 42             | chr9   | 82529804      | 83514443    | 2.07E-04          | 24       | 18%-23% |
| <i>NARF</i>      | chr16   | 74400831       | 13             | chr9   | 82542787      | 83514443    | 5.72E-03          | 9        | 16%-25% |
| <i>STXBP1</i>    | chr12   | 10448338       | 11             | chr9   | 82542787      | 82852576    | 2.10E-02          | 8        | 16%-21% |
| <i>CNN3</i>      | chr20   | 38356395       | 16             | chr9   | 82544812      | 83514443    | 2.17E-01          | 0        | 16%-28% |
| <i>DEDD2</i>     | chr6    | 36402731       | 4              | chr9   | 82632170      | 82694171    | 2.05E-02          | 2        | 16%-20% |
| <i>HMBS</i>      | chr1    | 110460930      | 8              | chr9   | 82632170      | 82870235    | 2.54E-01          | 0        | 17%-20% |
| <i>THBS4</i>     | chr4    | 74274870       | 5              | chr9   | 82632170      | 82852576    | 1.76E-01          | 0        | 19%-22% |
| <i>SUGT1</i>     | chr3    | 30439128       | 1              | chr9   | 82694171      | 82694171    | 4.79E-01          | 0        | 22%     |

**Supplementary Table 16. SNP-Probe combinations to have Bonferroni significant replication of microarray CAE9 distant eQTL in RNA-Seq data. There are 27 unique SNPs associated to two genes.**

| SNP           | Probe        | VervetSymbol | Microarray Beta | Microarray P-value | RNA-Seq Beta | RNA-Seq P-value |
|---------------|--------------|--------------|-----------------|--------------------|--------------|-----------------|
| CAE9_82105141 | ILMN_1702175 | ST7          | 0.54            | 2.68E-13           | 0.73         | 1.65E-05        |
| CAE9_82106171 | ILMN_1702175 | ST7          | 0.50            | 1.65E-12           | 0.72         | 2.09E-05        |
| CAE9_82115648 | ILMN_1702175 | ST7          | 0.55            | 2.21E-13           | 0.73         | 1.65E-05        |
| CAE9_82671816 | ILMN_1702175 | ST7          | 0.63            | 2.79E-15           | 0.73         | 1.70E-05        |
| CAE9_82159980 | ILMN_1702175 | ST7          | 0.50            | 8.86E-13           | 0.72         | 2.09E-05        |
| CAE9_82171963 | ILMN_1702175 | ST7          | 0.55            | 2.06E-13           | 0.73         | 1.65E-05        |
| CAE9_82197823 | ILMN_1702175 | ST7          | 0.50            | 8.86E-13           | 0.72         | 2.09E-05        |
| CAE9_82252528 | ILMN_1702175 | ST7          | 0.55            | 1.07E-13           | 0.73         | 1.65E-05        |
| CAE9_82462519 | ILMN_1702175 | ST7          | 0.55            | 1.07E-13           | 0.73         | 1.65E-05        |
| CAE9_83183703 | ILMN_1702175 | ST7          | 0.51            | 2.32E-12           | 0.73         | 1.20E-05        |
| CAE9_82753918 | ILMN_1702175 | ST7          | 0.63            | 9.65E-18           | 0.74         | 8.28E-06        |
| CAE9_82792461 | ILMN_1702175 | ST7          | 0.63            | 9.65E-18           | 0.74         | 8.28E-06        |
| CAE9_83279014 | ILMN_1702175 | ST7          | 0.55            | 3.98E-14           | 0.75         | 1.07E-05        |
| CAE9_82115648 | ILMN_1707763 | ST7          | 0.62            | 4.23E-14           | 0.73         | 1.65E-05        |
| CAE9_82120987 | ILMN_1707763 | ST7          | 0.64            | 2.65E-12           | 0.75         | 7.60E-06        |
| CAE9_82171963 | ILMN_1707763 | ST7          | 0.63            | 1.84E-14           | 0.73         | 1.65E-05        |
| CAE9_82179403 | ILMN_1707763 | ST7          | 0.62            | 7.24E-12           | 0.75         | 7.60E-06        |
| CAE9_82197823 | ILMN_1707763 | ST7          | 0.54            | 2.77E-12           | 0.72         | 2.09E-05        |
| CAE9_82159980 | ILMN_1707763 | ST7          | 0.54            | 2.77E-12           | 0.72         | 2.09E-05        |
| CAE9_83183703 | ILMN_1707763 | ST7          | 0.60            | 5.92E-14           | 0.73         | 1.20E-05        |
| CAE9_82252528 | ILMN_1707763 | ST7          | 0.64            | 7.30E-15           | 0.73         | 1.65E-05        |
| CAE9_82308161 | ILMN_1707763 | ST7          | 0.65            | 3.56E-13           | 0.73         | 1.70E-05        |
| CAE9_82462519 | ILMN_1707763 | ST7          | 0.64            | 7.30E-15           | 0.73         | 1.65E-05        |
| CAE9_82671816 | ILMN_1707763 | ST7          | 0.75            | 1.59E-17           | 0.73         | 1.70E-05        |
| CAE9_82753918 | ILMN_1707763 | ST7          | 0.72            | 7.10E-19           | 0.74         | 8.28E-06        |
| CAE9_82792461 | ILMN_1707763 | ST7          | 0.72            | 7.10E-19           | 0.74         | 8.28E-06        |
| CAE9_82105141 | ILMN_1707763 | ST7          | 0.62            | 3.74E-14           | 0.73         | 1.65E-05        |
| CAE9_82106171 | ILMN_1707763 | ST7          | 0.54            | 6.26E-12           | 0.72         | 2.09E-05        |
| CAE9_83248692 | ILMN_1707763 | ST7          | 0.59            | 3.36E-12           | 0.73         | 1.33E-05        |
| CAE9_83279014 | ILMN_1707763 | ST7          | 0.65            | 2.18E-16           | 0.75         | 1.07E-05        |
| CAE9_83429364 | ILMN_1707763 | ST7          | 0.58            | 7.68E-12           | 0.73         | 1.68E-05        |
| CAE9_83183703 | ILMN_1726624 | YPEL4        | 0.57            | 9.14E-13           | 0.74         | 4.99E-06        |
| CAE9_82792461 | ILMN_1726624 | YPEL4        | 0.67            | 3.50E-16           | 0.77         | 1.97E-06        |
| CAE9_82853104 | ILMN_1726624 | YPEL4        | 0.62            | 8.82E-15           | 0.73         | 6.65E-06        |
| CAE9_82015581 | ILMN_1726624 | YPEL4        | 0.66            | 6.65E-12           | 0.92         | 2.96E-06        |
| CAE9_82105141 | ILMN_1726624 | YPEL4        | 0.60            | 5.02E-13           | 0.74         | 6.08E-06        |
| CAE9_82115648 | ILMN_1726624 | YPEL4        | 0.60            | 8.44E-13           | 0.74         | 6.08E-06        |
| CAE9_82116623 | ILMN_1726624 | YPEL4        | 0.57            | 4.68E-12           | 0.71         | 1.78E-05        |
| CAE9_82171963 | ILMN_1726624 | YPEL4        | 0.60            | 3.13E-13           | 0.74         | 6.08E-06        |
| CAE9_82252528 | ILMN_1726624 | YPEL4        | 0.60            | 3.43E-13           | 0.74         | 6.08E-06        |
| CAE9_82302393 | ILMN_1726624 | YPEL4        | 0.57            | 1.95E-12           | 0.71         | 1.78E-05        |
| CAE9_82308161 | ILMN_1726624 | YPEL4        | 0.68            | 2.07E-14           | 0.78         | 1.98E-06        |
| CAE9_82404232 | ILMN_1726624 | YPEL4        | 0.63            | 4.21E-13           | 0.73         | 8.56E-06        |
| CAE9_82439232 | ILMN_1726624 | YPEL4        | 0.57            | 1.95E-12           | 0.71         | 1.78E-05        |
| CAE9_82462519 | ILMN_1726624 | YPEL4        | 0.60            | 3.43E-13           | 0.74         | 6.08E-06        |
| CAE9_82671816 | ILMN_1726624 | YPEL4        | 0.77            | 3.89E-18           | 0.78         | 1.98E-06        |
| CAE9_82694171 | ILMN_1726624 | YPEL4        | 1.03            | 2.99E-27           | 0.90         | 7.85E-06        |
| CAE9_82747272 | ILMN_1726624 | YPEL4        | 0.59            | 7.01E-14           | 0.73         | 6.65E-06        |
| CAE9_82753918 | ILMN_1726624 | YPEL4        | 0.67            | 3.50E-16           | 0.77         | 1.97E-06        |
| CAE9_83248692 | ILMN_1726624 | YPEL4        | 0.62            | 1.38E-13           | 0.77         | 1.77E-06        |
| CAE9_83279014 | ILMN_1726624 | YPEL4        | 0.60            | 1.27E-13           | 0.73         | 1.09E-05        |
| CAE9_83321719 | ILMN_1726624 | YPEL4        | 0.62            | 1.58E-13           | 0.74         | 6.07E-06        |
| CAE9_83429364 | ILMN_1726624 | YPEL4        | 0.64            | 3.33E-14           | 0.79         | 9.43E-07        |

**Supplementary Table 17. Genetic correlation of expression of *IFIT1B* (ILMN\_1759155) with 14 genes with distant eQTL on CAE9, in Dataset 1.**

| <b>VervetGeneSymbol</b> | <b>Probe</b> | <b>rhoG</b> | <b>rhoGSE</b> | <b>P-value for rhoG=0</b> | <b>P-value for rhoG=1</b> |
|-------------------------|--------------|-------------|---------------|---------------------------|---------------------------|
| <i>RANBP10</i>          | ILMN_1667306 | 0.912       | 0.038         | 4.92E-11                  | 1.77E-03                  |
| <i>SUGT1</i>            | ILMN_1687675 | 0.670       | 0.089         | 6.50E-07                  | 9.55E-10                  |
| <i>LCMT1</i>            | ILMN_1688452 | 0.830       | 0.063         | 2.79E-10                  | 6.21E-05                  |
| <i>HMBS</i>             | ILMN_1694476 | 0.899       | 0.065         | 3.86E-07                  | 8.17E-02                  |
| <i>ST7</i>              | ILMN_1702175 | 0.874       | 0.064         | 9.20E-12                  | 4.95E-03                  |
| <i>ST7</i>              | ILMN_1707763 | 0.921       | 0.054         | 7.30E-13                  | 3.82E-02                  |
| <i>TMEM57</i>           | ILMN_1718831 | 0.845       | 0.055         | 4.15E-09                  | 1.03E-04                  |
| <i>YPEL4</i>            | ILMN_1726624 | 0.940       | 0.030         | 5.53E-13                  | 5.39E-03                  |
| <i>NARF</i>             | ILMN_1726884 | 0.789       | 0.058         | 1.47E-10                  | 1.56E-10                  |
| <i>UBALD1</i>           | ILMN_1733863 | 0.852       | 0.053         | 1.18E-10                  | 3.10E-06                  |
| <i>THBS4</i>            | ILMN_1736078 | 0.822       | 0.063         | 1.52E-11                  | 1.10E-05                  |
| <i>DEDD3</i>            | ILMN_1768031 | 0.649       | 0.098         | 8.25E-06                  | 2.00E-07                  |
| <i>UQCR10</i>           | ILMN_1781986 | 0.873       | 0.056         | 6.70E-14                  | 6.30E-04                  |
| <i>CNN3</i>             | ILMN_1782439 | 0.710       | 0.089         | 1.15E-05                  | 7.62E-05                  |
| <i>STXBP1</i>           | ILMN_1810657 | 0.705       | 0.077         | 1.72E-07                  | 4.95E-09                  |

**Supplementary Table 18. Association analysis of CAE9\_82694171 with gene expression of 14 genes, in Dataset 1. Analysis is also done conditional on expression of gene *IFIT1B*, for which CAE9\_82694171 is a local eQTL**

| Probe        | VervetGeneSymbol | Unconditional analysis |          |                    | Conditional on <i>IFIT1B</i> expression |          |                    |
|--------------|------------------|------------------------|----------|--------------------|-----------------------------------------|----------|--------------------|
|              |                  | Beta                   | P-value  | Variance Explained | Beta                                    | P-value  | Variance Explained |
| ILMN_1667306 | <i>RANBP10</i>   | -0.81                  | 5.33E-17 | 22.64%             | 0.12                                    | 5.23E-02 | 1.21%              |
| ILMN_1687675 | <i>SUGT1</i>     | -0.73                  | 1.53E-15 | 21.58%             | -0.25                                   | 6.83E-03 | 3.22%              |
| ILMN_1688452 | <i>LCMT1</i>     | -1.05                  | 5.74E-28 | 35.12%             | -0.45                                   | 1.40E-07 | 8.85%              |
| ILMN_1694476 | <i>HMBS</i>      | -0.74                  | 3.09E-15 | 19.68%             | 0.06                                    | 4.09E-01 | 0.26%              |
| ILMN_1702175 | <i>ST7</i>       | -0.84                  | 9.06E-23 | 30.18%             | -0.44                                   | 1.66E-07 | 7.61%              |
| ILMN_1707763 | <i>ST7</i>       | -0.96                  | 2.00E-24 | 33.18%             | -0.51                                   | 1.55E-08 | 9.95%              |
| ILMN_1718831 | <i>TMEM57</i>    | -0.88                  | 1.03E-18 | 25.37%             | -0.06                                   | 4.15E-01 | 0.26%              |
| ILMN_1726624 | <i>YPEL4</i>     | -1.03                  | 4.47E-29 | 36.55%             | -0.27                                   | 3.50E-05 | 4.81%              |
| ILMN_1726884 | <i>NARF</i>      | -0.81                  | 3.07E-16 | 24.94%             | -0.21                                   | 1.94E-02 | 1.76%              |
| ILMN_1733863 | <i>UBALD1</i>    | -0.69                  | 7.95E-18 | 23.31%             | -0.12                                   | 8.15E-02 | 0.79%              |
| ILMN_1736078 | <i>THBS4</i>     | -0.69                  | 5.19E-13 | 18.59%             | -0.14                                   | 1.22E-01 | 0.43%              |
| ILMN_1768031 | <i>DEDD2</i>     | -0.70                  | 5.48E-13 | 19.55%             | -0.19                                   | 5.05E-02 | 1.99%              |
| ILMN_1781986 | <i>UQCR10</i>    | -0.90                  | 5.81E-25 | 31.93%             | -0.45                                   | 7.96E-08 | 9.04%              |
| ILMN_1782439 | <i>CNN3</i>      | -0.90                  | 1.12E-19 | 27.77%             | -0.27                                   | 4.43E-03 | 3.51%              |
| ILMN_1810657 | <i>STXBP1</i>    | -0.79                  | 2.67E-15 | 20.92%             | -0.07                                   | 4.08E-01 | 0.48%              |

**Supplementary Table 19. (A) Unconditional (univariate) analyses of hippocampal expression of three genes as a function of lead SNPs for each gene. (B) Conditional (multivariate) analysis of hippocampal expression of three genes as a function of the gene's lead SNP and the lead SNP for one of the other genes. Lead SNPs are colored as: red=*LOC103222765* ; blue=*LOC103222769* ; green=*LOC103222771***

| A. Unconditional (Univariate) Analysis |                       |         |          |
|----------------------------------------|-----------------------|---------|----------|
| Response Variable                      | Explanatory Variable  | Beta    | P-value  |
| <i>LOC103222765</i>                    | CAE18_68730707        | -1.152  | 1.10E-10 |
|                                        | CAE18_68915135        | 0.219   | 0.204    |
|                                        | CAE18_68931864        | -0.210  | 0.275    |
| <i>LOC103222769</i>                    | CAE18_68730707        | 0.227   | 0.237    |
|                                        | CAE18_68915135        | -0.901  | 3.67E-11 |
|                                        | CAE18_68931864        | -0.920  | 3.66E-08 |
| <i>LOC103222771</i>                    | CAE18_68730707        | -0.499  | 0.011    |
|                                        | CAE18_68915135        | -0.662  | 1.06E-05 |
|                                        | CAE18_68931864        | -0.953  | 7.83E-10 |
| B. Conditional (Multivariate) Analyses |                       |         |          |
| Response Variable                      | Explanatory Variables | Beta    | P-value  |
| <i>LOC103222765</i>                    | CAE18_68730707        | -1.1652 | 3.48E-10 |
|                                        | CAE18_68915135        | -0.0349 | 0.776    |
|                                        | CAE18_68730707        | -1.1412 | 2.60E-10 |
|                                        | CAE18_68931864        | -0.0667 | 0.616    |
| <i>LOC103222769</i>                    | CAE18_68915135        | -0.9108 | 1.06E-10 |
|                                        | CAE18_68730707        | -0.0454 | 0.735    |
|                                        | CAE18_68915135        | -0.6925 | 5.37E-05 |
|                                        | CAE18_68931864        | -0.3288 | 0.078    |
| <i>LOC103222771</i>                    | CAE18_68931864        | -0.9084 | 9.19E-10 |
|                                        | CAE18_68730707        | -0.361  | 0.010    |
|                                        | CAE18_68931864        | -0.9135 | 1.96E-05 |
|                                        | CAE18_68915135        | -0.0479 | 0.785    |

**Supplementary Table 20. RNA-seq summary by Tissue**

| <b>Tissue type</b> | <b>RNA extraction method</b>          | <b>cDNA libraries and RNA-seq reads</b> | <b>Average Input Reads [Mln]</b> | <b>% of uniquely aligned reads</b> |
|--------------------|---------------------------------------|-----------------------------------------|----------------------------------|------------------------------------|
| Adrenal            | PerfectPure (N=57) and miRNeasy (N=3) | polyA (no RiboZero) 2x100bp, 2x120bp    | 56.4                             | 90                                 |
| BA46               | PerfectPure (N=55) and miRNeasy (N=3) | total RNA (RiboZero) 2x120bp            | 58                               | 77.3                               |
| Blood              | PaxGene (N=60)                        | total RNA (RiboZero) 2x100bp            | 56.5                             | 78                                 |
| Caudate            | PerfectPure (N=54), miRNeasy (N=5)    | total RNA (RiboZero) 2x100bp            | 60.3                             | 86.8                               |
| Fibroblast         | miRNeasy (N=60)                       | polyA (no RiboZero) 2x100bp, 2x120bp    | 60.9                             | 89.2                               |
| Hippocampus        | PerfectPure (N=56) and miRNeasy (N=3) | total RNA (RiboZero) 2x100bp            | 45.1                             | 78.9                               |
| Pituitary          | PerfectPure (N=55) and miRNeasy (N=5) | polyA (no RiboZero) 2x100bp, 2x120bp    | 59.3                             | 90.1                               |

**Supplementary Table 21. Approximate chronologic age correspondence between Vervet and Human**

| <b>Human Age*</b> | <b>Human Developmental Period*</b> | <b>Vervet Age</b>      | <b>Vervet Category</b>           | <b>Vervet Transcriptome Age Categories**</b> |
|-------------------|------------------------------------|------------------------|----------------------------------|----------------------------------------------|
| Birth-5 months    | Early infancy                      | 0 to 1 month           | Neonates                         | 1d, <b>7d</b> , 30d                          |
| 6-18 months       | Late infancy                       | 1.5 to 4.5 months      | Young infants                    | 60d, <b>90d</b>                              |
| 19 months-5 yrs   | Early childhood                    | 6 months to 1.25 years | Older infants to young juveniles | 180d, 270d, <b>1y, 1.25y</b>                 |
| 6-11 yrs          | Late childhood                     | 1.5 to 2.75 years      | Older juveniles                  | <b>1.5y, 1.75y, 2y, 2.5y</b>                 |
| 12-19 yrs         | Adolescence                        | 3 to 4.75 years        | Adolescents                      | <b>3y, 4y</b>                                |
| 20-60+ yrs        | Adulthood                          | 5 years +              | Adults                           | <b>5y or older</b>                           |

\* BrainSpan Atlas [Kang et al] [PMID: 22031440]

\*\*in bold vervet age categories used for comparison



**Supplementary Table 22. Approximate chronologic age  
correspondence between vervet and rhesus macaque**

| <b>Age rhesus macaques*</b> | <b>Age Vervet in Dataset 2</b> |
|-----------------------------|--------------------------------|
| 0m                          | Infants 7 days                 |
| 3m                          | Infants 90 days                |
| 12m                         | Infants 1 and 1.25 year old    |
| 48m                         | Adults 4+ years                |

\* Blueprint Non-Human Primate (NHP) Atlas [Bakken et al] [ PMID: 27409810]

**Supplementary Table 23. Matching tissues in Vervet Dataset 2 and human and rhesus macaque**

| <b>Vervet tissue</b> | <b>Human tissue*</b>                   | <b>Rhesus tissue**</b>   |
|----------------------|----------------------------------------|--------------------------|
| BA46                 | Dorsolateral Prefrontal Cortex (DLPFC) | Medial Prefrontal Cortex |
| Caudate              | Striatum                               | Basal ganglia            |
| Hippocampus          | Hippocampus                            | Hippocampus              |

\* BrainSpan Atlas [Kang et al PMID: 22031440]

\*\* Blueprint Non-Human Primate (NHP) Atlas [Bakken et al PMID: 27409810].

**Supplementary Table 24. Primers and probes for qRT-PCR**

| Gene Symbol         | Accession No.                                            | Primer & Hydrolysis Probe Sequences (5'–3')                                                             | Reporter | Amplicon Size (bp) | Tm (°C) | Slope   | Intercept | R <sup>2</sup> | Reference Stability (Std. Dev.) |
|---------------------|----------------------------------------------------------|---------------------------------------------------------------------------------------------------------|----------|--------------------|---------|---------|-----------|----------------|---------------------------------|
| <i>LOC103222765</i> | XR_493563.1                                              | Forward: TGAATGCAACCTCAGGAACTG<br>Reverse: CCTTCCTCTCAGCTTGCTTTATTC<br>Probe: CTGGGCAACCAACCTG          | FAM      | 89                 | 60      | -3.3809 | 34.17     | 0.98995        | N/A                             |
| <i>LOC103222769</i> | XR_493565.1                                              | Forward: CCGGCGAATCAGGCCTC<br>Reverse: TGGATCTGAACTGCTGTTTGAAT<br>Probe: ACAGCCAGGGAACCAAG              | FAM      | 81                 | 60      | -3.8631 | 32.03     | 0.99879        | N/A                             |
| <i>LOC103222771</i> | XR_493567.1<br>XR_493568.1<br>XR_493570.1<br>XR_493569.1 | Forward: GCTGTTTCCAAGCCCCTAG<br>Reverse: CCCAAAGACACAGGTTTATATGAAGT<br>Probe: CAGCCCCGATGTCCTT          | FAM      | 97                 | 60      | -3.5545 | 35.168    | 0.99143        | N/A                             |
| <i>HPRT1</i>        | XM_007992743.1                                           | Forward: CCAGGTTATGACCTTGATTTATTTTGGCA<br>Reverse: CAAGACGTTTCAGTCTGTCCATAAT<br>Probe: CACCCTTTCCAAATCC | FAM      | 106                | 60      | -3.4116 | 28.3      | 0.99911        | 0.25                            |
| <i>GAPDH*</i>       | XM_007967342.1                                           | Forward: CCACAGTCCACGCCATCA<br>Reverse: CCATCACGCCACAGTTTGC<br>Probe: CTGCCACCCAGAAGAC                  | FAM      | 70                 | 60      | -3.7975 | 23.8      | 0.99879        | 0.08                            |
| <i>B2M</i>          | XM_008016776.1                                           | Forward: CGTGCTCCAAGATTCAGGTTT<br>Reverse: CCCAGACACATAGCAATTCAGGAAA<br>Probe: ACTCACGCCATCCACC         | FAM      | 81                 | 60      | -3.4614 | 25.14     | 0.99911        | 0.48                            |

\*Assay also amplifies pseudogene.
